# Supplementary material for: Lead isotope analysis for provenancing ancient materials: a comparison of approaches
Source: Royal Society of Chemistry journal article supplement (doi:10.1039/d3ra02763e), 2023-01-01
Supplement: d3ra02763e1.zip [file d3ra02763e1.zip]

## Appendices

### Appendix 1: KDE method – a summary of the KDE method

This is a summary of the proof-of-principle paper by De Ceuster and Degryse<sup>2</sup> to clarify the full KDE methodology.

Starting from a database of Pb isotope ratios measured on lead ... ores, ..., a kernel density plot is drawn per ratio measured ( $^{208}\text{Pb}/^{204}\text{Pb}$ ,  $^{207}\text{Pb}/^{204}\text{Pb}$  and  $^{206}\text{Pb}/^{204}\text{Pb}$ ). A KDE is a non-parametric way to estimate the probability density function of a random, continuous variable, so that inferences about the population can be made, based on a finite data sample... Such a KDE is built up by drawing a kernel, that is, a non-negative function that integrates to 1, on each of the data points. These kernels are then summed to make the kernel density plot. The estimated density plot is thus dependent on the selected function for the kernels and the bandwidth of the kernels.<sup>2(p.110)</sup>

The choice of both parameters is further discussed in this paper's methodology section.

The measured LIA of artefacts in an assemblage can then be compared with the kernel density plots. The sum of probability under a normalized density curve is always equal to 1, or 100%. Since probability is the area under the curve, we can then specify a range to calculate the probability within this range. The relative probability that the isotope values of the measurement(s) lie in the interval of 10 times the standard deviation (SD) for all possible sources is calculated by integrating each density function over that interval. The results are shown in bar plots per region, and these relative probabilities are only to be compared within the sample studied. The region with the highest relative percentages on the three isotope ratios is the most probable source area. If no match is found, either the source area is unknown, that is, not incorporated in the reference data set of possible mineral resources used, or the Pb isotopic composition of the artefact or assemblage is a mixture of several sources. A match with an ore source can indicate a true origin of the artefact, or can be a false match where a mixture of sources gives an accidental correspondence to another ore source.<sup>2(p.111)</sup>

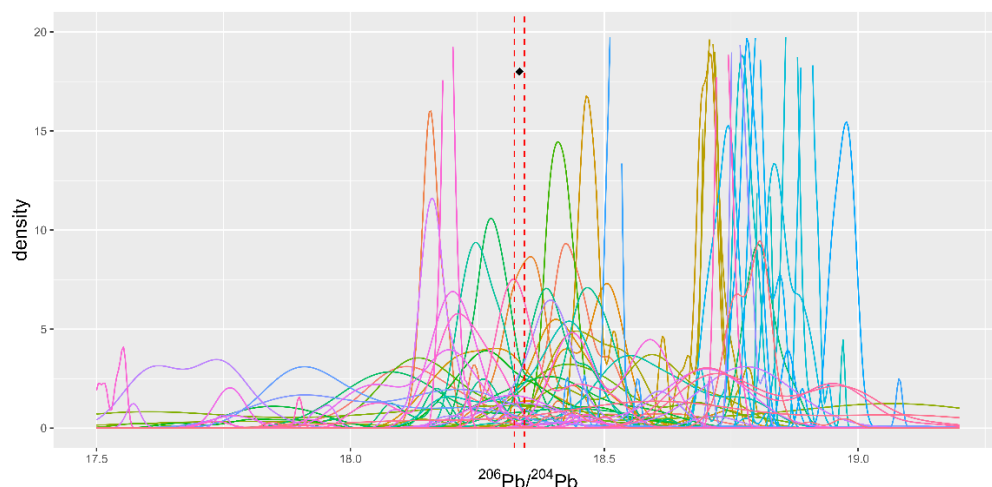

Figure: Kernel density estimate (KDE) distributions, calculated from legacy data, for all mining districts included in this study, presented for lead (Pb) isotope ratio  $^{206}\text{Pb}/^{204}\text{Pb}$ . The black diamond indicates the isotope ratio of an artefact studied; the red dashed lines indicate that value  $-10\sigma$  and  $+10\sigma$ .

## Appendix 2: Rcode

### LIA for provenancing: a comparison of approaches

##set directory

##load libraries

library(tidyverse)

library(readxl)

library(writexl)

library(ggforce)

library(ggplot2)

library(ggdendro)

library(RColorBrewer)

library(dbscan)

library(cluster)

library(whitening)

library(dendextend)

library(sfsmisc)

library(reshape2)

library(overlapping)

library(data.table)

library(dplyr)

library(Polychrome)

library(ggpubr)

##load data

# load lead database with mining regions

path <- ("Database\_Lead.xlsx")

columns <- c("text", "text", "text", "numeric", "numeric", "numeric",  
"numeric", "numeric", "text", "text")

master\_file <- path %>%

excel\_sheets() %>%

set\_names() %>%

map\_df(~ read\_excel(path = path, sheet = .x,  
col\_types = columns), .id = "Mining\_Region")

view(master\_file)

# define minimum count

minimum\_count <- 20

masterf\_minimum <- master\_file %>%

group\_by(Mining\_Region) %>%

filter(n() >= minimum\_count)

view(masterf\_minimum)

# load artefacts



```

Path_Coins <- ("roman.coinage.xlsx")
Coins <- Path_Coins %>%
  read_excel() %>%
  select(Sample, `206Pb/204Pb`, `207Pb/204Pb`, `208Pb/204Pb`)
Coins

```

```

## conventional scatterplots
con207208 <-
  ggplot(data=Coins, mapping = aes(`207Pb/204Pb`, `208Pb/204Pb`))+
  geom_point(data =masterf_minimum,
    mapping = aes(masterf_minimum$`207Pb/204Pb`,
      masterf_minimum$`208Pb/204Pb`,
      color = masterf_minimum$Mining_Region,
      shape = masterf_minimum$Mining_Region),
    size=2) +
  scale_shape_manual(values=c(1:25,33:65)) +
  geom_point(colour= "black", size = 2) +
  xlim(15.6,15.75) +
  ylim(38,39.3) +
  labs(color = "", shape = "") +
  xlab(expression({}^207*"Pb"/"*{}^204*"Pb")) +
  ylab(expression({}^208*"Pb"/"*{}^204*"Pb")) +
  theme(legend.position = "bottom",
    text = element_text(size = 20))+
  guides(color = guide_legend(ncol = 5), shape = guide_legend(ncol = 5))
con207208

```

### Note: The warning message "Removed x rows containing missing values"  
 ### is a consequence of the xlim() and ylim()  
 ### they zoom in on the coins, so a part of the ore dataset falls off the plot

```

con207206 <-
  ggplot(data=Coins, mapping = aes(`207Pb/204Pb`, `206Pb/204Pb`))+
  geom_point(data =masterf_minimum,
    mapping = aes(masterf_minimum$`207Pb/204Pb`,
      masterf_minimum$`206Pb/204Pb`,
      color = masterf_minimum$Mining_Region,
      shape = masterf_minimum$Mining_Region),
    size=2) +
  scale_shape_manual(values=c(1:25,33:65)) +
  geom_point(colour= "black", size = 2) +
  xlim(15.6,15.75) +
  ylim(18,19) +
  labs(color = "", shape = "") +
  xlab(expression({}^207*"Pb"/"*{}^204*"Pb")) +
  ylab(expression({}^206*"Pb"/"*{}^204*"Pb")) +
  theme(legend.position = "none",
    text = element_text(size = 20))+

```

```
guides(color = guide_legend(ncol = 5), shape = guide_legend(ncol = 5))
con207206
```

```
conarr <- ggarrange(con207206,con207208,
                    heights = c(1,1.5),
                    ncol = 1, nrow = 2)
conarr
```

```
plot_name <- "conarr.tiff"                ### choose format
ggsave(plot_name, plot = conarr,
        width = 52, height = 40, units = "cm",
        device = "tiff", dpi = 600)      ### set width, height, dpi...
```

```
# scatterplots per region
p <- ggplot(masterf_minimum) +
  geom_point(aes(`207Pb/204Pb`, `208Pb/204Pb`,
                color = masterf_minimum$Mining_Region)) +
  facet_wrap_paginate(~ Mining_Region, ncol = 2, nrow = 2) +
  geom_point(Coins, mapping = aes(`207Pb/204Pb`, `208Pb/204Pb`), alpha = 0.1) +
  xlim(15.6,15.75) +
  ylim(38,39.3) +
  xlab(expression({}^207"Pb"/"*{}^204"Pb")) +
  ylab(expression({}^208"Pb"/"*{}^204"Pb")) +
  labs(color = "Mining Region") +
  theme(legend.position = "none")
```

```
for(i in 1:n_pages(p)){
  p_save <- p +
    facet_wrap_paginate(~ Mining_Region, ncol = 2, nrow = 2, page = i)
  ggsave(plot = p_save, filename = paste0('ScatterplotRC207208-', i, '.jpg'))
}
```

```
q <- ggplot(masterf_minimum) +
  geom_point(aes(`207Pb/204Pb`, `206Pb/204Pb`,
                color = masterf_minimum$Mining_Region)) +
  facet_wrap_paginate(~ Mining_Region, ncol = 2, nrow = 2) +
  geom_point(Coins, mapping = aes(`207Pb/204Pb`, `206Pb/204Pb`), alpha = 0.1) +
  xlim(15.6,15.75) +
  ylim(18,19) +
  xlab(expression({}^207"Pb"/"*{}^204"Pb")) +
  ylab(expression({}^206"Pb"/"*{}^204"Pb")) +
  labs(color = "Mining Region") +
  theme(legend.position = "none")
```

```
for(i in 1:n_pages(q)){
  q_save <- q +
    facet_wrap_paginate(~ Mining_Region, ncol = 2, nrow = 2, page = i)
  ggsave(plot = q_save, filename = paste0('ScatterplotRC207206-', i, '.jpg'))
}
```

```
}
```

```
# remove mining regions
```

```
masterf_hit <- masterf_minimum %>%
```

```
  group_by(Mining_Region) %>%
```

```
  filter(!(grepl("Iran", Mining_Region) | grepl("Ireland", Mining_Region)
```

```
    | grepl("Saoudi", Mining_Region))) %>%
```

```
  ### not in the Roman Empire
```

```
  filter(!(grepl("Egypt", Mining_Region) | grepl("Felbertal", Mining_Region)
```

```
    | grepl("Pyrénées", Mining_Region) | grepl("Antiparos", Mining_Region)
```

```
    | grepl("MassaMarittima", Mining_Region) | grepl("Barcelona", Mining_Region)
```

```
    | grepl("Lugo", Mining_Region) | grepl("Teruel", Mining_Region)
```

```
    | grepl("Kythnos", Mining_Region) | grepl("Thera", Mining_Region)))
```

```
  ### no hit on the facet_wrap
```

```
view(masterf_hit)
```

```
# new scatterplots
```

```
ggplot(data=Coins, mapping = aes(`207Pb/204Pb`, `208Pb/204Pb`))+
```

```
  geom_point(data = masterf_hit,
```

```
    mapping = aes(masterf_hit$`207Pb/204Pb`, masterf_hit$`208Pb/204Pb`,
```

```
      color = masterf_hit$Mining_Region,
```

```
      shape = masterf_hit$Mining_Region),
```

```
    size=2) +
```

```
  scale_shape_manual(values= c(1:25,33:58)) +
```

```
  geom_point(colour= "black", size = 2) +
```

```
  xlim(15.55,15.75) +
```

```
  ylim(38,39.3) +
```

```
  labs(color = "Mining Region", shape = "Mining Region") +
```

```
  xlab(expression({}^207*"Pb"/"*{}^204*"Pb")) +
```

```
  ylab(expression({}^208*"Pb"/"*{}^204*"Pb")) +
```

```
  theme(legend.position = "none")
```

```
ggplot(data=Coins, mapping = aes(`207Pb/204Pb`, `206Pb/204Pb`))+
```

```
  geom_point(data = masterf_hit,
```

```
    mapping = aes(masterf_hit$`207Pb/204Pb`, masterf_hit$`206Pb/204Pb`,
```

```
      color = masterf_hit$Mining_Region,
```

```
      shape = masterf_hit$Mining_Region),
```

```
    size=2) +
```

```
  scale_shape_manual(values= c(1:25,33:58)) +
```

```
  geom_point(colour= "black", size = 2) +
```

```
  xlim(15.6,15.75) +
```

```
  ylim(18,19) +
```

```
  labs(color = "Mining Region", shape = "Mining Region") +
```

```
  xlab(expression({}^207*"Pb"/"*{}^204*"Pb")) +
```

```
  ylab(expression({}^206*"Pb"/"*{}^204*"Pb")) +
```

```
  theme(legend.position = "none")
```

```
# scatterplots per coin and per region
```

```

for(j in 1:nrow(Coins)){

r <- ggplot(masterf_minimum) +
  geom_point(aes(`207Pb/204Pb`, `208Pb/204Pb`,
    color = masterf_minimum$Mining_Region), size = 0.5) +
  facet_wrap_paginate(~ Mining_Region, ncol = 3, nrow = 3) +
  geom_point(Coins[j,], mapping = aes(`207Pb/204Pb`, `208Pb/204Pb`), color = "black", size = 0.5) +
  ggtitle(paste0('Sample ', Coins$Sample[j])) +
  xlim(15.6,15.75) +
  ylim(38,39.3) +
  xlab(expression({}^207*"Pb"/"*{}^204*"Pb")) +
  ylab(expression({}^208*"Pb"/"*{}^204*"Pb")) +
  labs(color = "Mining Region") +
  theme(legend.position = "none")

for(i in 1:n_pages(r)){
  r_save <- r +
    facet_wrap_paginate(~ Mining_Region, ncol = 3, nrow = 3, page = i)
  ggsave(plot = r_save, filename = paste0('Scatterplot207208-', Coins$Sample[j], '-', i, '.jpg'))
}
}

```

```

for(j in 1:nrow(Coins)){

s <- ggplot(masterf_minimum) +
  geom_point(aes(`207Pb/204Pb`, `206Pb/204Pb`,
    color = masterf_minimum$Mining_Region), size = 0.5) +
  facet_wrap_paginate(~ Mining_Region, ncol = 3, nrow = 3) +
  geom_point(Coins[j,], mapping = aes(`207Pb/204Pb`, `206Pb/204Pb`), color = "black", size = 0.5) +
  ggtitle(paste0('Sample ', Coins$Sample[j])) +
  xlim(15.6,15.75) +
  ylim(18,19.1) +
  xlab(expression({}^207*"Pb"/"*{}^204*"Pb")) +
  ylab(expression({}^206*"Pb"/"*{}^204*"Pb")) +
  labs(color = "Mining Region") +
  theme(legend.position = "none")

for(i in 1:n_pages(s)){
  s_save <- s +
    facet_wrap_paginate(~ Mining_Region, ncol = 3, nrow = 3, page = i)
  ggsave(plot = s_save, filename = paste0('Scatterplot207206-', Coins$Sample[j], '-', i, '.jpg'))
}
}

```

#confidence intervals

```

masterf_min_excl_TE <- masterf_minimum %>%
  filter(!(grepl("Türkiye-East", Mining_Region)))

```

```

masterf_min_excl_TE
### Türkiye-East is a very broad mining region scatter

### 2*sigma: 95% -> alpha = 0.05
### 3*sigma: 99.7% -> alpha = 0.003
alpha <- 0.05

Intervals <- masterf_min_excl_TE %>%
  select(Mining_Region, Sample, `206Pb/204Pb`, `207Pb/204Pb`, `208Pb/204Pb`) %>%
  group_by(Mining_Region) %>%
  dplyr::summarise(
    CI_lower_206 = mean(`206Pb/204Pb`) - qt(1 - alpha / 2, length(`206Pb/204Pb`) - 1) *
    sd(`206Pb/204Pb`) / sqrt(length(`206Pb/204Pb`)),
    CI_upper_206 = mean(`206Pb/204Pb`) + qt(1 - alpha / 2, length(`206Pb/204Pb`) - 1) *
    sd(`206Pb/204Pb`) / sqrt(length(`206Pb/204Pb`)),
    CI_lower_207 = mean(`207Pb/204Pb`) - qt(1 - alpha / 2, length(`207Pb/204Pb`) - 1) *
    sd(`207Pb/204Pb`) / sqrt(length(`207Pb/204Pb`)),
    CI_upper_207 = mean(`207Pb/204Pb`) + qt(1 - alpha / 2, length(`207Pb/204Pb`) - 1) *
    sd(`207Pb/204Pb`) / sqrt(length(`207Pb/204Pb`)),
    CI_lower_208 = mean(`208Pb/204Pb`) - qt(1 - alpha / 2, length(`208Pb/204Pb`) - 1) *
    sd(`208Pb/204Pb`) / sqrt(length(`208Pb/204Pb`)),
    CI_upper_208 = mean(`208Pb/204Pb`) + qt(1 - alpha / 2, length(`208Pb/204Pb`) - 1) *
    sd(`208Pb/204Pb`) / sqrt(length(`208Pb/204Pb`))
  )
Intervals

Hits <- data.frame()
Hits

for(i in 1:nrow(Coins)) {
  test206 <- between(Coins$`206Pb/204Pb`[[i]], Intervals$CI_lower_206, Intervals$CI_upper_206)
  test207 <- between(Coins$`207Pb/204Pb`[[i]], Intervals$CI_lower_207, Intervals$CI_upper_207)
  test208 <- between(Coins$`208Pb/204Pb`[[i]], Intervals$CI_lower_208, Intervals$CI_upper_208)

  df <- as_tibble(cbind(Intervals$Mining_Region, test206, test207, test208)) %>%
    filter(test206 == TRUE & test207 == TRUE & test208 == TRUE)
  df <- df %>% select(V1)
  result <- as_tibble(list(Sample = Coins$Sample[[i]], Hits = df), .name_repair = "minimal")

  Hits <- rbind(Hits, result)
}

Hits <- Hits %>%
  unnest(cols = c(Hits))
names(Hits)[2] <- "Mining_Region"
Hits
view(Hits)

```

```
Coins_Hits <- left_join(Hits, Coins, by = "Sample")
```

```
Coins_Hits
```

```
n_distinct(Hits$Sample)
```

```
mining_hits <- masterf_min_excl_TE %>%
```

```
  filter(Mining_Region %in% Hits$Mining_Region)
```

```
mining_hits
```

```
n_groups <- unique(mining_hits$Mining_Region) %>%
```

```
  length()
```

```
n_groups
```

```
seed <- c("#ff0000", "#00ff00", "#0000ff")
```

```
mycolors <- createPalette(n_groups, seed, prefix="S", range = c(20, 70)) %>%
```

```
  unname()
```

```
ell208 <-
```

```
  ggplot(Coins_Hits, mapping = aes(`207Pb/204Pb`, `208Pb/204Pb`)) +
```

```
  geom_point(mapping = aes(color = Mining_Region, shape = Mining_Region), size = 2.5) +
```

```
  scale_color_manual(values = mycolors) +
```

```
  scale_shape_manual(values = c(1:n_groups)) +
```

```
  stat_ellipse(data = mining_hits,
```

```
    mapping = aes(`207Pb/204Pb`, `208Pb/204Pb`,
```

```
    color = mining_hits$Mining_Region),
```

```
    type = "norm", level = (1 - alpha)) +
```

```
  geom_point(data = Coins, mapping = aes(`207Pb/204Pb`, `208Pb/204Pb`), alpha = 0.2) +
```

```
  labs(color = "Mining Region", shape = "Mining Region") +
```

```
  xlab(expression({}^207*"Pb"/"*{}^204*"Pb")) +
```

```
  ylab(expression({}^208*"Pb"/"*{}^204*"Pb")) +
```

```
  xlim(15.6,15.72) +
```

```
  ylim(38.2,39.1) +
```

```
  theme(legend.position = "none",
```

```
    text = element_text(size = 20))
```

```
ell208
```

```
ell206 <-
```

```
  ggplot(Coins_Hits, mapping = aes(`207Pb/204Pb`, `206Pb/204Pb`)) +
```

```
  geom_point(mapping = aes(color = Mining_Region, shape = Mining_Region), size = 2.5) +
```

```
  scale_color_manual(values = mycolors) +
```

```
  scale_shape_manual(values = c(1:n_groups)) +
```

```
  stat_ellipse(data = mining_hits,
```

```
    mapping = aes(`207Pb/204Pb`, `206Pb/204Pb`,
```

```
    color = mining_hits$Mining_Region),
```

```
    type = "norm", level = (1 - alpha)) +
```

```
  geom_point(data = Coins, mapping = aes(`207Pb/204Pb`, `206Pb/204Pb`), alpha = 0.2) +
```

```
  labs(color = "Mining Region", shape = "Mining Region") +
```

```

xlab(expression({}^207*"Pb"/"*{}^204*"Pb")) +
ylab(expression({}^206*"Pb"/"*{}^204*"Pb")) +
xlim(15.6,15.72) +
ylim(18,19) +
theme(text = element_text(size = 20))
ell206

ellarr <- ggarrange(ell206,ell208,
                    ncol = 1, nrow = 2)
ellarr

plot_name <- "ellarr.tiff"                ### choose format
ggsave(plot_name, plot = ellarr,
        width = 52, height = 40, units = "cm",
        device = "tiff", dpi = 600)      ### set width, height, dpi...

## Cluster analysis
# read data
Coins_All <- Path_Coins %>%
  read_excel() %>%
  column_to_rownames("Sample")
view(Coins_All)

Coins_Names <- Path_Coins %>%
  read_excel()
Coins_Names

Coins_Prep <- Coins_All %>%
  select(`206Pb/204Pb`, `207Pb/204Pb`, `208Pb/204Pb`)

Coins_white <- Coins_Prep %>%
  as.matrix() %>%
  whiten()
Coins_white

# clustering
d <- daisy(Coins_white, metric = "euclidean")
cls <- hclust(d, method="ward.D2") # Ward's algorithm

# plot dendrogram
plot_dendr <- function(cls, clusters) {
  dendro <- as.dendrogram(cls)
  par(cex = 0.7, mar = c(10, 4.1, 4.1, 2.1))
  dendro %>%
    plot()
  dendro %>% rect.dendrogram(k = clusters, border = 8, lty = 5,
                           lower_rect = -4.5)
}

```

```

clusters <- 6      ### change nr of clusters

plot_dendr(cls, clusters)

# read h on dendrogram plot
cutcls <- cut(as.dendrogram(cls), h = 5)  ### change h
cutcls

layout(matrix(1:clusters, ncol = 3))
sapply(1:clusters, function(i)
  plot(cutcls$lower[[i]], main = paste0("group ", i)))

# add groups to file
groups <- stack(setNames(Map(labels, cutcls$lower), seq_along(cutcls$lower)))
groups
HierWardCluster <- left_join(Coins_Names, groups, by = c("Sample" = "values"))
view(HierWardCluster)

## Albarède et al. (2020)
# Scatterplot functions
plot_Alba_mixtr <- function(dataset, clusters) {
  ggplot(dataset, mapping = aes(`206Pb/204Pb`/`208Pb/204Pb`, `207Pb/204Pb`/`208Pb/204Pb`))+
    geom_point(mapping = aes(color = ind, shape = ind),
      size = 3) +
    scale_shape_manual(values=c(3,4,7,15:(clusters+11))) +
    labs(color = "", shape = "") +
    xlab(expression({}^206*"Pb"/{}^208*"Pb")) +
    ylab(expression({}^207*"Pb"/{}^208*"Pb")) +
    theme(legend.position = c(.98, .98),
      legend.justification = c("right", "top"),
      axis.title.x = element_text(size = rel(1.5)),
      axis.title.y = element_text(size = rel(1.5)),
      text = element_text(size = 20))
}

plot_Alba_mamu <- function(dataset, clusters) {
  ggplot(dataset, mapping = aes(`Tm (Ma)`, mu))+
    geom_point(mapping = aes(color = ind, shape = ind),
      size = 3) +
    scale_shape_manual(values=c(3,4,7,15:(clusters+11))) +
    labs(color = "", shape = "") +
    labs(x="Model Age (Ma)", y = "μ (U/Pb)") +
    theme(legend.position = "none",
      axis.title.x = element_text(size = rel(1.5)),
      axis.title.y = element_text(size = rel(1.5)),
      text = element_text(size = 20))
}

```



```

plot_Alba_maka <- function(dataset, clusters) {
  ggplot(HierWardCluster, mapping = aes(`Tm (Ma)`, kappa))+
    geom_point(mapping = aes(color = ind, shape = ind),
               size = 3) +
    scale_shape_manual(values=c(3,4,7,15:(clusters+11))) +
    labs(color = "", shape = "") +
    xlab("Model Age (Ma)") +
    ylab(expression(kappa~"(Th/U)")) +
    theme(legend.position = "none",
          axis.title.x = element_text(size = rel(1.5)),
          axis.title.y = element_text(size = rel(1.5)),
          text = element_text(size = 20))
}

```

```

plot_Alba_mamuka <- function(dataset, clusters) {
  ggplot(dataset, mapping = aes(`Tm (Ma)`, kappa*mu))+
    geom_point(mapping = aes(color = ind, shape = ind),
               size = 3) +
    scale_shape_manual(values=c(3,4,7,15:(clusters+11))) +
    labs(color = "", shape = "") +
    xlab("Model Age (Ma)") +
    ylab(expression("μ"*kappa~"(Th/Pb)")) +
    theme(legend.position = "none",
          axis.title.x = element_text(size = rel(1.5)),
          axis.title.y = element_text(size = rel(1.5)),
          text = element_text(size = 20))
}

```

```

plot_Alba_mumuka <- function(dataset, clusters) {
  ggplot(dataset, mapping = aes(mu, kappa*mu))+
    geom_point(mapping = aes(color = ind, shape = ind),
               size = 3) +
    scale_shape_manual(values=c(3,4,7,15:(clusters+11))) +
    labs(color = "", shape = "") +
    xlab("μ (U/Pb)") +
    ylab(expression("μ"*kappa~"(Th/Pb)")) +
    theme(legend.position = "none",
          axis.title.x = element_text(size = rel(1.5)),
          axis.title.y = element_text(size = rel(1.5)))
}

```

```

plot_Alba_mukaka <- function(dataset, clusters) {
  ggplot(dataset, mapping = aes(1/(kappa*mu), 1/kappa))+
    geom_point(mapping = aes(color = ind, shape = ind),
               size = 3) +
    scale_shape_manual(values=c(3,4,7,15:(clusters+11))) +
    labs(color = "", shape = "") +

```

```

xlab(expression("1/μ"*kappa~"(Pb/Th)")) +
ylab(expression("1/μ"*kappa~"(U/Th)")) +
theme(legend.position = "none",
      axis.title.x = element_text(size = rel(1.5)),
      axis.title.y = element_text(size = rel(1.5)))
}

pa1 <- plot_Alba_mixtr(HierWardCluster, clusters)
pa2 <- plot_Alba_mamu(HierWardCluster, clusters)
pa3 <- plot_Alba_maka(HierWardCluster, clusters)
pa4 <- plot_Alba_mamuka(HierWardCluster, clusters)
plot_Alba_mumuka(HierWardCluster, clusters)
plot_Alba_mukaka(HierWardCluster, clusters)

alarr <- ggarrange(pa1, pa2, pa3, pa4,
                  labels = c("a", "b", "c", "d"),
                  font.label = list(size = 25, color = "red"),
                  ncol = 2, nrow = 2)
alarr

plot_name <- "alarr.tiff"                ### choose format
ggsave(plot_name, plot = alarr,
        width = 52, height = 40, units = "cm",
        device = "tiff", dpi = 600)      ### set width, height, dpi...

## KDE method
# Calculate KDEs
masterf_KDE <- masterf_minimum %>%
  group_by(Mining_Region) %>%
  nest() %>%
  mutate(KDE_206 = map(data, ~ density(.$`206Pb/204Pb`, bw = "SJ")),
         KDE_207 = map(data, ~ density(.$`207Pb/204Pb`, bw = "SJ")),
         KDE_208 = map(data, ~ density(.$`208Pb/204Pb`, bw = "SJ"))
  )

print(masterf_KDE, n = Inf)
masterf_KDE$KDE_206

# integrate + plot functions
integrate_prob <- function(low206, high206, low207, high207, low208, high208) {
  masterf_KDE %>%
  mutate(prob_206 = map(KDE_206, possibly(~ integrate.xy(.$x, .$y, low206, high206), 0)),
         prob_207 = map(KDE_207, possibly(~ integrate.xy(.$x, .$y, low207, high207), 0)),
         prob_208 = map(KDE_208, possibly(~ integrate.xy(.$x, .$y, low208, high208), 0))
  ) %>%
  select(Mining_Region, prob_206, prob_207, prob_208) %>%

```

```

  unnest(cols = c(prob_206, prob_207, prob_208))
}

bar_color <- function(x){
  ggplot(x, mapping = aes(x = Mining_Region, y = `relative probability`, fill = variable)) +
    geom_bar(stat = "identity", position = "dodge") +
    xlab("") +
    theme(legend.title = element_blank(),
          legend.key.size = unit(0.2, "cm"),
          legend.position = "top") +
    scale_fill_discrete(labels = c(expression({}^206*"Pb"/"*{}^204*"Pb"),
expression({}^207*"Pb"/"*{}^204*"Pb"), expression({}^208*"Pb"/"*{}^204*"Pb"))) +
    theme(axis.text.x = element_text(size = 8, angle = 90, hjust = 1, vjust = 0.3))
}

# load artefacts
path_art <- ("roman.coinage.xlsx")
artefacts <- path_art %>%
  read_excel() %>%
  select(Sample, low206, high206, low207, high207, low208, high208)
view(artefacts)

# bar chart generator (for loop)
for(i in 1:nrow(artefacts)) {
  x <- integrate_prob(artefacts$low206[[i]], artefacts$high206[[i]],
                      artefacts$low207[[i]], artefacts$high207[[i]],
                      artefacts$low208[[i]], artefacts$high208[[i]])

  file_name <- paste0("prob_", artefacts$Sample[[i]], ".xlsx")
  write_xlsx(x, file_name)

  x_long <- x %>%
    melt(id.vars = "Mining_Region", value.name = "relative probability")

  plot_name <- paste0("prob_", artefacts$Sample[[i]], ".tiff") ### choose format
  bar_color(x_long) + ggtitle(artefacts$Sample[[i]])          ### choose plot function
  ggsave(plot_name, width = 8, height = 5 ,dpi = 200)         ### set width, height, dpi...
}

# Scatterplots kernelgroups
ggplot(Coins_All, mapping = aes(`207Pb/204Pb`, `208Pb/204Pb`))+
  geom_point(mapping = aes(color = factor(group), shape = subgroup),
             size = 3) +
  scale_shape_manual(values=c(1:18,20)) +
  labs(shape = "Subgroup", color = "Group color") +
  xlab(expression({}^207*"Pb"/"*{}^204*"Pb")) +
  ylab(expression({}^208*"Pb"/"*{}^204*"Pb")) +
  theme(legend.box = "horizontal",

```

```

axis.title.x = element_text(size = rel(1.5)),
axis.title.y = element_text(size = rel(1.5)))

ggplot(Coins_All, mapping = aes(`207Pb/204Pb`, `206Pb/204Pb`))+
  geom_point(mapping = aes(color = factor(group), shape = subgroup),
    size = 3) +
  scale_shape_manual(values=c(1:18,20)) +
  labs(shape = "Subgroup", color = "Group color") +
  xlab(expression({}^207*"Pb"/"*{}^204*"Pb")) +
  ylab(expression({}^206*"Pb"/"*{}^204*"Pb")) +
  theme(legend.box = "horizontal",
    axis.title.x = element_text(size = rel(1.5)),
    axis.title.y = element_text(size = rel(1.5)))

# overlap
overlap_file <- path %>%
  excel_sheets() %>%
  set_names() %>%
  map_df(~ read_excel(path = path, sheet = .x,
    col_types = columns), .id = "Mining_Region") %>%
  group_by(Mining_Region) %>%
  filter(n() >= 20)
overlap_file

overlap_206_two <- function(filter1, filter2) {
  x <- overlap_file %>%
    select(Mining_Region, `206Pb/204Pb`) %>%
    filter(grepl(filter1, Mining_Region)| grepl(filter2, Mining_Region))
  print(x)

  y <- split(x$`206Pb/204Pb`, x$Mining_Region)
  print(y)

  overlap <- overlap(y)
  print(overlap)

  z <- overlap$OV %>%
    enframe() %>%
    filter(value >= 0.2)
  print(z)

  overview <- ggplot(x, mapping = aes(x = `206Pb/204Pb`, fill = Mining_Region)) +
    geom_density(alpha = 0.6) +
    scale_x_continuous(limits = c(min(x$`206Pb/204Pb`)-0.15, max(x$`206Pb/204Pb`)+0.15)) +
    xlab(expression({}^206*"Pb"/"*{}^204*"Pb")) +
    labs(fill = "", color = "") +
    theme_bw() +
    theme(legend.position = "bottom", text = element_text(size = 20))

```

```

print(overview)
}

overlap_207_two <- function(filter1, filter2) {
  x <- overlap_file %>%
    select(Mining_Region, `207Pb/204Pb`) %>%
    filter(grepl(filter1, Mining_Region)| grepl(filter2, Mining_Region))
  print(x)

  y <- split(x$`207Pb/204Pb`, x$Mining_Region)
  print(y)

  overlap <- overlap(y)
  print(overlap)

  z <- overlap$OV %>%
    enframe() %>%
    filter(value >= 0.2)
  print(z)

  overview <- ggplot(x, mapping = aes(x = `207Pb/204Pb`, fill = Mining_Region)) +
    geom_density(alpha = 0.6) +
    scale_x_continuous(limits = c(min(x$`207Pb/204Pb`)-0.15, max(x$`207Pb/204Pb`)+0.15)) +
    xlab(expression({}^207*"Pb"/"*{}^204*"Pb")) +
    labs(fill = "", color = "") +
    theme_bw() +
    theme(legend.position = "bottom", text = element_text(size = 20))

  print(overview)
}

overlap_208_two <- function(filter1, filter2) {
  x <- overlap_file %>%
    select(Mining_Region, `208Pb/204Pb`) %>%
    filter(grepl(filter1, Mining_Region)| grepl(filter2, Mining_Region))
  print(x)

  y <- split(x$`208Pb/204Pb`, x$Mining_Region)
  print(y)

  overlap <- overlap(y)
  print(overlap)

  z <- overlap$OV %>%
    enframe() %>%
    filter(value >= 0.2)
  print(z)

```

```

overview <- ggplot(x, mapping = aes(x = `208Pb/204Pb`, fill = Mining_Region)) +
  geom_density(alpha = 0.6) +
  scale_x_continuous(limits = c(min(x$`208Pb/204Pb`)-0.15, max(x$`208Pb/204Pb`)+0.15)) +
  xlab(expression({}^208*"Pb"/"*{}^204*"Pb")) +
  labs(fill = "", color = "") +
  theme_bw() +
  theme(legend.position = "bottom", text = element_text(size = 20))

print(overview)
}

```

```

overlap_206_three <- function(filter1, filter2, filter3) {
  x <- overlap_file %>%
    select(Mining_Region, `206Pb/204Pb`) %>%
    filter(grepl(filter1, Mining_Region)| grepl(filter2, Mining_Region)
           |grepl(filter3, Mining_Region))
  print(x)
}

```

```

y <- split(x$`206Pb/204Pb`, x$Mining_Region)
print(y)

```

```

overlap <- overlap(y)
print(overlap)

```

```

z <- overlap$OV %>%
  enframe() %>%
  filter(value >= 0.2)
print(z)

```

```

facet <- final.plot(y, overlap$OV) +
  theme_bw() +
  scale_x_continuous(limits = c(min(x$`206Pb/204Pb`)-0.15, max(x$`206Pb/204Pb`)+0.15)) +
  xlab(expression({}^206*"Pb"/"*{}^204*"Pb")) +
  labs(fill = "", color = "") +
  theme(legend.position = "bottom", text = element_text(size = 20))

print(facet)
}

```

```

overlap_207_three <- function(filter1, filter2, filter3) {
  x <- overlap_file %>%
    select(Mining_Region, `207Pb/204Pb`) %>%
    filter(grepl(filter1, Mining_Region)| grepl(filter2, Mining_Region)
           |grepl(filter3, Mining_Region))
  print(x)
}

```

```

y <- split(x$`207Pb/204Pb`, x$Mining_Region)

```

```

print(y)

overlap <- overlap(y)
print(overlap)

z <- overlap$OV %>%
  enframe() %>%
  filter(value >= 0.2)
print(z)

facet <- final.plot(y, overlap$OV) +
  theme_bw() +
  scale_x_continuous(limits = c(min(x$`207Pb/204Pb`)-0.15, max(x$`207Pb/204Pb`)+0.15)) +
  xlab(expression({}^207*{}Pb/{}*{}^204*{}Pb")) +
  labs(fill = "", color = "") +
  theme(legend.position = "bottom", text = element_text(size = 20))

print(facet)
}

overlap_208_three <- function(filter1, filter2, filter3) {
  x <- overlap_file %>%
    select(Mining_Region, `208Pb/204Pb`) %>%
    filter(grepl(filter1, Mining_Region) | grepl(filter2, Mining_Region)
           | grepl(filter3, Mining_Region))
  print(x)

  y <- split(x$`208Pb/204Pb`, x$Mining_Region)
  print(y)

  overlap <- overlap(y)
  print(overlap)

  z <- overlap$OV %>%
    enframe() %>%
    filter(value >= 0.2)
  print(z)

  facet <- final.plot(y, overlap$OV) +
    theme_bw() +
    scale_x_continuous(limits = c(min(x$`208Pb/204Pb`)-0.15, max(x$`208Pb/204Pb`)+0.15)) +
    xlab(expression({}^208*{}Pb/{}*{}^204*{}Pb")) +
    labs(fill = "", color = "") +
    theme(legend.position = "bottom", text = element_text(size = 20))

  print(facet)
}

```

```

o1 <- overlap_206_three("Chalkidiki", "Thasos", "Laurion")
o2 <- overlap_207_three("Chalkidiki", "Thasos", "Laurion")
o3 <- overlap_208_three("Chalkidiki", "Thasos", "Laurion")

ovarr <- ggarrange(o1, o2, o3,
  labels = c("a", "b", "c"),
  font.label = list(size = 25, color = "red"),
  common.legend = TRUE, legend = "bottom",
  ncol = 1, nrow = 3)
ovarr

plot_name <- "ovarr.tiff"          ### choose format
ggsave(plot_name, plot = ovarr,
  width = 52, height = 60, units = "cm",
  device = "tiff", dpi = 600, bg = "white")    ### set width, height, dpi...

o4 <- overlap_206_two("Burgas", "Rhodope")
o5 <- overlap_207_two("Burgas", "Rhodope")
o6 <- overlap_208_two("Burgas", "Rhodope")

ovarr2 <- ggarrange(o4, o5, o6,
  labels = c("a", "b", "c"),
  font.label = list(size = 25, color = "red"),
  common.legend = TRUE, legend = "bottom",
  ncol = 1, nrow = 3)
ovarr2

plot_name <- "ovarr2.tiff"        ### choose format
ggsave(plot_name, plot = ovarr2,
  width = 52, height = 60, units = "cm",
  device = "tiff", dpi = 600, bg = "white")    ### set width, height, dpi...

overlap_206_nine <- function(filter1, filter2, filter3, filter4, filter5,
  filter6, filter7, filter8, filter9) {
  x <- overlap_file %>%
    select(Mining_Region, `206Pb/204Pb`) %>%
    filter(grepl(filter1, Mining_Region) | grepl(filter2, Mining_Region)
      | grepl(filter3, Mining_Region) | grepl(filter4, Mining_Region)
      | grepl(filter5, Mining_Region) | grepl(filter6, Mining_Region)
      | grepl(filter7, Mining_Region) | grepl(filter8, Mining_Region)
      | grepl(filter9, Mining_Region))
  print(x)

  y <- split(x$`206Pb/204Pb`, x$Mining_Region)
  print(y)

  overlap <- overlap(y)
  print(overlap)

```



```

z <- overlap$OVPairs%>%
  enframe() %>%
  filter(value >= 0.2)
print(z)

```

```

overview <- ggplot(x, mapping = aes(x = `206Pb/204Pb`, fill = Mining_Region)) +
  geom_density(alpha = 0.6) +
  scale_x_continuous(limits = c(min(x$`206Pb/204Pb`)-0.15, max(x$`206Pb/204Pb`)+0.15)) +
  xlab(expression({}^206*"Pb"/"*{}^204*"Pb")) +
  labs(fill = "", color = "") +
  theme_bw() +
  theme(legend.position = "bottom", text = element_text(size = 20))

print(overview)
}

```

```

overlap_207_nine <- function(filter1, filter2, filter3, filter4, filter5,
                             filter6, filter7, filter8, filter9) {
  x <- overlap_file %>%
    select(Mining_Region, `207Pb/204Pb`) %>%
    filter(grepl(filter1, Mining_Region)| grepl(filter2, Mining_Region)
           | grepl(filter3, Mining_Region)| grepl(filter4, Mining_Region)
           | grepl(filter5, Mining_Region)| grepl(filter6, Mining_Region)
           | grepl(filter7, Mining_Region)| grepl(filter8, Mining_Region)
           | grepl(filter9, Mining_Region))
  print(x)
}

```

```

y <- split(x$`207Pb/204Pb`, x$Mining_Region)
print(y)

```

```

overlap <- overlap(y)
print(overlap)

```

```

z <- overlap$OVPairs%>%
  enframe() %>%
  filter(value >= 0.2)
print(z)

```

```

overview <- ggplot(x, mapping = aes(x = `207Pb/204Pb`, fill = Mining_Region)) +
  geom_density(alpha = 0.6) +
  scale_x_continuous(limits = c(min(x$`207Pb/204Pb`)-0.15, max(x$`207Pb/204Pb`)+0.15)) +
  xlab(expression({}^207*"Pb"/"*{}^204*"Pb")) +
  labs(fill = "", color = "") +
  theme_bw() +
  theme(legend.position = "bottom", text = element_text(size = 20))

print(overview)

```

```
}
```

```
overlap_208_nine <- function(filter1, filter2, filter3, filter4, filter5,  
                             filter6, filter7, filter8, filter9) {
```

```
  x <- overlap_file %>%
```

```
    select(Mining_Region, `208Pb/204Pb`) %>%
```

```
    filter(grepl(filter1, Mining_Region)|grepl(filter2, Mining_Region)
```

```
           |grepl(filter3, Mining_Region)|grepl(filter4, Mining_Region)
```

```
           |grepl(filter5, Mining_Region)|grepl(filter6, Mining_Region)
```

```
           |grepl(filter7, Mining_Region)|grepl(filter8, Mining_Region)
```

```
           |grepl(filter9, Mining_Region))
```

```
  print(x)
```

```
  y <- split(x$`208Pb/204Pb`, x$Mining_Region)
```

```
  print(y)
```

```
  overlap <- overlap(y)
```

```
  print(overlap)
```

```
  z <- overlap$OVPairs%>%
```

```
    enframe() %>%
```

```
    filter(value >= 0.2)
```

```
  print(z)
```

```
  overview <- ggplot(x, mapping = aes(x = `208Pb/204Pb`, fill = Mining_Region)) +
```

```
    geom_density(alpha = 0.6) +
```

```
    scale_x_continuous(limits = c(min(x$`208Pb/204Pb`)-0.15, max(x$`208Pb/204Pb`)+0.15)) +
```

```
    xlab(expression({}^208*"Pb"/{}^204*"Pb")) +
```

```
    labs(fill = "", color = "") +
```

```
    theme_bw() +
```

```
    theme(legend.position = "bottom", text = element_text(size = 20))
```

```
  print(overview)
```

```
}
```

```
o7 <- overlap_206_nine("Almeria", "Murcia", "Balears", "Siphnos", "Thasos",
```

```
                      "EastRhodope", "CentralRhodope", "Türkiye-West", "CentralTaurus")
```

```
o8 <- overlap_207_nine("Almeria", "Murcia", "Balears", "Siphnos", "Thasos",
```

```
                      "EastRhodope", "CentralRhodope", "Türkiye-West", "CentralTaurus")
```

```
o9 <- overlap_208_nine("Almeria", "Murcia", "Balears", "Siphnos", "Thasos",
```

```
                      "EastRhodope", "CentralRhodope", "Türkiye-West", "CentralTaurus")
```

```
ovarr3 <- ggarrange(o7, o8, o9,
```

```
                  labels = c("a", "b", "c"),
```

```
                  font.label = list(size = 25, color = "red"),
```

```
                  common.legend = TRUE, legend = "bottom",
```

```
                  ncol = 1, nrow = 3)
```

```
ovarr3
```

```

plot_name <- "ovarr3.tiff"          ### choose format
ggsave(plot_name, plot = ovarr3,
        width = 52, height = 60, units = "cm",
        device = "tiff", dpi = 600, bg = "white")    ### set width, height, dpi...

```

```

o10 <- overlap_206_two("Balears", "Rhodope")
o11 <- overlap_207_two("Balears", "Rhodope")
o12 <- overlap_208_two("Balears", "Rhodope")

```

```

ovarr4 <- ggarrange(o10, o11, o12,
                    labels = c("a", "b", "c"),
                    font.label = list(size = 25, color = "red"),
                    common.legend = TRUE, legend = "bottom",
                    ncol = 1, nrow = 3)

```

ovarr4

```

plot_name <- "ovarr4.tiff"          ### choose format
ggsave(plot_name, plot = ovarr4,
        width = 52, height = 60, units = "cm",
        device = "tiff", dpi = 600, bg = "white")    ### set width, height, dpi...

```

## Comparison

```

c1 <-
  ggplot(Coins_All, mapping = aes(`^206Pb/204Pb`, `^208Pb/204Pb`, `^207Pb/204Pb`, `^208Pb/204Pb`))+
  geom_point(mapping = aes(color = factor(group), shape = subgroup),
             size = 3) +
  scale_color_discrete(labels = c("1 - Spain", "2 - NW Europe", "3 - Greece",
                                   "4 - Bulgaria", "5 - Overlap?", "6 - No clear signature")) +
  scale_shape_manual(values = c(1:18, 20)) +
  labs(color = "Group", shape = "Subgroup") +
  xlab(expression({}^206*"Pb"/"*{}^208*"Pb")) +
  ylab(expression({}^207*"Pb"/"*{}^208*"Pb")) +
  theme(legend.box = "horizontal",
        legend.position = "bottom",
        axis.title.x = element_text(size = rel(1.5)),
        axis.title.y = element_text(size = rel(1.5)),
        text = element_text(size = 20)) +
  guides(color = guide_legend(order = 1, ncol = 1),
         shape = guide_legend(order = 2, ncol = 4))

```

```

c2 <-
  ggplot(Coins_All, mapping = aes(`Tm (Ma)`, mu))+
  geom_point(mapping = aes(color = factor(group), shape = subgroup),
             size = 3) +
  scale_color_discrete(labels = c("1 - Spain", "2 - NW Europe", "3 - Greece",
                                   "4 - Bulgaria", "5 - Overlap?", "6 - No clear signature")) +

```

```

scale_shape_manual(values=c(1:18,20)) +
labs(color = "Group", shape = "Subgroup") +
labs(x = "Model Age (Ma)", y = " $\mu$  (U/Pb)") +
theme(legend.box = "horizontal",
      legend.position = "bottom",
      axis.title.x = element_text(size = rel(1.5)),
      axis.title.y = element_text(size = rel(1.5)),
      text = element_text(size = 20)) +
guides(color = guide_legend(order = 1, ncol = 1),
      shape = guide_legend(order = 2, ncol = 4))

```

```

c3 <-
ggplot(Coins_All, mapping = aes(`Tm (Ma)`, kappa))+
geom_point(mapping = aes(color = factor(group), shape = subgroup),
           size = 3) +
scale_color_discrete(labels = c("1 - Spain", "2 - NW Europe", "3 - Greece",
                                "4 - Bulgaria", "5 - Overlap?", "6 - No clear signature")) +
scale_shape_manual(values=c(1:18,20)) +
labs(color = "Group", shape = "Subgroup") +
xlab("Model Age (Ma)") +
ylab(expression(kappa~"(Th/U)")) +
theme(legend.box = "horizontal",
      legend.position = "bottom",
      axis.title.x = element_text(size = rel(1.5)),
      axis.title.y = element_text(size = rel(1.5)),
      text = element_text(size = 20)) +
guides(color = guide_legend(order = 1, ncol = 1),
      shape = guide_legend(order = 2, ncol = 4))

```

```

c4 <-
ggplot(Coins_All, mapping = aes(`Tm (Ma)`, mu*kappa))+
geom_point(mapping = aes(color = factor(group), shape = subgroup),
           size = 3) +
scale_color_discrete(labels = c("1 - Spain", "2 - NW Europe", "3 - Greece",
                                "4 - Bulgaria", "5 - Overlap?", "6 - No clear signature")) +
scale_shape_manual(values=c(1:18,20)) +
labs(color = "Group", shape = "Subgroup") +
xlab("Model Age (Ma)") +
ylab(expression(" $\mu$ *kappa~"(Th/Pb)")) +
theme(legend.box = "horizontal",
      legend.position = "bottom",
      axis.title.x = element_text(size = rel(1.5)),
      axis.title.y = element_text(size = rel(1.5)),
      text = element_text(size = 20)) +
guides(color = guide_legend(order = 1, ncol = 1),
      shape = guide_legend(order = 2, ncol = 4))

```

```

comparr <- ggarrange(c1, c2, c3, c4,

```

```
      labels = c("a", "b", "c", "d"),
      font.label = list(size = 25, color = "red"),
      common.legend = TRUE, legend = "bottom",
      ncol = 2, nrow = 2)
comparr

plot_name <- "comparr.tiff"          ### choose format
ggsave(plot_name, plot = comparr,
        width = 52, height = 40, units = "cm",
        device = "tiff", dpi = 600, bg = "white")  ### set width, height, dpi...
```

### Appendix 3: Scatterplots faceted per region, grey coins and colored ores

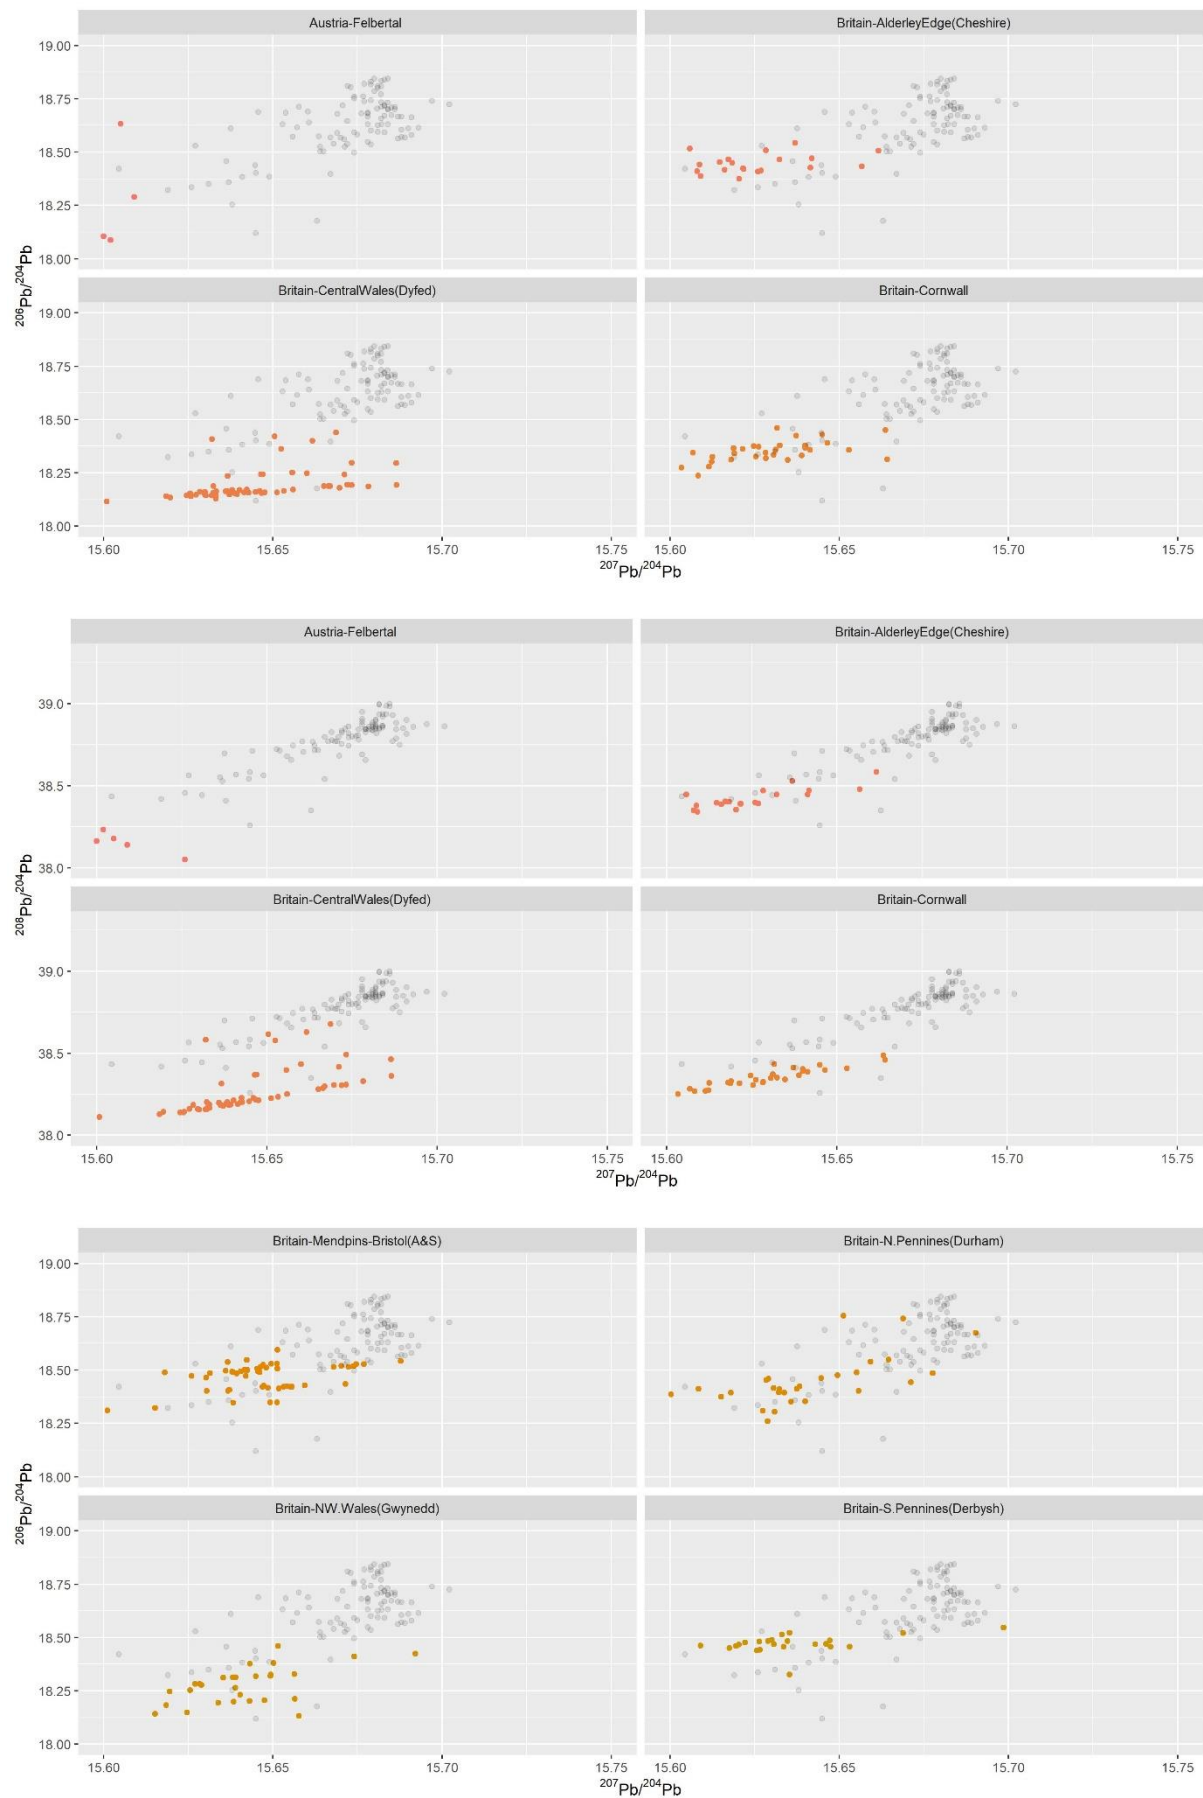

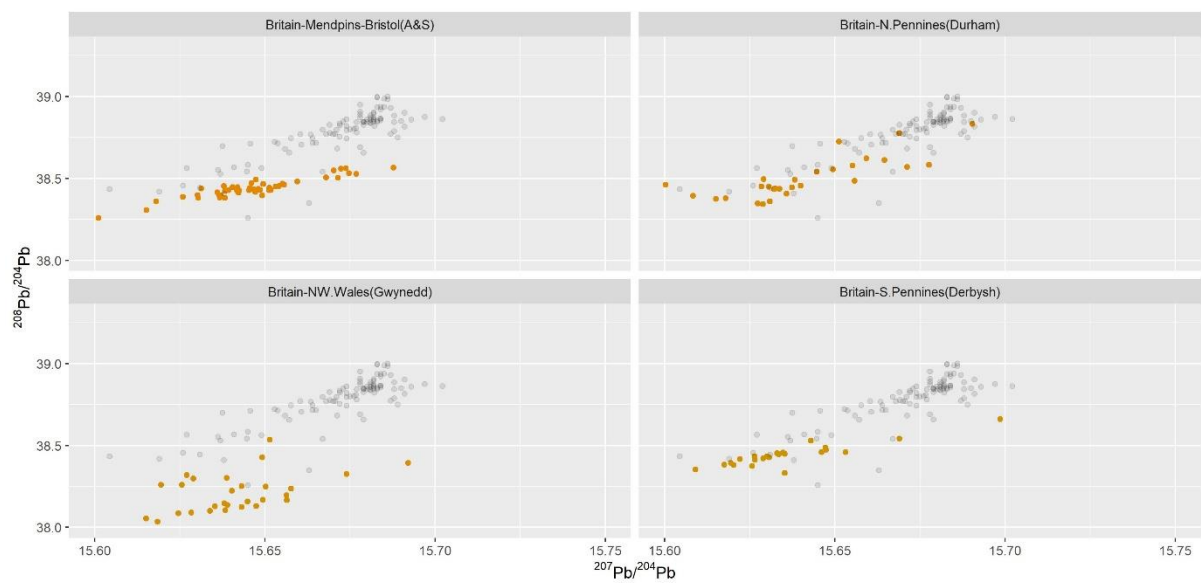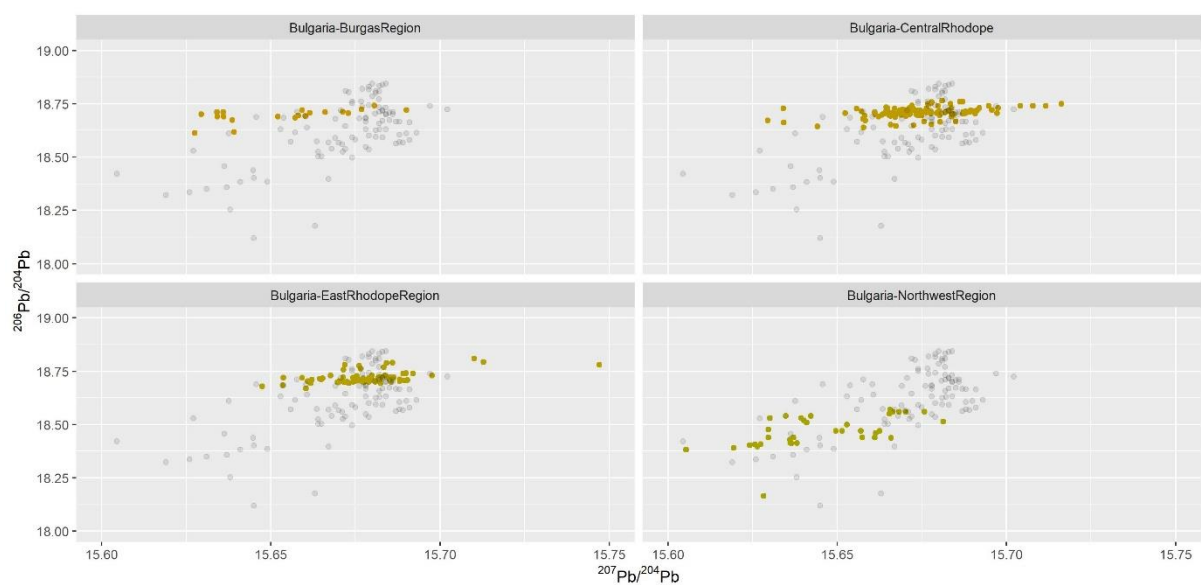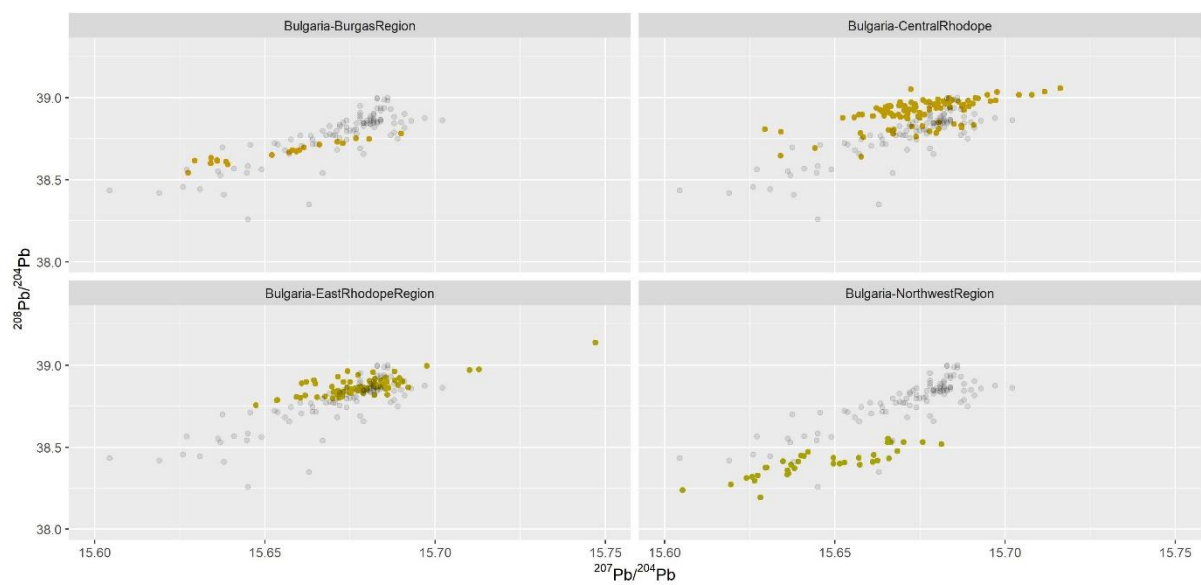

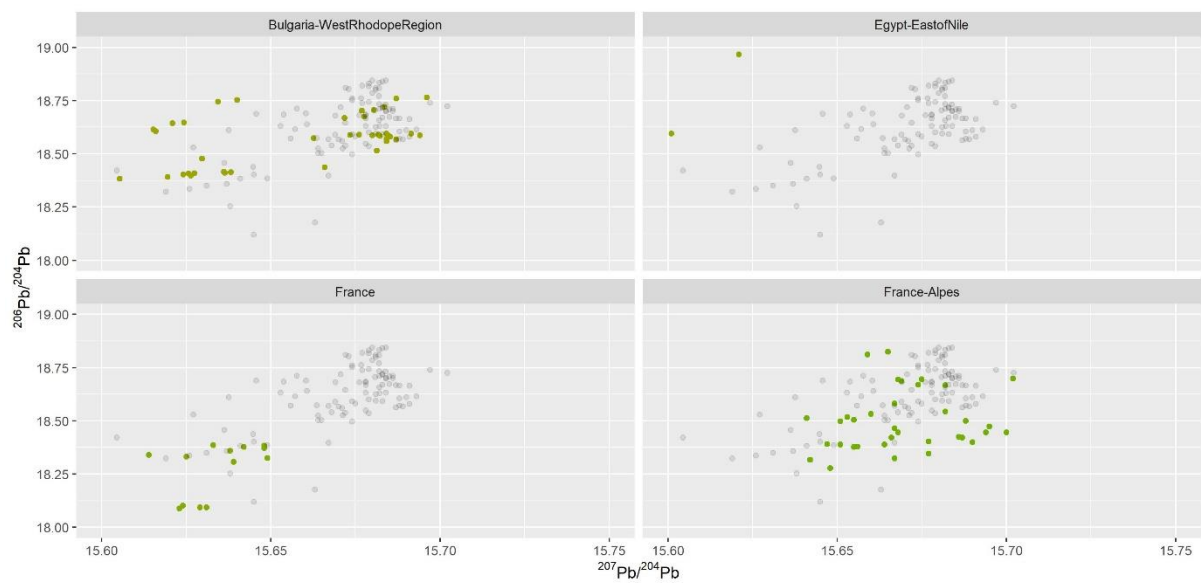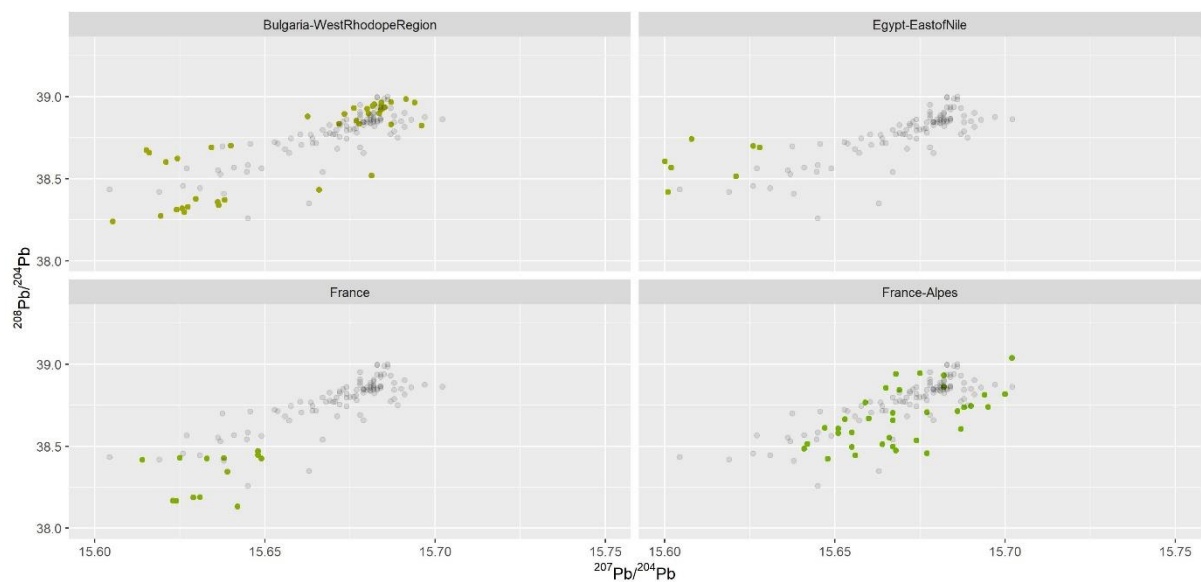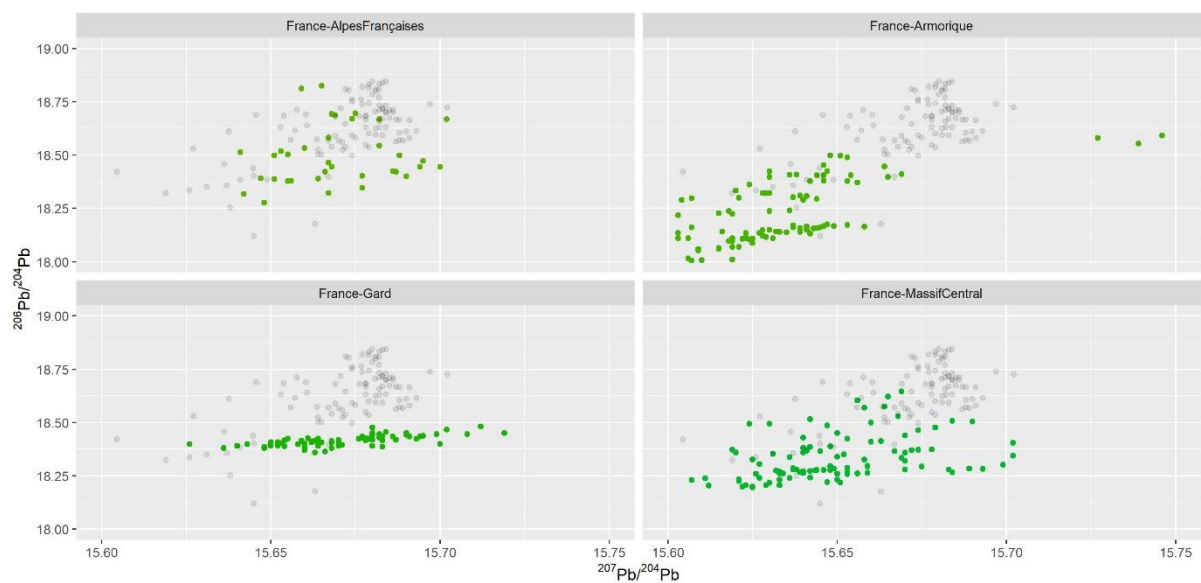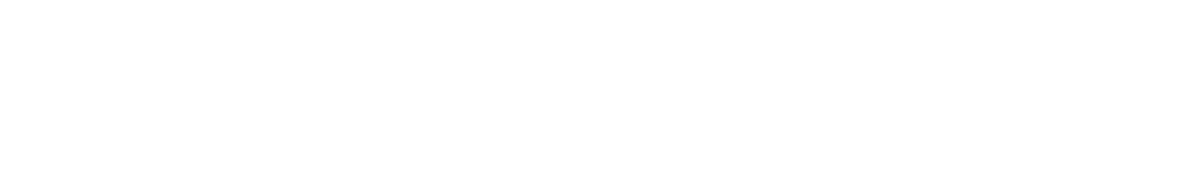



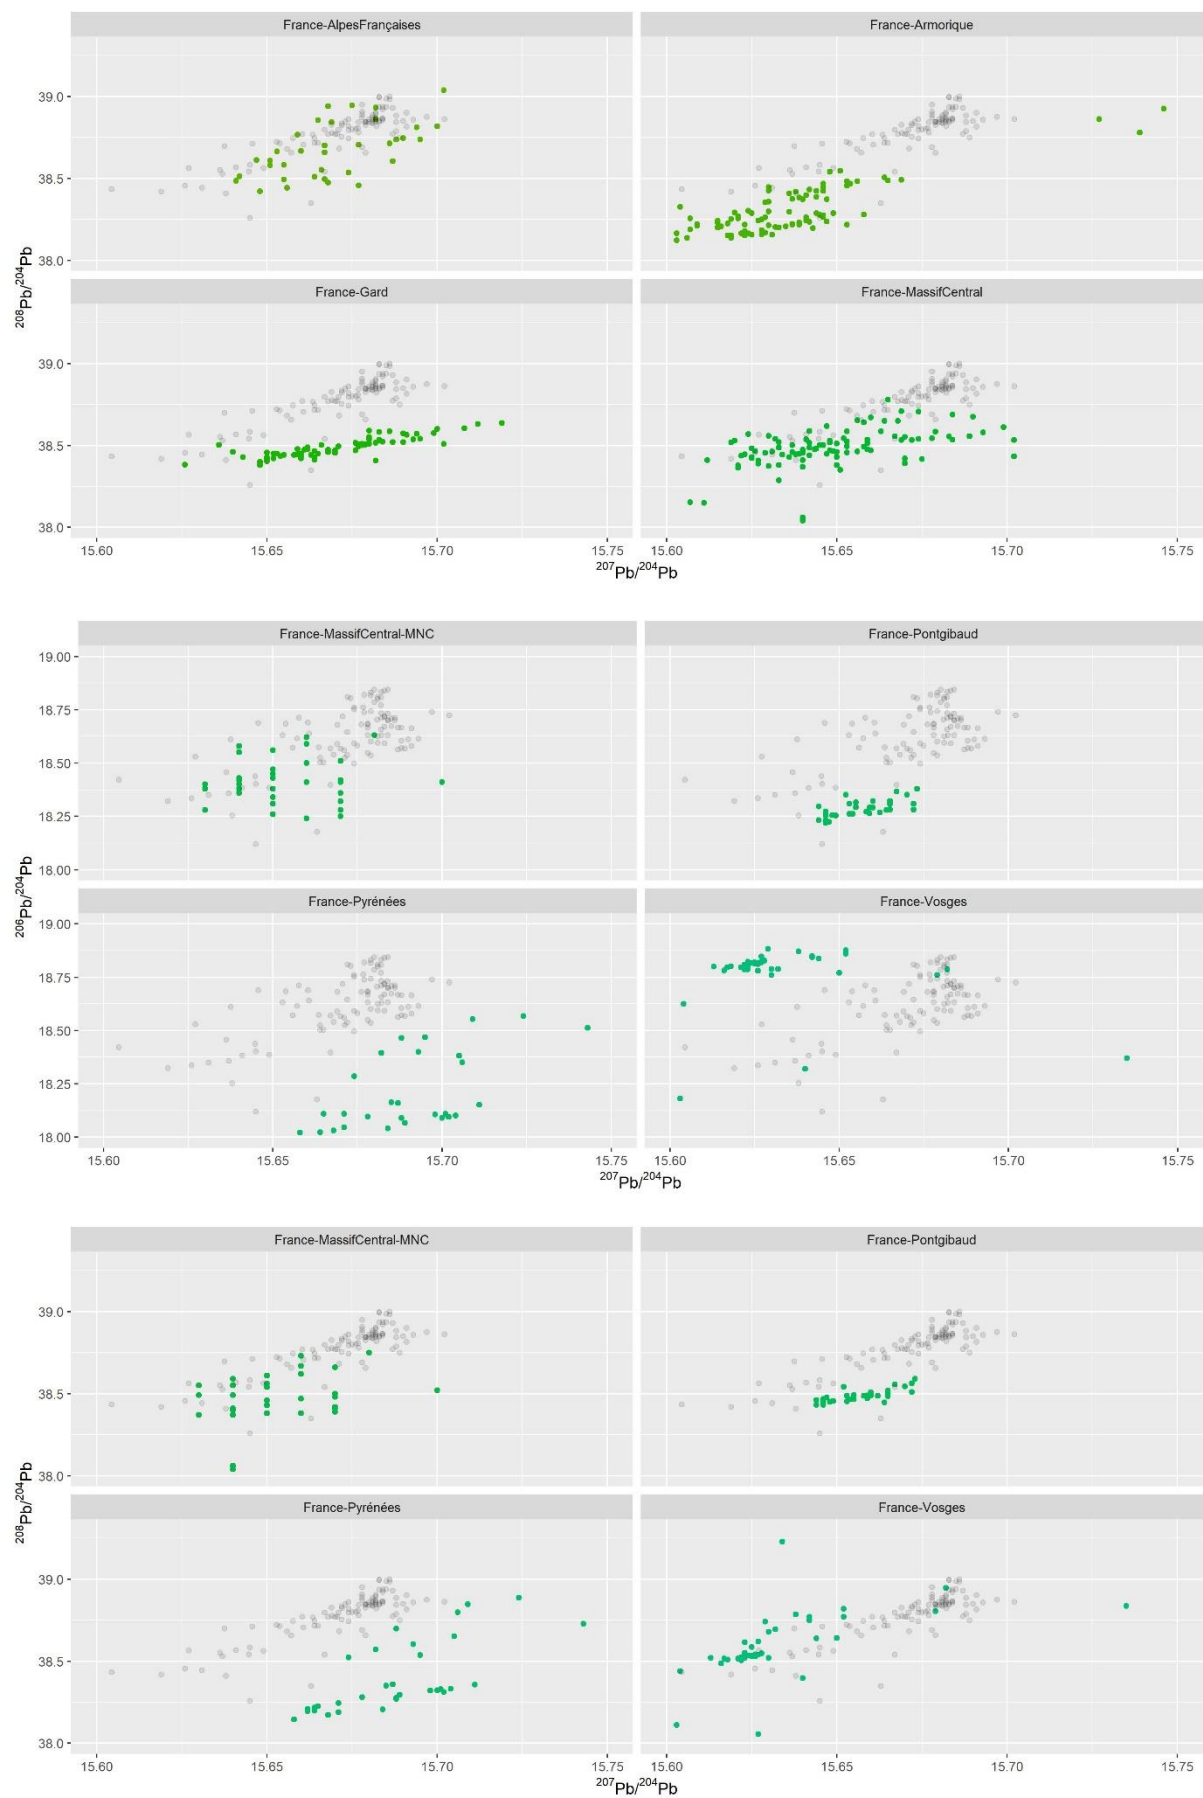

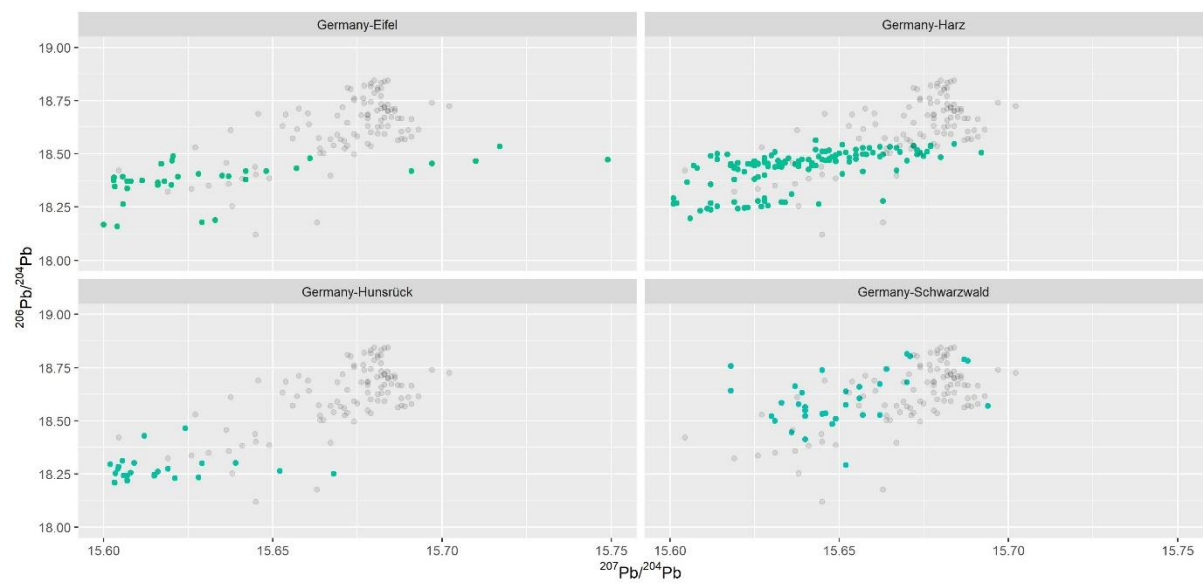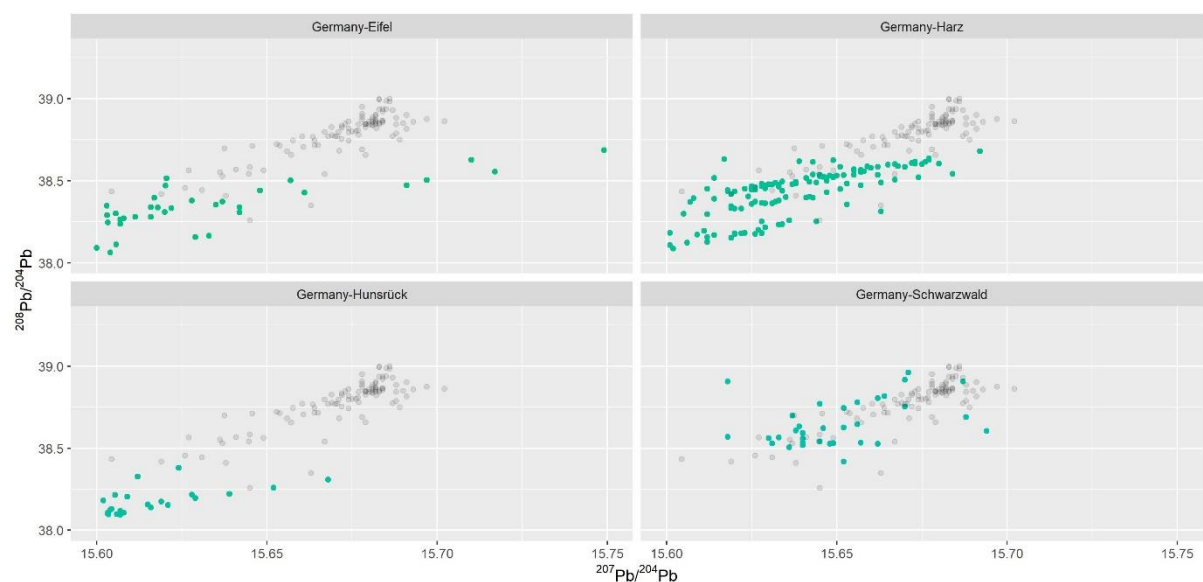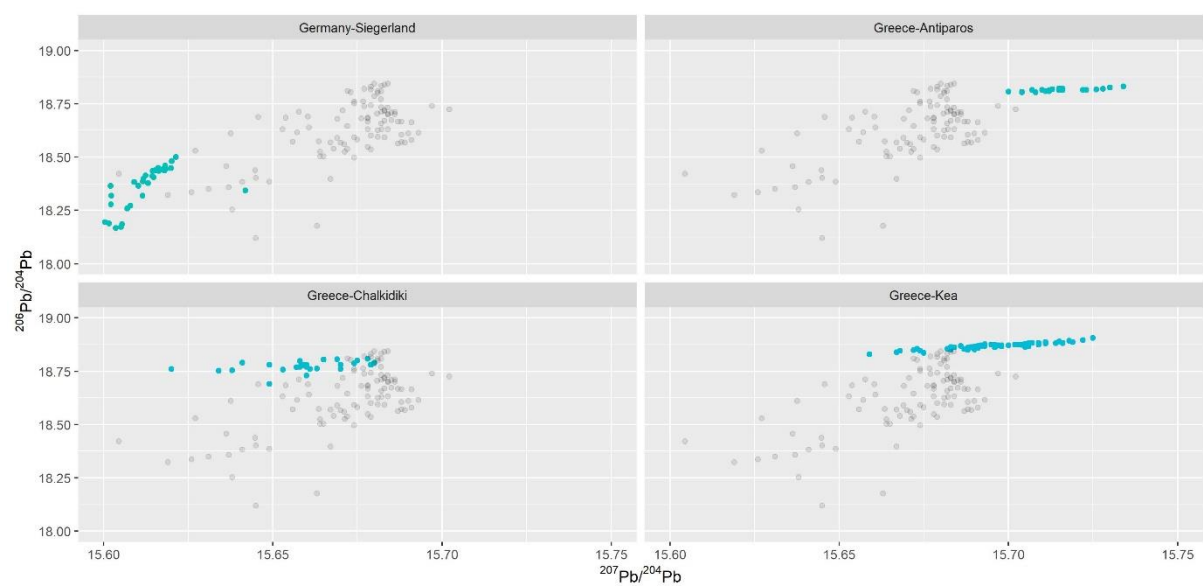

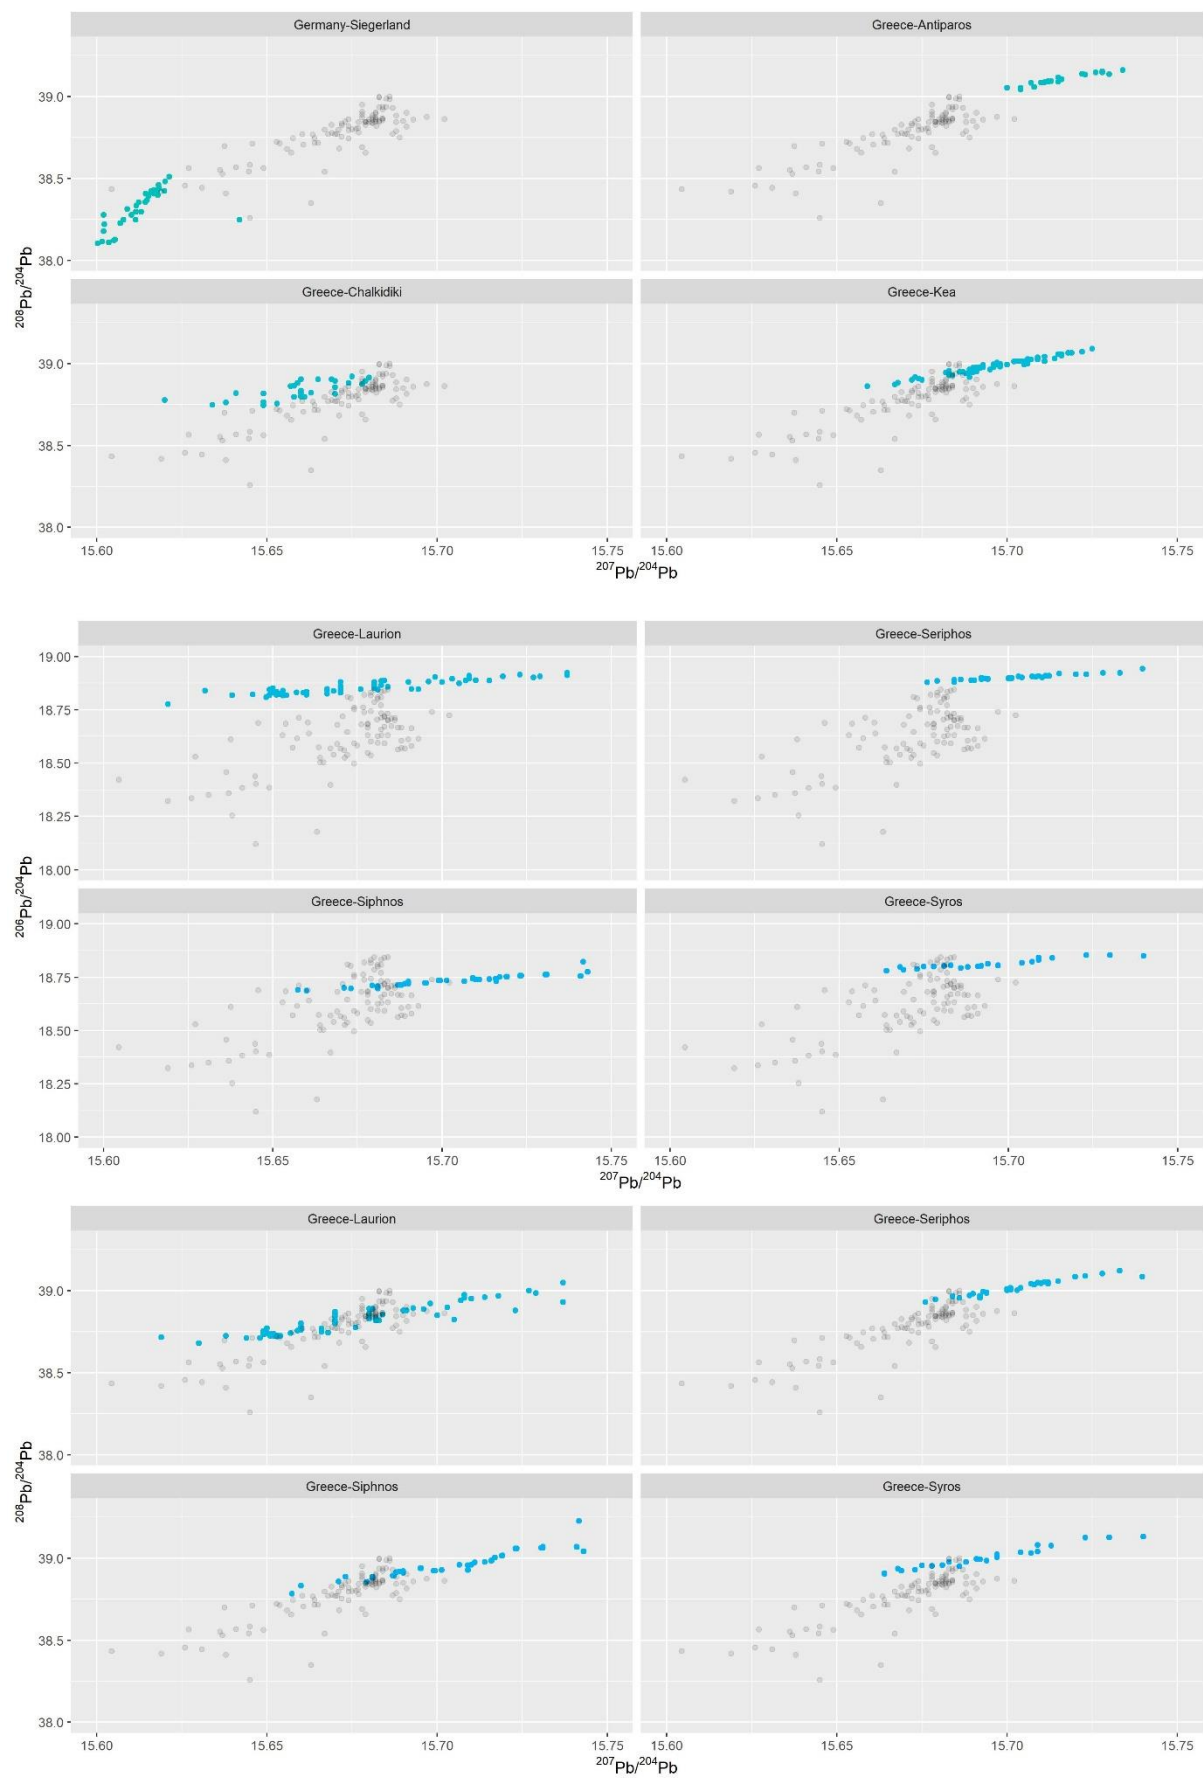

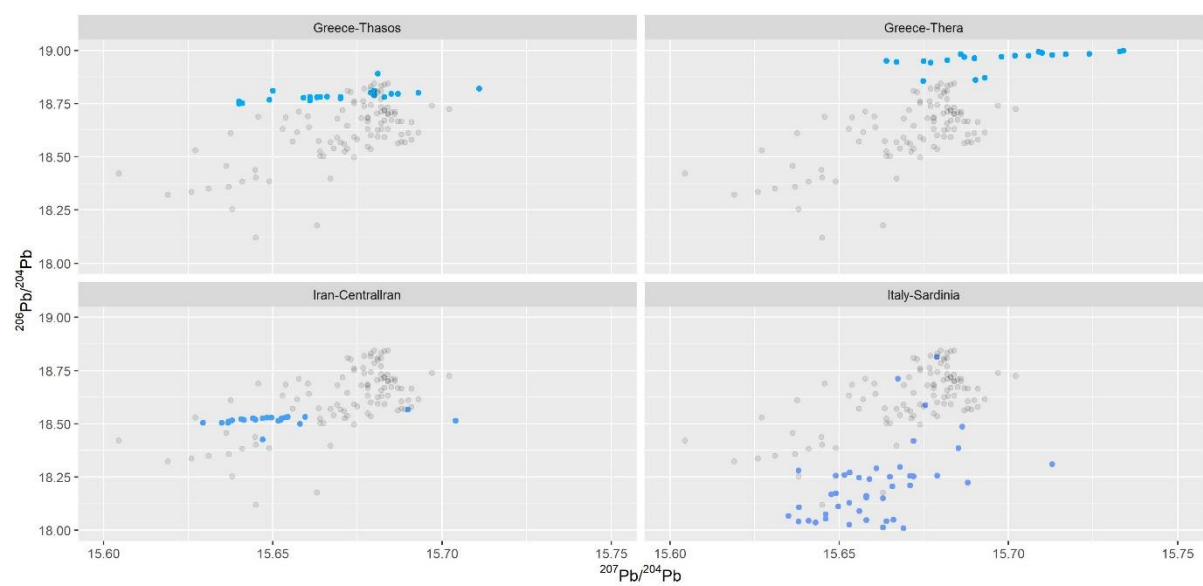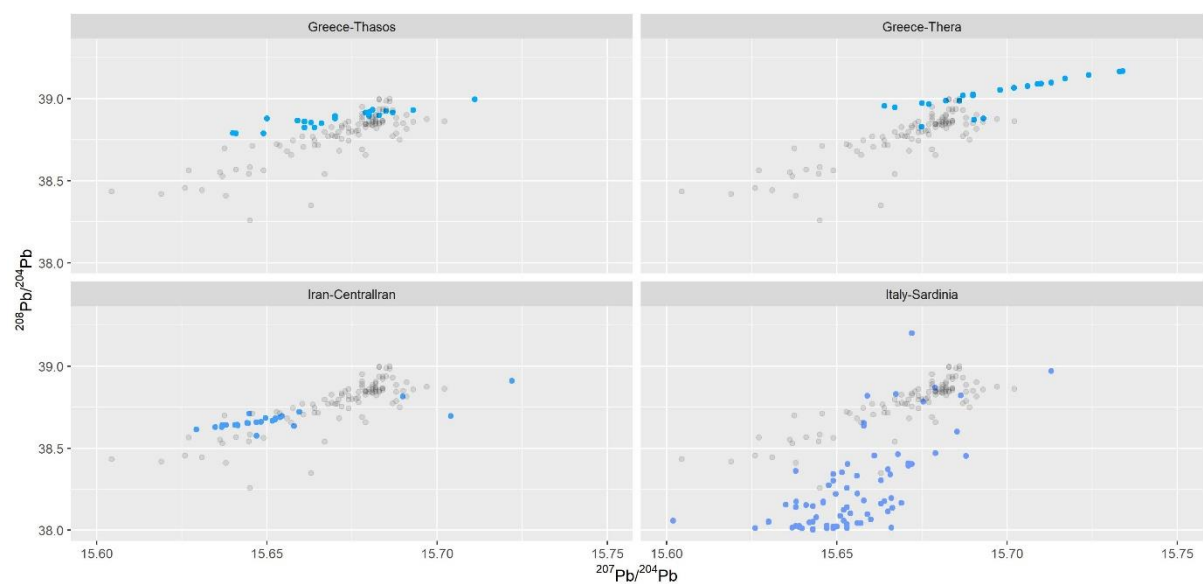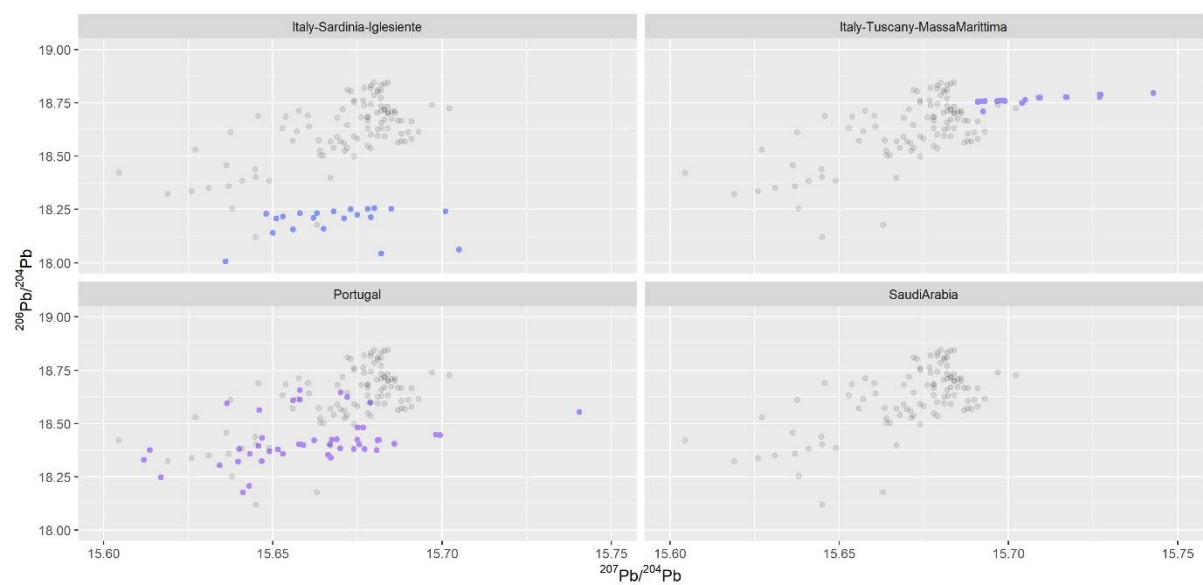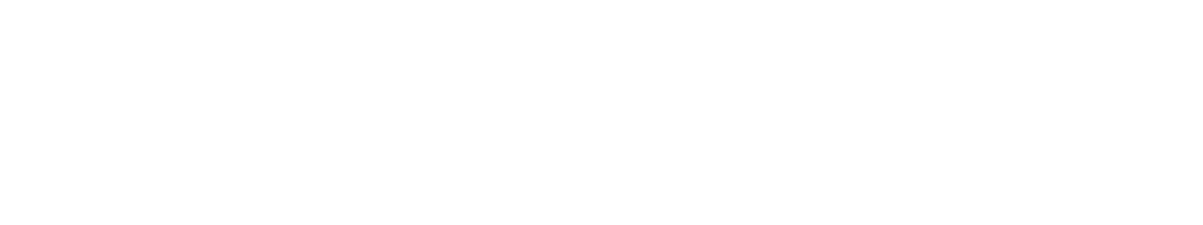

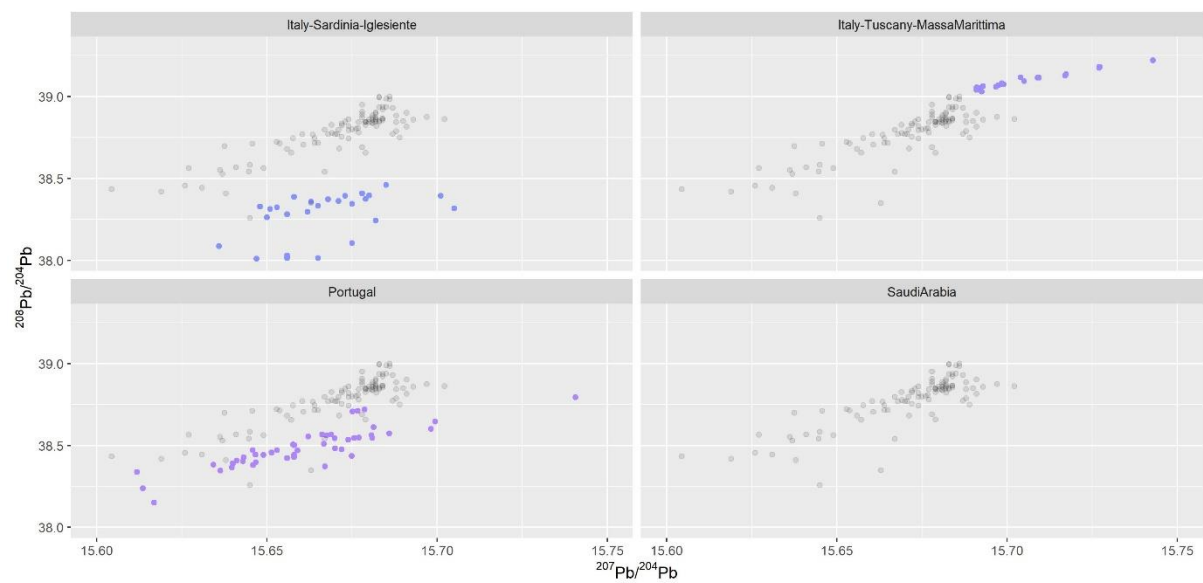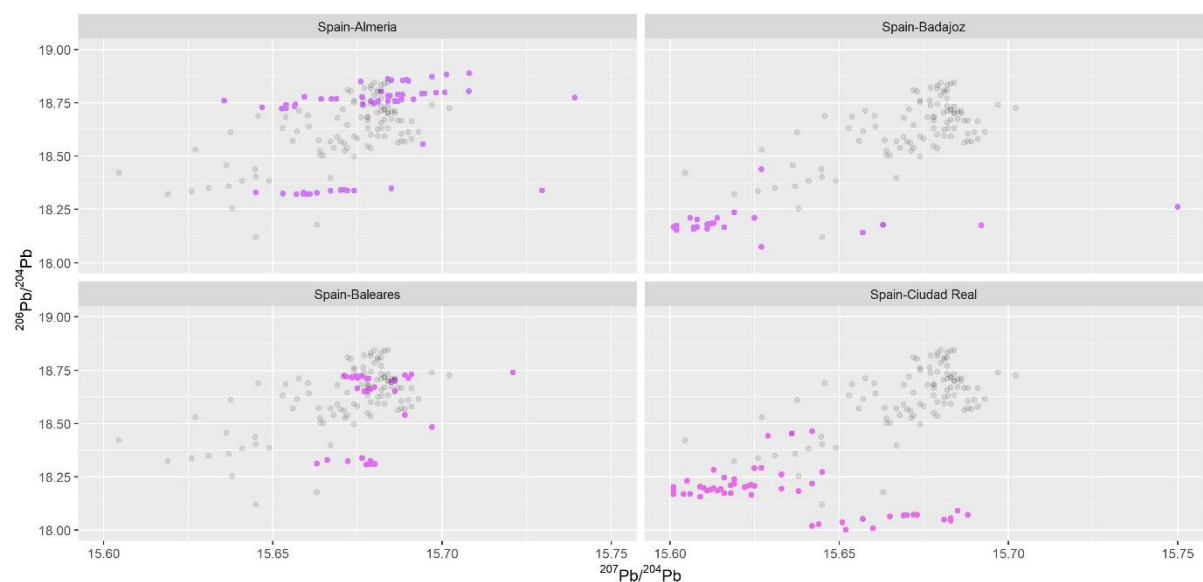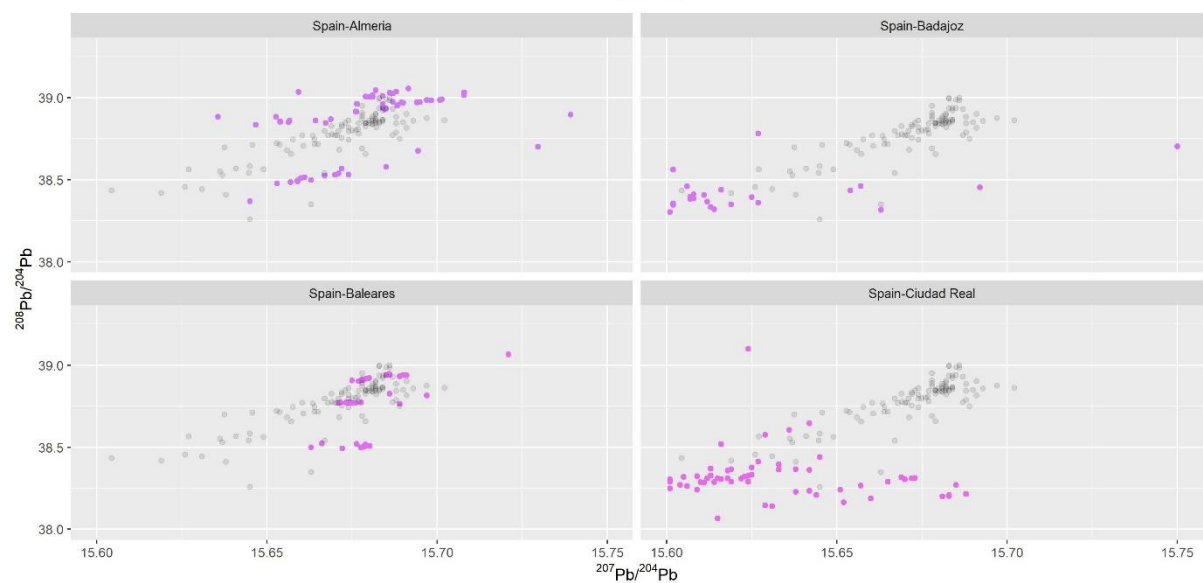

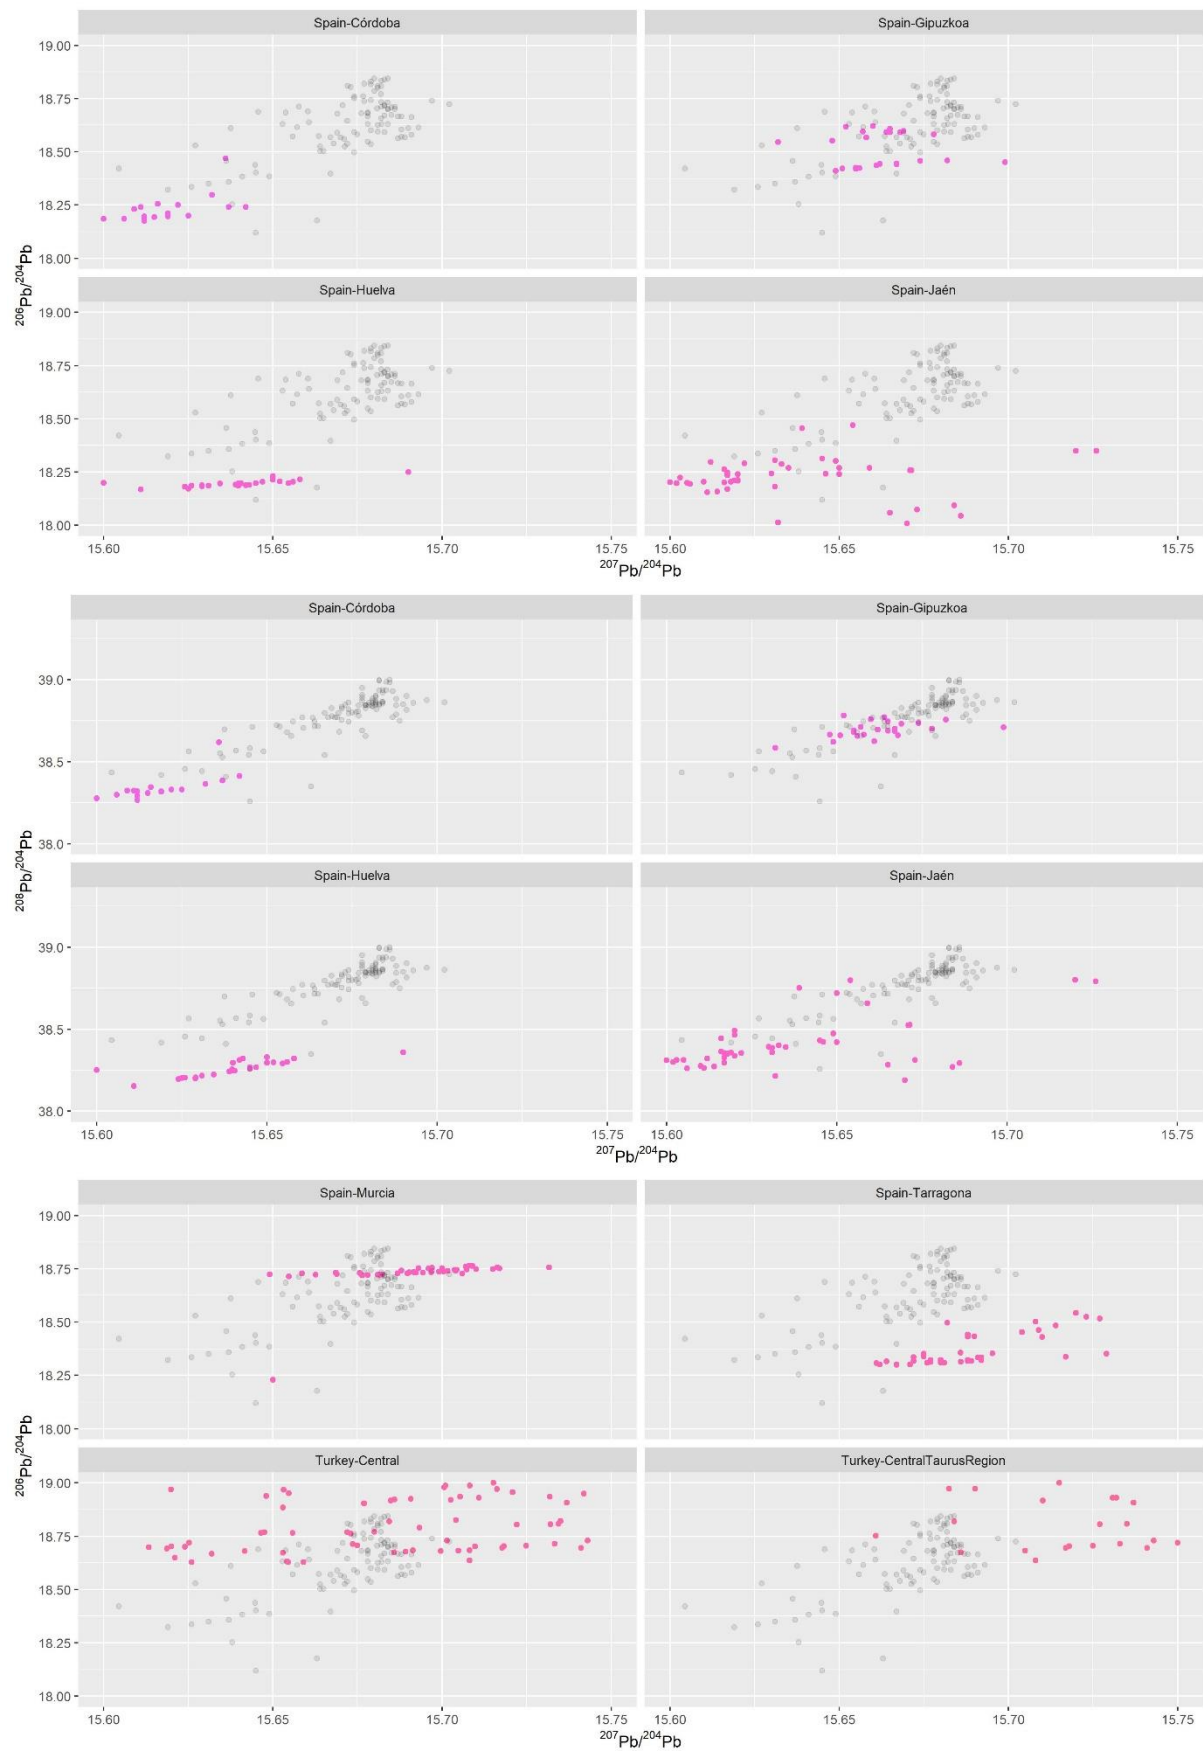

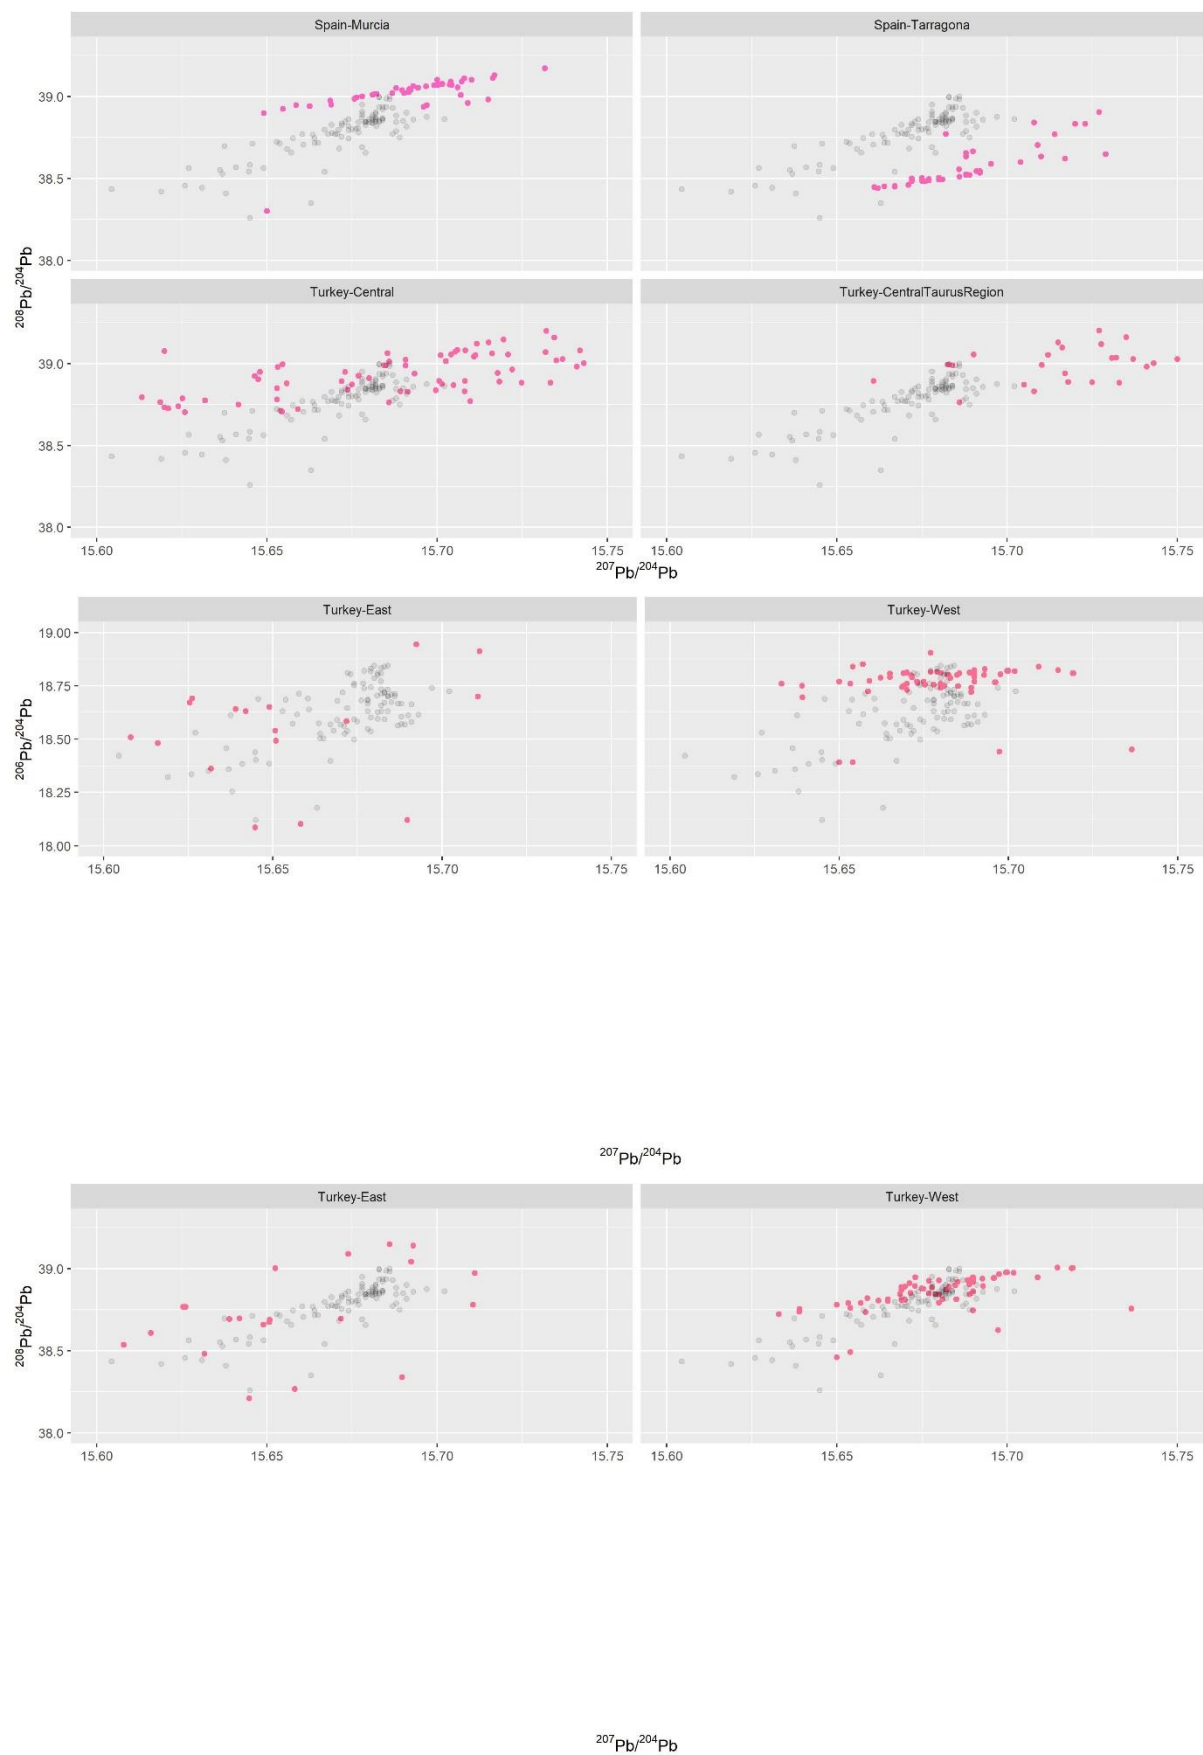

Appendix 4: Scatterplots faceted per region and per coin, black coins and colored ores



Sample 1-Denarius-44-5

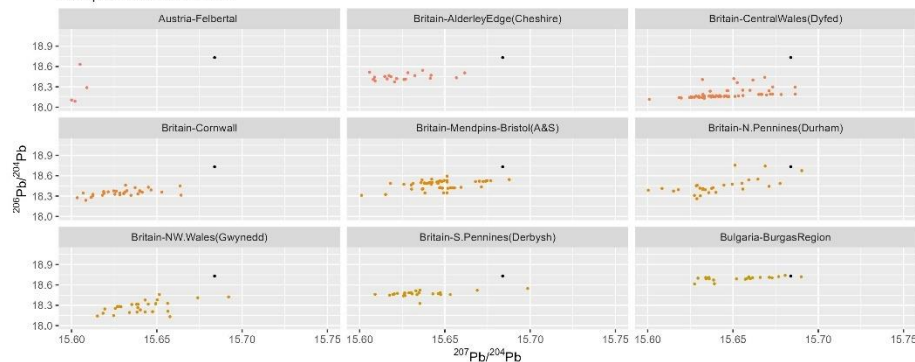

Sample 1-Denarius-44-5

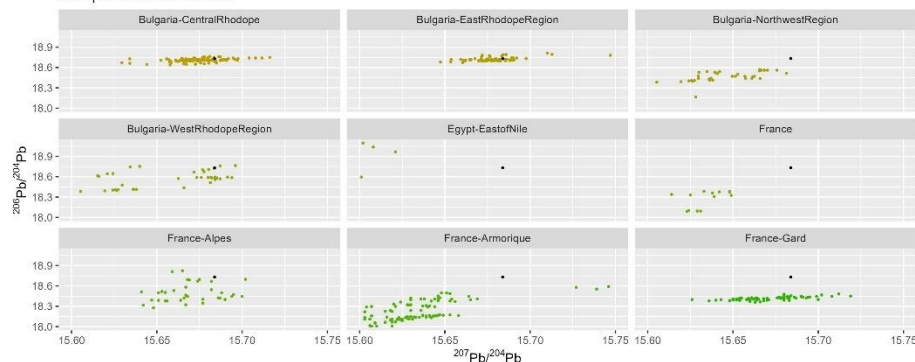

Sample 1-Denarius-44-5

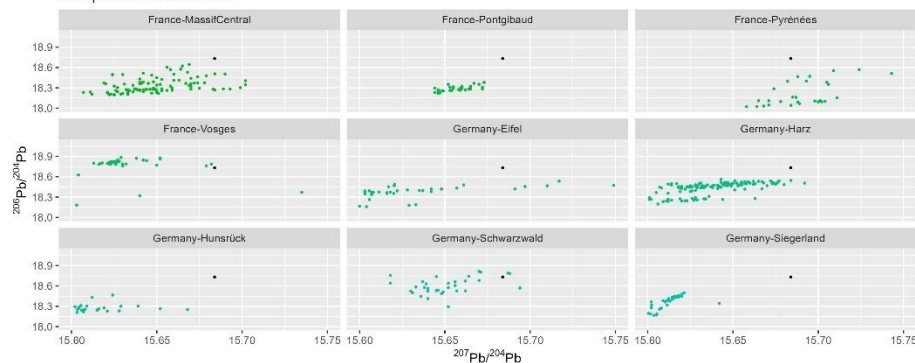

Sample 1-Denarius-44-5

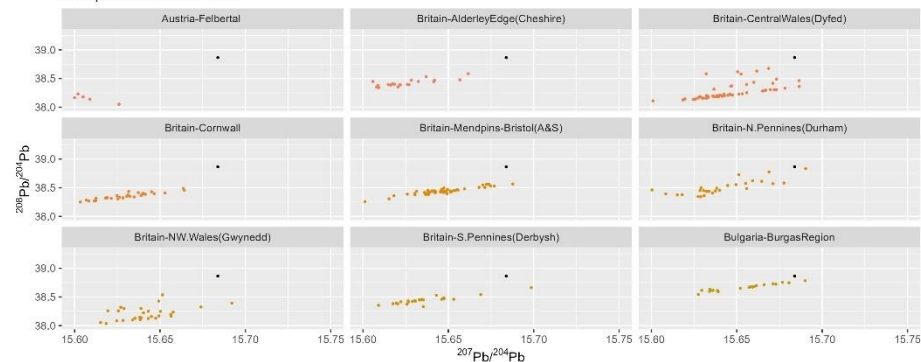

Sample 1-Denarius-44-5

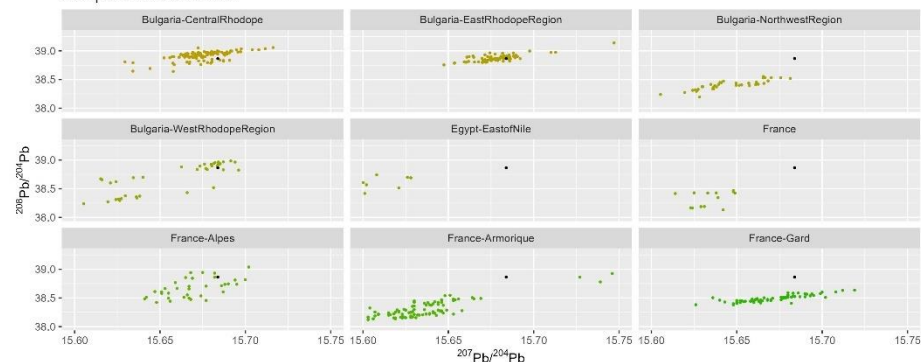

Sample 1-Denarius-44-5

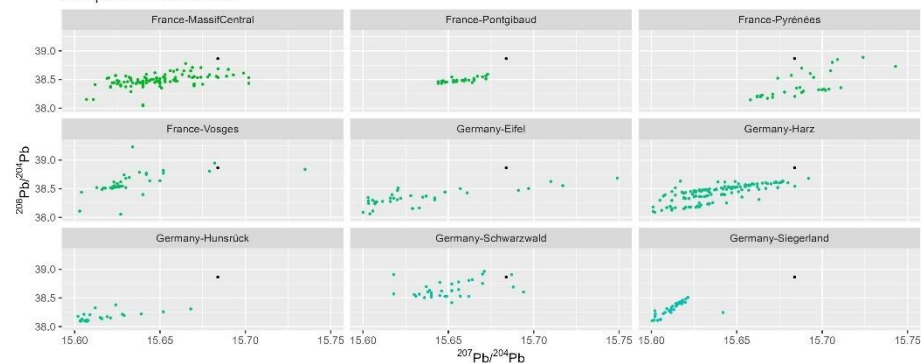

Sample 1-Denarius-44-5

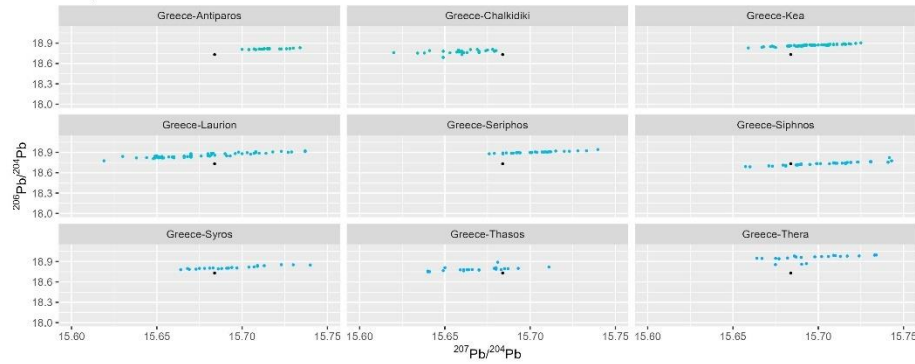

Sample 1-Denarius-44-5

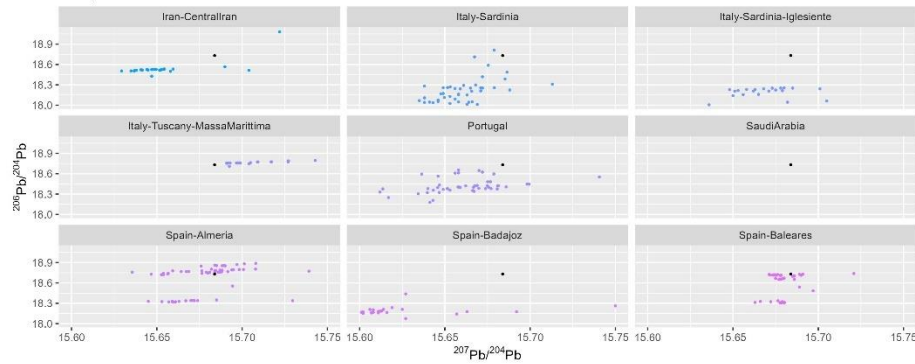

Sample 1-Denarius-44-5

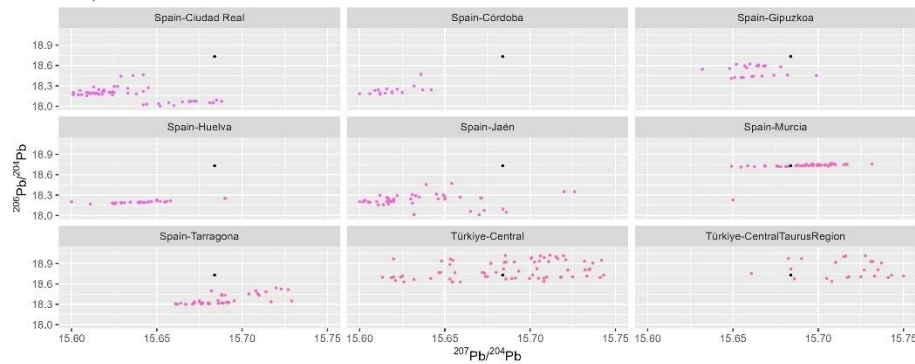

Sample 1-Denarius-44-5

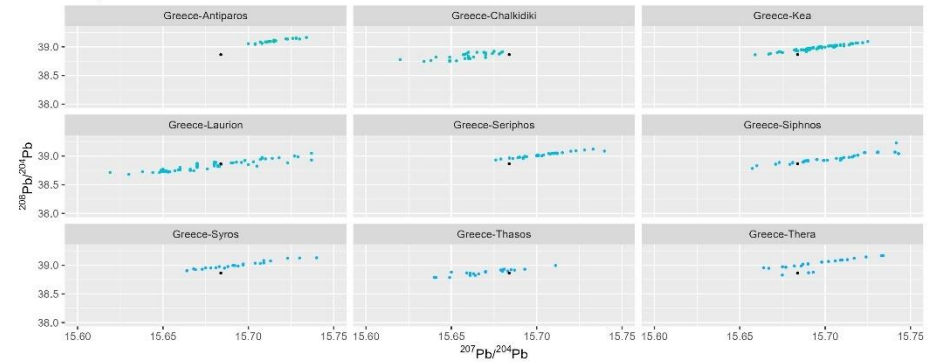

Sample 1-Denarius-44-5

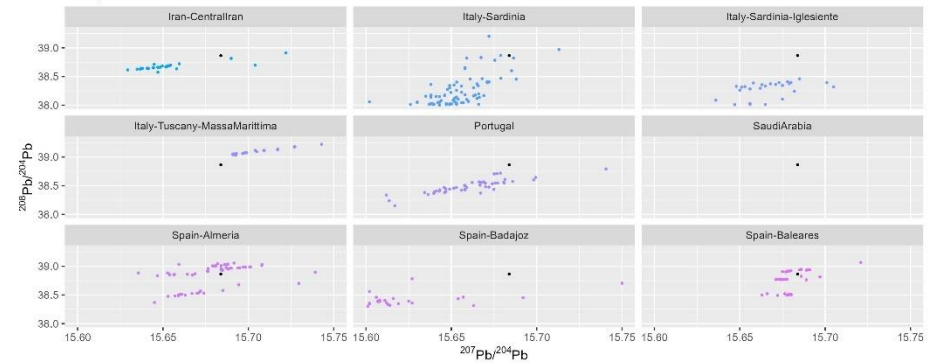

Sample 1-Denarius-44-5

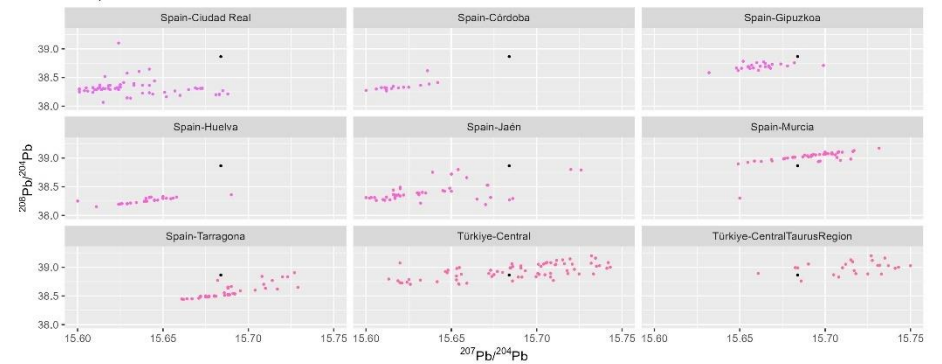

Sample 1-Denarius-44-5

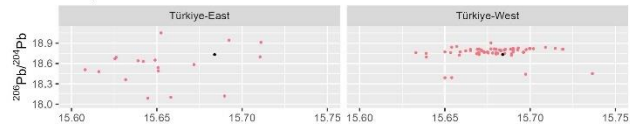

$^{207}\text{Pb}/^{204}\text{Pb}$

Sample 2-Dioscuri-139-1

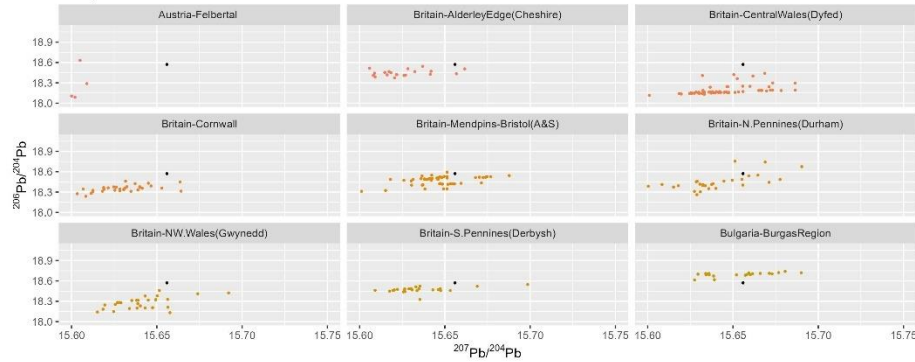

$^{207}\text{Pb}/^{204}\text{Pb}$

Sample 2-Dioscuri-139-1

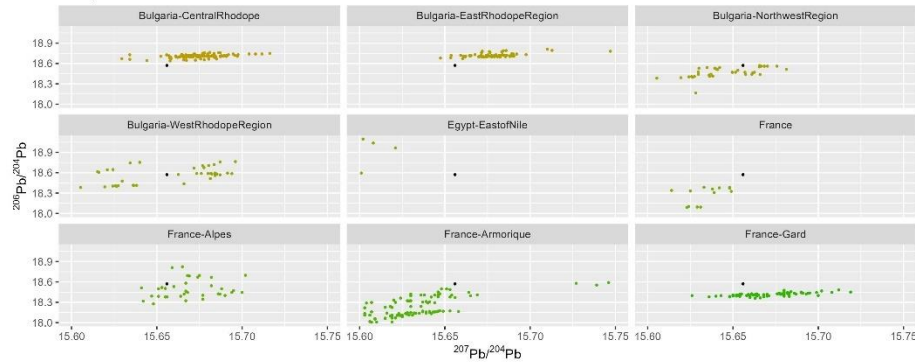

$^{207}\text{Pb}/^{204}\text{Pb}$

Sample 1-Denarius-44-5

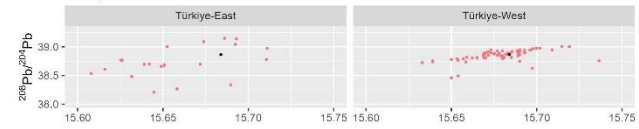

$^{207}\text{Pb}/^{204}\text{Pb}$

Sample 2-Dioscuri-139-1

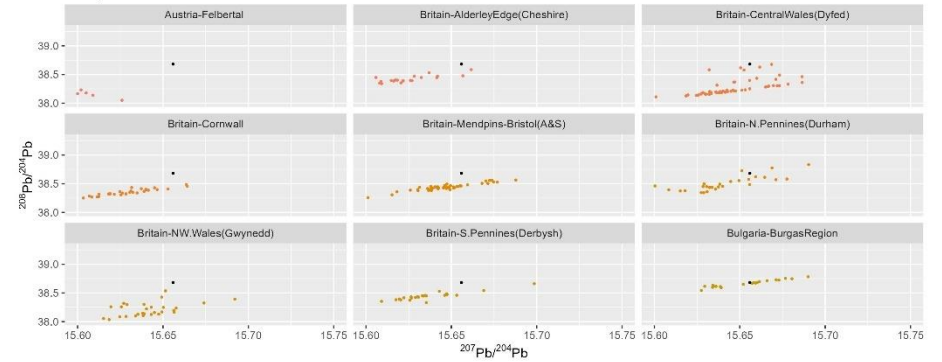

$^{207}\text{Pb}/^{204}\text{Pb}$

Sample 2-Dioscuri-139-1

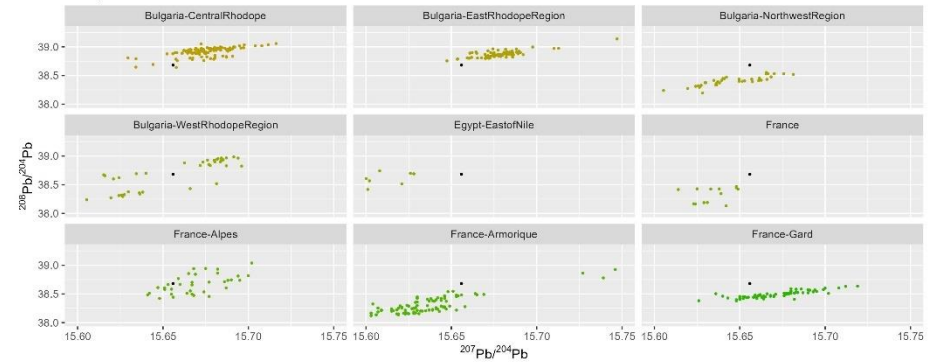

$^{207}\text{Pb}/^{204}\text{Pb}$

Sample 2-Dioscuri-139-1

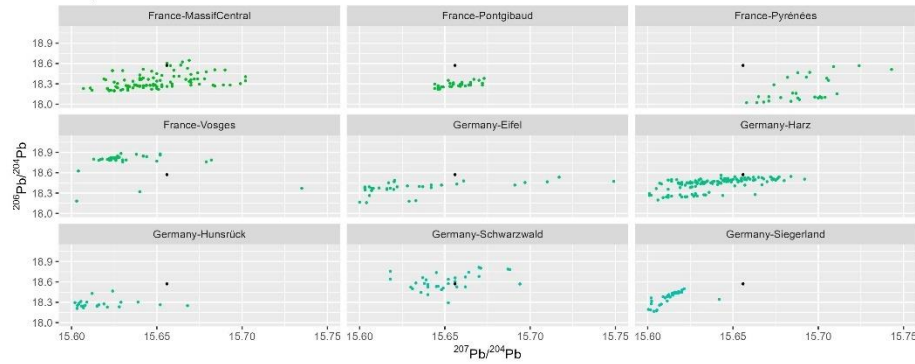

Sample 2-Dioscuri-139-1

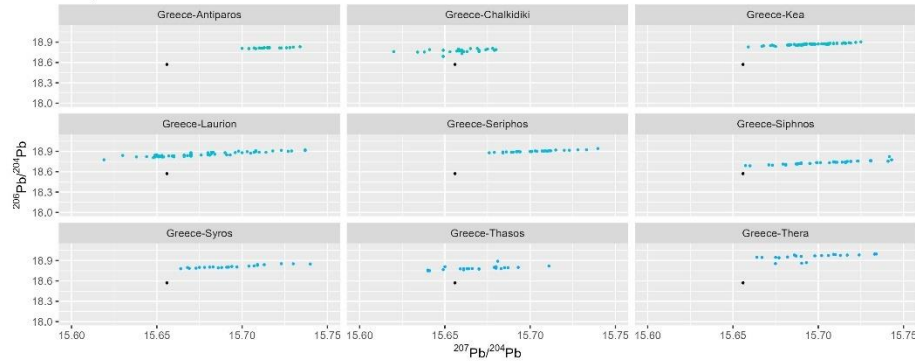

Sample 2-Dioscuri-139-1

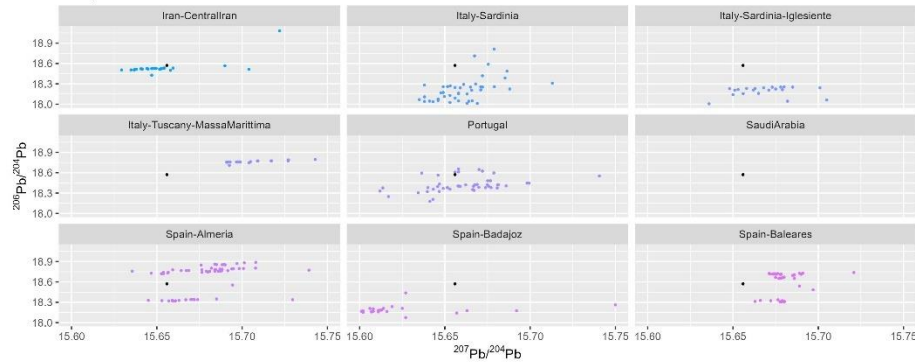

Sample 2-Dioscuri-139-1

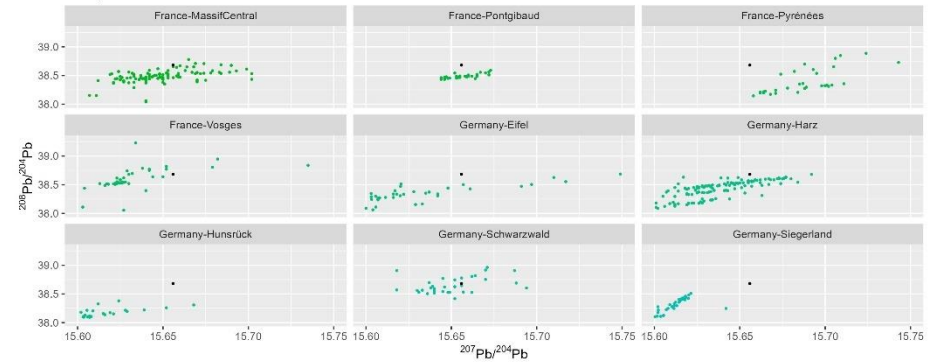

Sample 2-Dioscuri-139-1

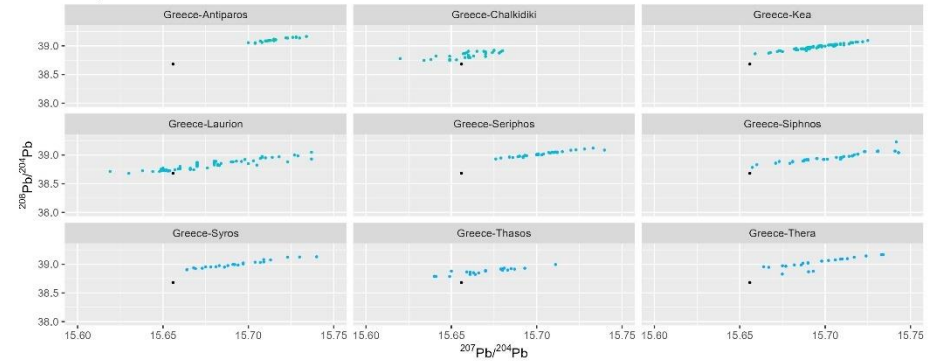

Sample 2-Dioscuri-139-1

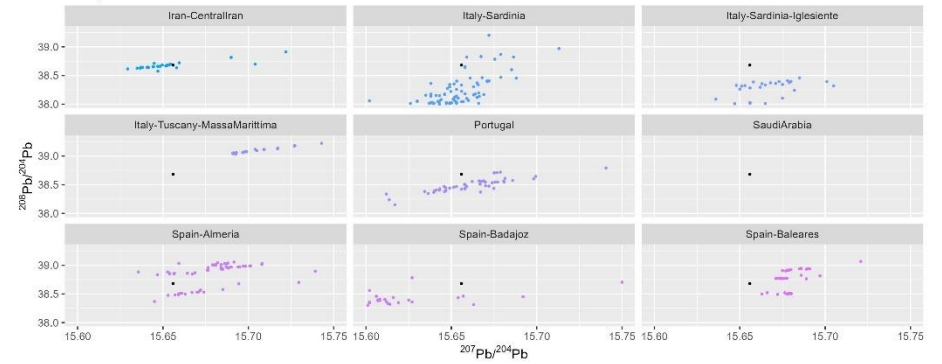



Sample 2-Dioscuri-139-1

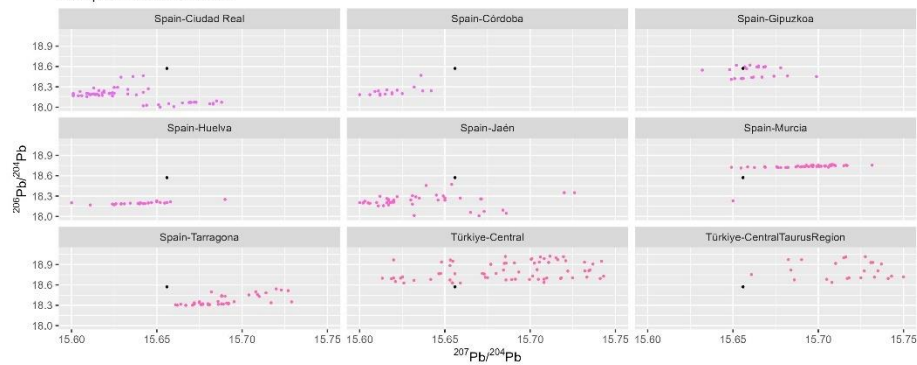

Sample 2-Dioscuri-139-1

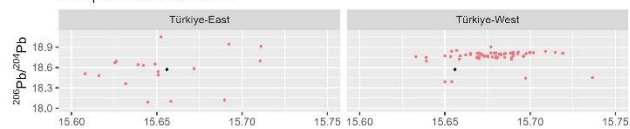

$^{207}\text{Pb}/^{204}\text{Pb}$

Sample 3-Victoriatus-44-1

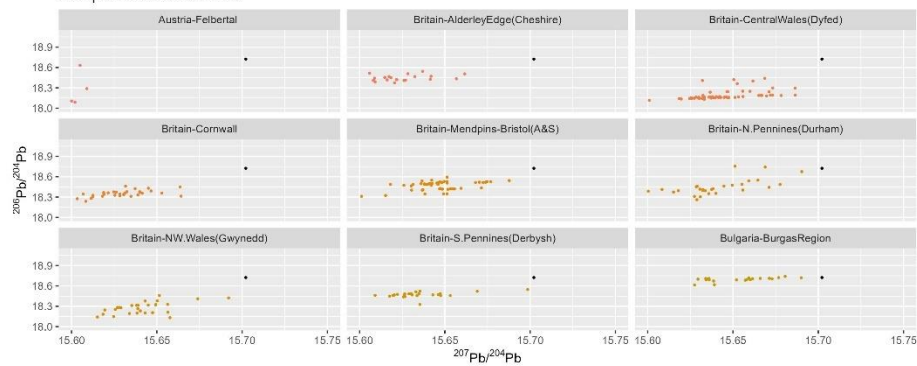

Sample 2-Dioscuri-139-1

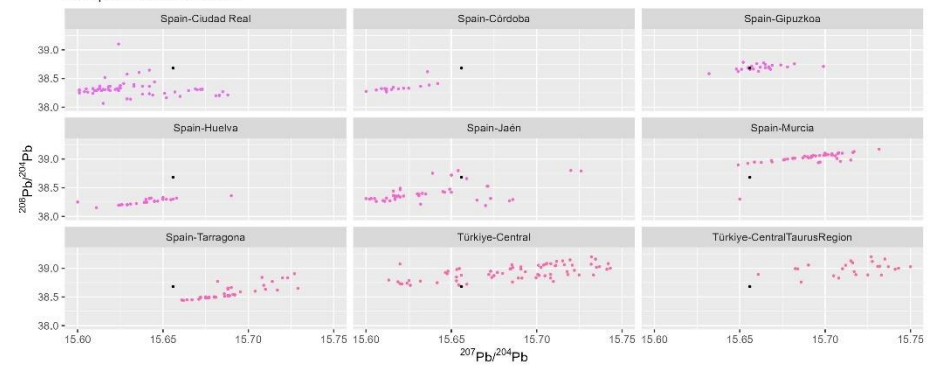

Sample 2-Dioscuri-139-1

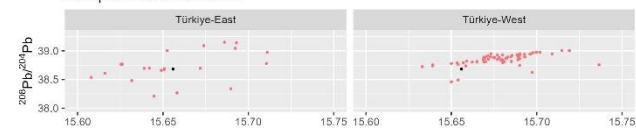

$^{207}\text{Pb}/^{204}\text{Pb}$

Sample 3-Victoriatus-44-1

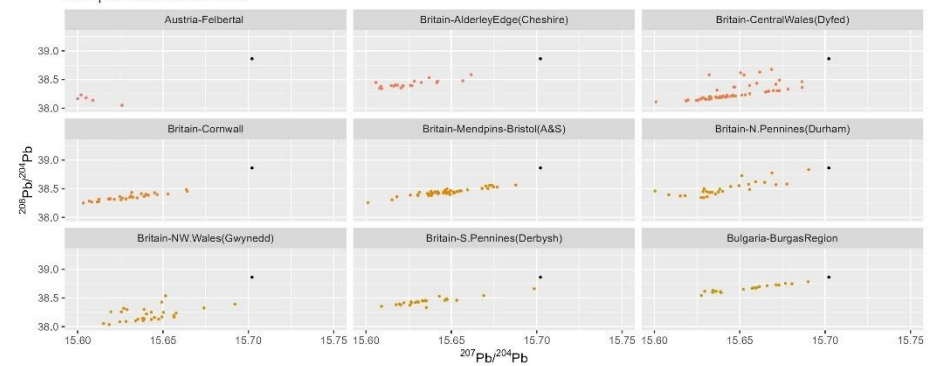

Sample 3-Victoriatus-44-1

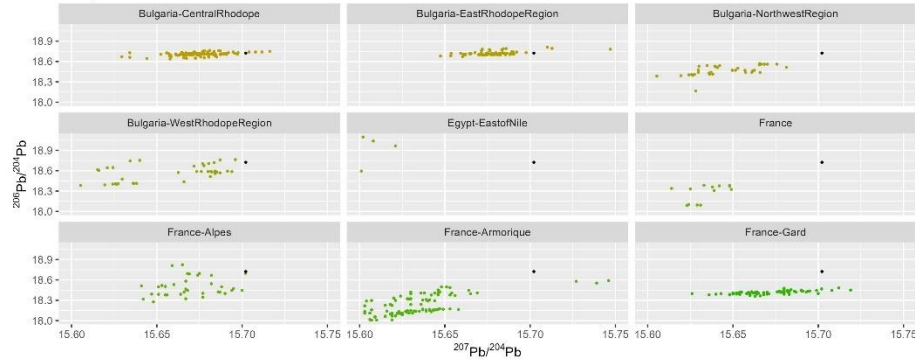

Sample 3-Victoriatus-44-1

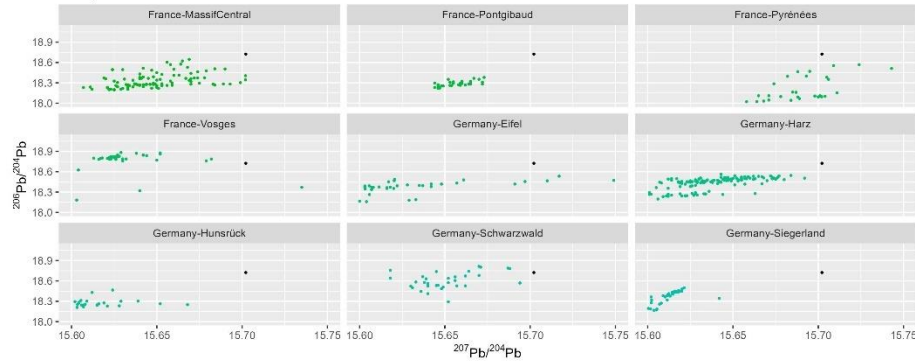

Sample 3-Victoriatus-44-1

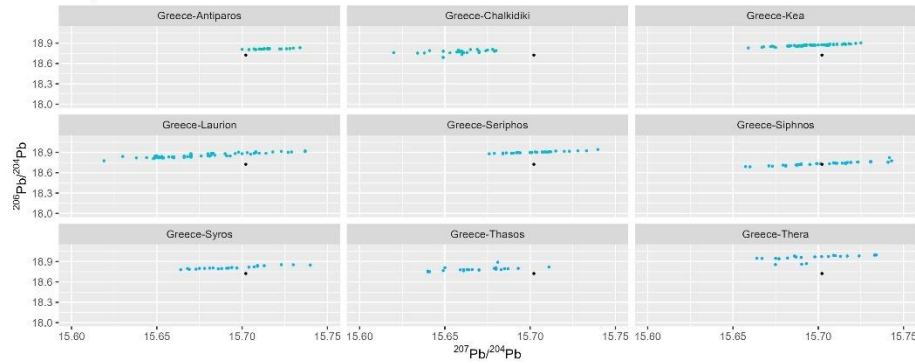

Sample 3-Victoriatus-44-1

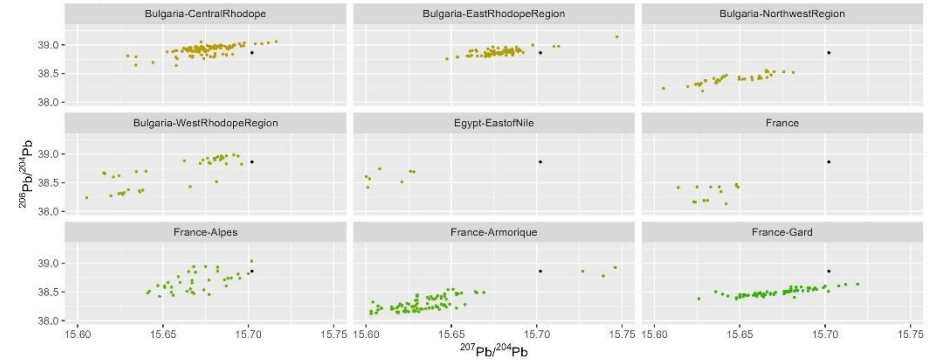

Sample 3-Victoriatus-44-1

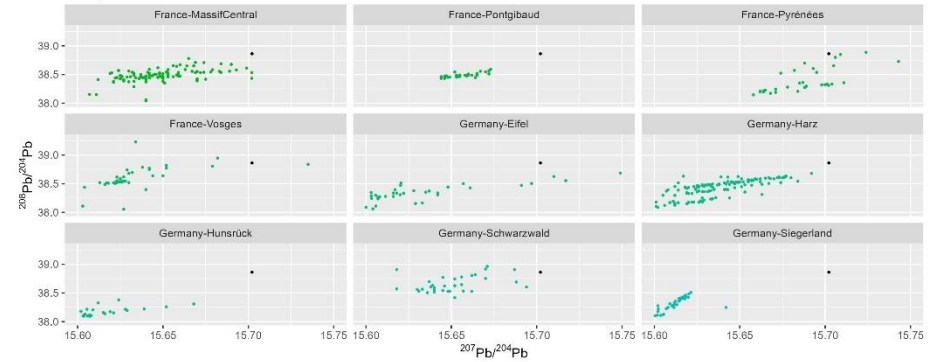

Sample 3-Victoriatus-44-1

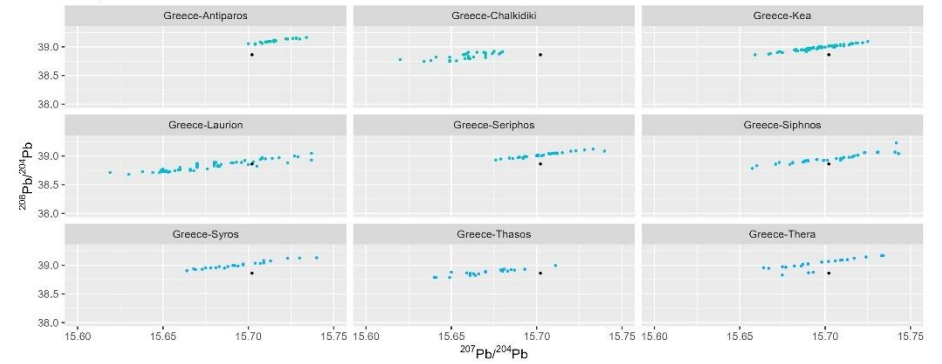

Sample 3-Victoriatus-44-1

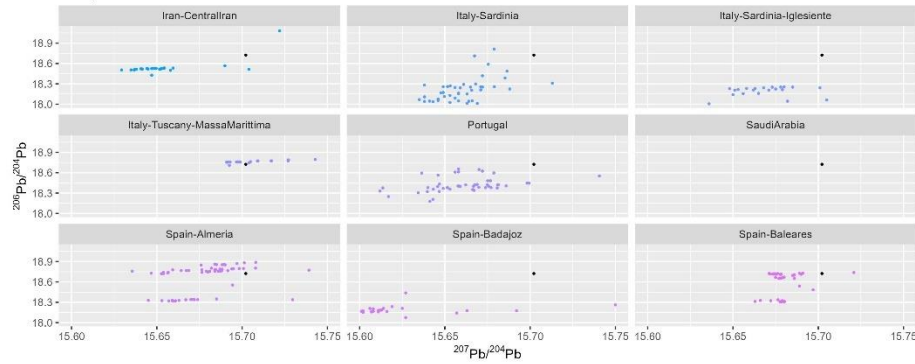

Sample 3-Victoriatus-44-1

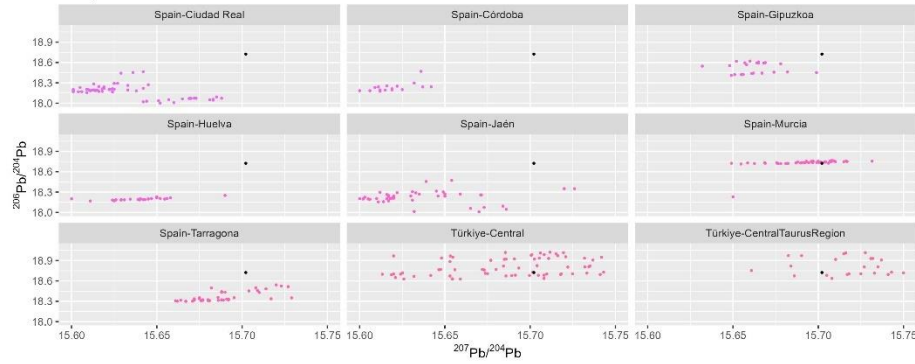

Sample 3-Victoriatus-44-1

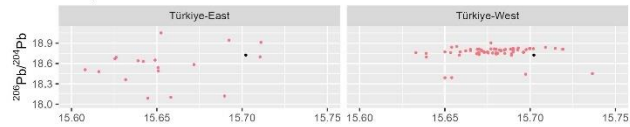

207Pb/204Pb

Sample 3-Victoriatus-44-1

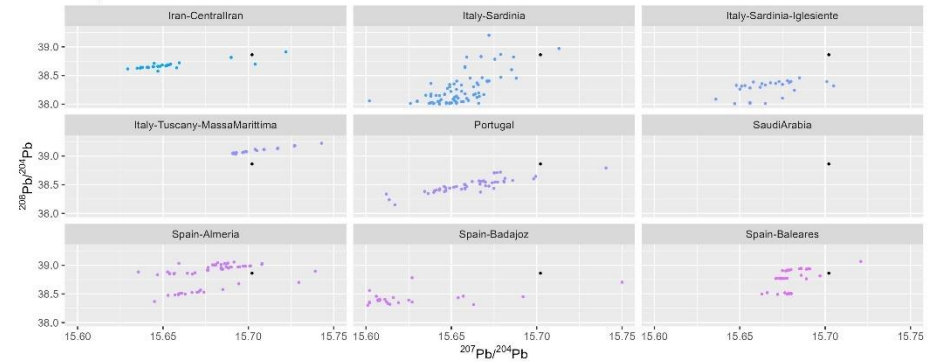

Sample 3-Victoriatus-44-1

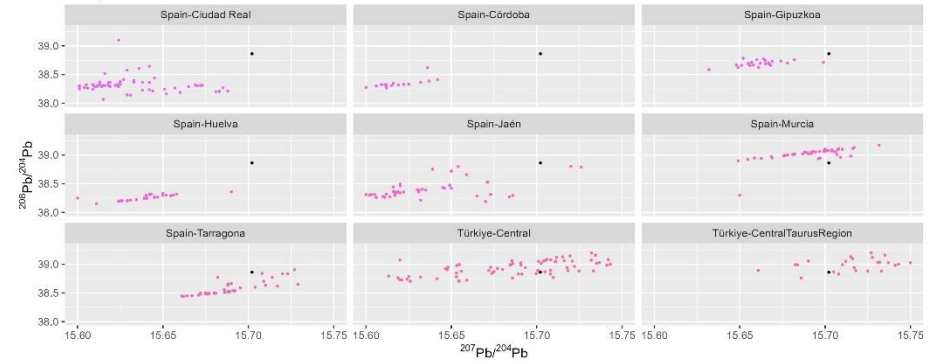

Sample 3-Victoriatus-44-1

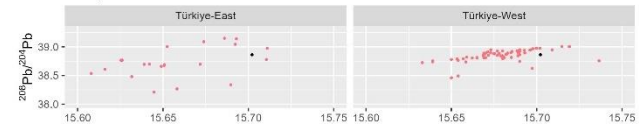

207Pb/204Pb

Sample 4-Quinarius-44-6

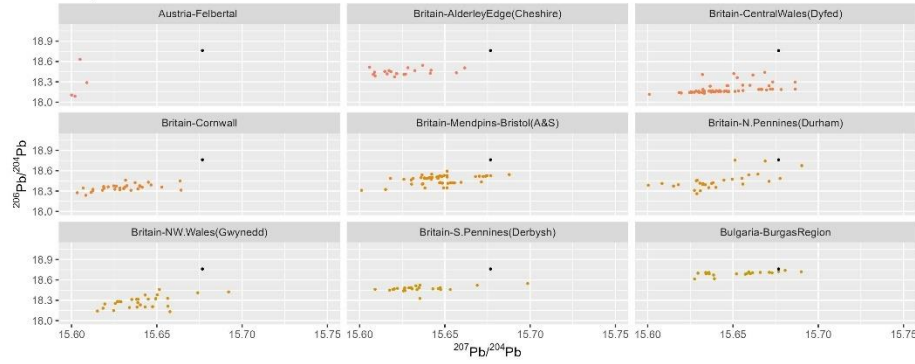

Sample 4-Quinarius-44-6

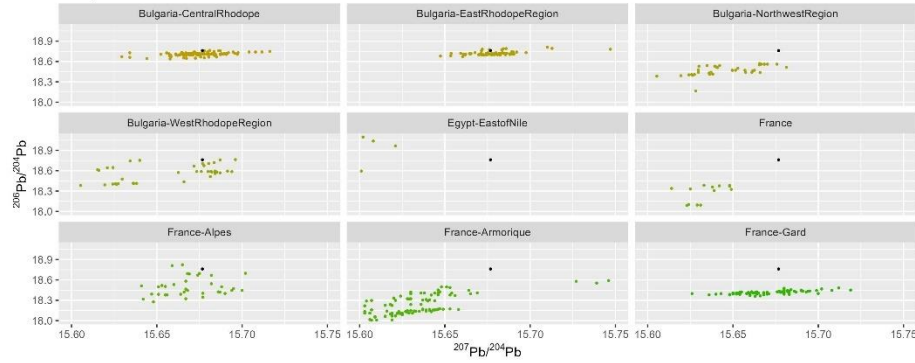

Sample 4-Quinarius-44-6

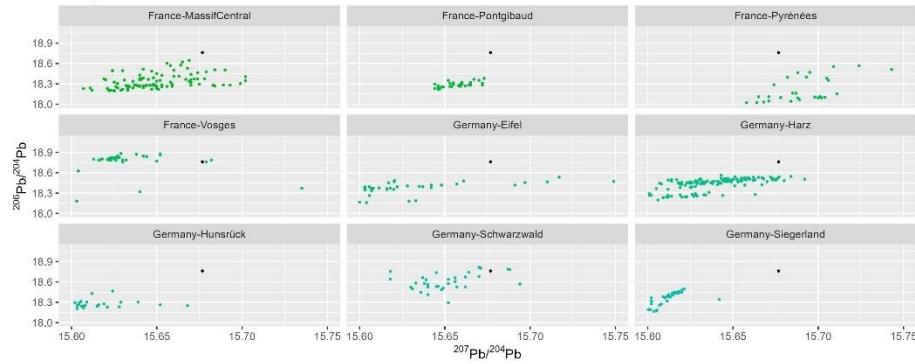

Sample 4-Quinarius-44-6

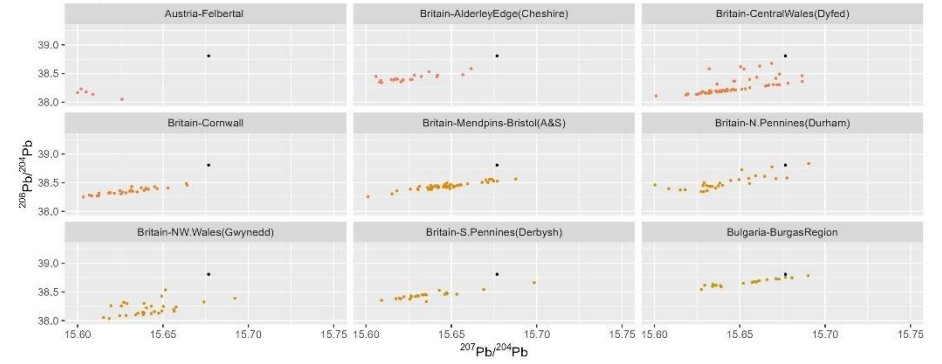

Sample 4-Quinarius-44-6

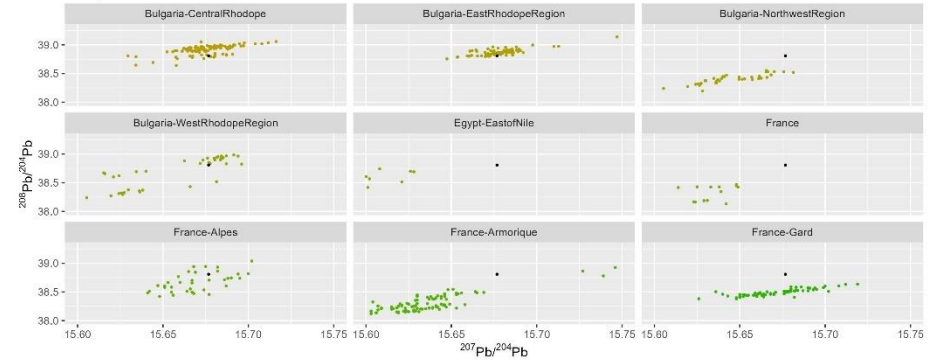

Sample 4-Quinarius-44-6

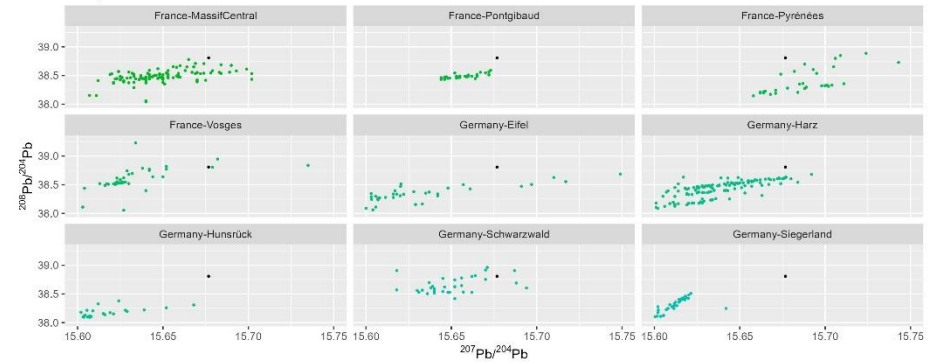



Sample 4-Quinarius-44-6

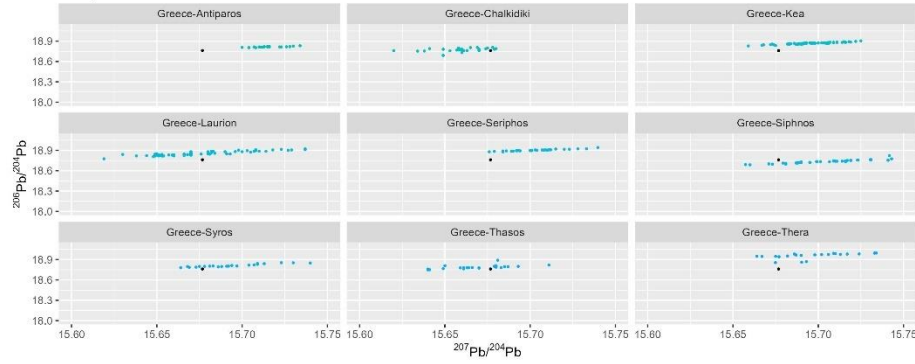

Sample 4-Quinarius-44-6

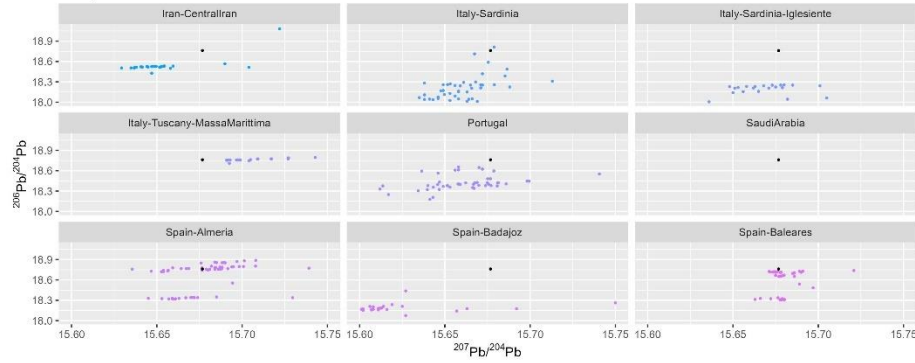

Sample 4-Quinarius-44-6

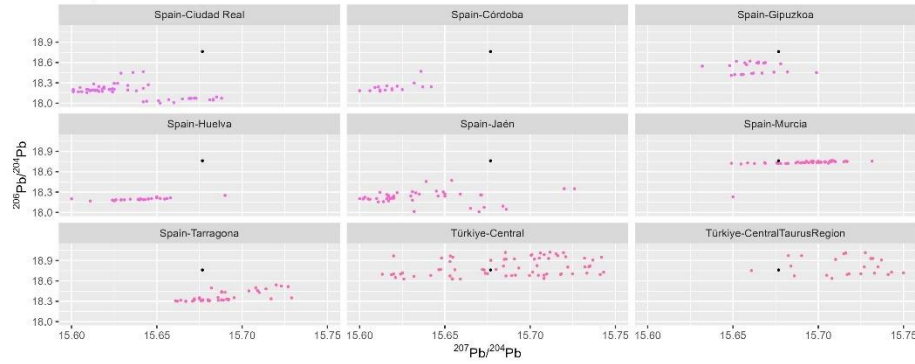

Sample 4-Quinarius-44-6

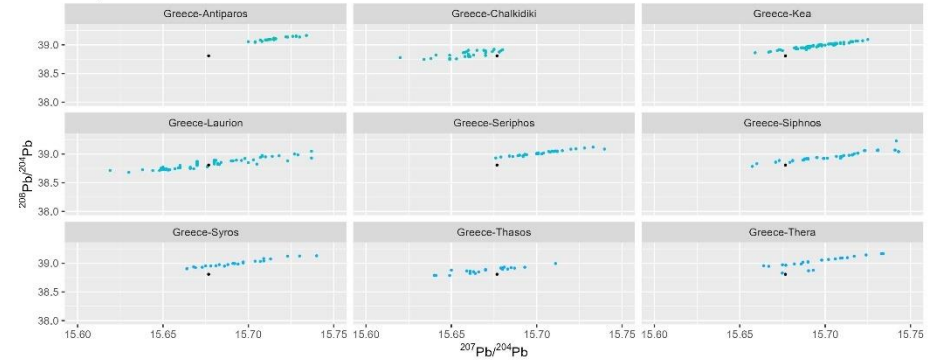

Sample 4-Quinarius-44-6

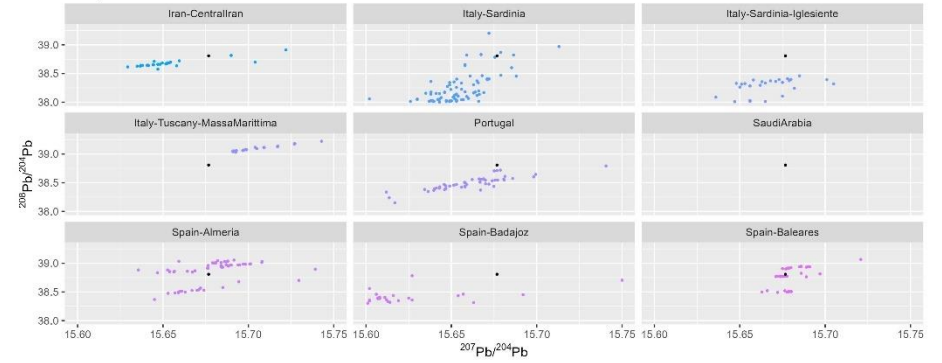

Sample 4-Quinarius-44-6

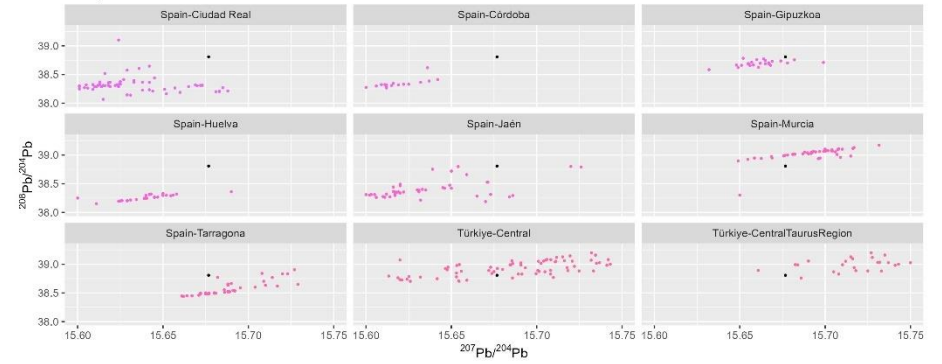

Sample 4-Quinarius-44-6

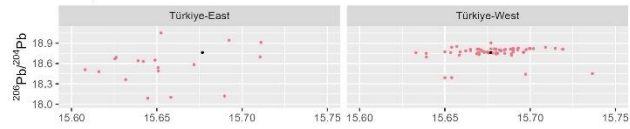

$^{207}\text{Pb}/^{204}\text{Pb}$

Sample 5-Denarius-53-2

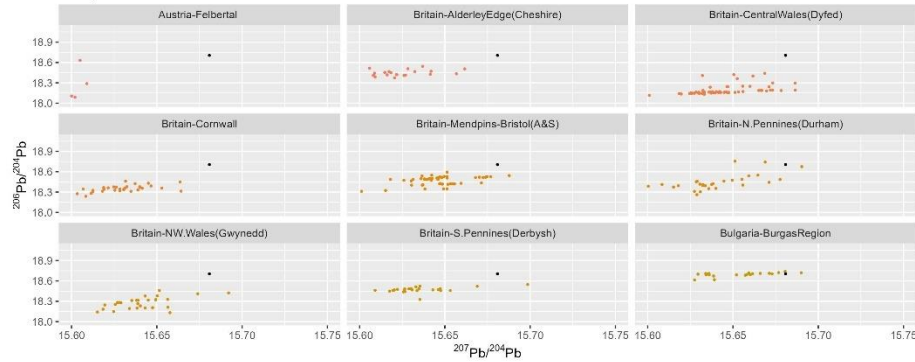

$^{207}\text{Pb}/^{204}\text{Pb}$

Sample 5-Denarius-53-2

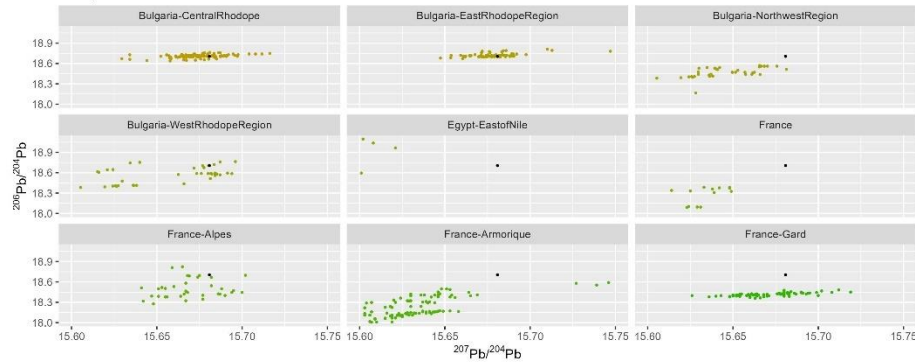

$^{207}\text{Pb}/^{204}\text{Pb}$

Sample 4-Quinarius-44-6

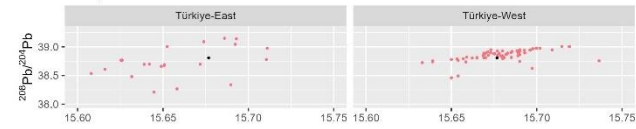

$^{207}\text{Pb}/^{204}\text{Pb}$

Sample 5-Denarius-53-2

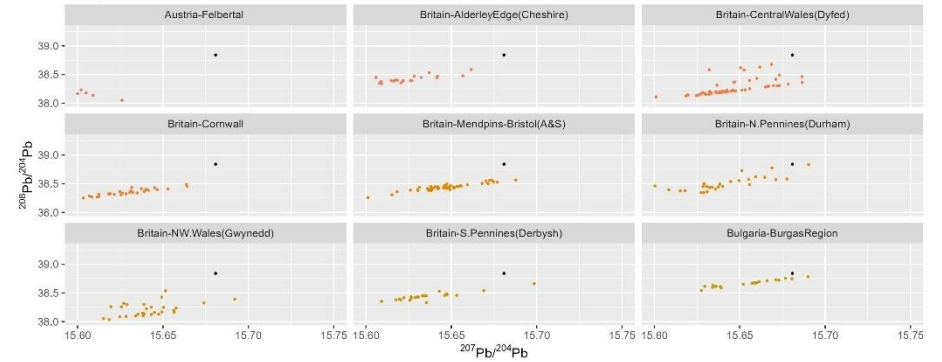

$^{207}\text{Pb}/^{204}\text{Pb}$

Sample 5-Denarius-53-2

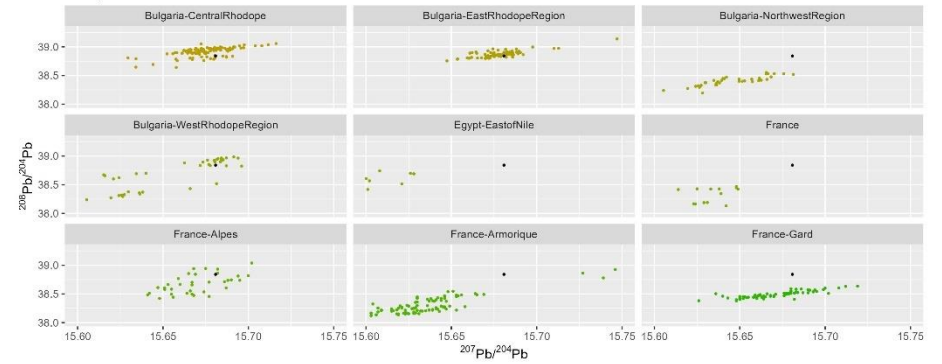

$^{207}\text{Pb}/^{204}\text{Pb}$

Sample 5-Denarius-53-2

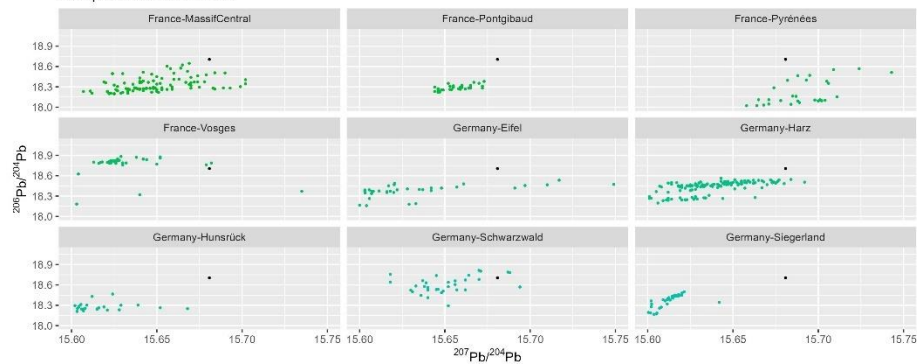

Sample 5-Denarius-53-2

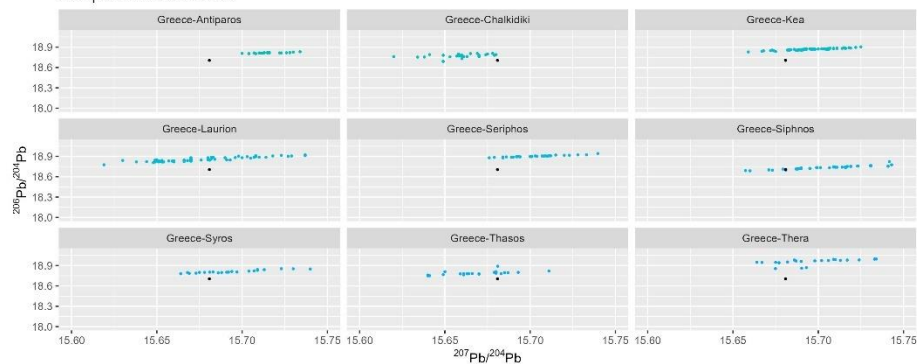

Sample 5-Denarius-53-2

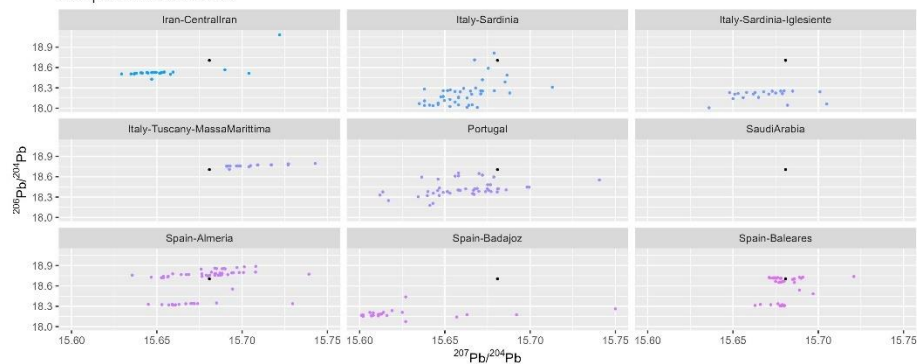

Sample 5-Denarius-53-2

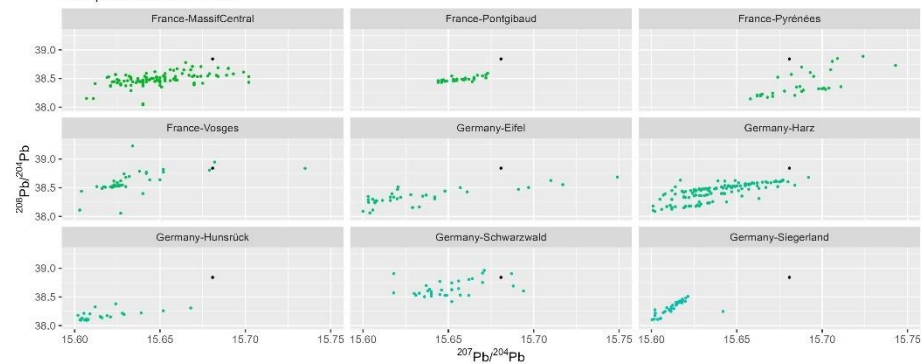

Sample 5-Denarius-53-2

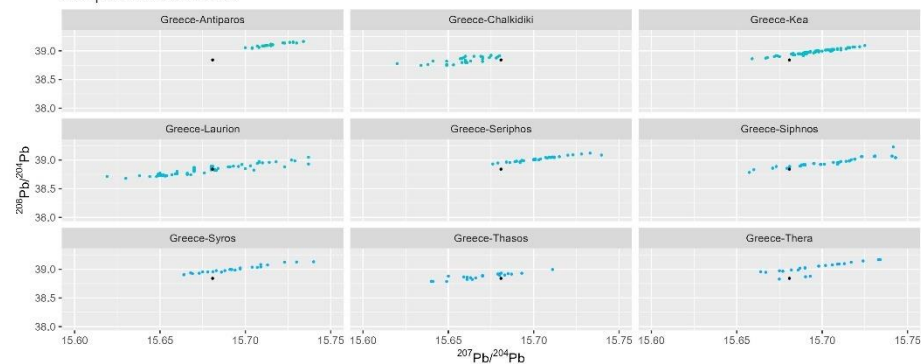

Sample 5-Denarius-53-2

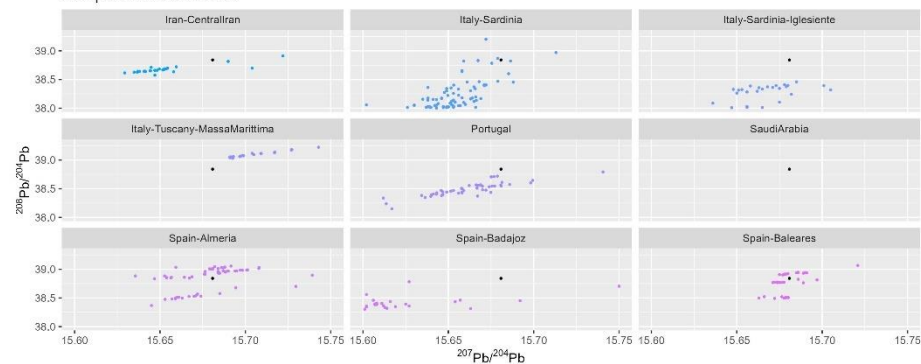

Sample 5-Denarius-53-2

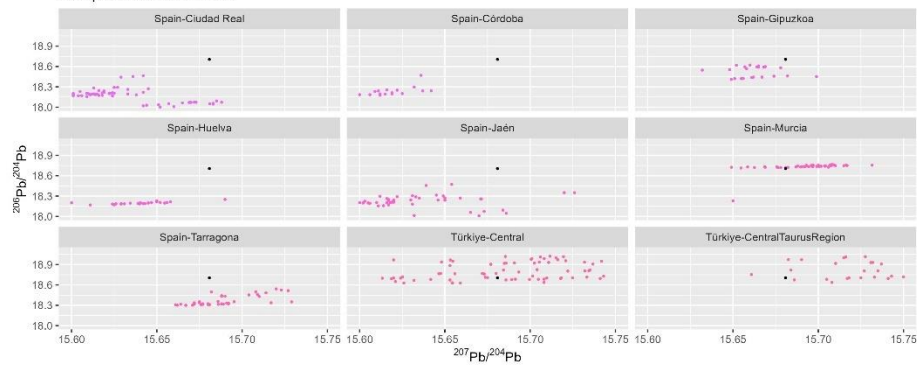

Sample 5-Denarius-53-2

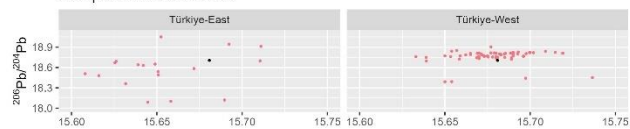

Sample 5-Denarius-53-2

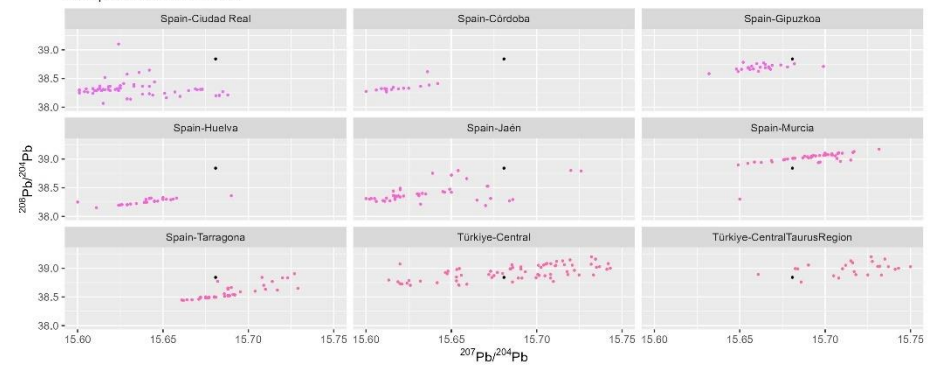

Sample 5-Denarius-53-2

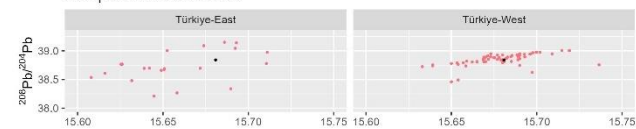

$^{207}\text{Pb}/^{204}\text{Pb}$

Sample 6-Victoriatus-98A-1a

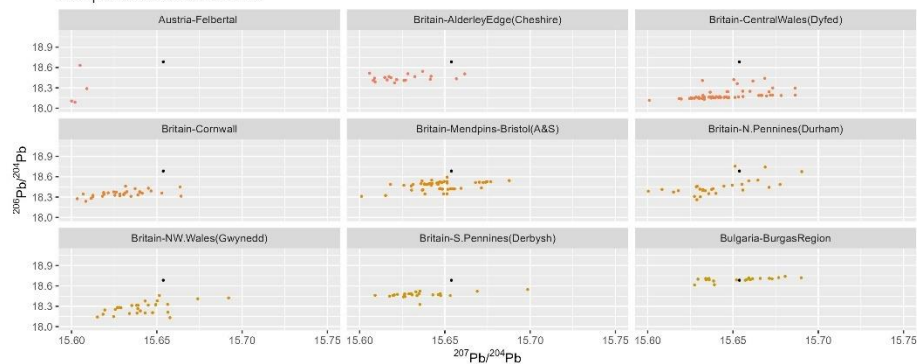

$^{207}\text{Pb}/^{204}\text{Pb}$

Sample 6-Victoriatus-98A-1a

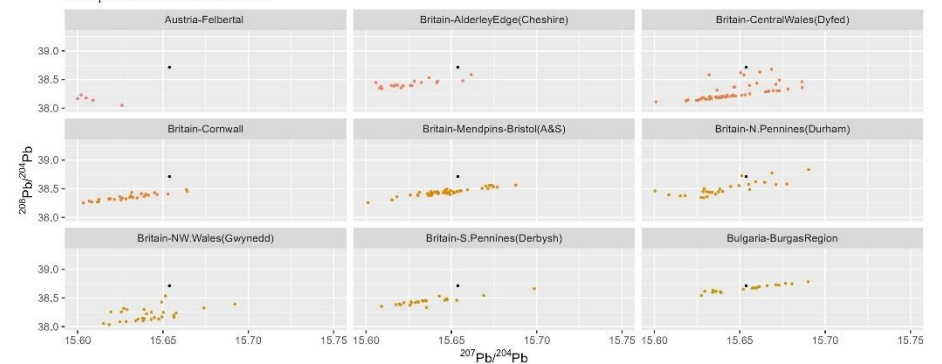



Sample 6-Victoriatus-98A-1a

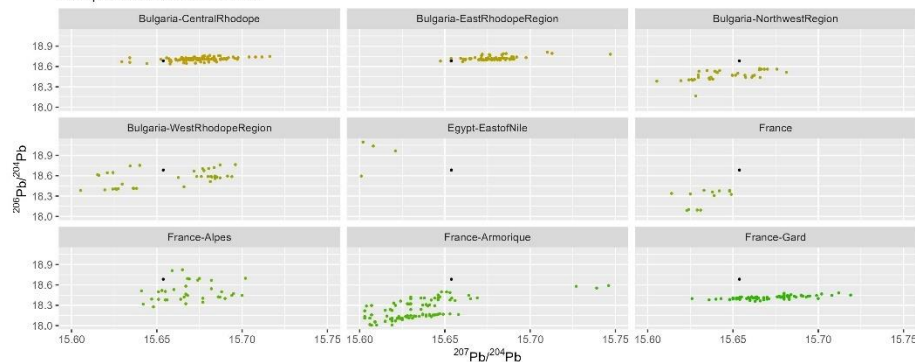

Sample 6-Victoriatus-98A-1a

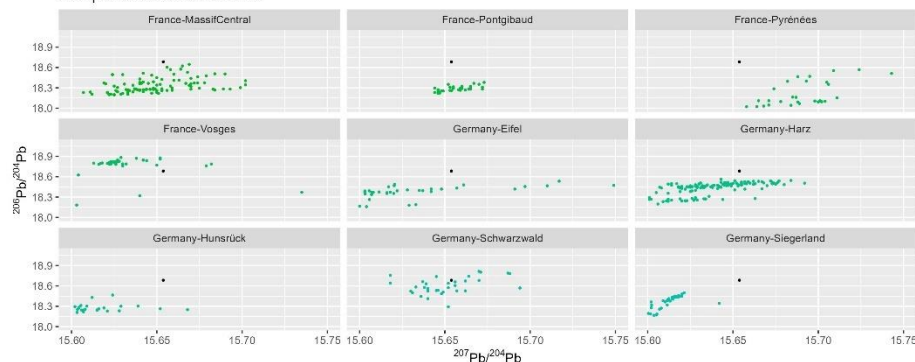

Sample 6-Victoriatus-98A-1a

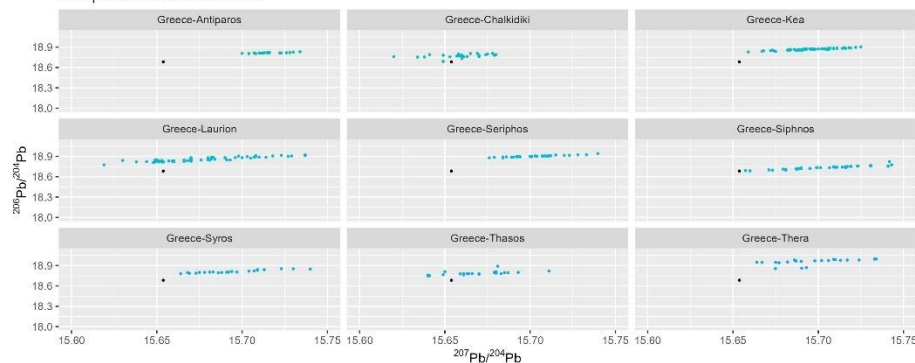

Sample 6-Victoriatus-98A-1a

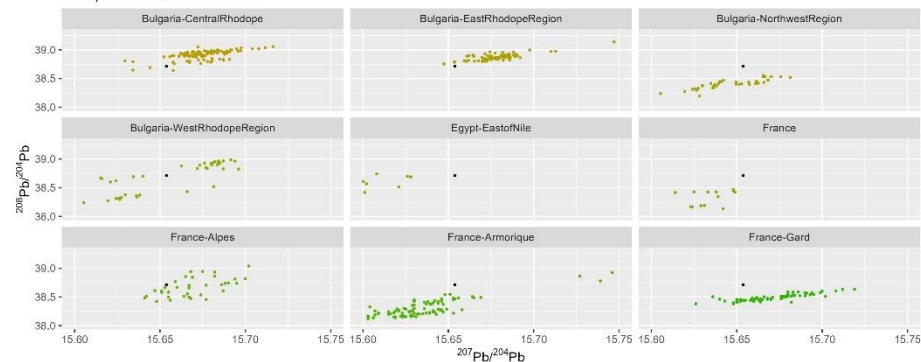

Sample 6-Victoriatus-98A-1a

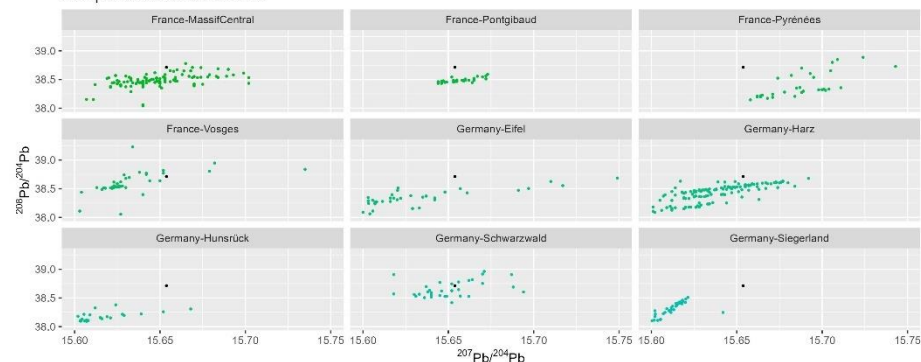

Sample 6-Victoriatus-98A-1a

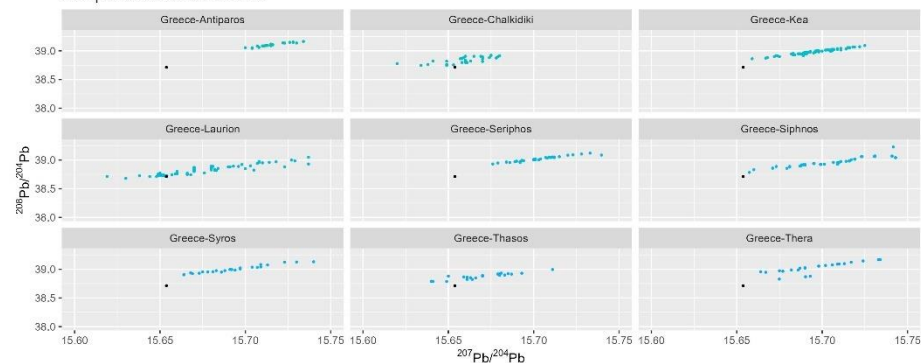

Sample 6-Victoriatus-98A-1a

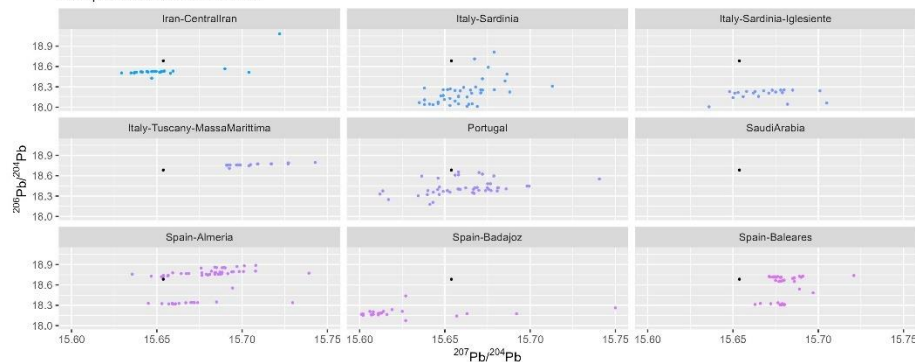

Sample 6-Victoriatus-98A-1a

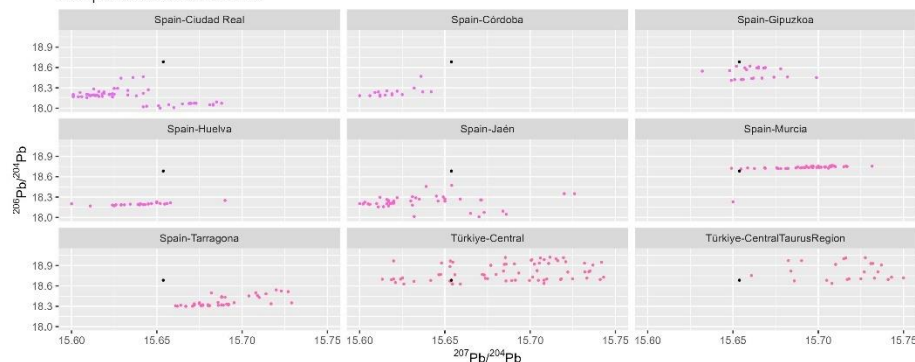

Sample 6-Victoriatus-98A-1a

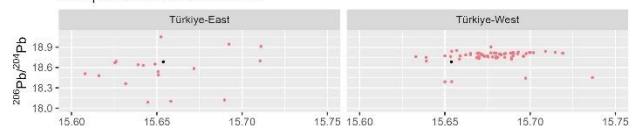

207Pb/204Pb

Sample 6-Victoriatus-98A-1a

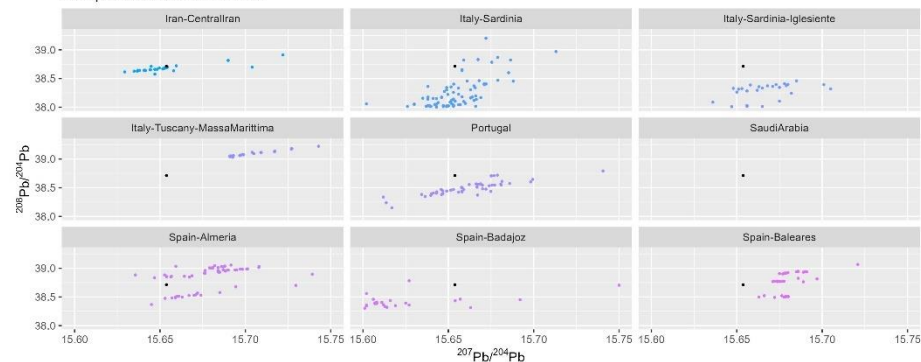

Sample 6-Victoriatus-98A-1a

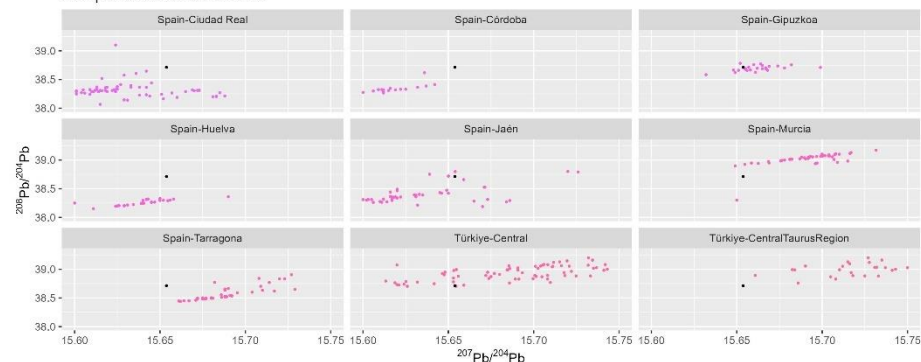

Sample 6-Victoriatus-98A-1a

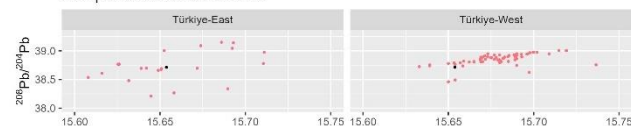

207Pb/204Pb

Sample 7-Denarius-Marcia

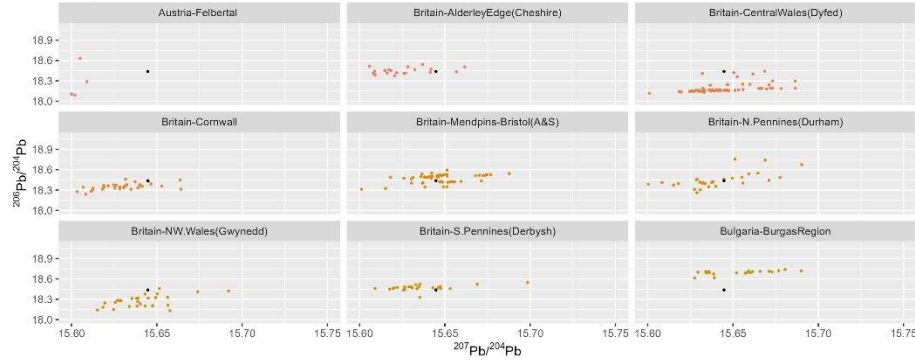

Sample 7-Denarius-Marcia

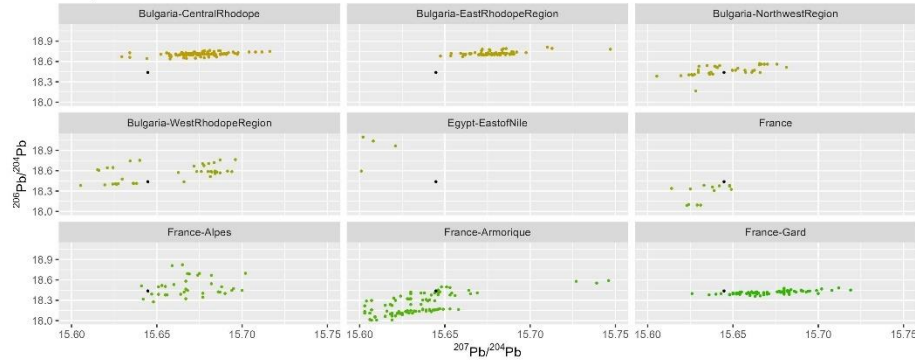

Sample 7-Denarius-Marcia

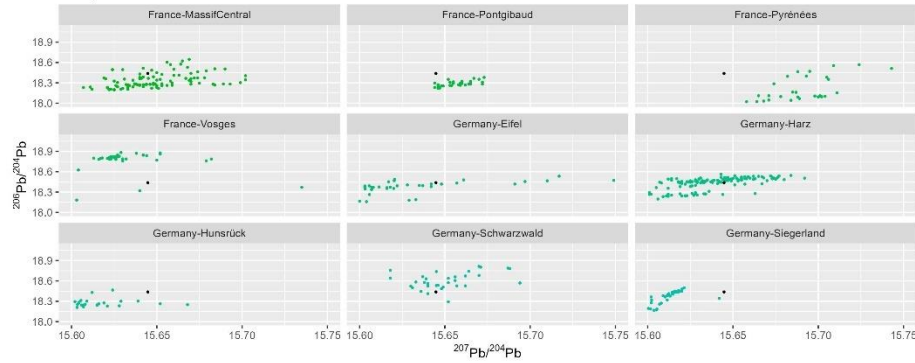

Sample 7-Denarius-Marcia

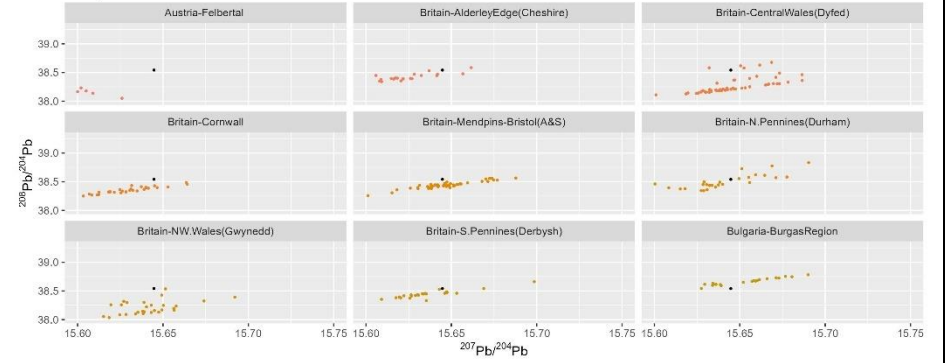

Sample 7-Denarius-Marcia

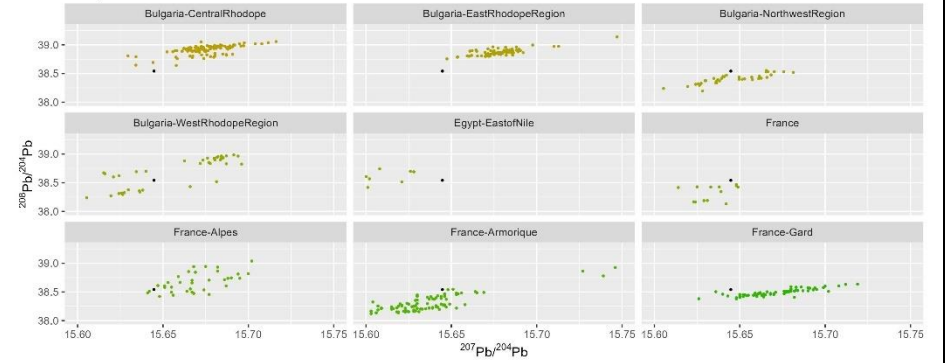

Sample 7-Denarius-Marcia

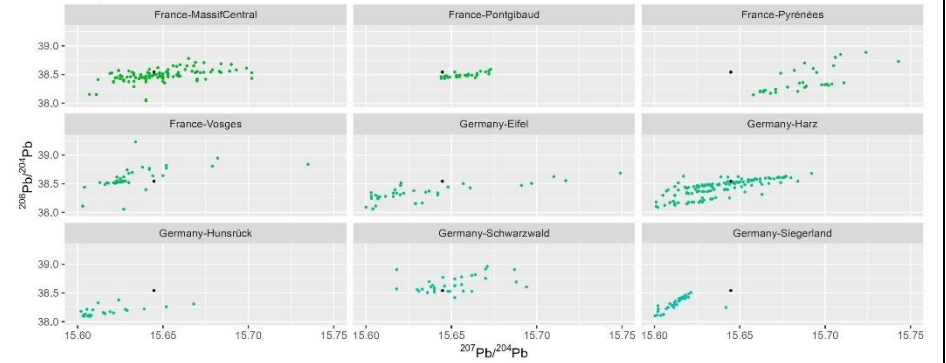

Sample 7-Denarius-Marcia

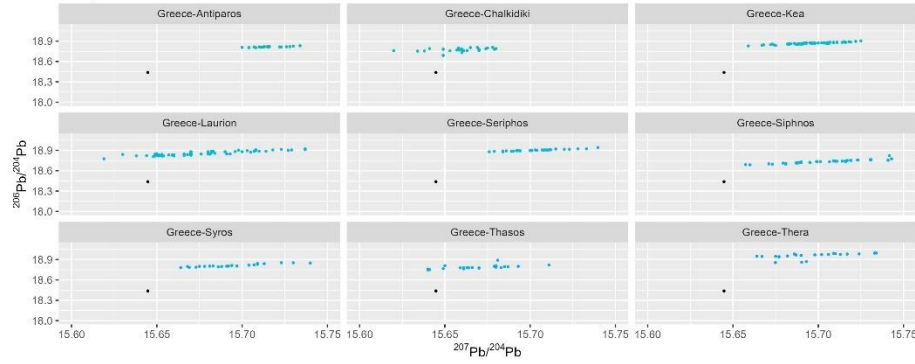

Sample 7-Denarius-Marcia

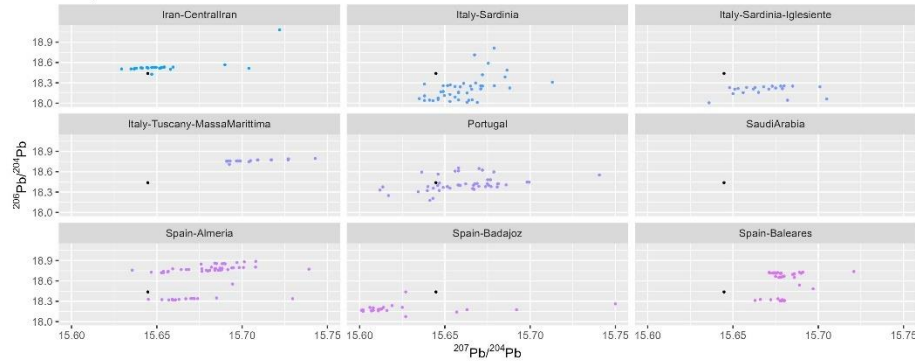

Sample 7-Denarius-Marcia

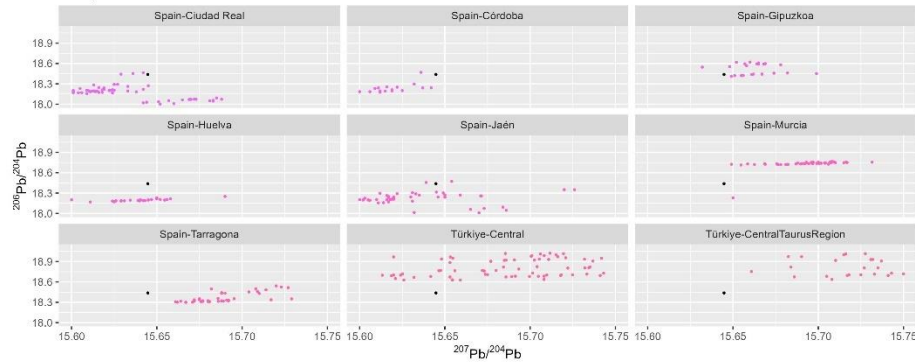

Sample 7-Denarius-Marcia

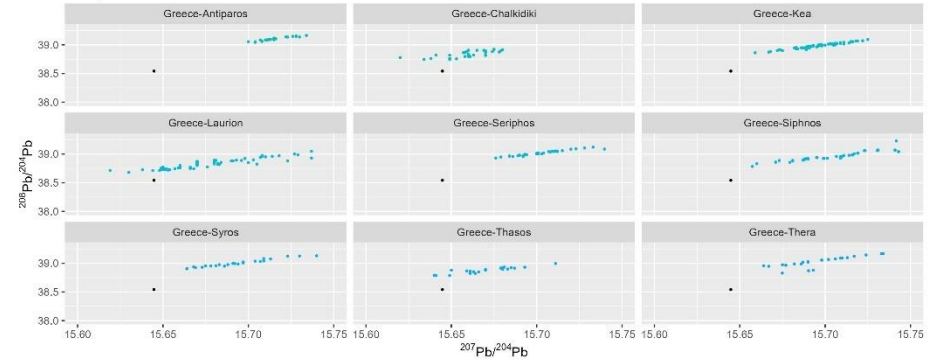

Sample 7-Denarius-Marcia

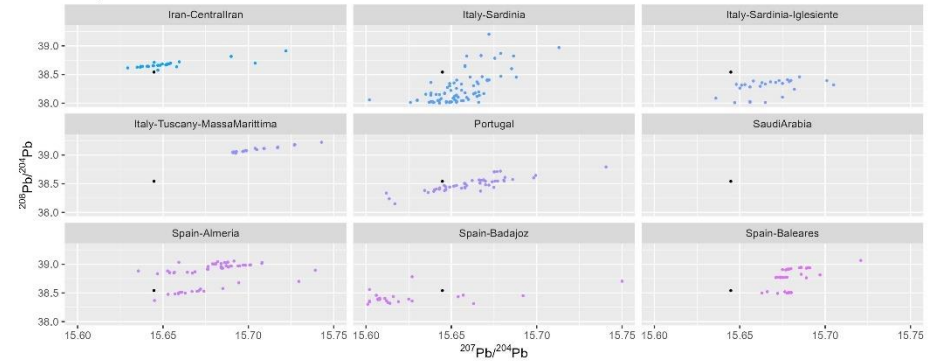

Sample 7-Denarius-Marcia

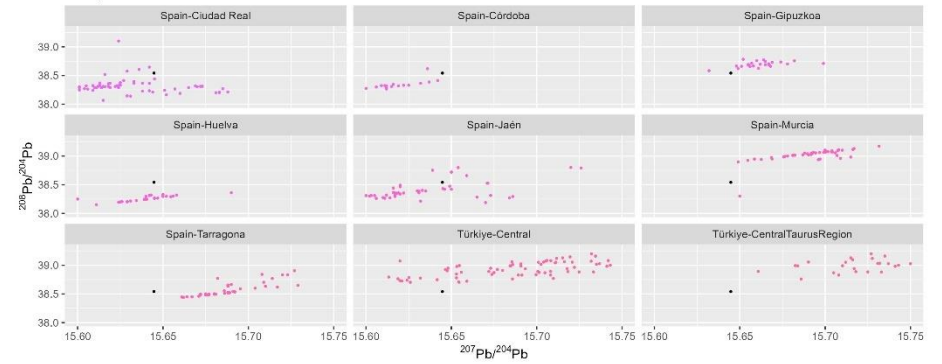





Sample 8-Denarius-80-1a

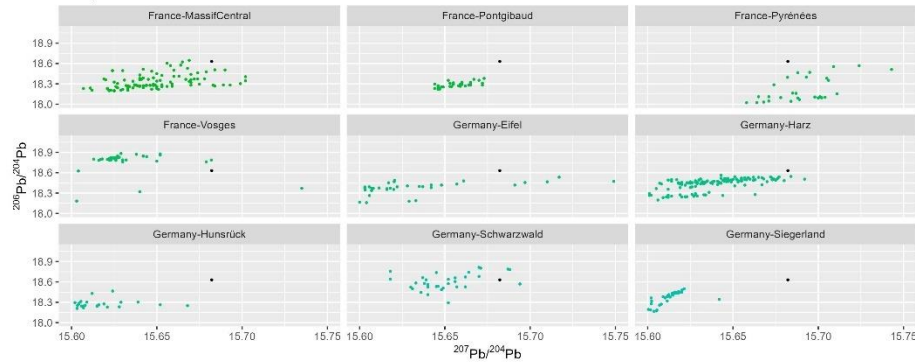

Sample 8-Denarius-80-1a

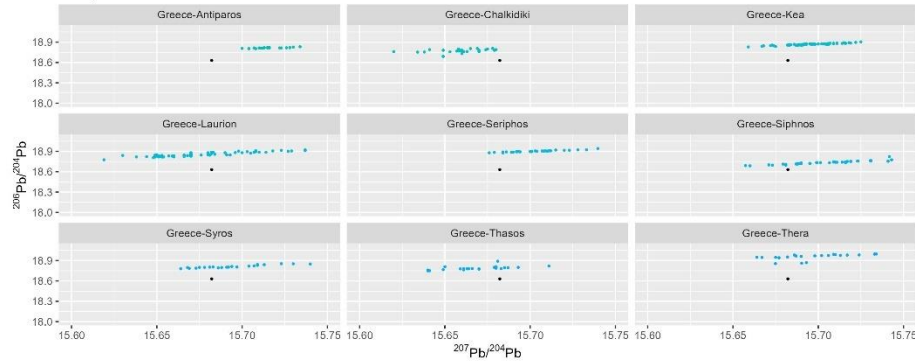

Sample 8-Denarius-80-1a

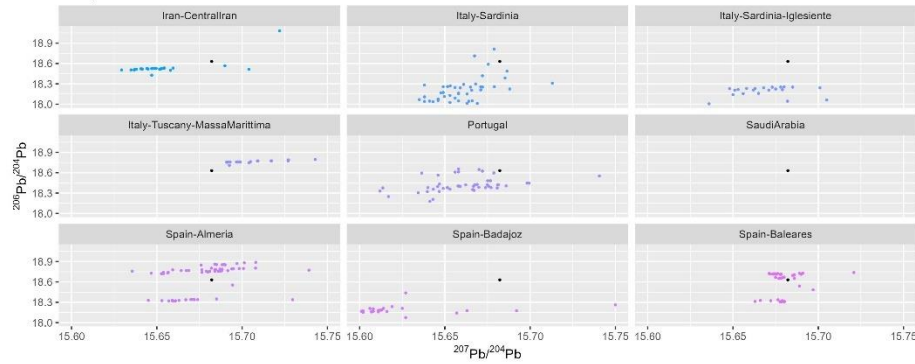

Sample 8-Denarius-80-1a

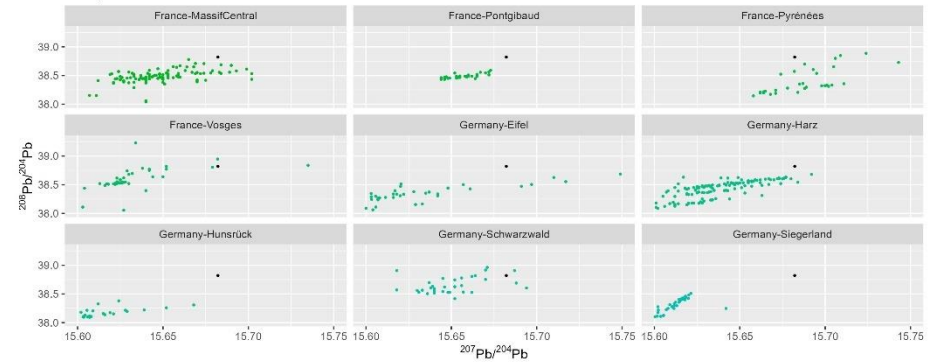

Sample 8-Denarius-80-1a

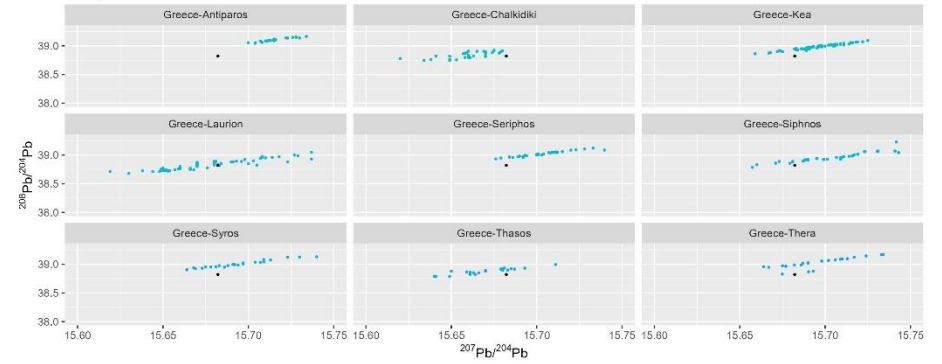

Sample 8-Denarius-80-1a

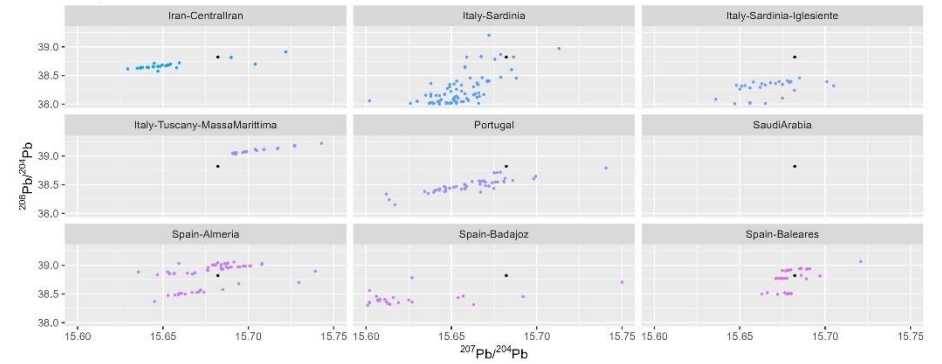

Sample 8-Denarius-80-1a

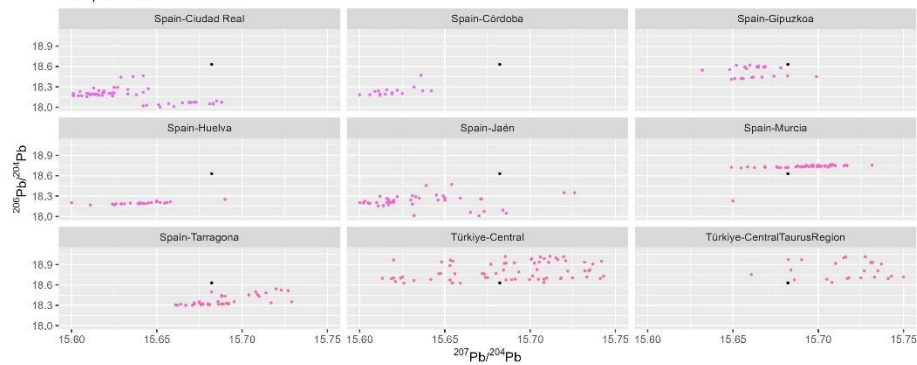

Sample 8-Denarius-80-1a

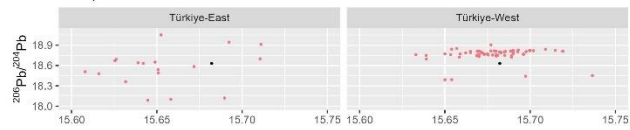

Sample 8-Denarius-80-1a

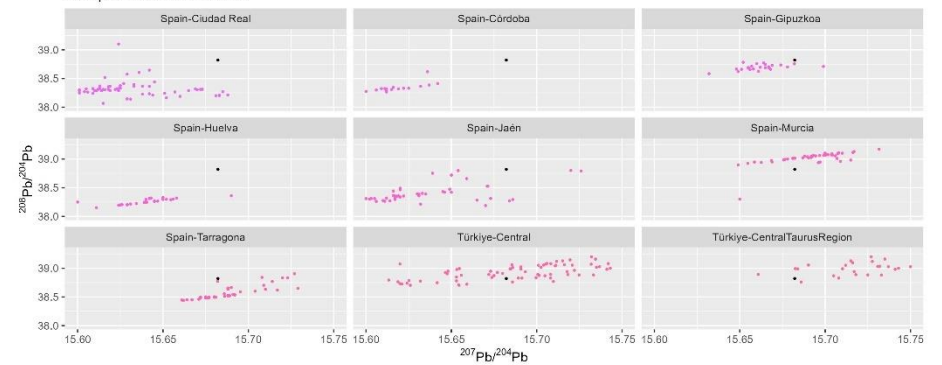

Sample 8-Denarius-80-1a

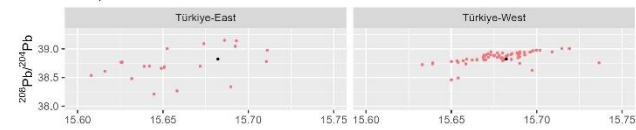

$^{207}\text{Pb}/^{204}\text{Pb}$

Sample 9-Denarius-Maiana

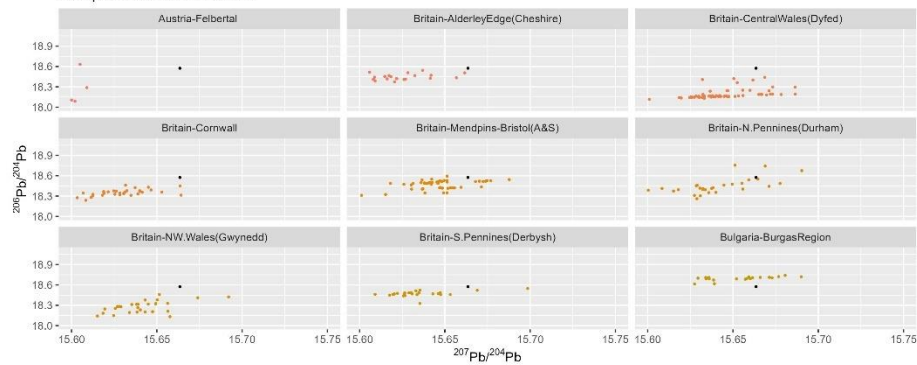

$^{207}\text{Pb}/^{204}\text{Pb}$

Sample 9-Denarius-Maiana

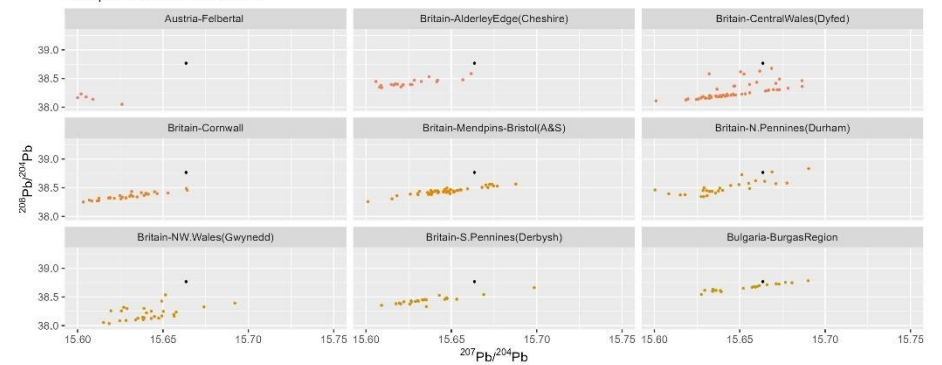

Sample 9-Denarius-Maiana

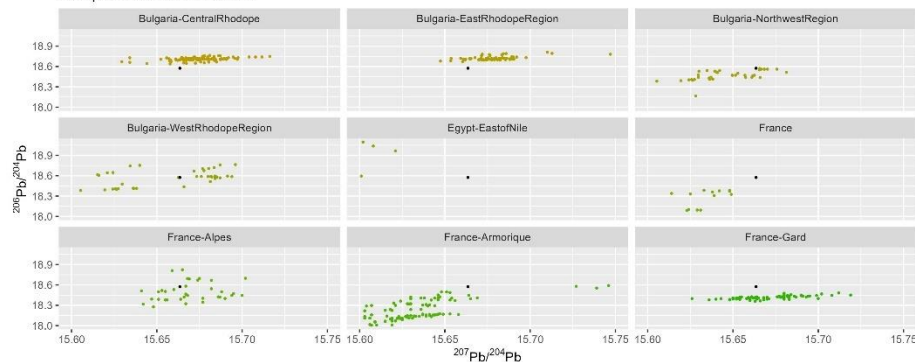

Sample 9-Denarius-Maiana

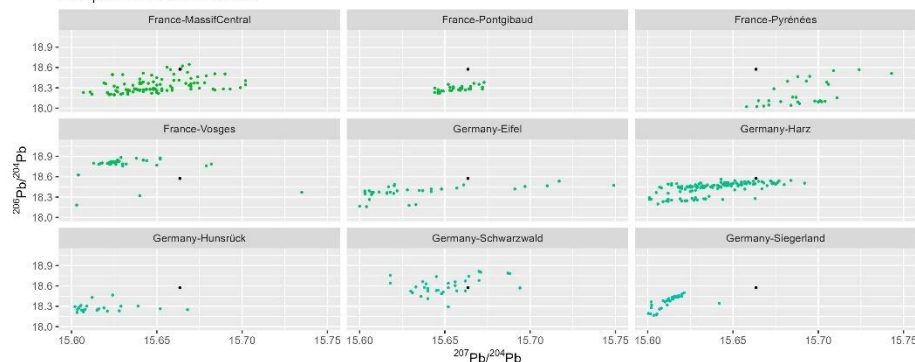

Sample 9-Denarius-Maiana

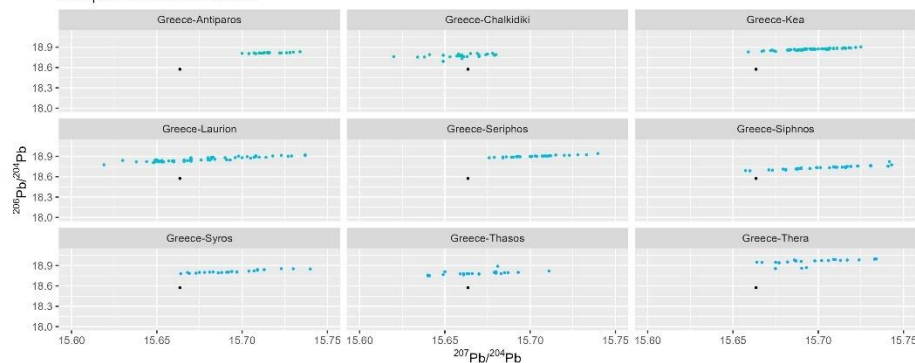

Sample 9-Denarius-Maiana

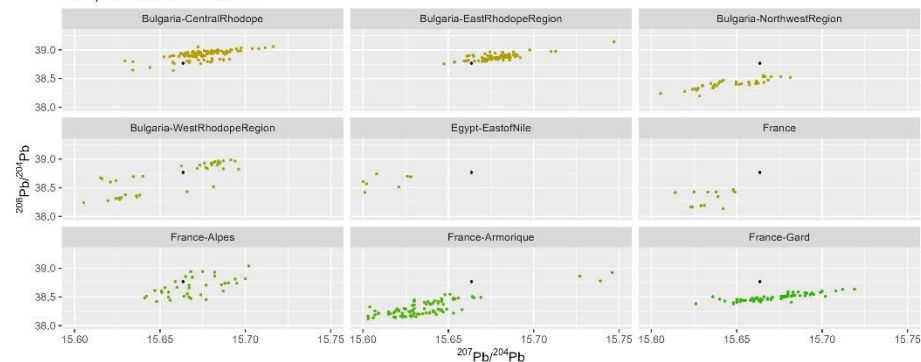

Sample 9-Denarius-Maiana

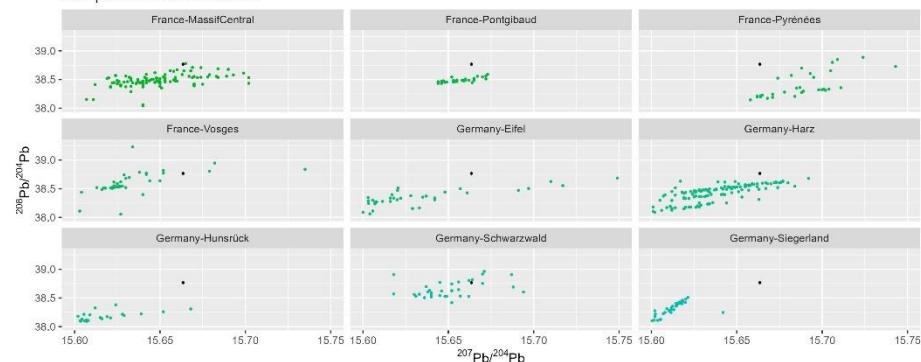

Sample 9-Denarius-Maiana

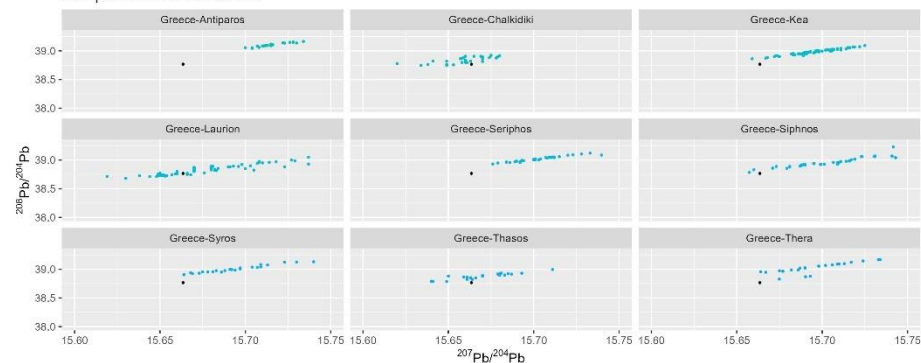



Sample 9-Denarius-Maiana

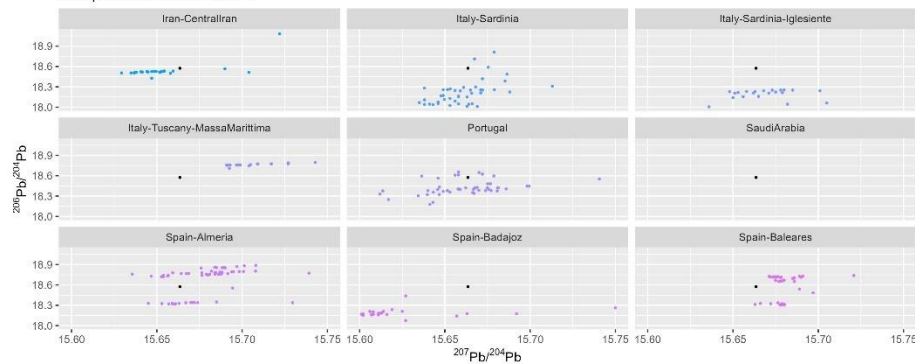

Sample 9-Denarius-Maiana

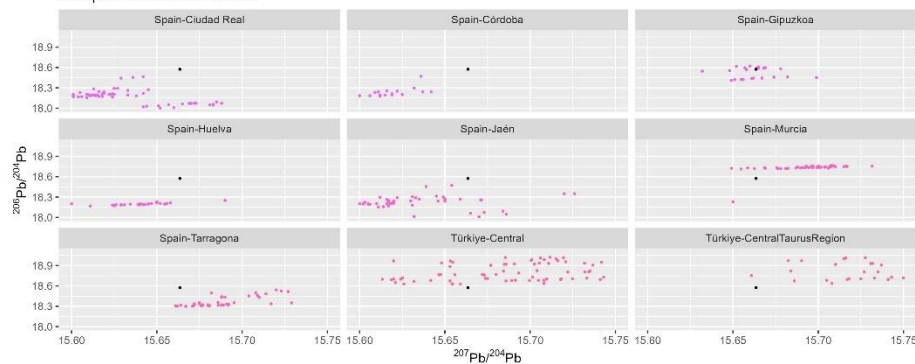

Sample 9-Denarius-Maiana

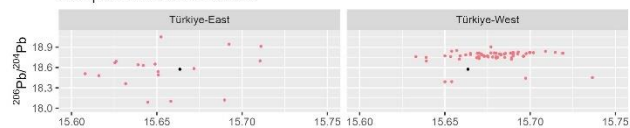

$^{207}\text{Pb}/^{204}\text{Pb}$

Sample 9-Denarius-Maiana

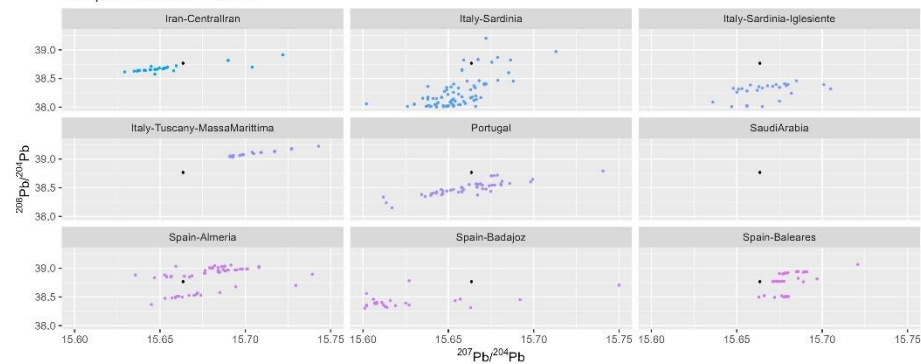

Sample 9-Denarius-Maiana

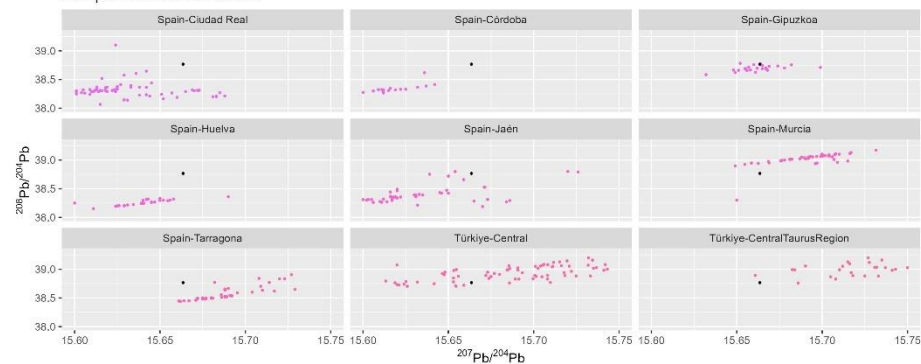

Sample 9-Denarius-Maiana

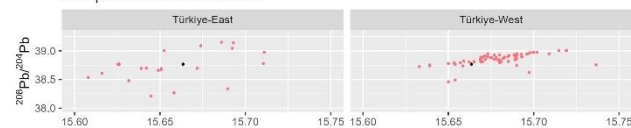

$^{207}\text{Pb}/^{204}\text{Pb}$

Sample 10-Denarius-53-2

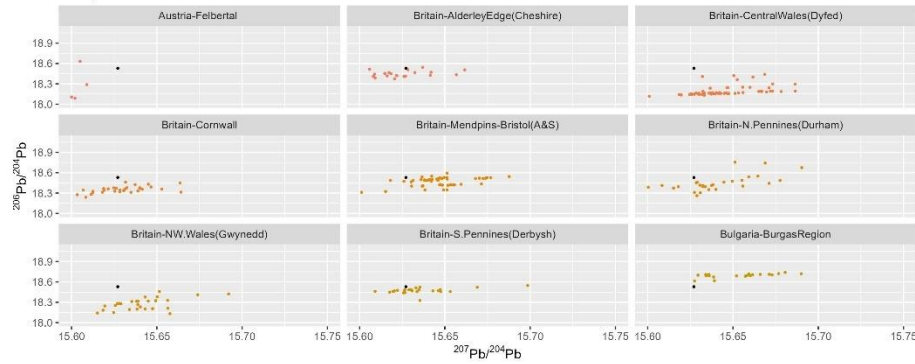

Sample 10-Denarius-53-2

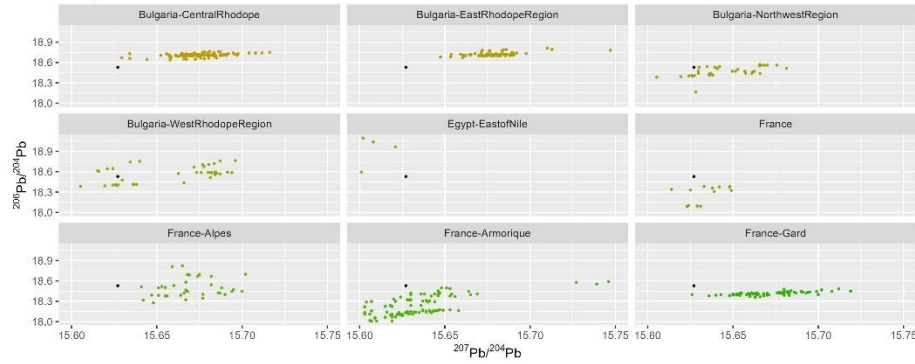

Sample 10-Denarius-53-2

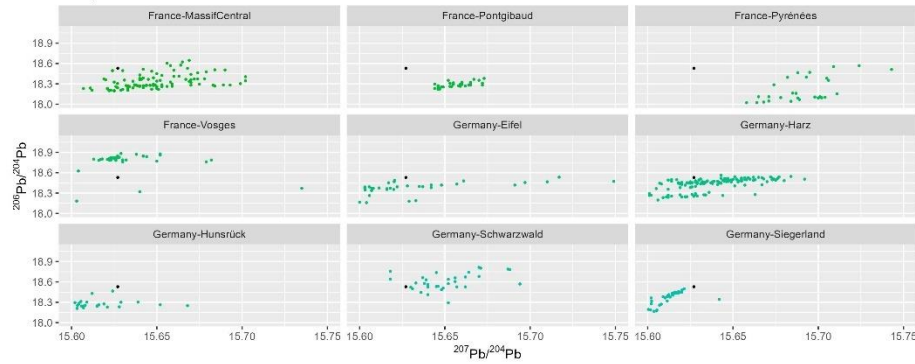

Sample 10-Denarius-53-2

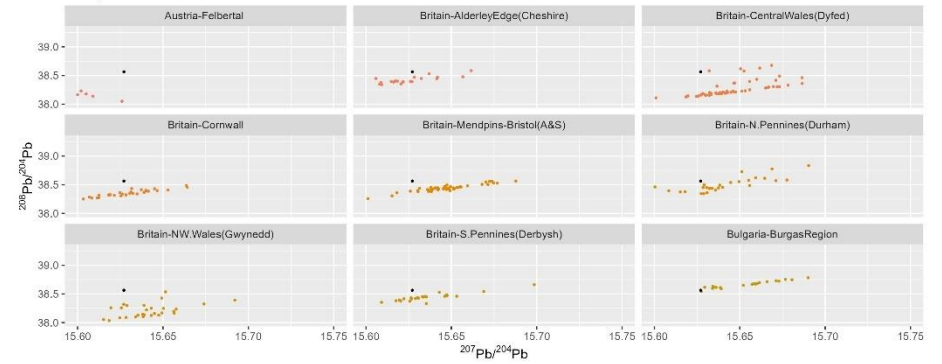

Sample 10-Denarius-53-2

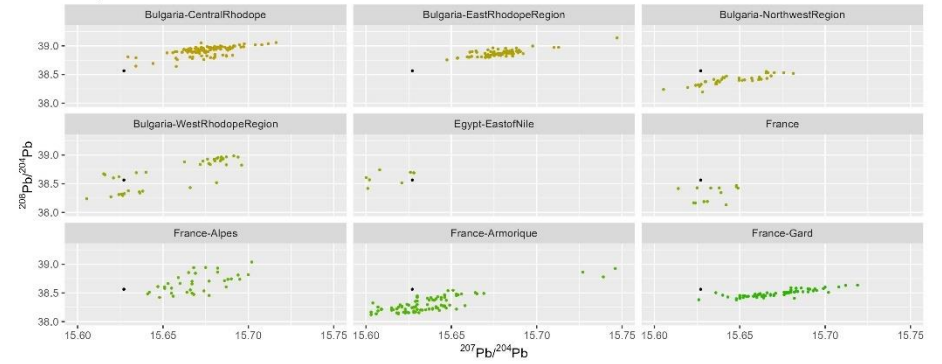

Sample 10-Denarius-53-2

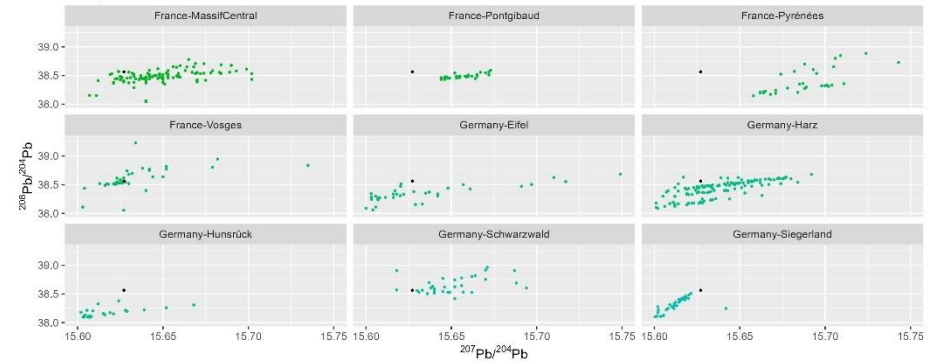

Sample 10-Denarius-53-2

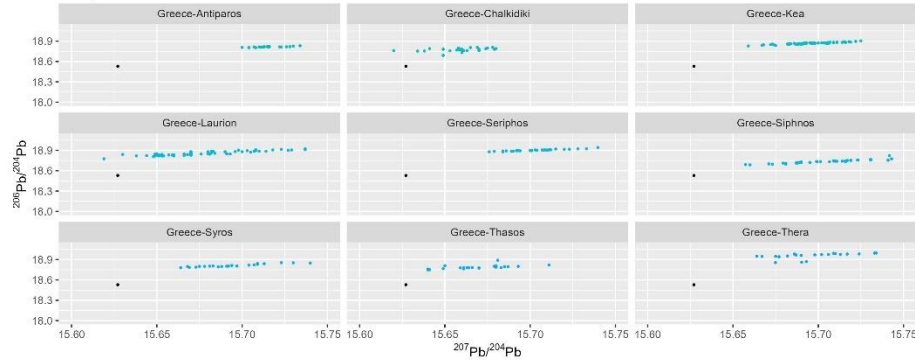

Sample 10-Denarius-53-2

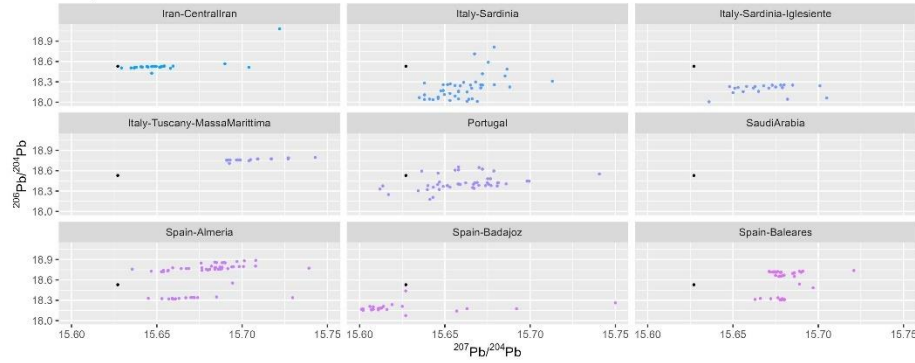

Sample 10-Denarius-53-2

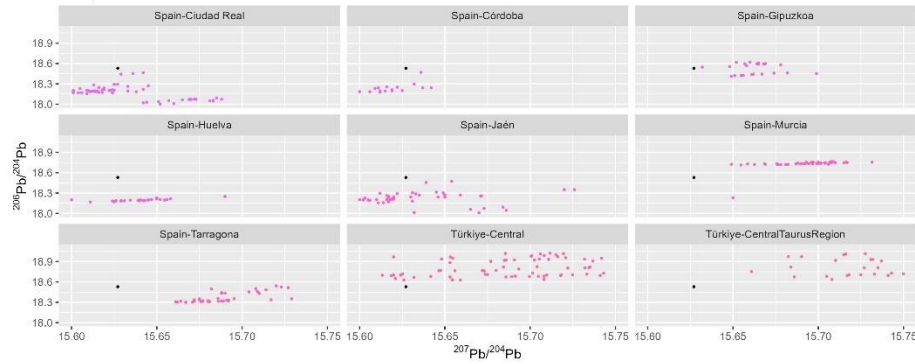

Sample 10-Denarius-53-2

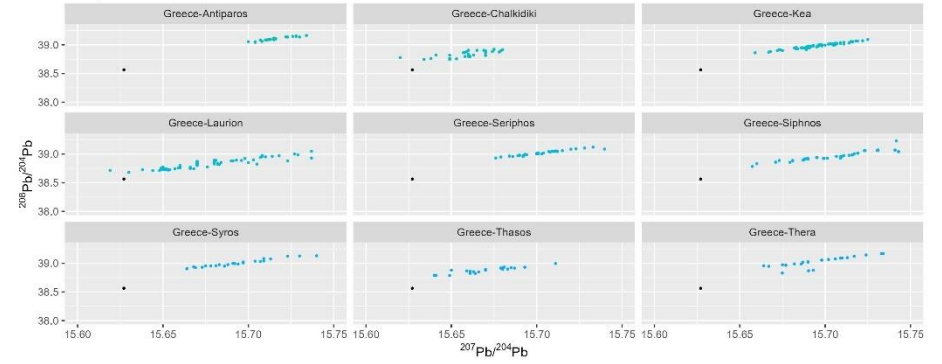

Sample 10-Denarius-53-2

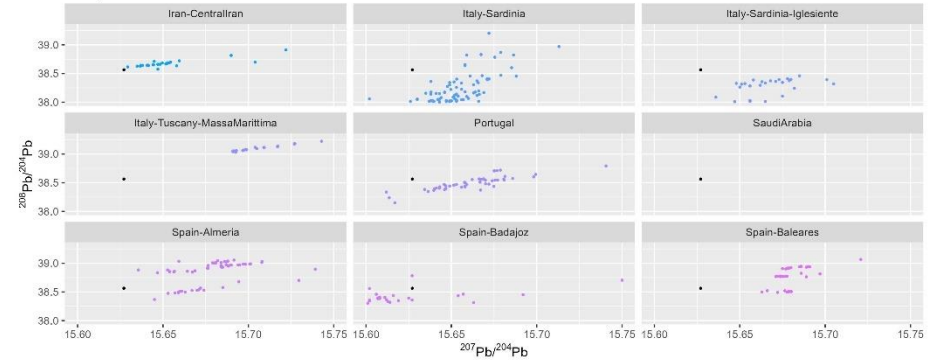

Sample 10-Denarius-53-2

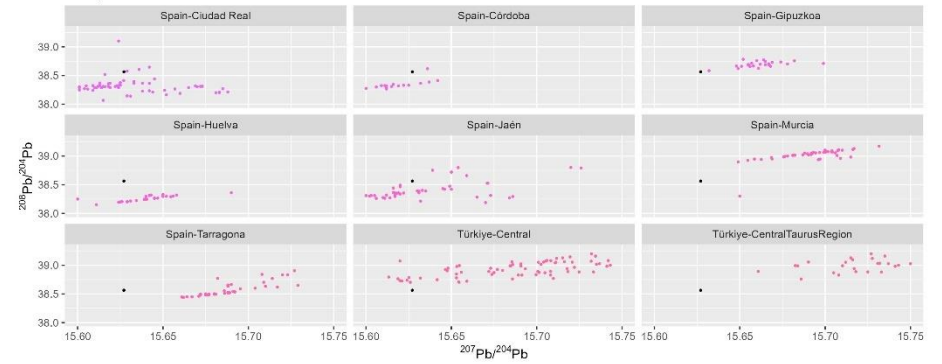

Sample 10-Denarius-53-2

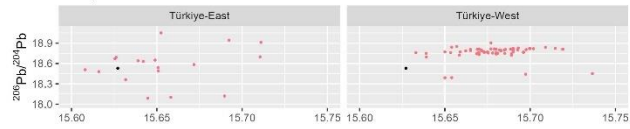

Sample 10-Denarius-53-2

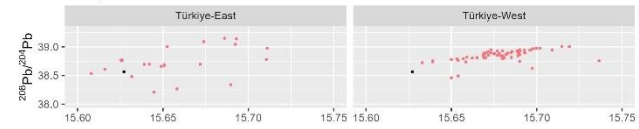

Sample 11-Denarius-44-5

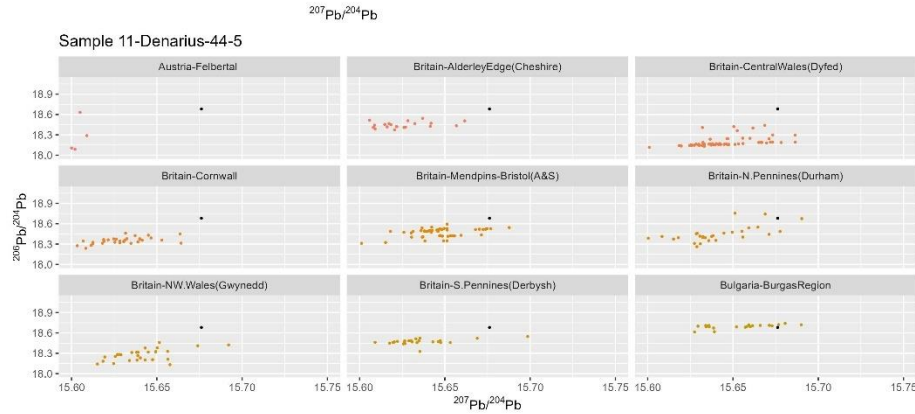

Sample 11-Denarius-44-5

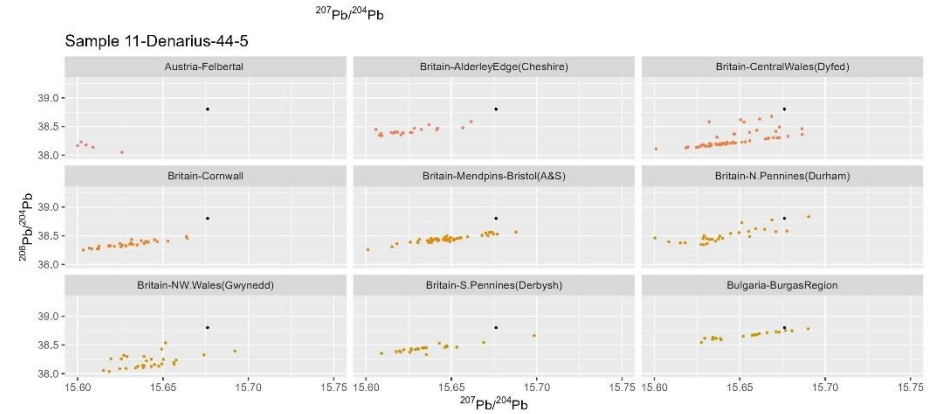

Sample 11-Denarius-44-5

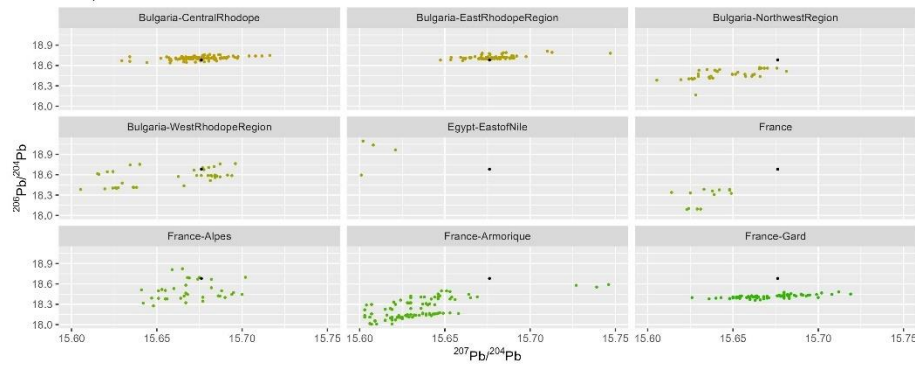

Sample 11-Denarius-44-5

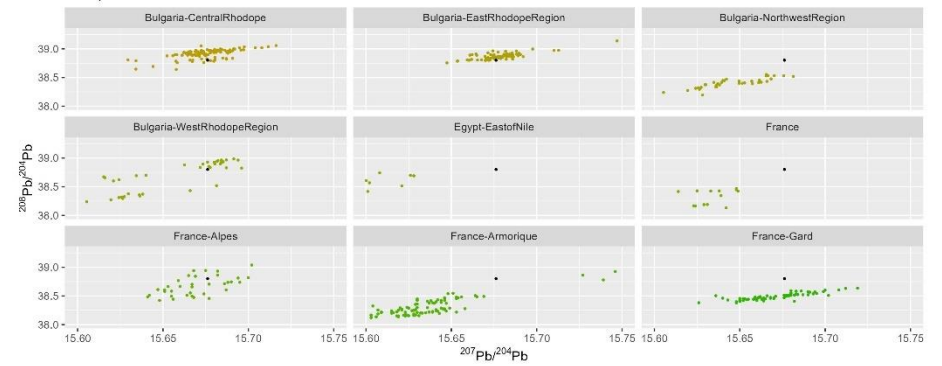



Sample 11-Denarius-44-5

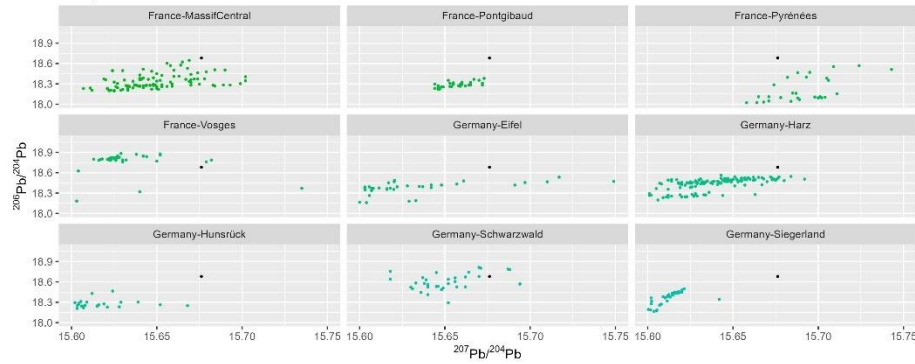

Sample 11-Denarius-44-5

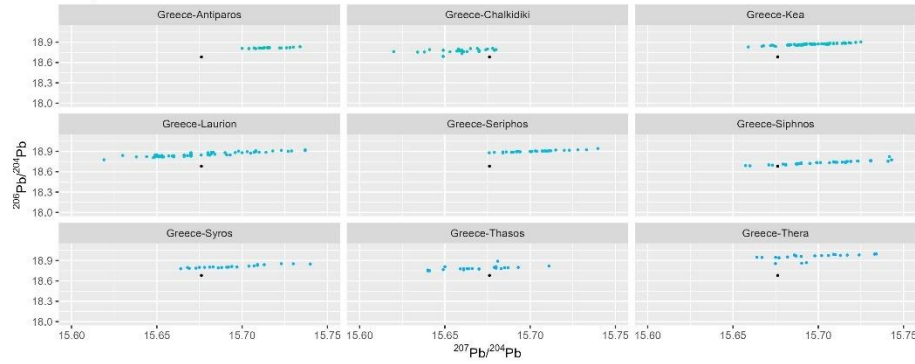

Sample 11-Denarius-44-5

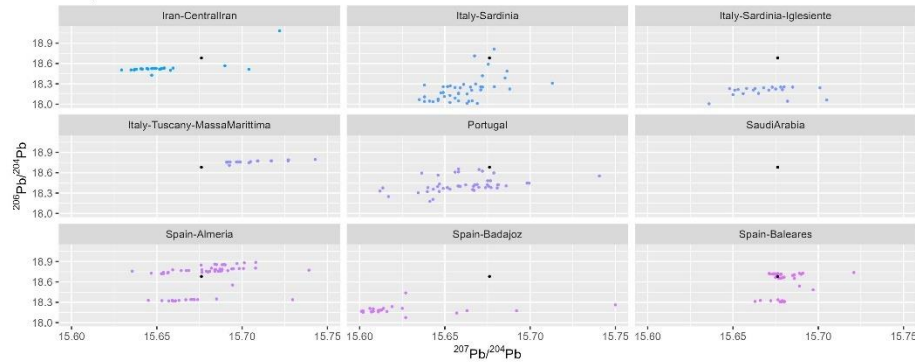

Sample 11-Denarius-44-5

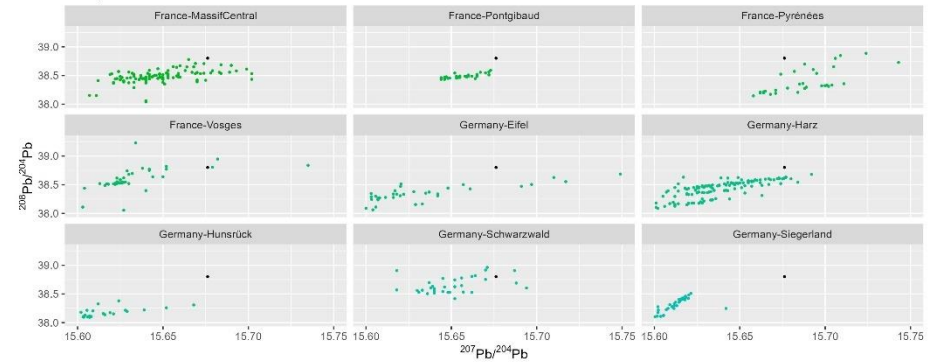

Sample 11-Denarius-44-5

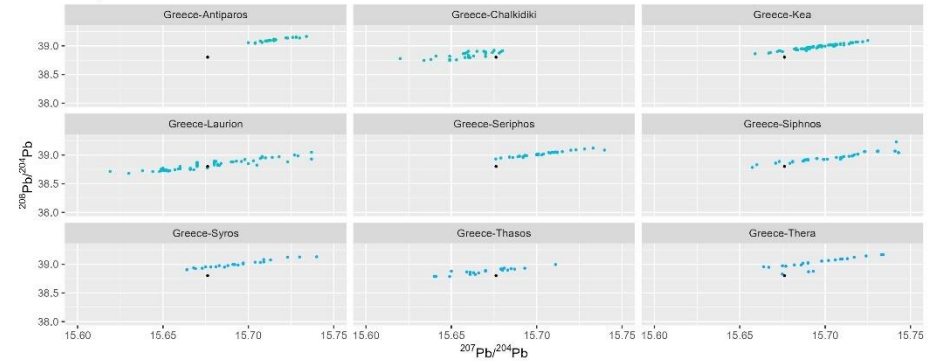

Sample 11-Denarius-44-5

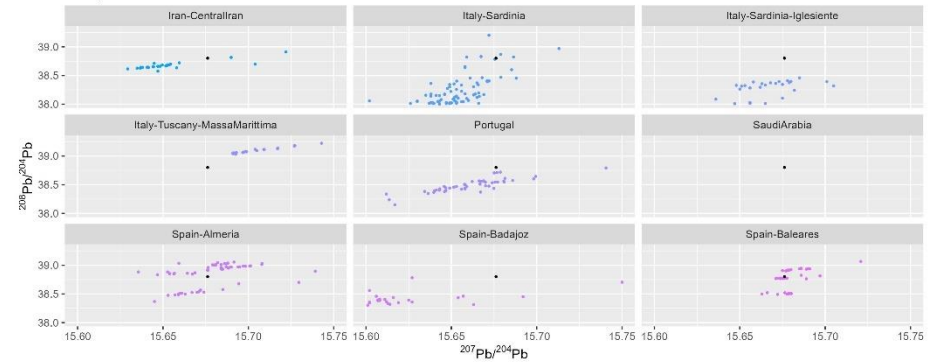

Sample 11-Denarius-44-5

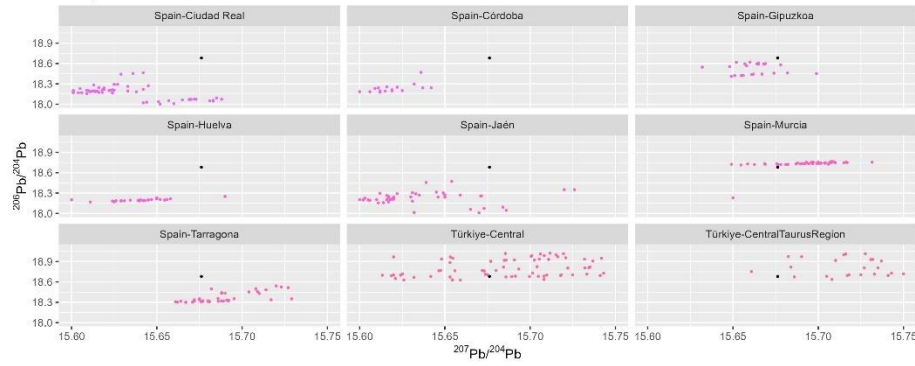

Sample 11-Denarius-44-5

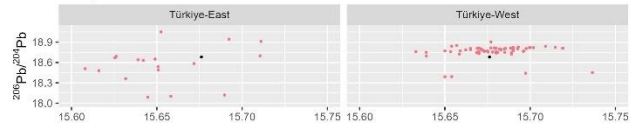

Sample 11-Denarius-44-5

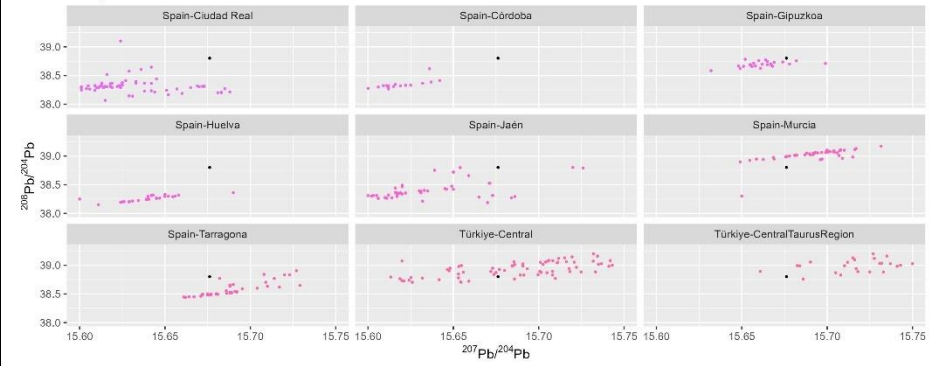

Sample 11-Denarius-44-5

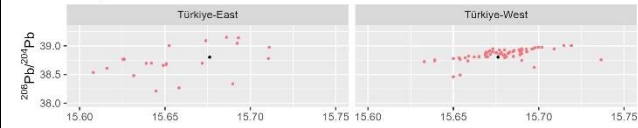

$^{207}\text{Pb}/^{204}\text{Pb}$

Sample 12-Denarius-113-1

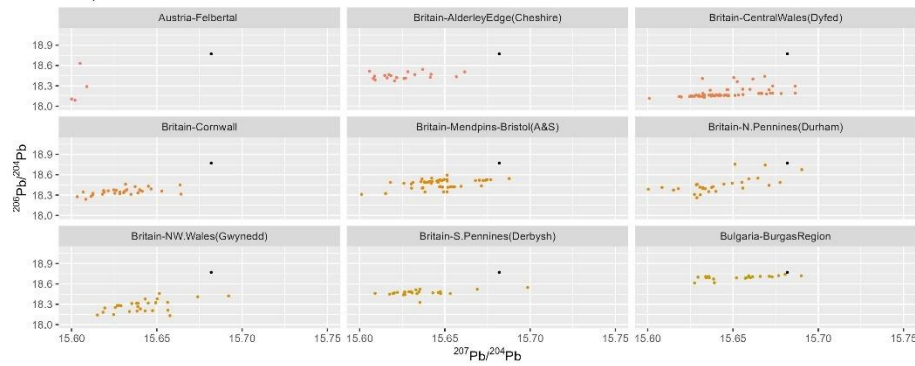

$^{207}\text{Pb}/^{204}\text{Pb}$

Sample 12-Denarius-113-1

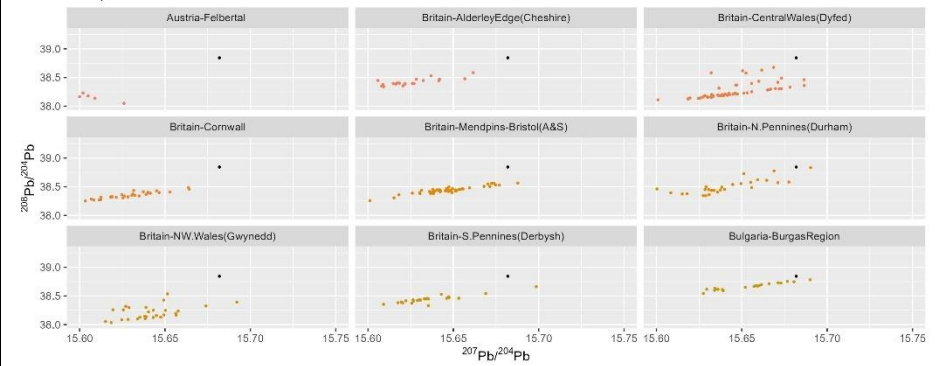

Sample 12-Denarius-113-1

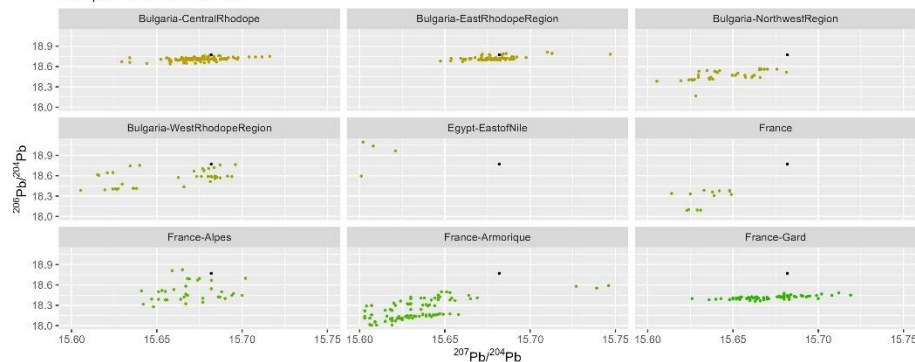

Sample 12-Denarius-113-1

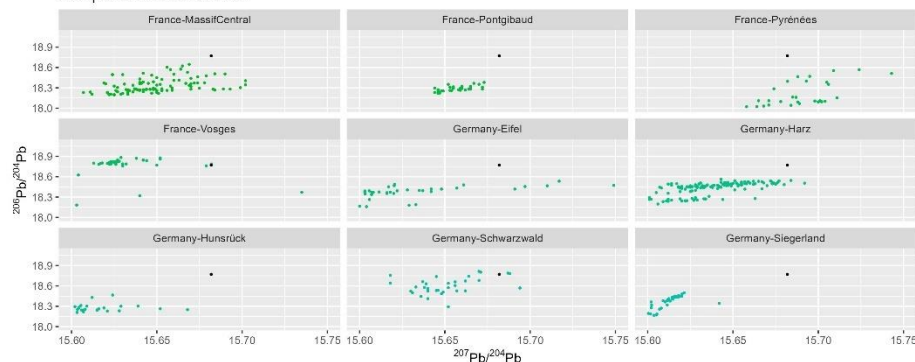

Sample 12-Denarius-113-1

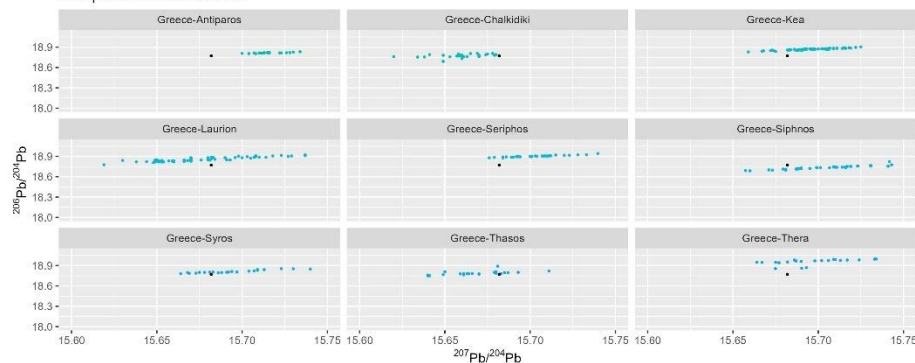

Sample 12-Denarius-113-1

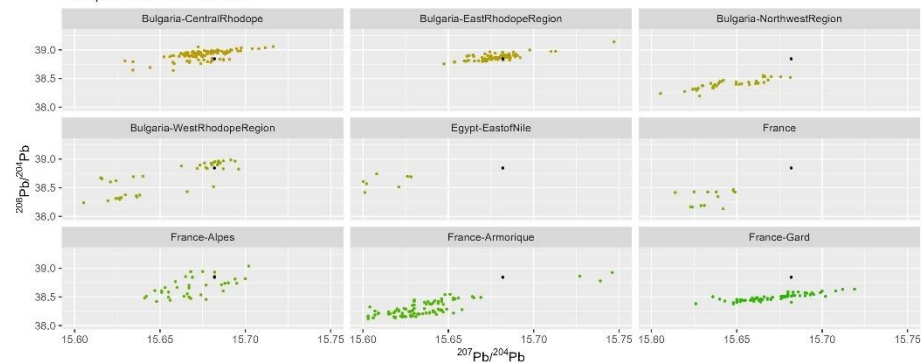

Sample 12-Denarius-113-1

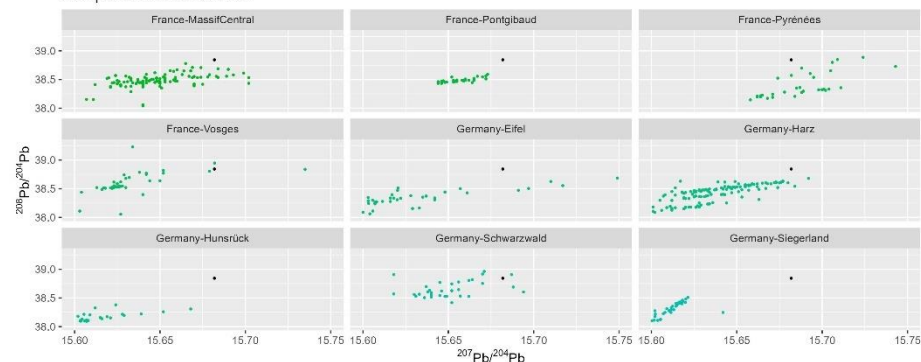

Sample 12-Denarius-113-1

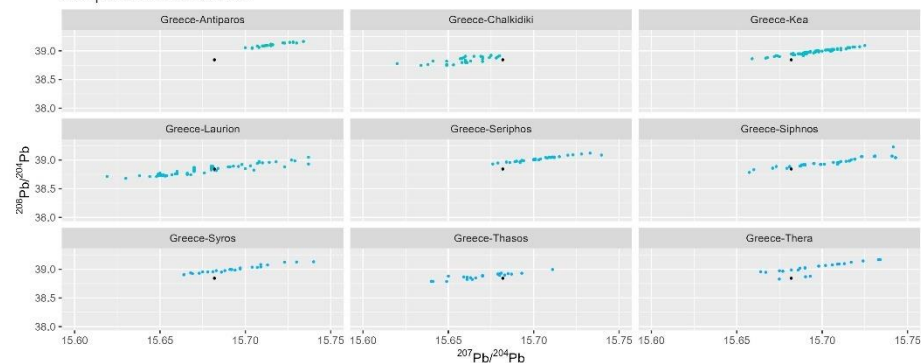

Sample 12-Denarius-113-1

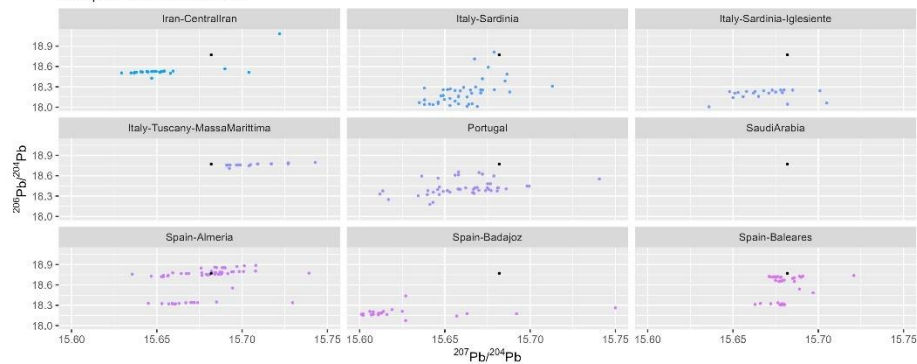

Sample 12-Denarius-113-1

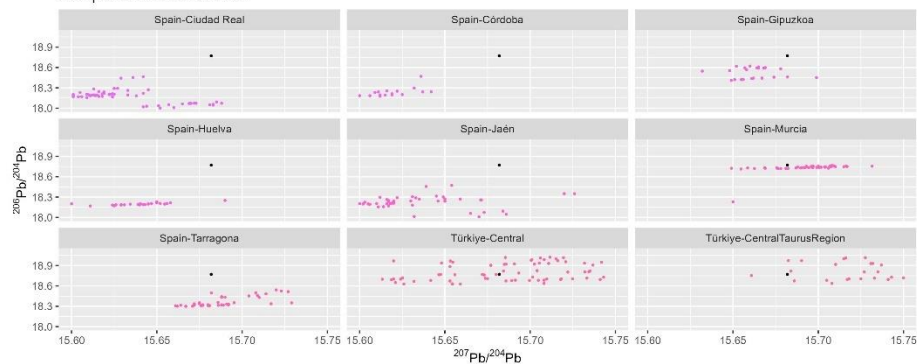

Sample 12-Denarius-113-1

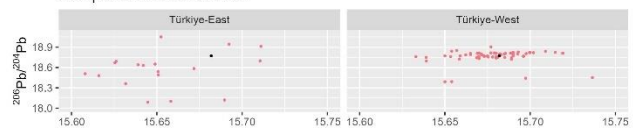

$^{207}\text{Pb}/^{204}\text{Pb}$

Sample 12-Denarius-113-1

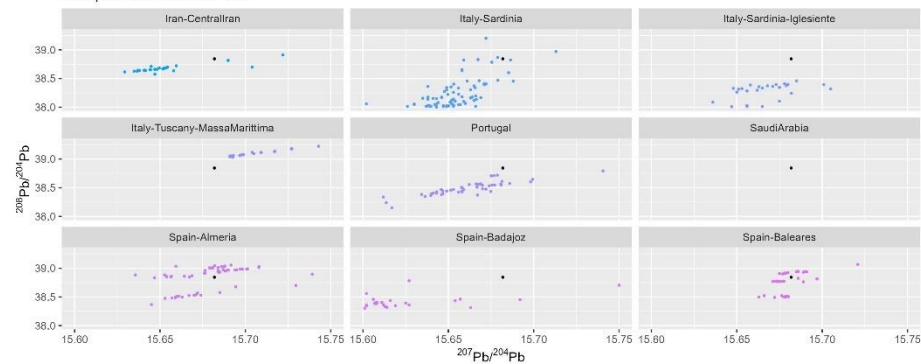

Sample 12-Denarius-113-1

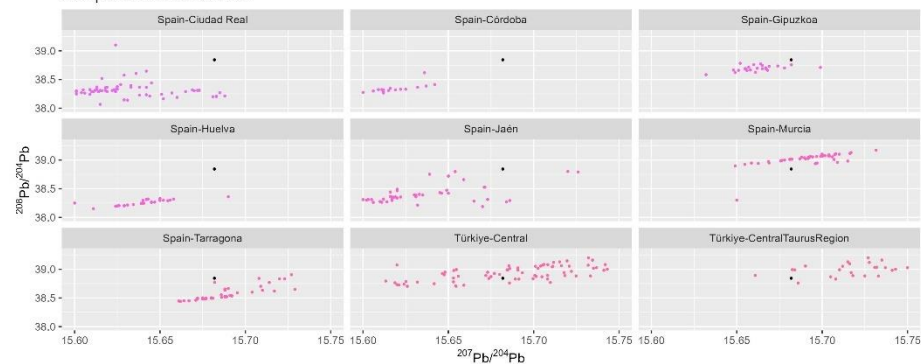

Sample 12-Denarius-113-1

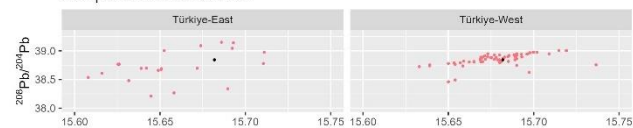

$^{207}\text{Pb}/^{204}\text{Pb}$



Sample 13-Denarius-197-1a-b

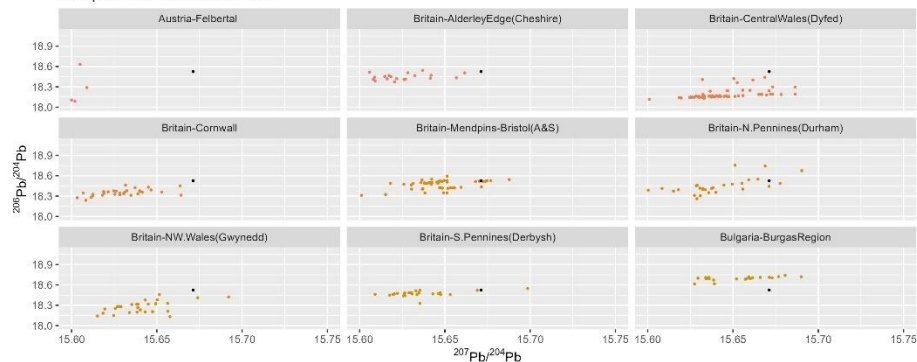

Sample 13-Denarius-197-1a-b

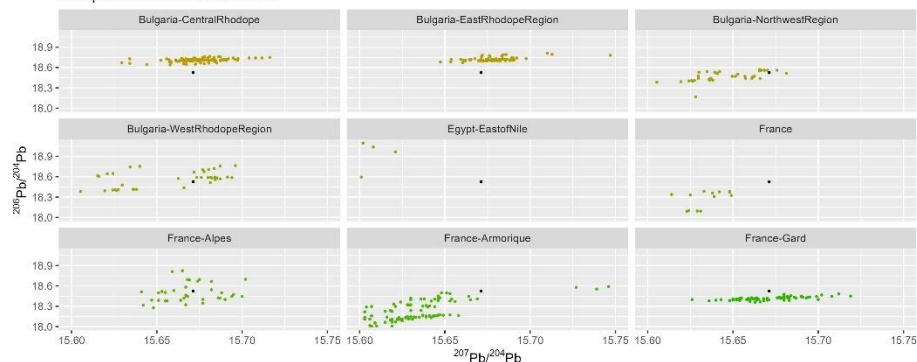

Sample 13-Denarius-197-1a-b

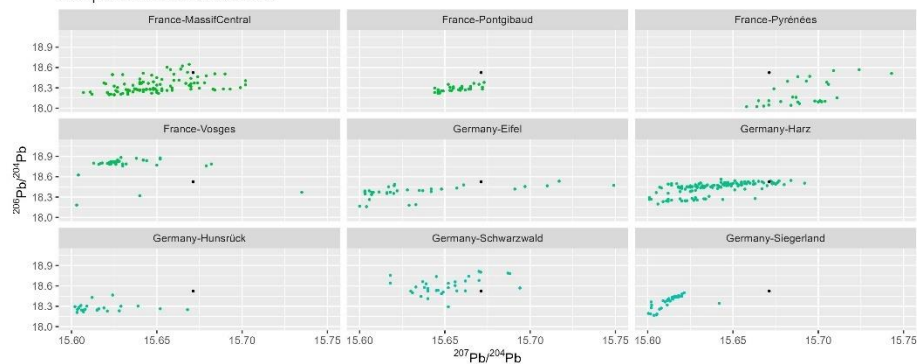

Sample 13-Denarius-197-1a-b

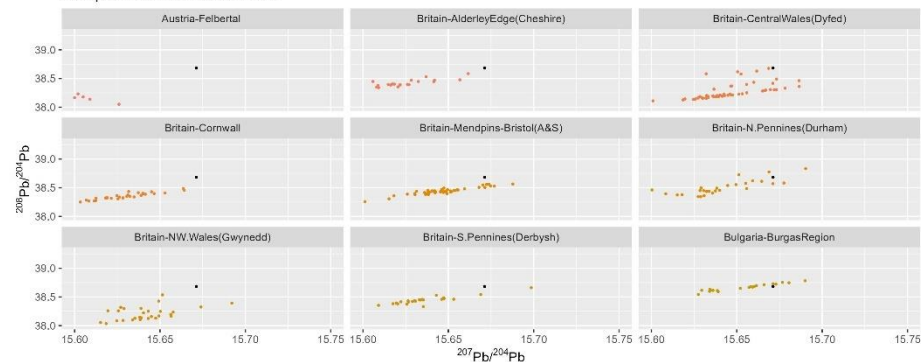

Sample 13-Denarius-197-1a-b

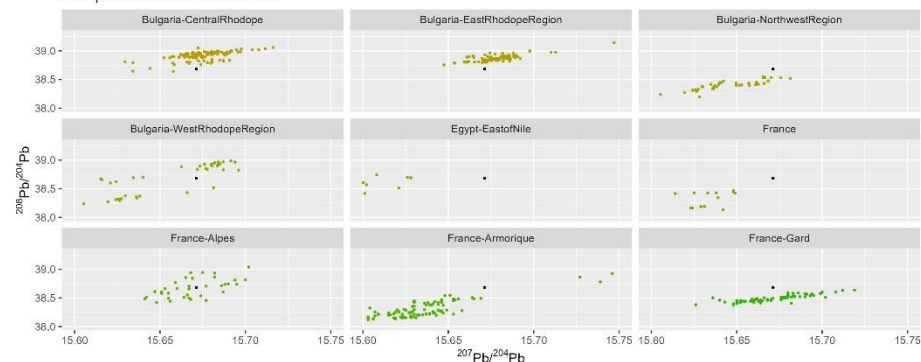

Sample 13-Denarius-197-1a-b

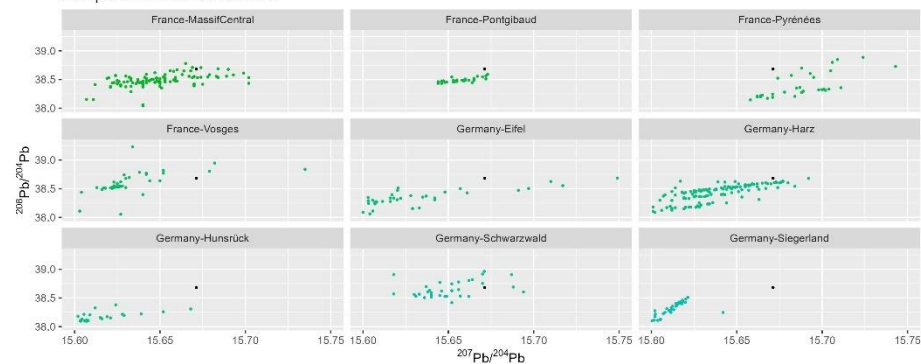

Sample 13-Denarius-197-1a-b

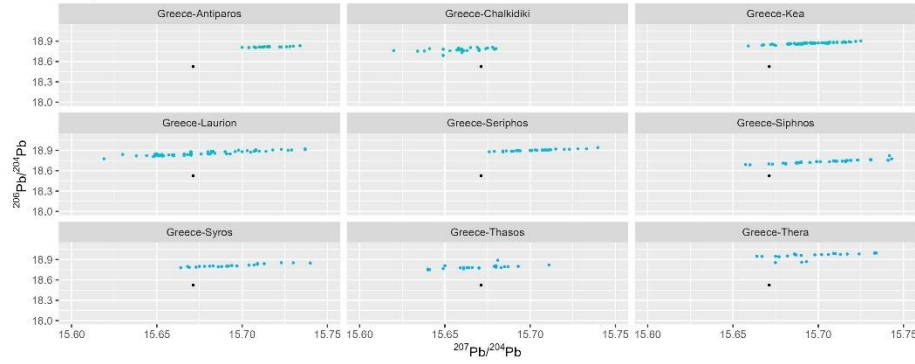

Sample 13-Denarius-197-1a-b

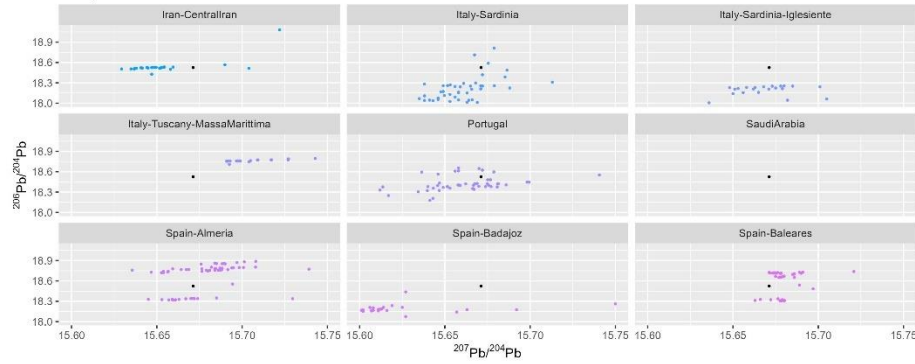

Sample 13-Denarius-197-1a-b

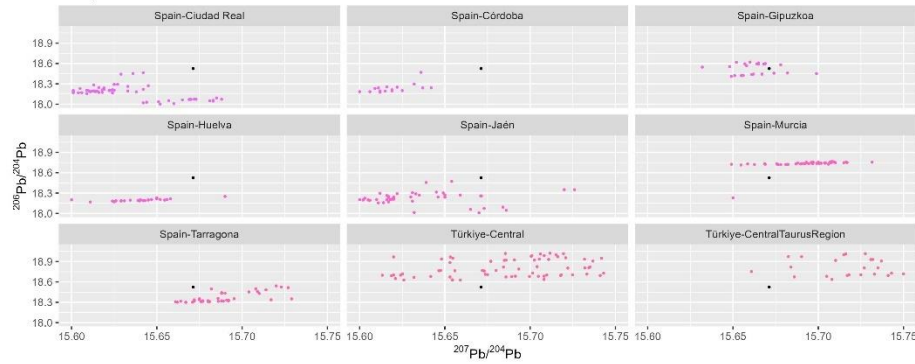

Sample 13-Denarius-197-1a-b

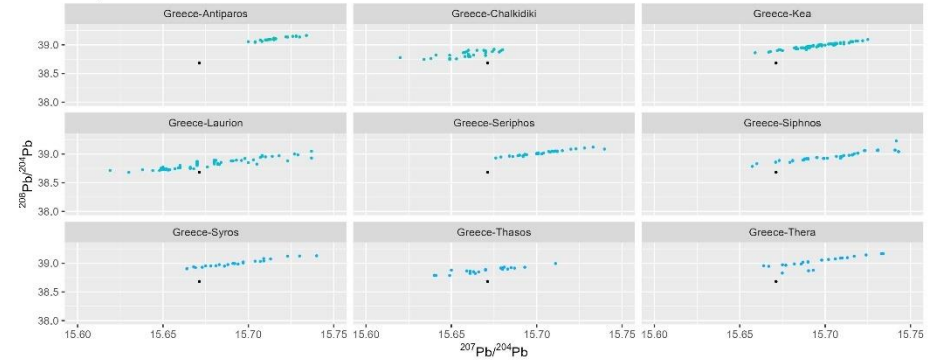

Sample 13-Denarius-197-1a-b

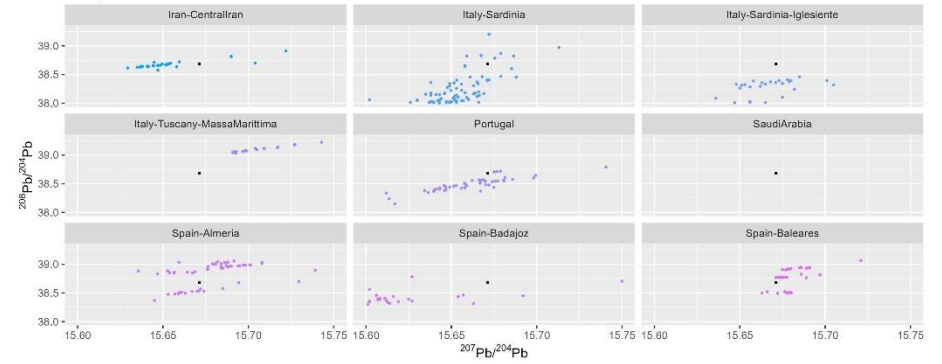

Sample 13-Denarius-197-1a-b

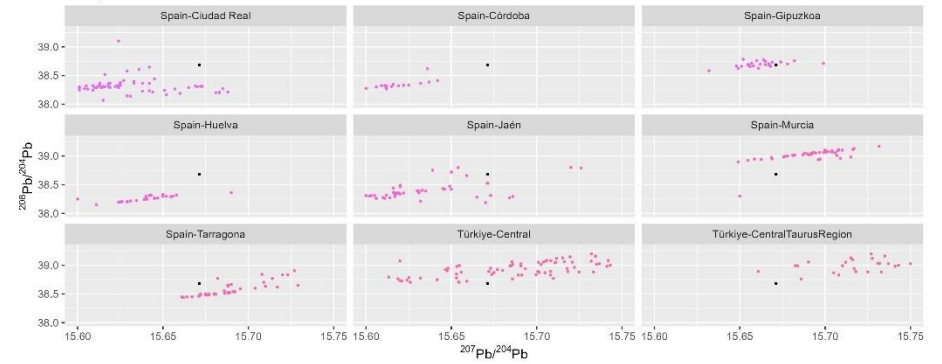

Sample 13-Denarius-197-1a-b

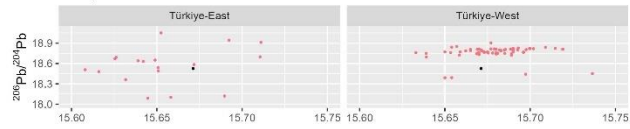

Sample 14-Quinarius-97-2

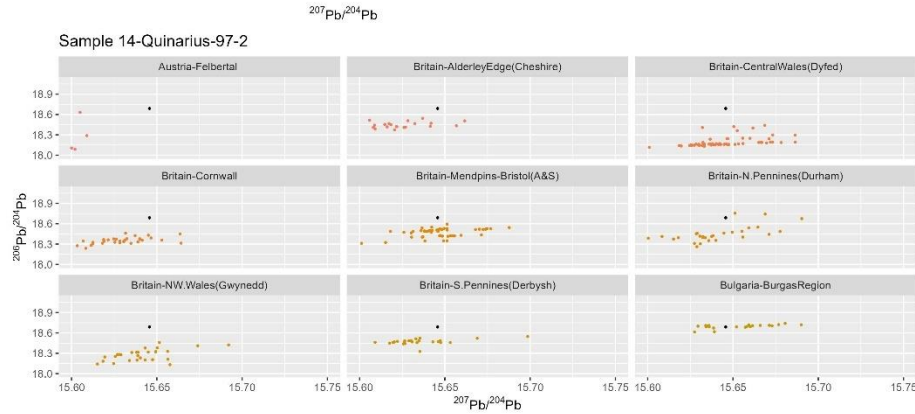

Sample 14-Quinarius-97-2

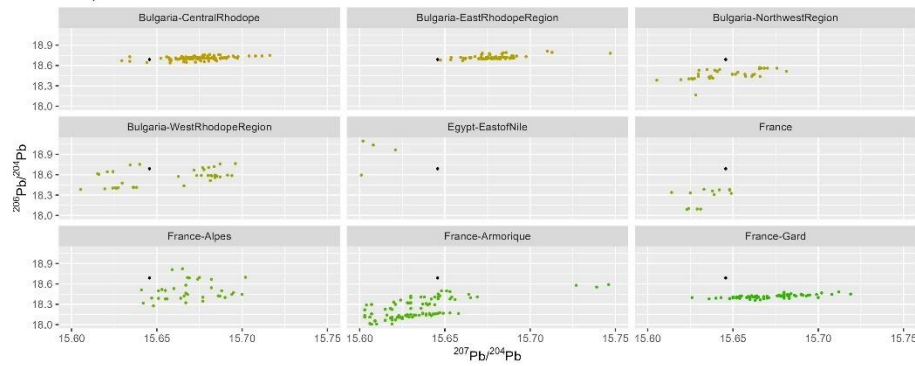

Sample 13-Denarius-197-1a-b

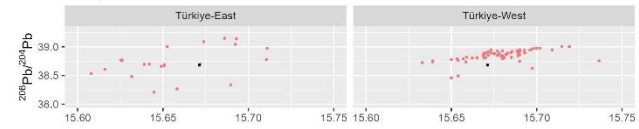

Sample 14-Quinarius-97-2

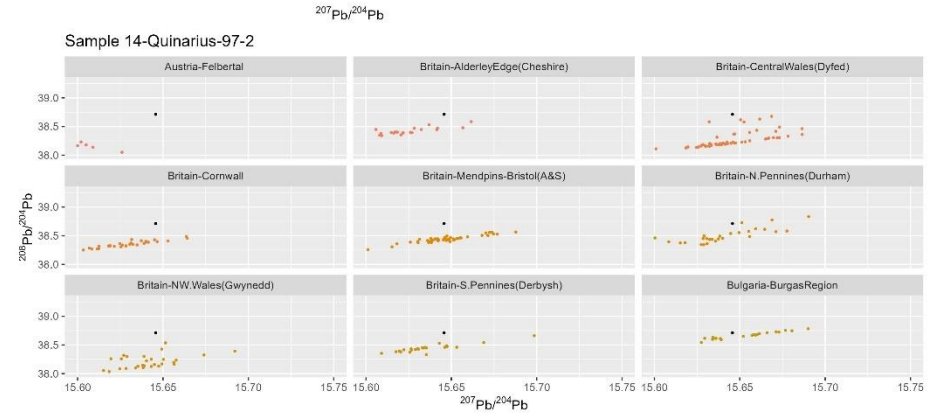

Sample 14-Quinarius-97-2

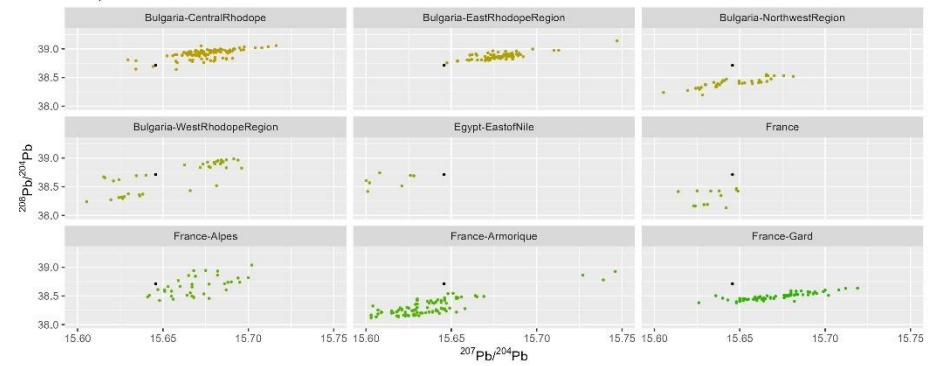

Sample 14-Quinarius-97-2

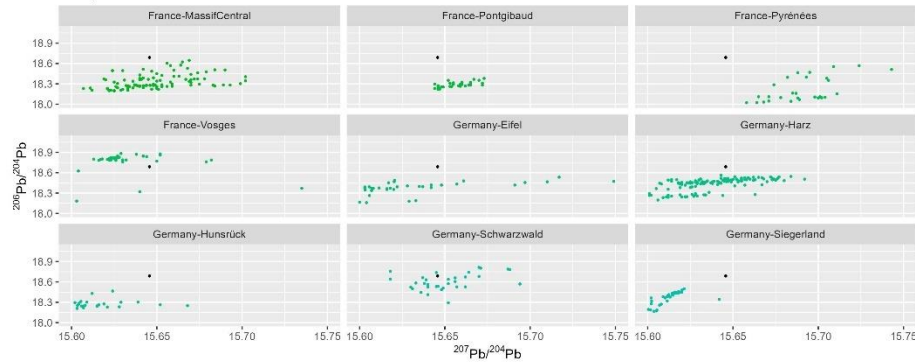

Sample 14-Quinarius-97-2

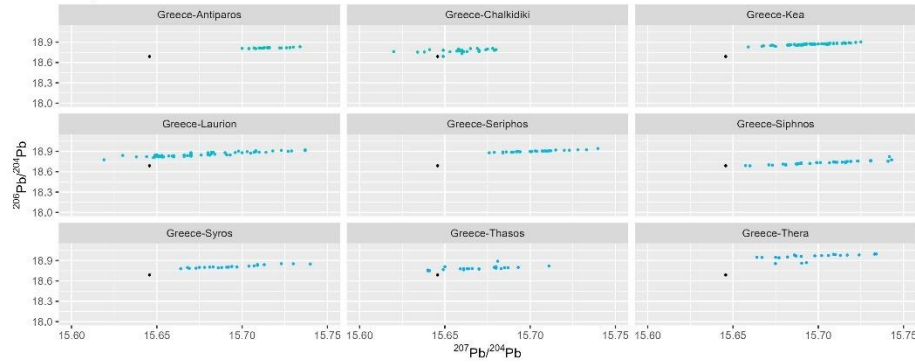

Sample 14-Quinarius-97-2

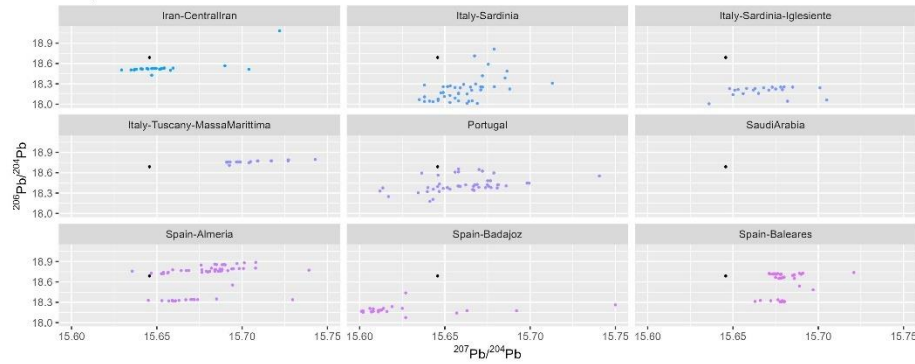

Sample 14-Quinarius-97-2

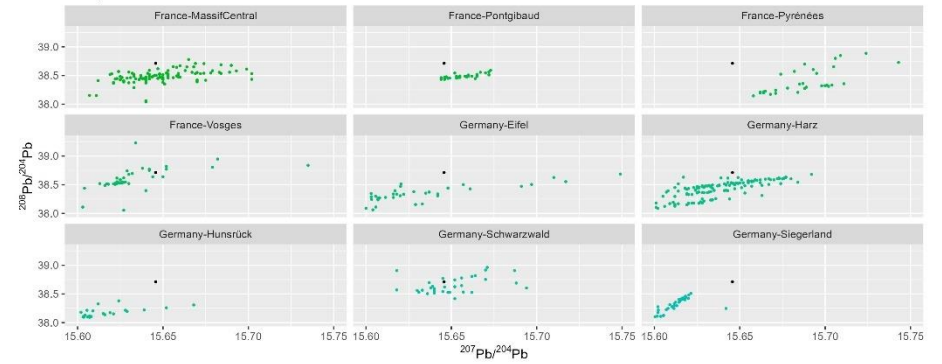

Sample 14-Quinarius-97-2

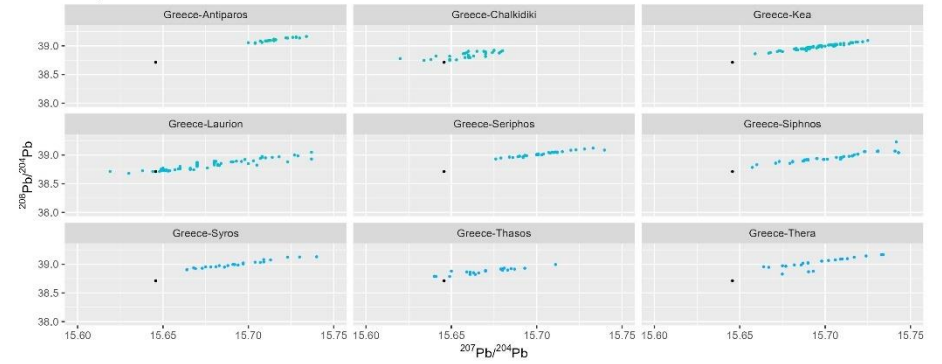

Sample 14-Quinarius-97-2

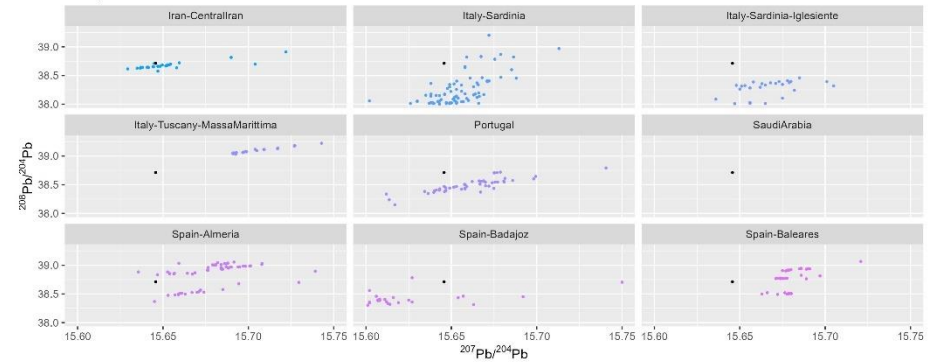



Sample 14-Quinarius-97-2

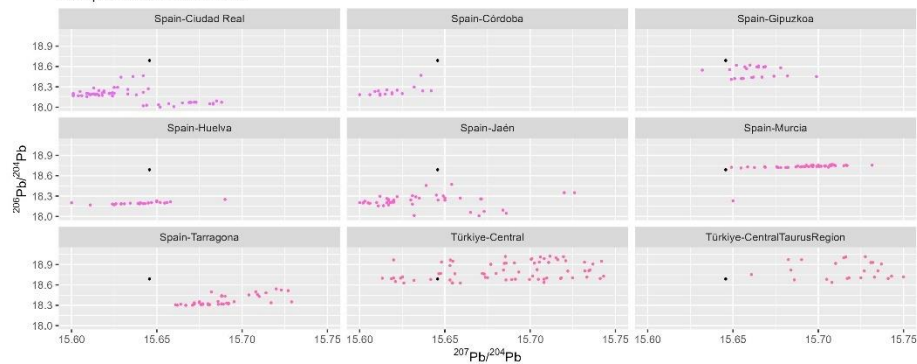

Sample 14-Quinarius-97-2

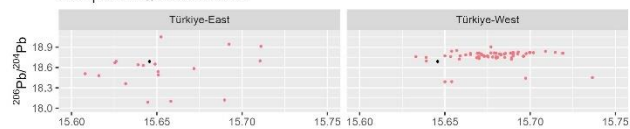

Sample 14-Quinarius-97-2

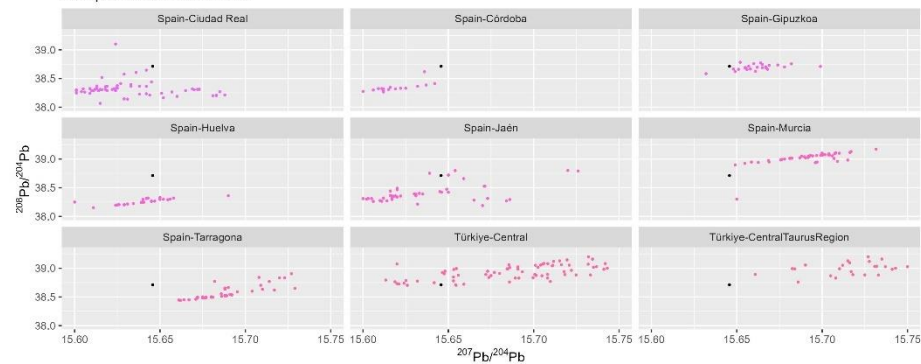

Sample 14-Quinarius-97-2

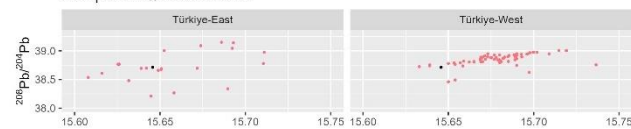

$^{207}\text{Pb}/^{204}\text{Pb}$

Sample 15-Janus-29-3

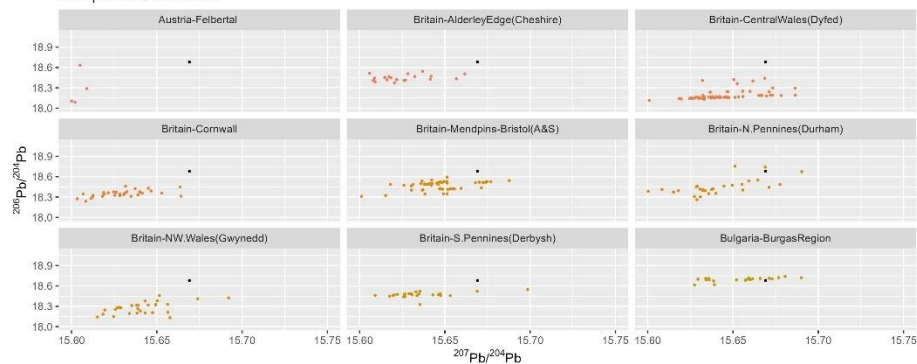

$^{207}\text{Pb}/^{204}\text{Pb}$

Sample 15-Janus-29-3

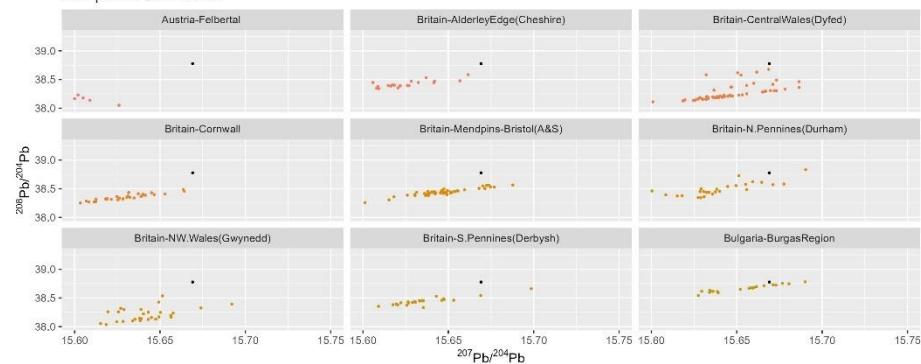

Sample 15-Janus-29-3

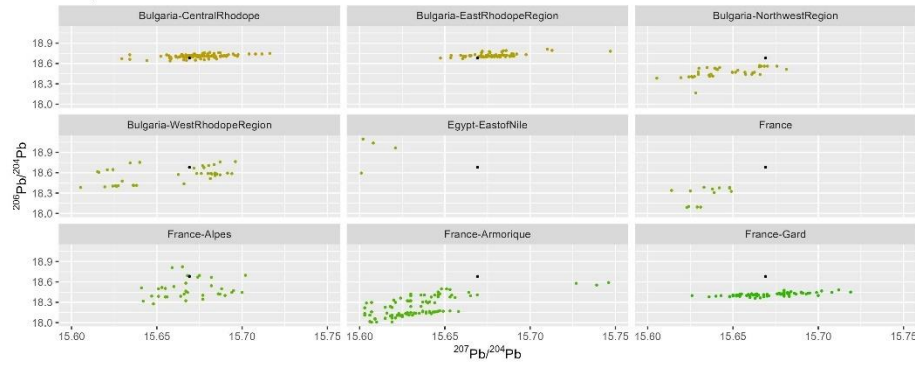

Sample 15-Janus-29-3

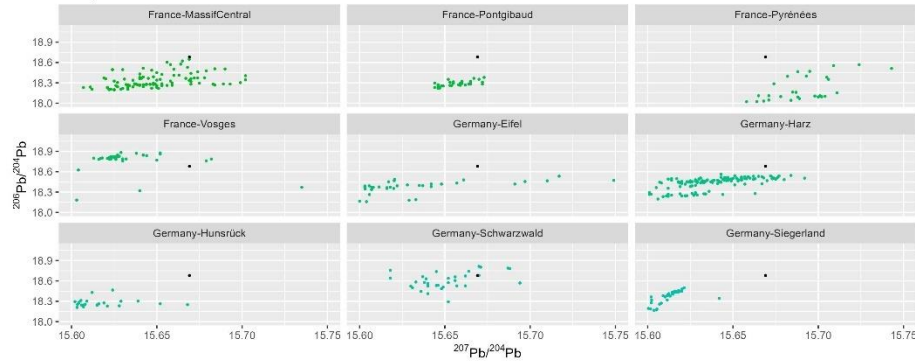

Sample 15-Janus-29-3

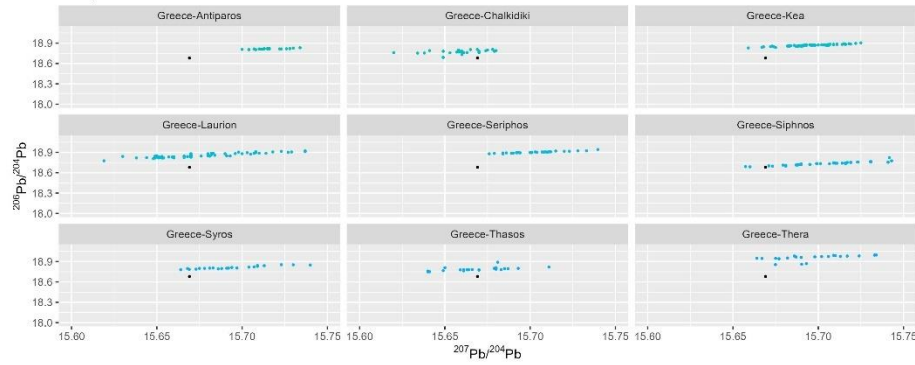

Sample 15-Janus-29-3

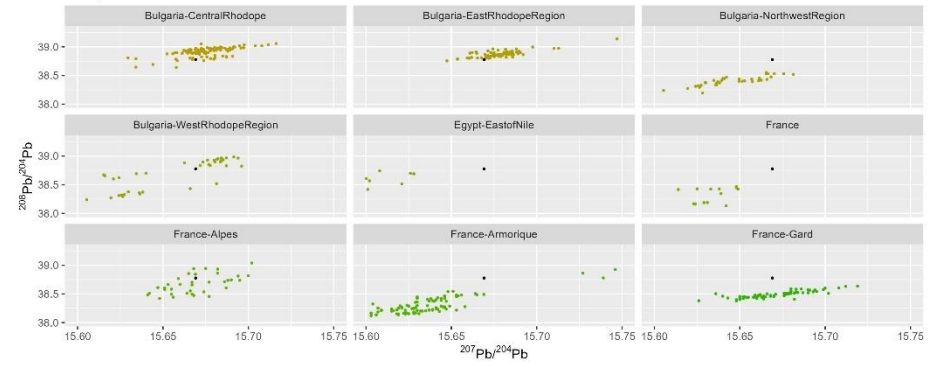

Sample 15-Janus-29-3

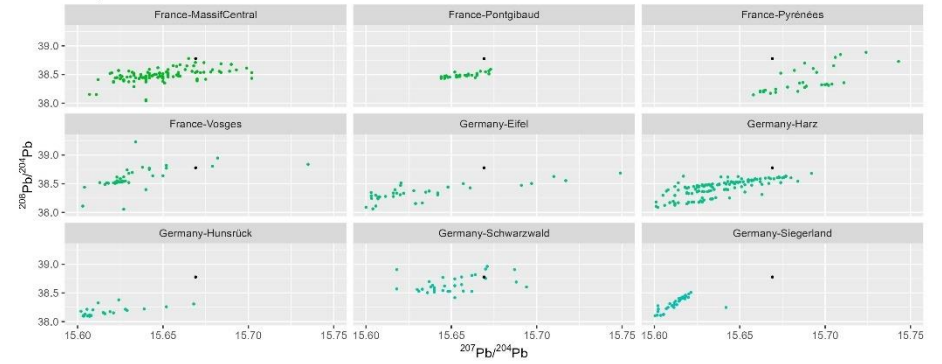

Sample 15-Janus-29-3

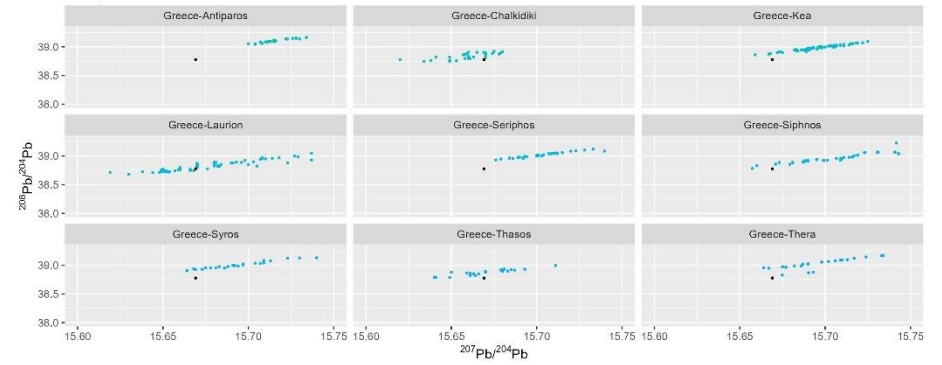

Sample 15-Janus-29-3

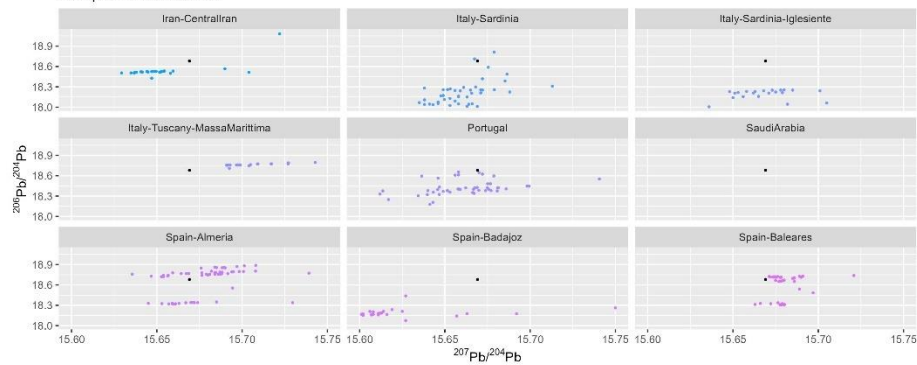

Sample 15-Janus-29-3

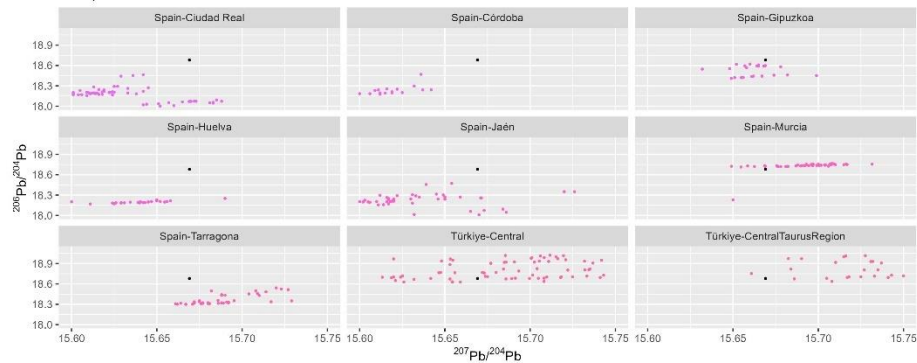

Sample 15-Janus-29-3

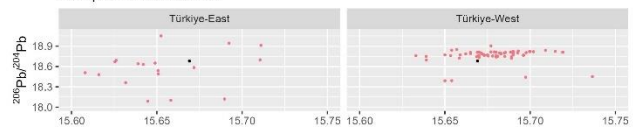

207Pb/204Pb

Sample 15-Janus-29-3

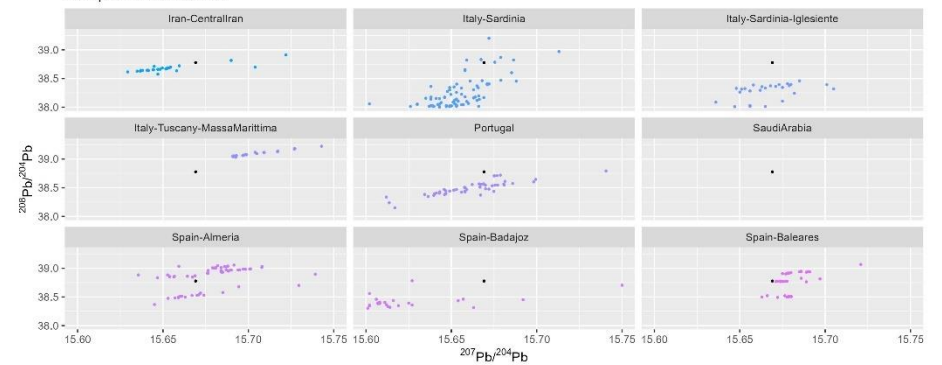

Sample 15-Janus-29-3

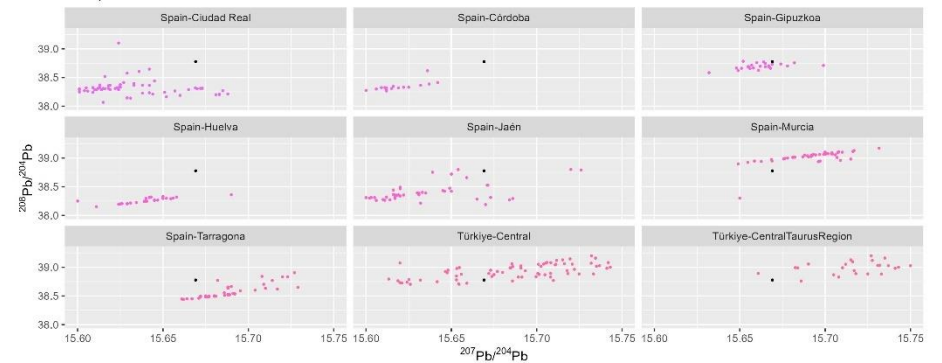

Sample 15-Janus-29-3

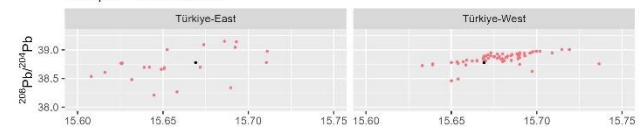

207Pb/204Pb

Sample 16-Denarius-60-1

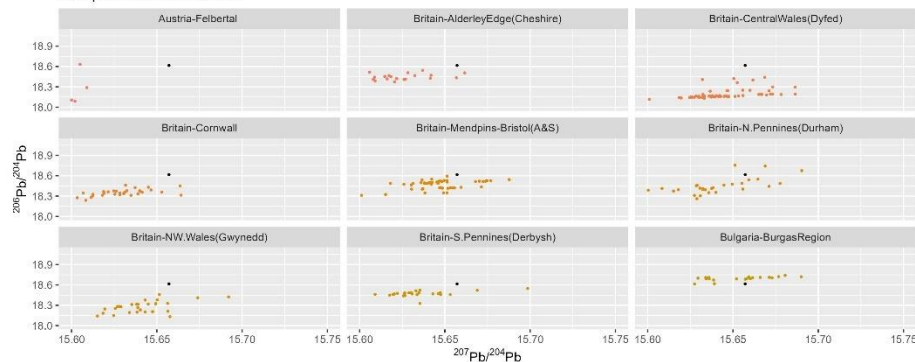

Sample 16-Denarius-60-1

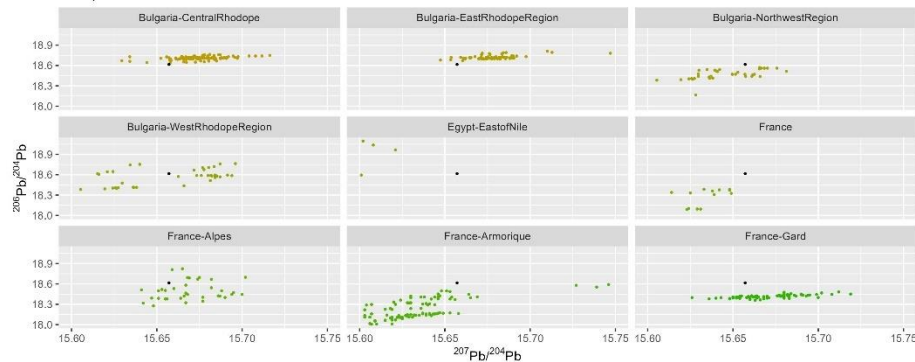

Sample 16-Denarius-60-1

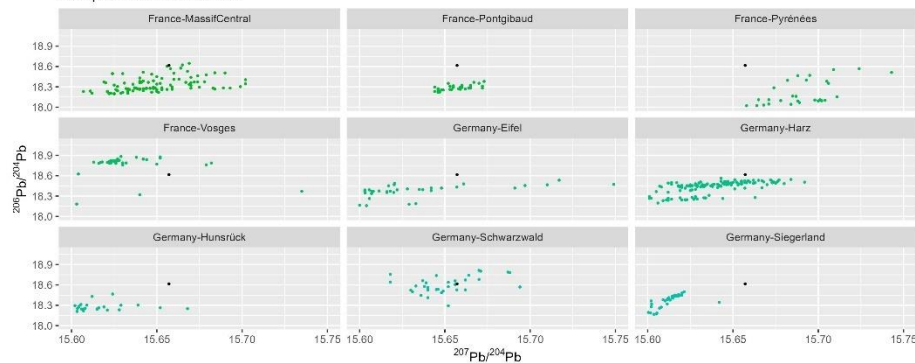

Sample 16-Denarius-60-1

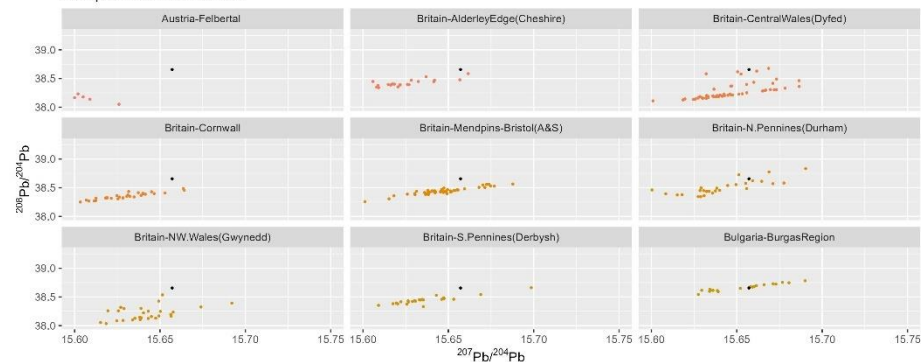

Sample 16-Denarius-60-1

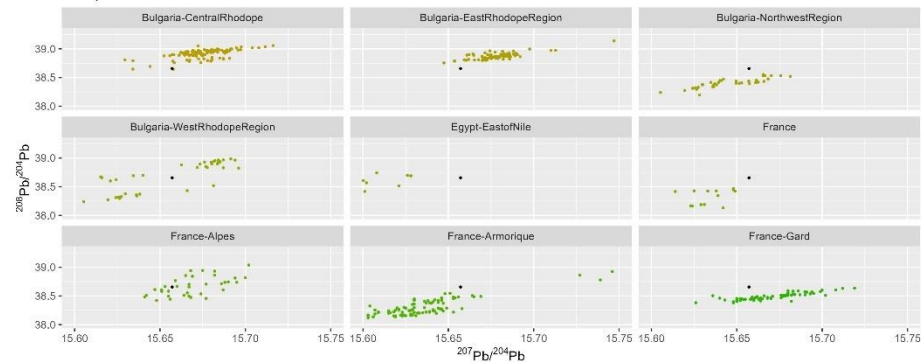

Sample 16-Denarius-60-1

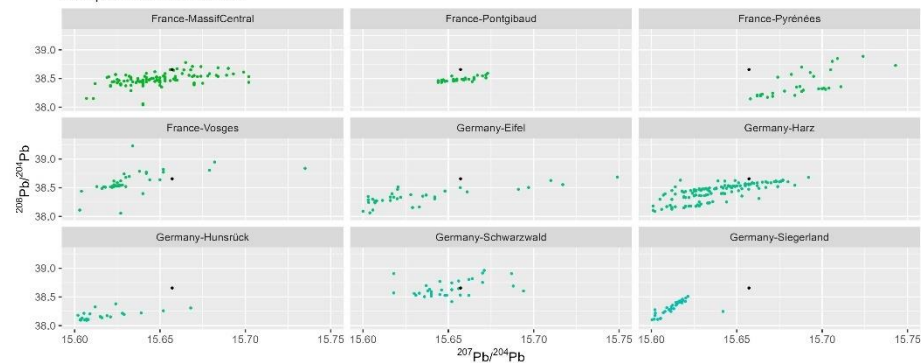



Sample 16-Denarius-60-1

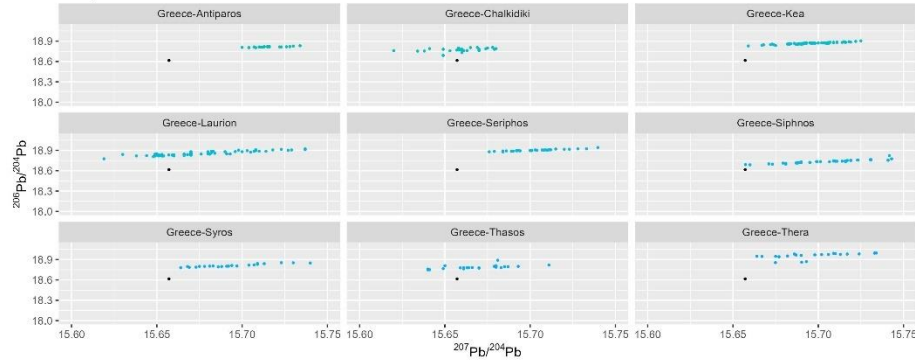

Sample 16-Denarius-60-1

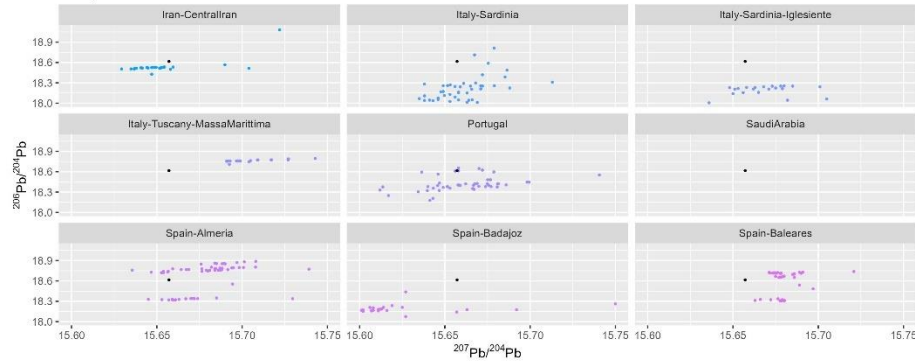

Sample 16-Denarius-60-1

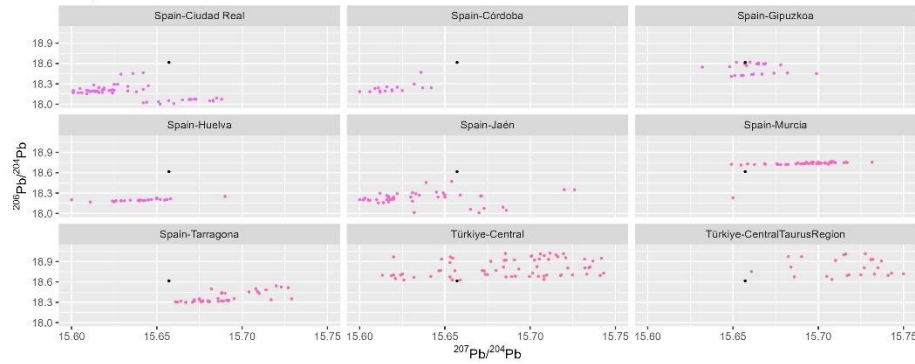

Sample 16-Denarius-60-1

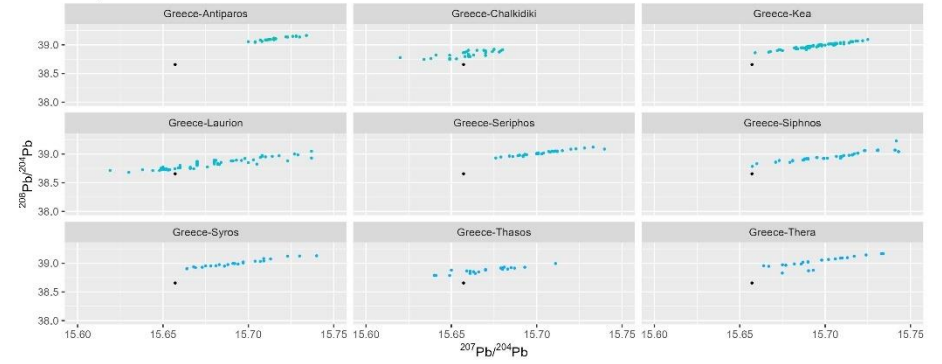

Sample 16-Denarius-60-1

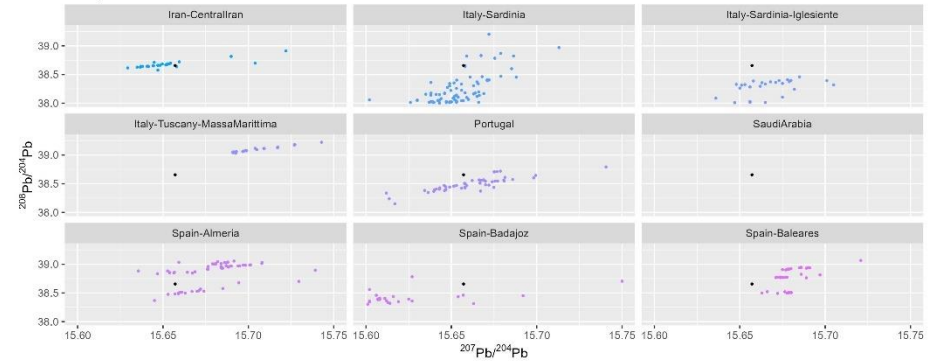

Sample 16-Denarius-60-1

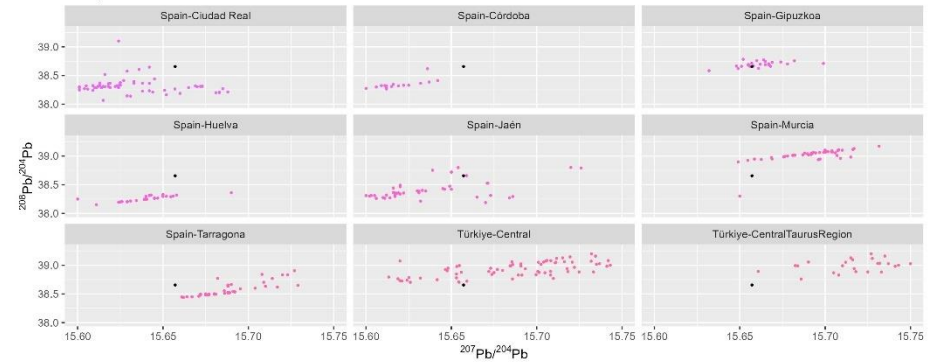

Sample 16-Denarius-60-1

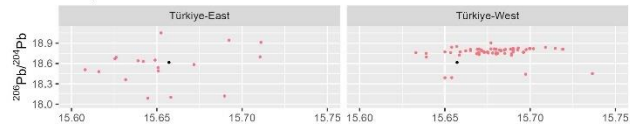

$^{207}\text{Pb}/^{204}\text{Pb}$

Sample 17-Quadrigratus-28-3

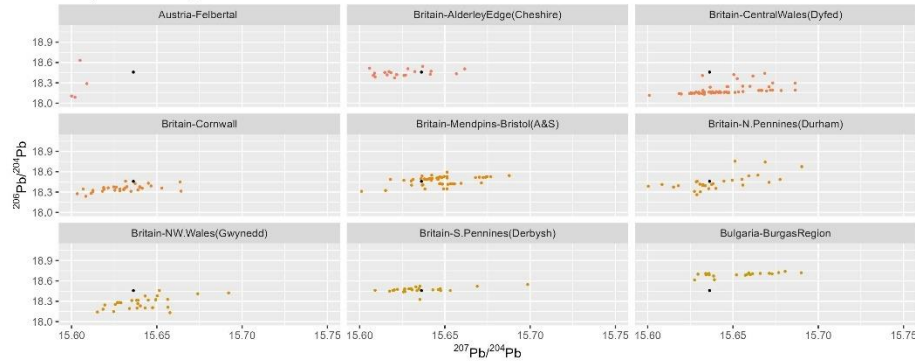

$^{207}\text{Pb}/^{204}\text{Pb}$

Sample 17-Quadrigratus-28-3

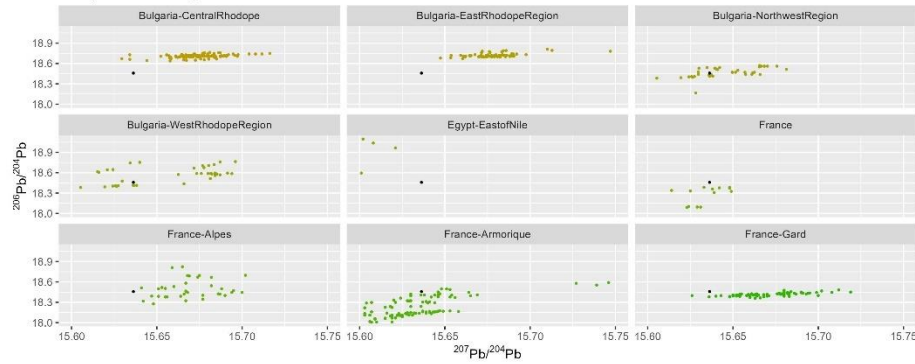

$^{207}\text{Pb}/^{204}\text{Pb}$

Sample 16-Denarius-60-1

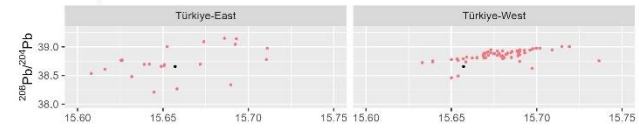

$^{207}\text{Pb}/^{204}\text{Pb}$

Sample 17-Quadrigratus-28-3

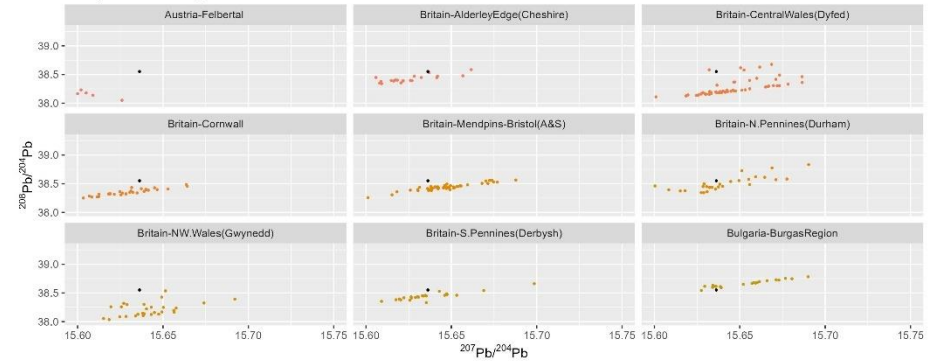

$^{207}\text{Pb}/^{204}\text{Pb}$

Sample 17-Quadrigratus-28-3

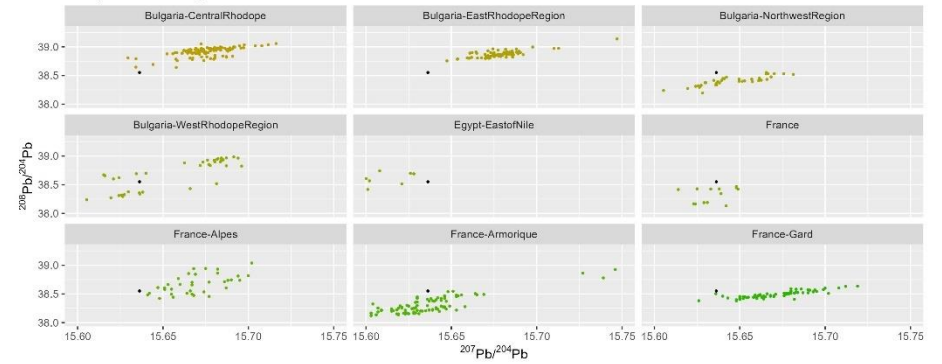

$^{207}\text{Pb}/^{204}\text{Pb}$

Sample 17-Quadrigatus-28-3

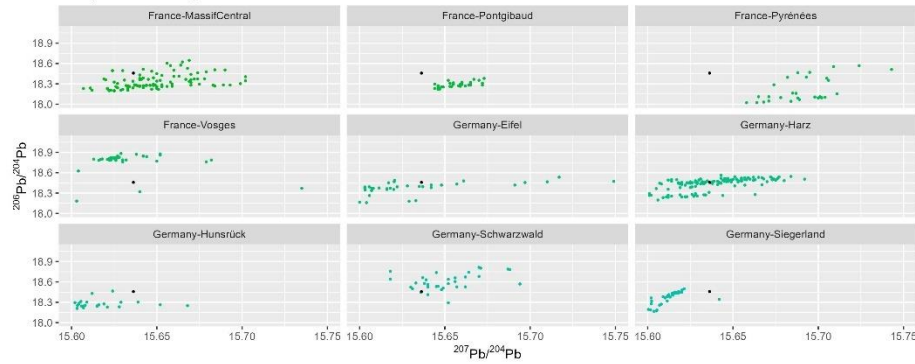

Sample 17-Quadrigatus-28-3

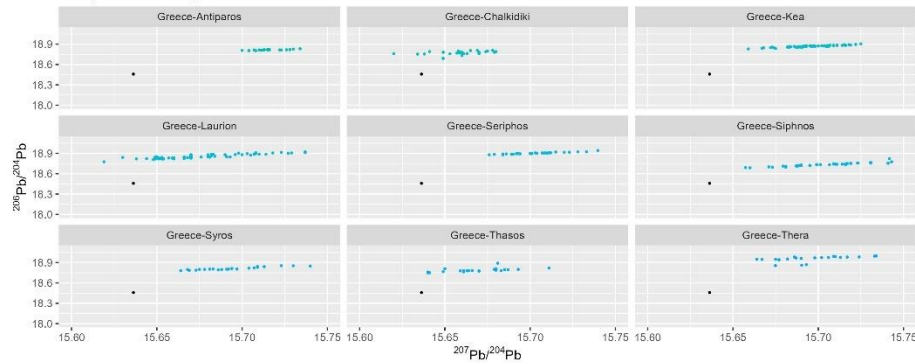

Sample 17-Quadrigatus-28-3

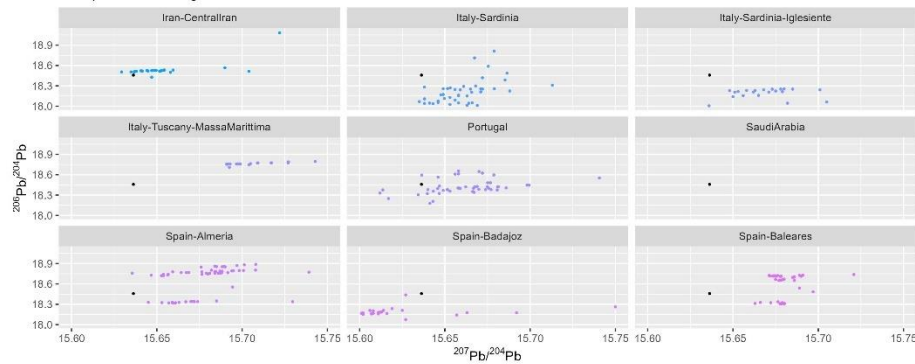

Sample 17-Quadrigatus-28-3

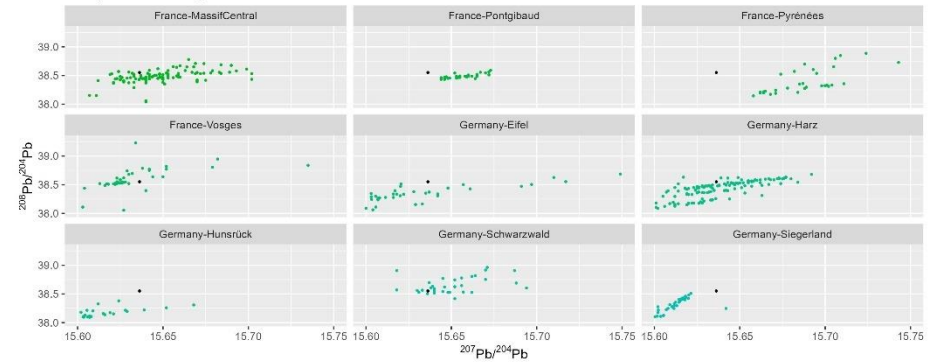

Sample 17-Quadrigatus-28-3

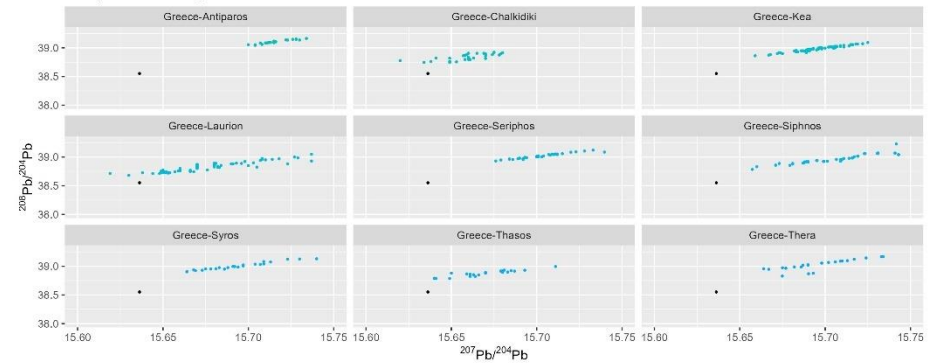

Sample 17-Quadrigatus-28-3

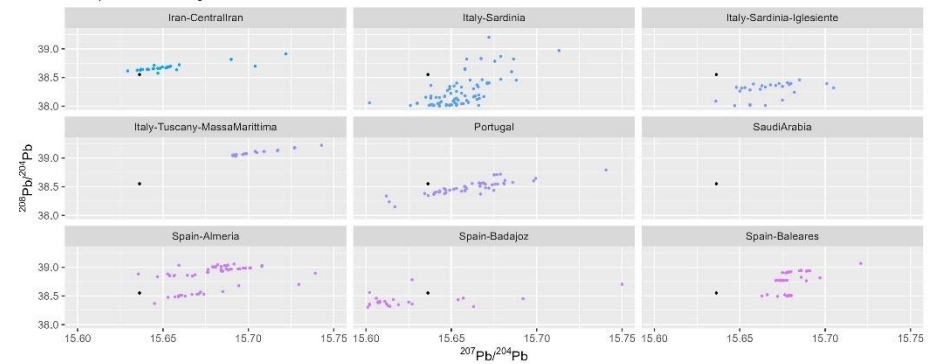

Sample 17-Quadrigatus-28-3

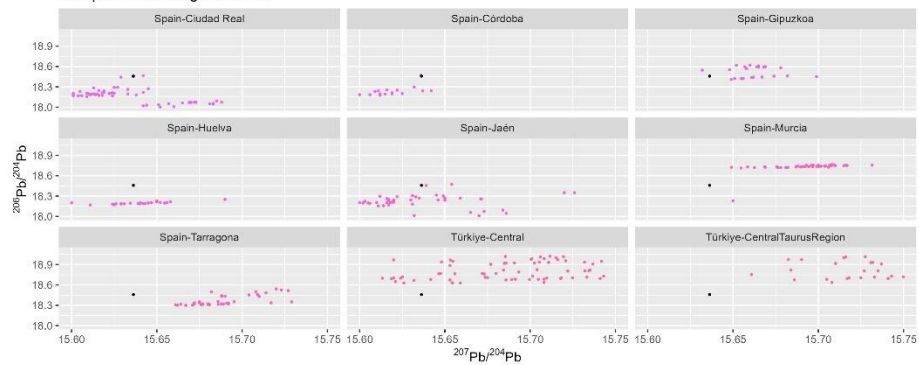

Sample 17-Quadrigatus-28-3

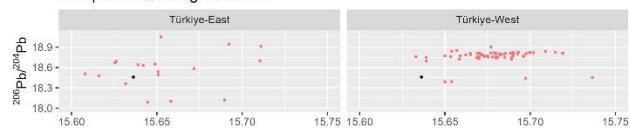

Sample 17-Quadrigatus-28-3

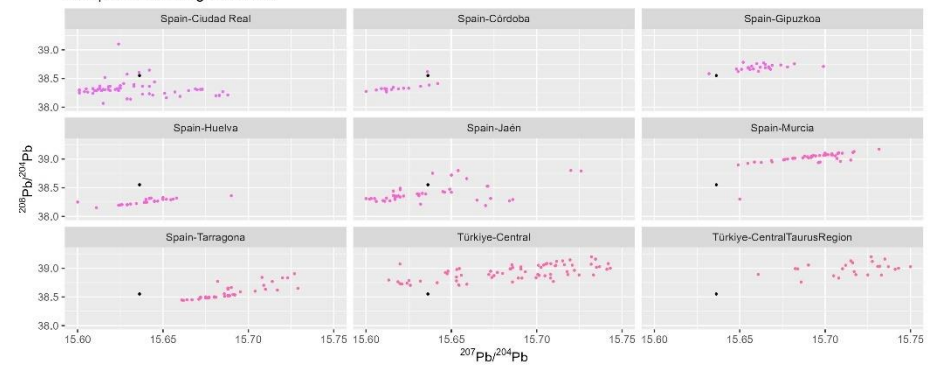

Sample 17-Quadrigatus-28-3

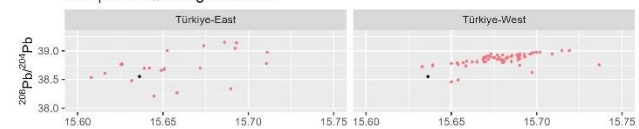

$^{207}\text{Pb}/^{204}\text{Pb}$

Sample 18-Denarius-58-2

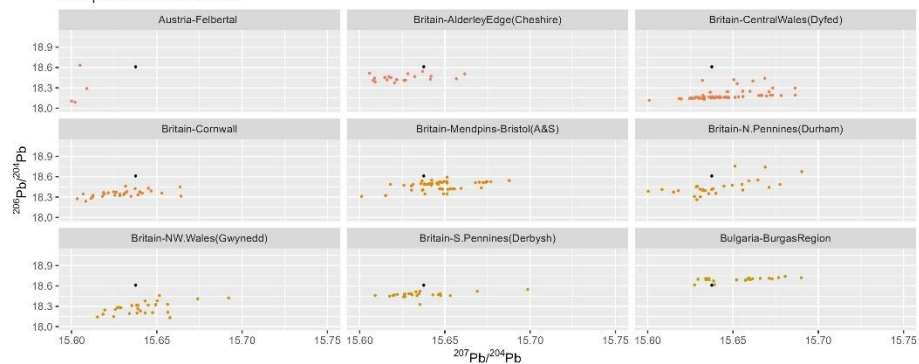

$^{207}\text{Pb}/^{204}\text{Pb}$

Sample 18-Denarius-58-2

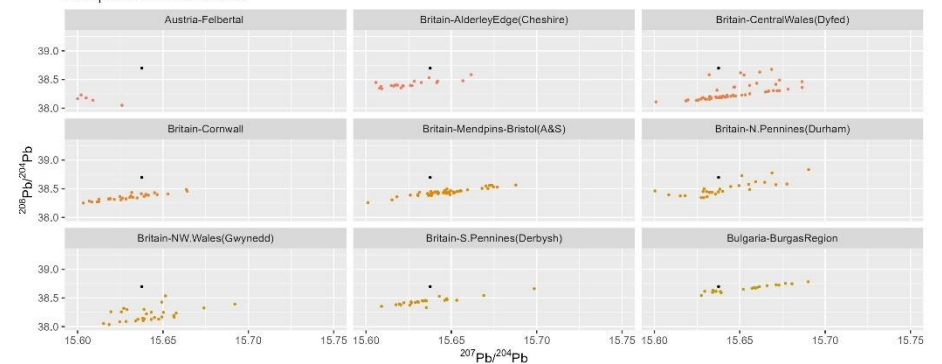



Sample 18-Denarius-58-2

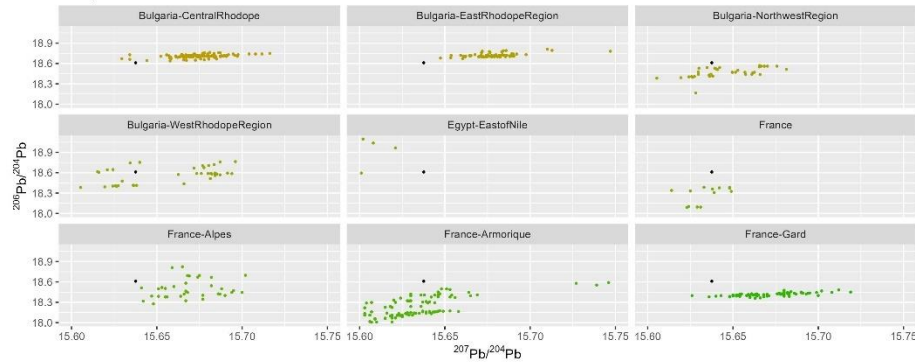

Sample 18-Denarius-58-2

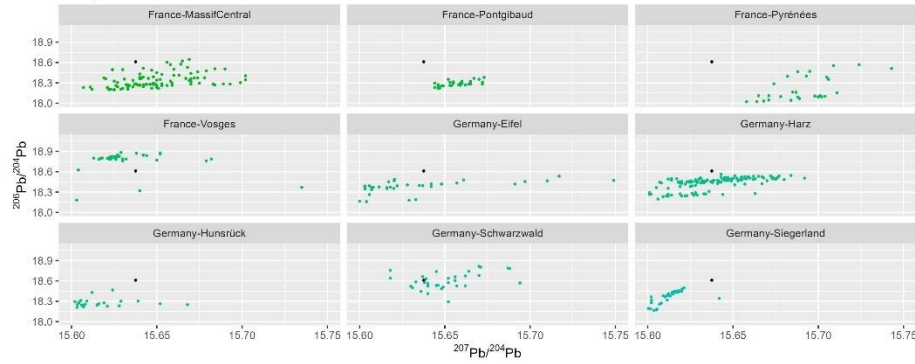

Sample 18-Denarius-58-2

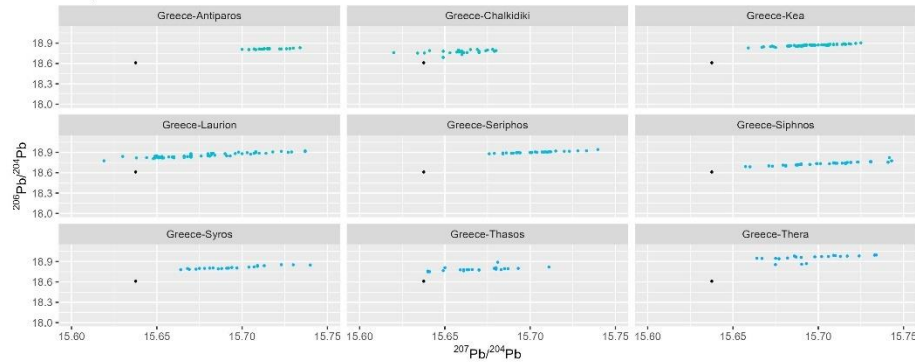

Sample 18-Denarius-58-2

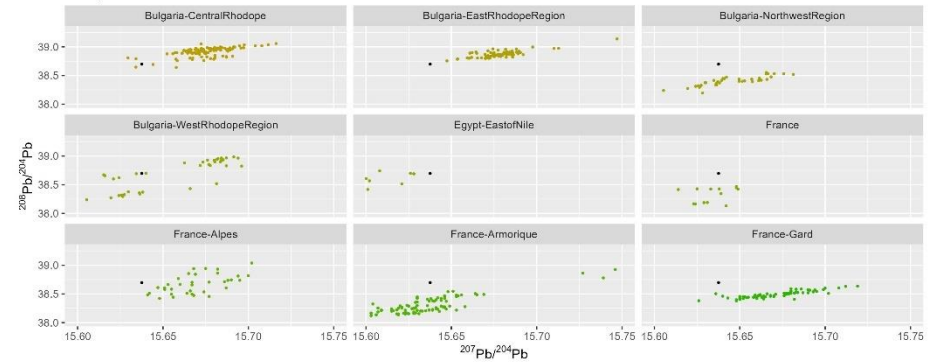

Sample 18-Denarius-58-2

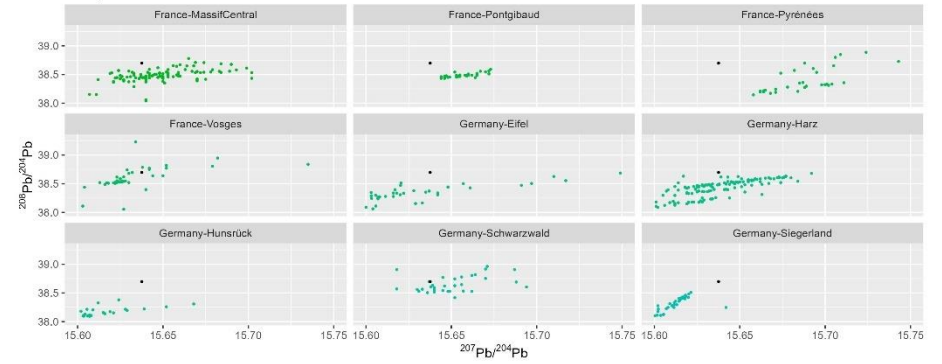

Sample 18-Denarius-58-2

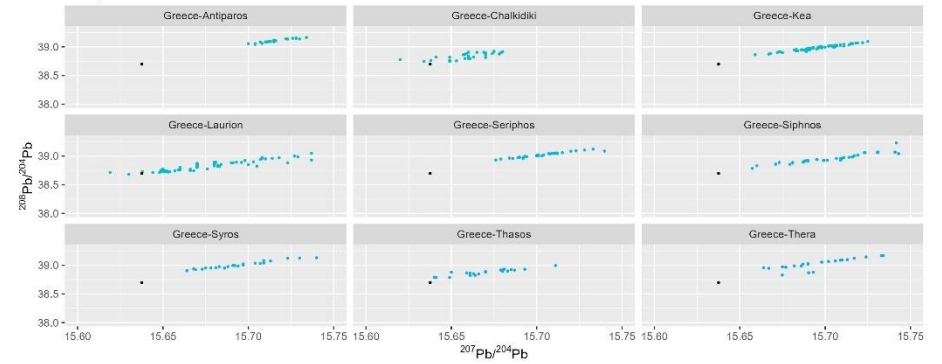

Sample 18-Denarius-58-2

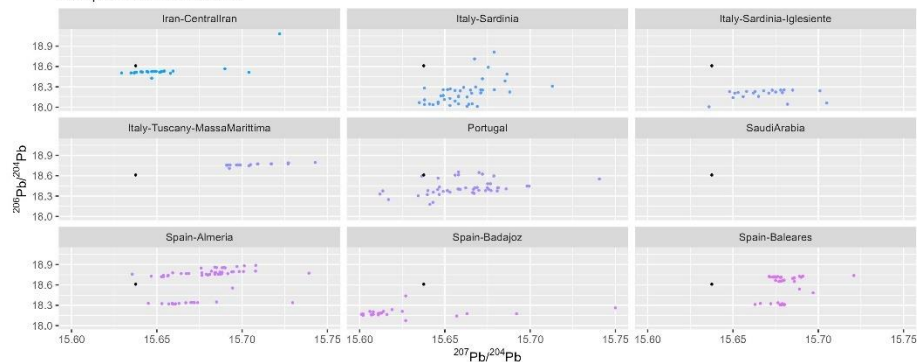

Sample 18-Denarius-58-2

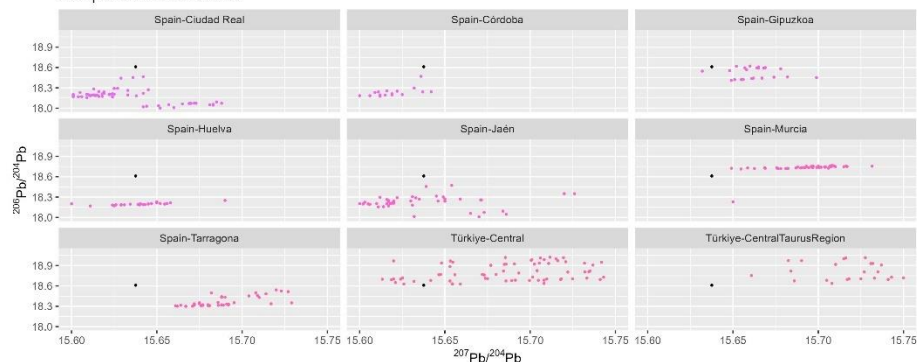

Sample 18-Denarius-58-2

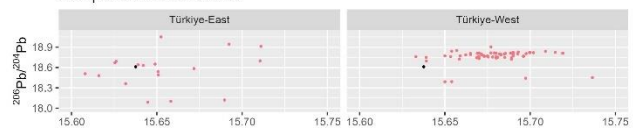

$^{207}\text{Pb}/^{204}\text{Pb}$

Sample 18-Denarius-58-2

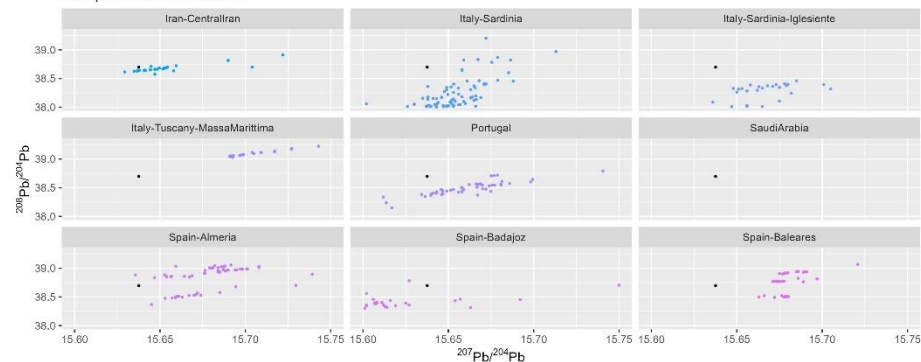

Sample 18-Denarius-58-2

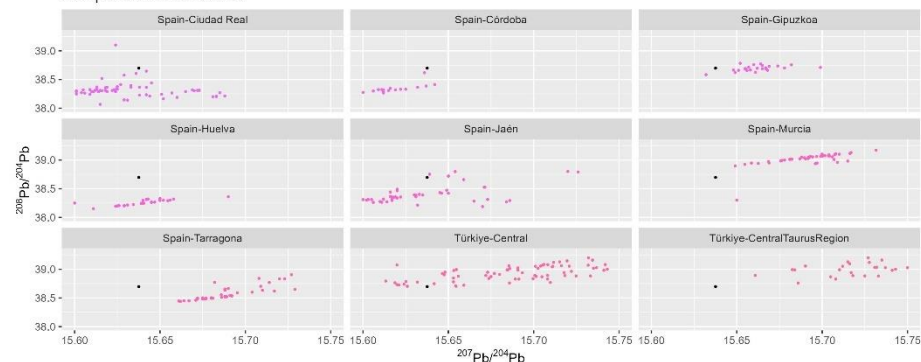

Sample 18-Denarius-58-2

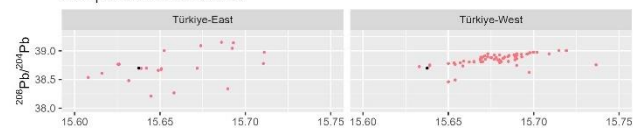

$^{207}\text{Pb}/^{204}\text{Pb}$

Sample 19-Denarius-112-2a

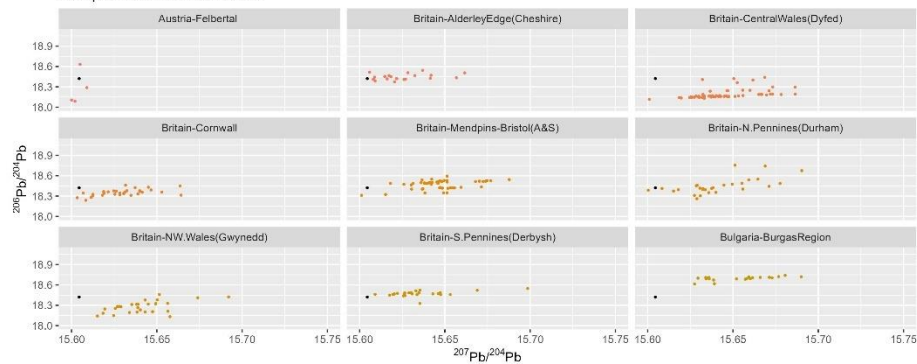

Sample 19-Denarius-112-2a

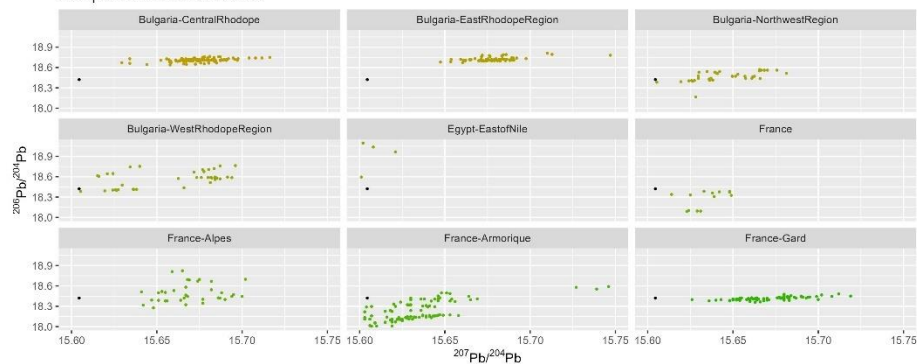

Sample 19-Denarius-112-2a

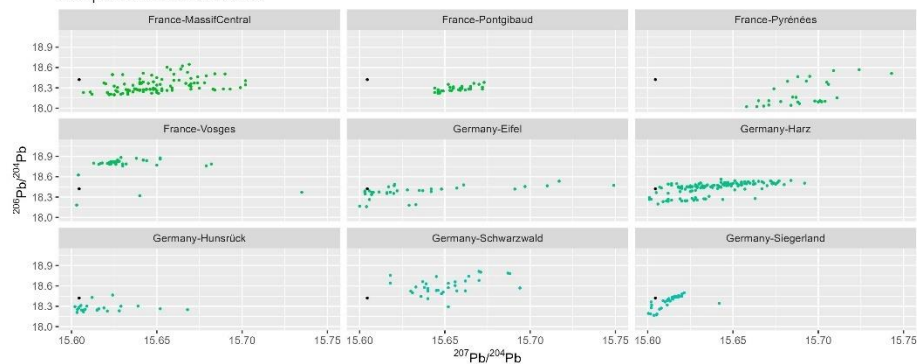

Sample 19-Denarius-112-2a

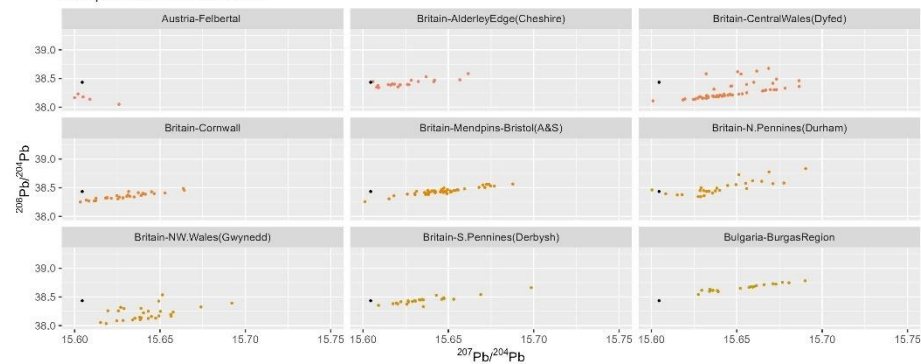

Sample 19-Denarius-112-2a

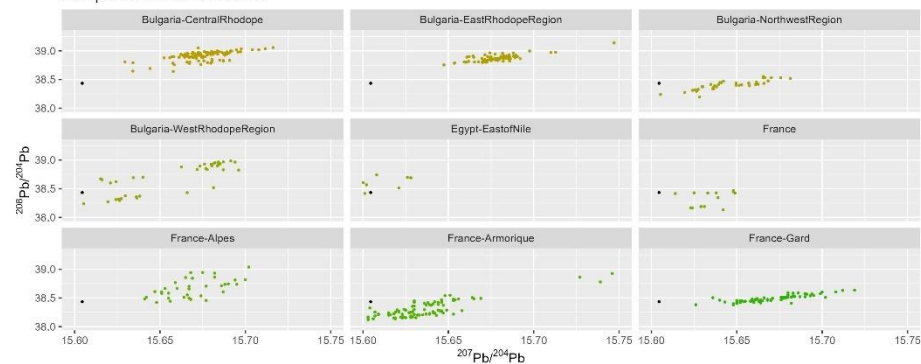

Sample 19-Denarius-112-2a

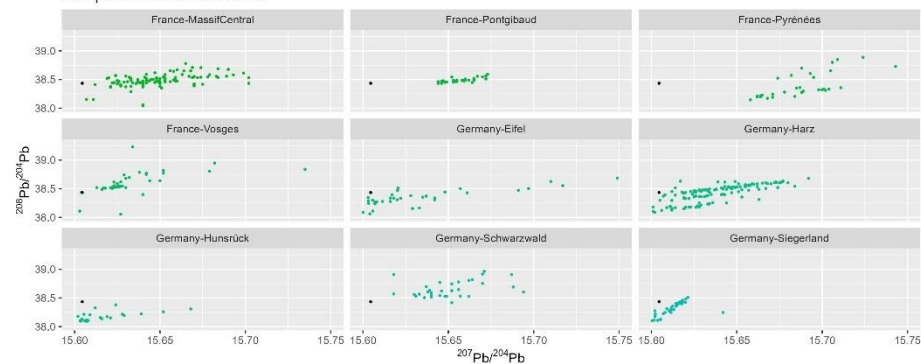

Sample 19-Denarius-112-2a

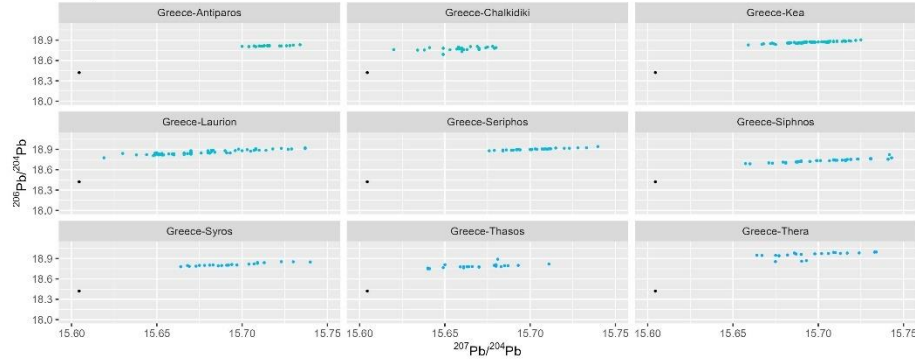

Sample 19-Denarius-112-2a

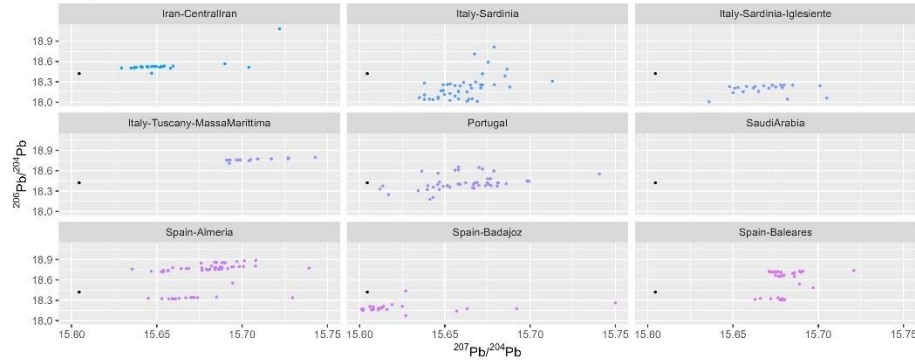

Sample 19-Denarius-112-2a

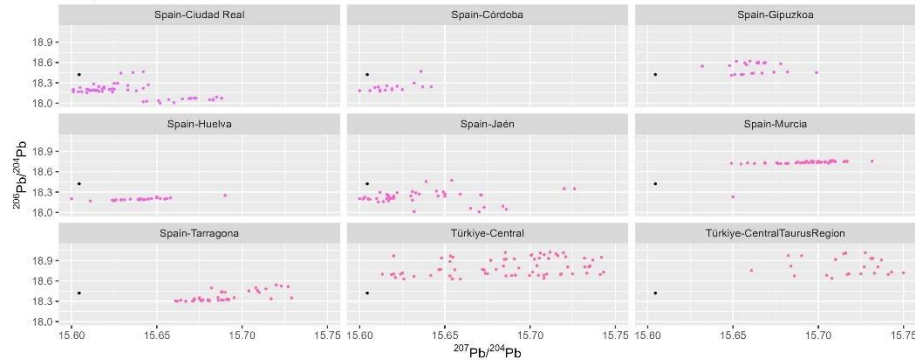

Sample 19-Denarius-112-2a

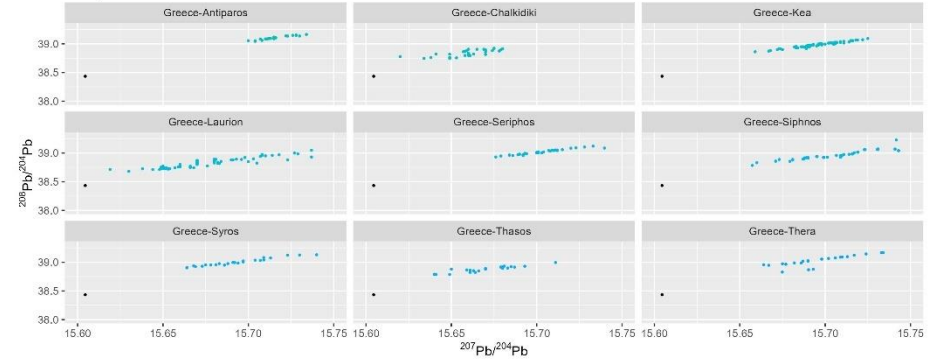

Sample 19-Denarius-112-2a

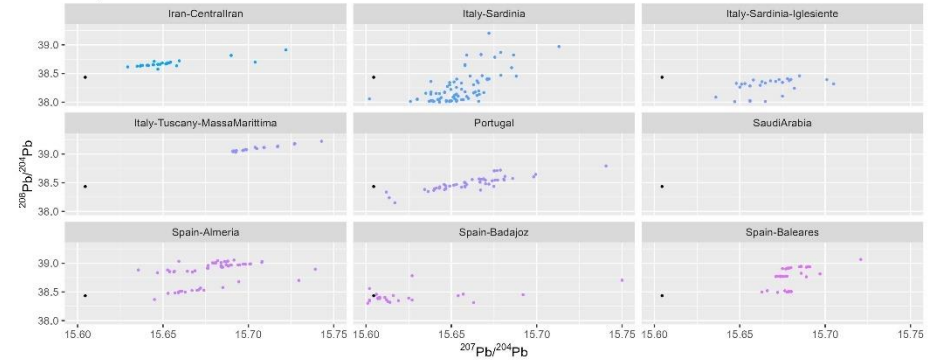

Sample 19-Denarius-112-2a

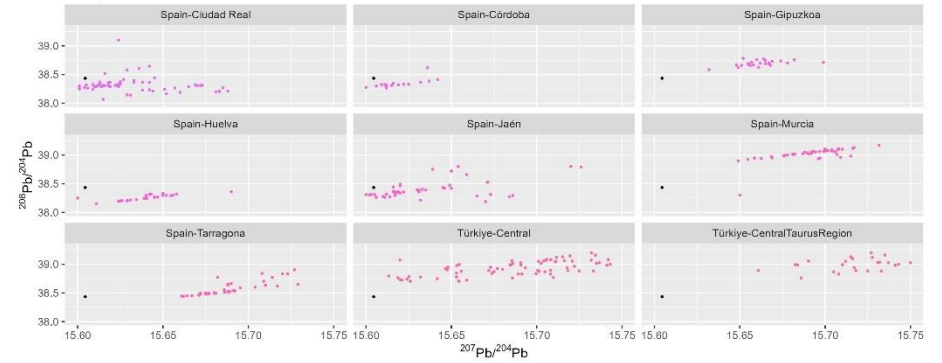



Sample 19-Denarius-112-2a

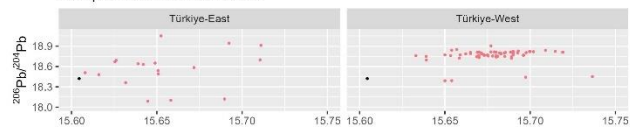

$^{207}\text{Pb}/^{204}\text{Pb}$

Sample 21-Janus-29-3

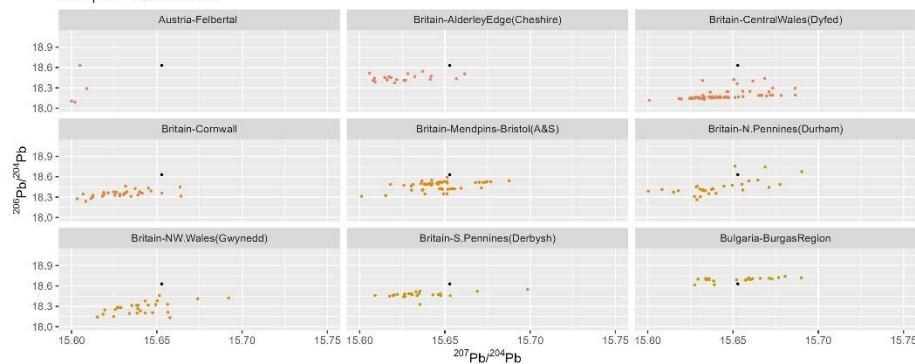

$^{207}\text{Pb}/^{204}\text{Pb}$

Sample 21-Janus-29-3

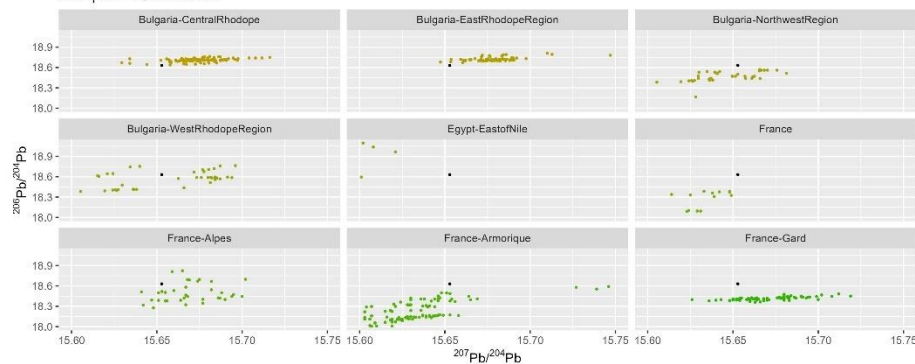

$^{207}\text{Pb}/^{204}\text{Pb}$

Sample 19-Denarius-112-2a

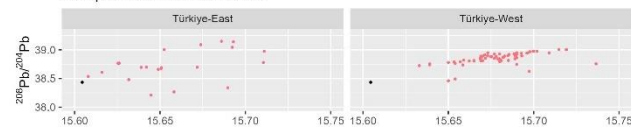

$^{207}\text{Pb}/^{204}\text{Pb}$

Sample 21-Janus-29-3

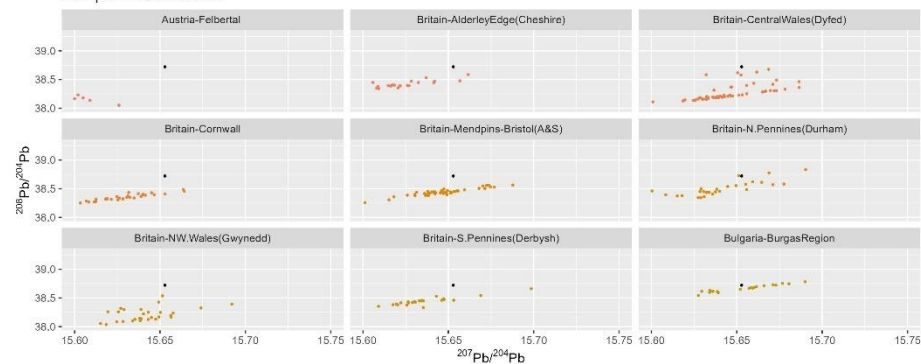

$^{207}\text{Pb}/^{204}\text{Pb}$

Sample 21-Janus-29-3

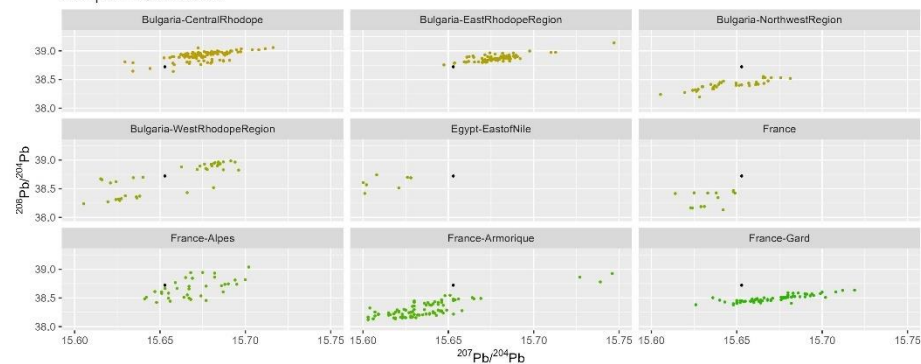

$^{207}\text{Pb}/^{204}\text{Pb}$

Sample 21-Janus-29-3

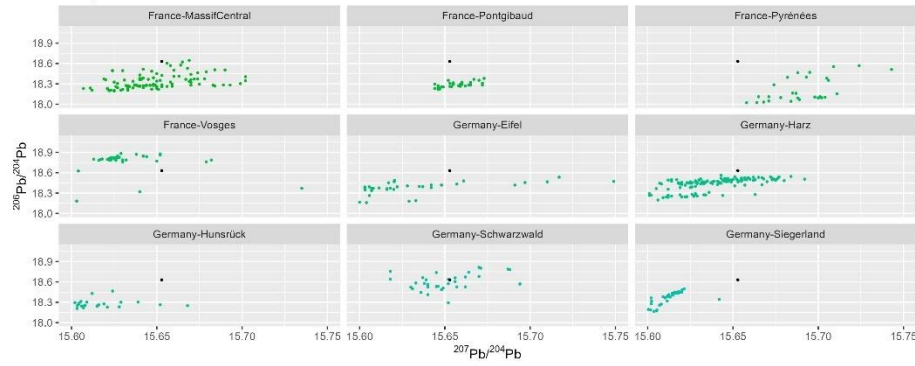

Sample 21-Janus-29-3

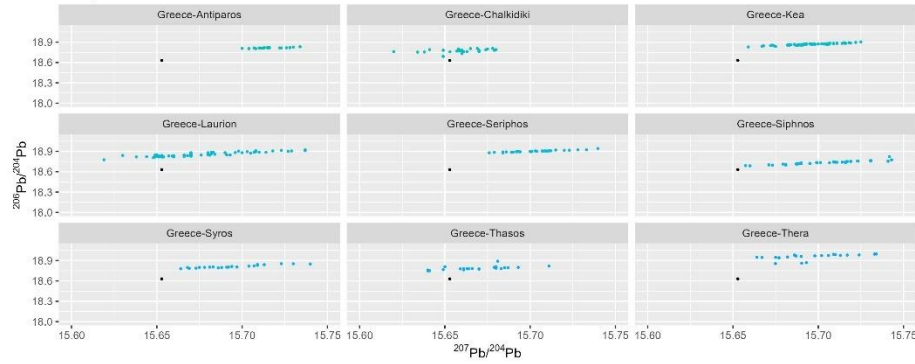

Sample 21-Janus-29-3

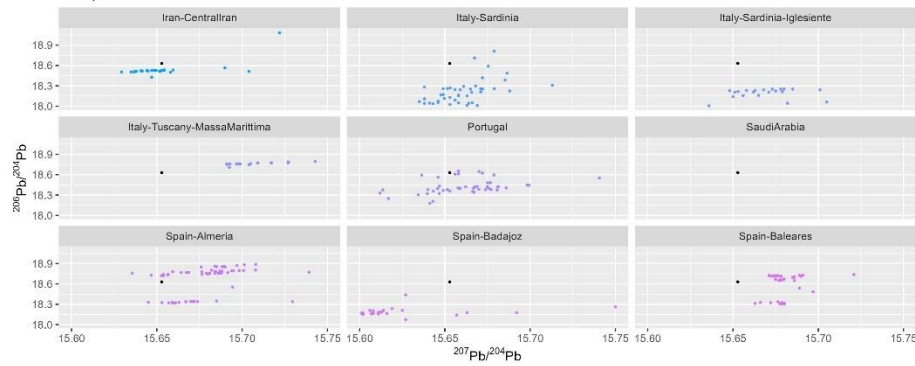

Sample 21-Janus-29-3

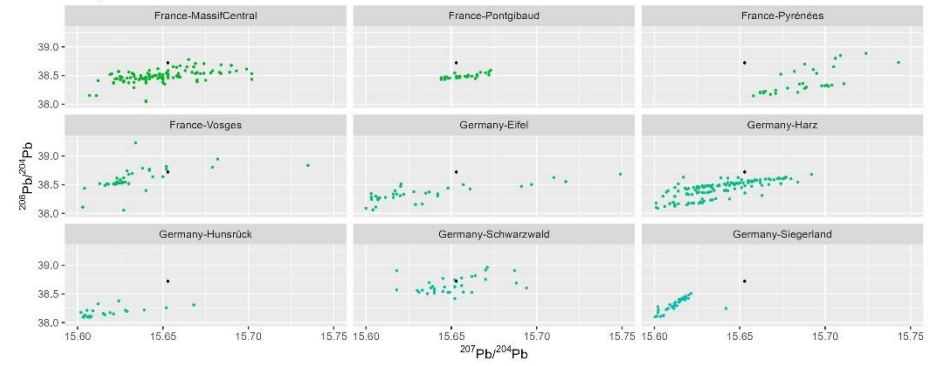

Sample 21-Janus-29-3

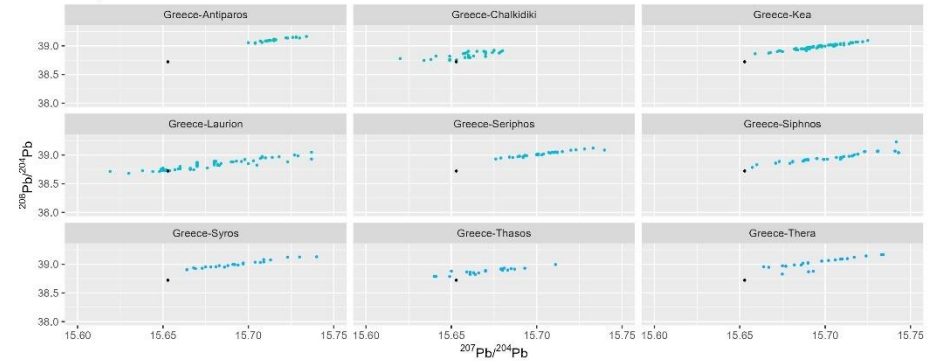

Sample 21-Janus-29-3

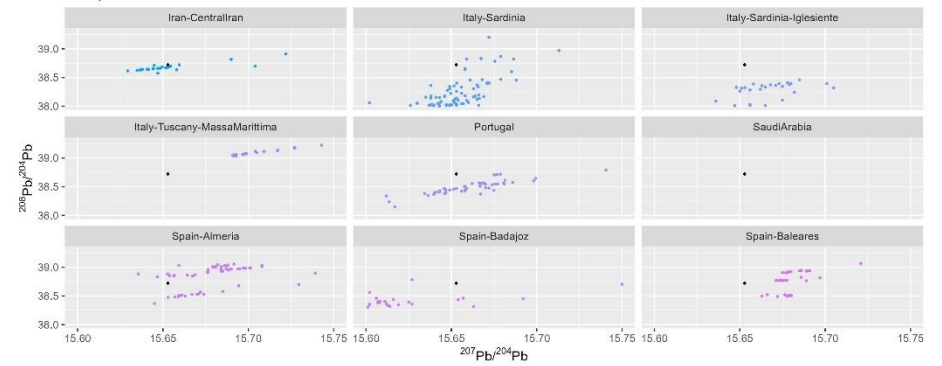

Sample 21-Janus-29-3

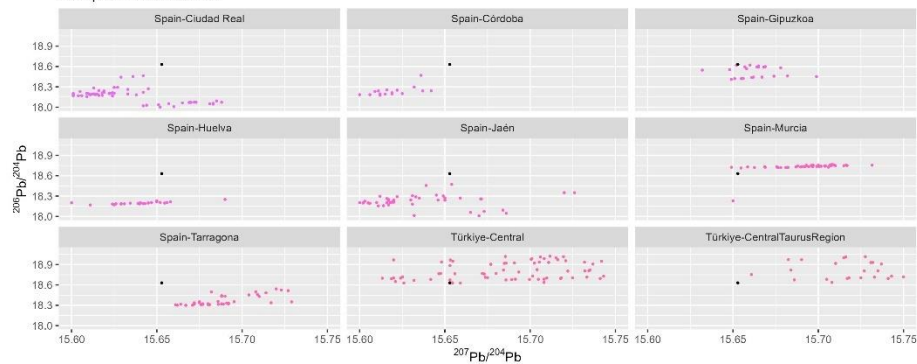

Sample 21-Janus-29-3

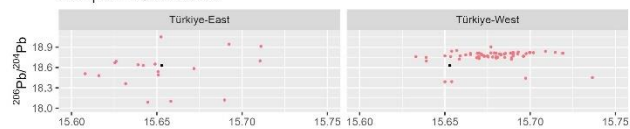

Sample 21-Janus-29-3

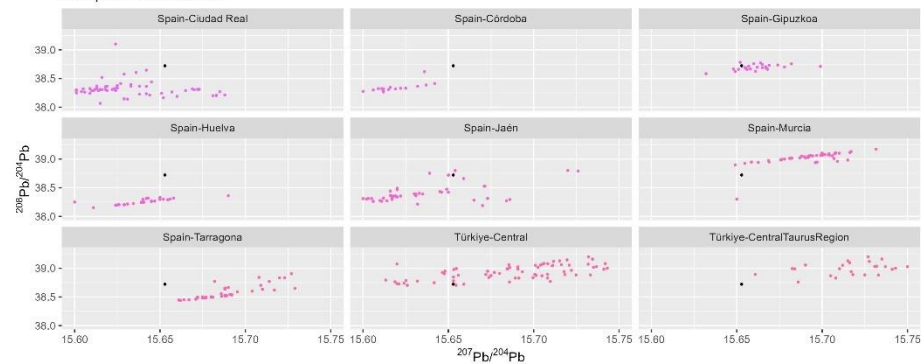

Sample 21-Janus-29-3

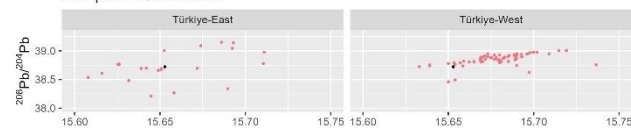

$^{207}\text{Pb}/^{204}\text{Pb}$

Sample 22-Denarius-44-5

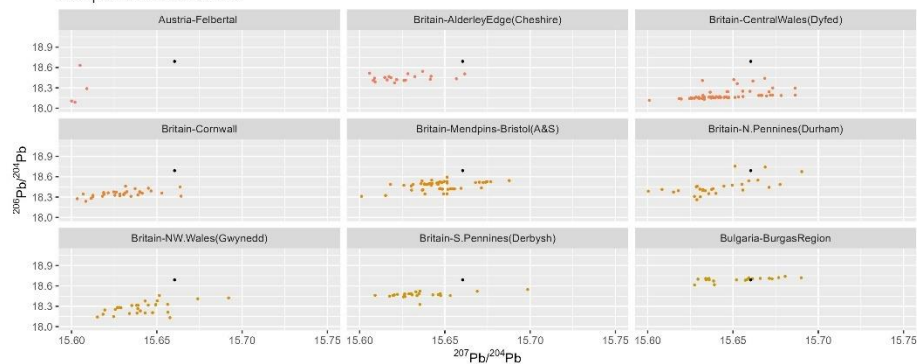

$^{207}\text{Pb}/^{204}\text{Pb}$

Sample 22-Denarius-44-5

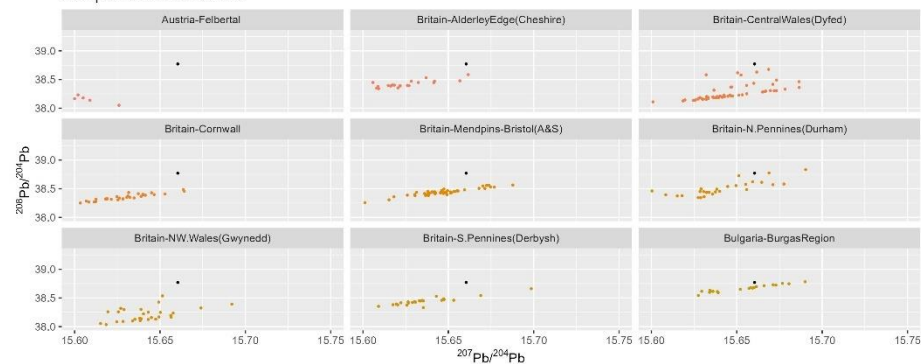

Sample 22-Denarius-44-5

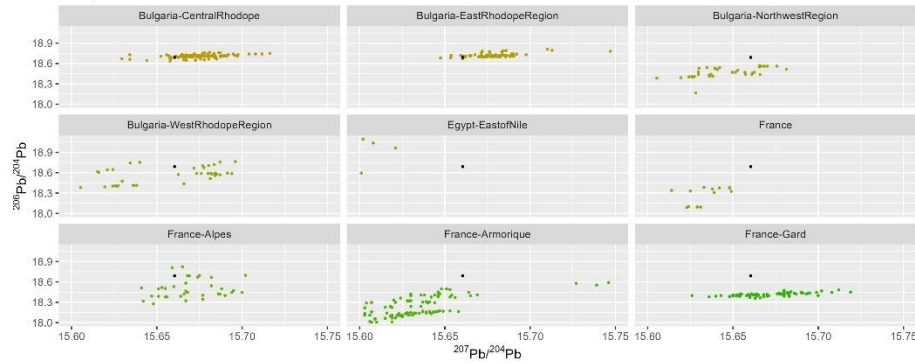

Sample 22-Denarius-44-5

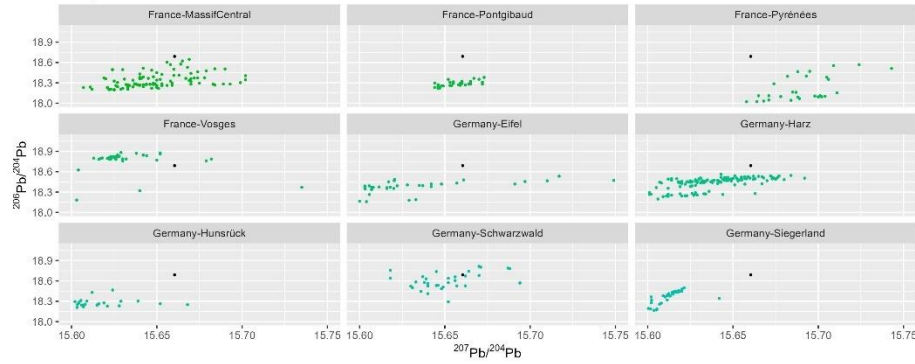

Sample 22-Denarius-44-5

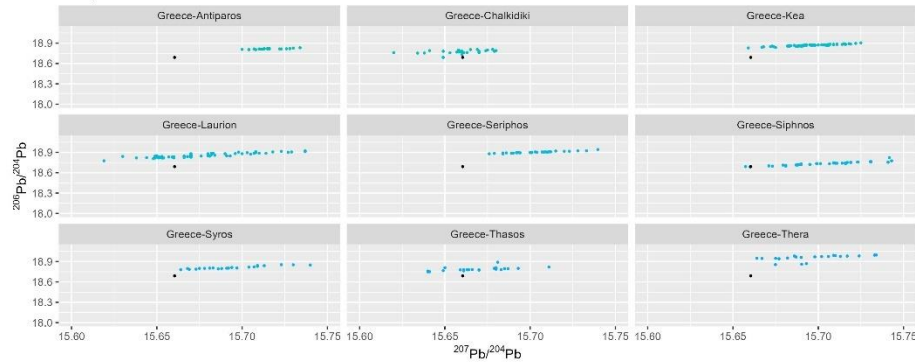

Sample 22-Denarius-44-5

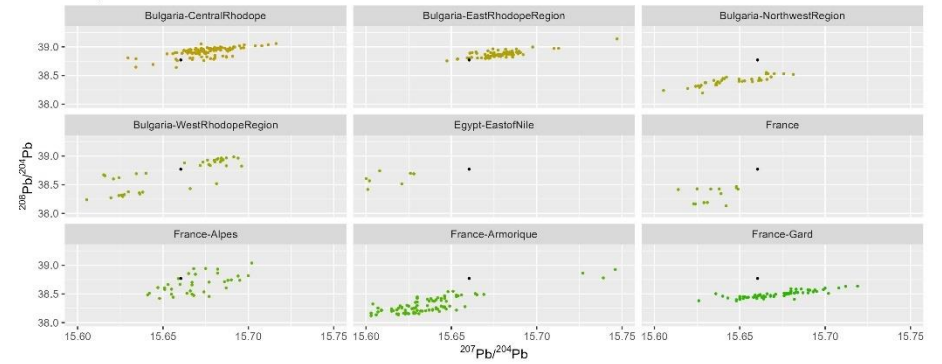

Sample 22-Denarius-44-5

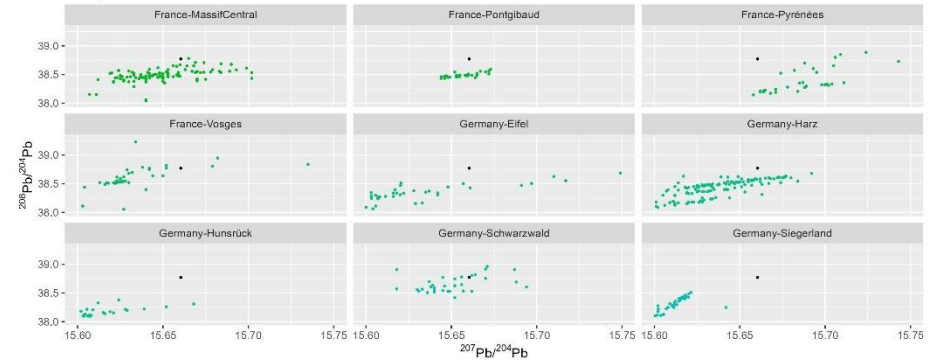

Sample 22-Denarius-44-5

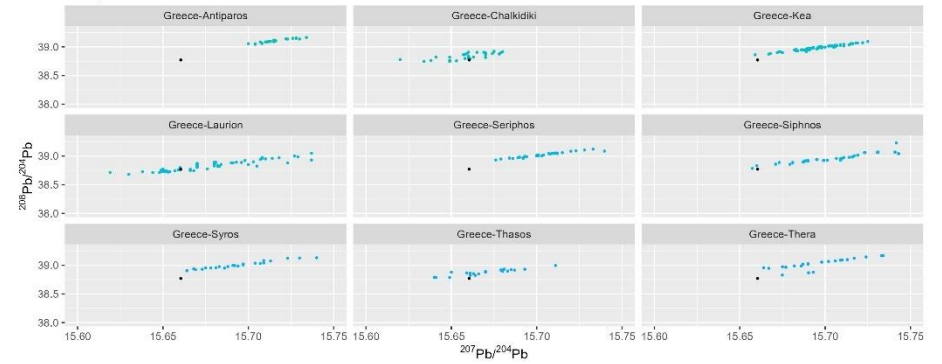



Sample 22-Denarius-44-5

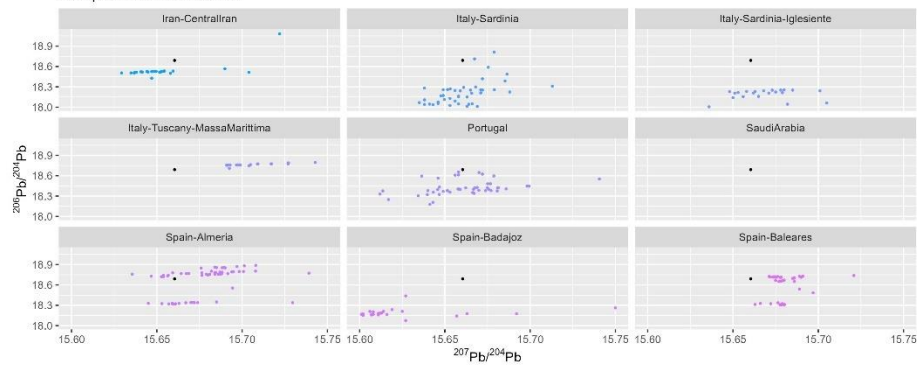

Sample 22-Denarius-44-5

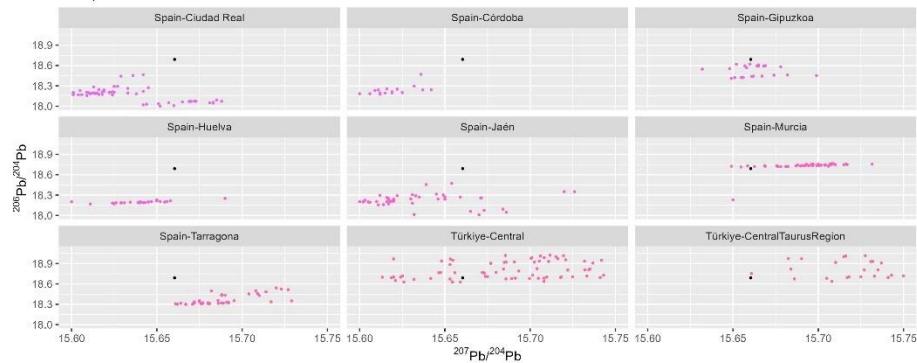

Sample 22-Denarius-44-5

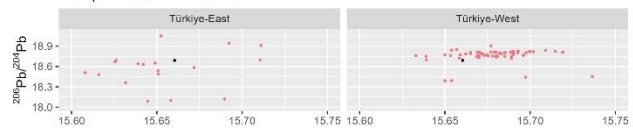

207Pb/204Pb

Sample 22-Denarius-44-5

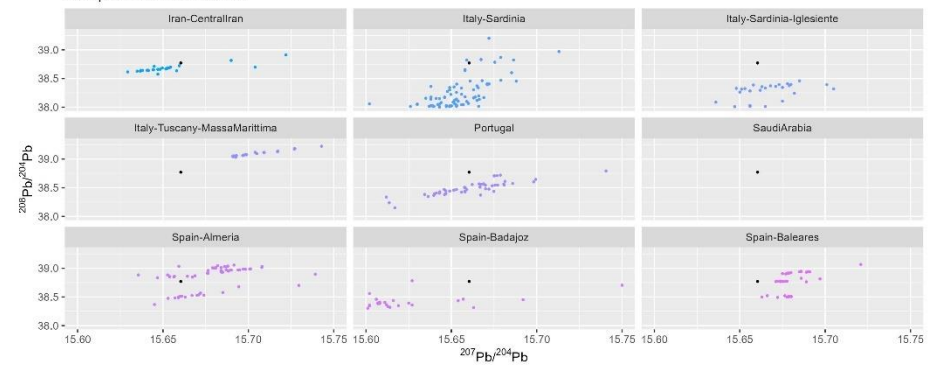

Sample 22-Denarius-44-5

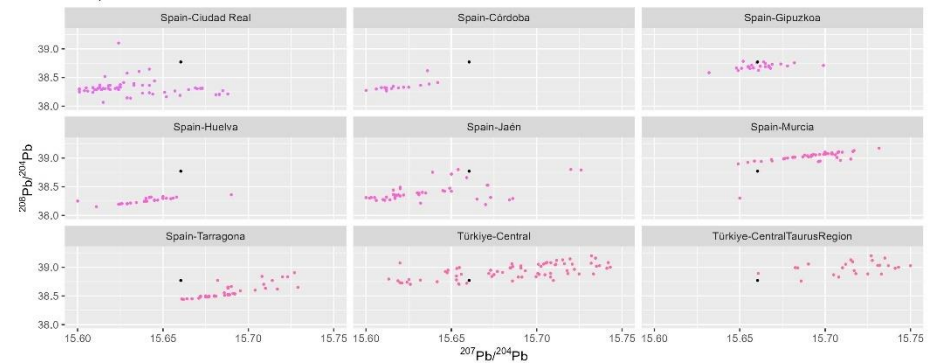

Sample 22-Denarius-44-5

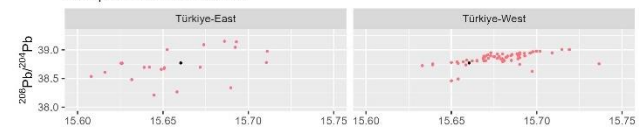

207Pb/204Pb

Sample 23-Denarius-30-1

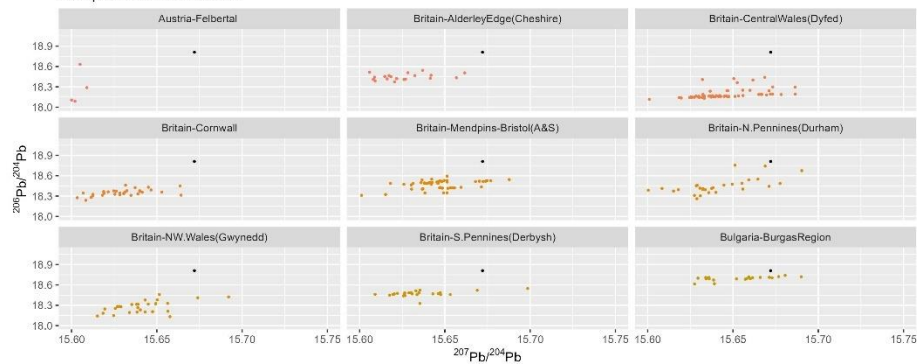

Sample 23-Denarius-30-1

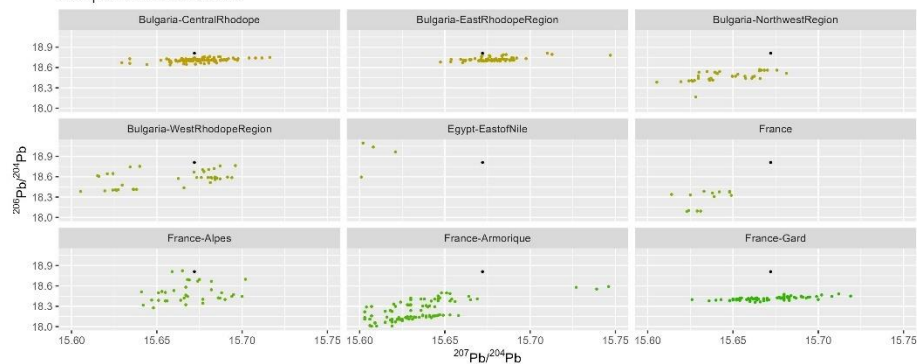

Sample 23-Denarius-30-1

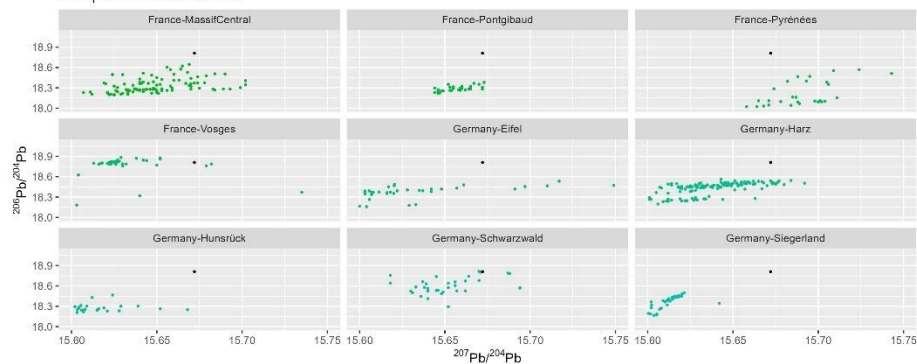

Sample 23-Denarius-30-1

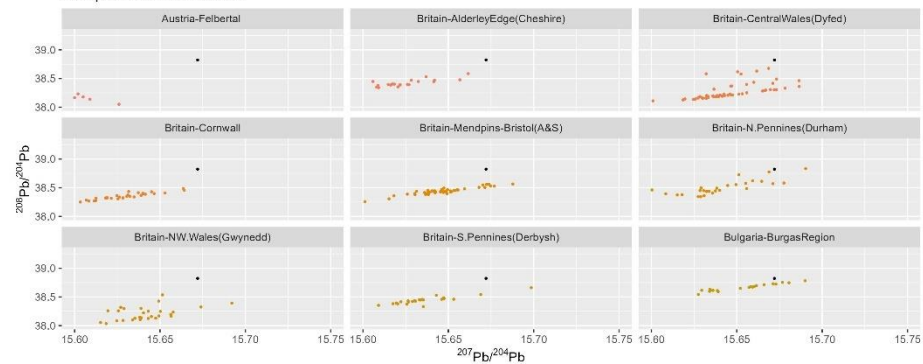

Sample 23-Denarius-30-1

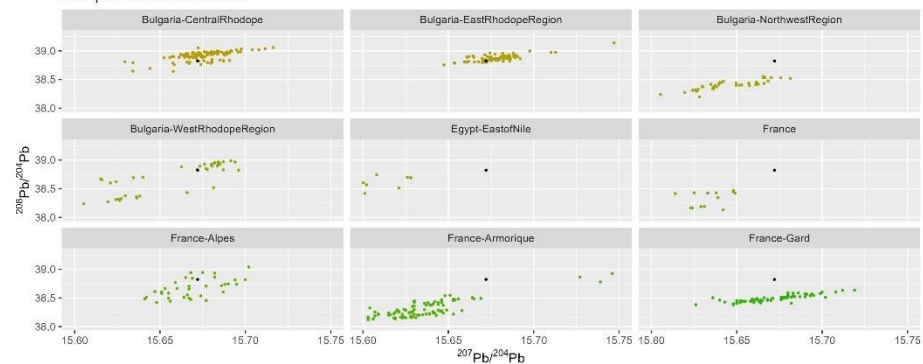

Sample 23-Denarius-30-1

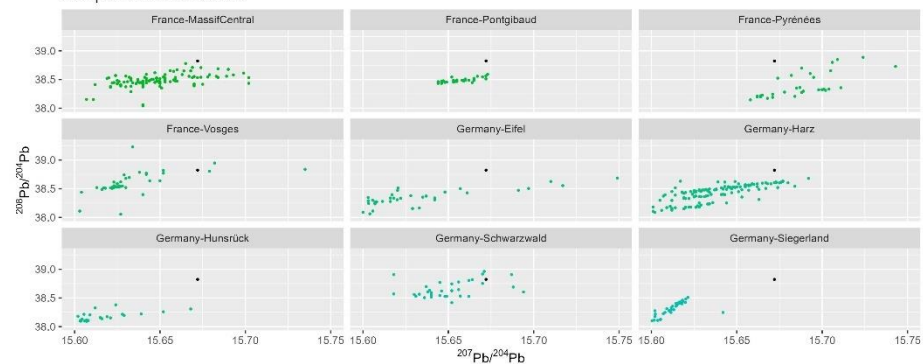

Sample 23-Denarius-30-1

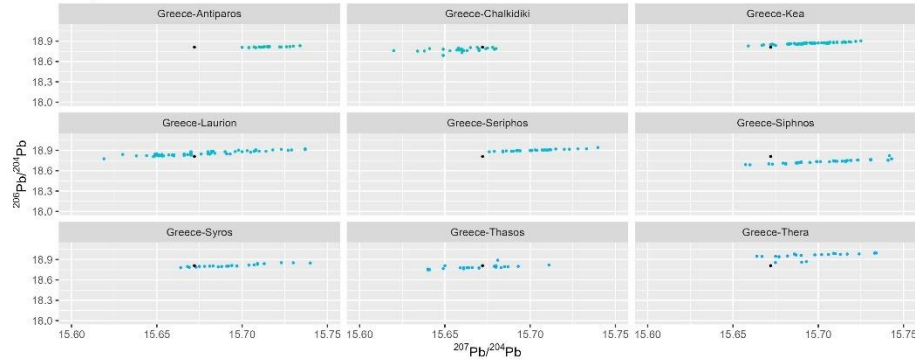

Sample 23-Denarius-30-1

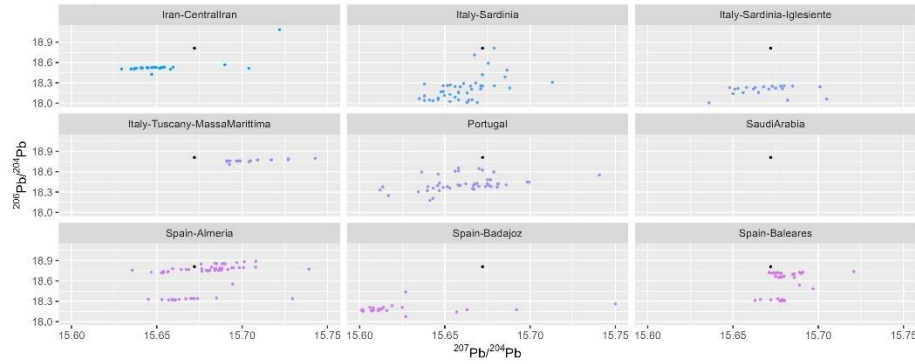

Sample 23-Denarius-30-1

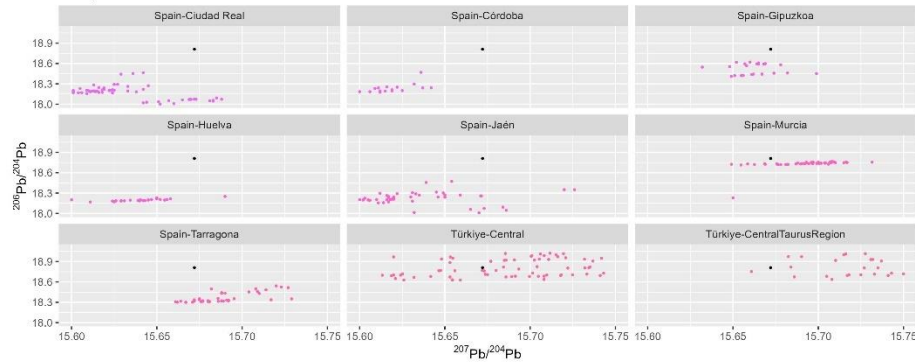

Sample 23-Denarius-30-1

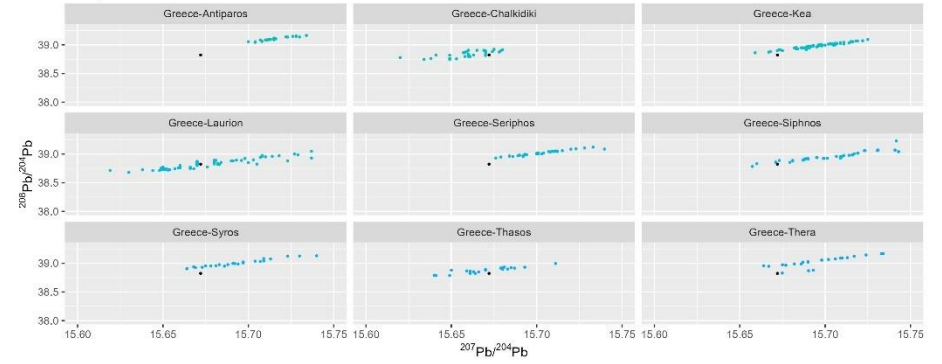

Sample 23-Denarius-30-1

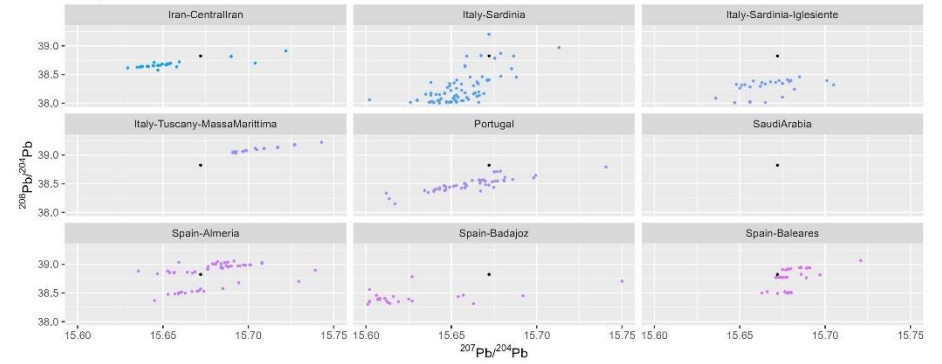

Sample 23-Denarius-30-1

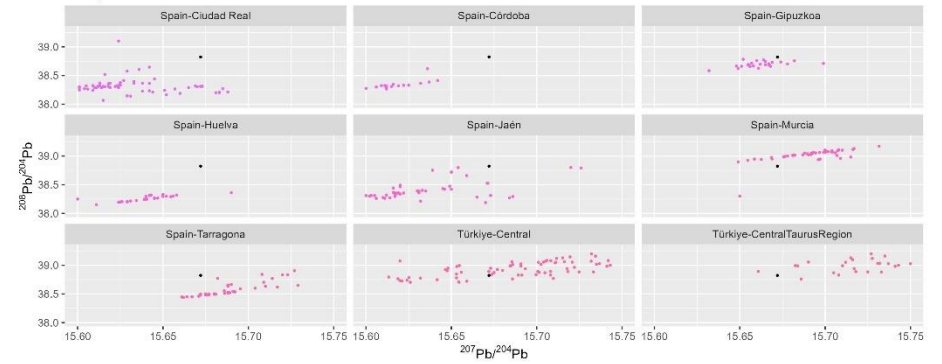

Sample 23-Denarius-30-1

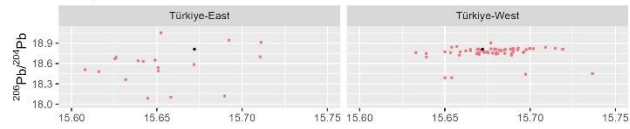

Sample 23-Denarius-30-1

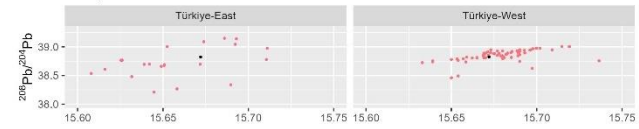

Sample 24-Quinarius-44-6

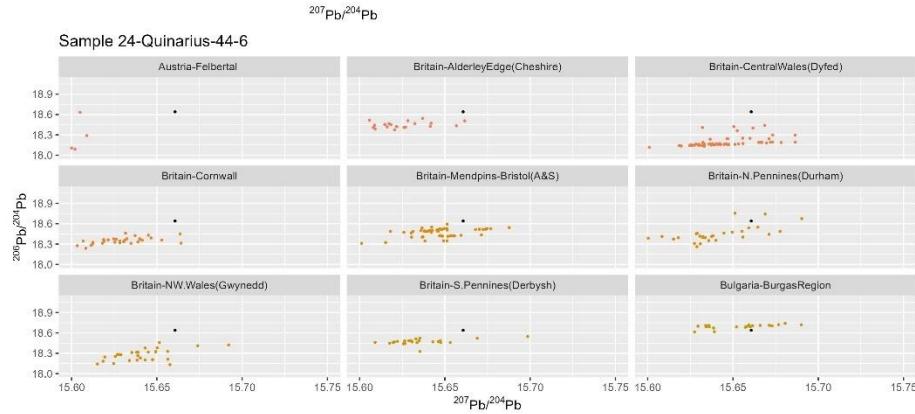

Sample 24-Quinarius-44-6

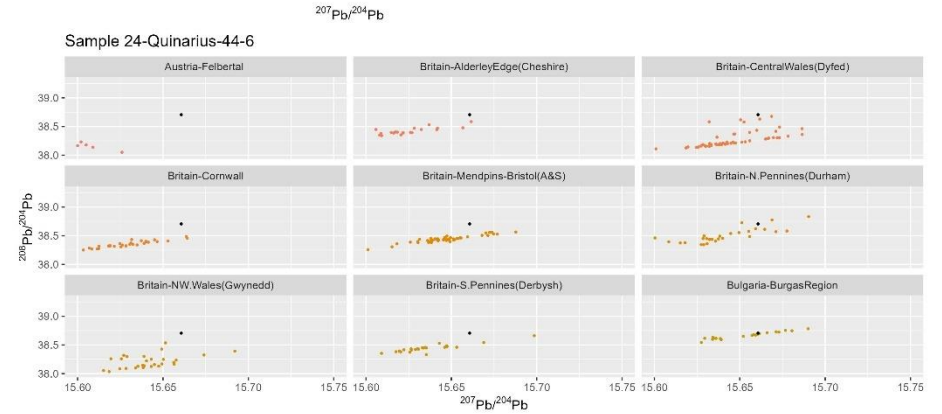

Sample 24-Quinarius-44-6

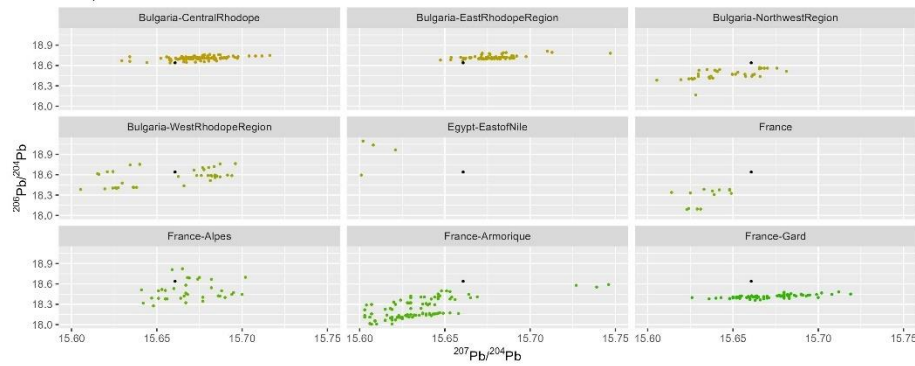

Sample 24-Quinarius-44-6

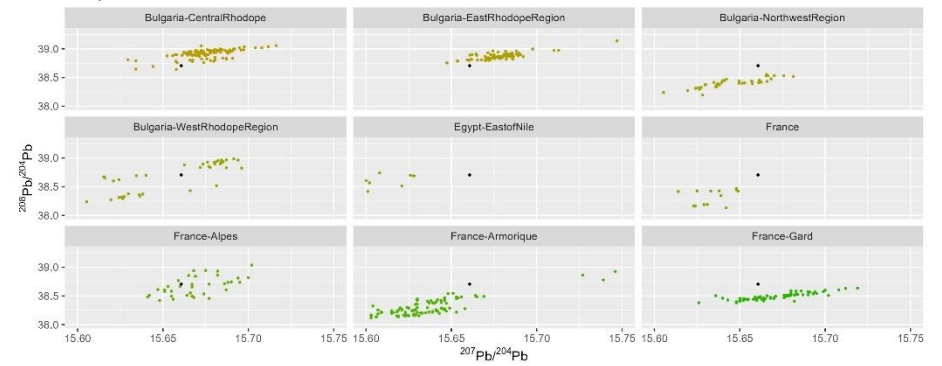



Sample 24-Quinarius-44-6

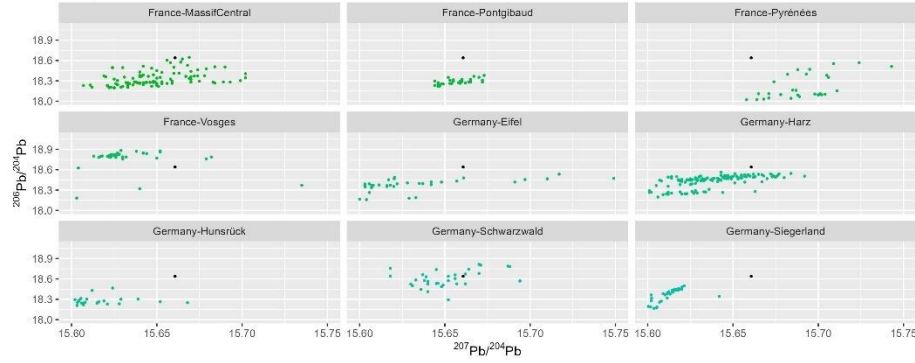

Sample 24-Quinarius-44-6

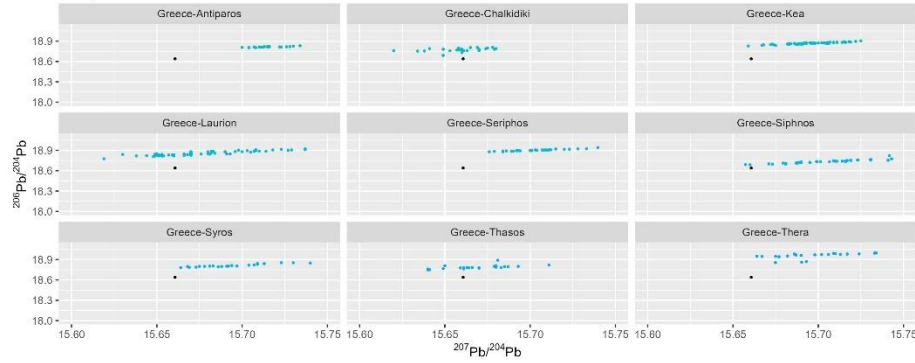

Sample 24-Quinarius-44-6

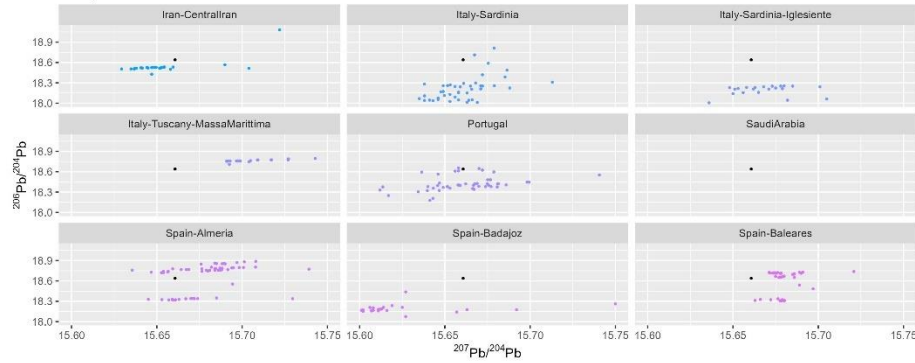

Sample 24-Quinarius-44-6

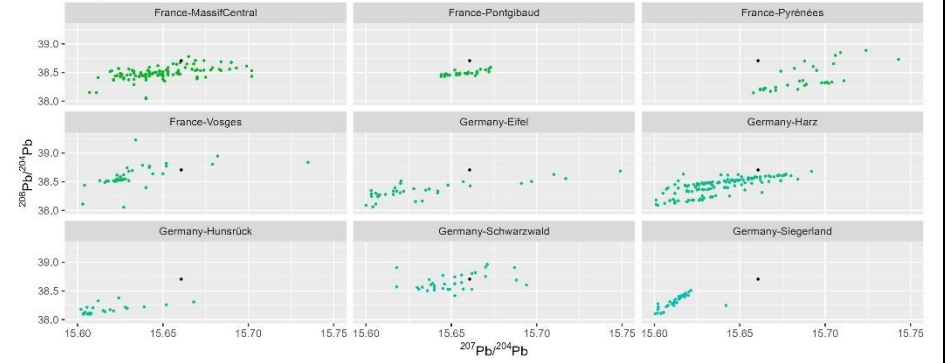

Sample 24-Quinarius-44-6

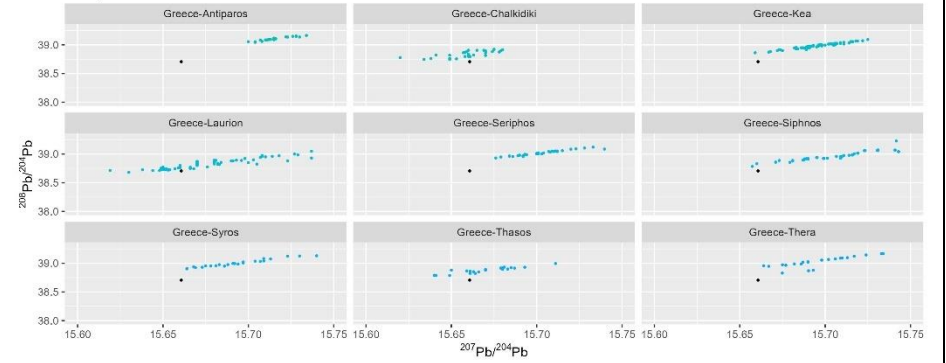

Sample 24-Quinarius-44-6

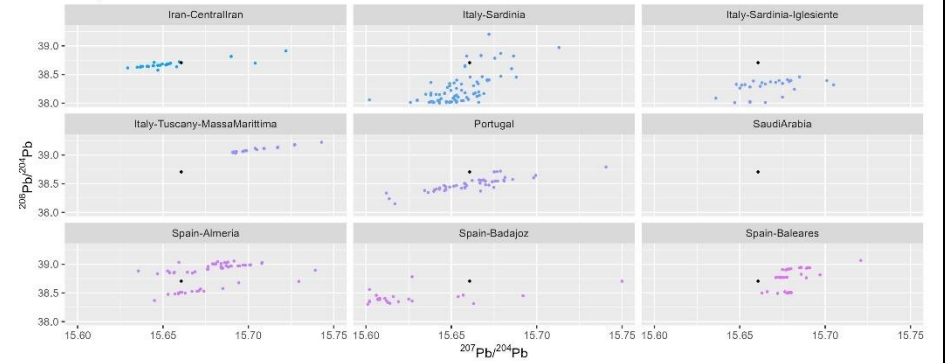

Sample 24-Quinarius-44-6

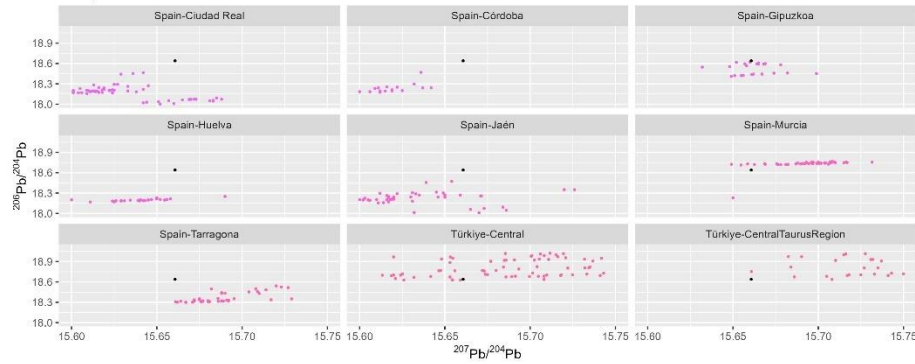

Sample 24-Quinarius-44-6

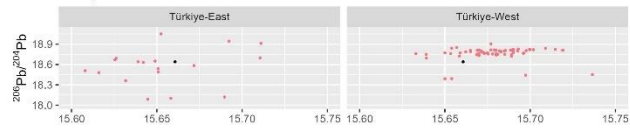

Sample 24-Quinarius-44-6

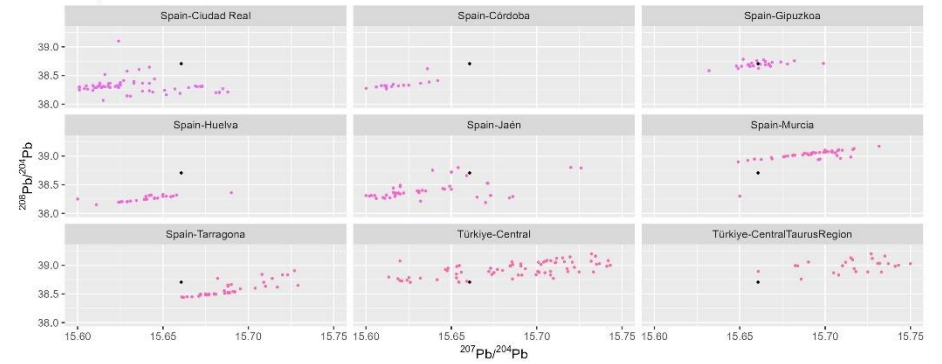

Sample 24-Quinarius-44-6

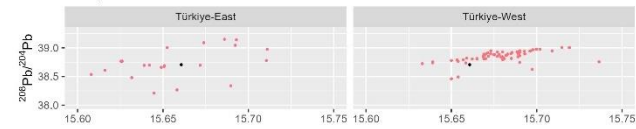

$^{207}\text{Pb}/^{204}\text{Pb}$

Sample 25-Victoriatus-112-1

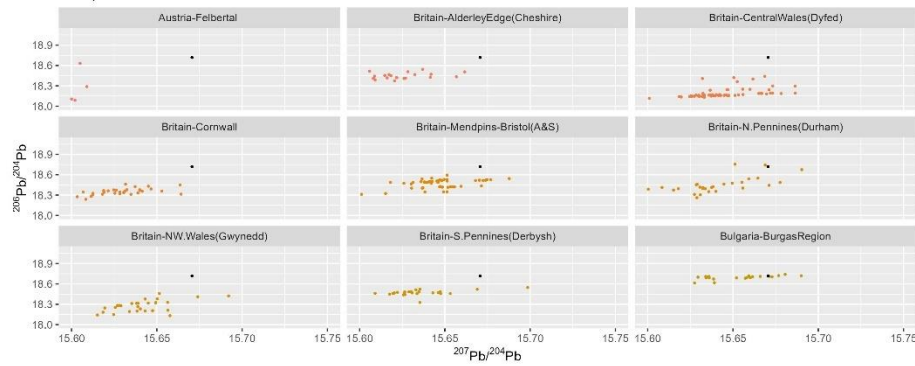

$^{207}\text{Pb}/^{204}\text{Pb}$

Sample 25-Victoriatus-112-1

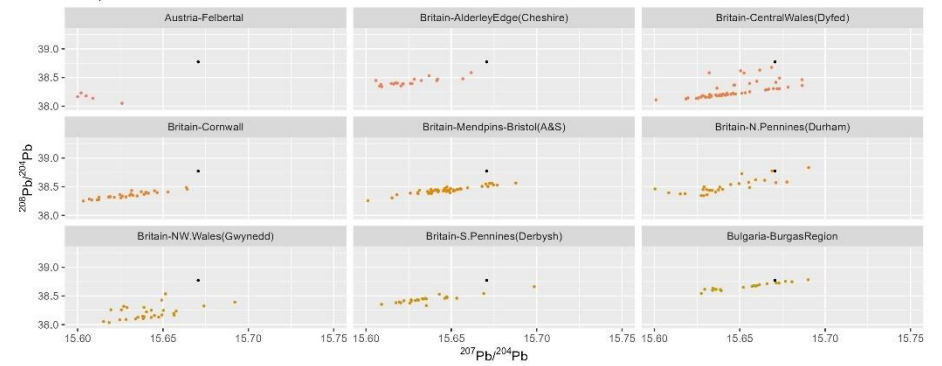

Sample 25-Victoriatus-112-1

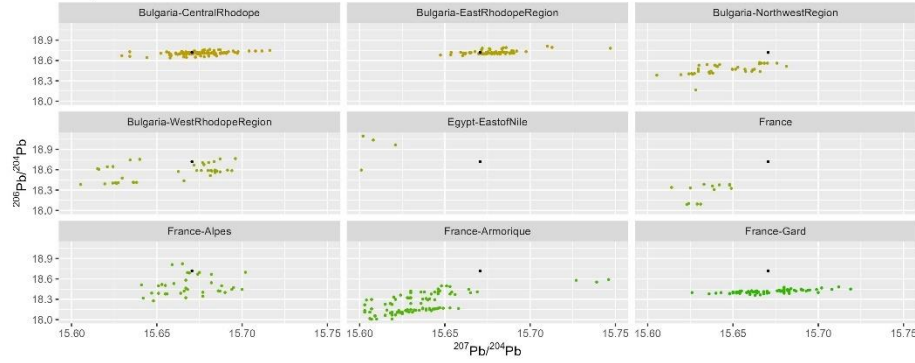

Sample 25-Victoriatus-112-1

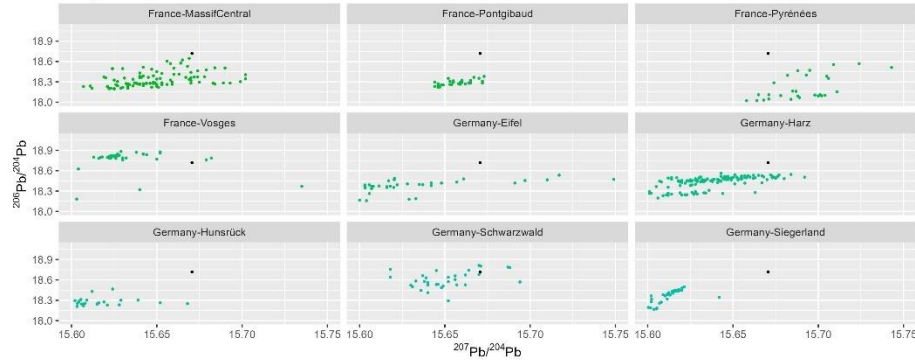

Sample 25-Victoriatus-112-1

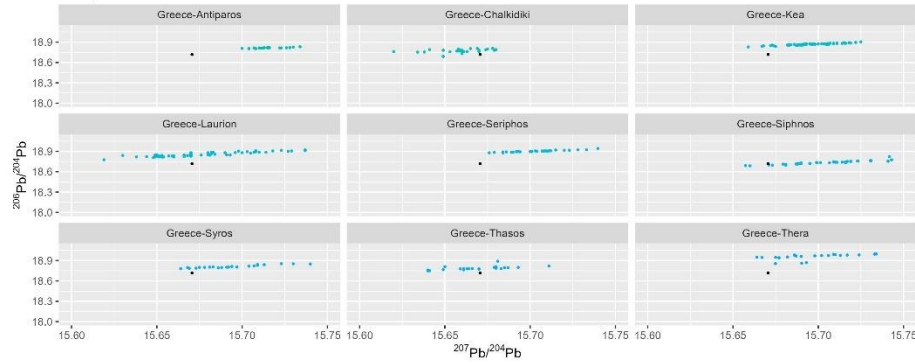

Sample 25-Victoriatus-112-1

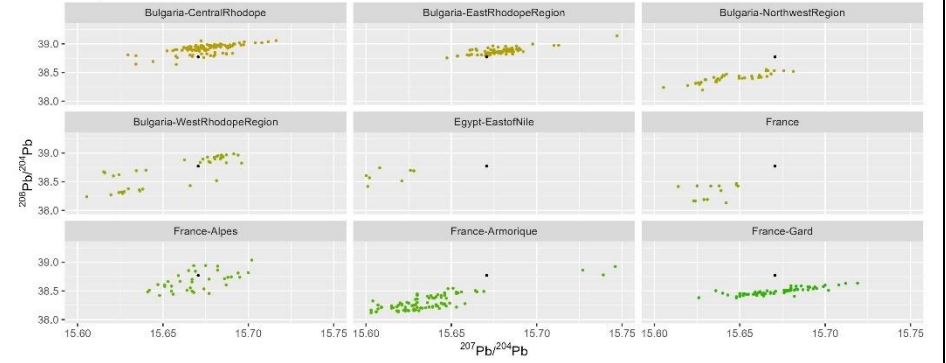

Sample 25-Victoriatus-112-1

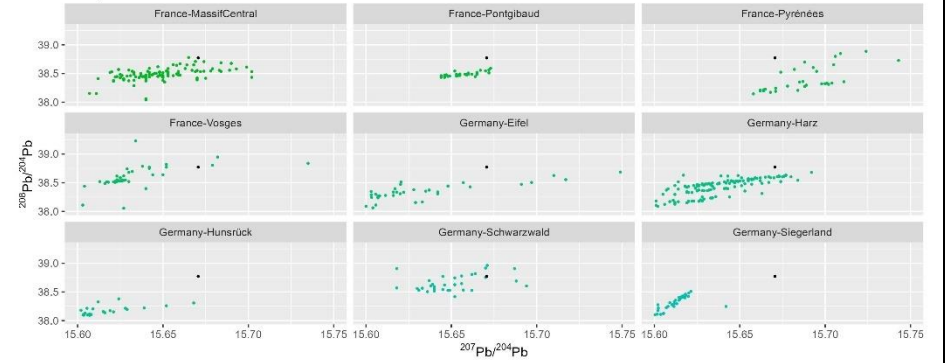

Sample 25-Victoriatus-112-1

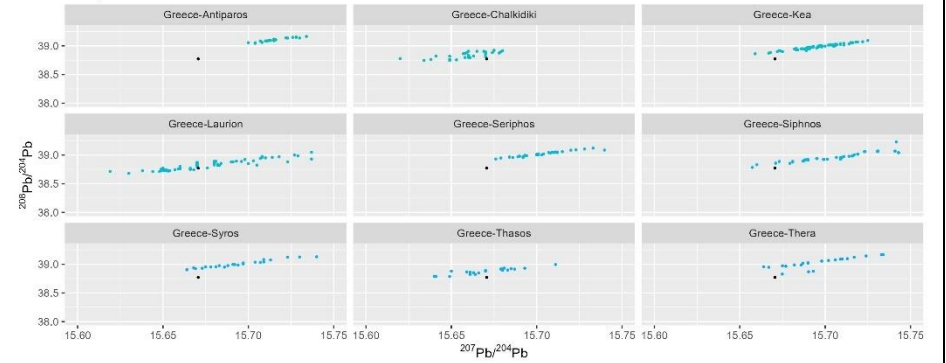



Sample 25-Victoriatus-112-1

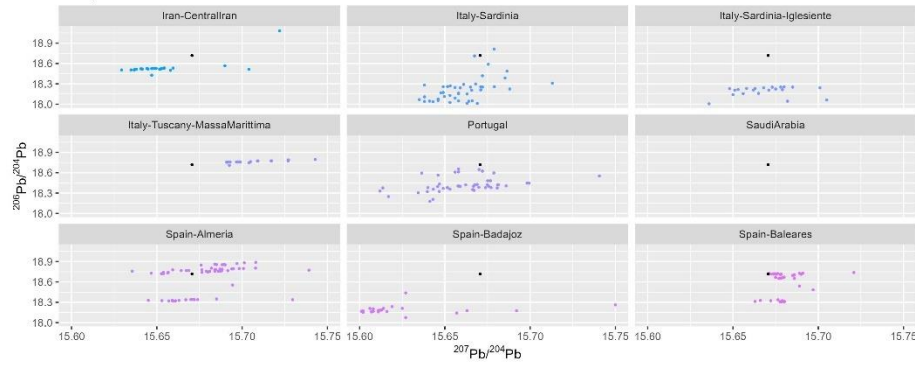

Sample 25-Victoriatus-112-1

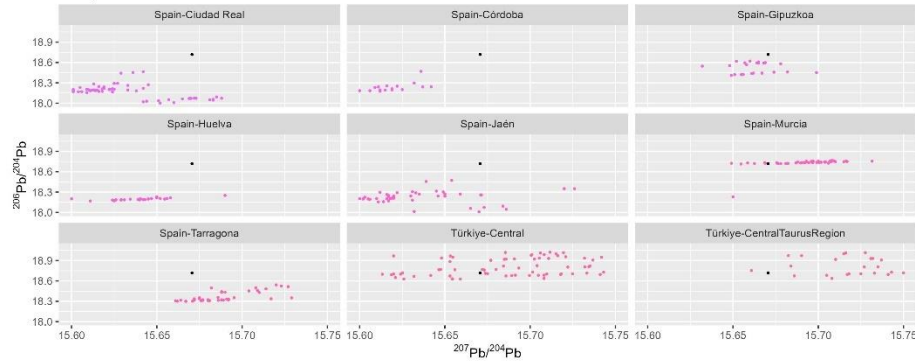

Sample 25-Victoriatus-112-1

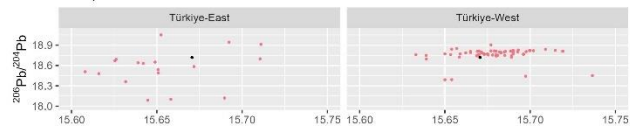

$^{207}\text{Pb}/^{204}\text{Pb}$

Sample 25-Victoriatus-112-1

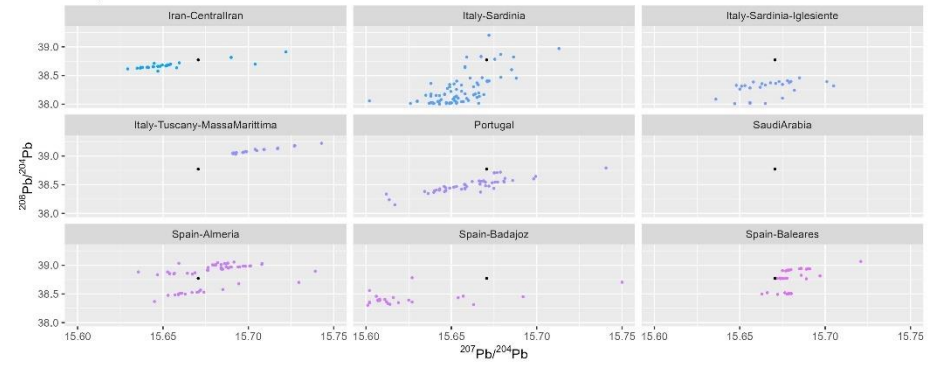

Sample 25-Victoriatus-112-1

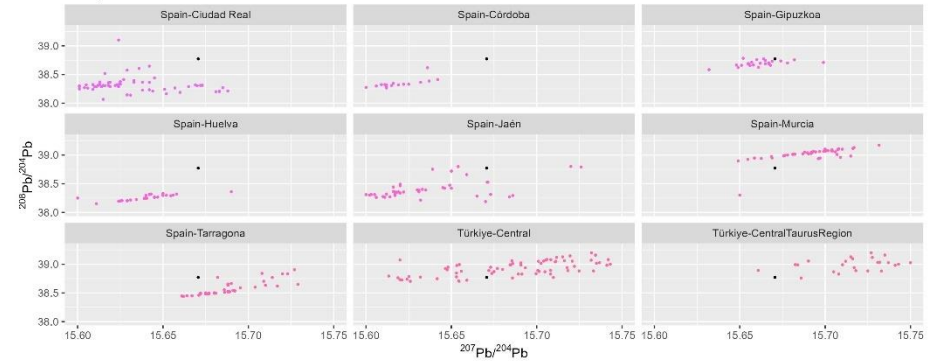

Sample 25-Victoriatus-112-1

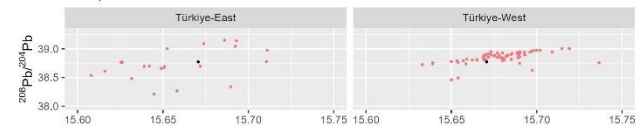

$^{207}\text{Pb}/^{204}\text{Pb}$

Sample 26-Victoriatus-102-1

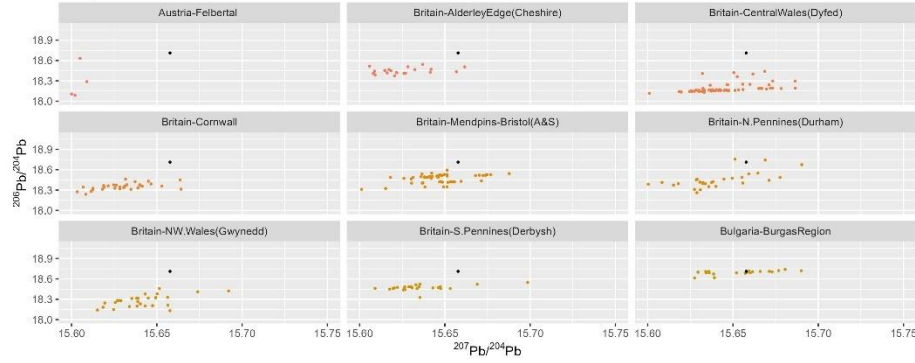

Sample 26-Victoriatus-102-1

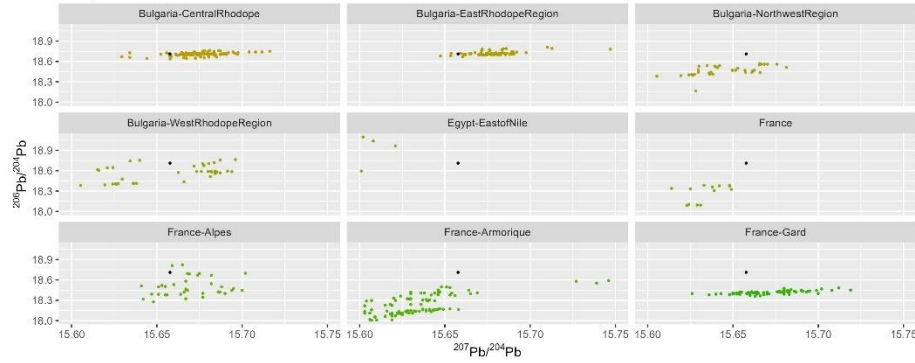

Sample 26-Victoriatus-102-1

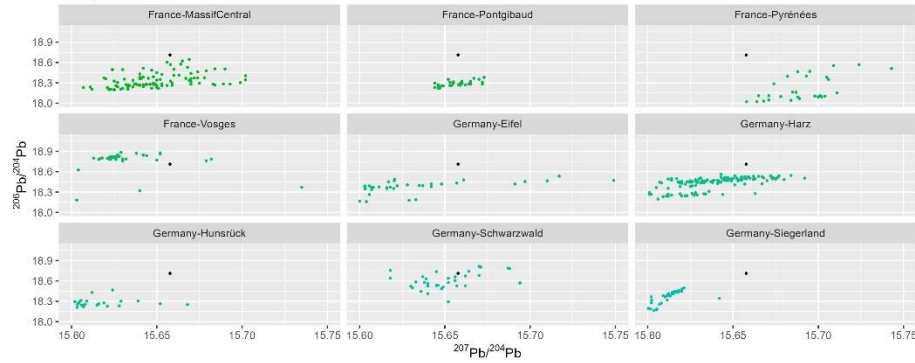

Sample 26-Victoriatus-102-1

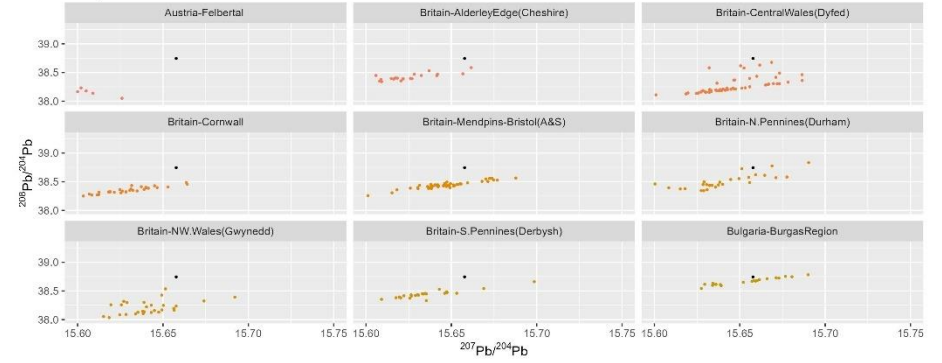

Sample 26-Victoriatus-102-1

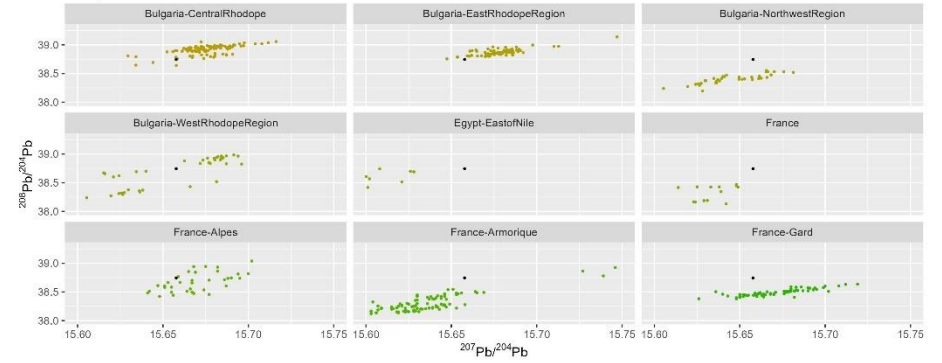

Sample 26-Victoriatus-102-1

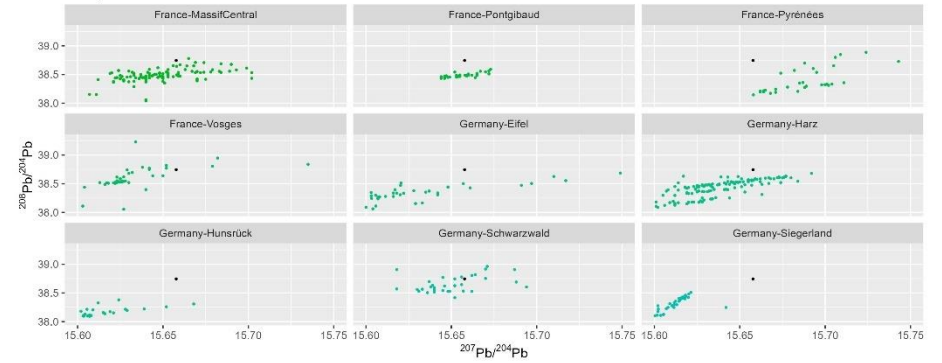

Sample 26-Victoriatus-102-1

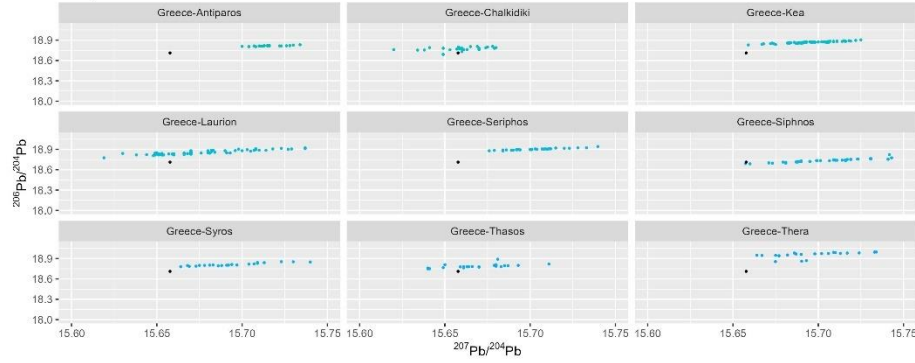

Sample 26-Victoriatus-102-1

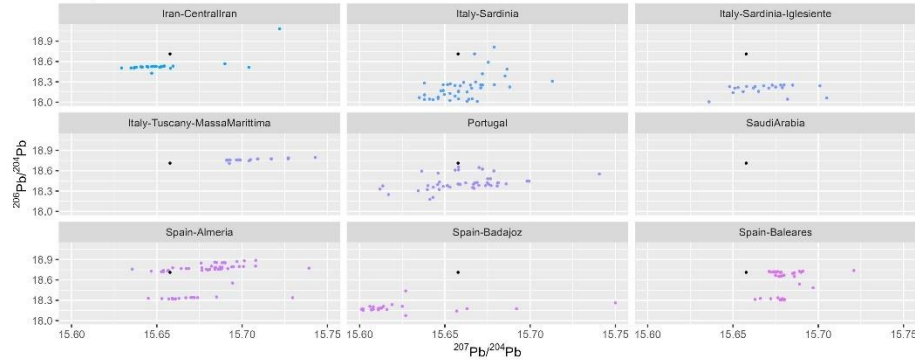

Sample 26-Victoriatus-102-1

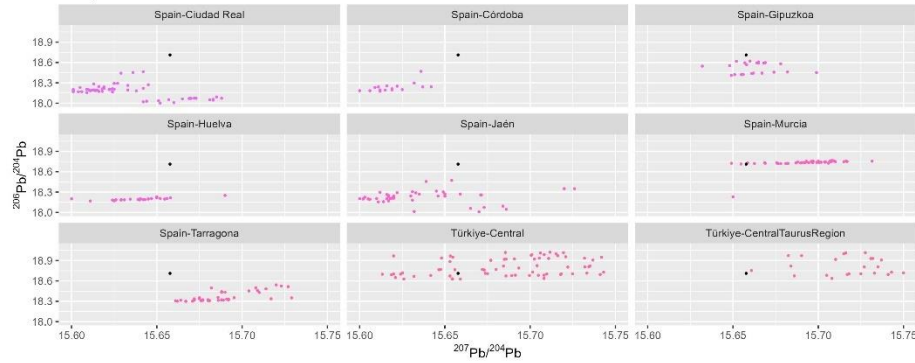

Sample 26-Victoriatus-102-1

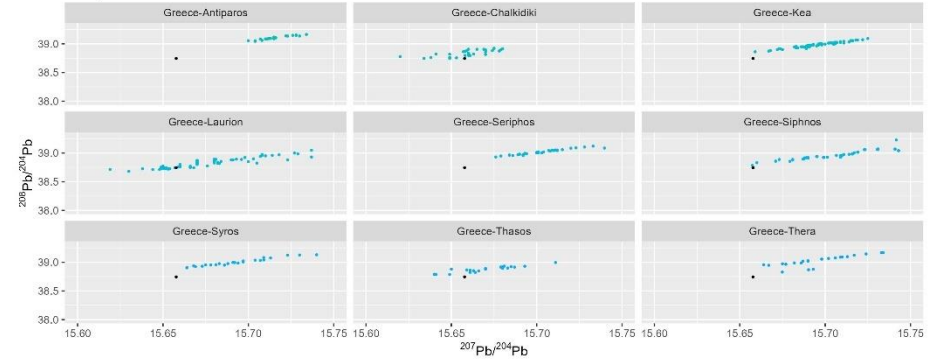

Sample 26-Victoriatus-102-1

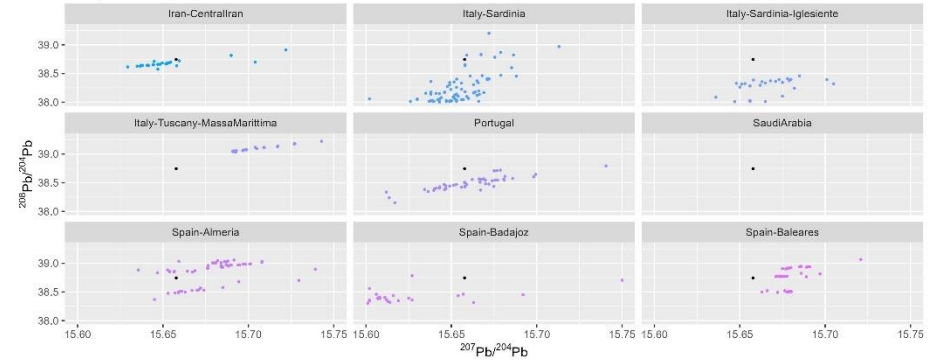

Sample 26-Victoriatus-102-1

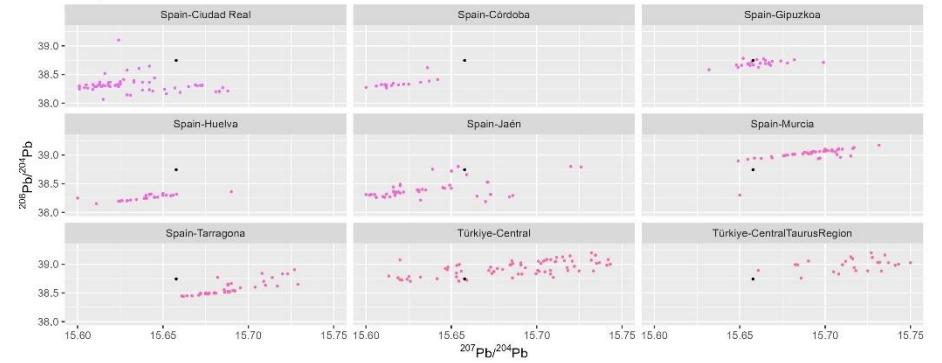

Sample 26-Victoriatus-102-1

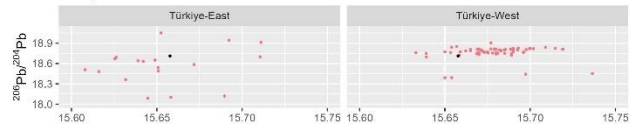

Sample DE003

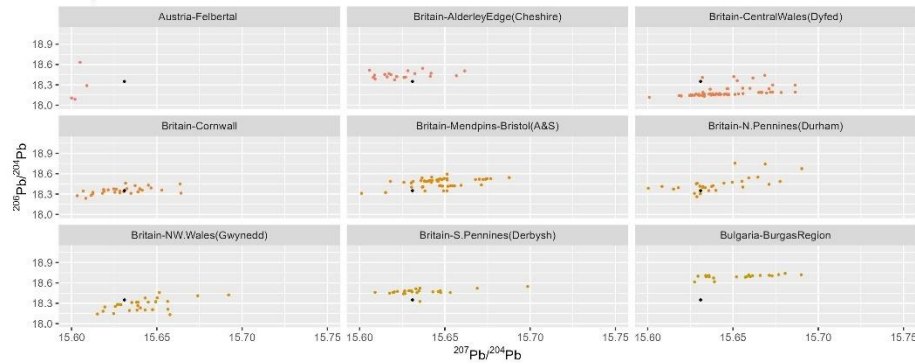

Sample DE003

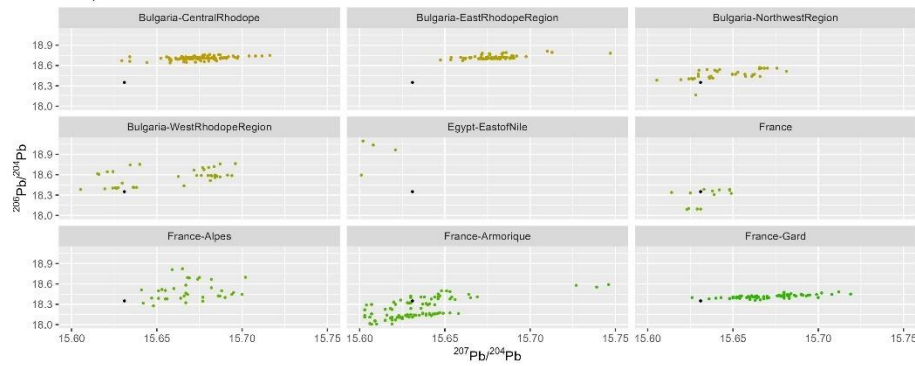

Sample 26-Victoriatus-102-1

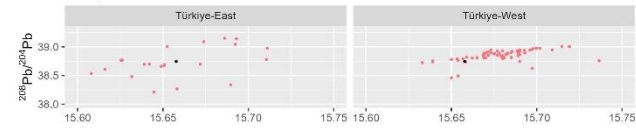

Sample DE003

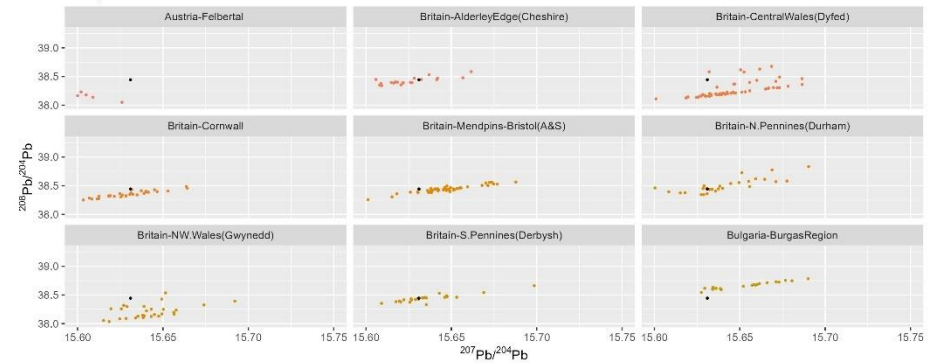

Sample DE003

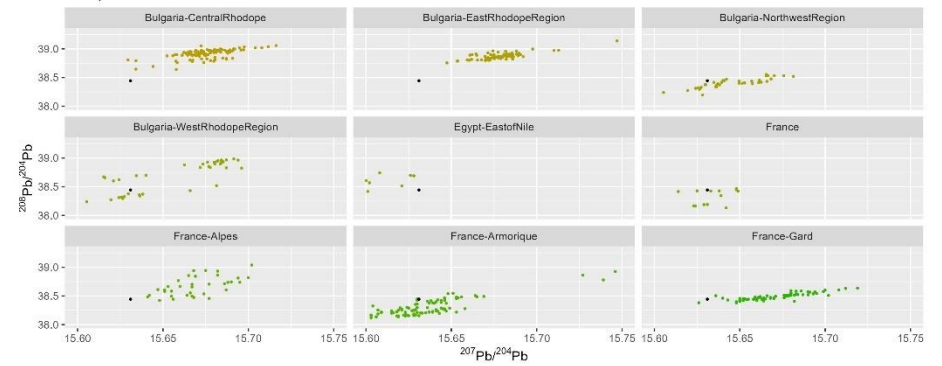



Sample DE003

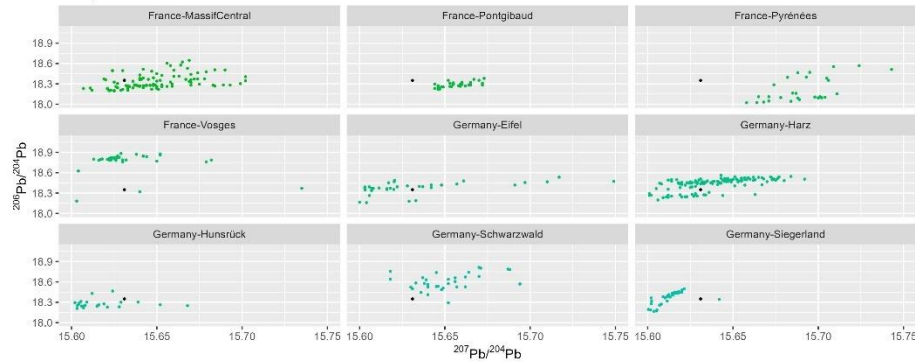

Sample DE003

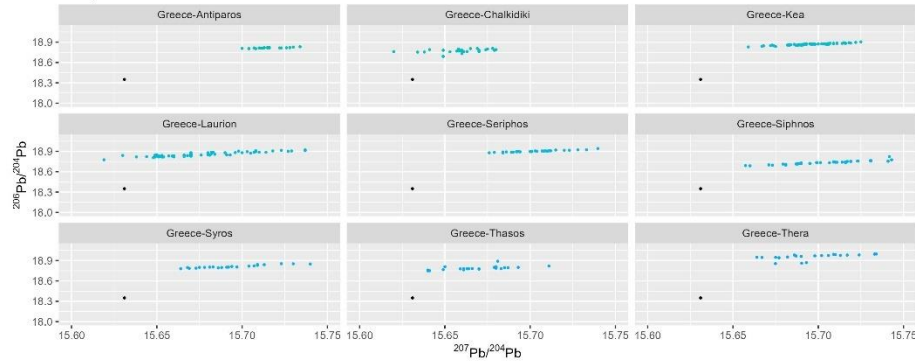

Sample DE003

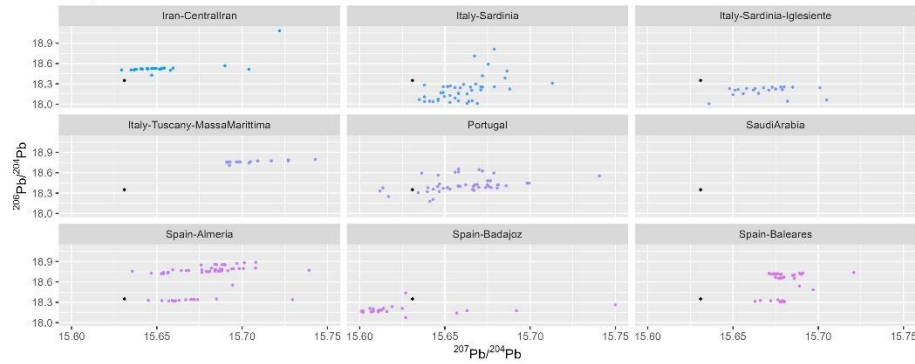

Sample DE003

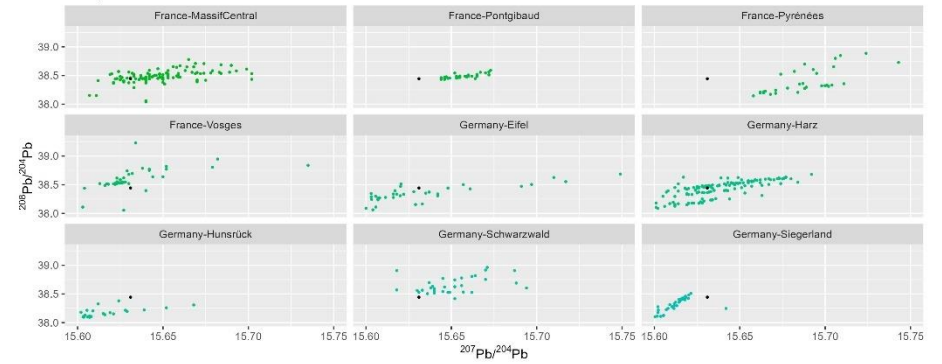

Sample DE003

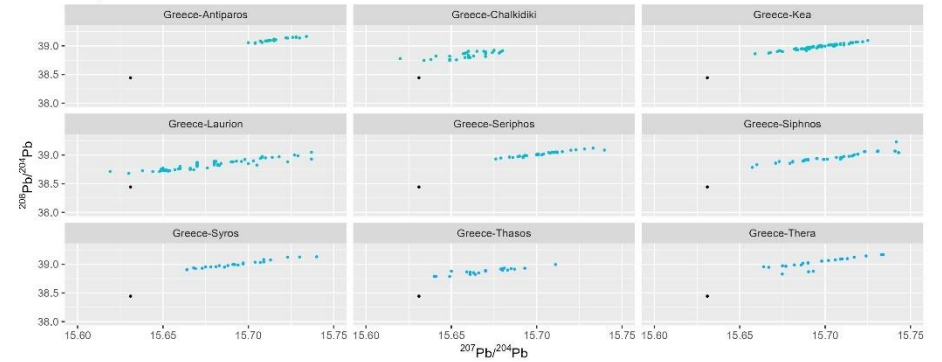

Sample DE003

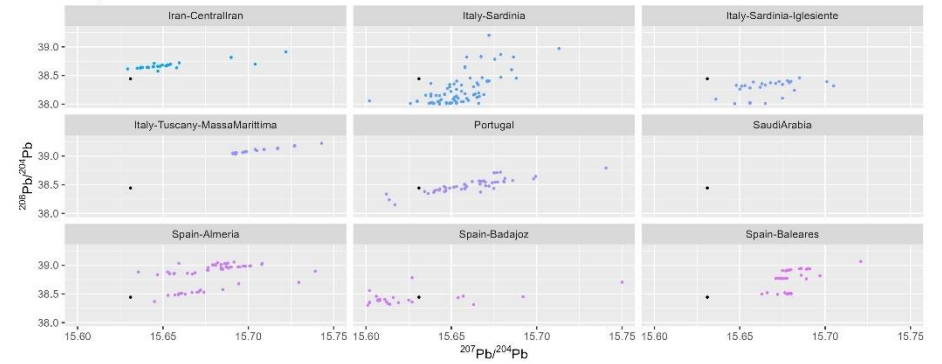

Sample DE003

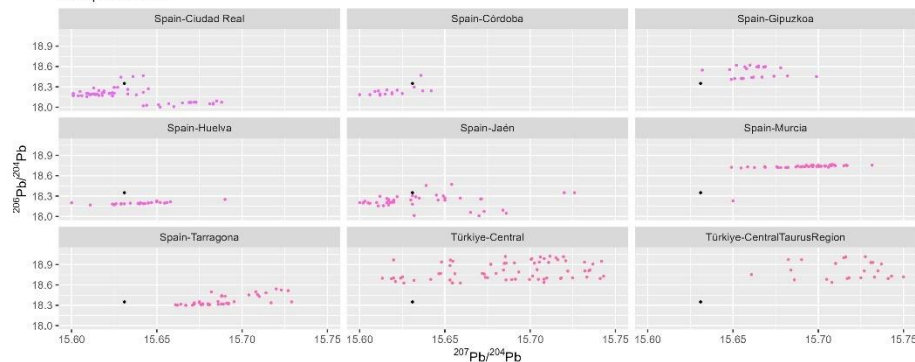

Sample DE003

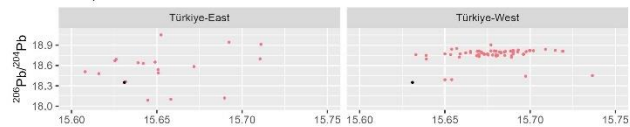

$^{207}\text{Pb}/^{204}\text{Pb}$

Sample DE004

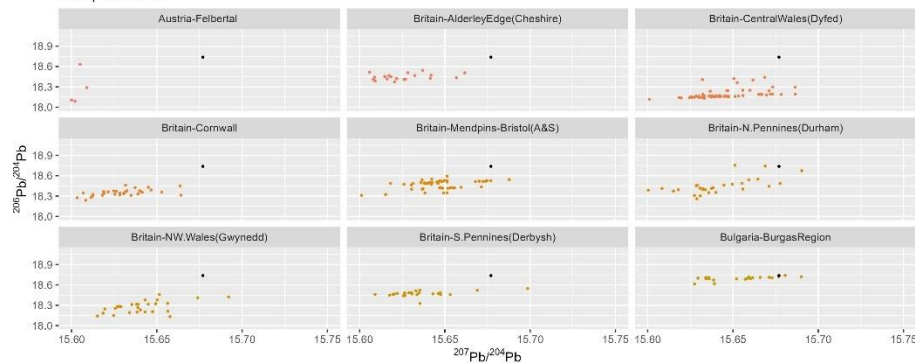

Sample DE003

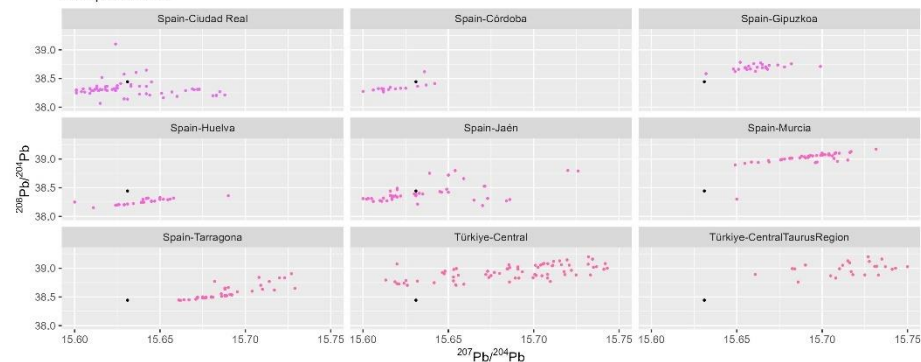

Sample DE003

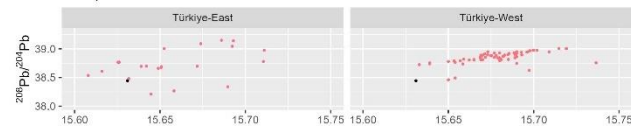

$^{207}\text{Pb}/^{204}\text{Pb}$

Sample DE004

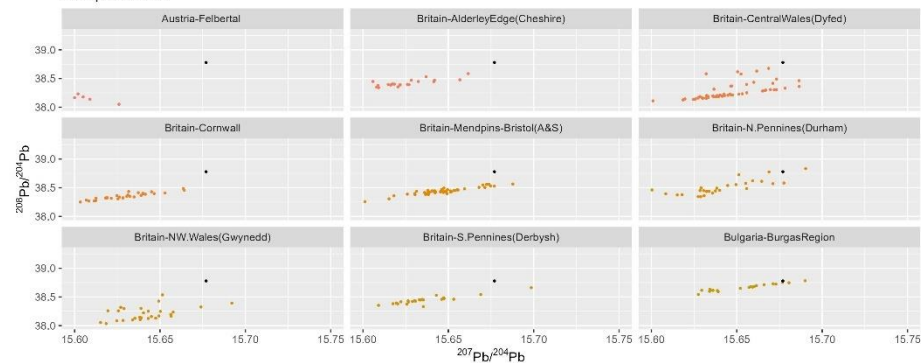

Sample DE004

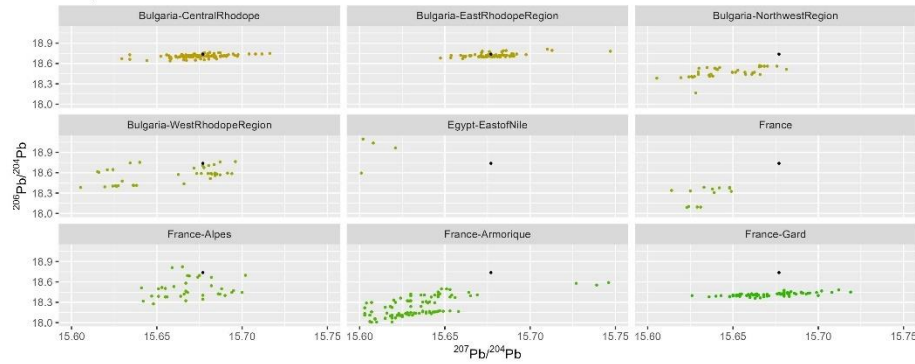

Sample DE004

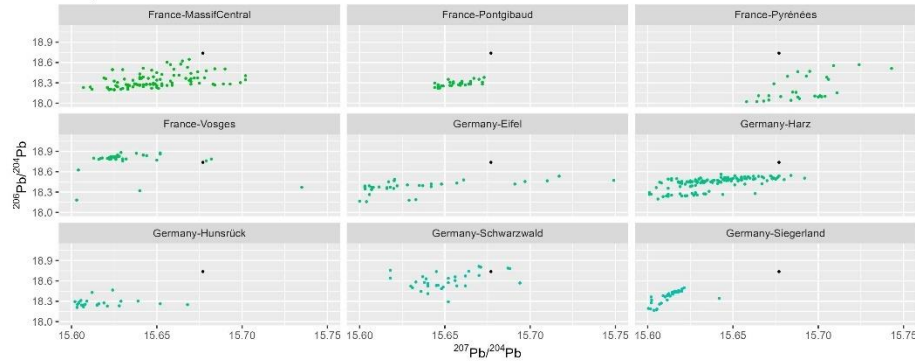

Sample DE004

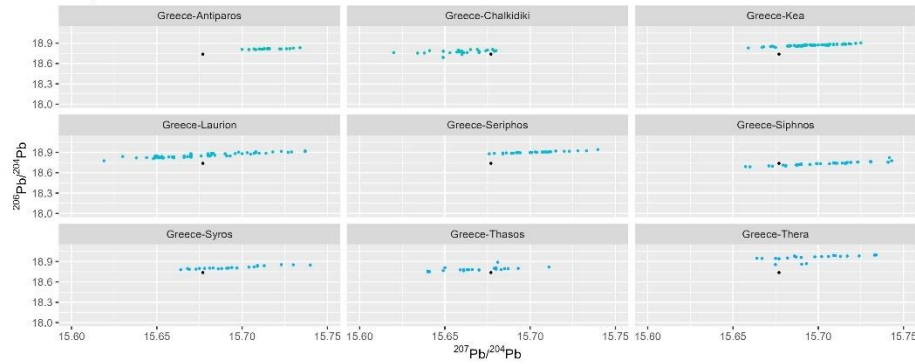

Sample DE004

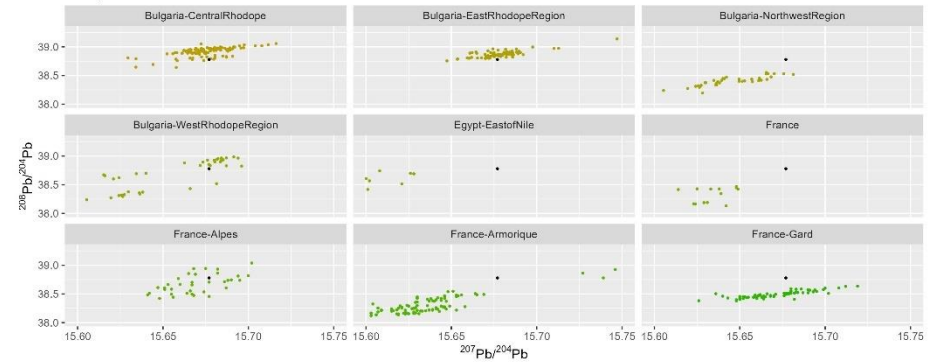

Sample DE004

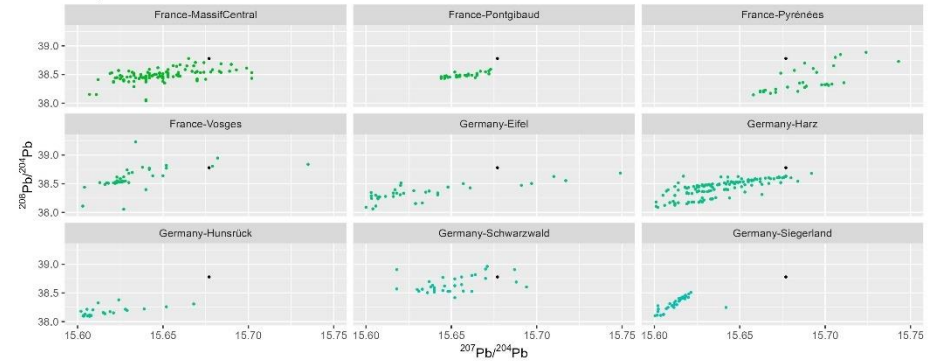

Sample DE004

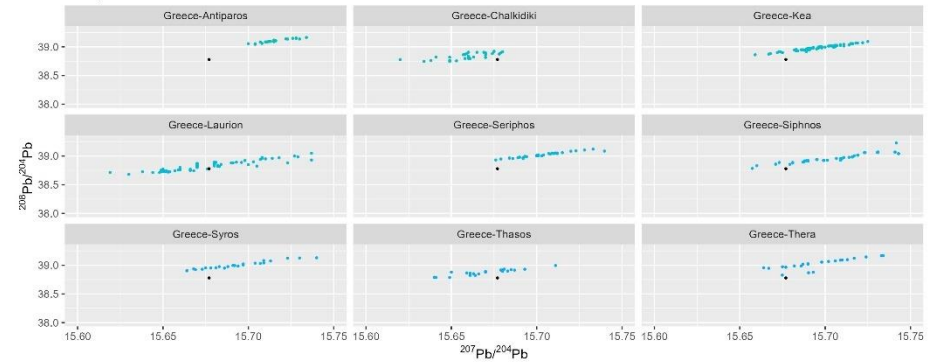



Sample DE004

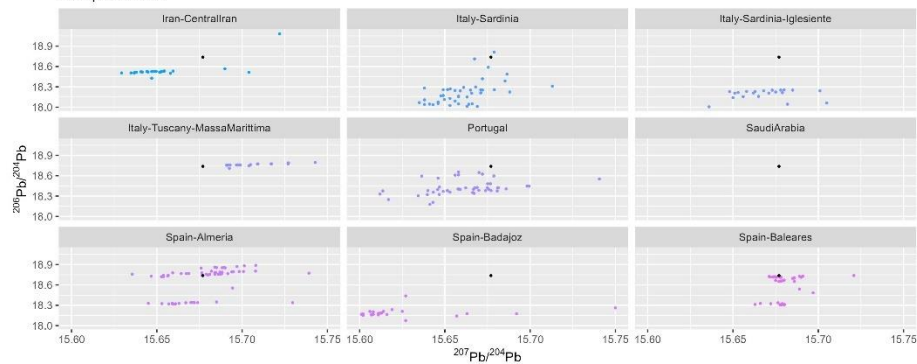

Sample DE004

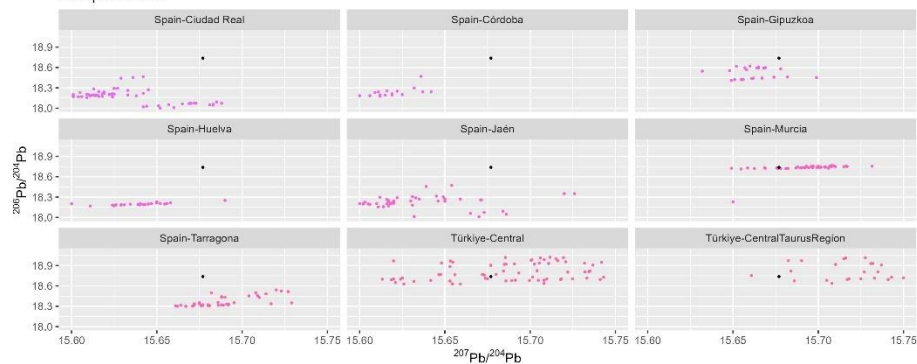

Sample DE004

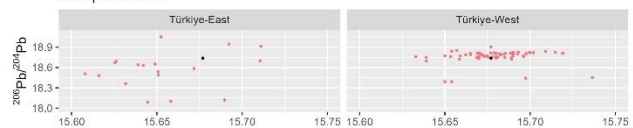 $^{207}\text{Pb}/^{204}\text{Pb}$ 

Sample DE004

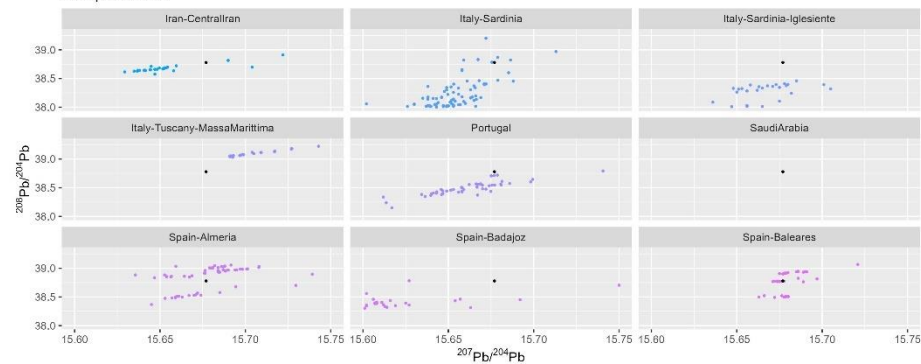

Sample DE004

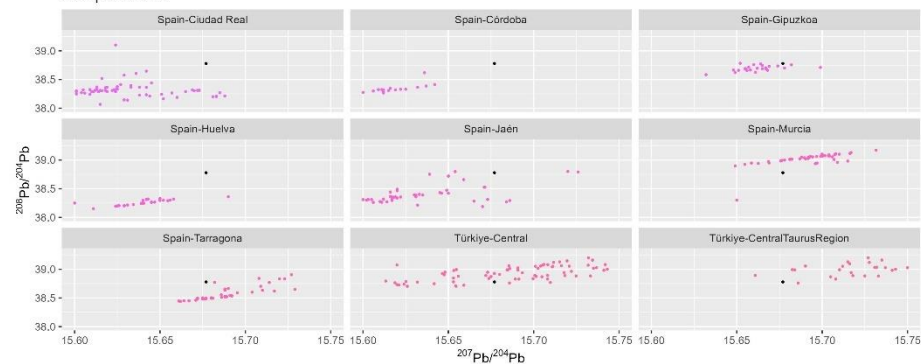

Sample DE004

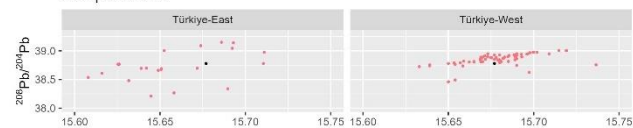 $^{207}\text{Pb}/^{204}\text{Pb}$

Sample GE056

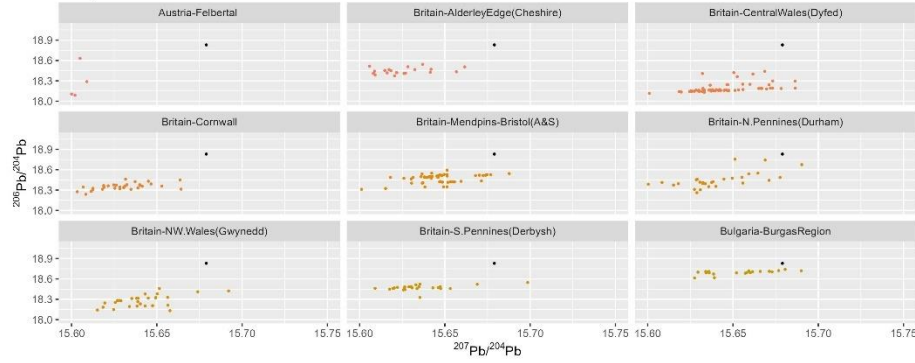

Sample GE056

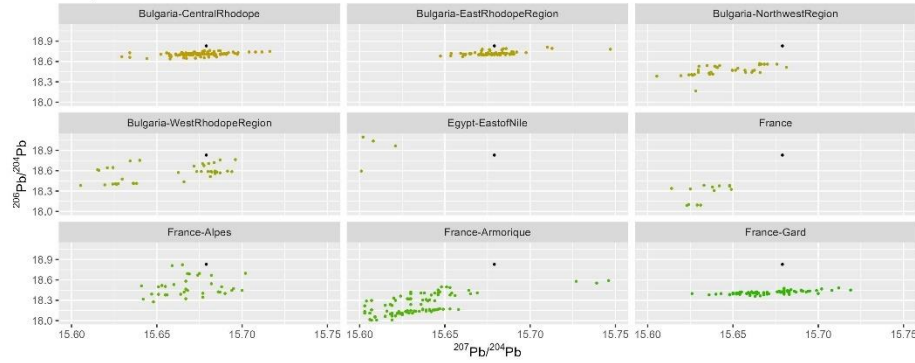

Sample GE056

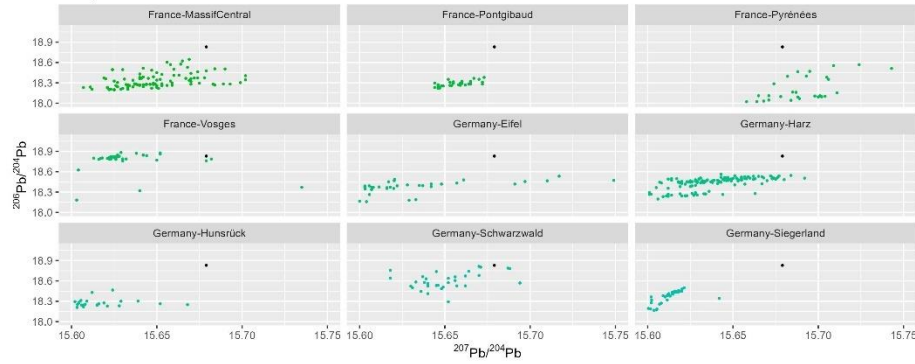

Sample GE056

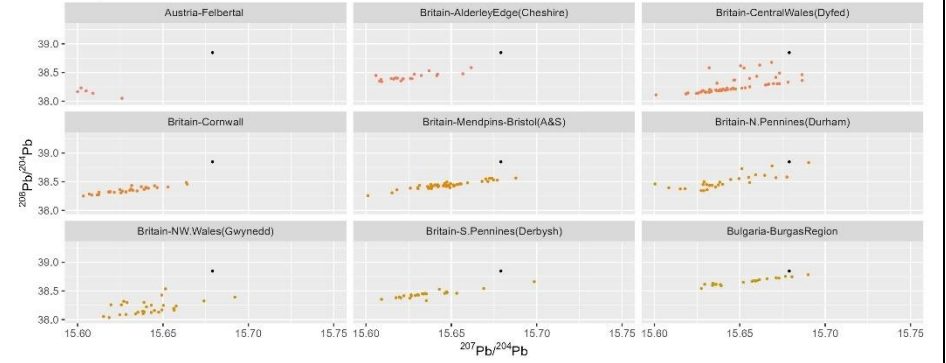

Sample GE056

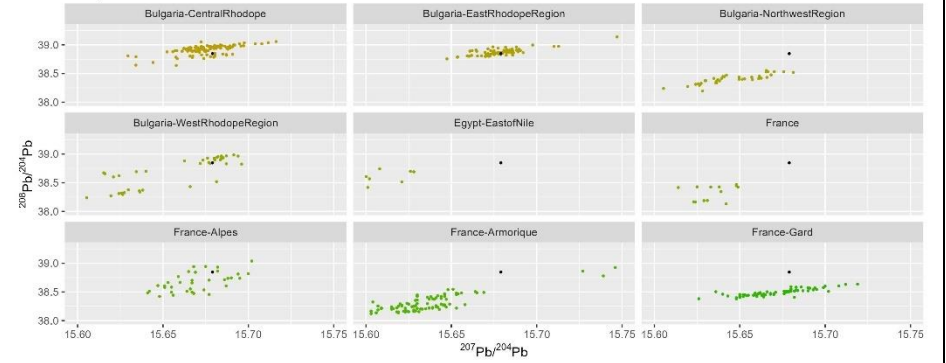

Sample GE056

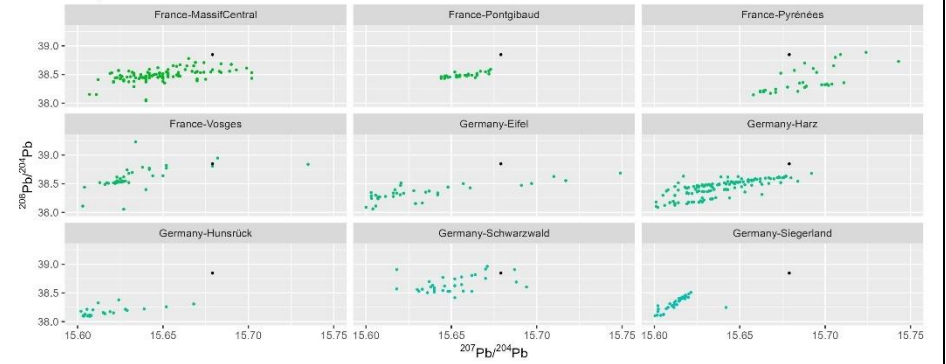

Sample GE056

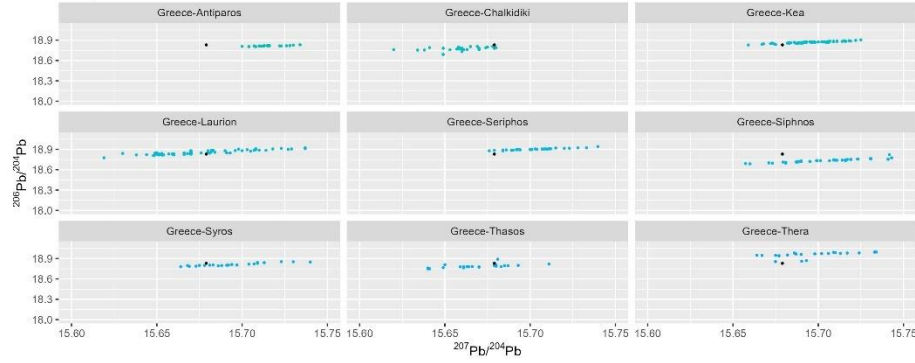

Sample GE056

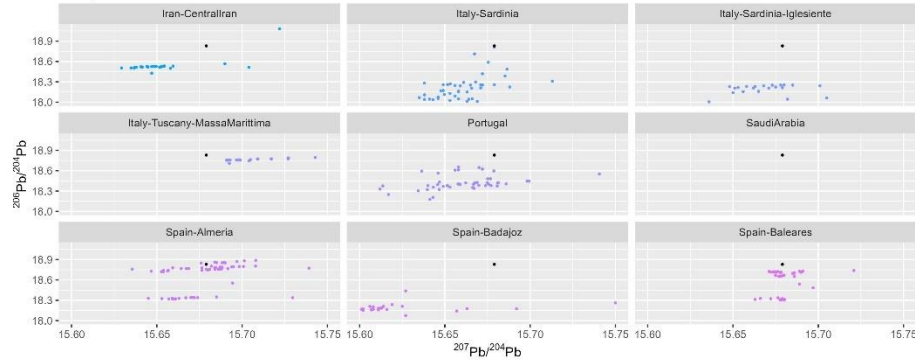

Sample GE056

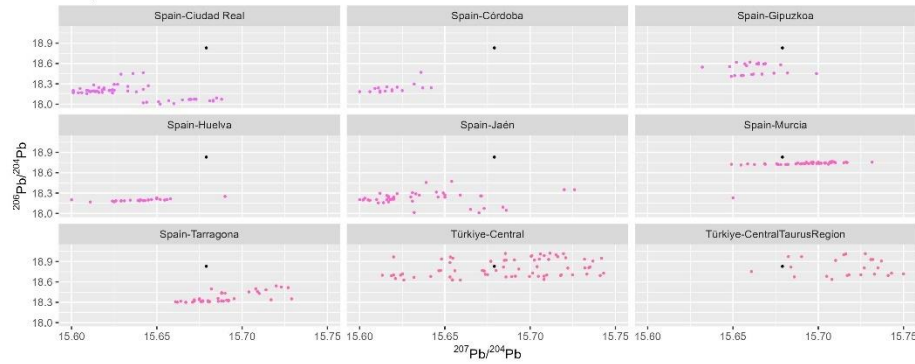

Sample GE056

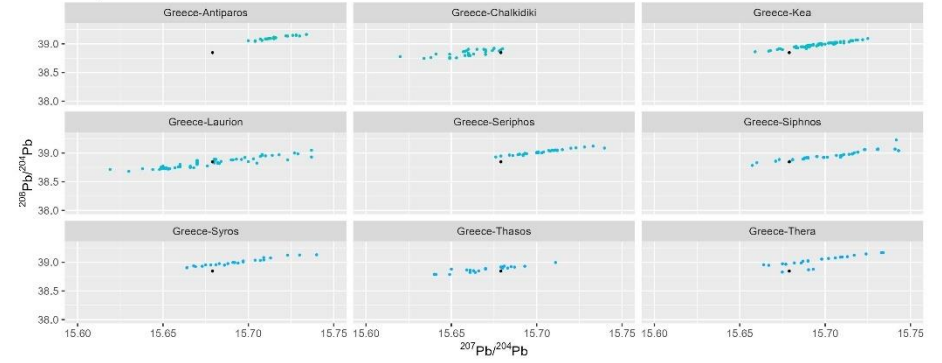

Sample GE056

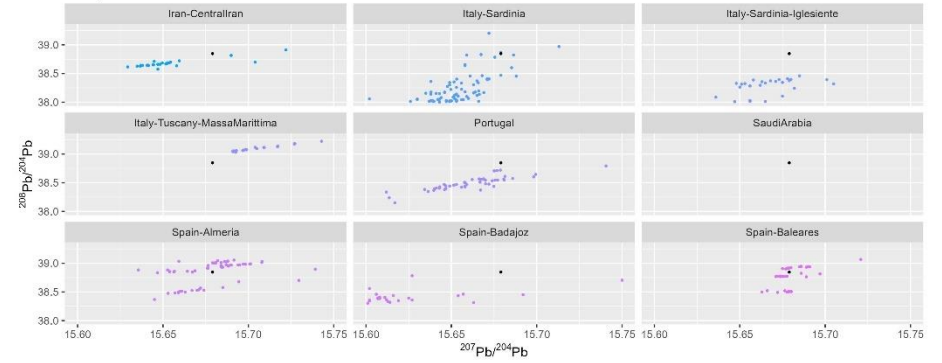

Sample GE056

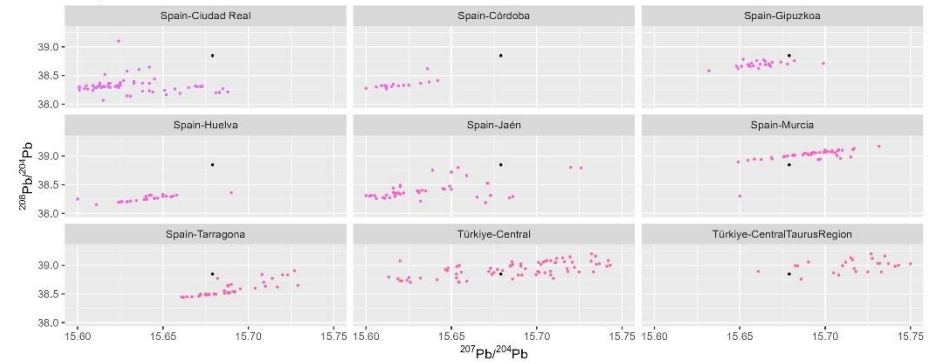

Sample GE056

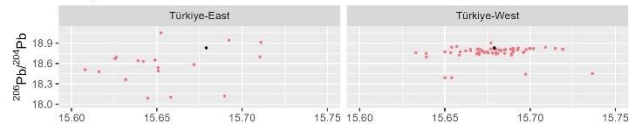

Sample GE056

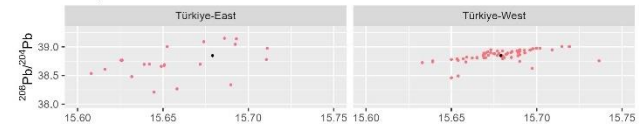

Sample GE057

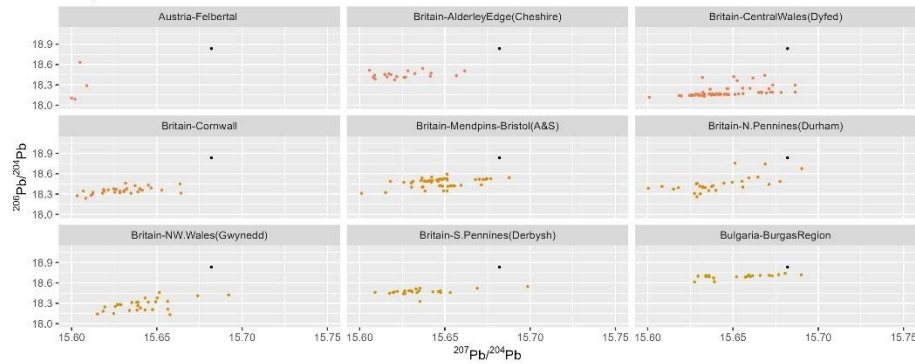

Sample GE057

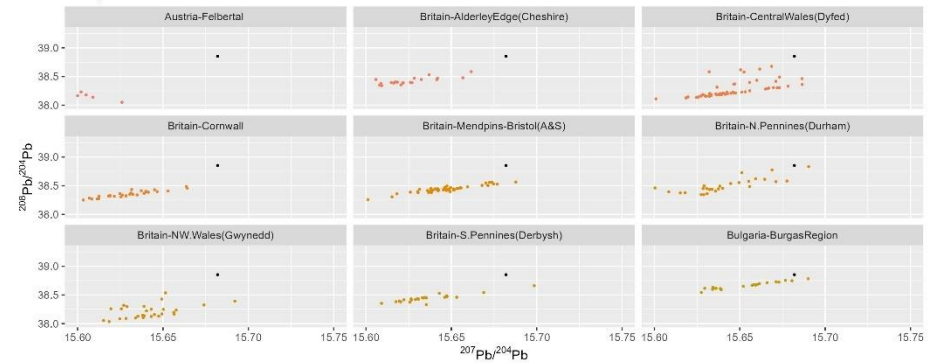

Sample GE057

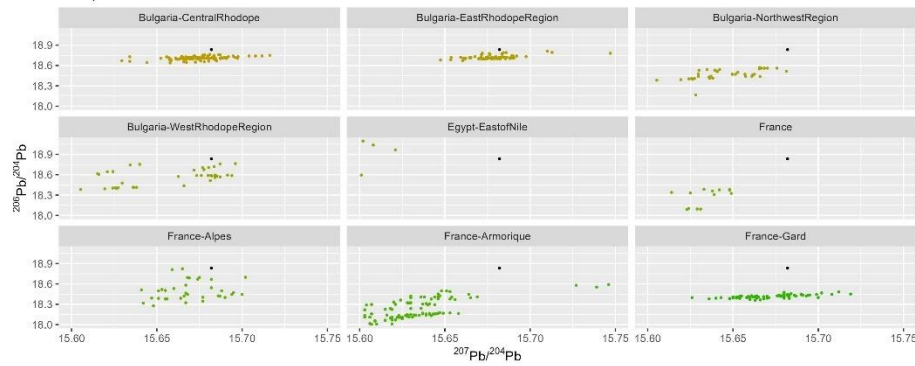

Sample GE057

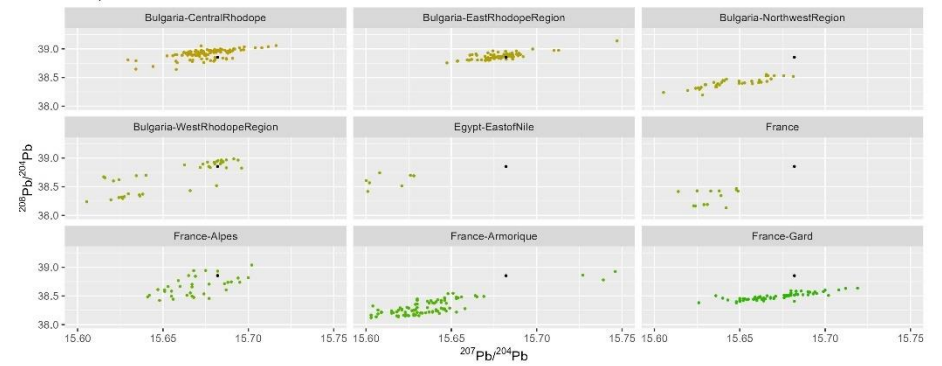



Sample GE057

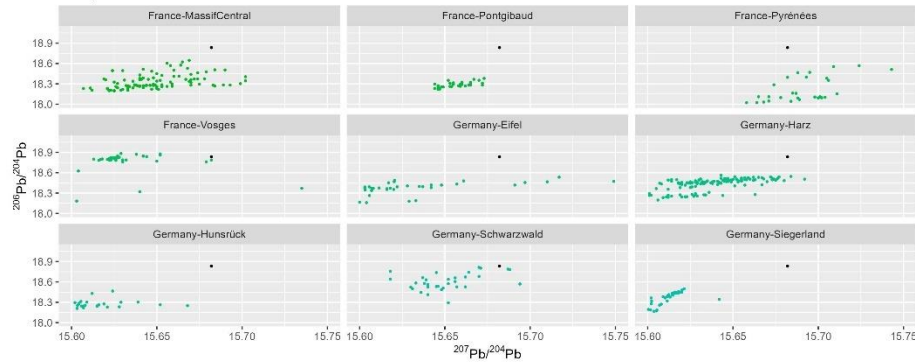

Sample GE057

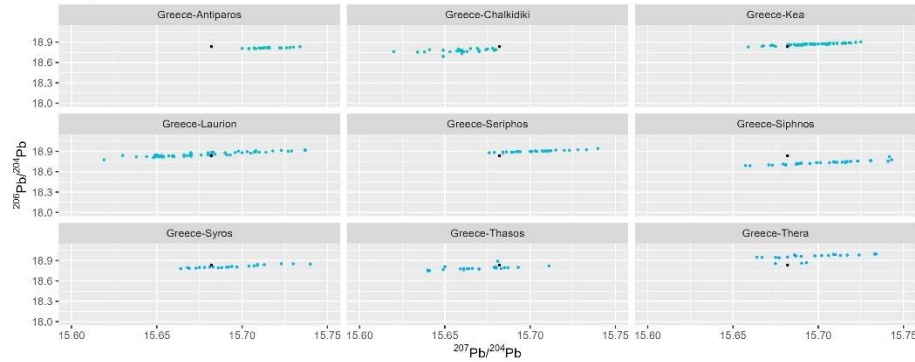

Sample GE057

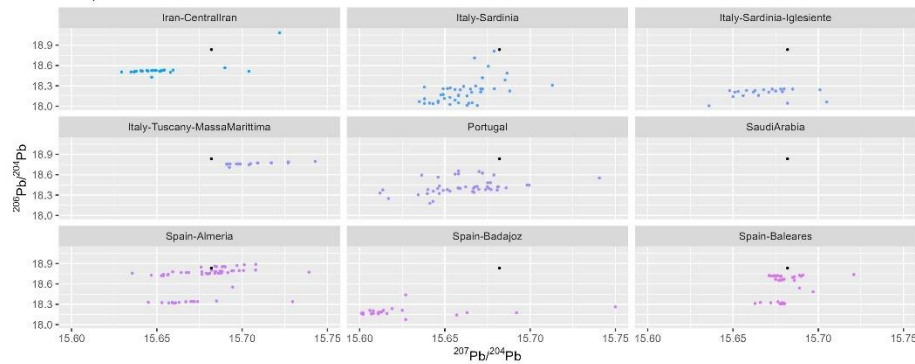

Sample GE057

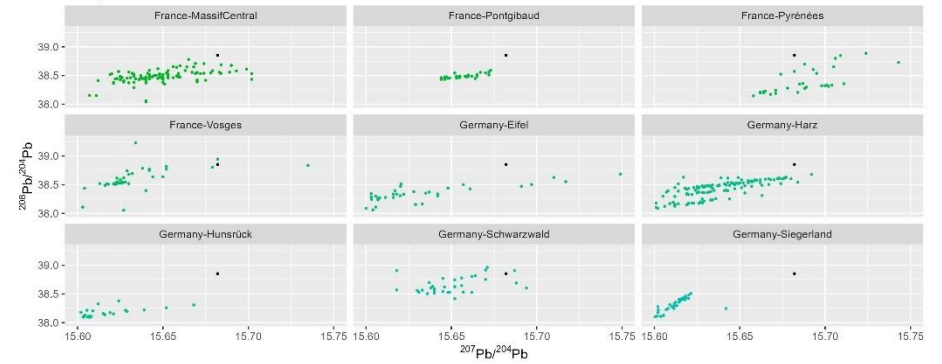

Sample GE057

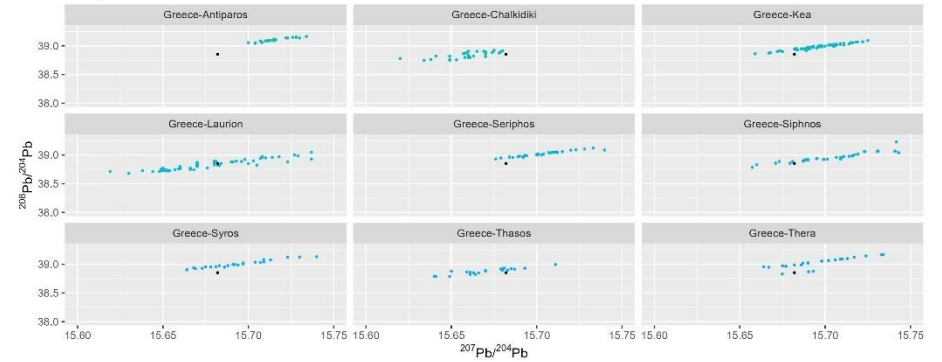

Sample GE057

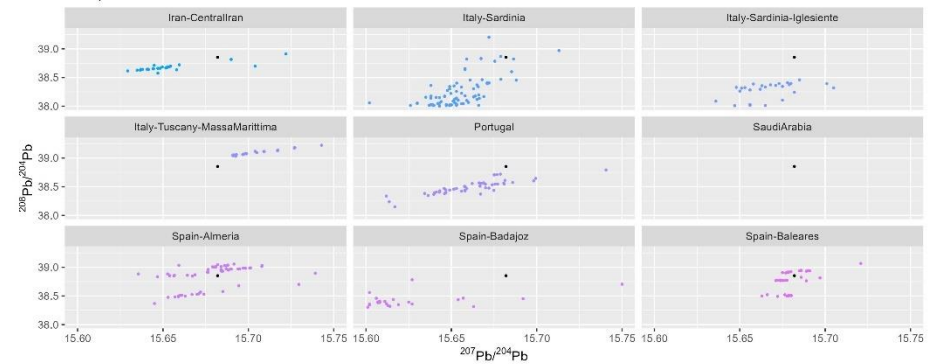

Sample GE057

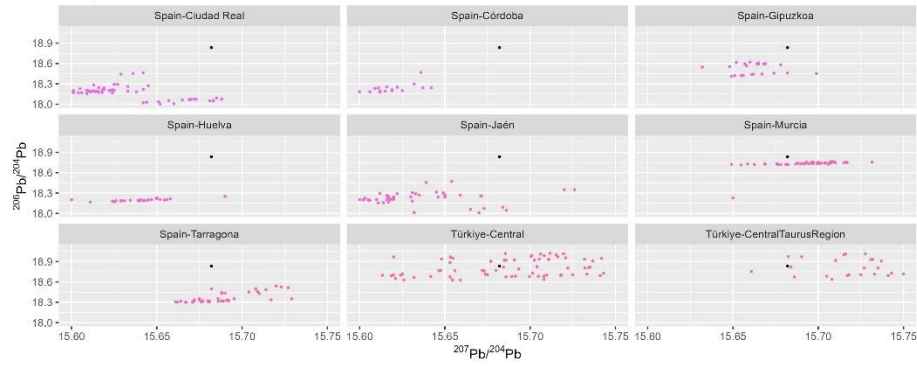

Sample GE057

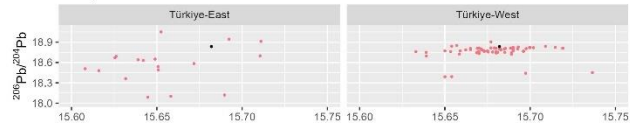

Sample GE057

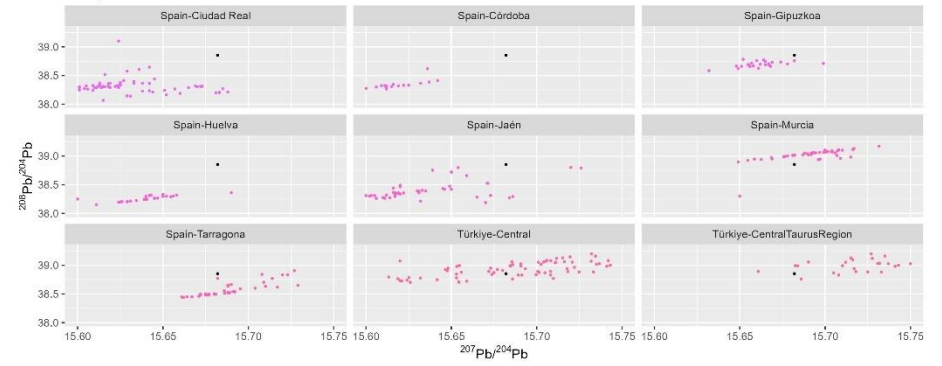

Sample GE057

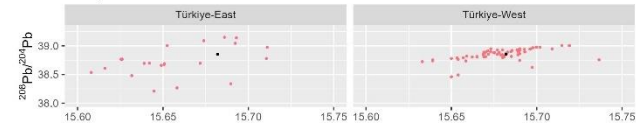

$^{207}\text{Pb}/^{204}\text{Pb}$

Sample MS002

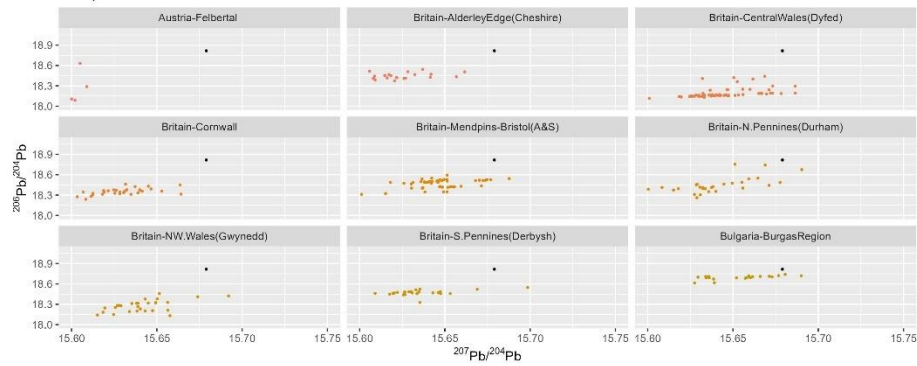

$^{207}\text{Pb}/^{204}\text{Pb}$

Sample MS002

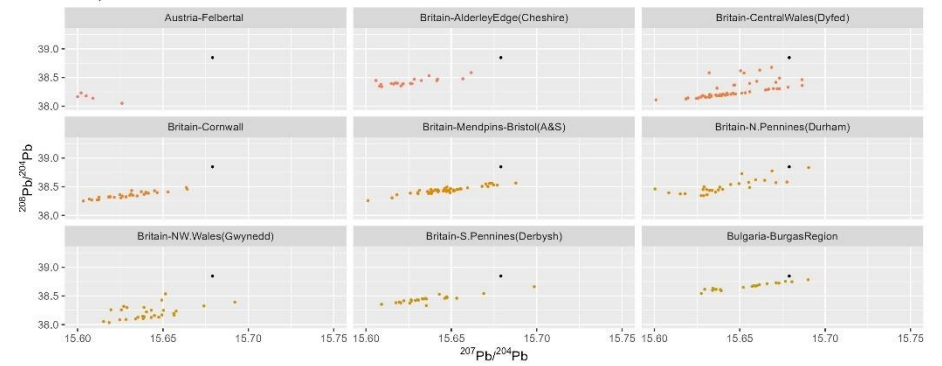



Sample MS002

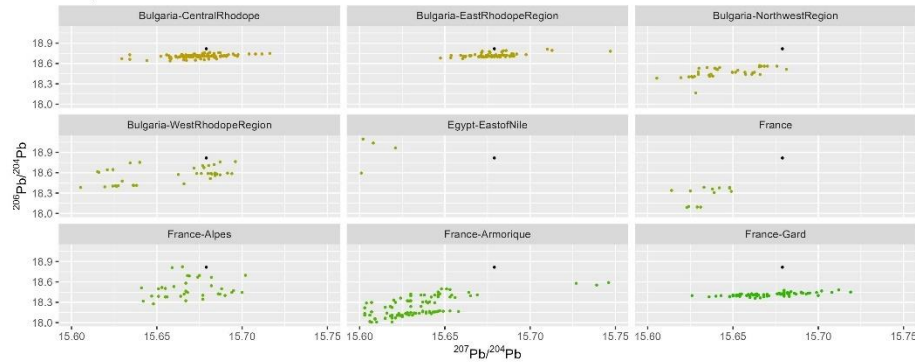

Sample MS002

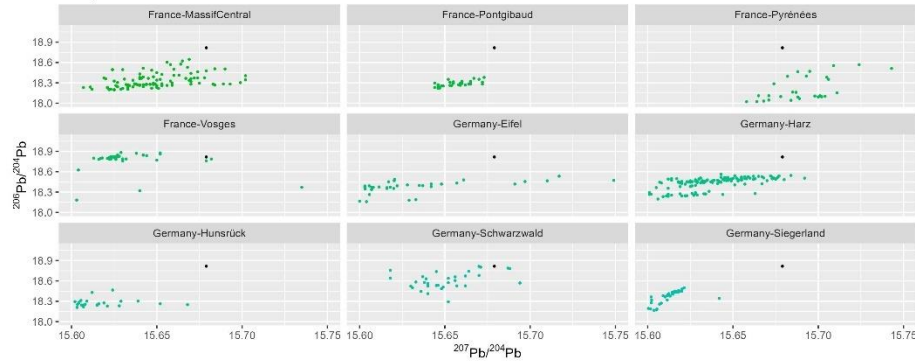

Sample MS002

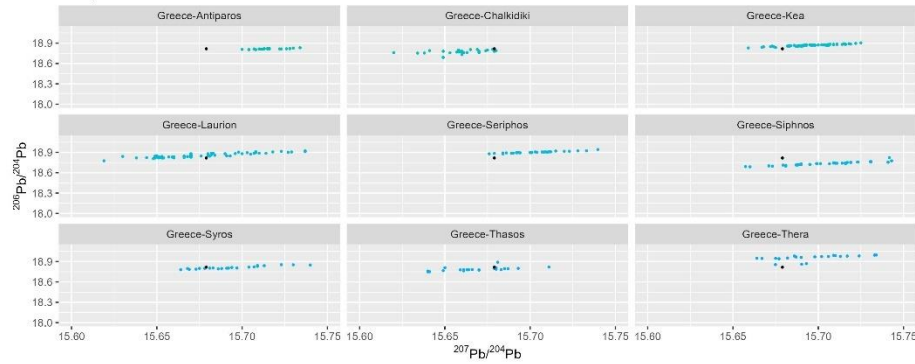

Sample MS002

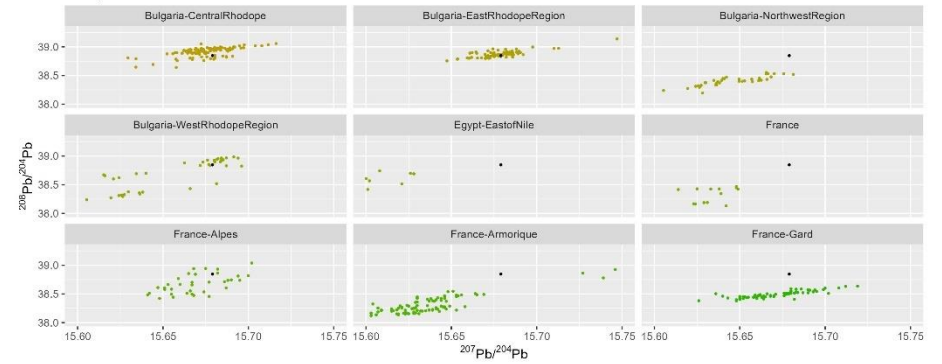

Sample MS002

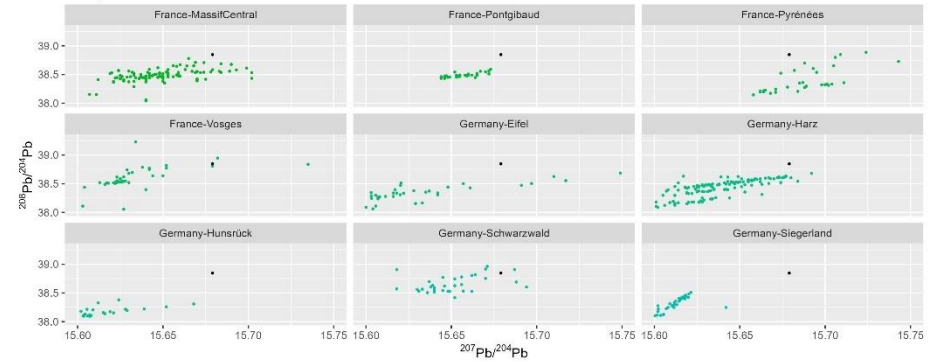

Sample MS002

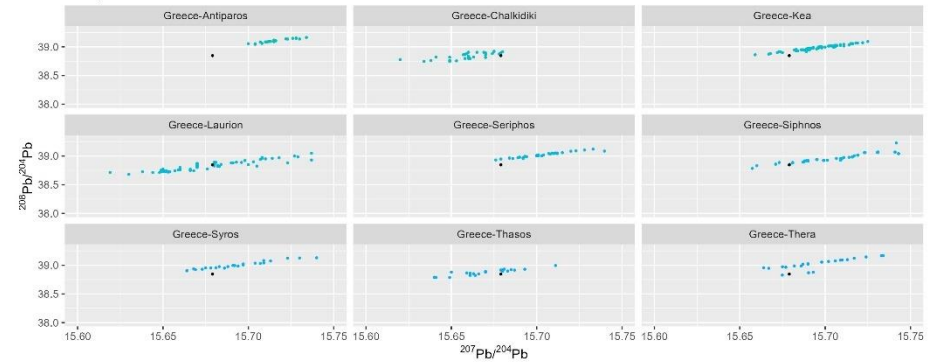

Sample MS002

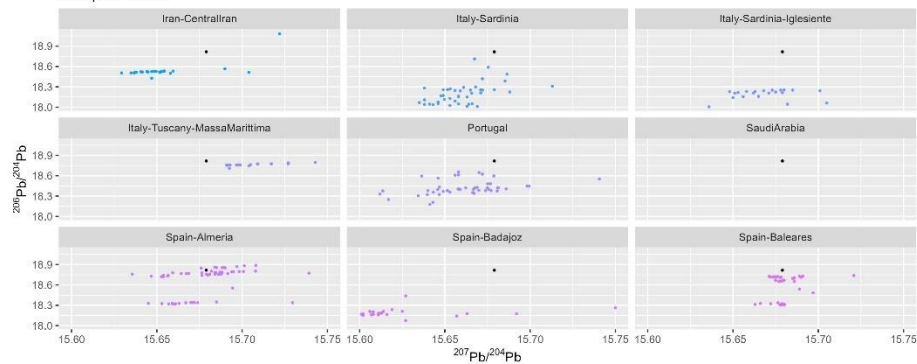

Sample MS002

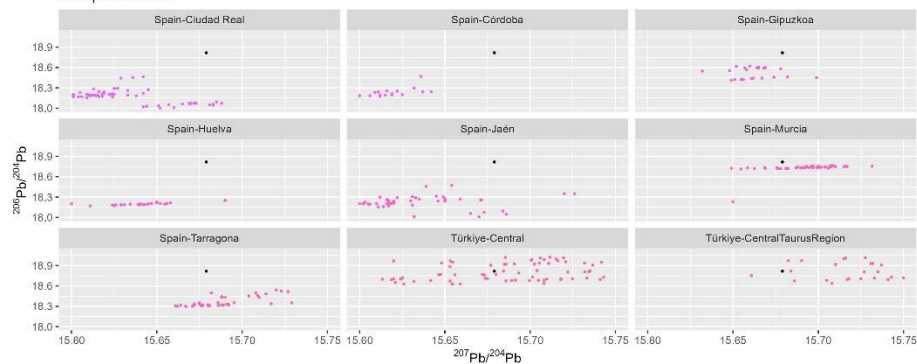

Sample MS002

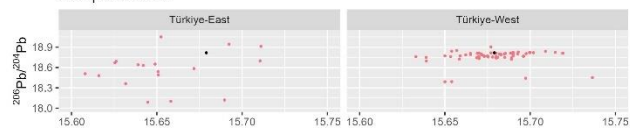

$^{207}\text{Pb}/^{204}\text{Pb}$

Sample MS002

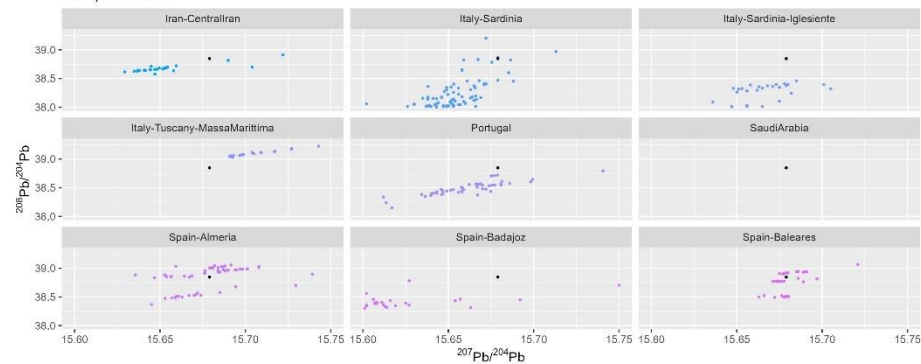

Sample MS002

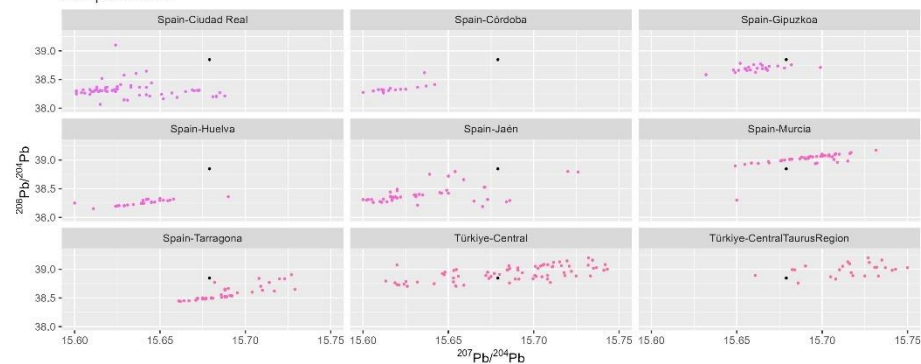

Sample MS002

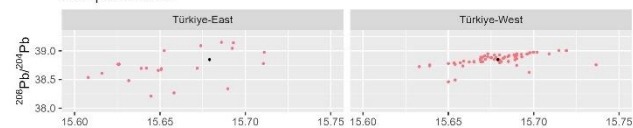

$^{207}\text{Pb}/^{204}\text{Pb}$

Sample MS003

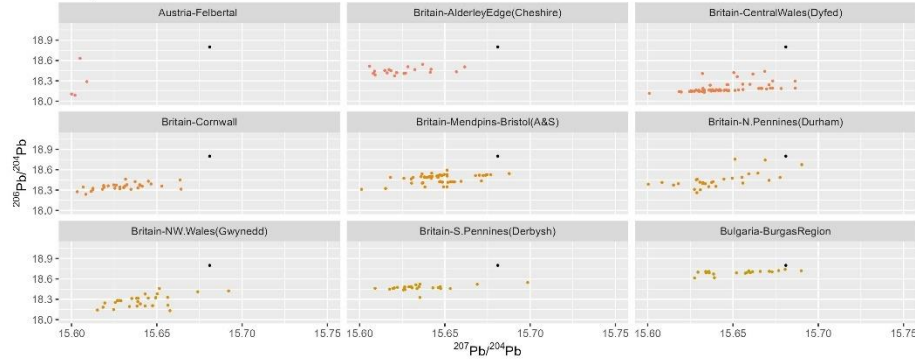

Sample MS003

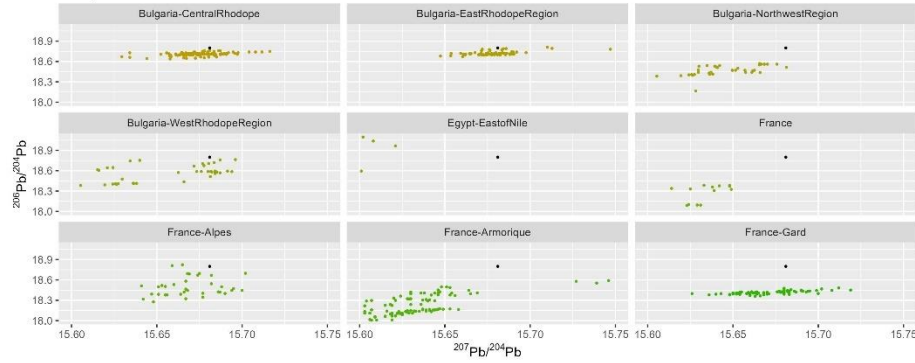

Sample MS003

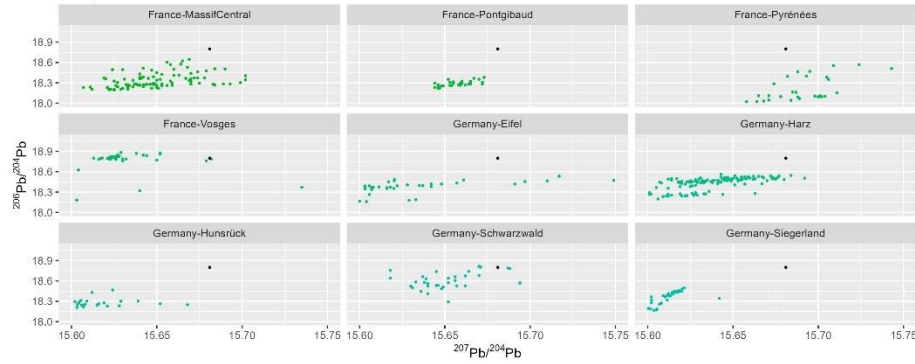

Sample MS003

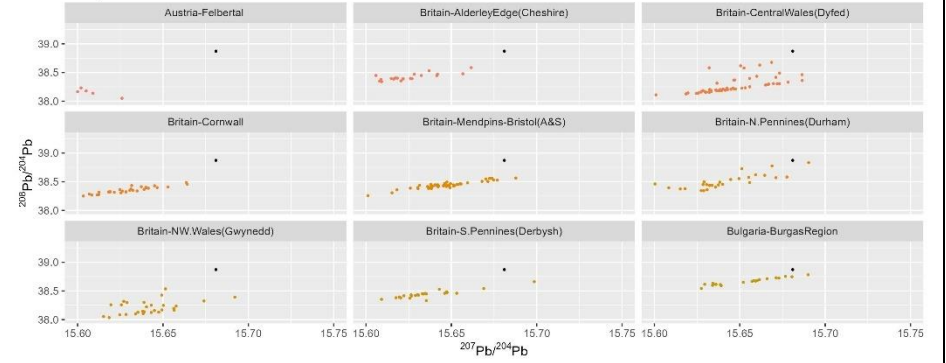

Sample MS003

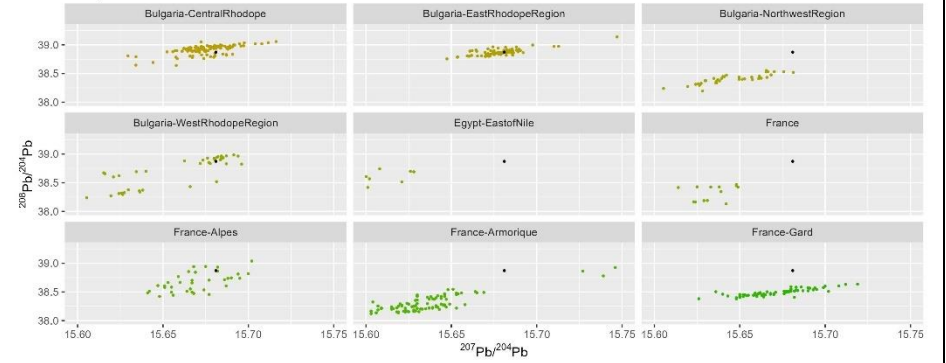

Sample MS003

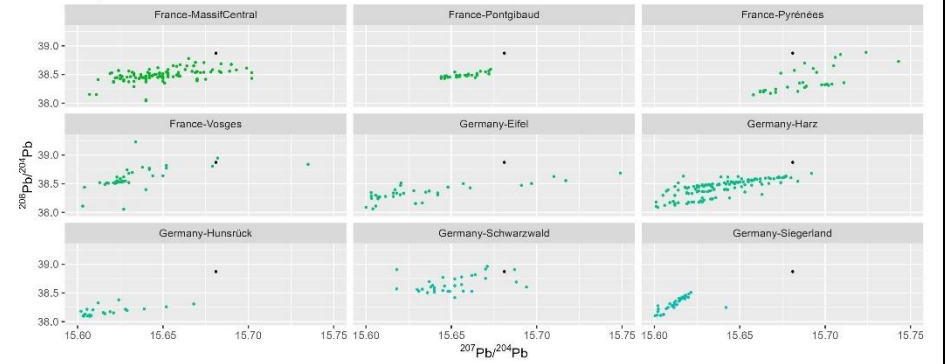

Sample MS003

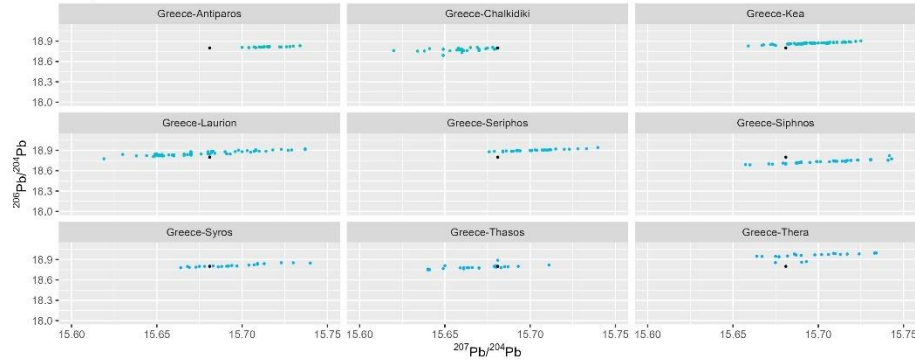

Sample MS003

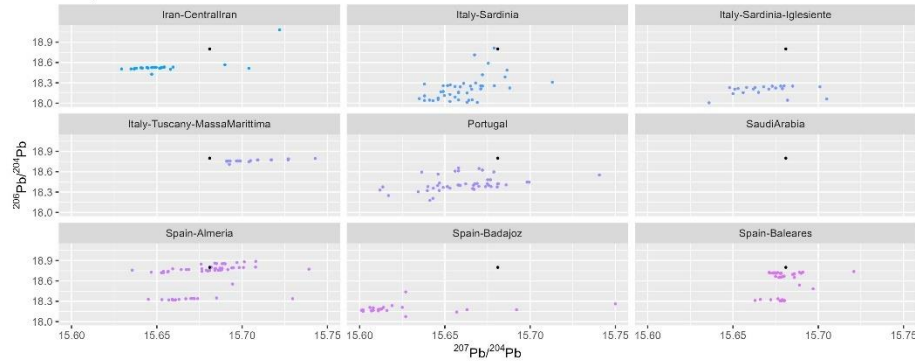

Sample MS003

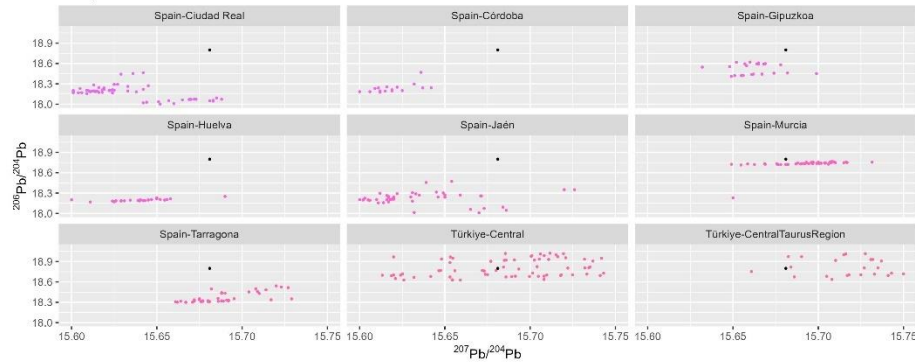

Sample MS003

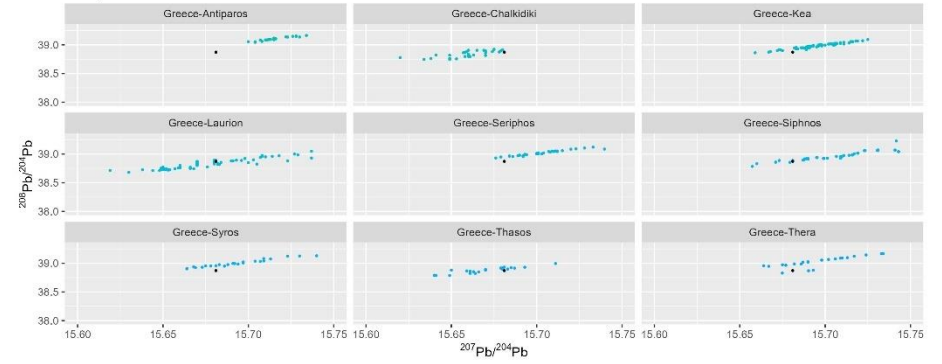

Sample MS003

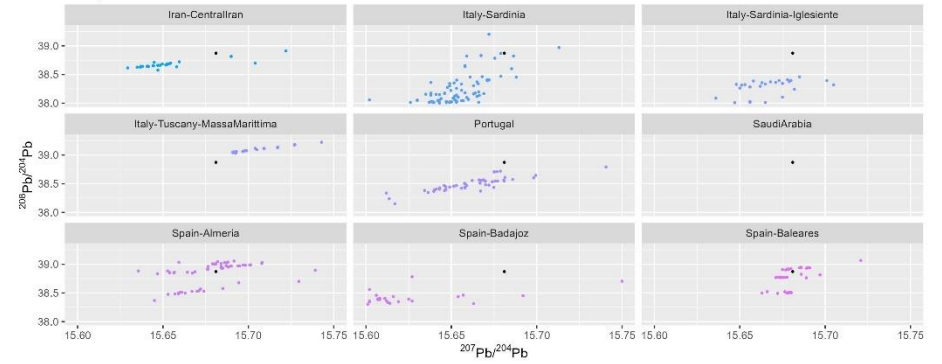

Sample MS003

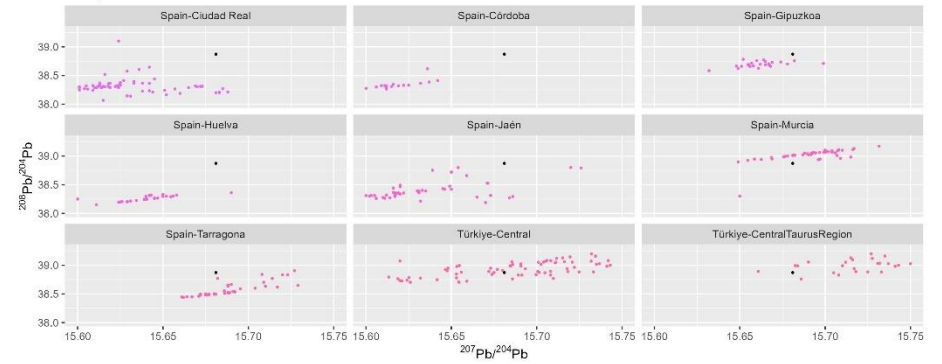



Sample MS003

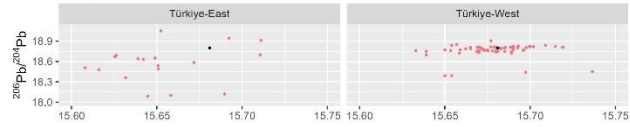

Sample MS003

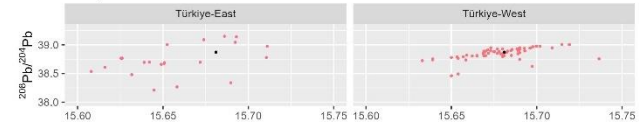

Sample MS004

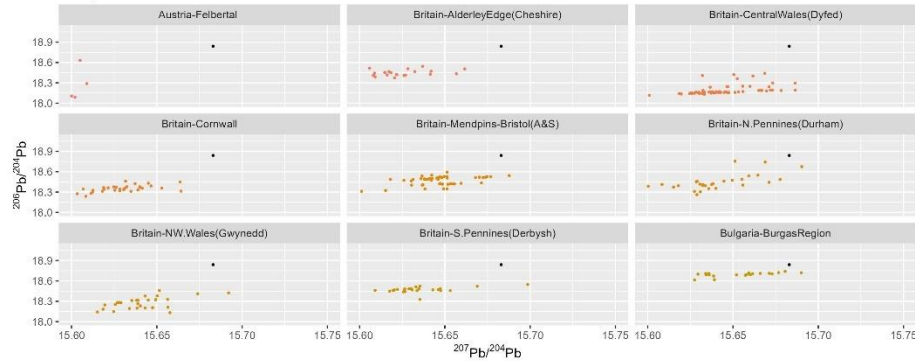

Sample MS004

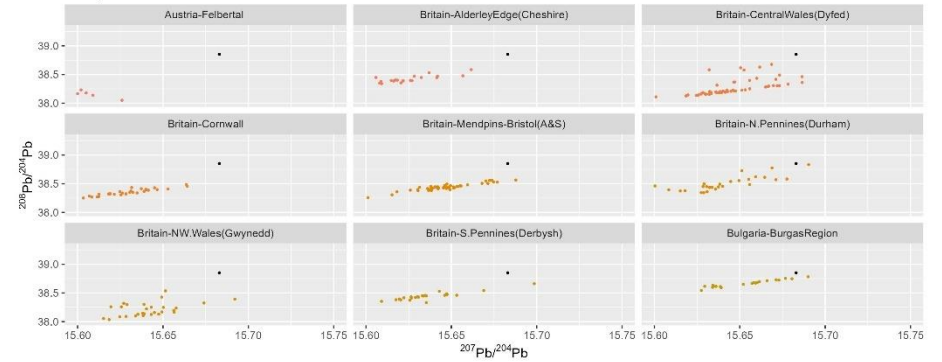

Sample MS004

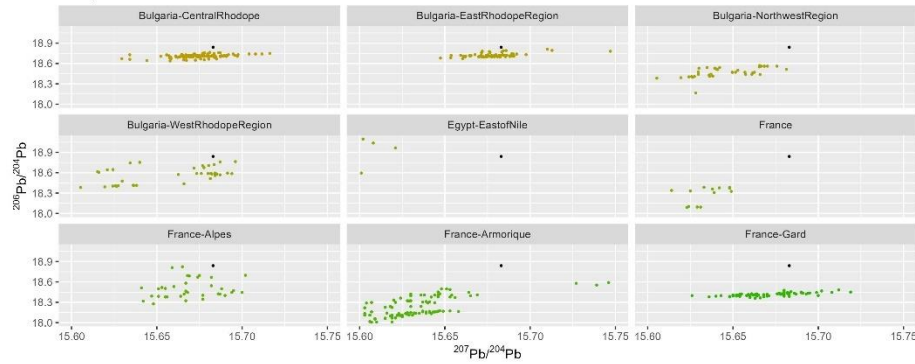

Sample MS004

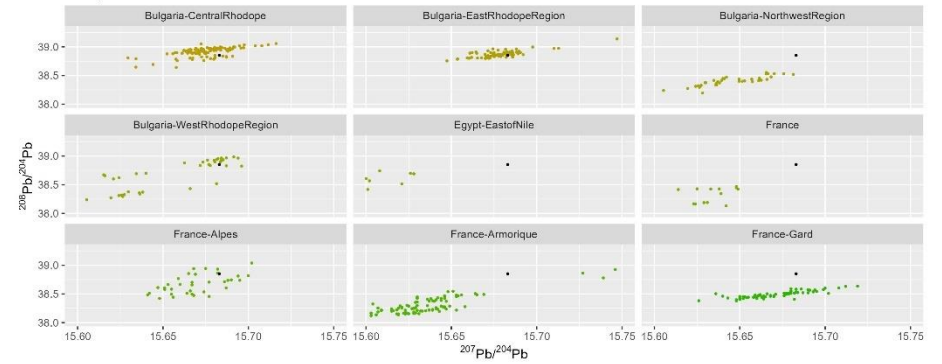

Sample MS004

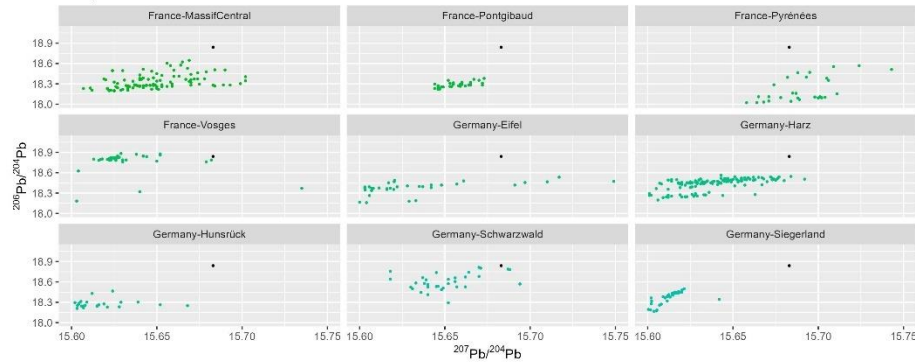

Sample MS004

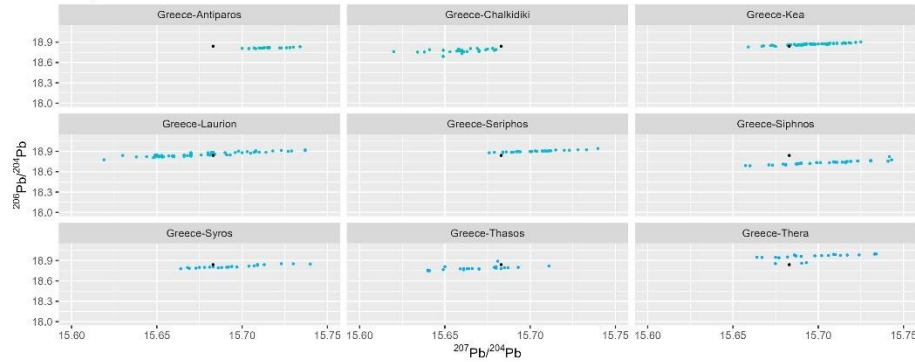

Sample MS004

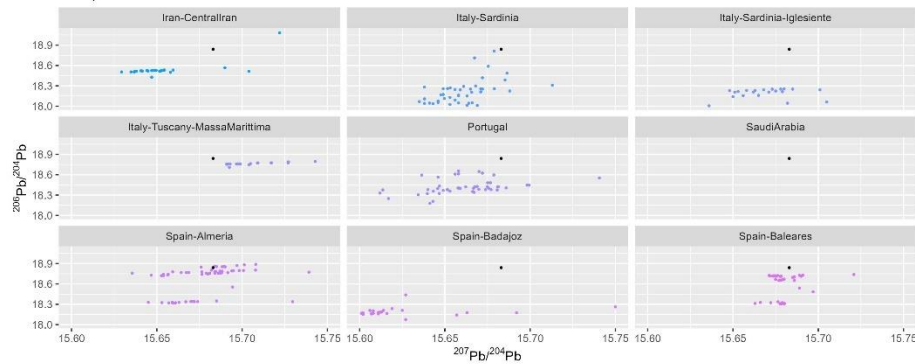

Sample MS004

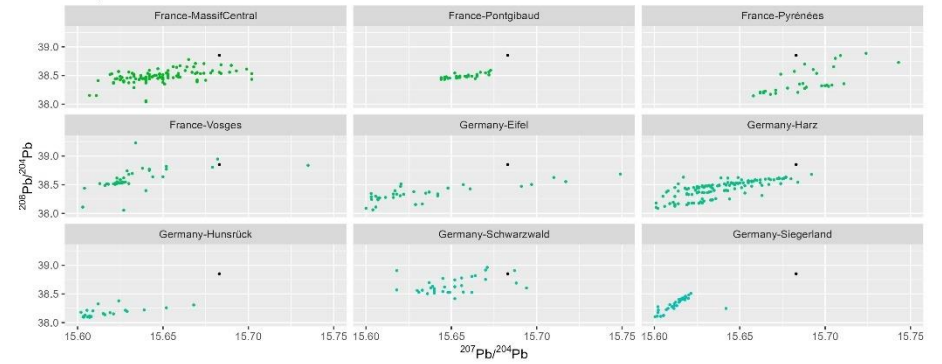

Sample MS004

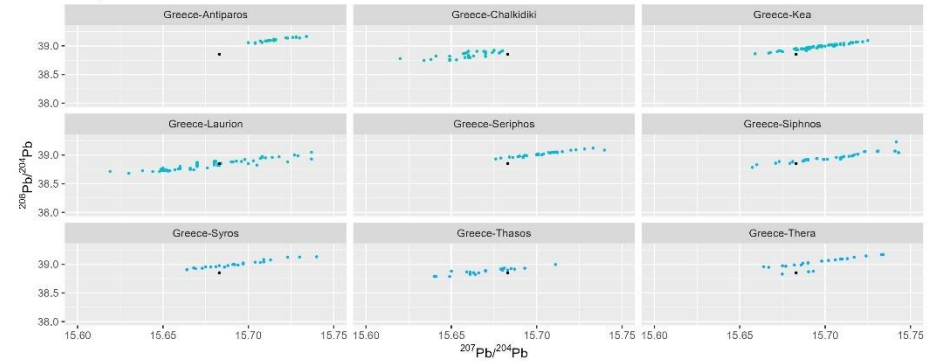

Sample MS004

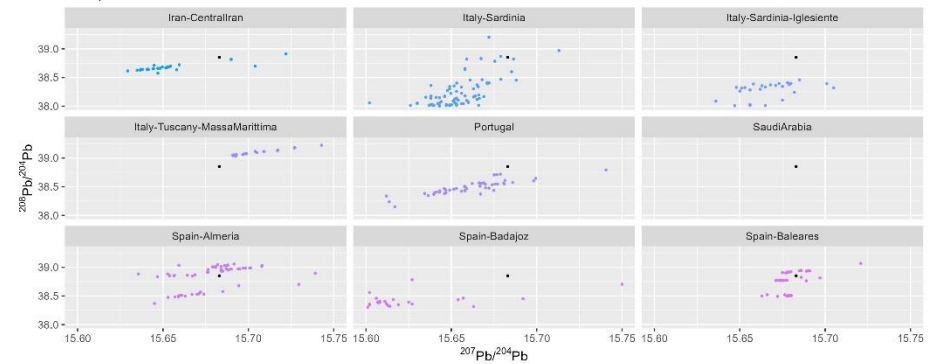



Sample MS004

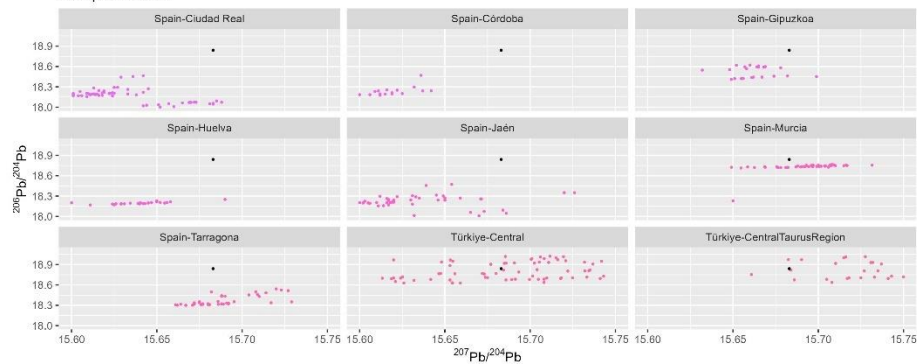

Sample MS004

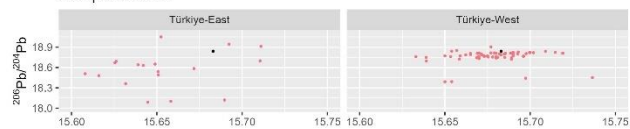

Sample MS004

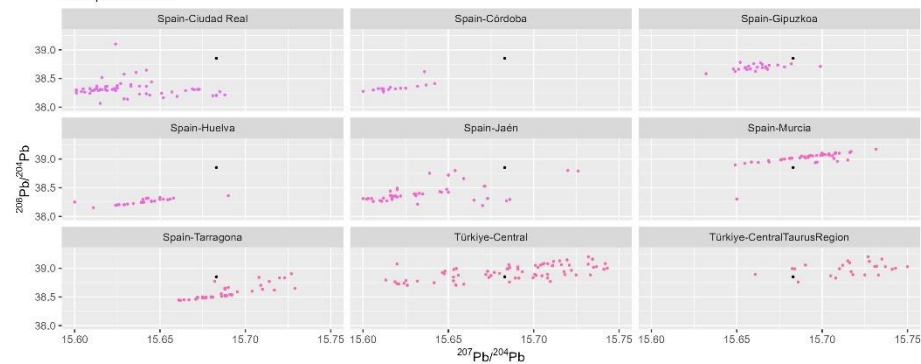

Sample MS004

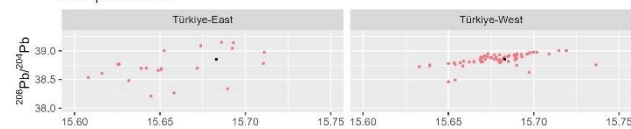

207Pb/204Pb

Sample MS005

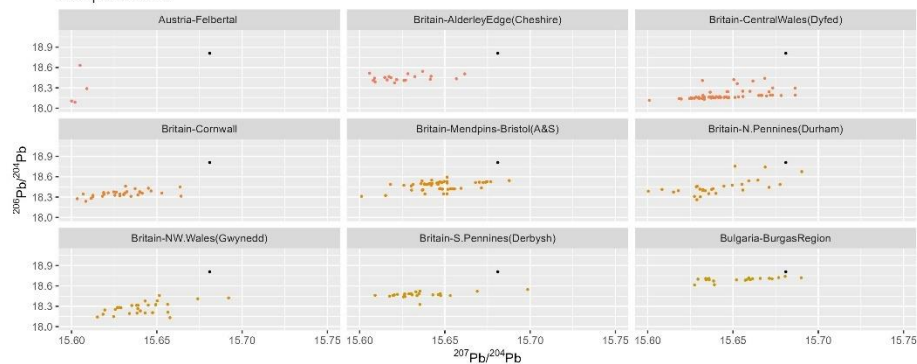

207Pb/204Pb

Sample MS005

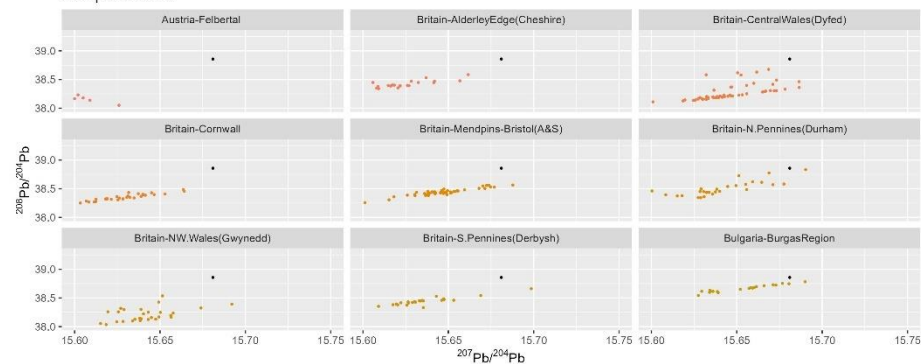

Sample MS005

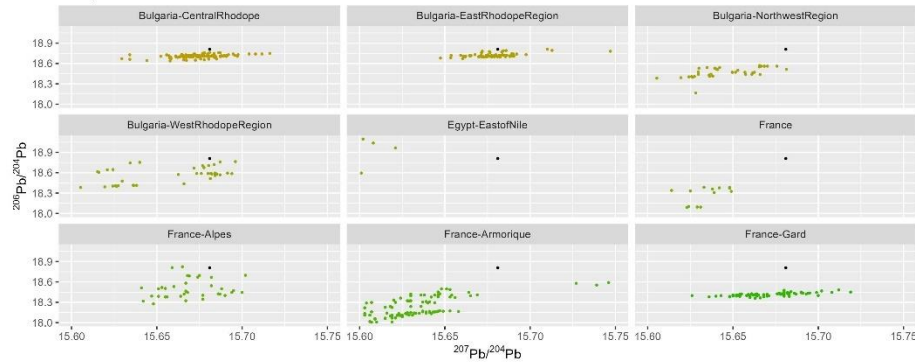

Sample MS005

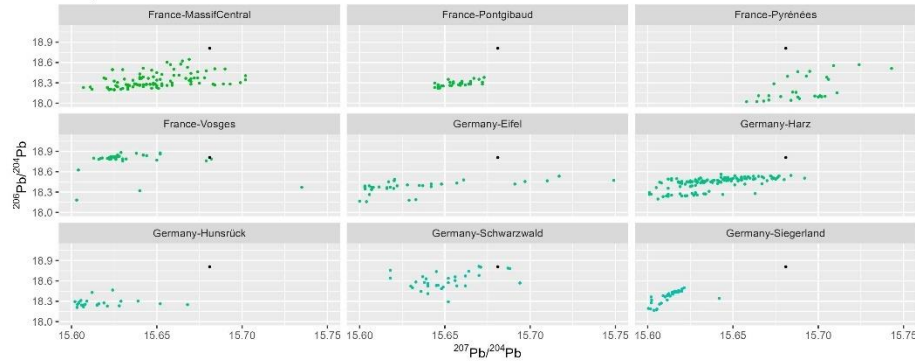

Sample MS005

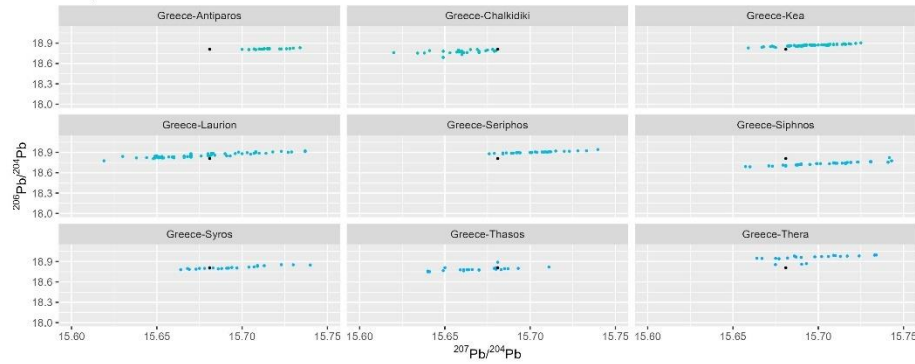

Sample MS005

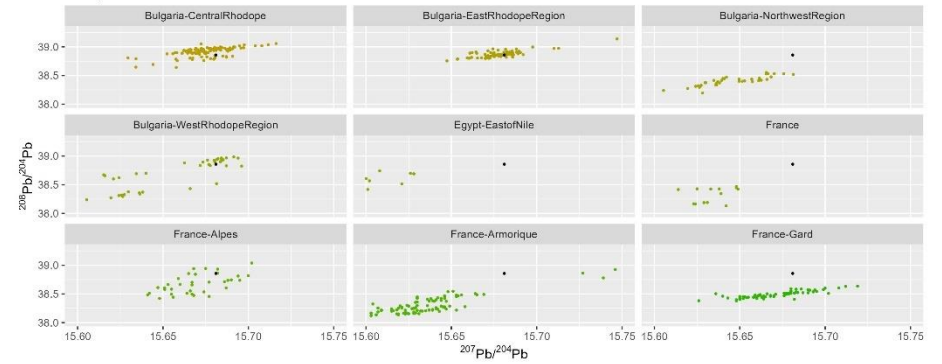

Sample MS005

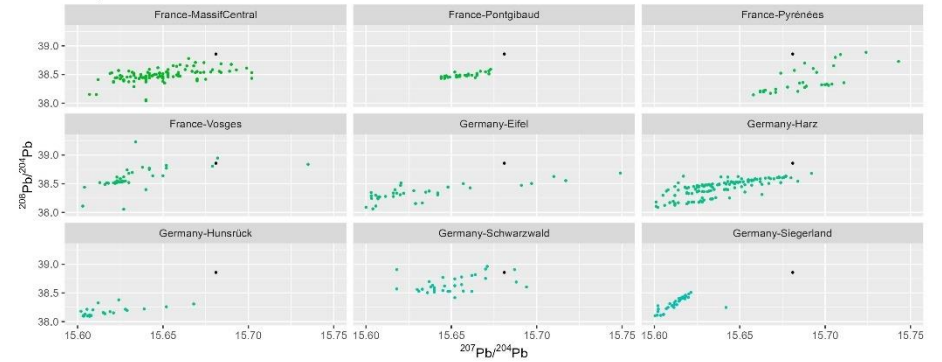

Sample MS005

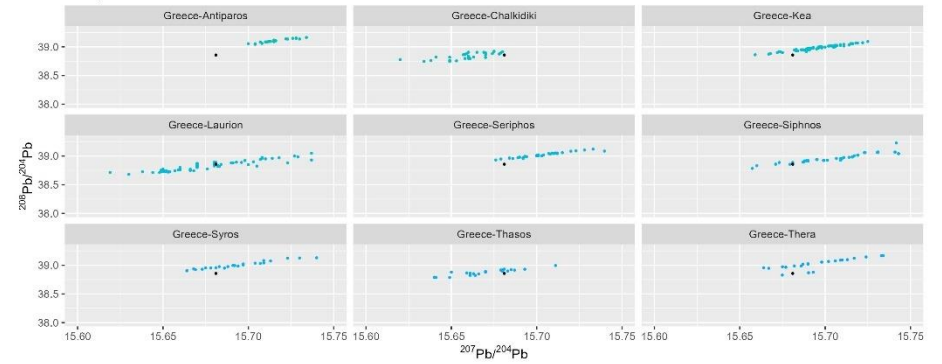

Sample MS005

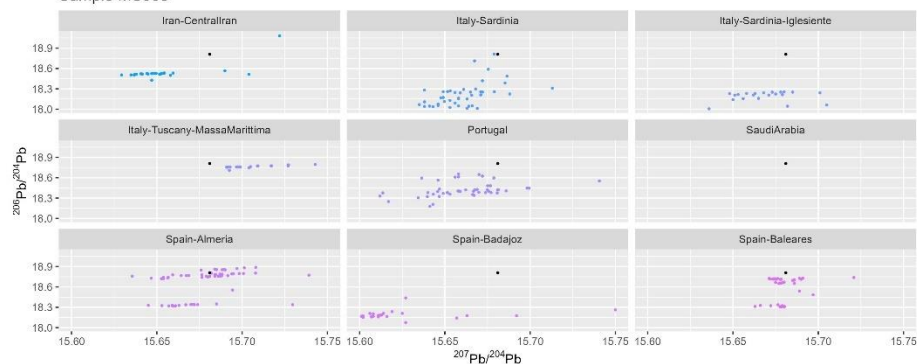

Sample MS005

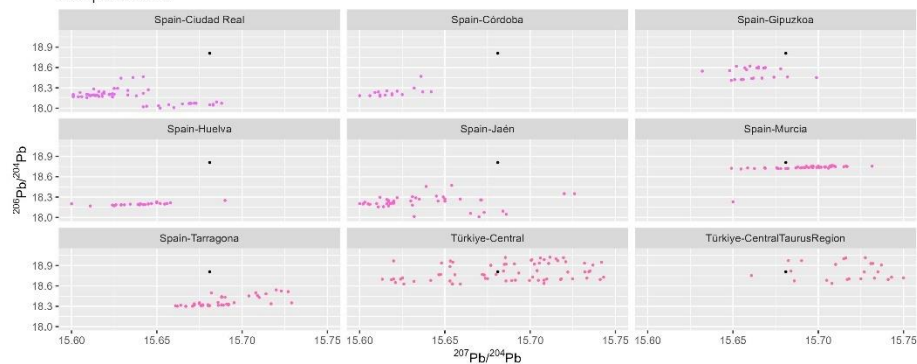

Sample MS005

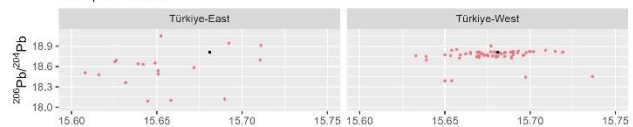 $^{207}\text{Pb}/^{204}\text{Pb}$ 

Sample MS005

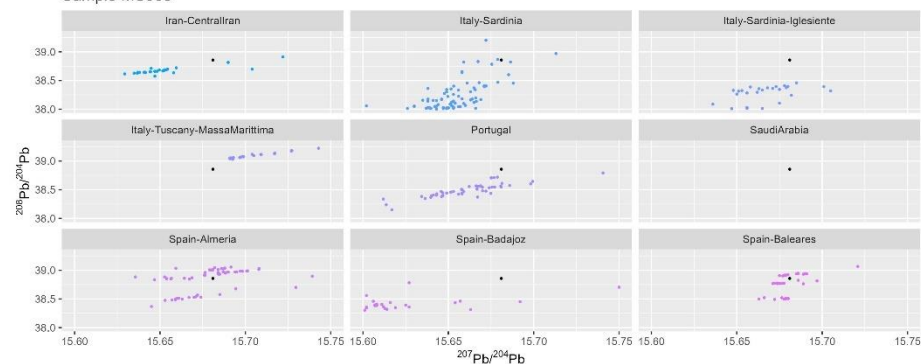

Sample MS005

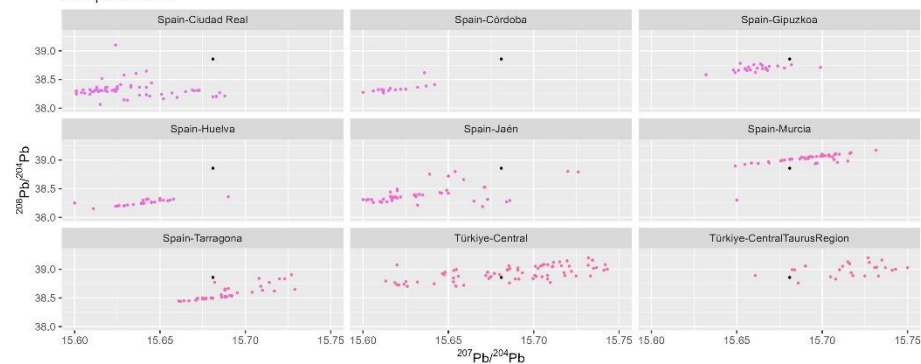

Sample MS005

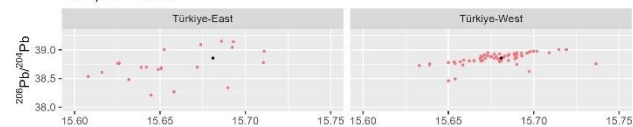 $^{207}\text{Pb}/^{204}\text{Pb}$

Sample MS006

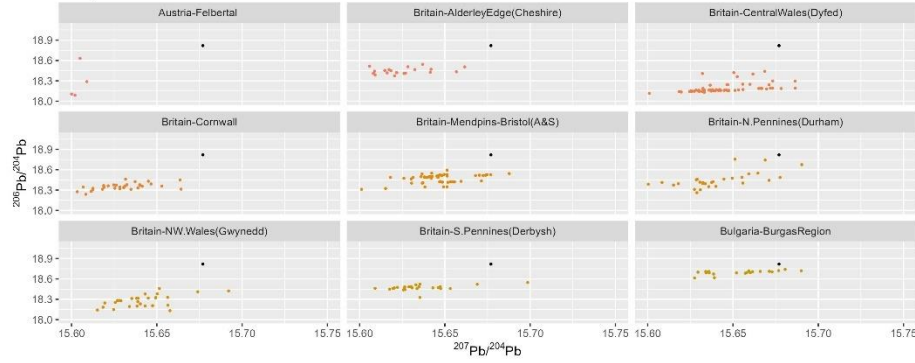

Sample MS006

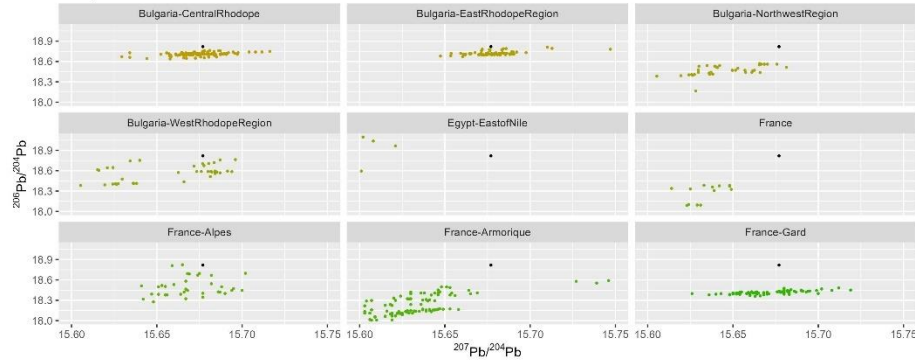

Sample MS006

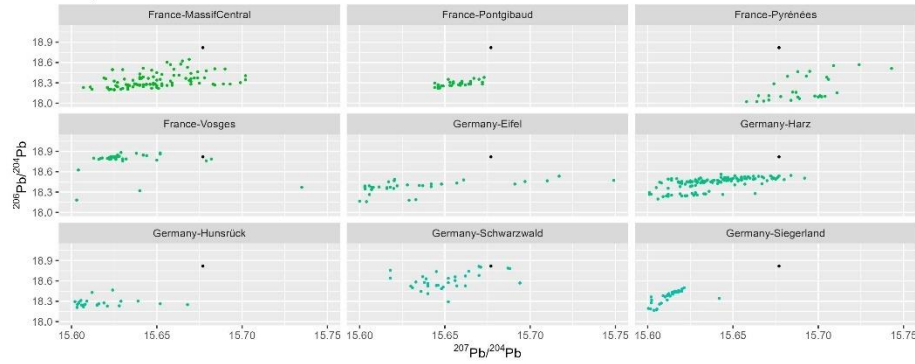

Sample MS006

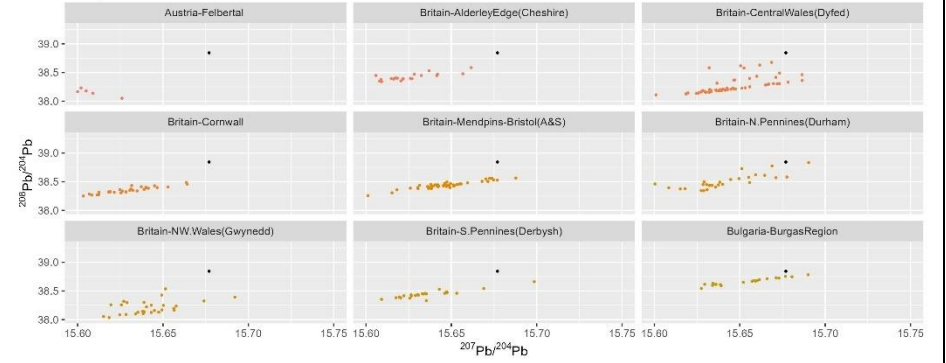

Sample MS006

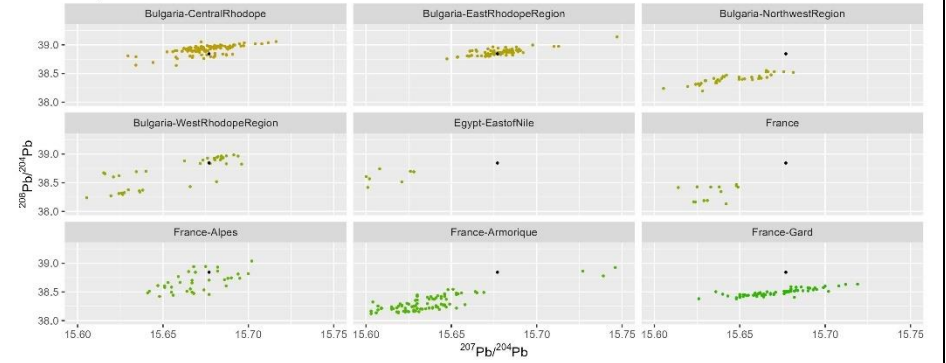

Sample MS006

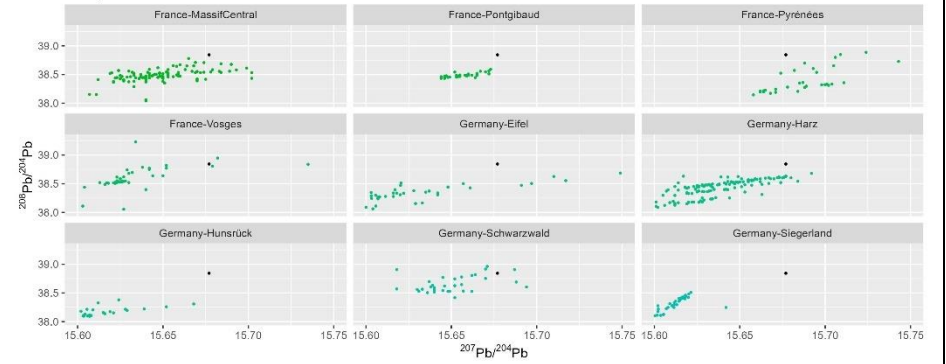



Sample MS006

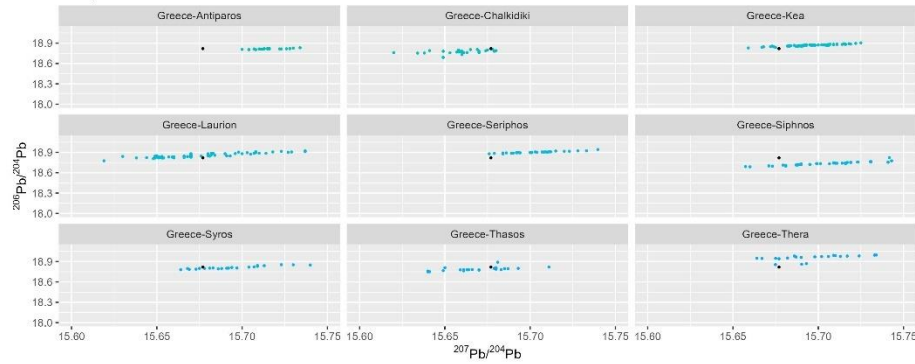

Sample MS006

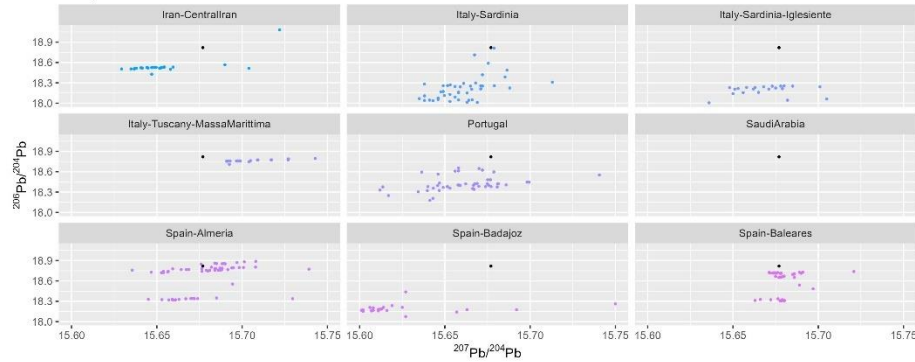

Sample MS006

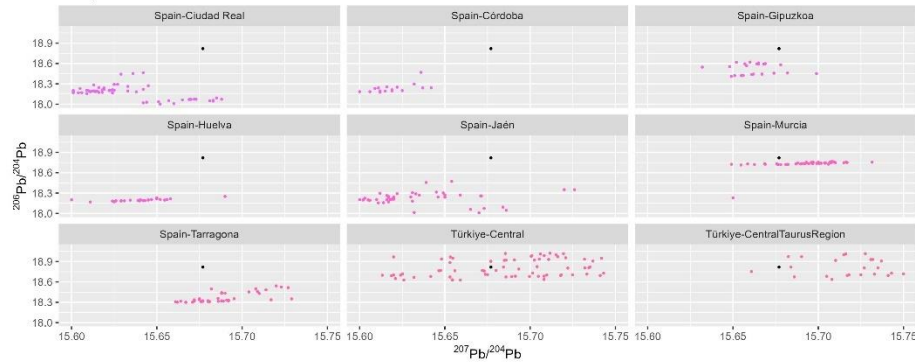

Sample MS006

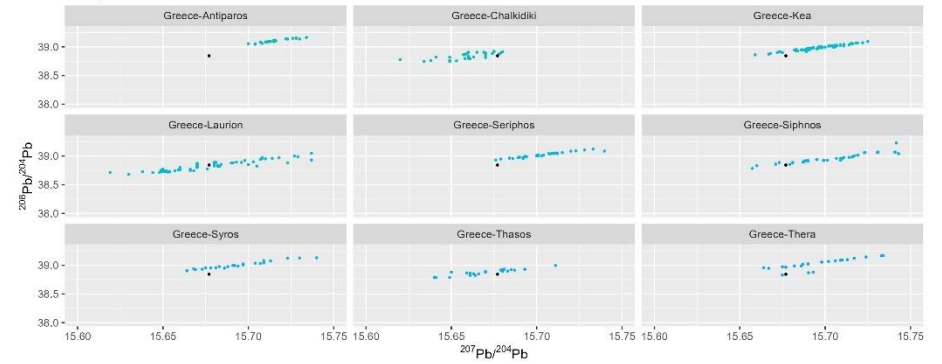

Sample MS006

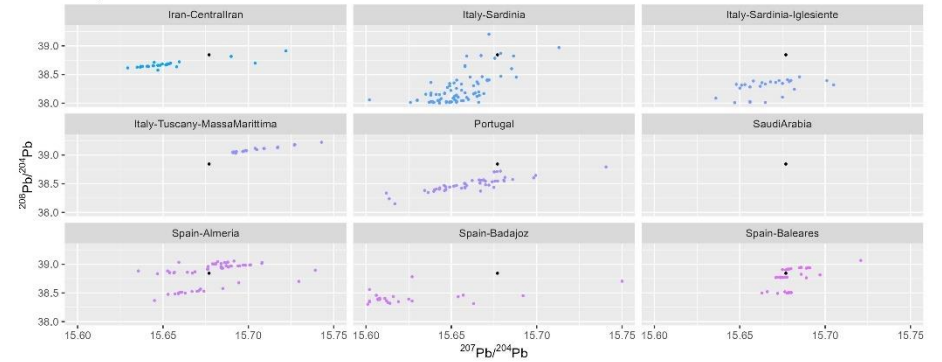

Sample MS006

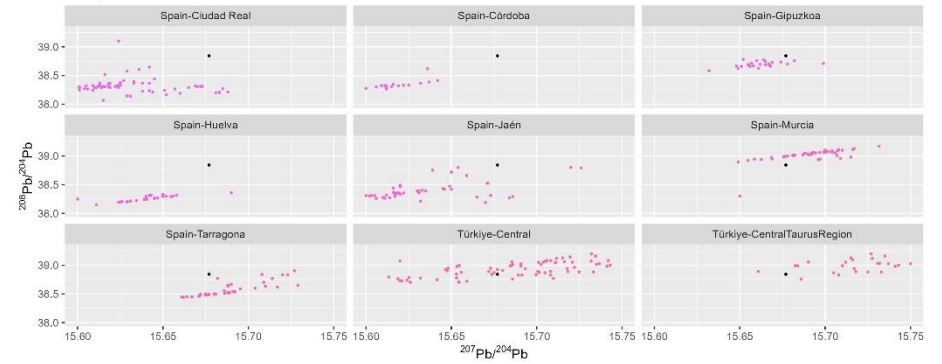

Sample MS006

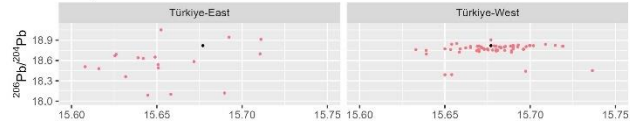

Sample MS006

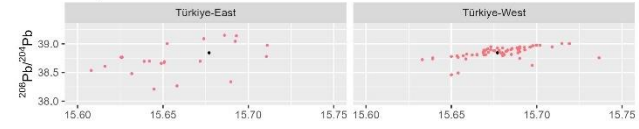

Sample MS007

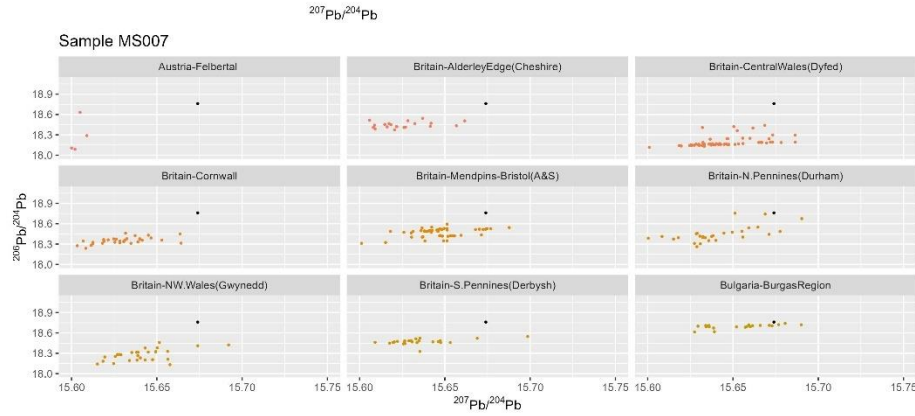

Sample MS007

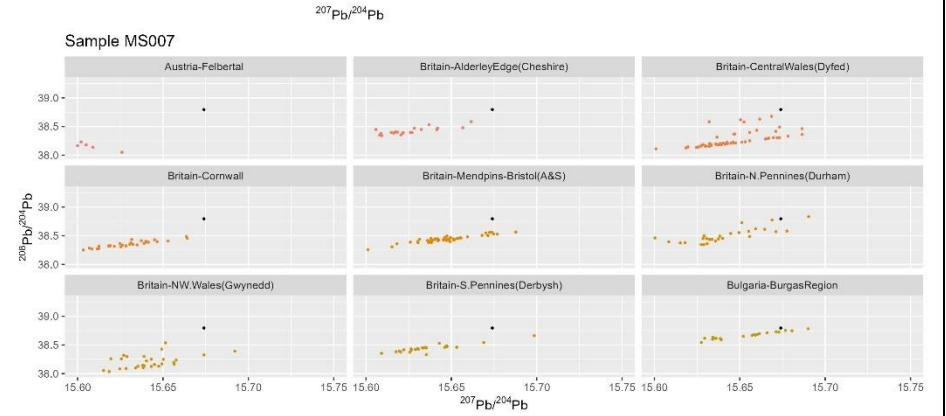

Sample MS007

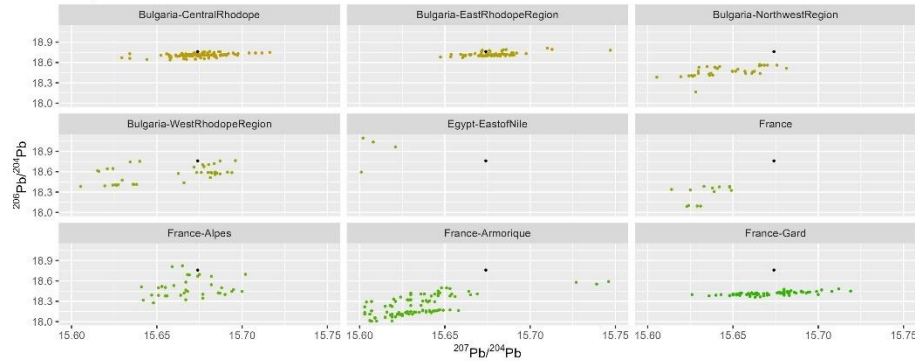

Sample MS007

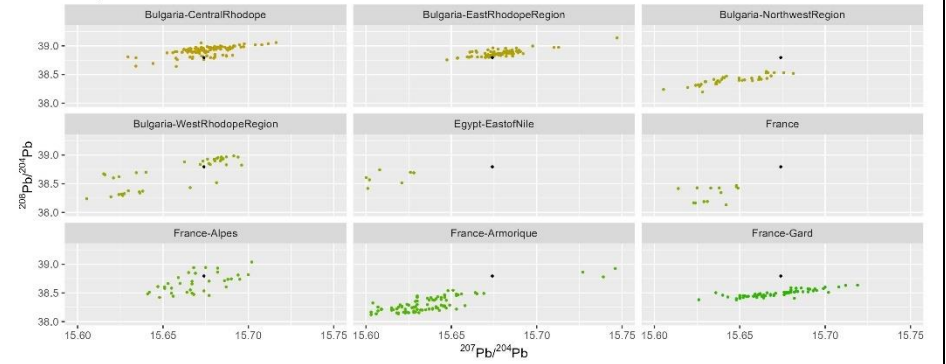



Sample MS007

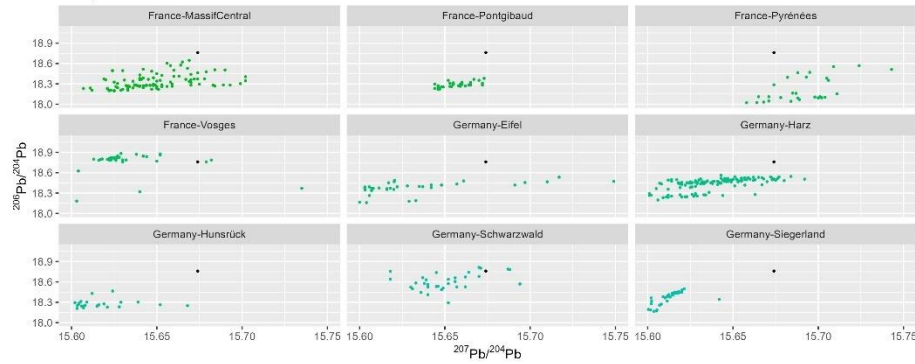

Sample MS007

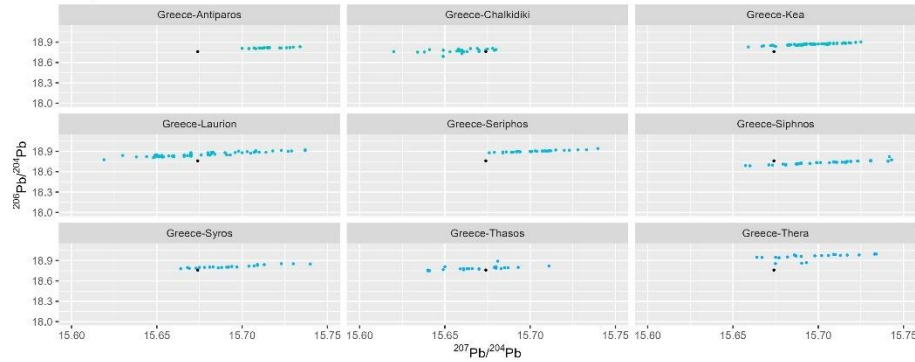

Sample MS007

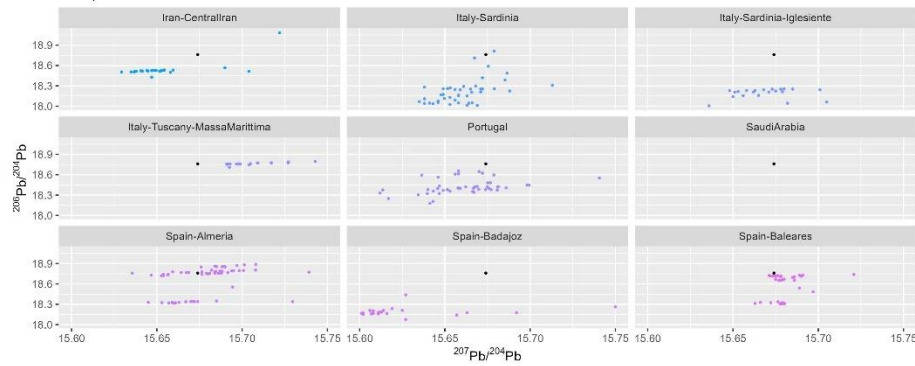

Sample MS007

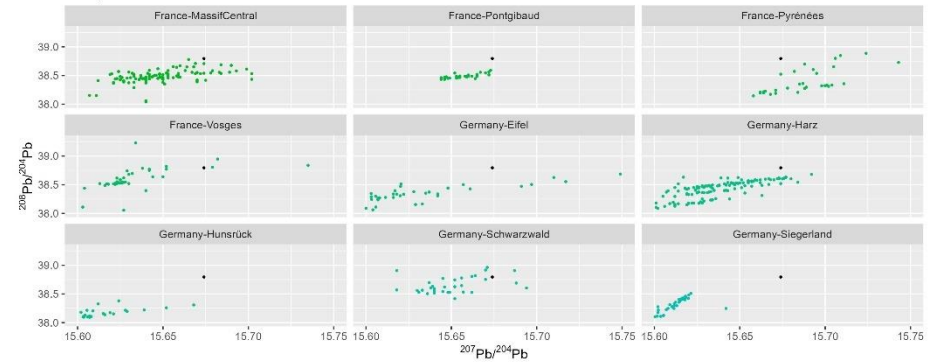

Sample MS007

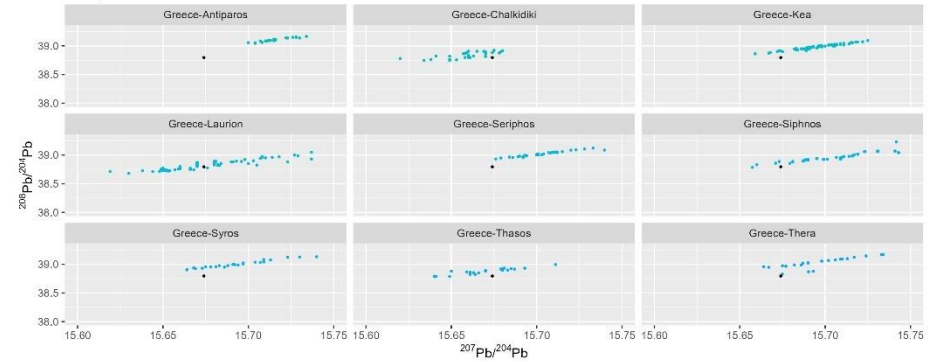

Sample MS007

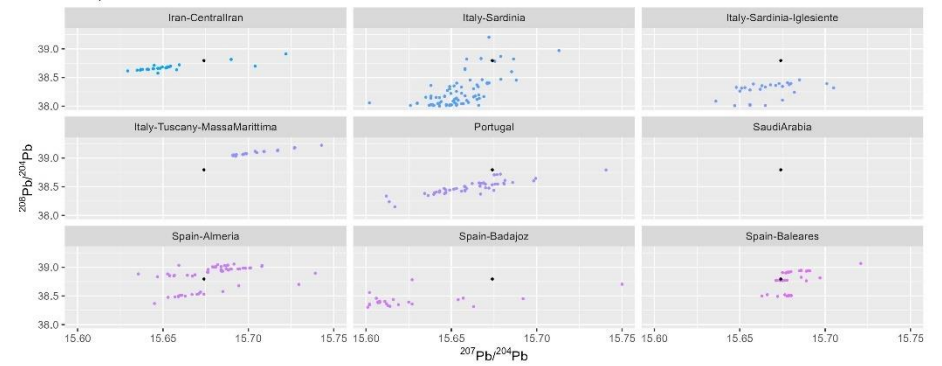

Sample MS007

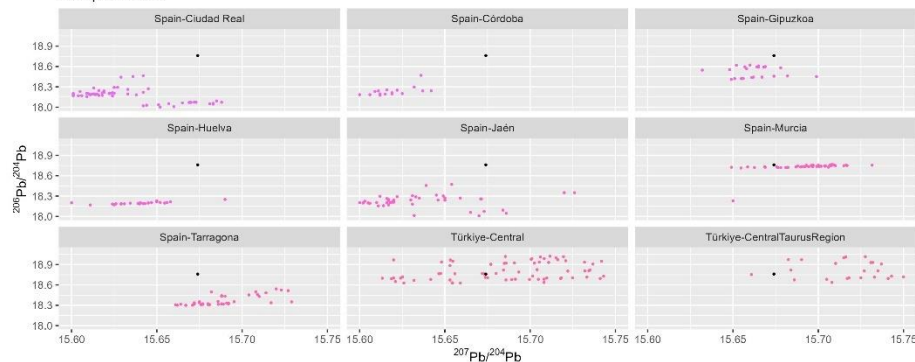

Sample MS007

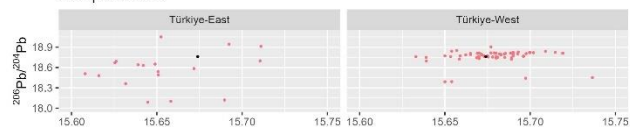

Sample MS007

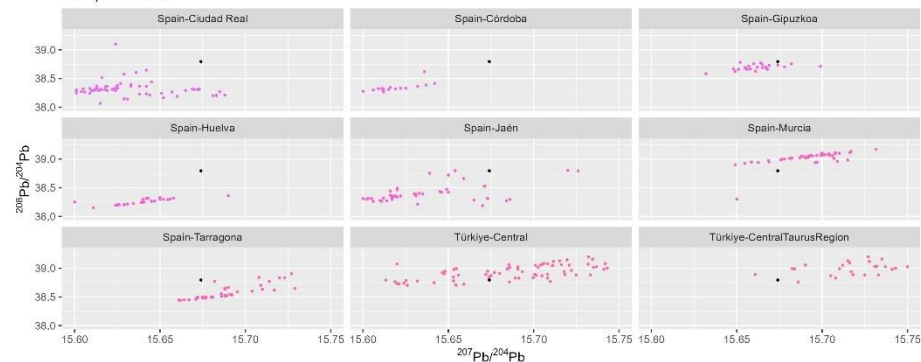

Sample MS007

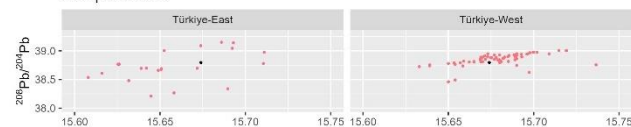

$^{207}\text{Pb}/^{204}\text{Pb}$

Sample MS008

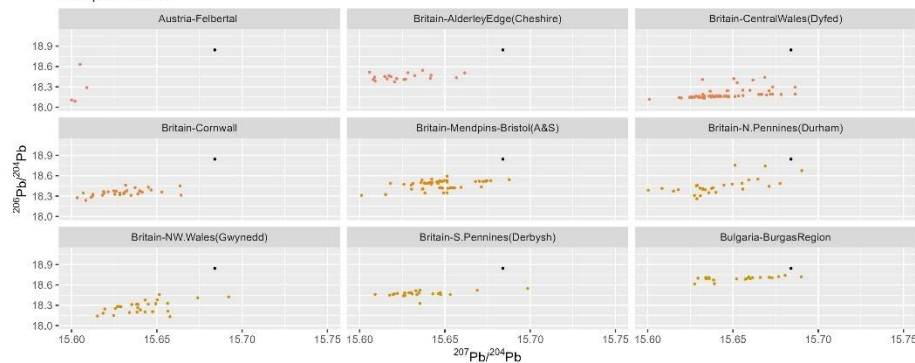

$^{207}\text{Pb}/^{204}\text{Pb}$

Sample MS008

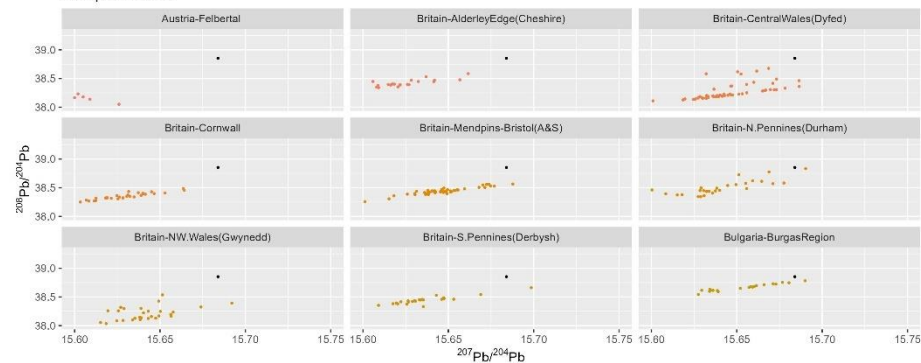

Sample MS008

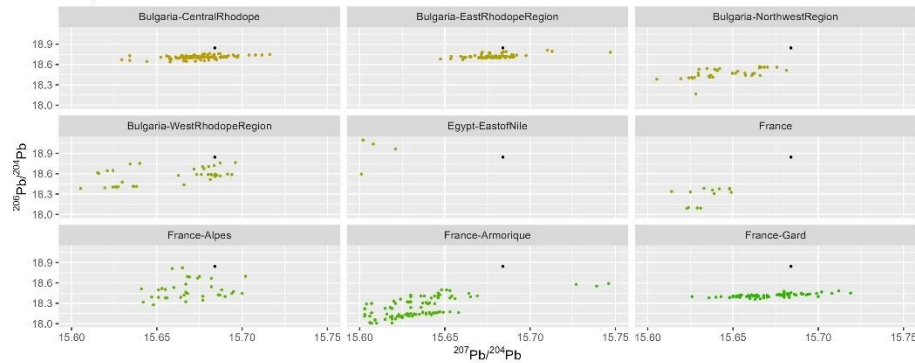

Sample MS008

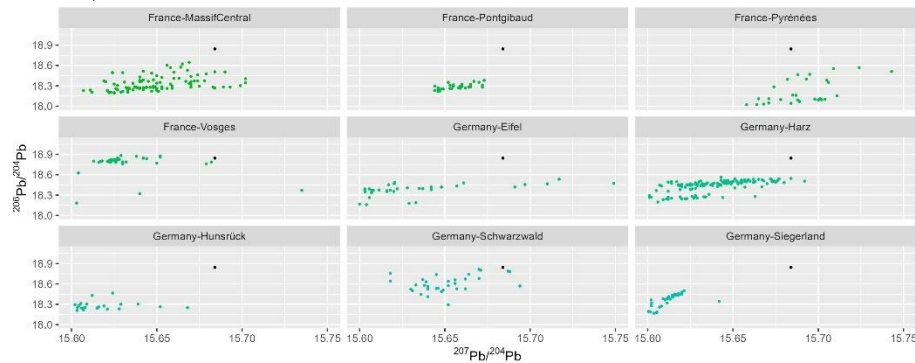

Sample MS008

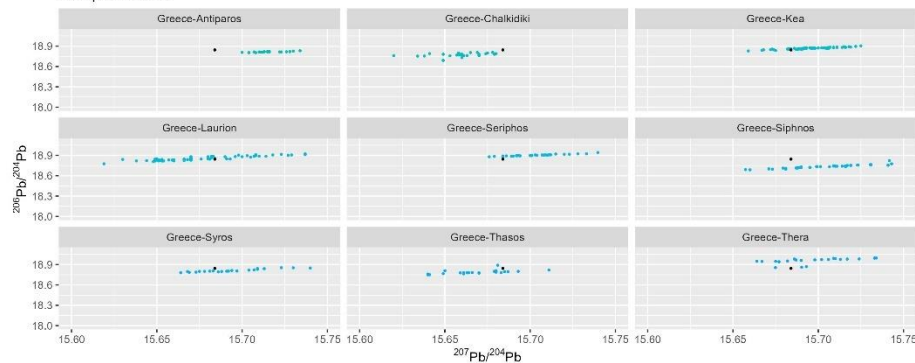

Sample MS008

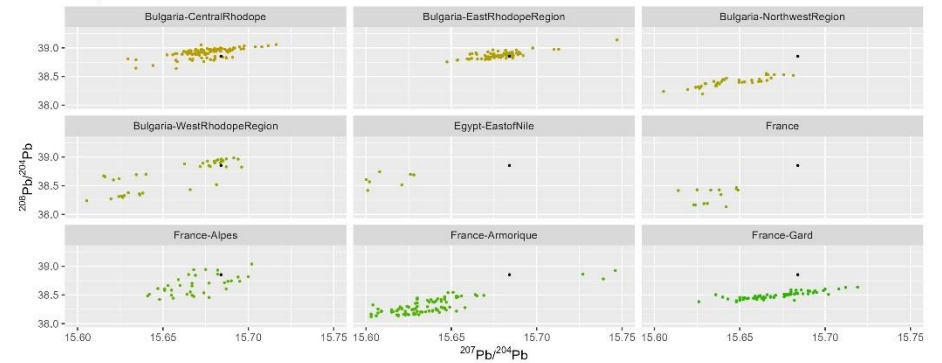

Sample MS008

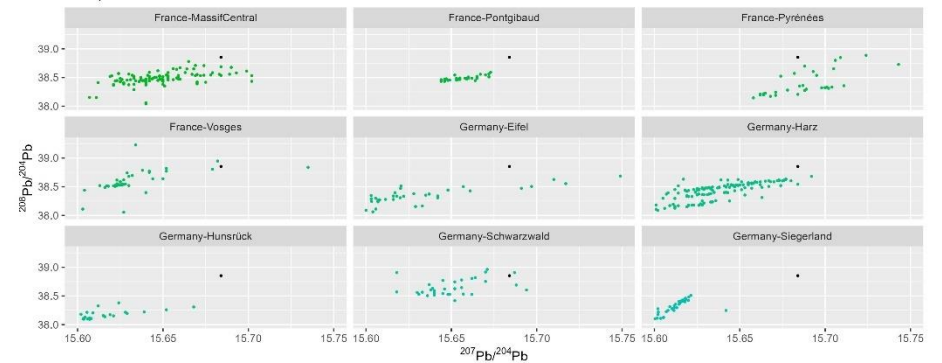

Sample MS008

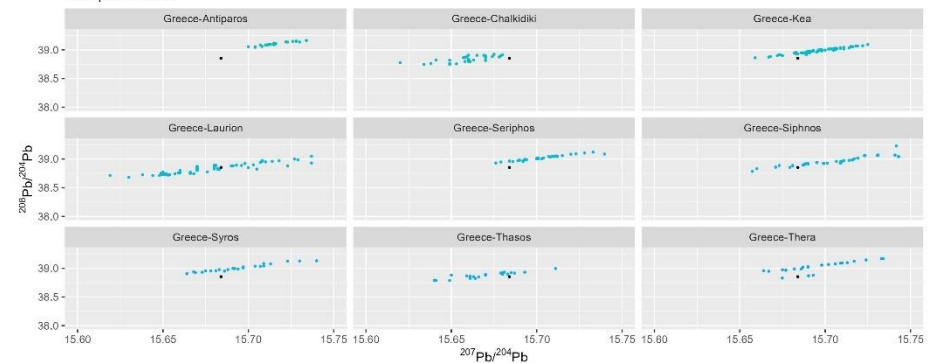

Sample MS008

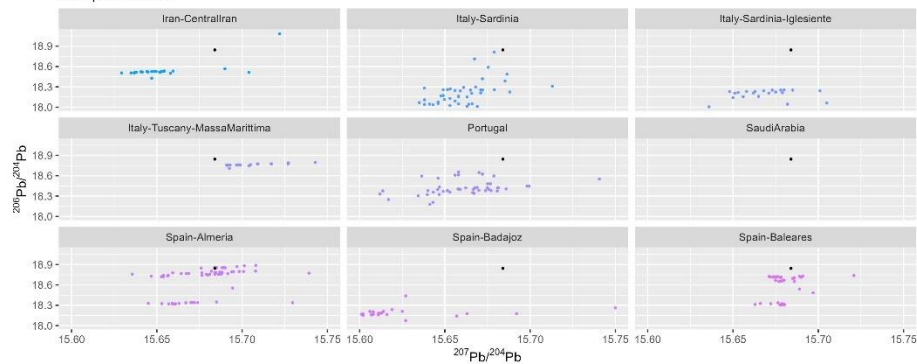

Sample MS008

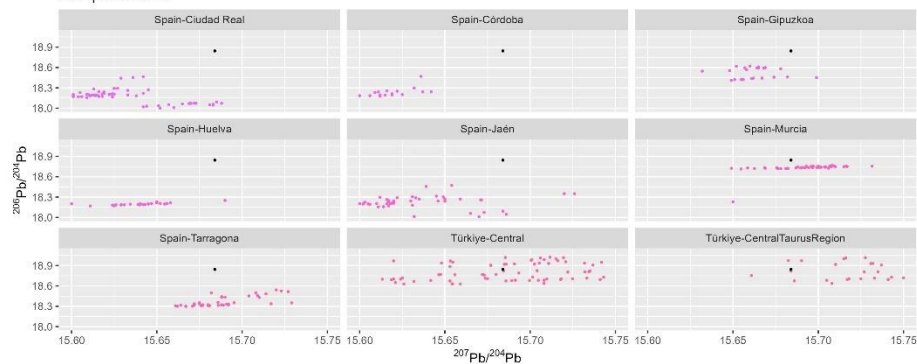

Sample MS008

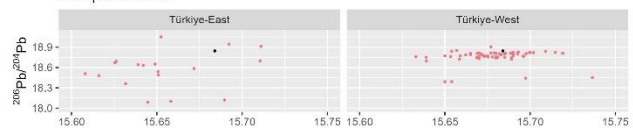

$^{207}\text{Pb}/^{204}\text{Pb}$

Sample MS008

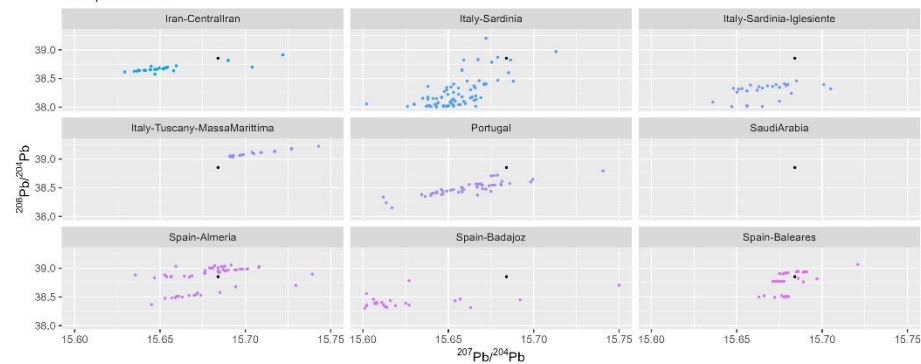

Sample MS008

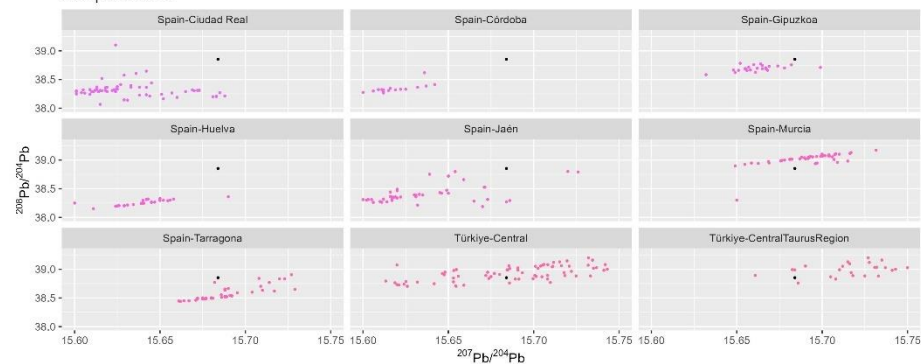

Sample MS008

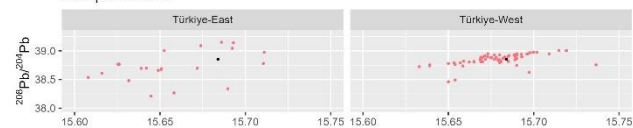

$^{207}\text{Pb}/^{204}\text{Pb}$



Sample MS009

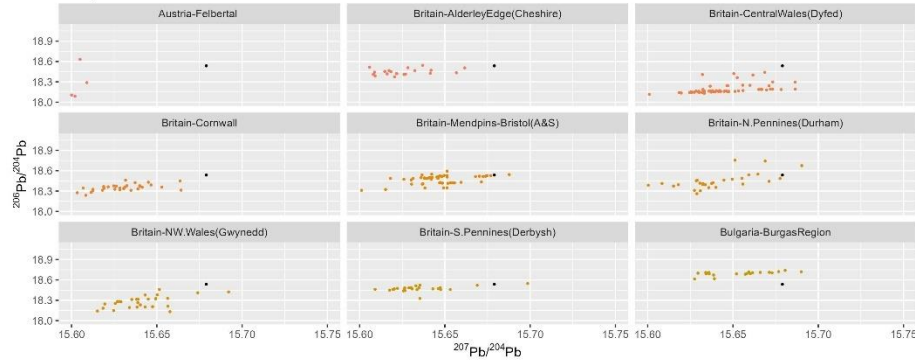

Sample MS009

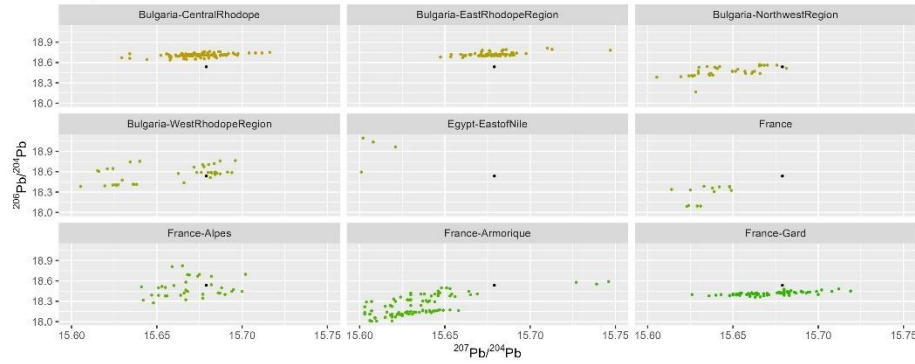

Sample MS009

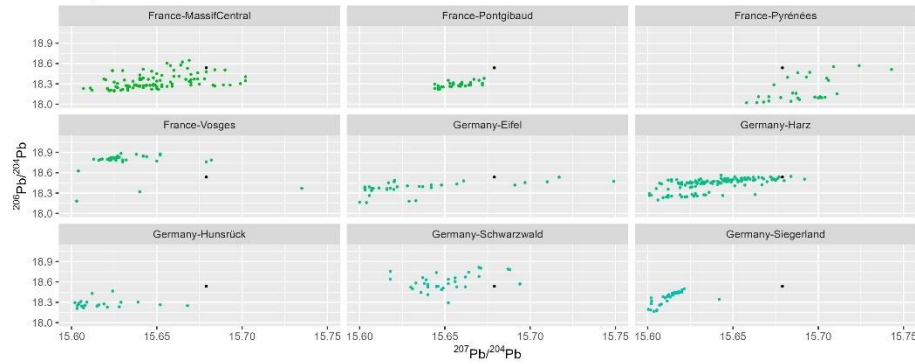

Sample MS009

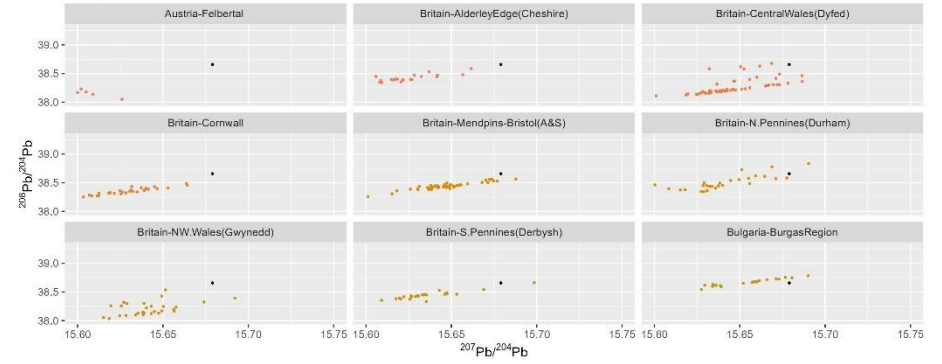

Sample MS009

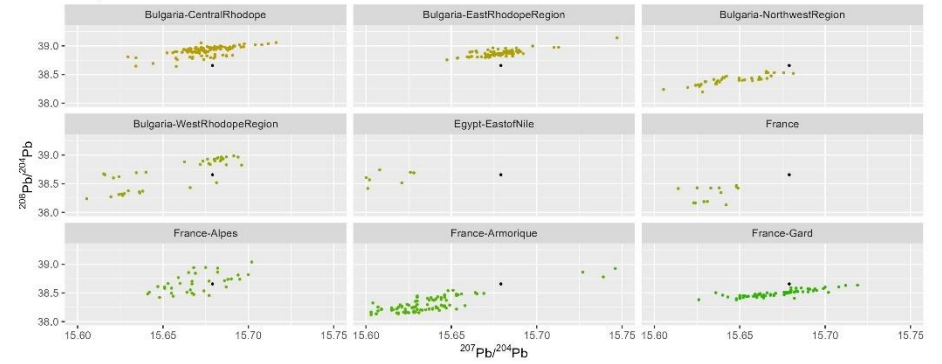

Sample MS009

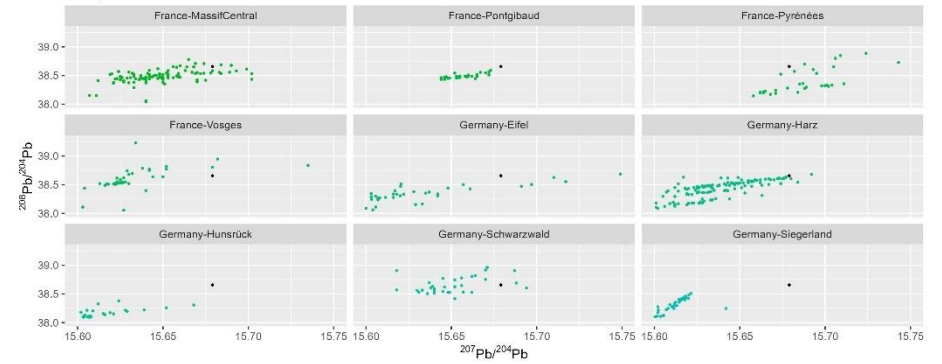

Sample MS009

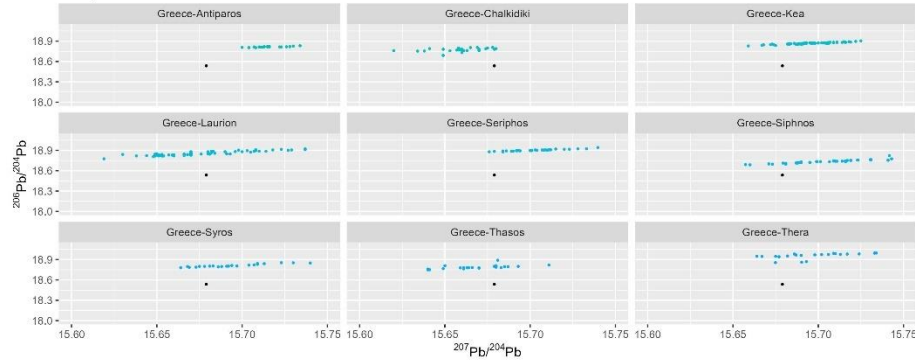

Sample MS009

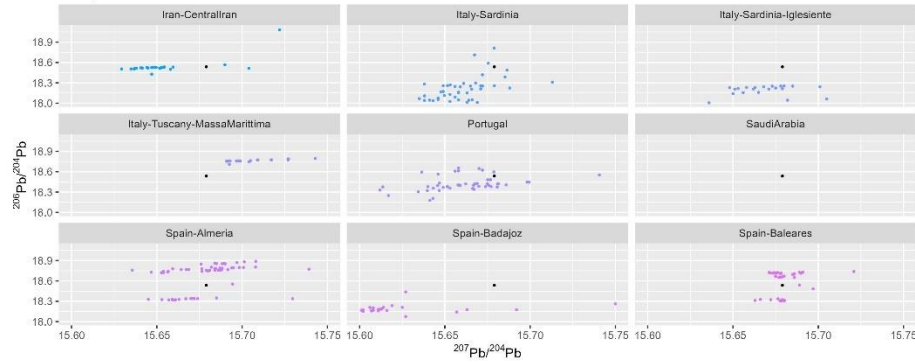

Sample MS009

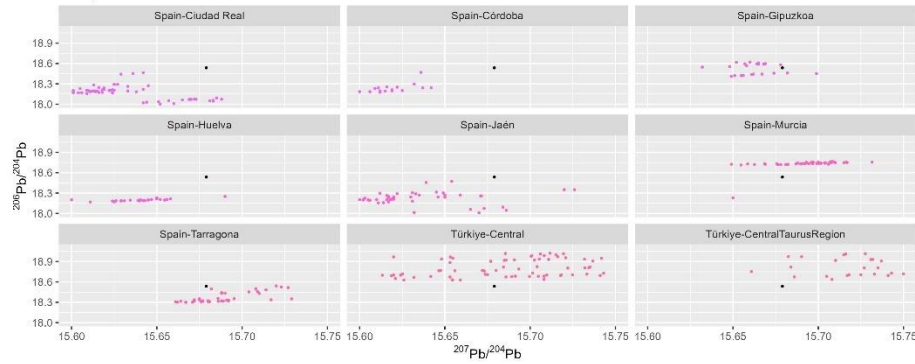

Sample MS009

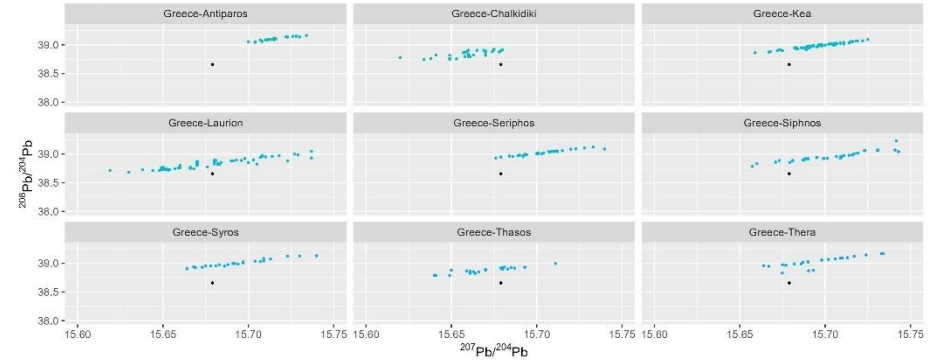

Sample MS009

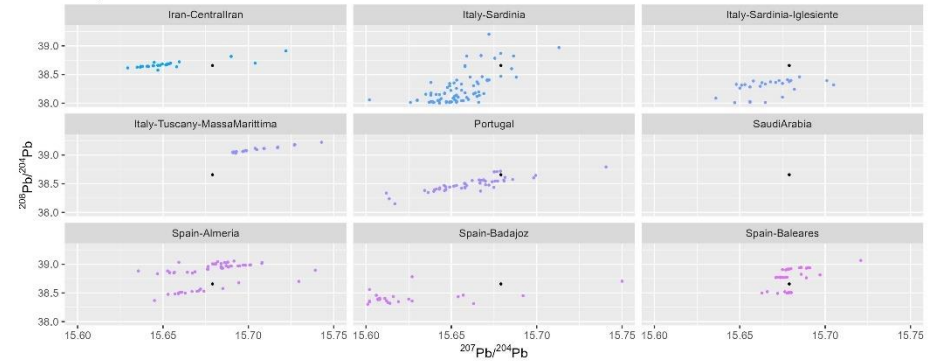

Sample MS009

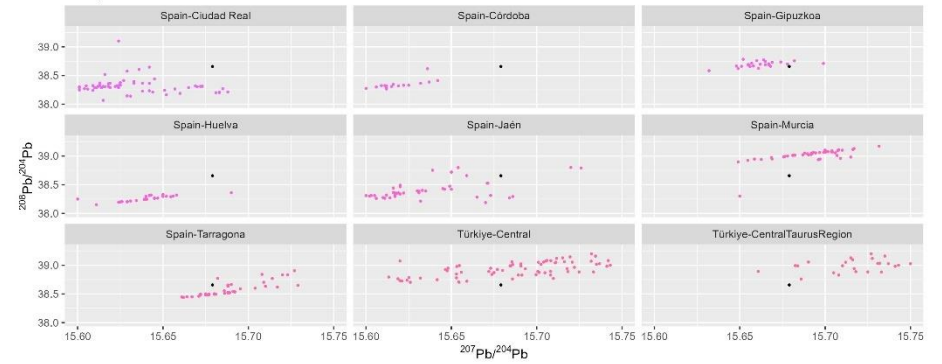



Sample MS009

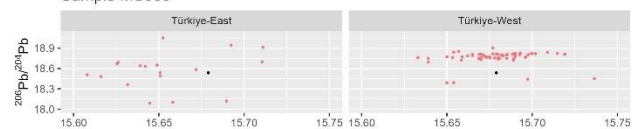 $^{207}\text{Pb}/^{204}\text{Pb}$ 

Sample MS010

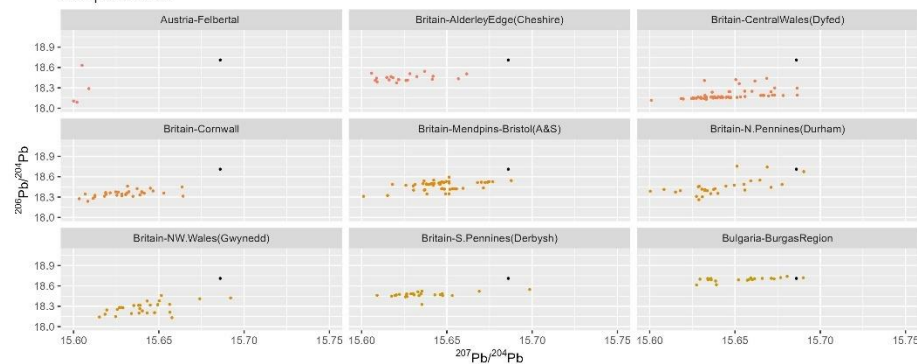 $^{207}\text{Pb}/^{204}\text{Pb}$ 

Sample MS010

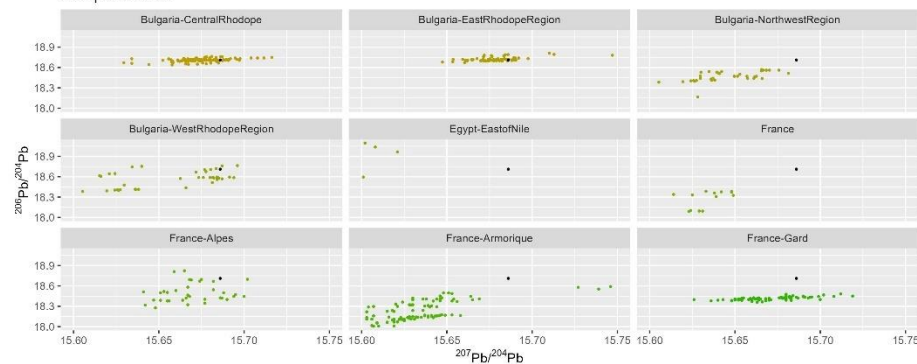 $^{207}\text{Pb}/^{204}\text{Pb}$ 

Sample MS009

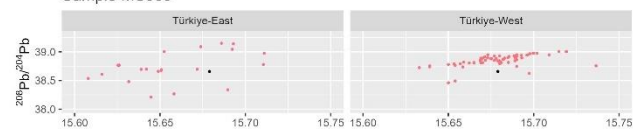 $^{207}\text{Pb}/^{204}\text{Pb}$ 

Sample MS010

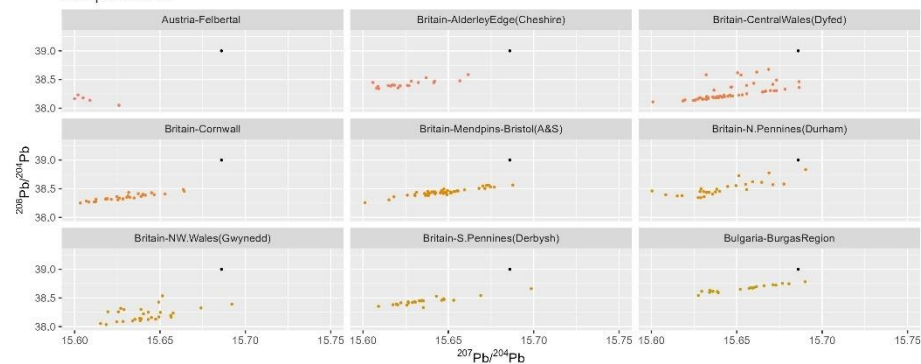 $^{207}\text{Pb}/^{204}\text{Pb}$ 

Sample MS010

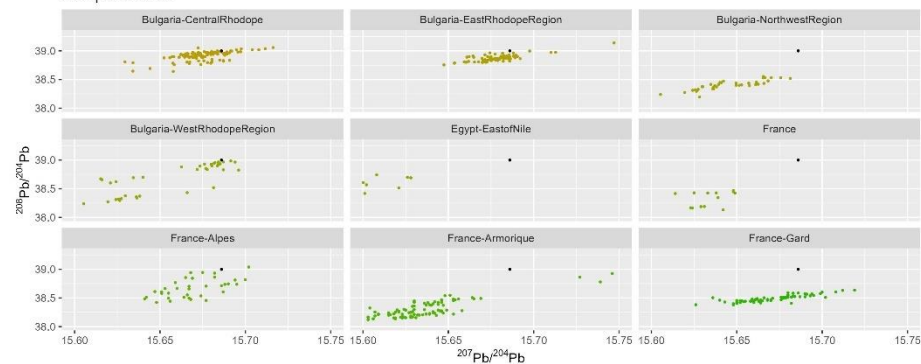 $^{207}\text{Pb}/^{204}\text{Pb}$

Sample MS010

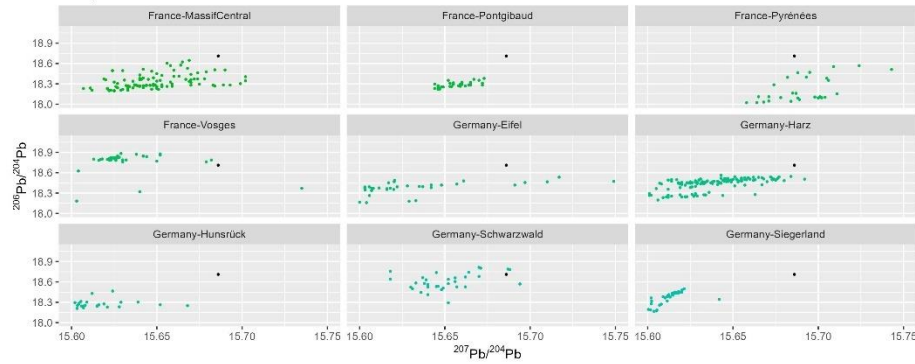

Sample MS010

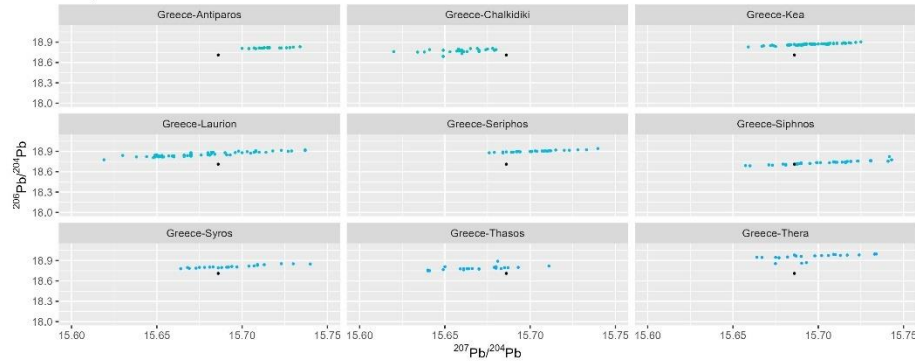

Sample MS010

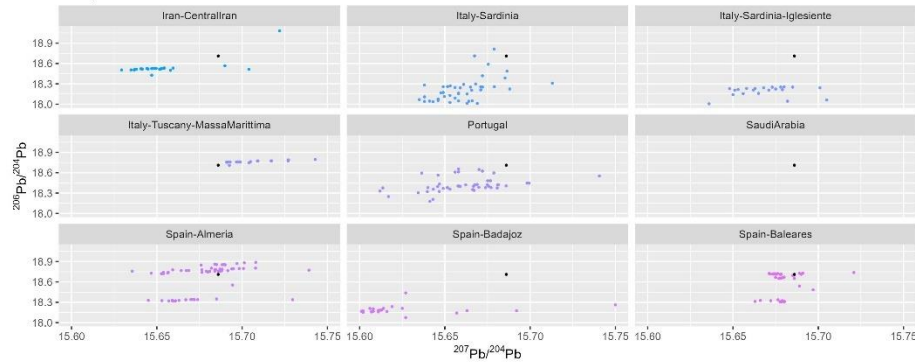

Sample MS010

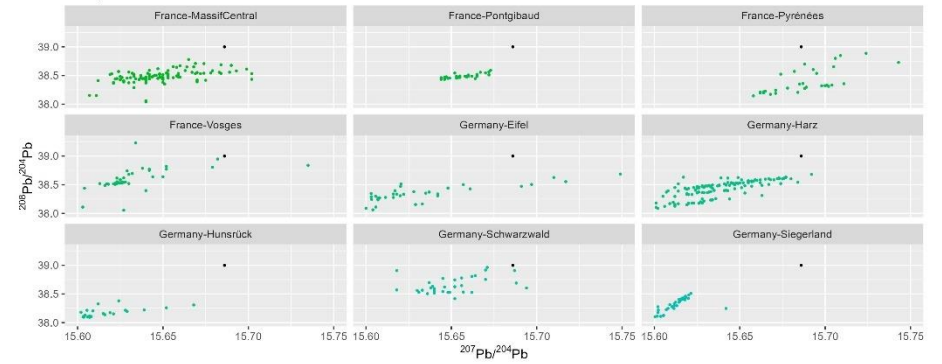

Sample MS010

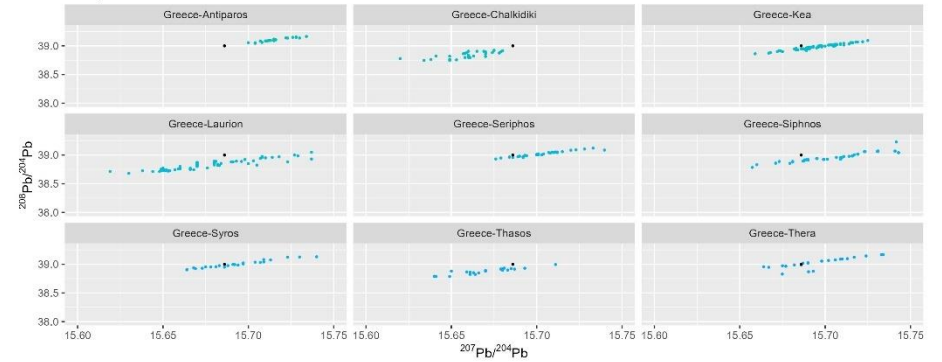

Sample MS010

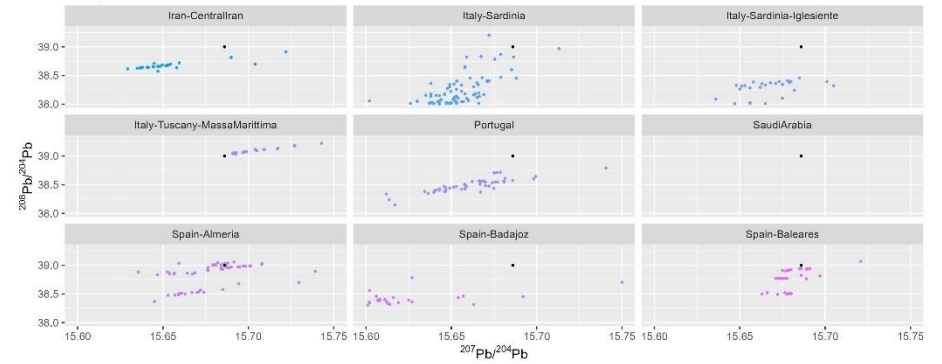

Sample MS010

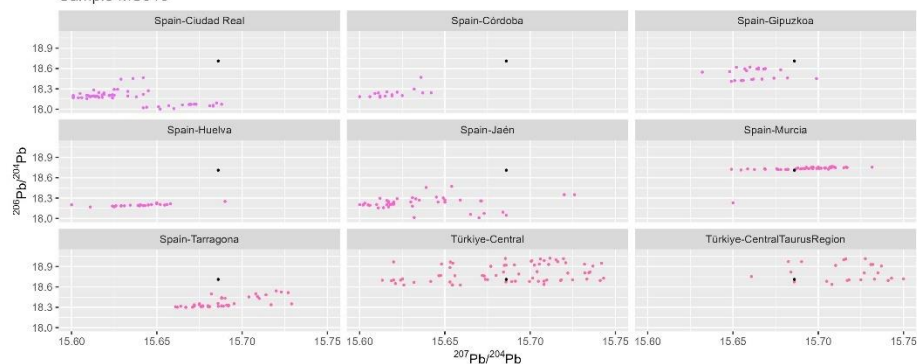

Sample MS010

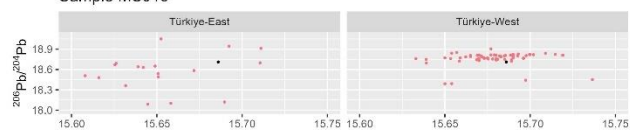

Sample MS010

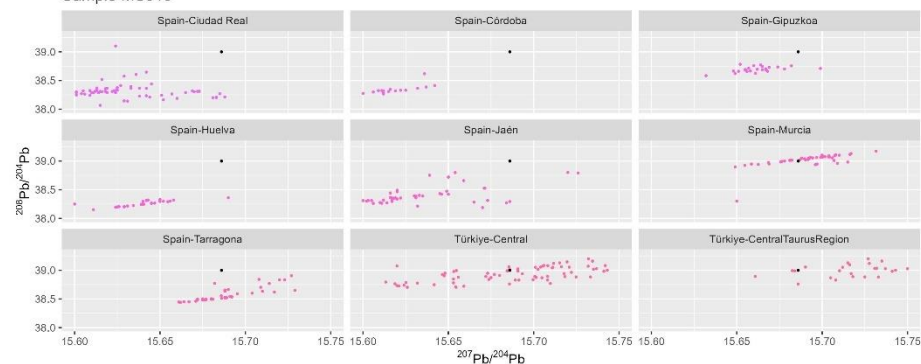

Sample MS010

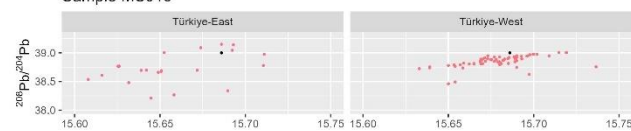 $^{207}\text{Pb}/^{204}\text{Pb}$ 

Sample MS011

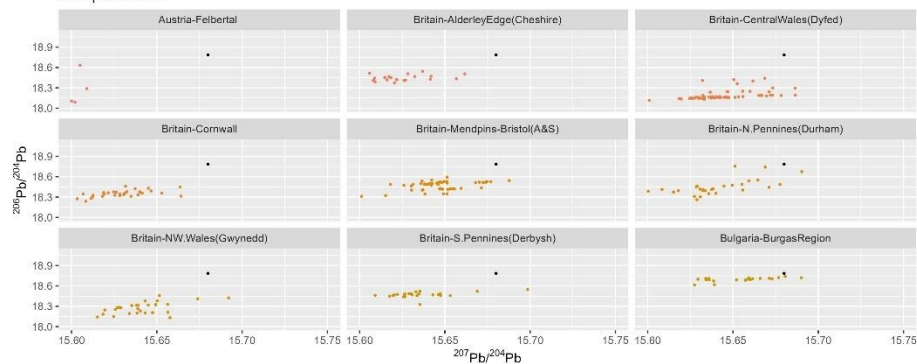 $^{207}\text{Pb}/^{204}\text{Pb}$ 

Sample MS011

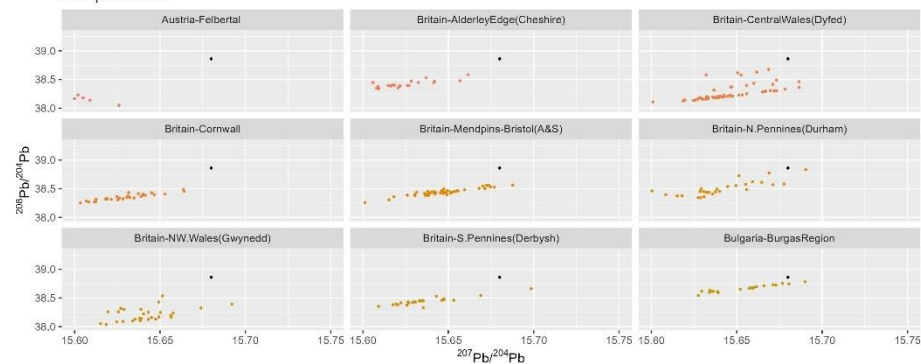

Sample MS011

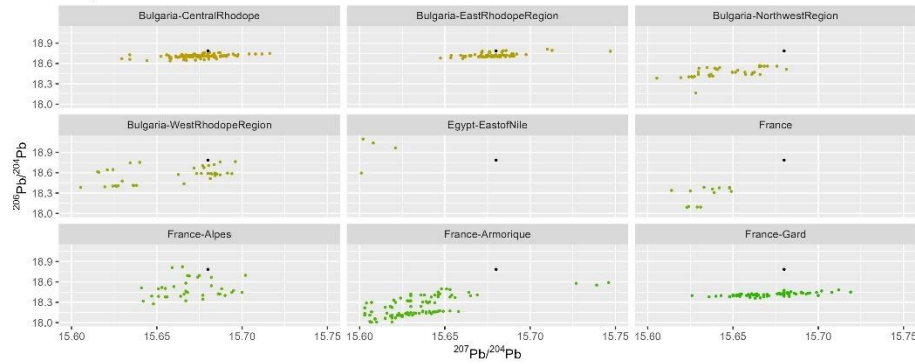

Sample MS011

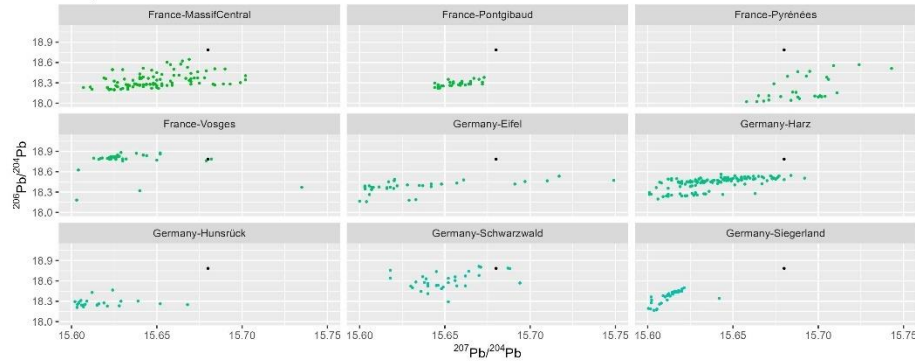

Sample MS011

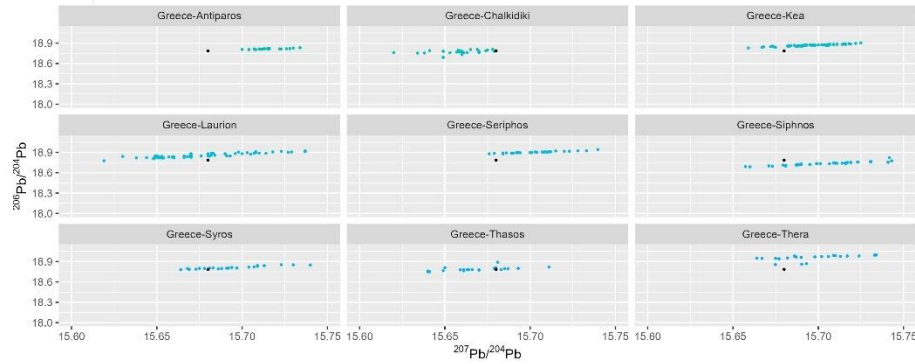

Sample MS011

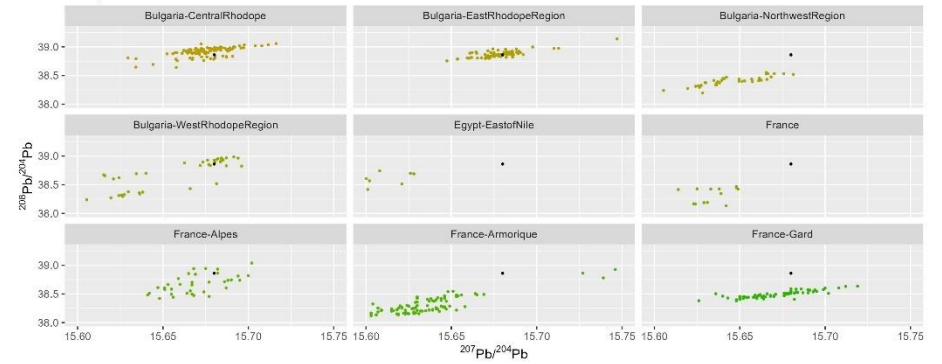

Sample MS011

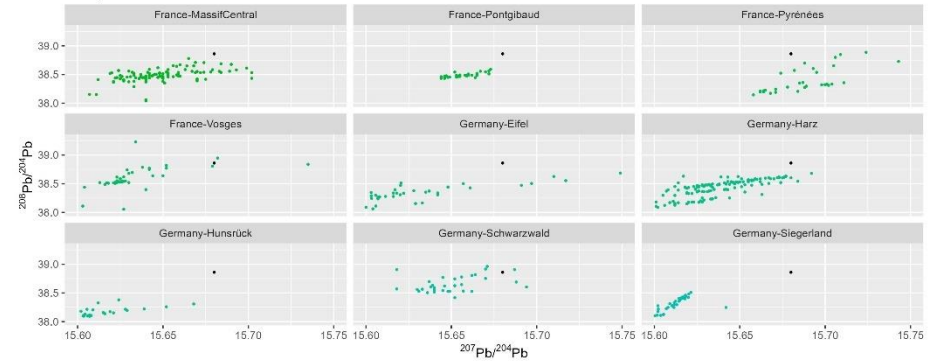

Sample MS011

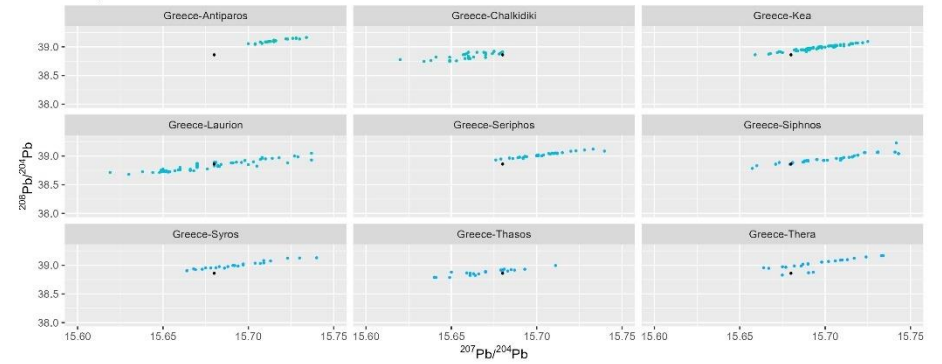

Sample MS011

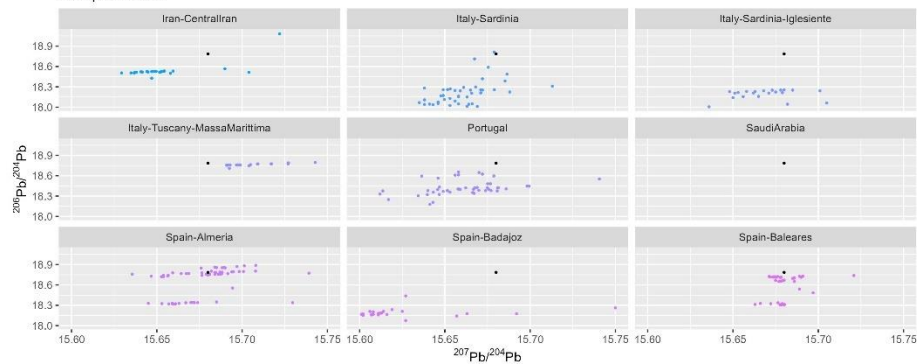

Sample MS011

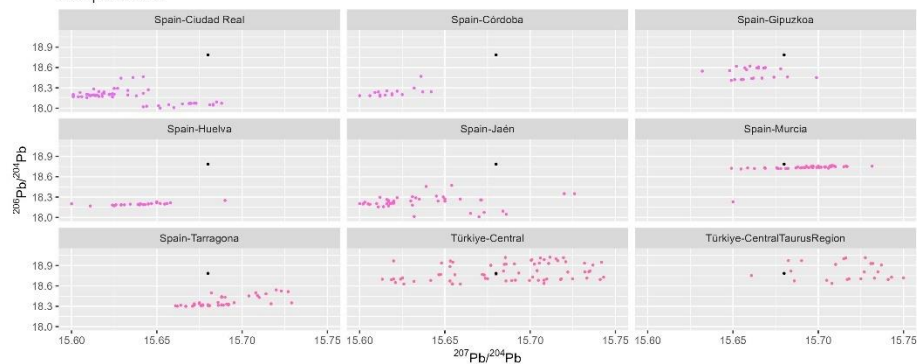

Sample MS011

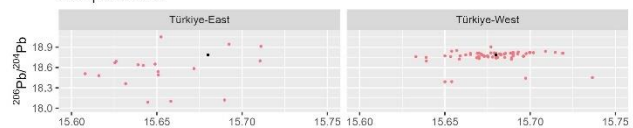 $^{207}\text{Pb}/^{204}\text{Pb}$ 

Sample MS011

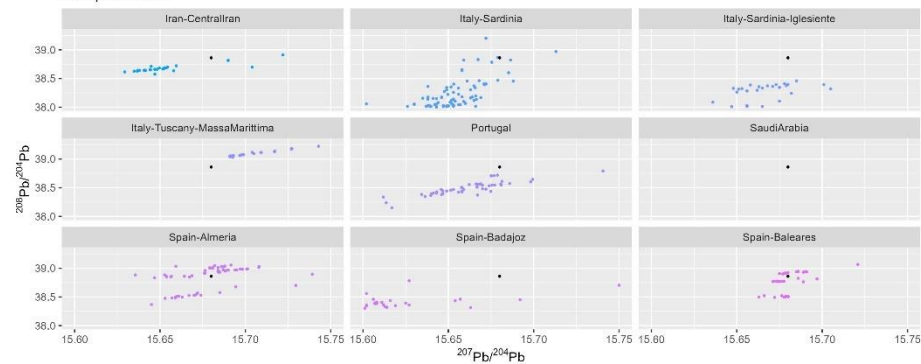

Sample MS011

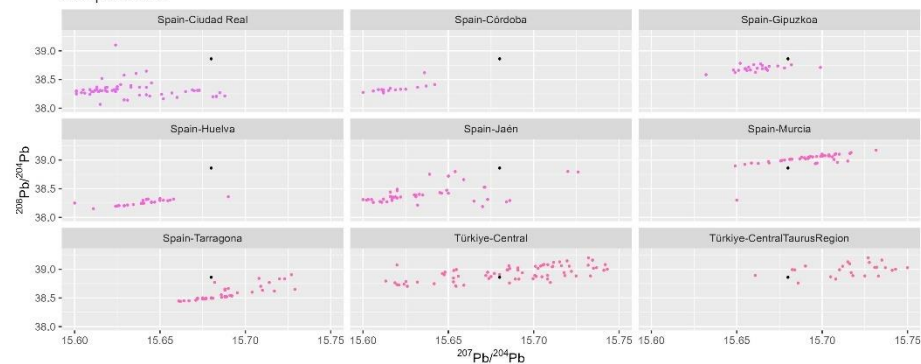

Sample MS011

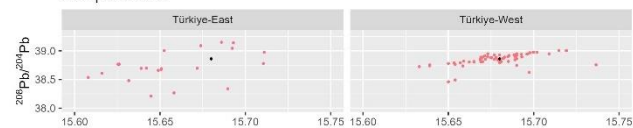 $^{207}\text{Pb}/^{204}\text{Pb}$



Sample MS012

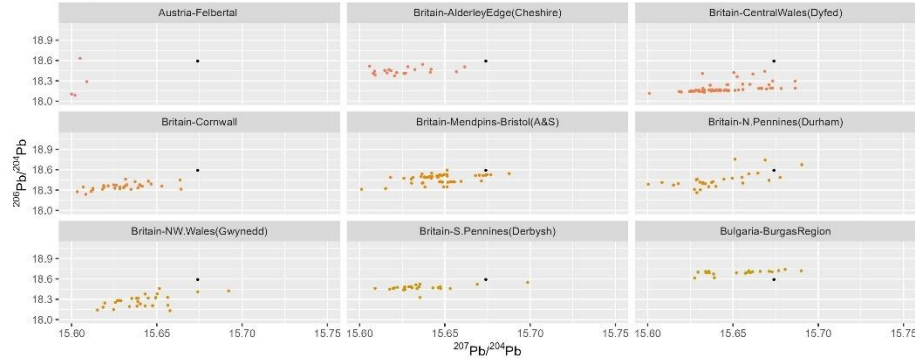

Sample MS012

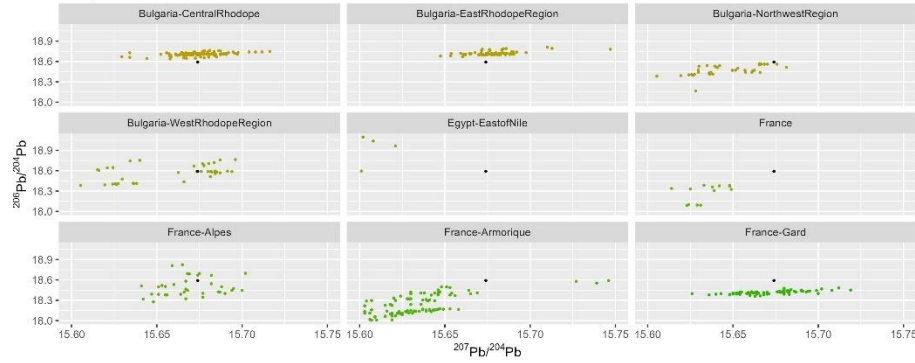

Sample MS012

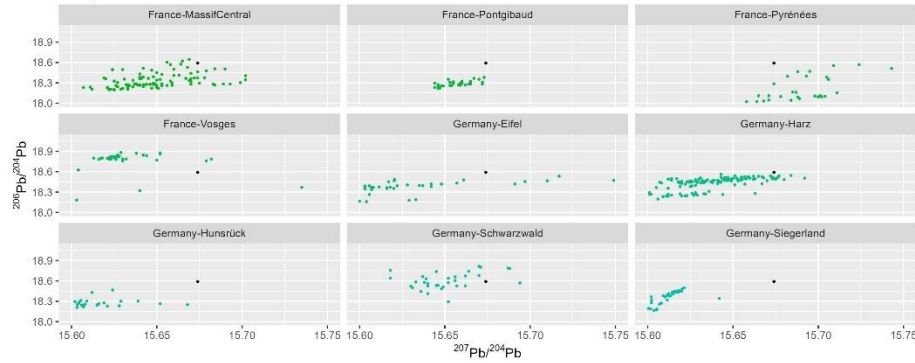

Sample MS012

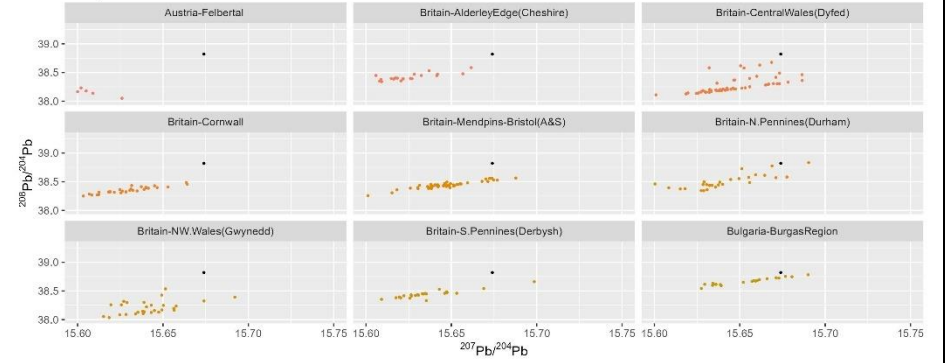

Sample MS012

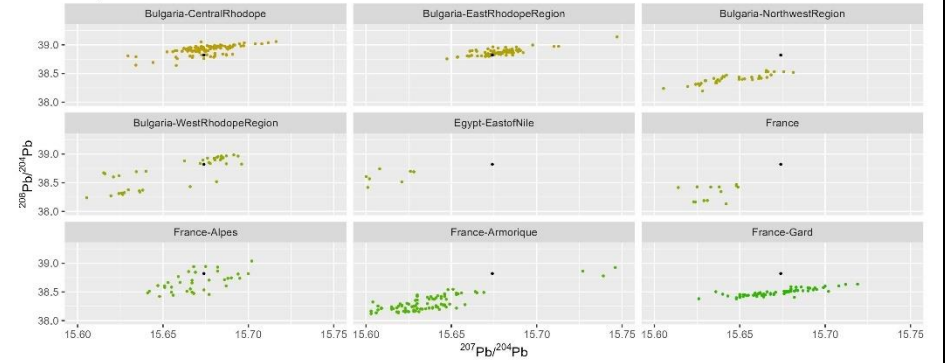

Sample MS012

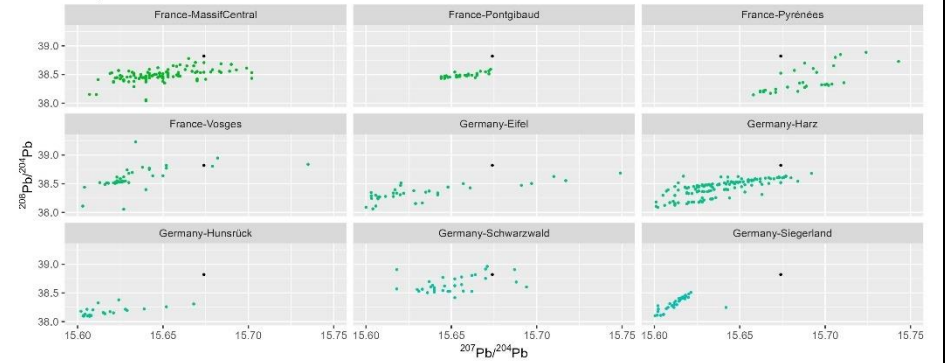

Sample MS012

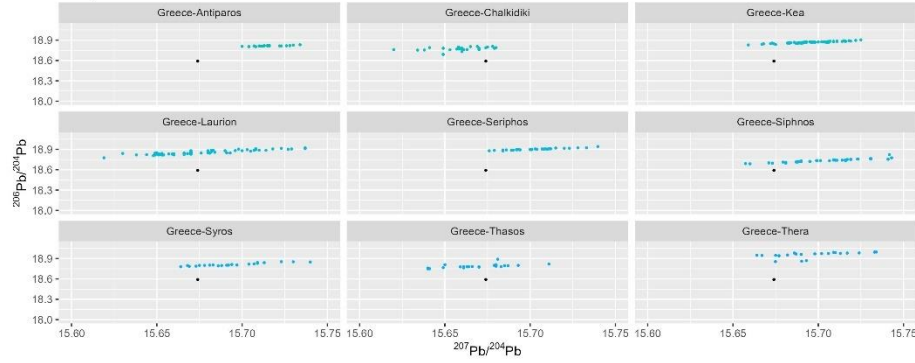

Sample MS012

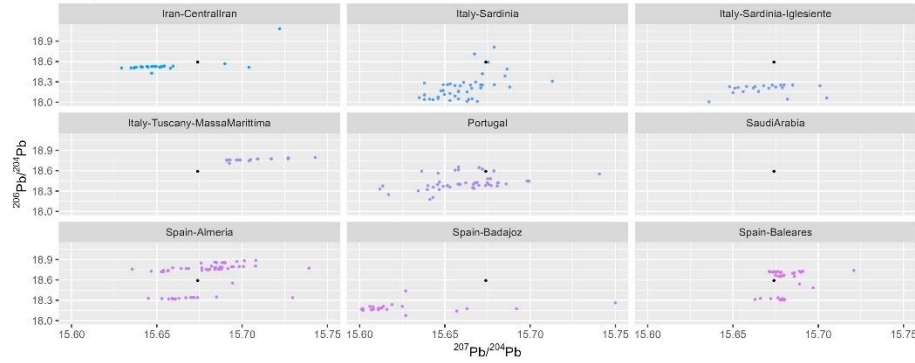

Sample MS012

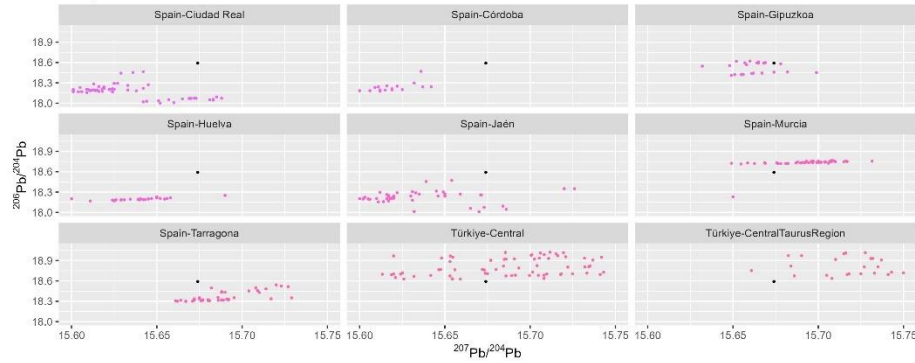

Sample MS012

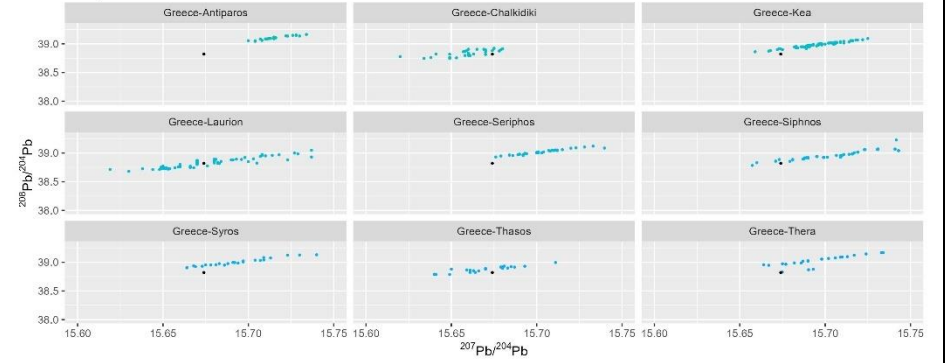

Sample MS012

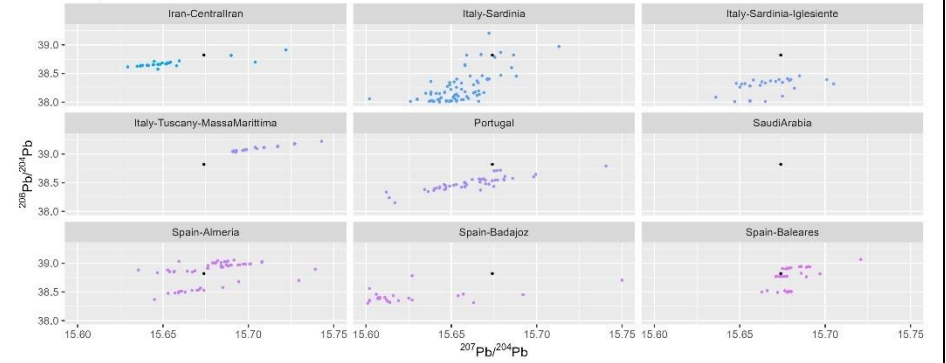

Sample MS012

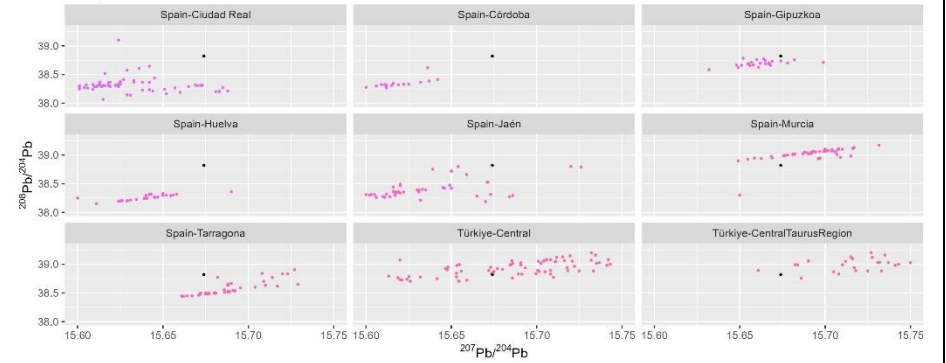

Sample MS012

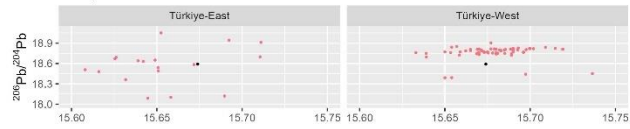

Sample MS012

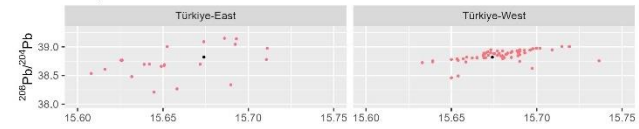

Sample MS013

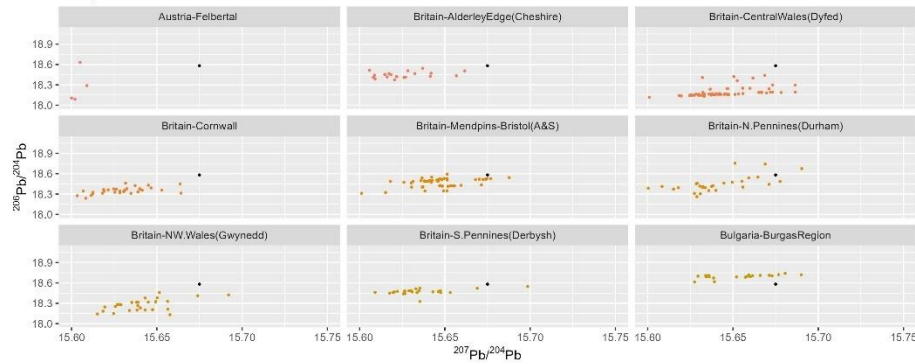

Sample MS013

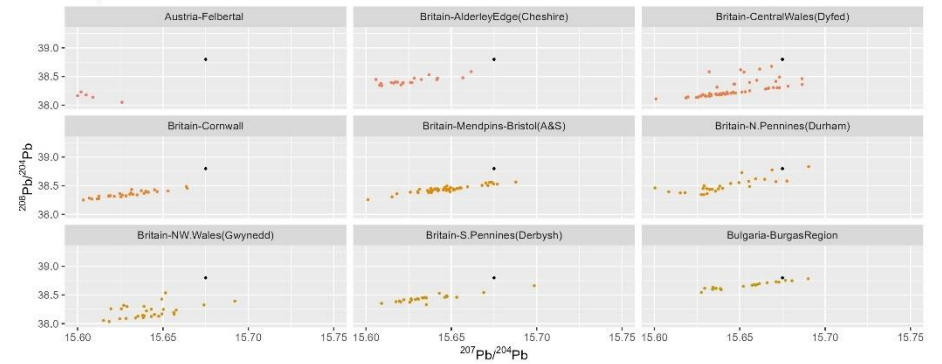

Sample MS013

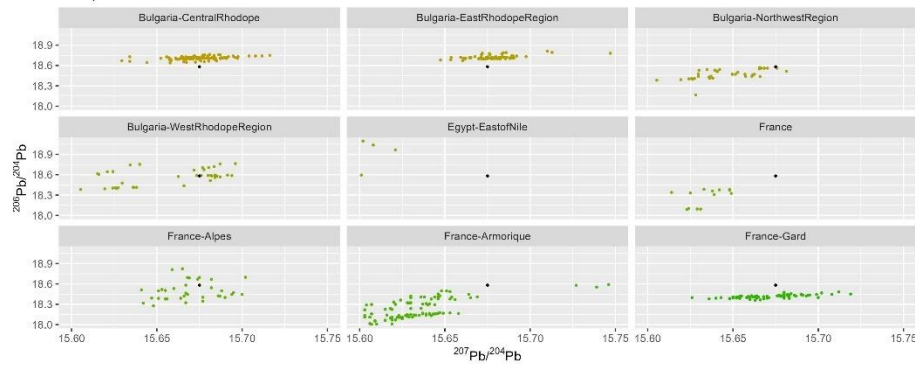

Sample MS013

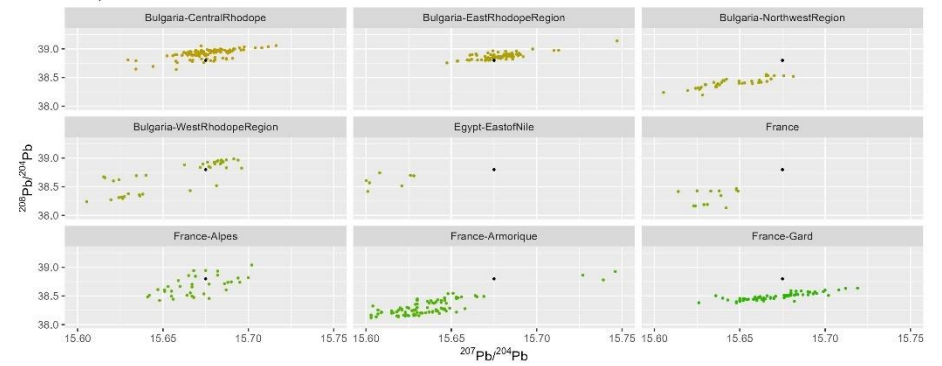

Sample MS013

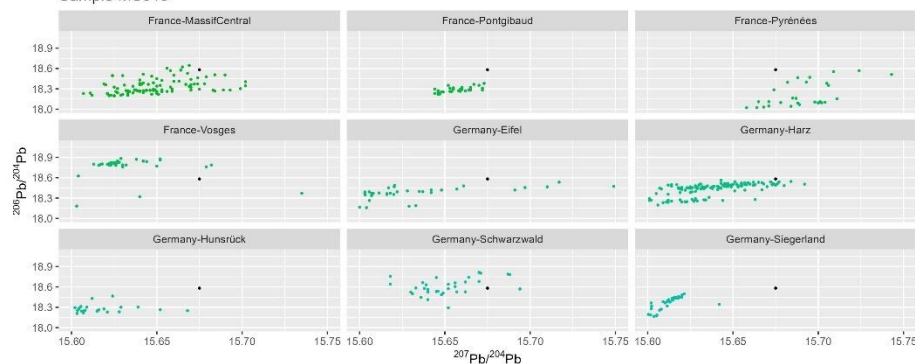

Sample MS013

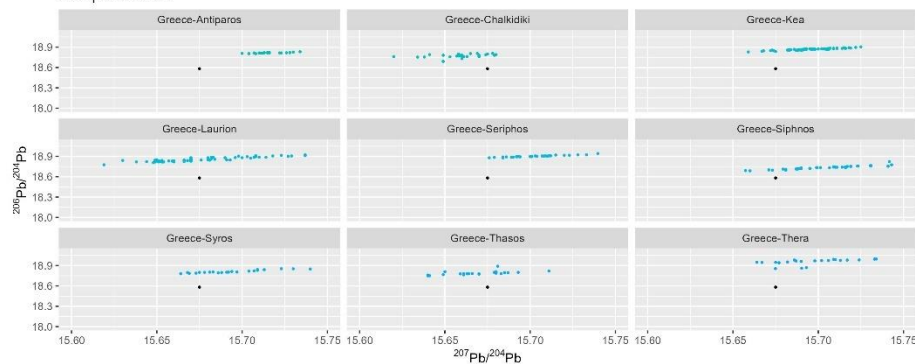

Sample MS013

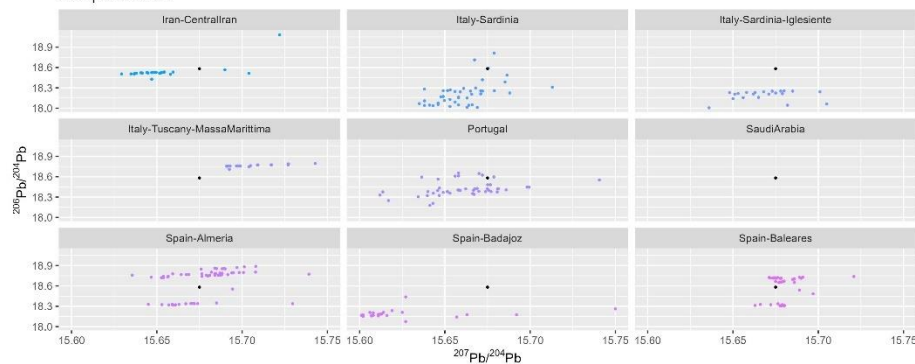

Sample MS013

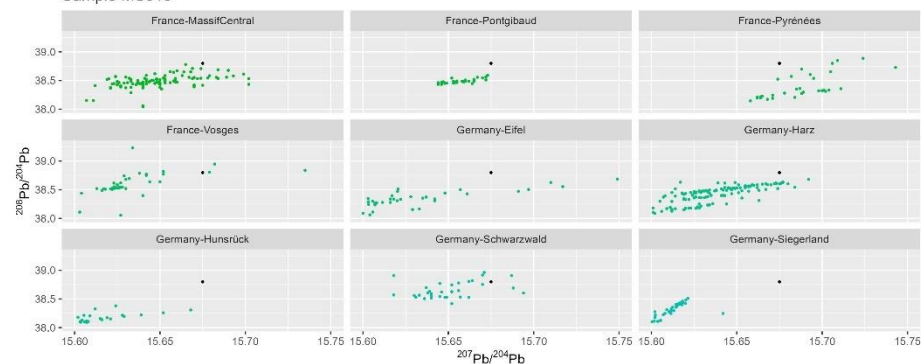

Sample MS013

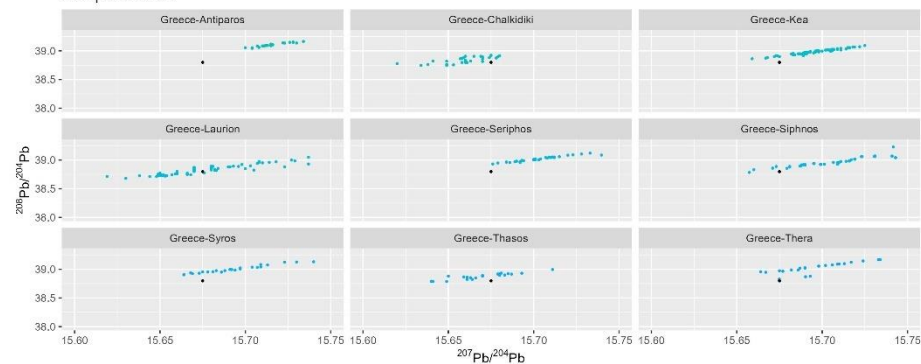

Sample MS013

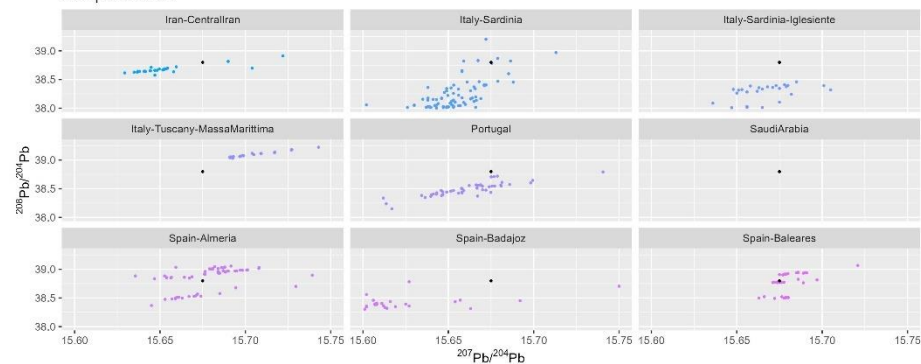



Sample MS013

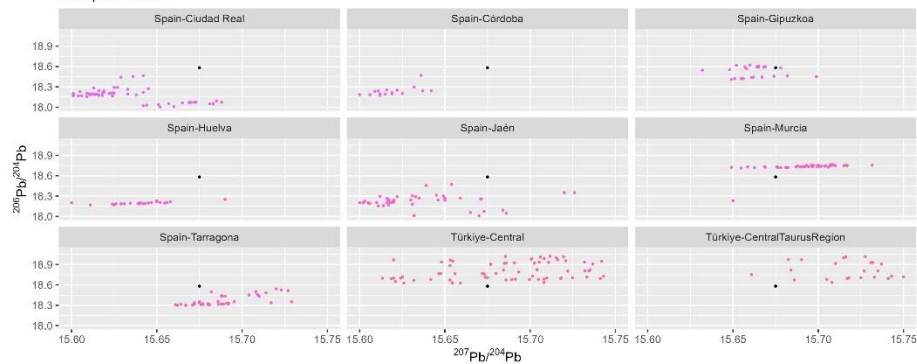

Sample MS013

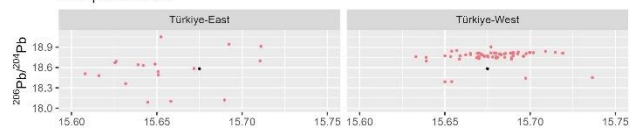

Sample MS013

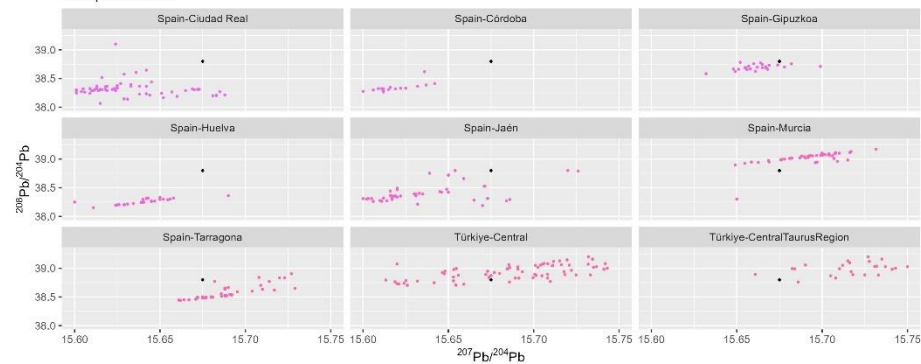

Sample MS013

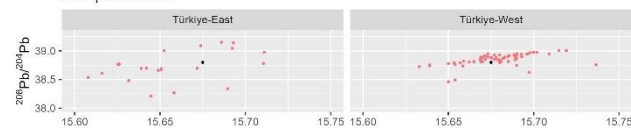

Sample MS014

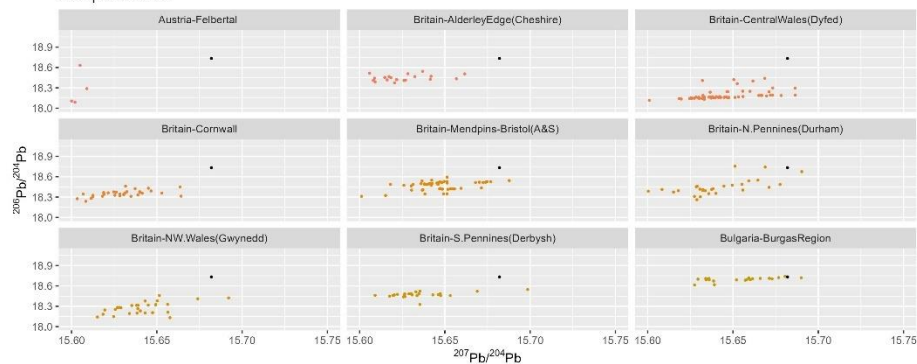

Sample MS014

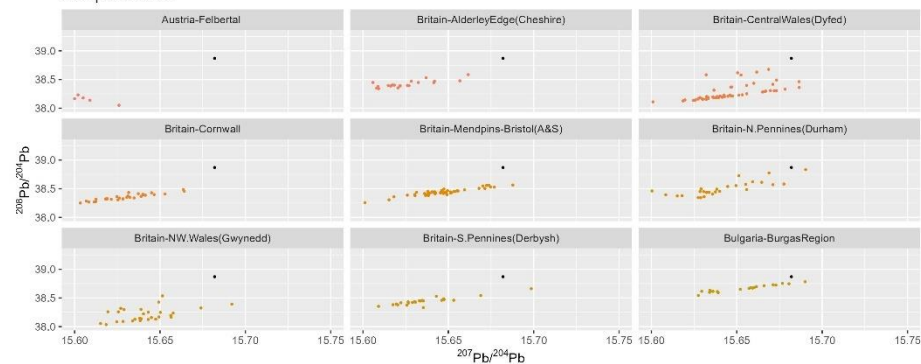



Sample MS014

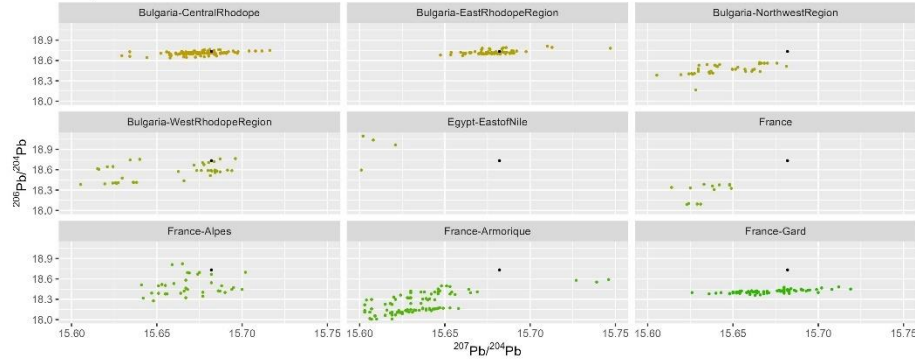

Sample MS014

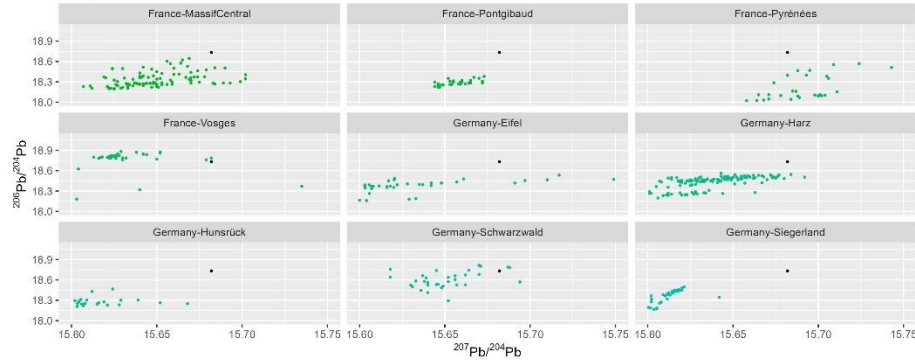

Sample MS014

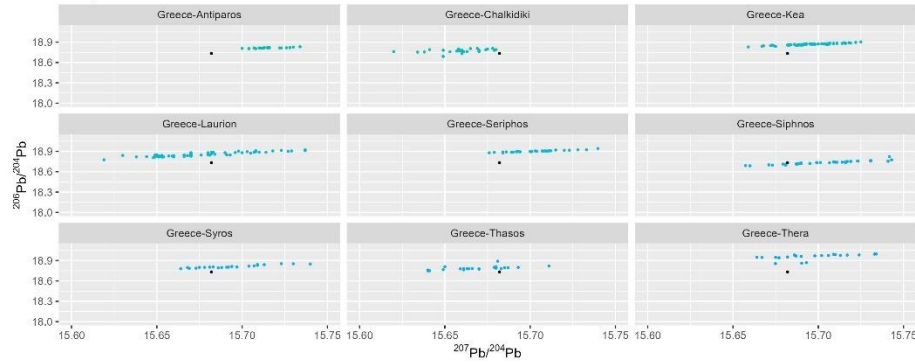

Sample MS014

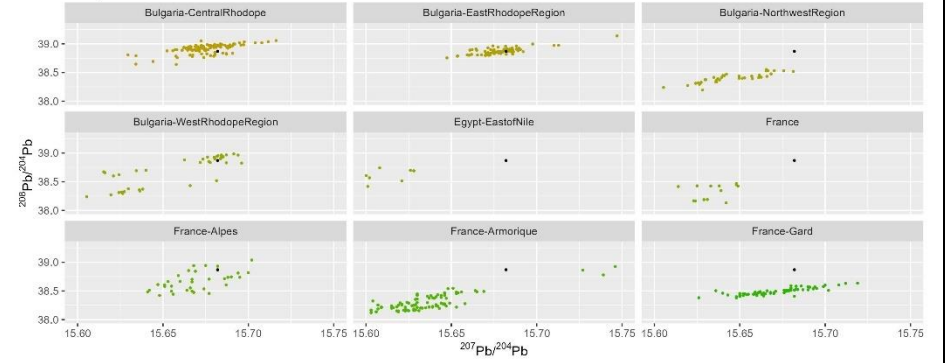

Sample MS014

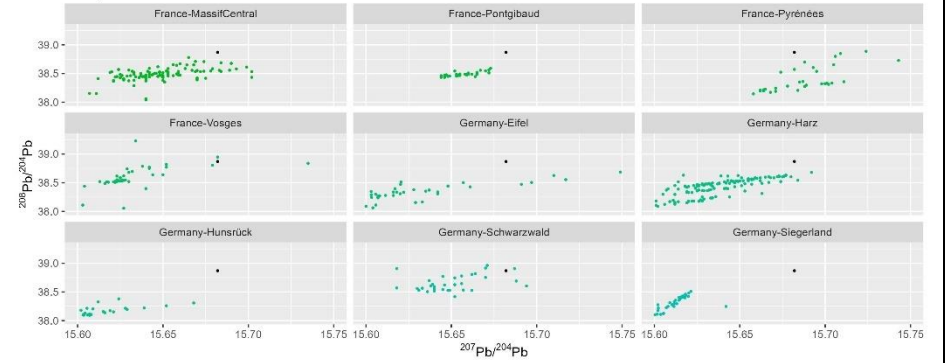

Sample MS014

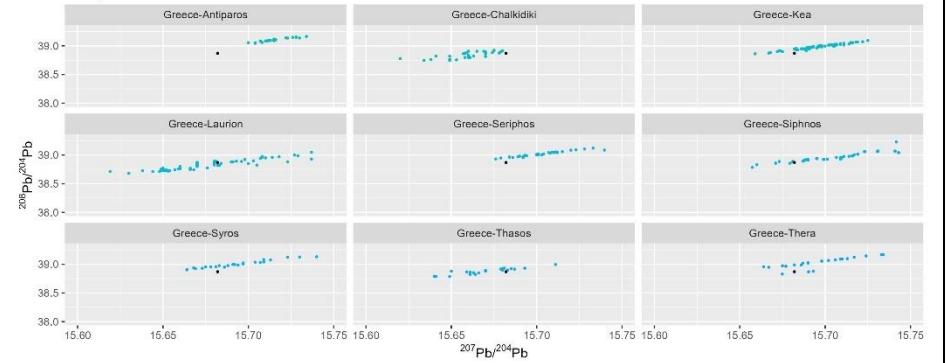

Sample MS014

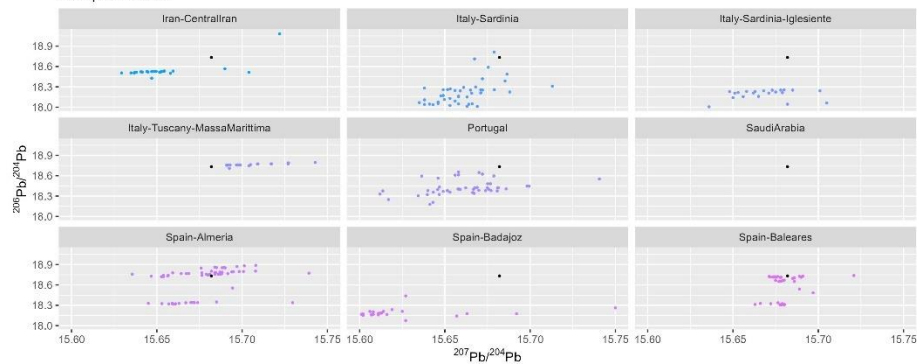

Sample MS014

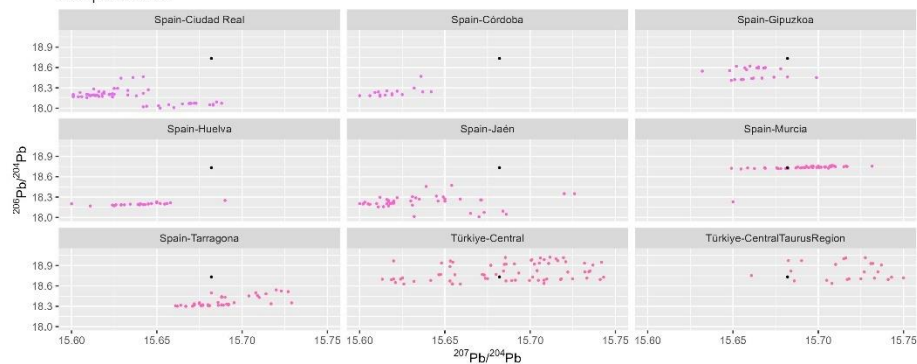

Sample MS014

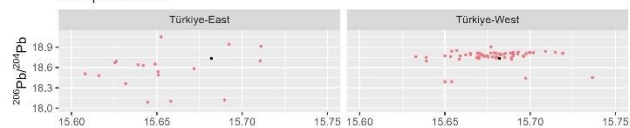

$^{207}\text{Pb}/^{204}\text{Pb}$

Sample MS014

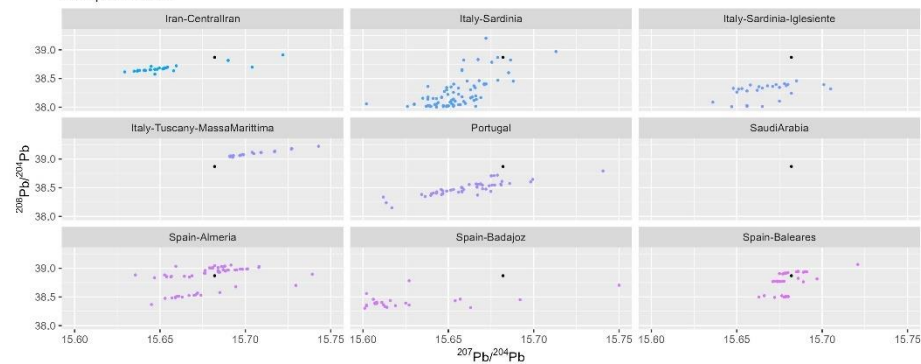

Sample MS014

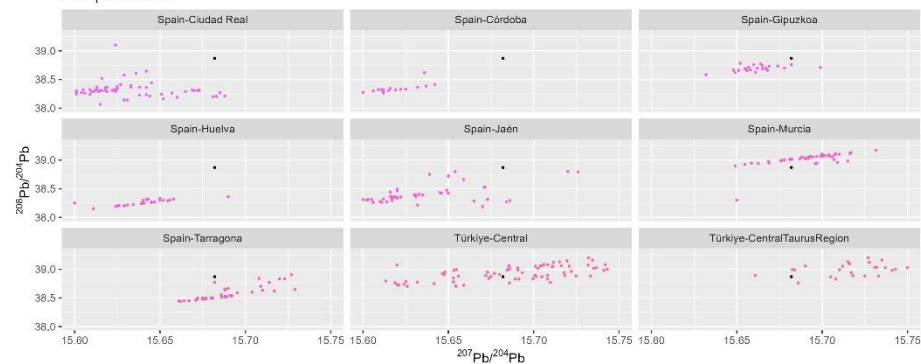

Sample MS014

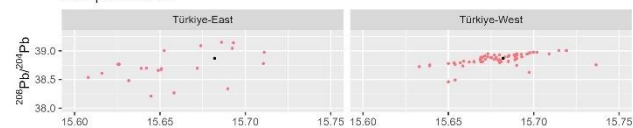

$^{207}\text{Pb}/^{204}\text{Pb}$

Sample MS015

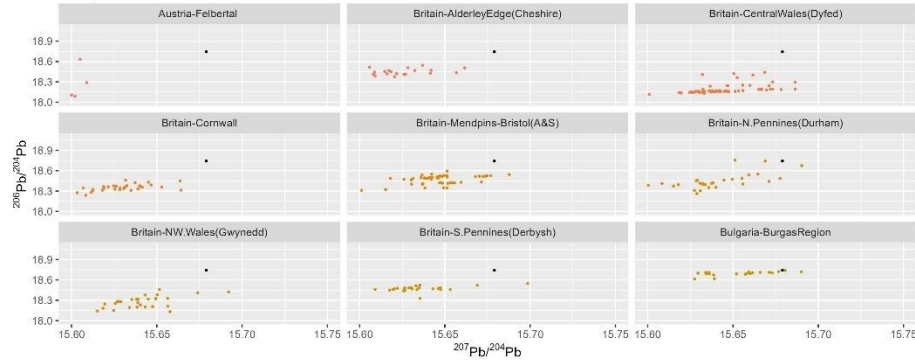

Sample MS015

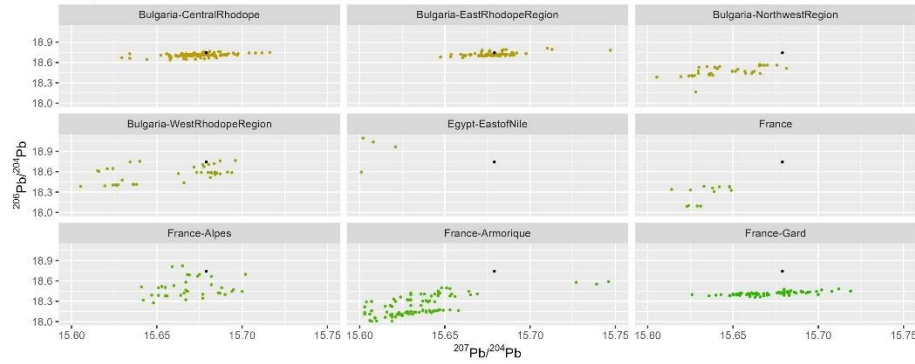

Sample MS015

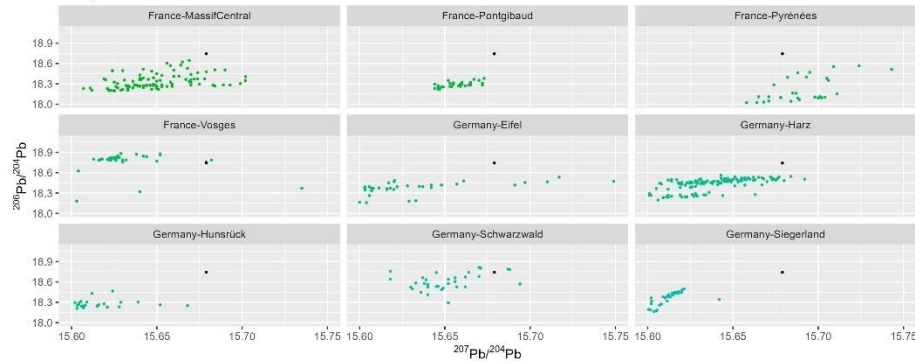

Sample MS015

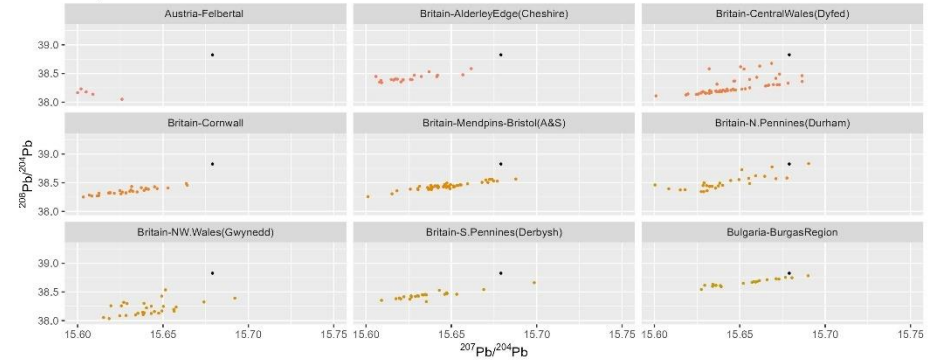

Sample MS015

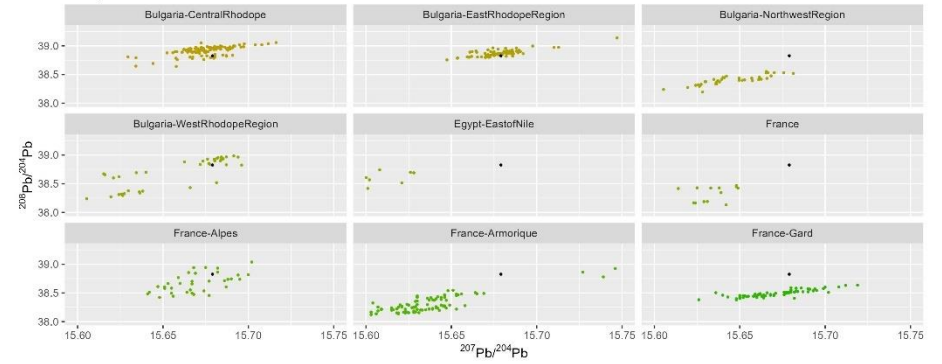

Sample MS015

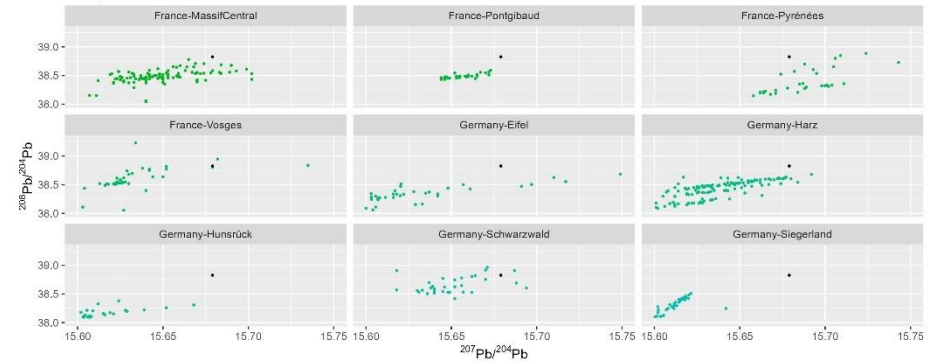

Sample MS015

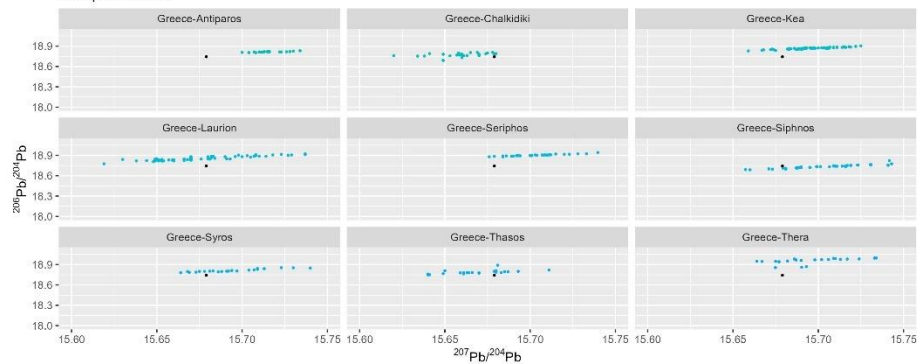

Sample MS015

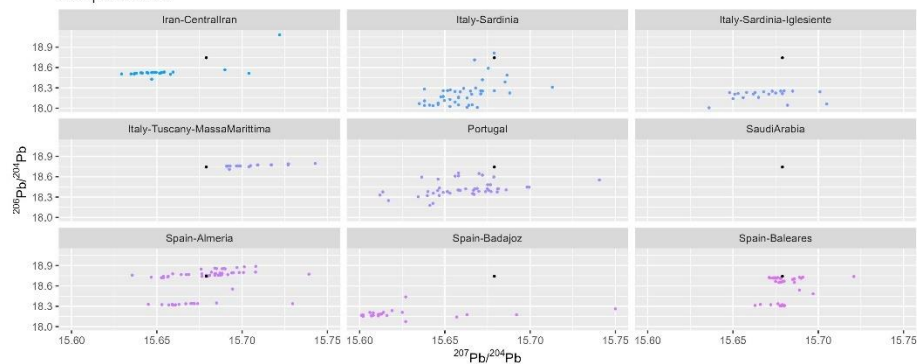

Sample MS015

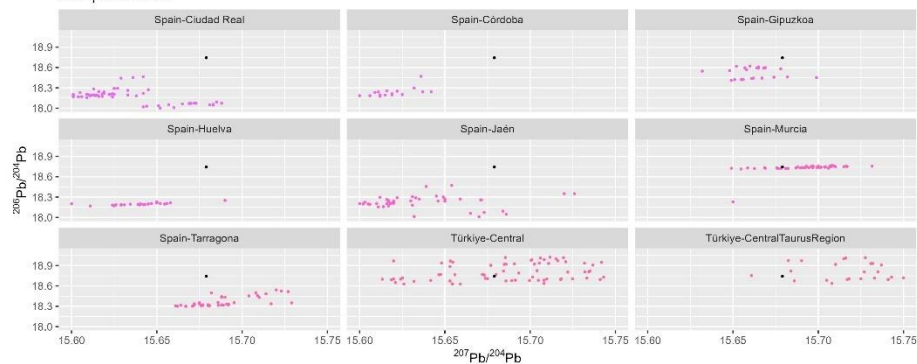

Sample MS015

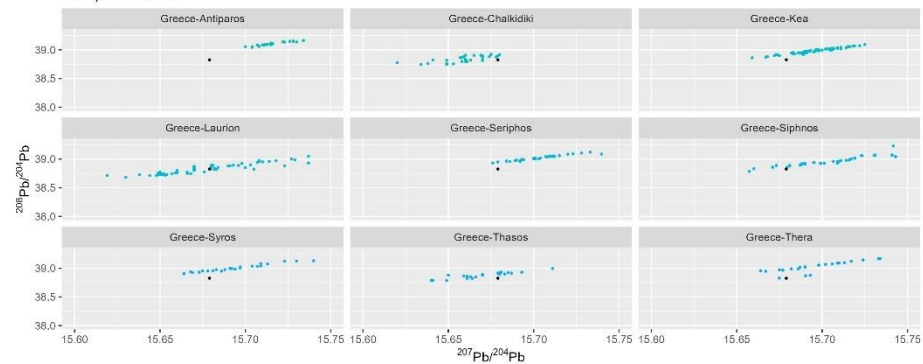

Sample MS015

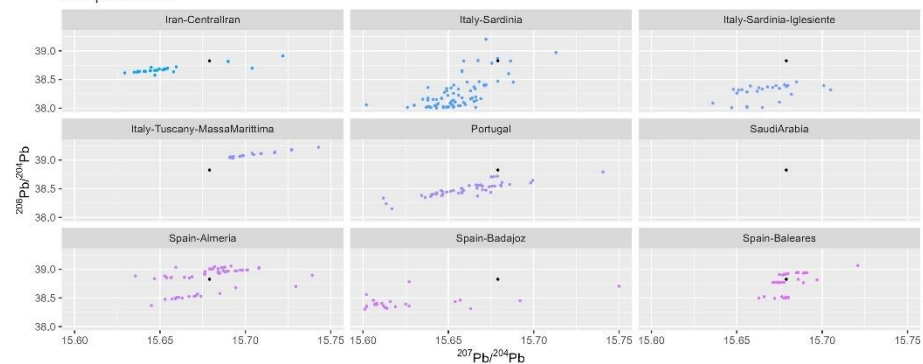

Sample MS015

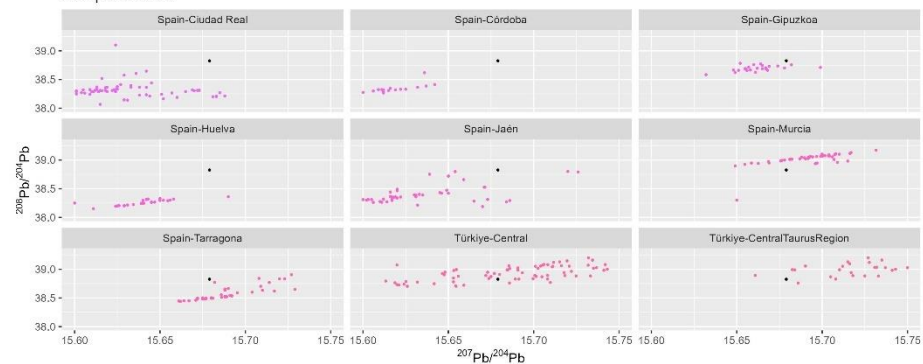



Sample MS015

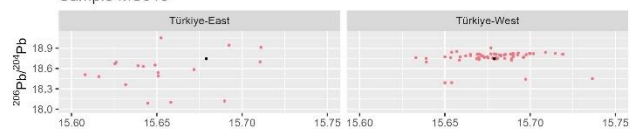

Sample MS016

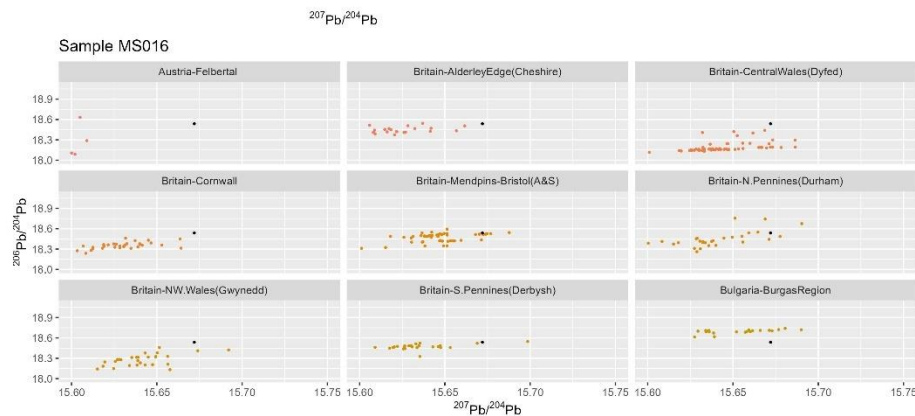

Sample MS016

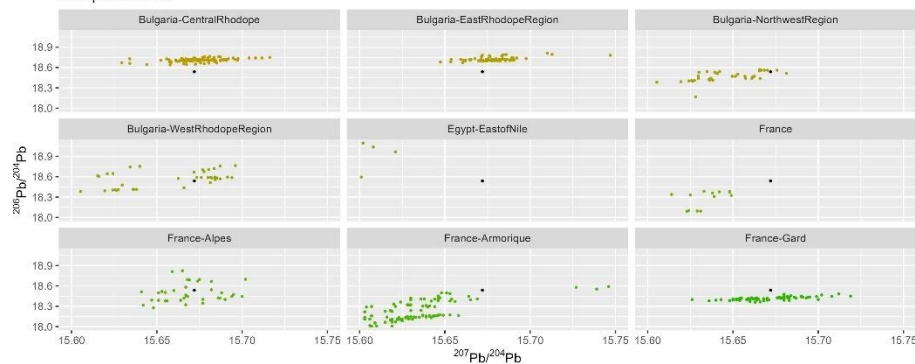

Sample MS015

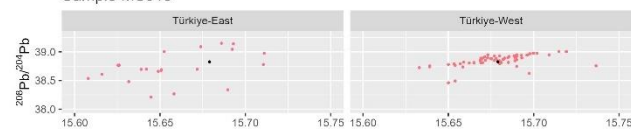

Sample MS016

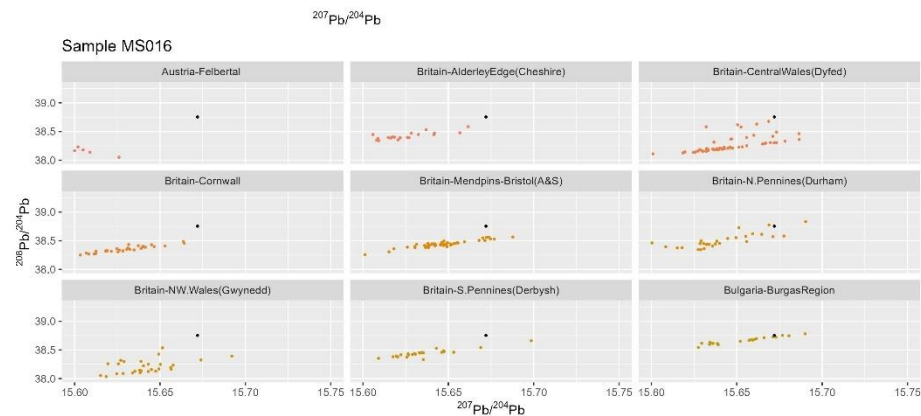

Sample MS016

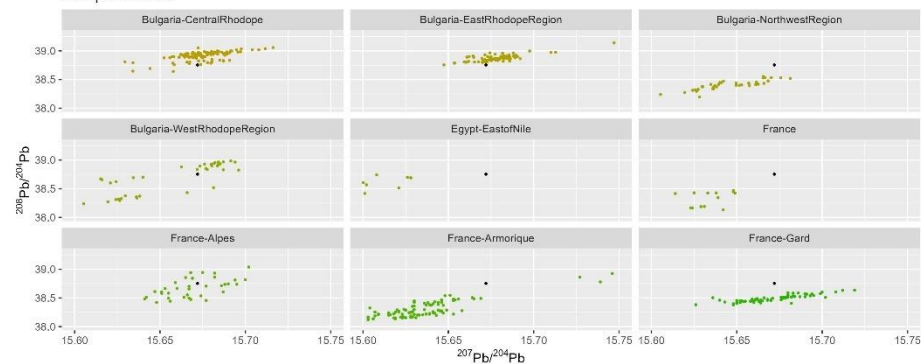



Sample MS016

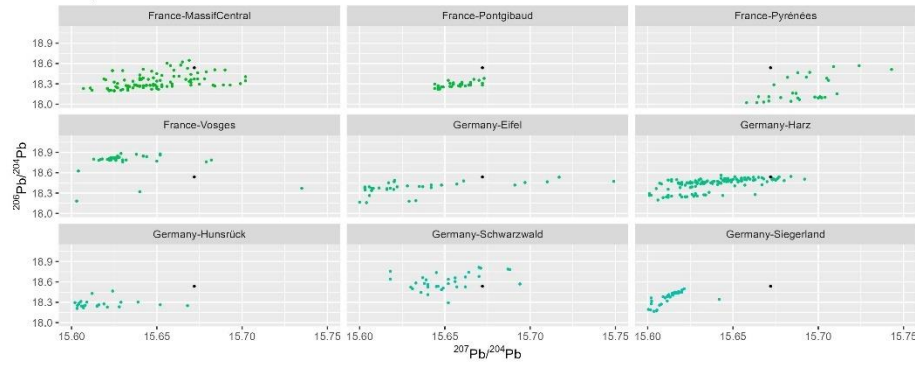

Sample MS016

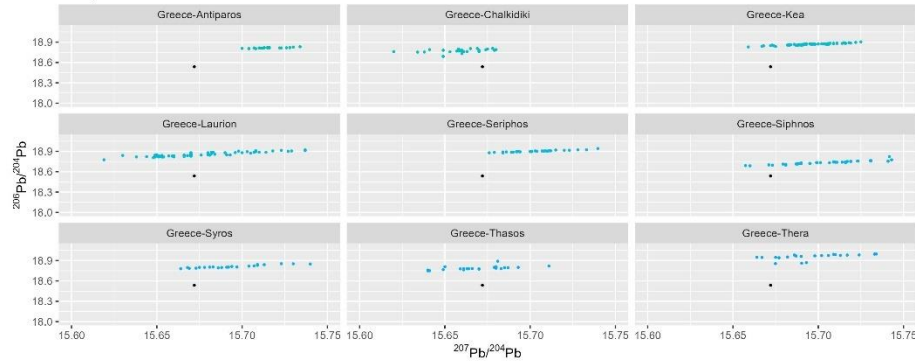

Sample MS016

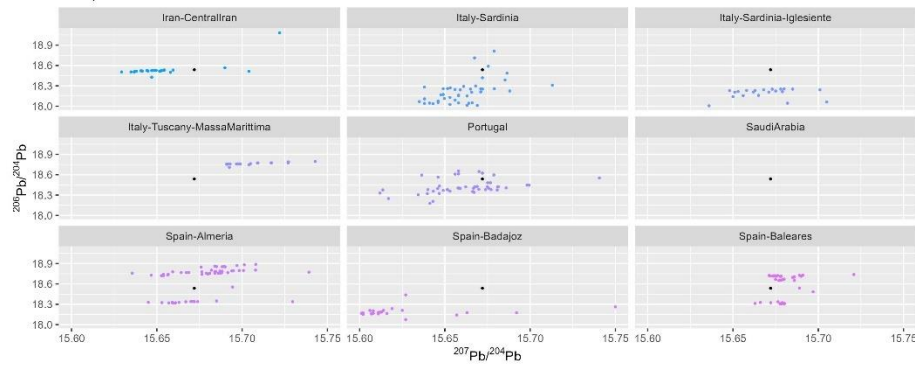

Sample MS016

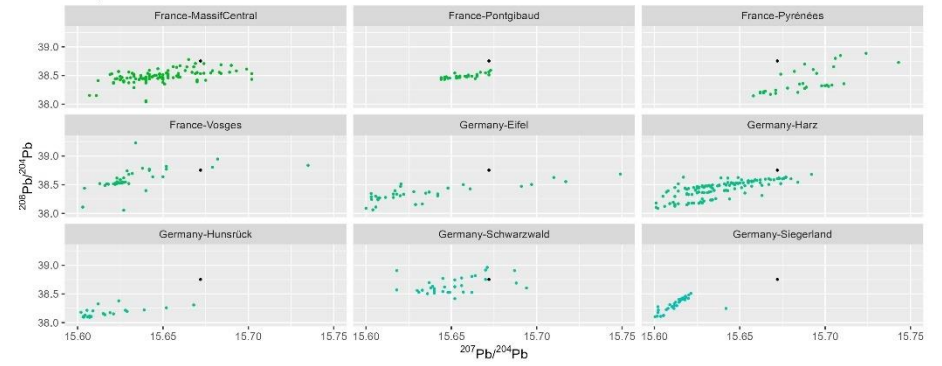

Sample MS016

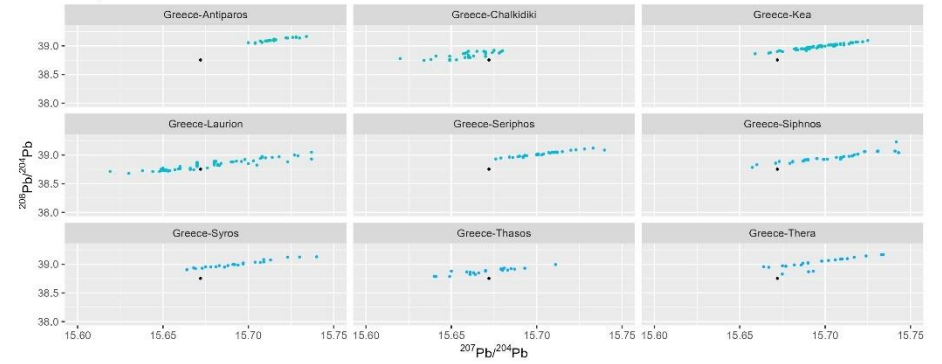

Sample MS016

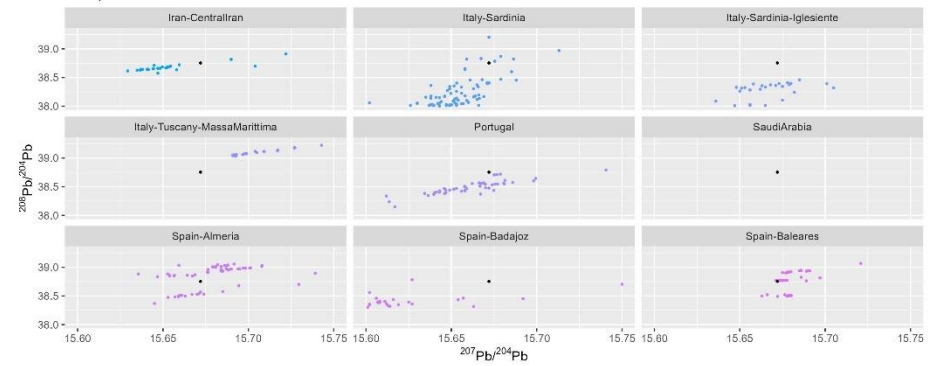

Sample MS016

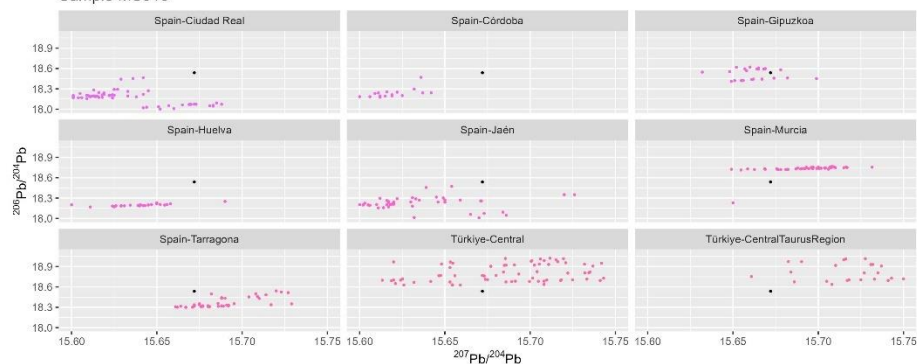

Sample MS016

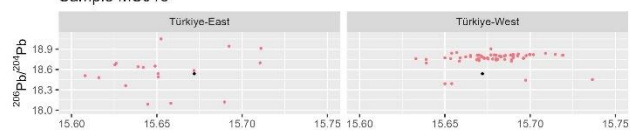 $^{207}\text{Pb}/^{204}\text{Pb}$ 

Sample MS017

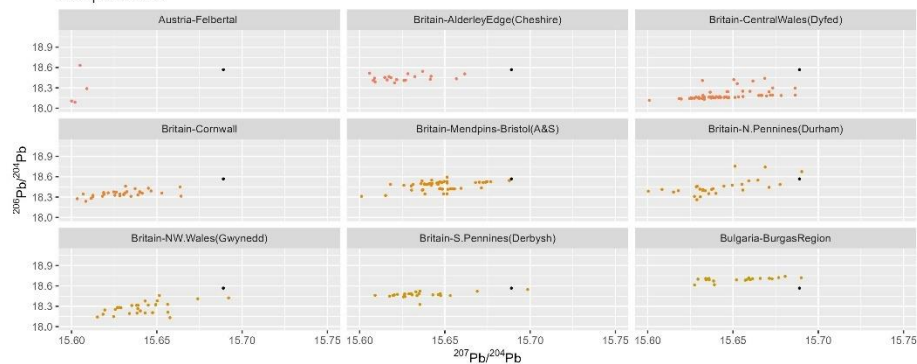

Sample MS016

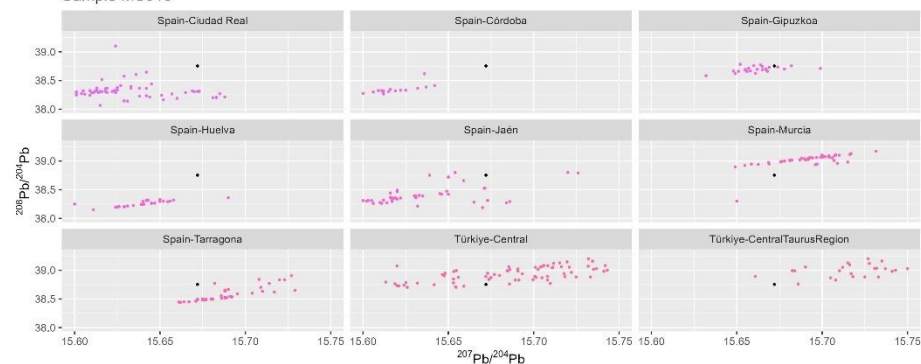

Sample MS016

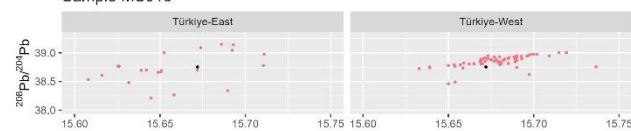 $^{207}\text{Pb}/^{204}\text{Pb}$ 

Sample MS017

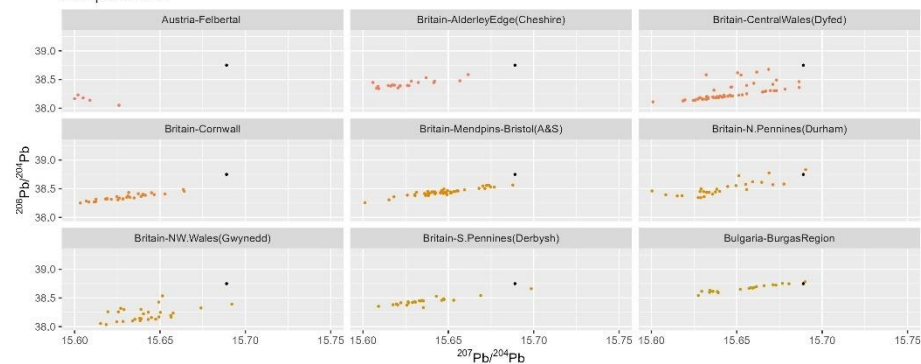

Sample MS017

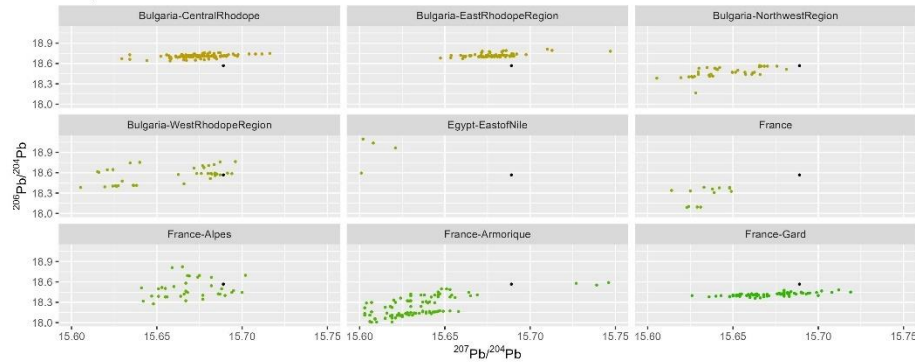

Sample MS017

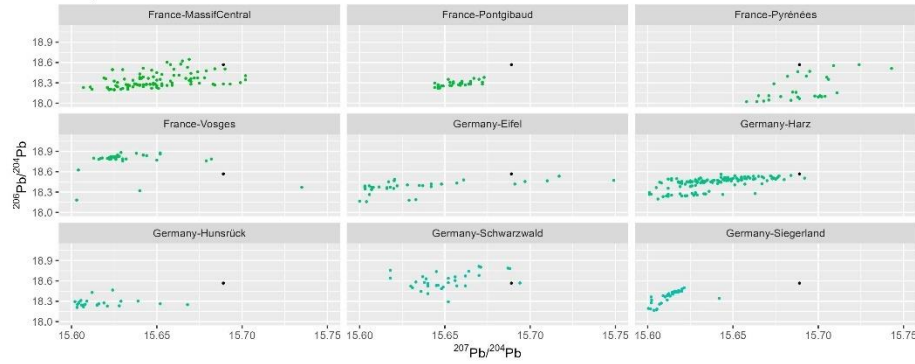

Sample MS017

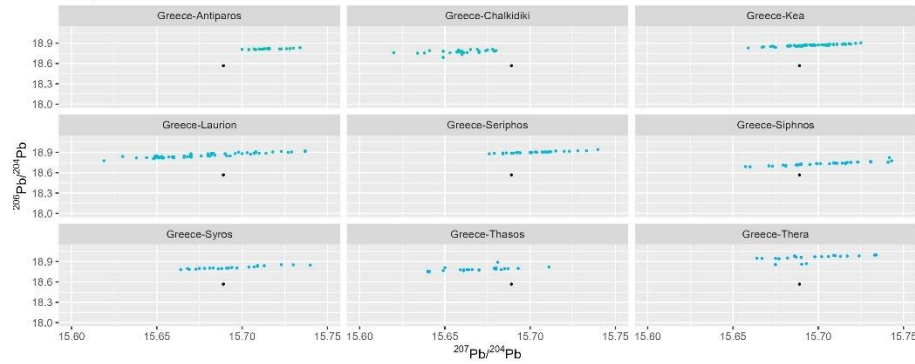

Sample MS017

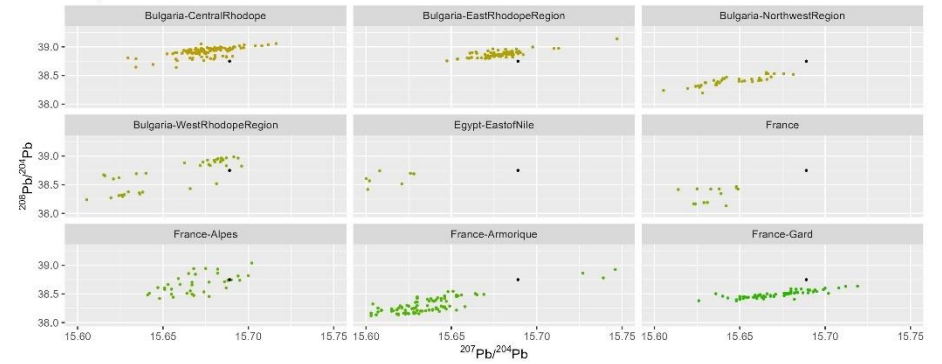

Sample MS017

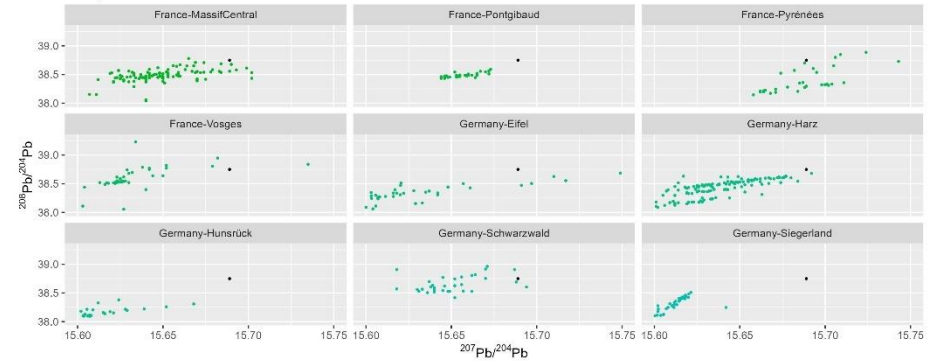

Sample MS017

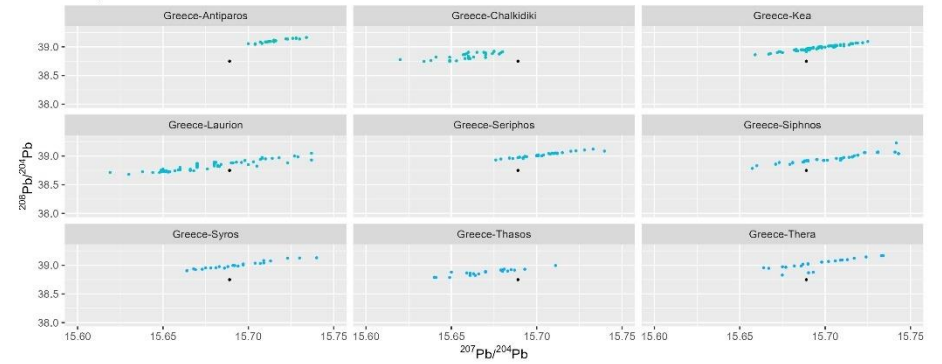

Sample MS017

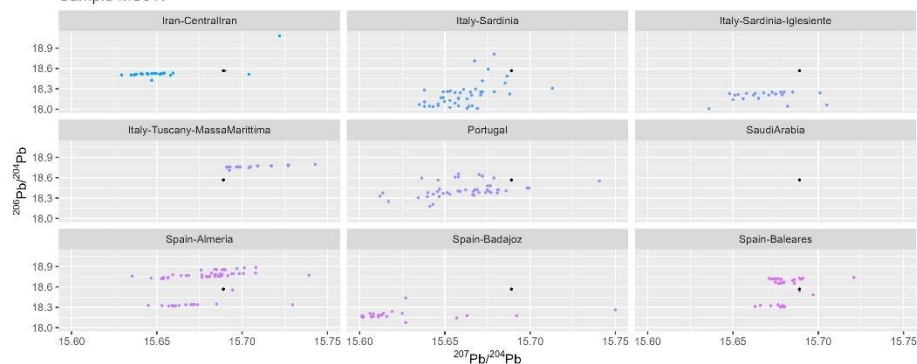

Sample MS017

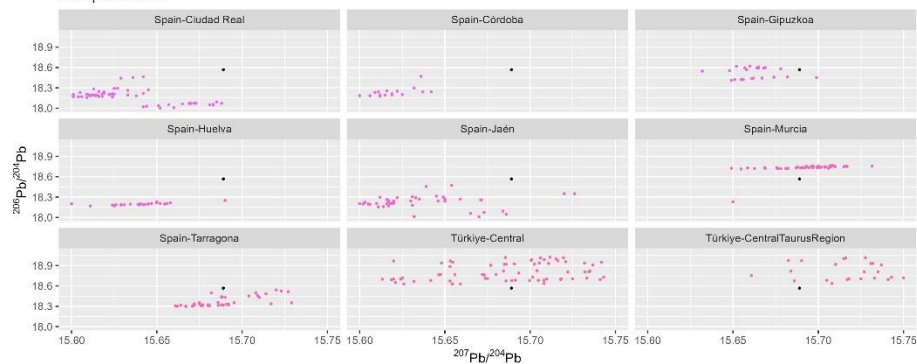

Sample MS017

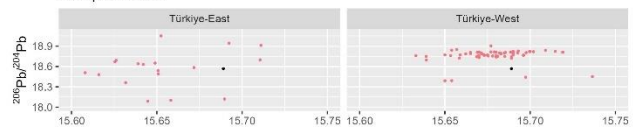 $^{207}\text{Pb}/^{204}\text{Pb}$ 

Sample MS017

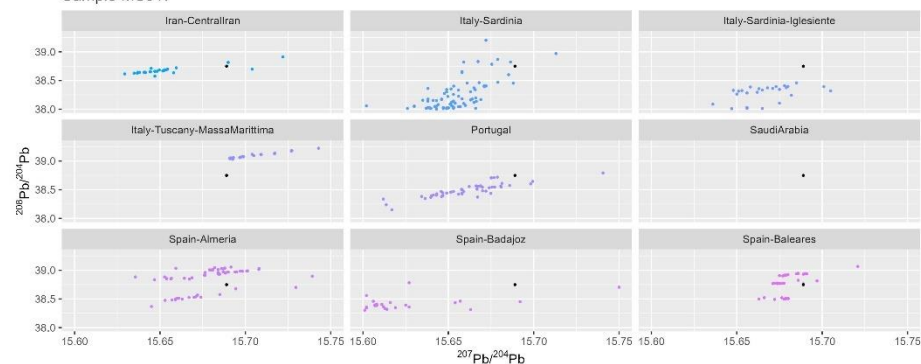

Sample MS017

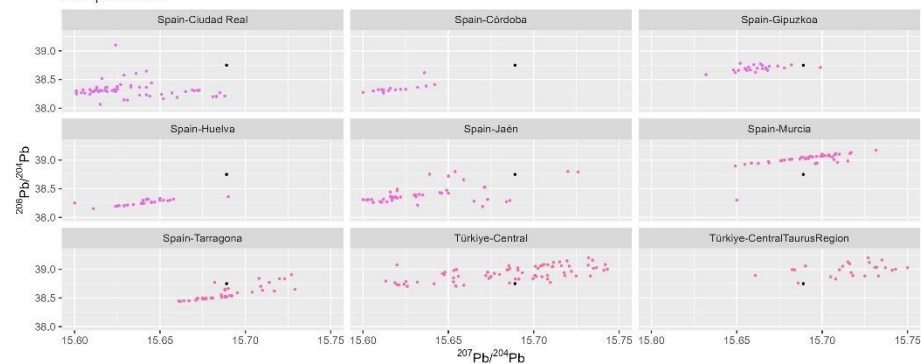

Sample MS017

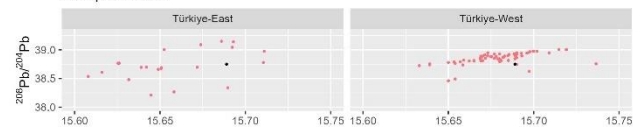 $^{207}\text{Pb}/^{204}\text{Pb}$



Sample MS018

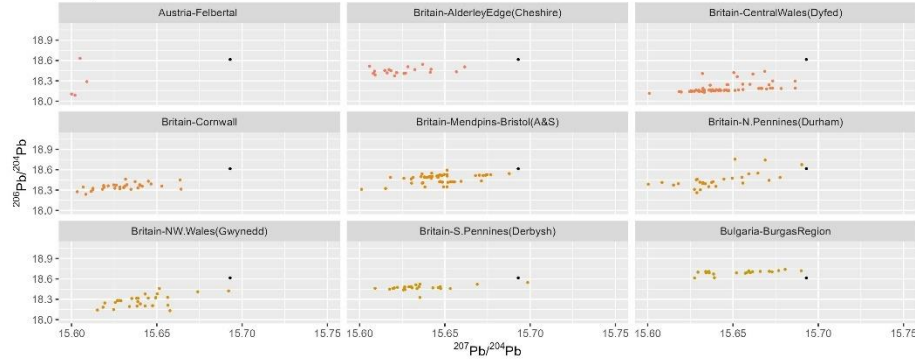

Sample MS018

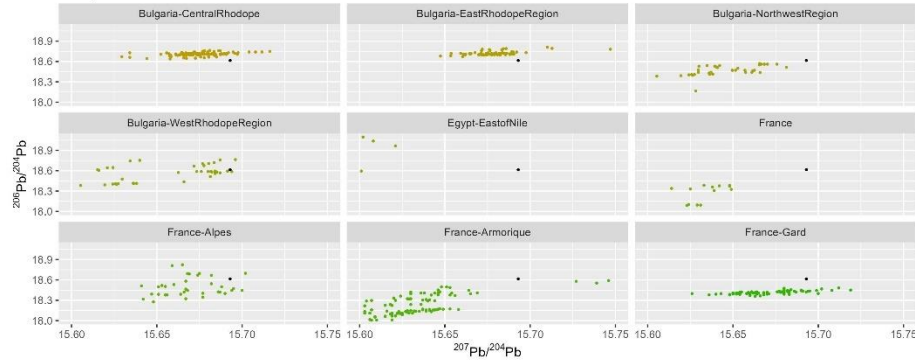

Sample MS018

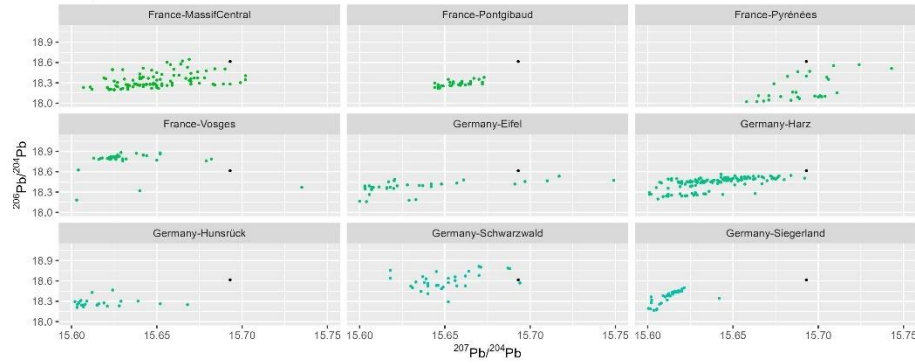

Sample MS018

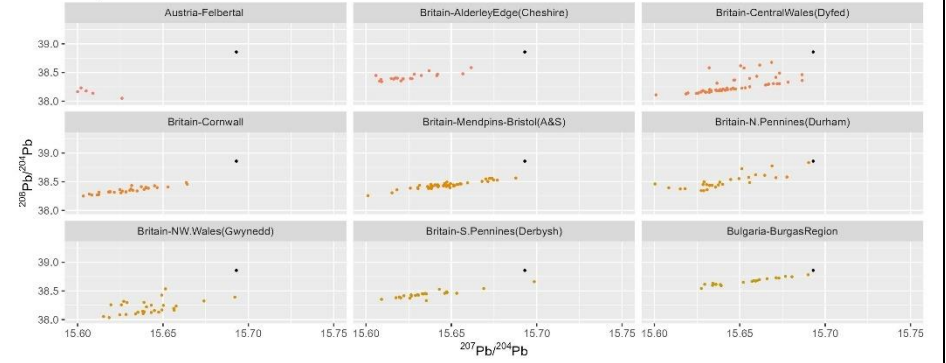

Sample MS018

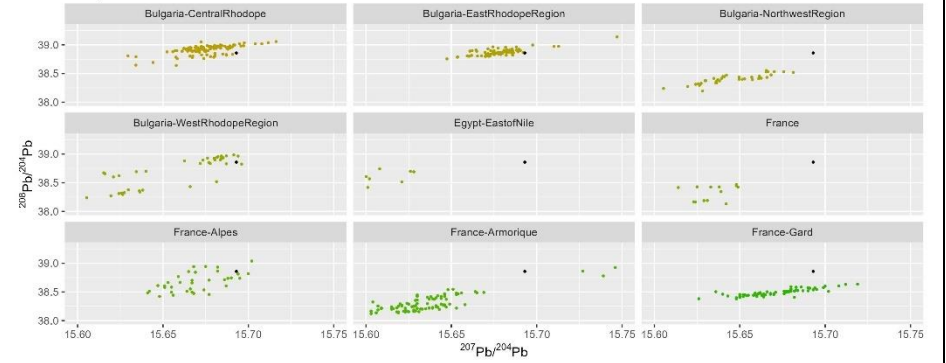

Sample MS018

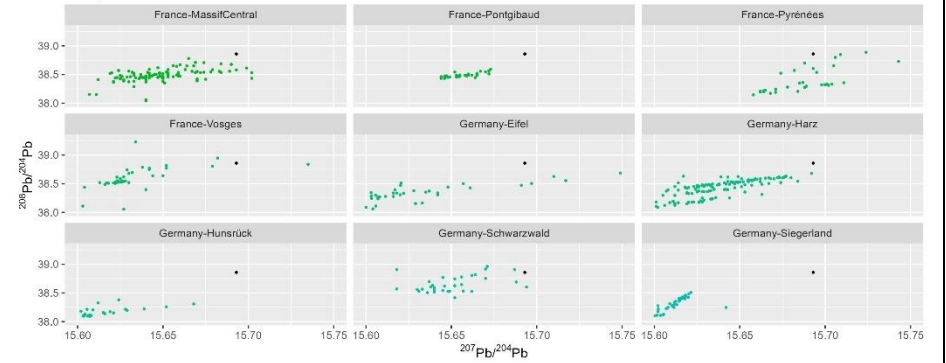



Sample MS018

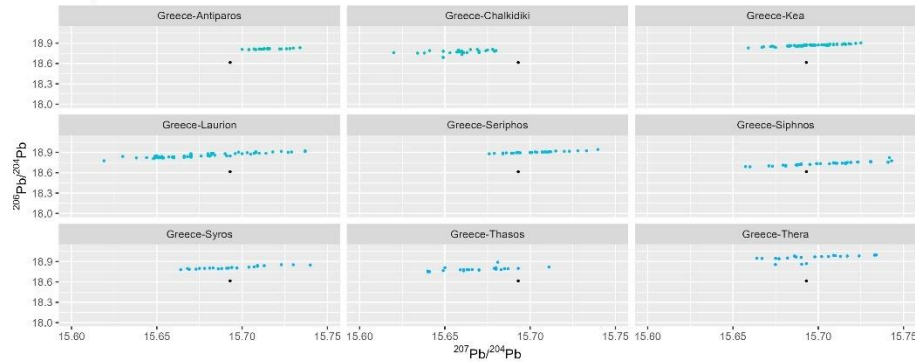

Sample MS018

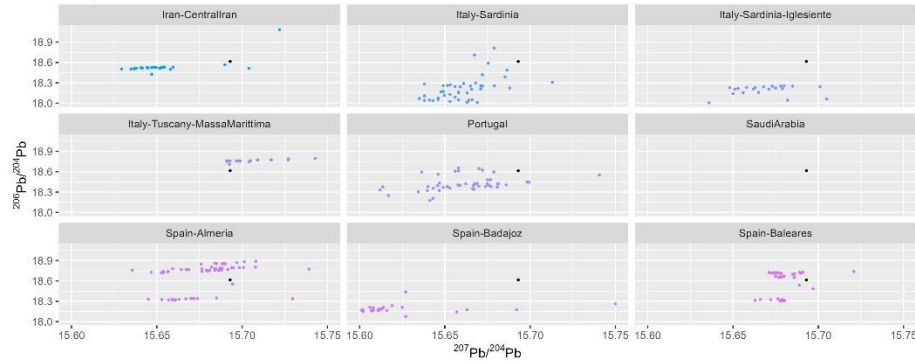

Sample MS018

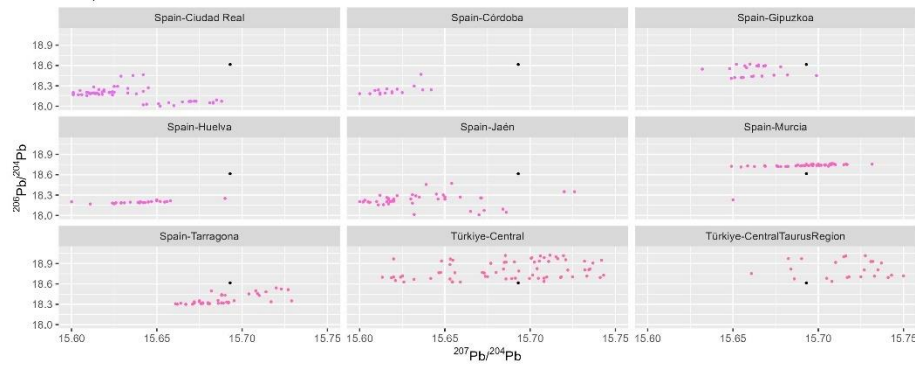

Sample MS018

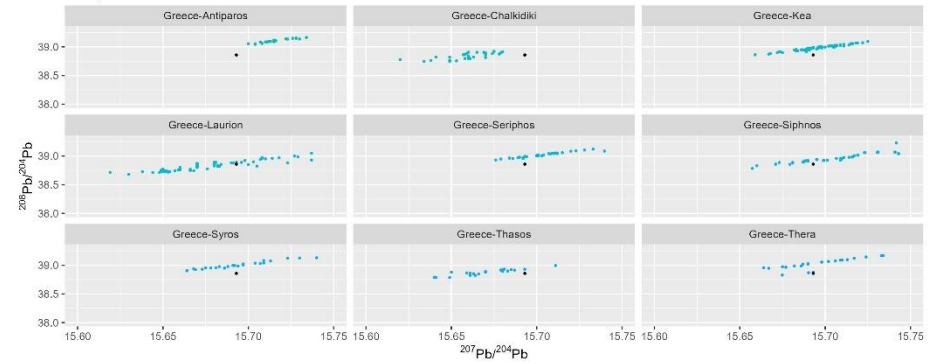

Sample MS018

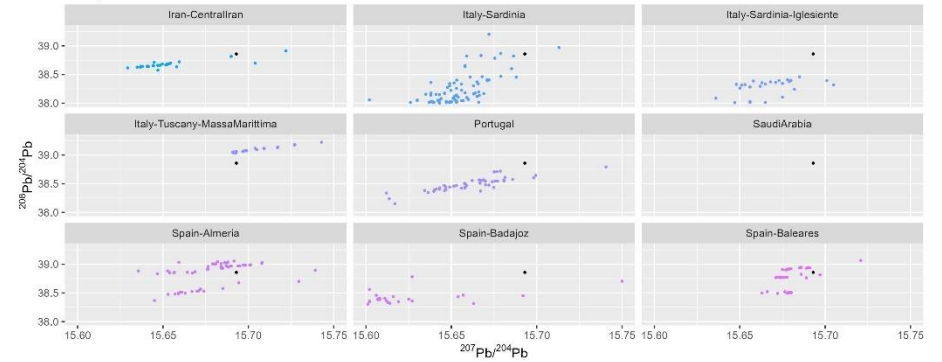

Sample MS018

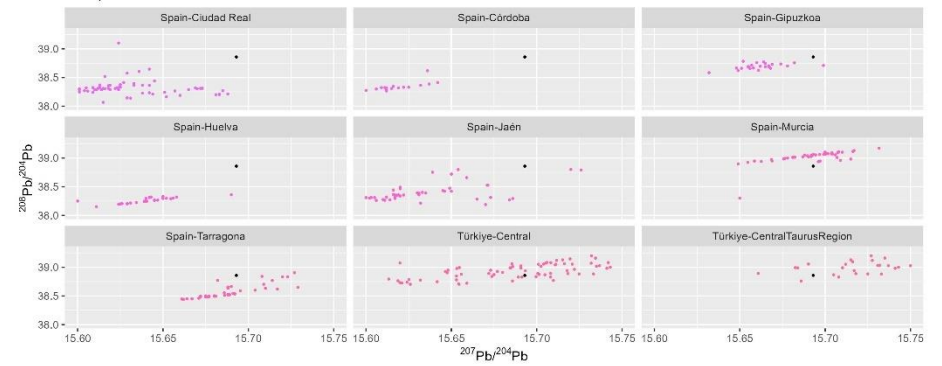

Sample MS018

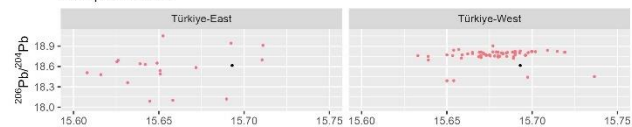 $^{207}\text{Pb}/^{204}\text{Pb}$ 

Sample MS019

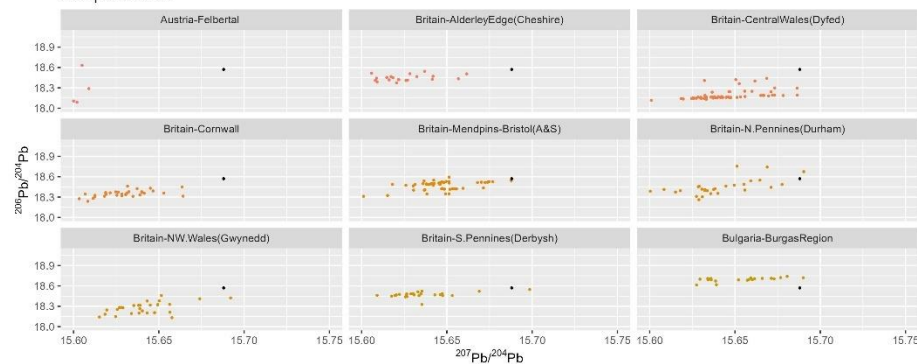 $^{207}\text{Pb}/^{204}\text{Pb}$ 

Sample MS019

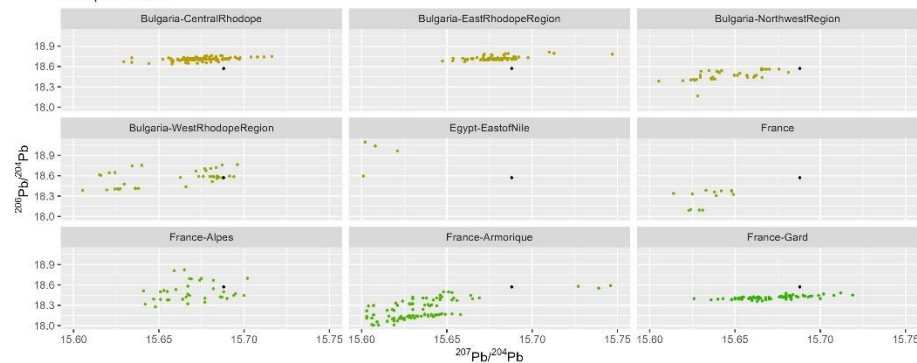 $^{207}\text{Pb}/^{204}\text{Pb}$ 

Sample MS018

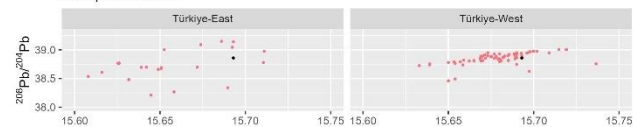 $^{207}\text{Pb}/^{204}\text{Pb}$ 

Sample MS019

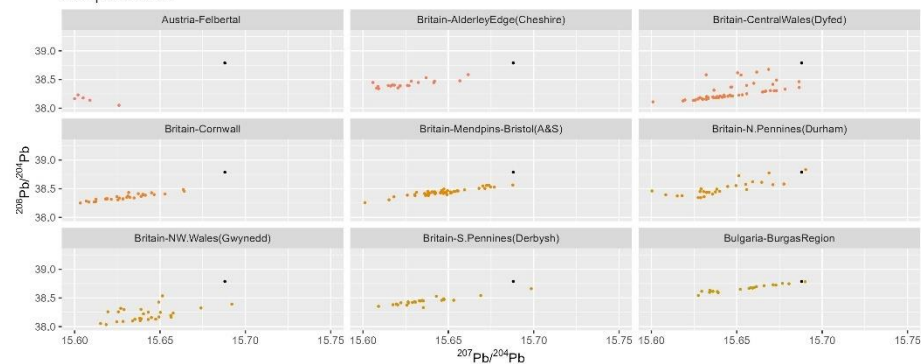 $^{207}\text{Pb}/^{204}\text{Pb}$ 

Sample MS019

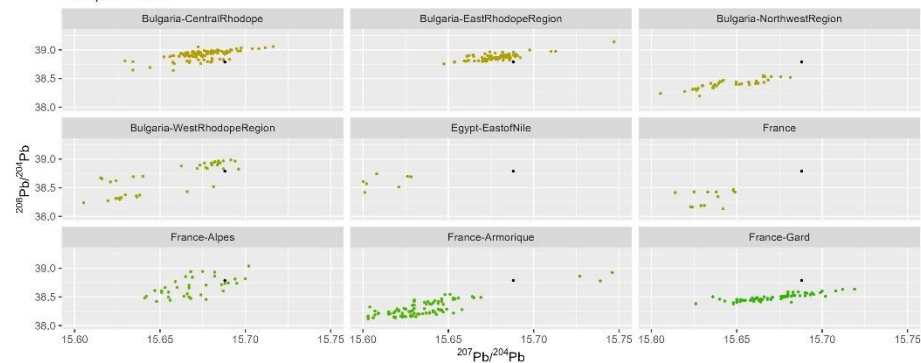 $^{207}\text{Pb}/^{204}\text{Pb}$

Sample MS019

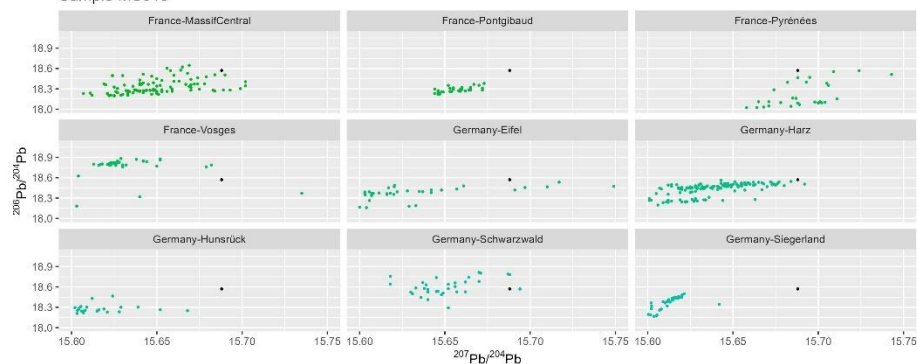

Sample MS019

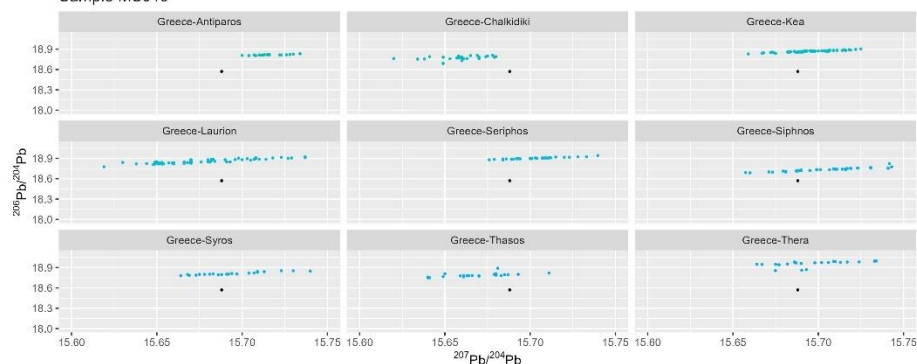

Sample MS019

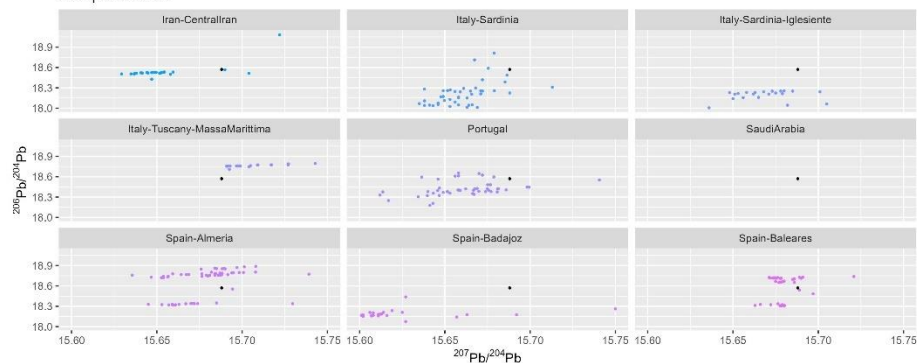

Sample MS019

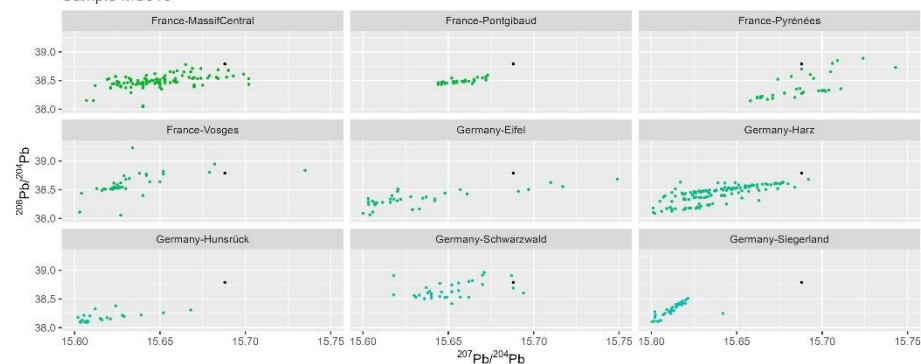

Sample MS019

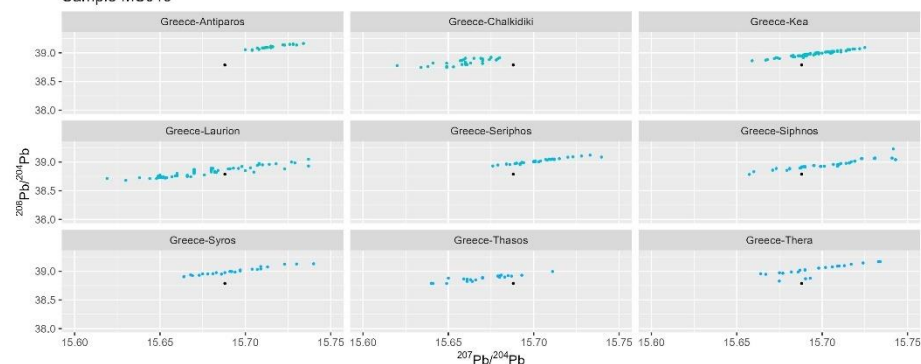

Sample MS019

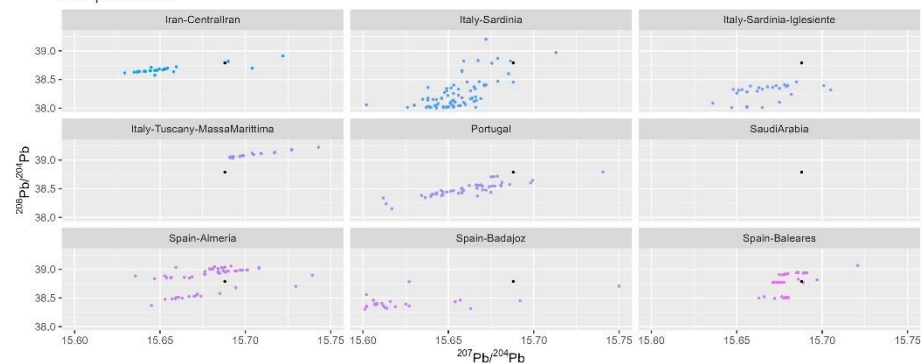

Sample MS019

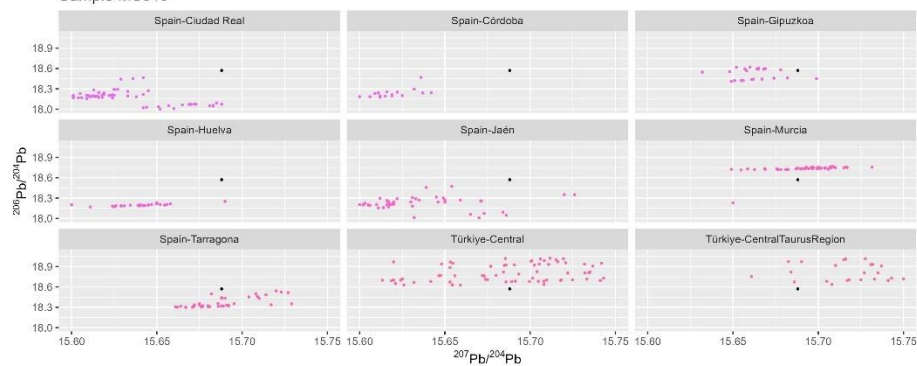

Sample MS019

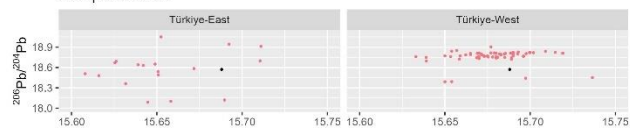 $^{207}\text{Pb}/^{204}\text{Pb}$ 

Sample MS020

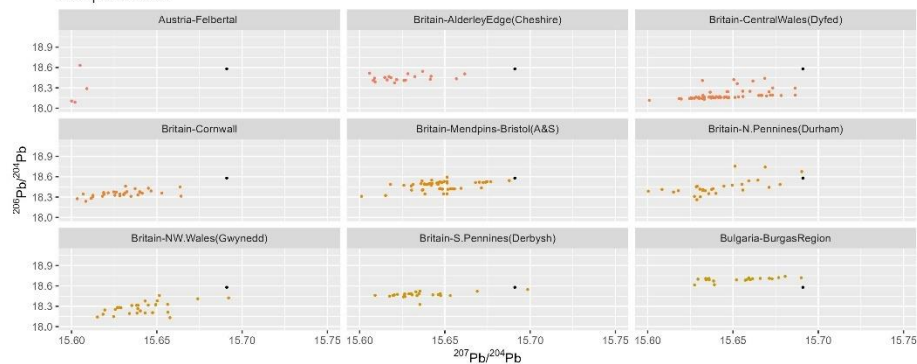 $^{207}\text{Pb}/^{204}\text{Pb}$ 

Sample MS019

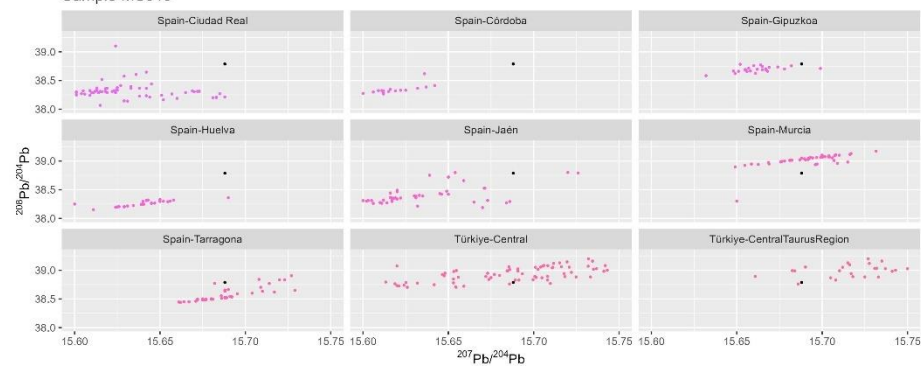

Sample MS019

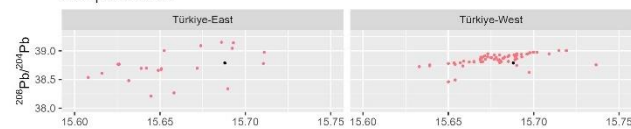 $^{207}\text{Pb}/^{204}\text{Pb}$ 

Sample MS020

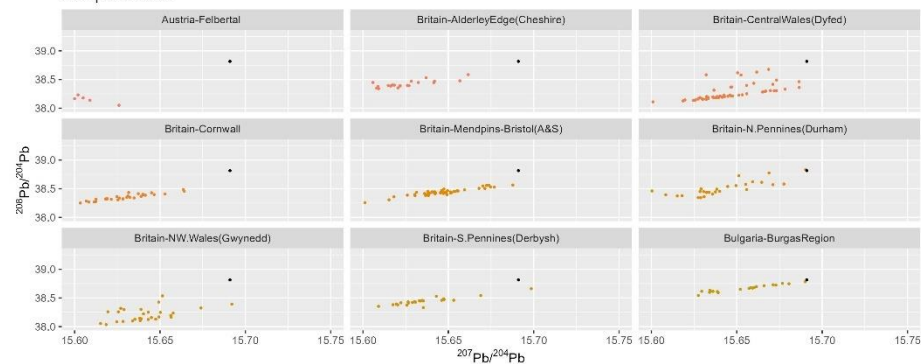 $^{207}\text{Pb}/^{204}\text{Pb}$



Sample MS020

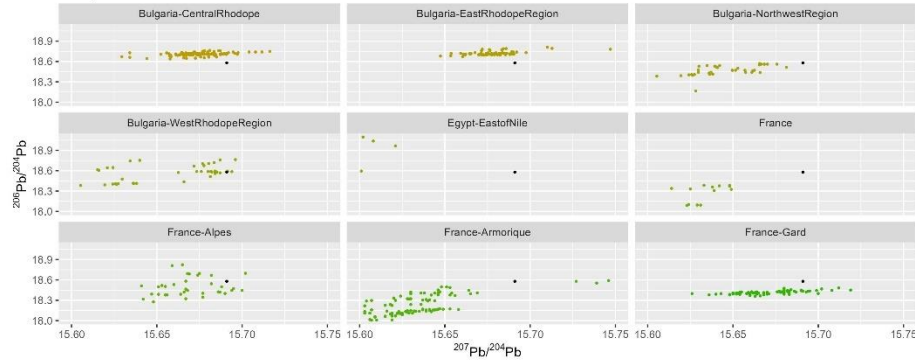

Sample MS020

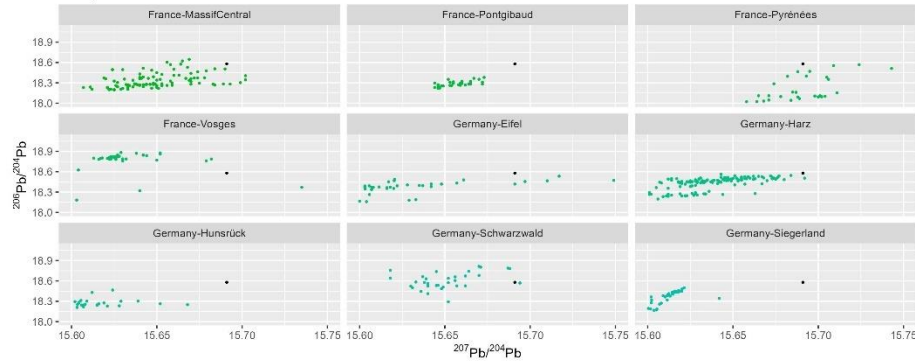

Sample MS020

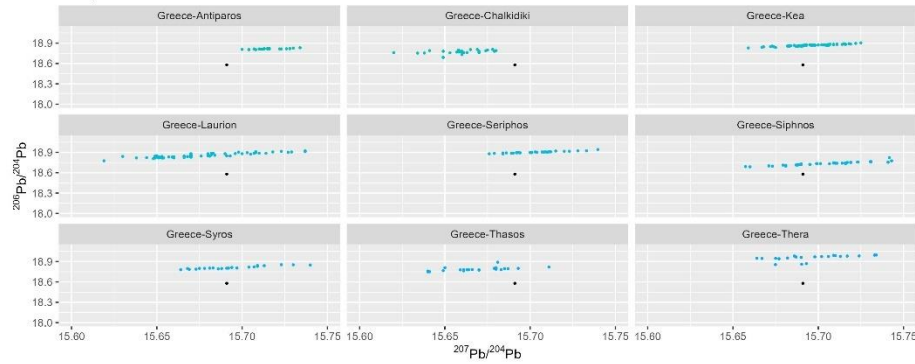

Sample MS020

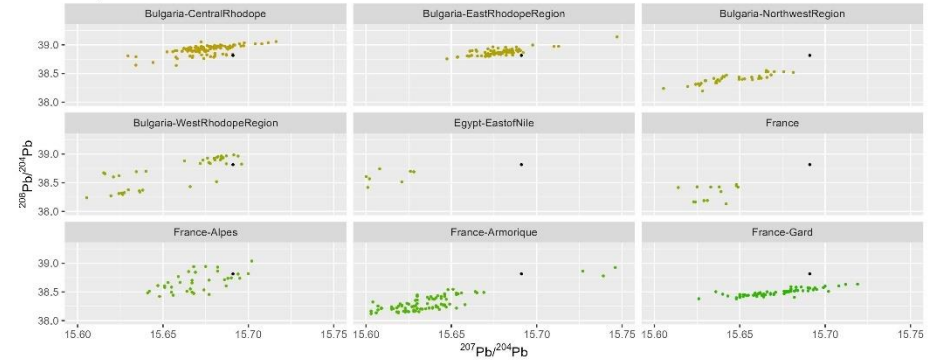

Sample MS020

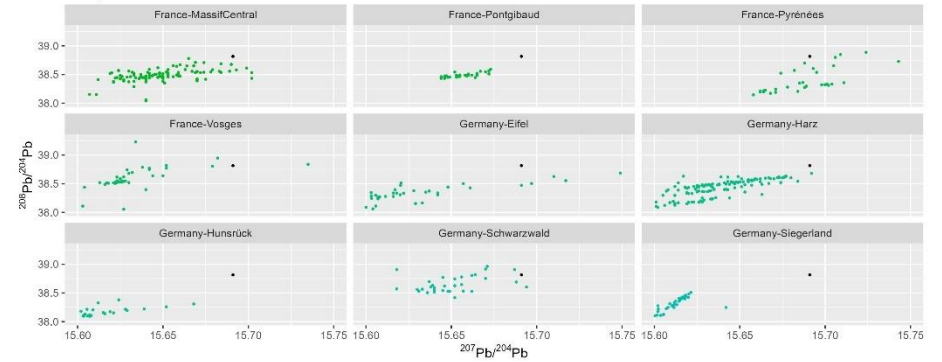

Sample MS020

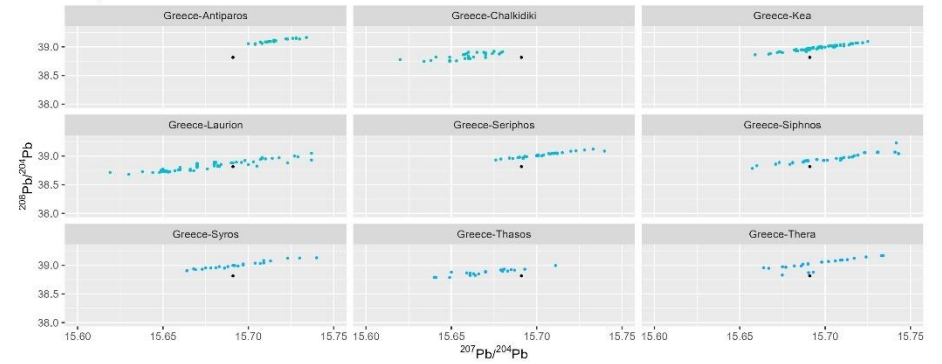



Sample MS020

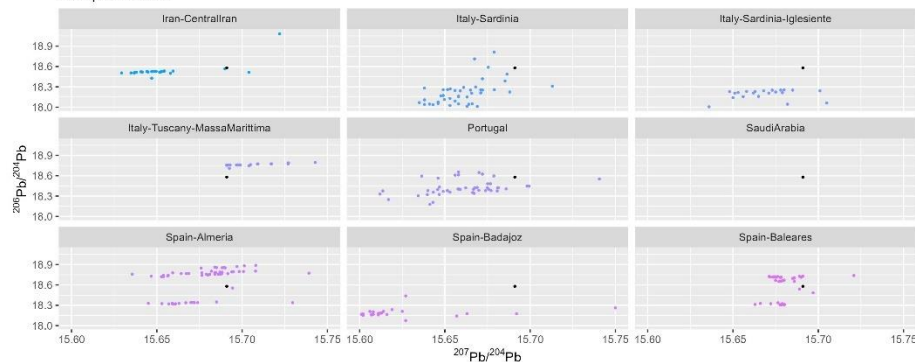

Sample MS020

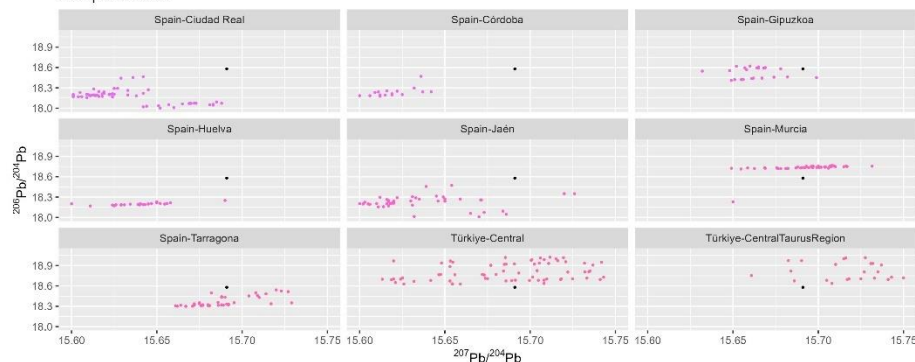

Sample MS020

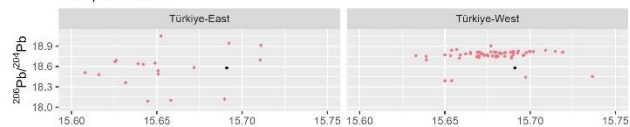

$^{207}\text{Pb}/^{204}\text{Pb}$

Sample MS020

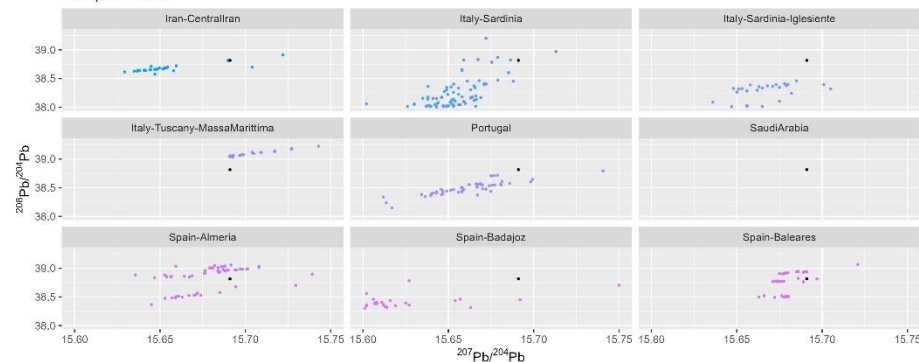

Sample MS020

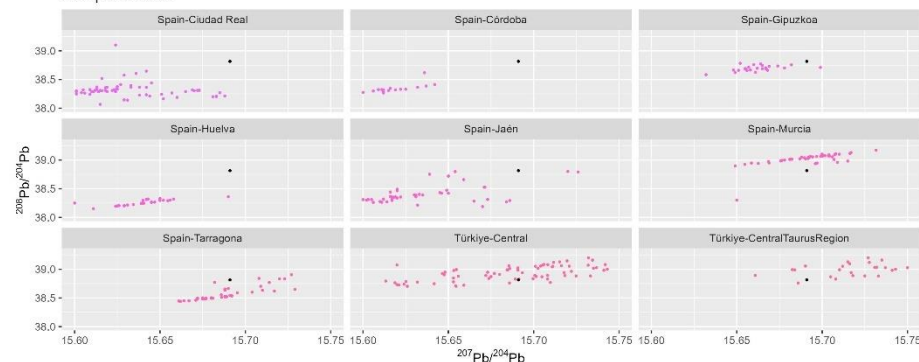

Sample MS020

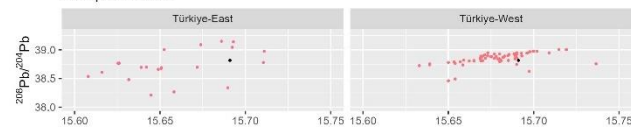

$^{207}\text{Pb}/^{204}\text{Pb}$

Sample MS021

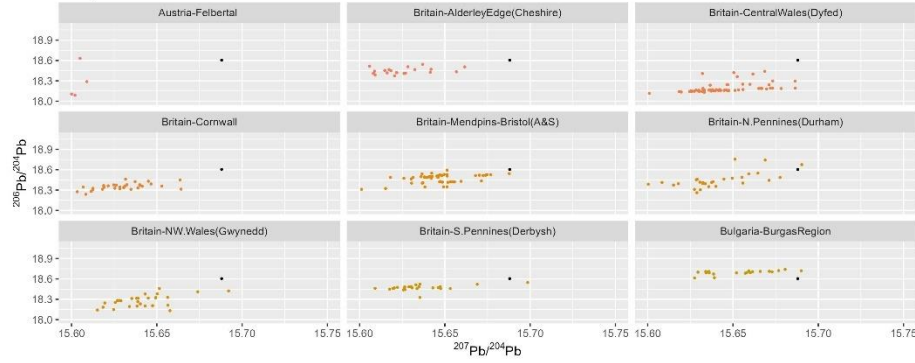

Sample MS021

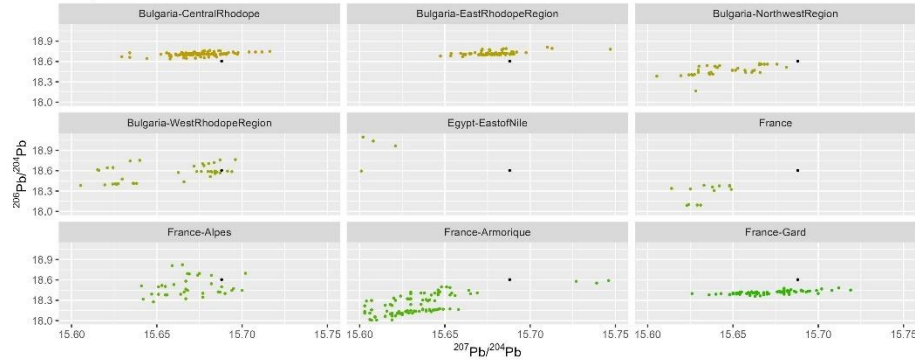

Sample MS021

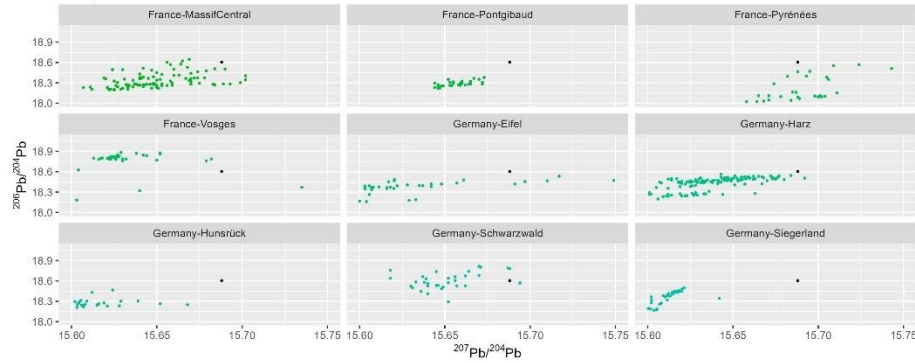

Sample MS021

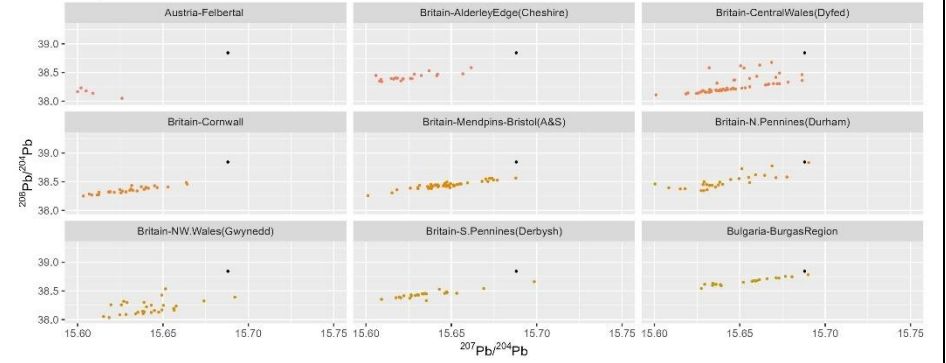

Sample MS021

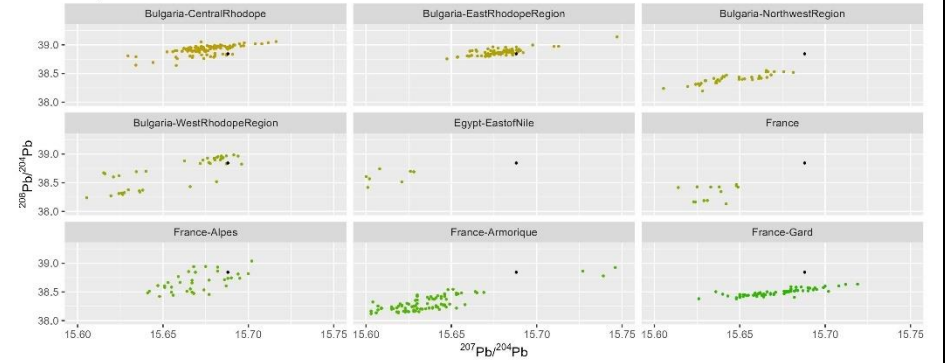

Sample MS021

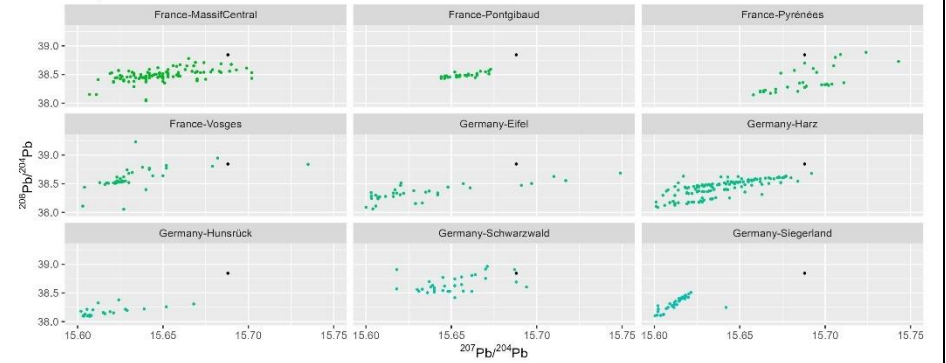

Sample MS021

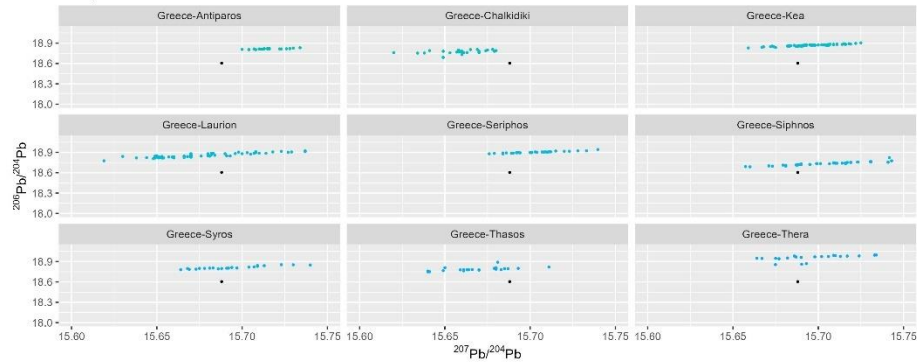

Sample MS021

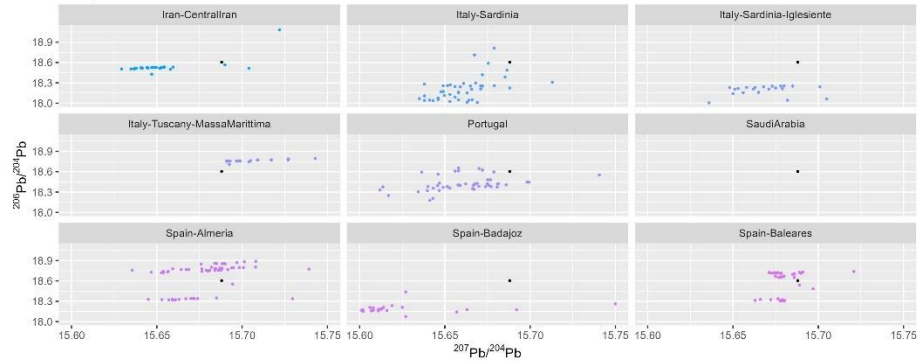

Sample MS021

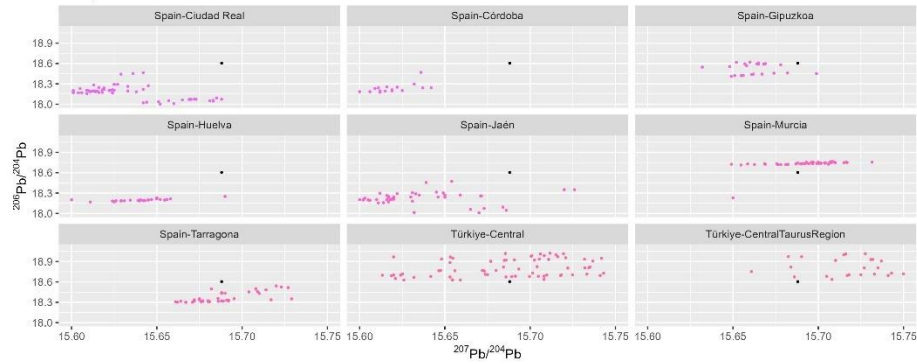

Sample MS021

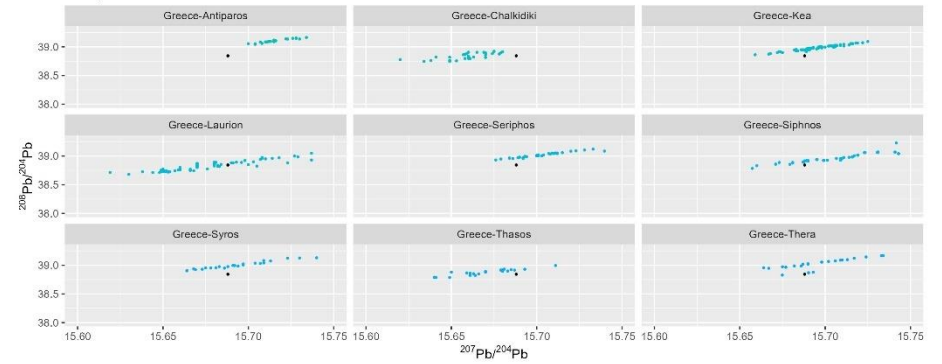

Sample MS021

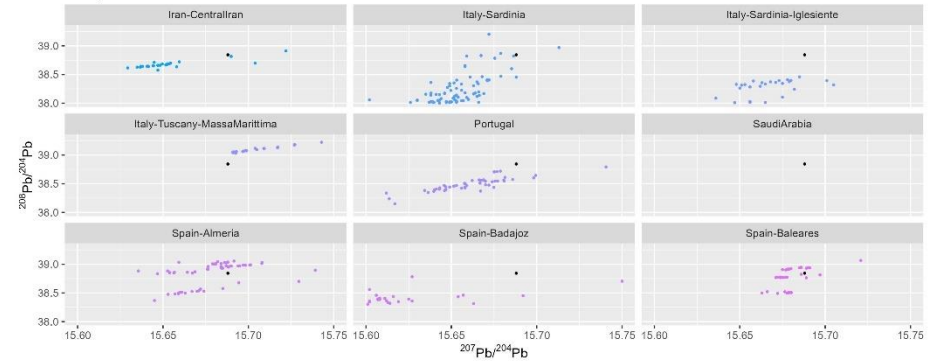

Sample MS021

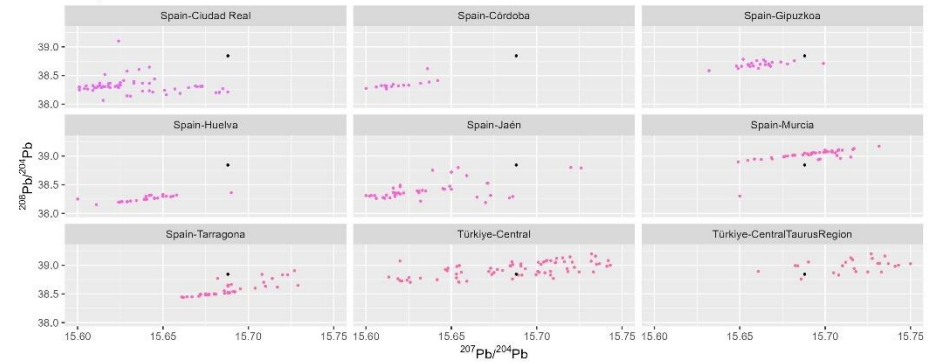

Sample MS021

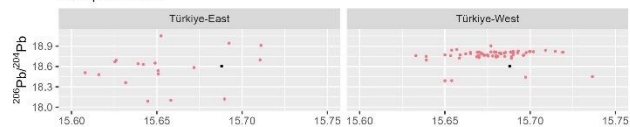 $^{207}\text{Pb}/^{204}\text{Pb}$ 

Sample MS022

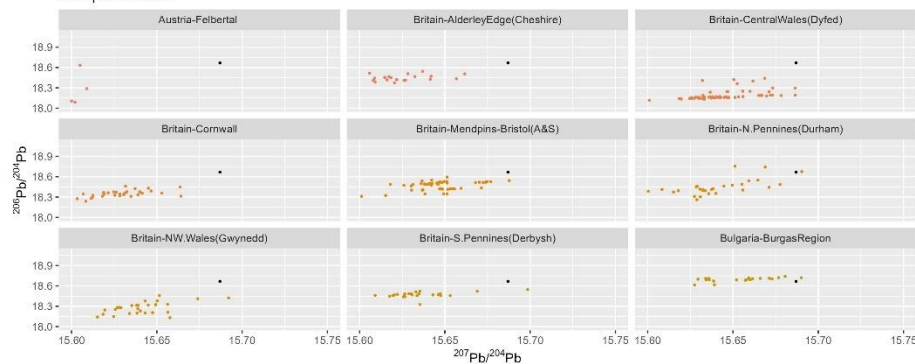 $^{207}\text{Pb}/^{204}\text{Pb}$ 

Sample MS022

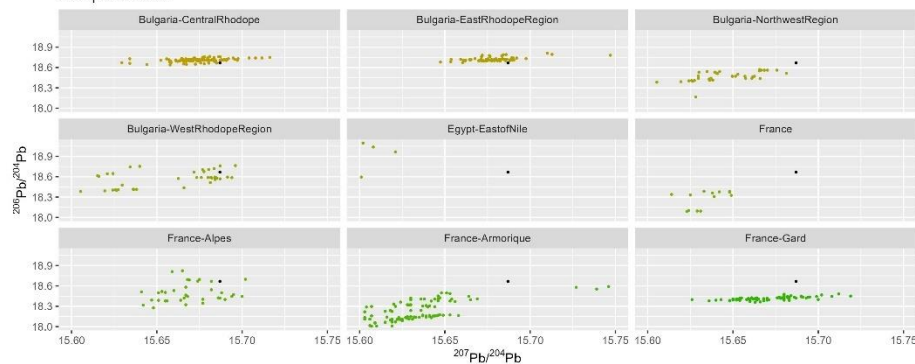 $^{207}\text{Pb}/^{204}\text{Pb}$ 

Sample MS021

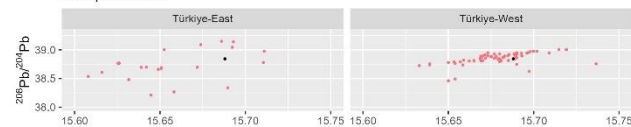 $^{207}\text{Pb}/^{204}\text{Pb}$ 

Sample MS022

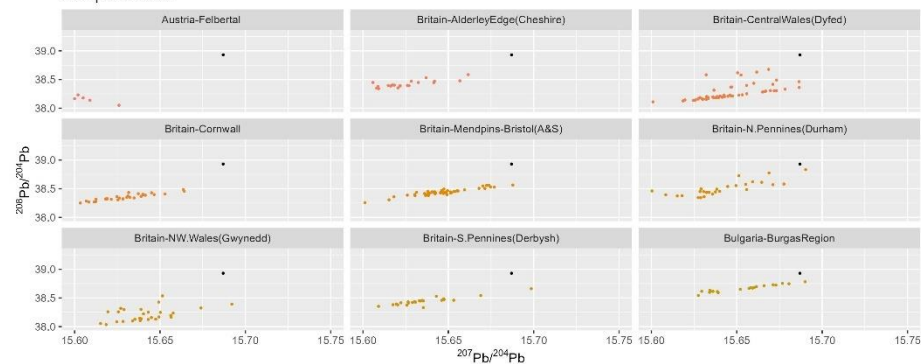 $^{207}\text{Pb}/^{204}\text{Pb}$ 

Sample MS022

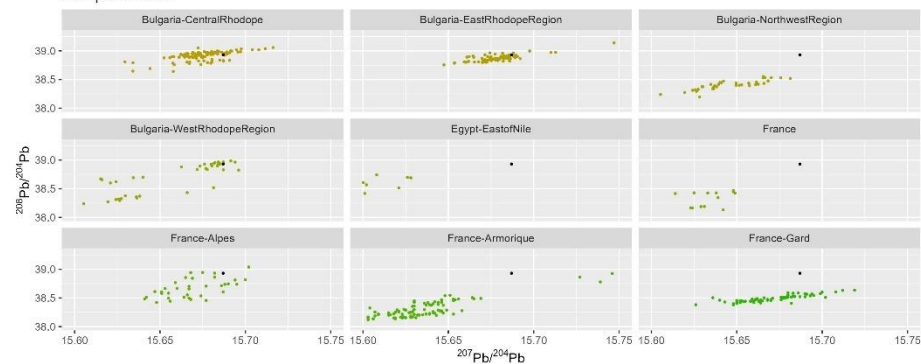 $^{207}\text{Pb}/^{204}\text{Pb}$



Sample MS022

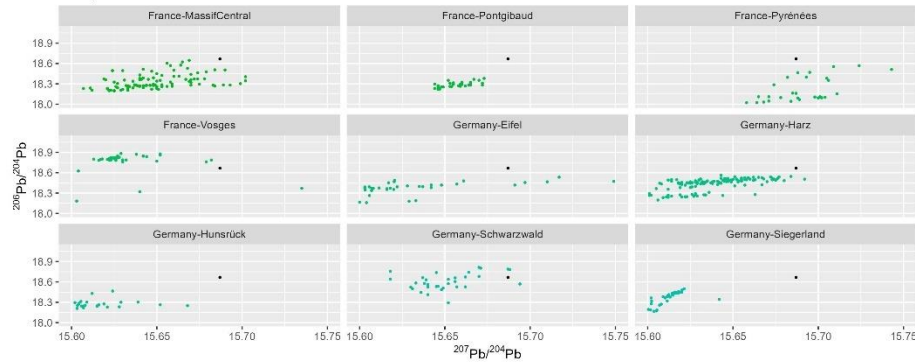

Sample MS022

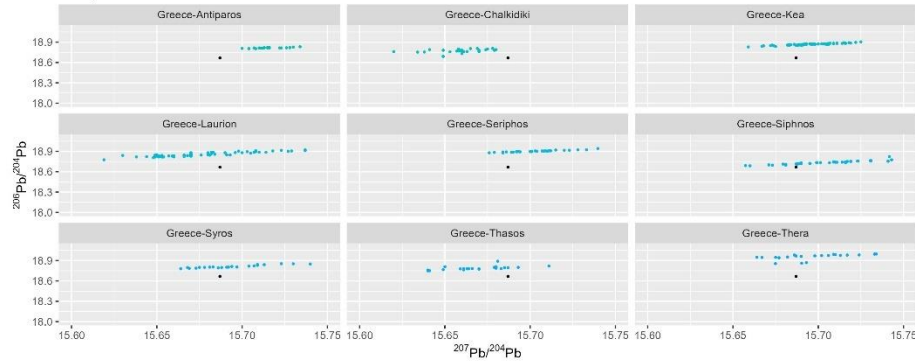

Sample MS022

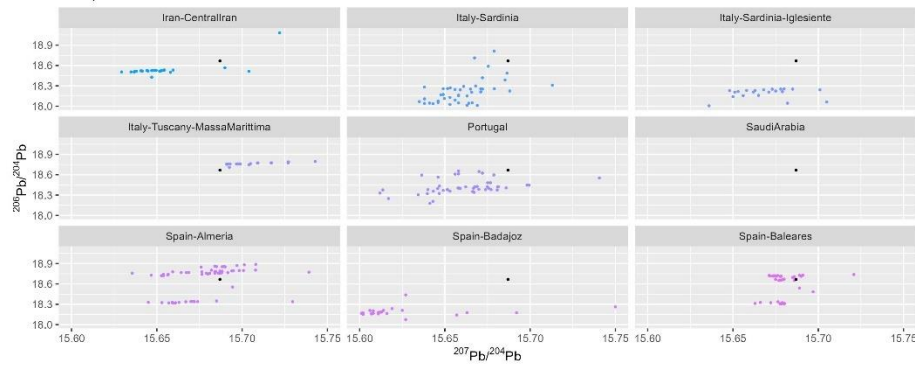

Sample MS022

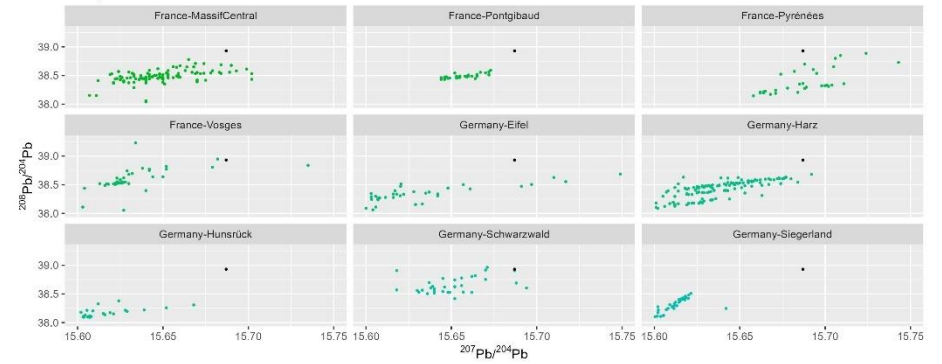

Sample MS022

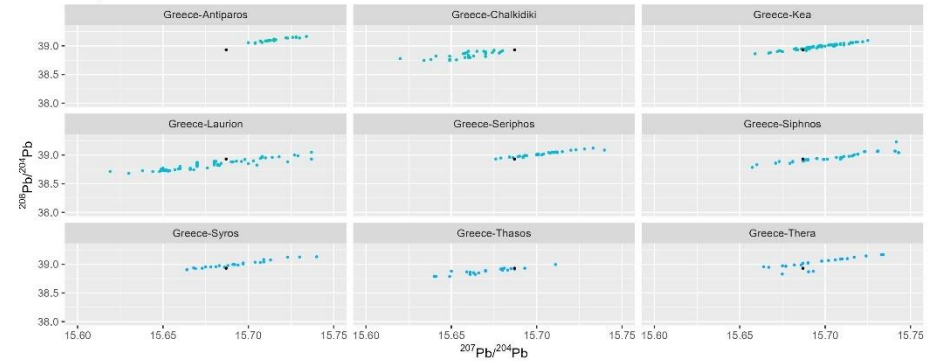

Sample MS022

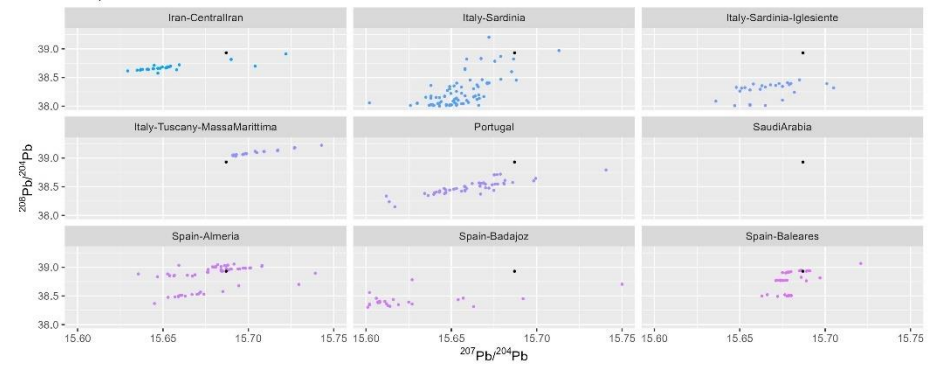



Sample MS022

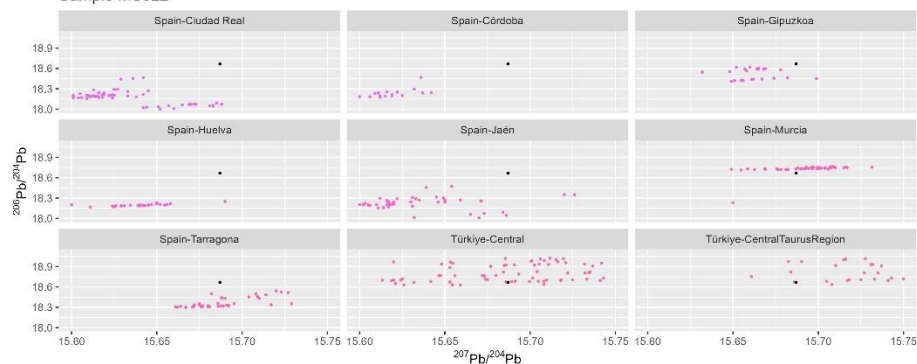

Sample MS022

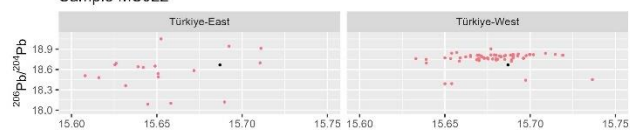 $^{207}\text{Pb}/^{204}\text{Pb}$ 

Sample MS023

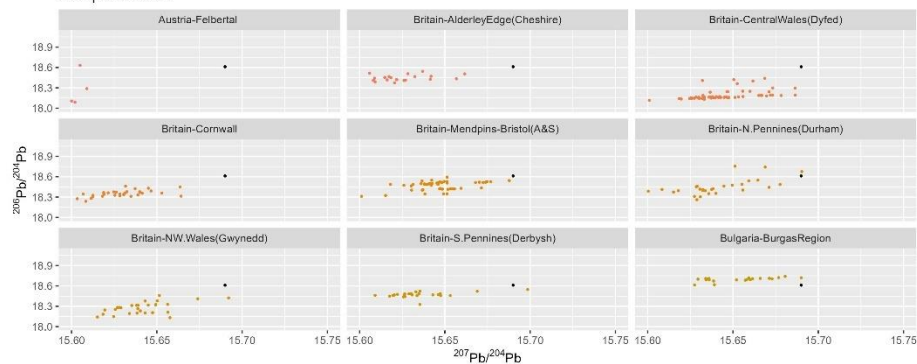

Sample MS022

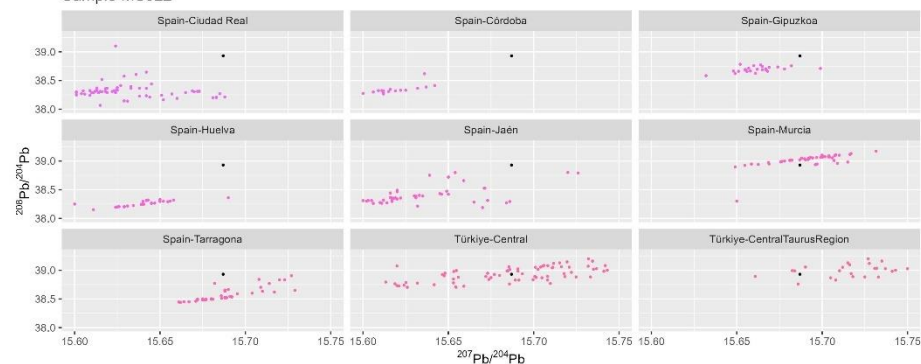

Sample MS022

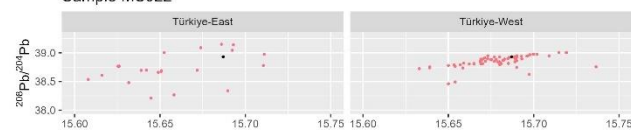 $^{207}\text{Pb}/^{204}\text{Pb}$ 

Sample MS023

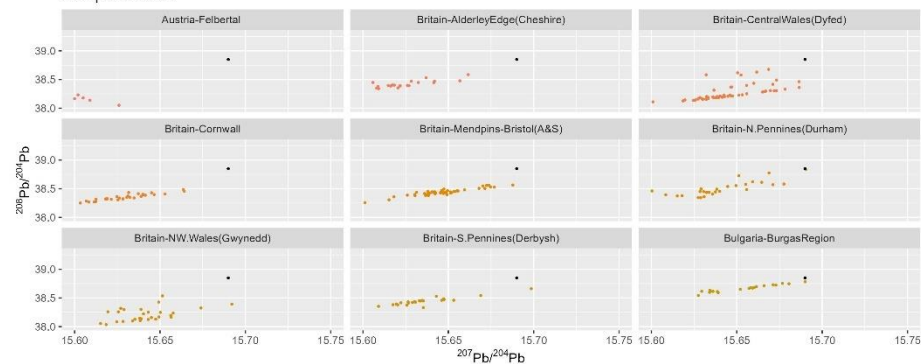

Sample MS023

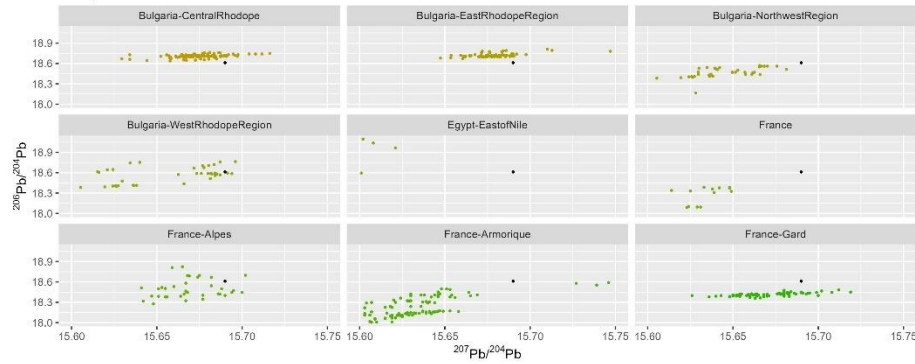

Sample MS023

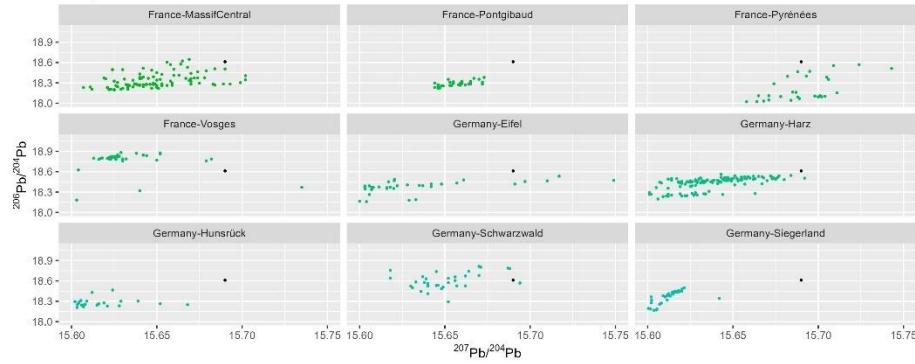

Sample MS023

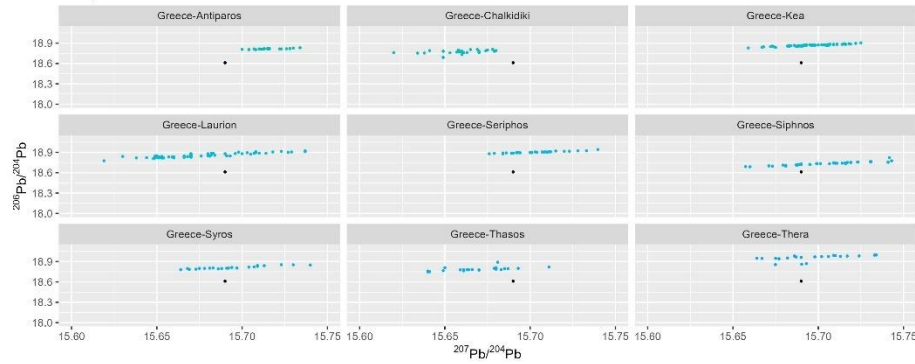

Sample MS023

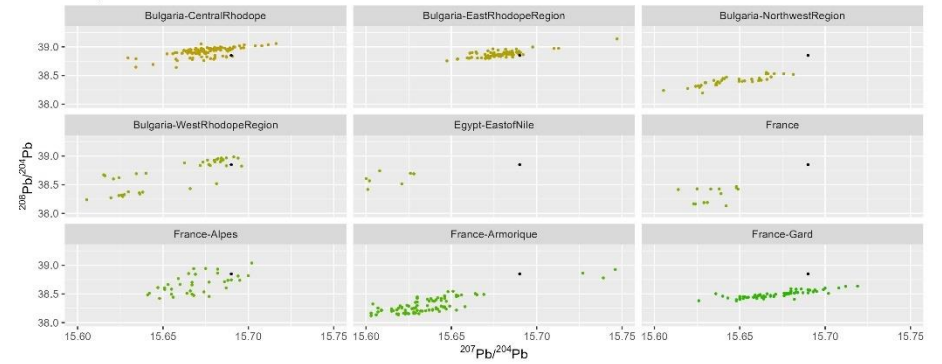

Sample MS023

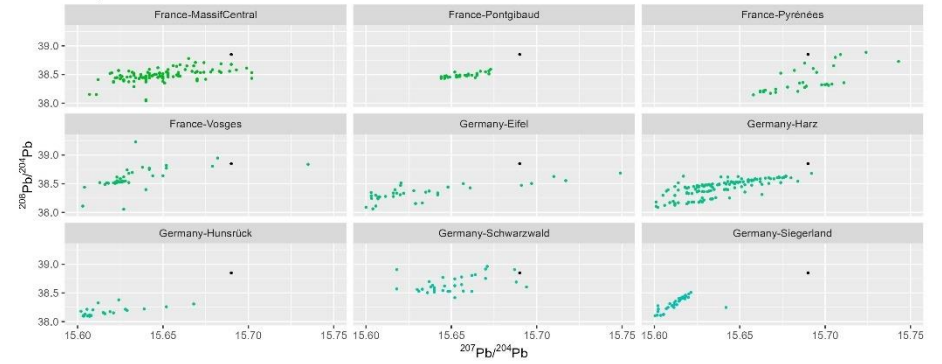

Sample MS023

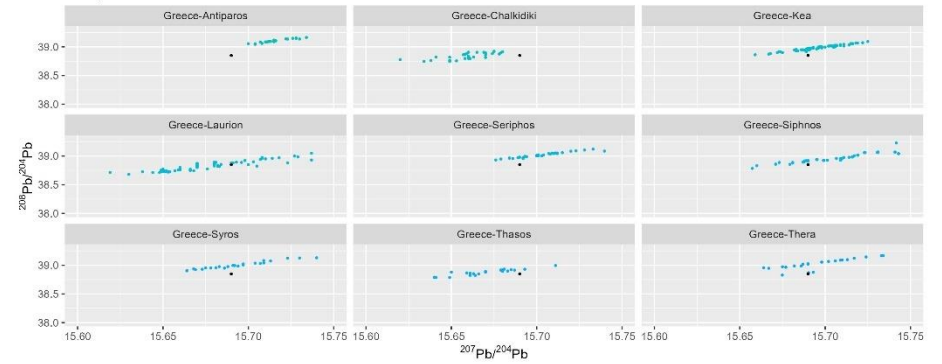

Sample MS023

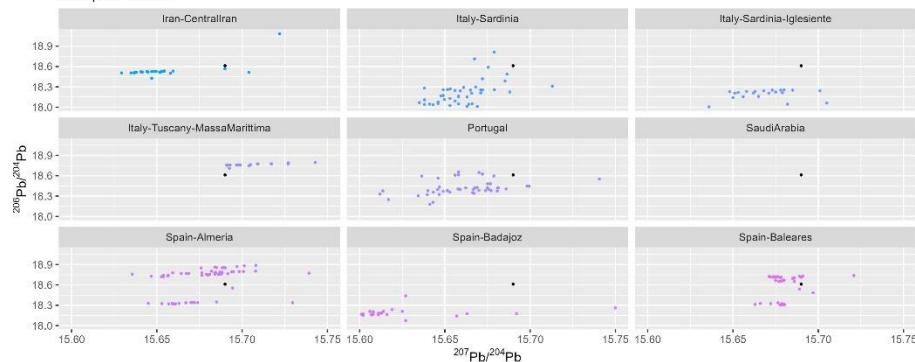

Sample MS023

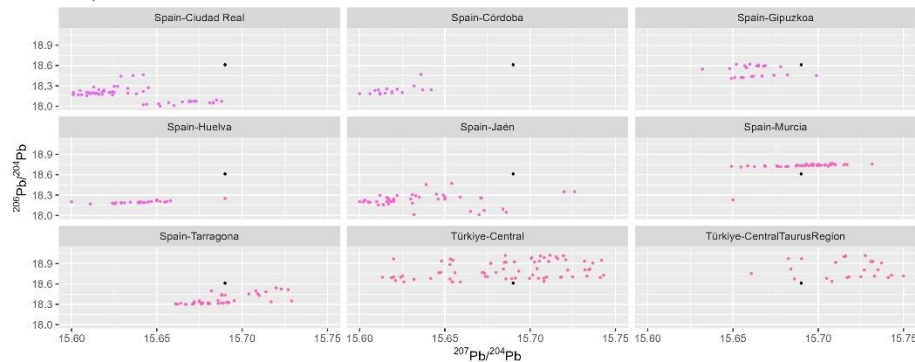

Sample MS023

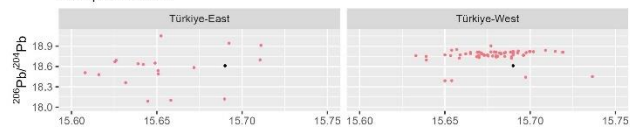

$^{207}\text{Pb}/^{204}\text{Pb}$

Sample MS023

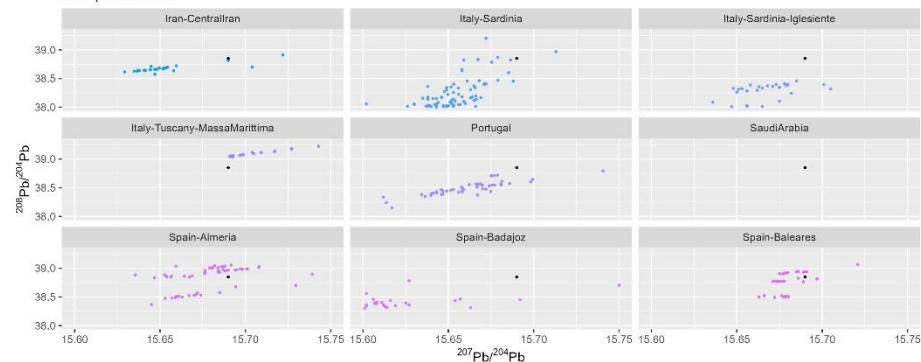

Sample MS023

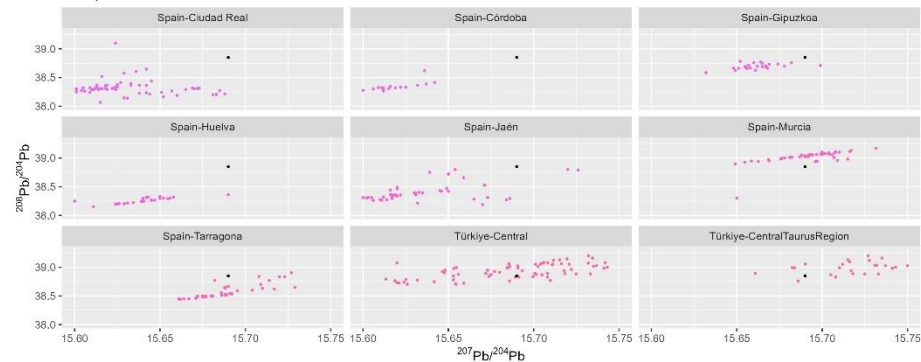

Sample MS023

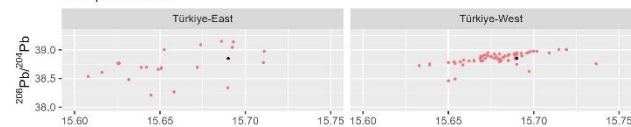

$^{207}\text{Pb}/^{204}\text{Pb}$

Sample MS024

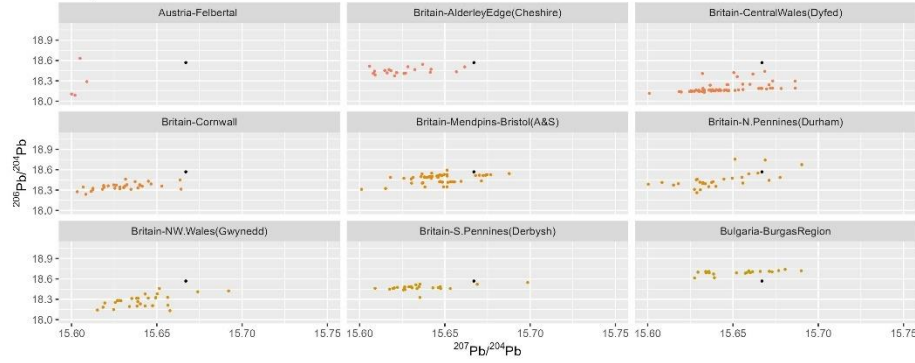

Sample MS024

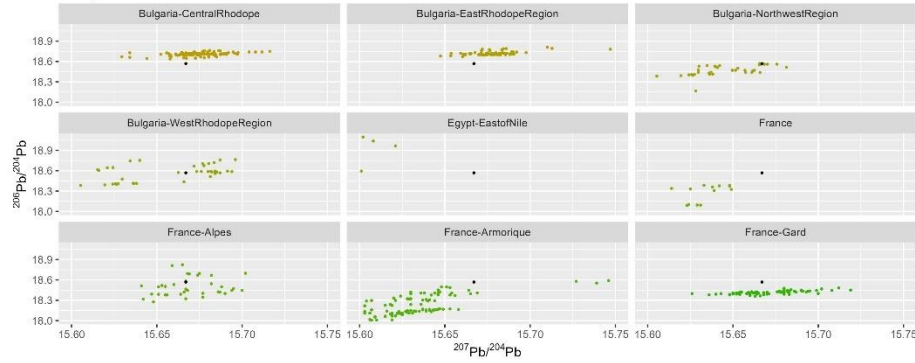

Sample MS024

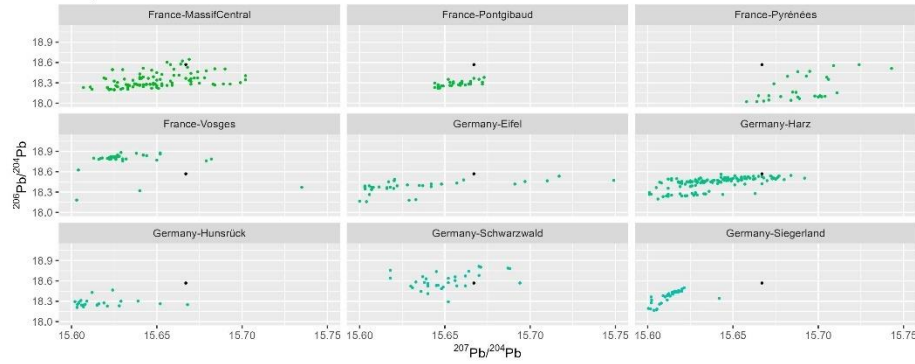

Sample MS024

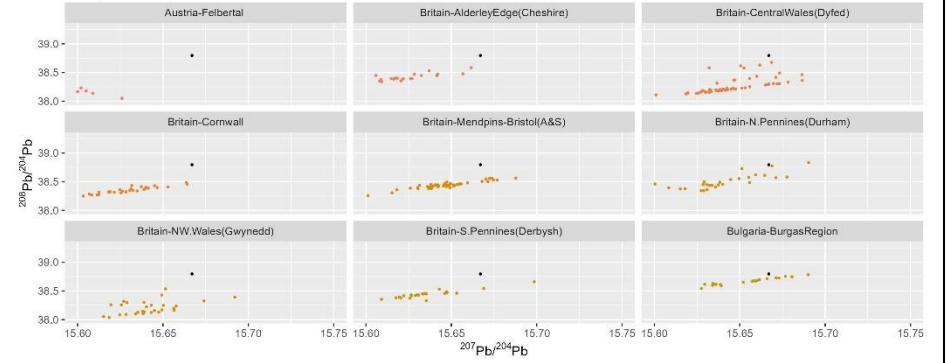

Sample MS024

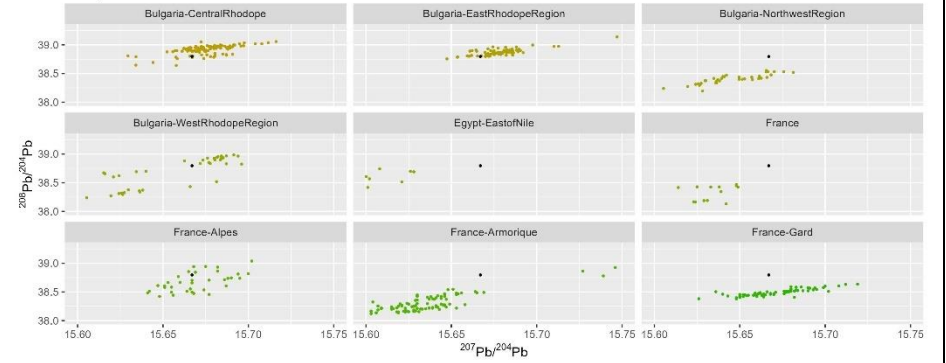

Sample MS024

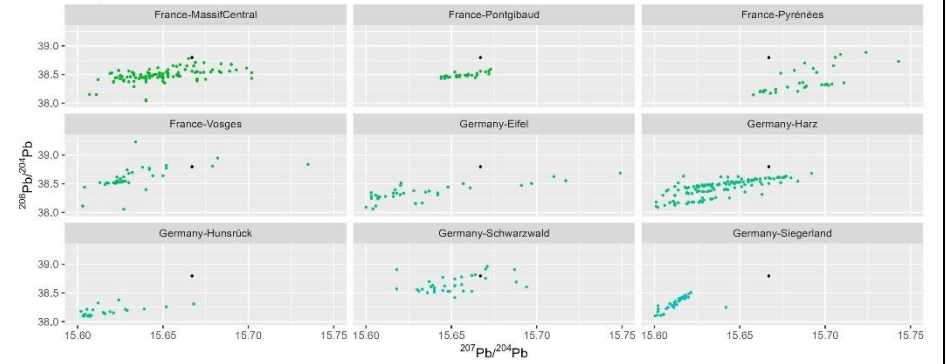



Sample MS024

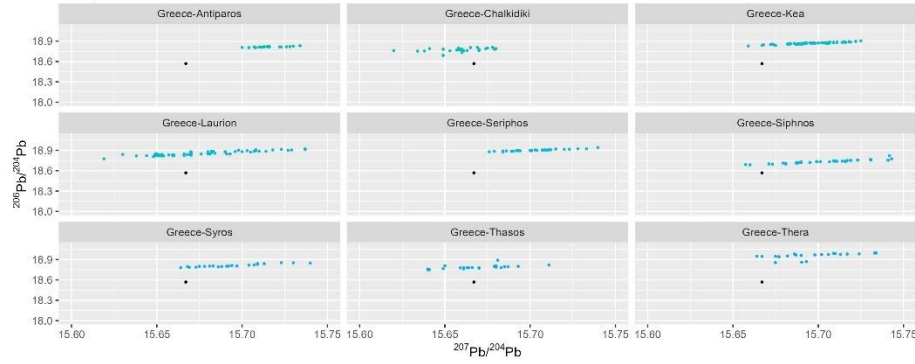

Sample MS024

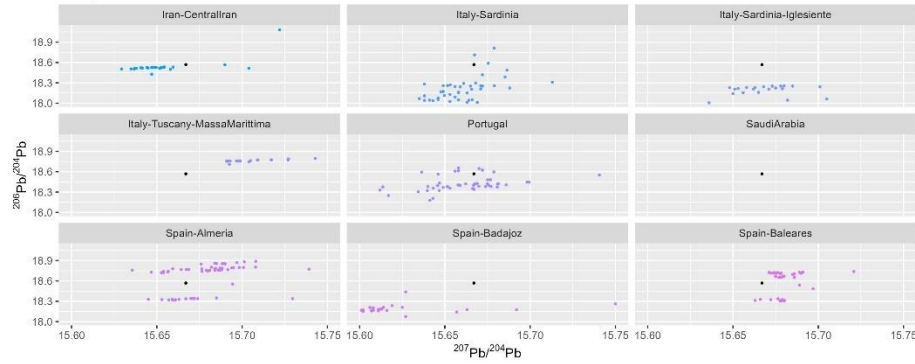

Sample MS024

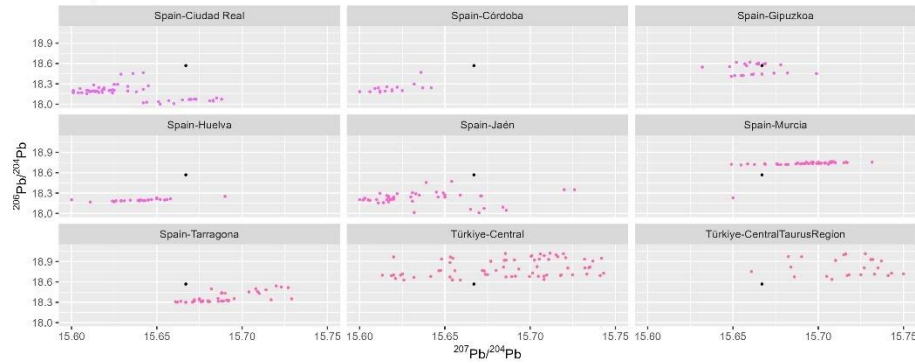

Sample MS024

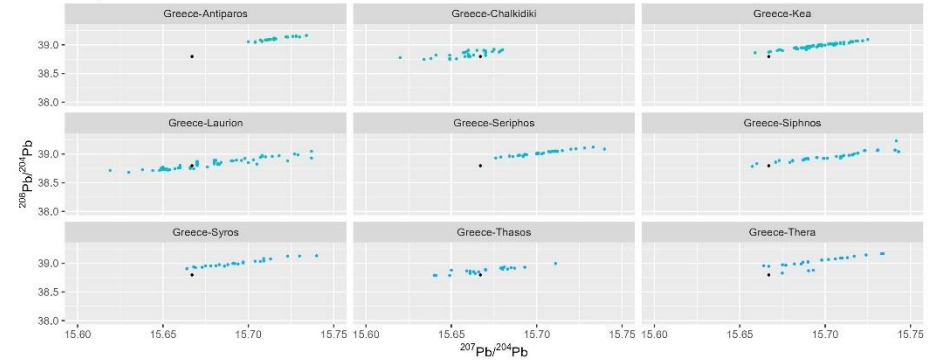

Sample MS024

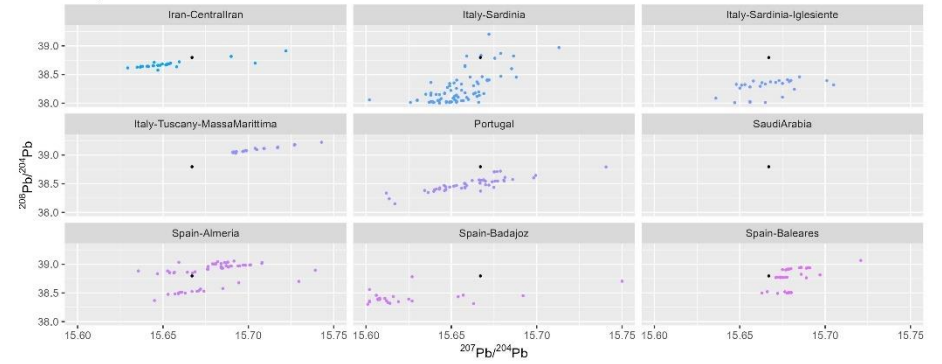

Sample MS024

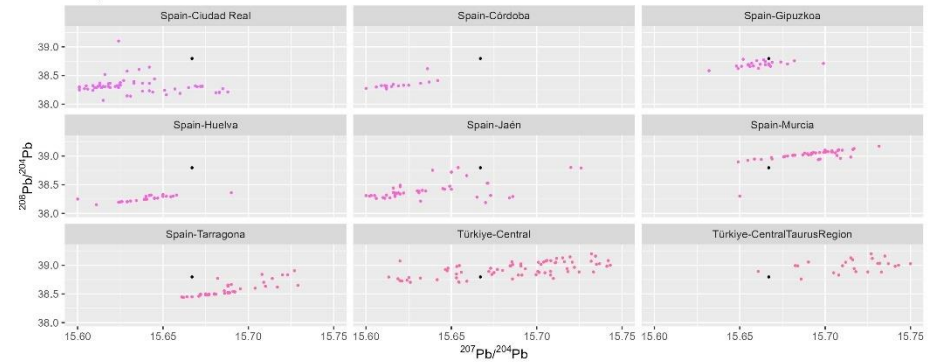



Sample MS024

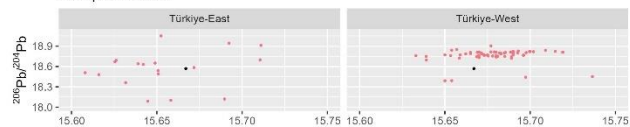

Sample MS024

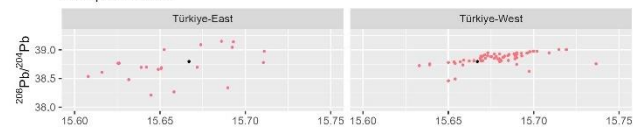

Sample MS025

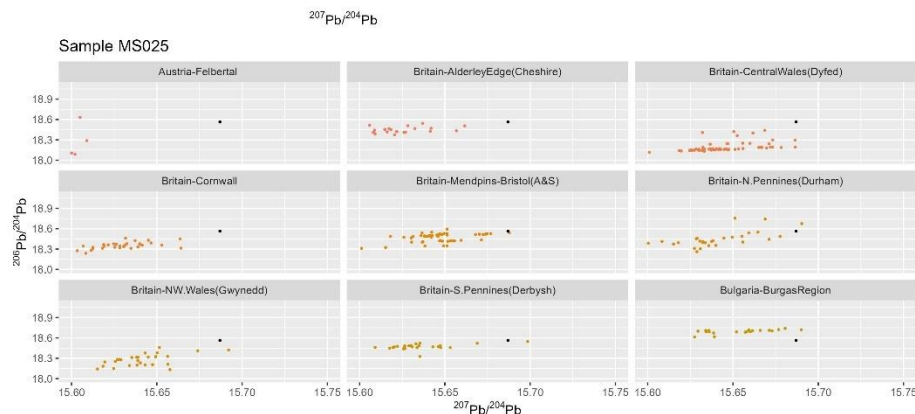

Sample MS025

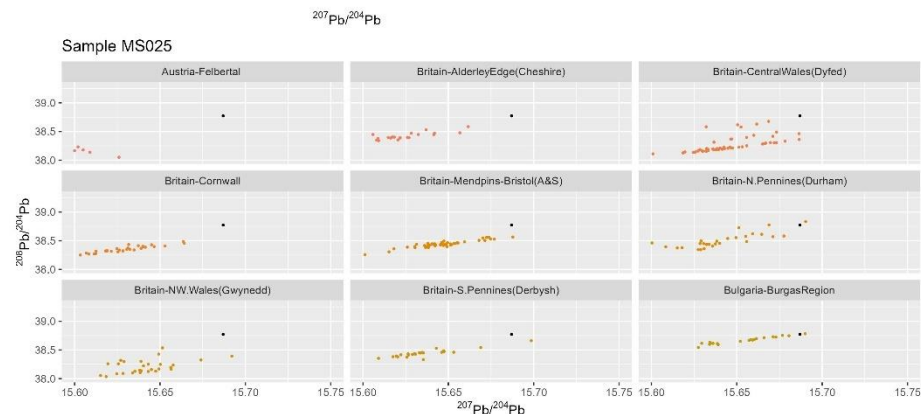

Sample MS025

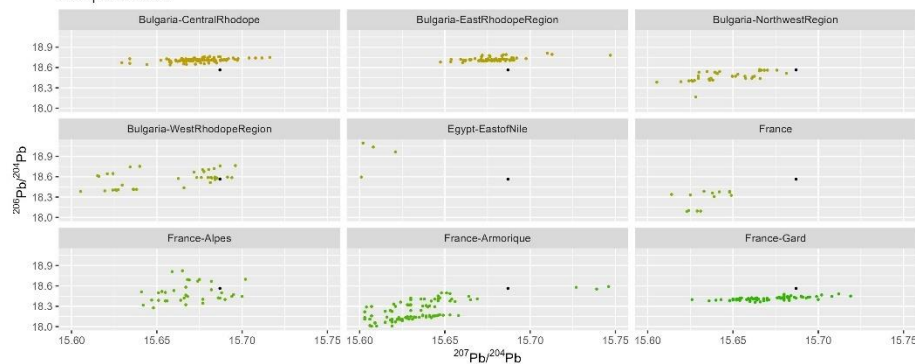

Sample MS025

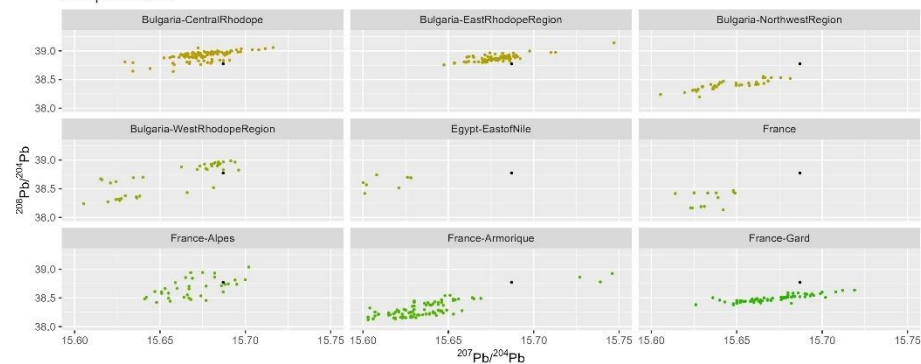

Sample MS025

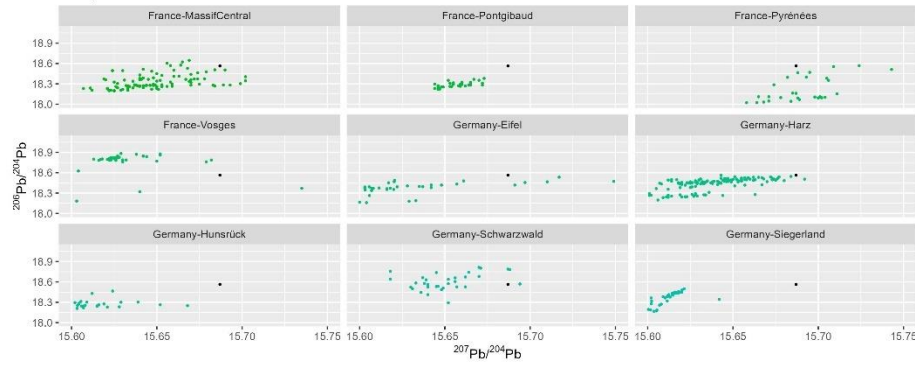

Sample MS025

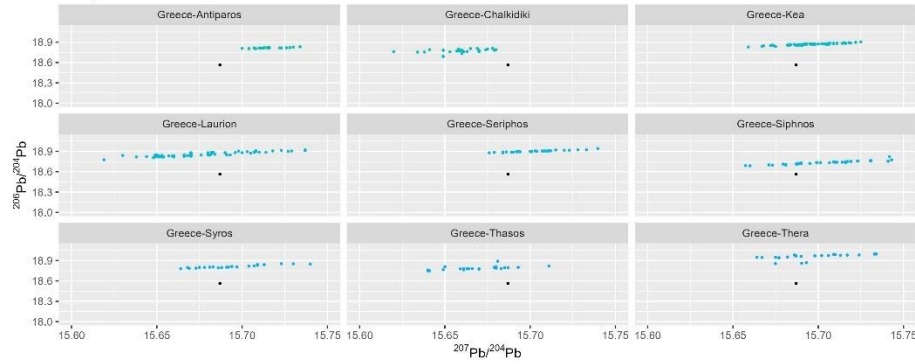

Sample MS025

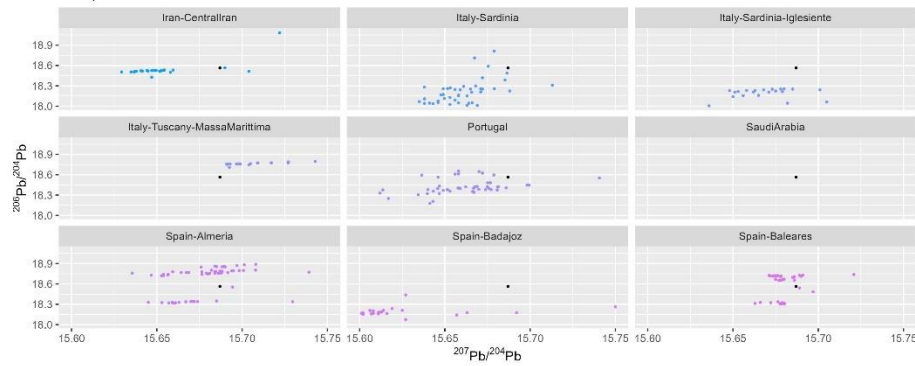

Sample MS025

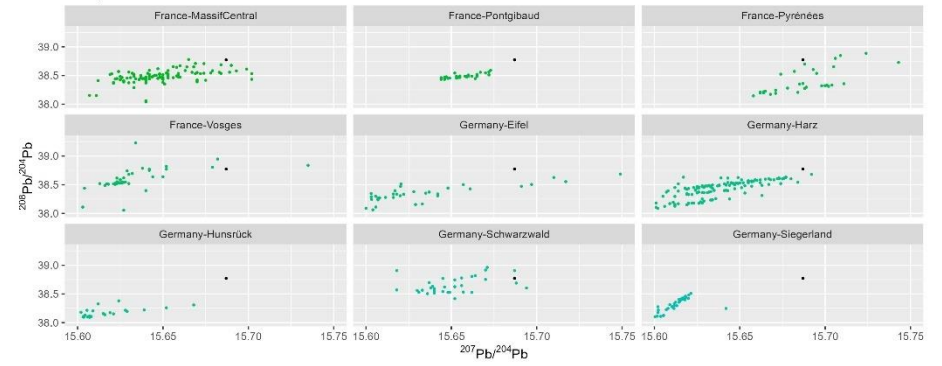

Sample MS025

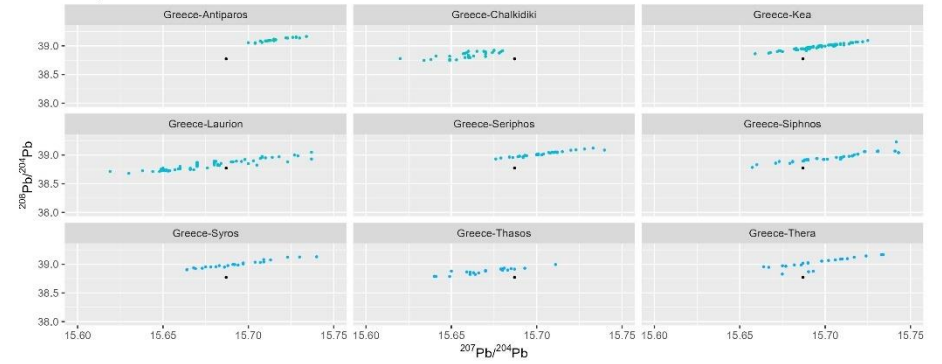

Sample MS025

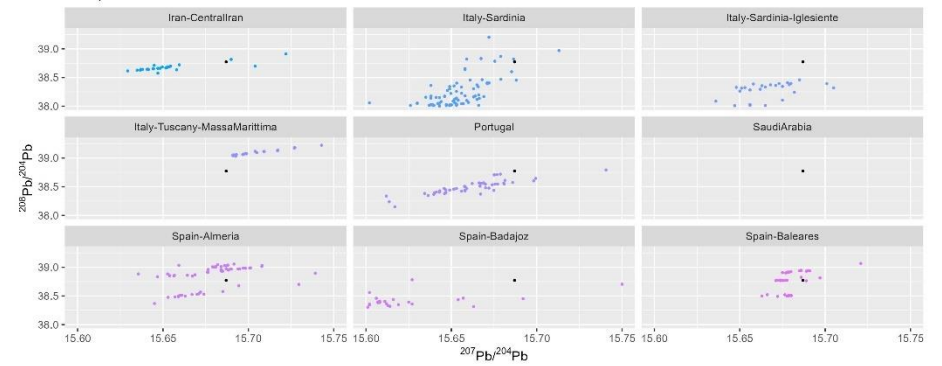

Sample MS025

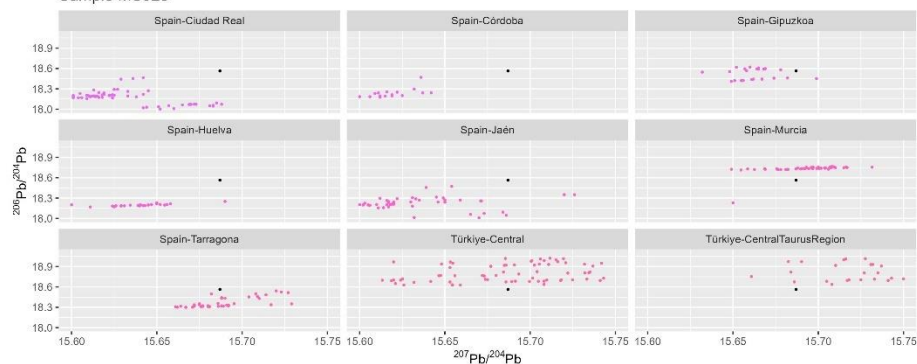

Sample MS025

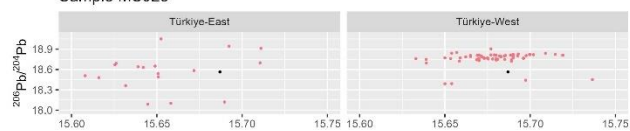 $^{207}\text{Pb}/^{204}\text{Pb}$ 

Sample MS026

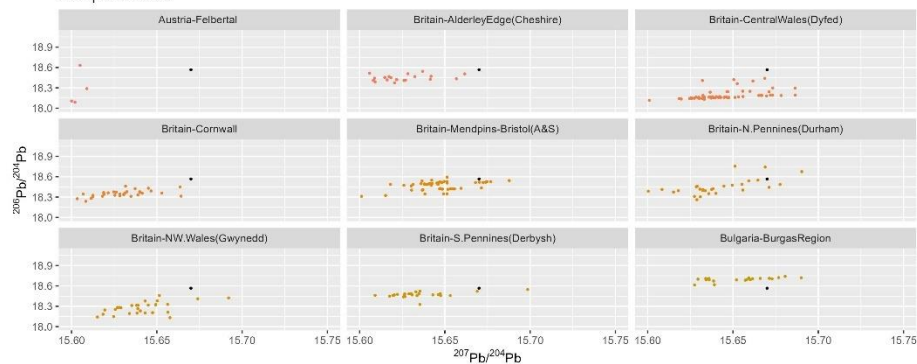

Sample MS025

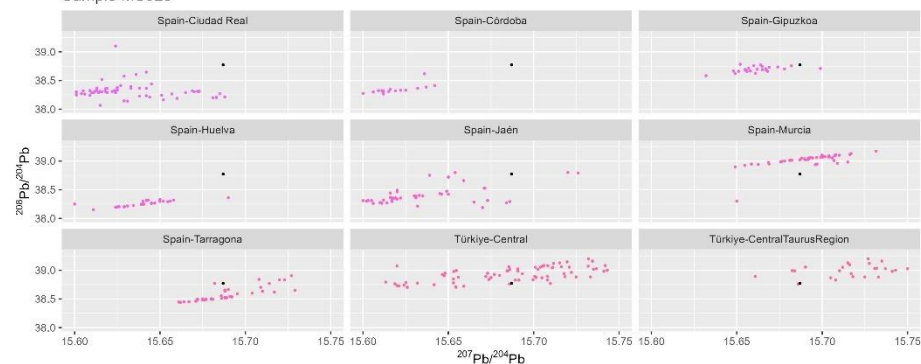

Sample MS025

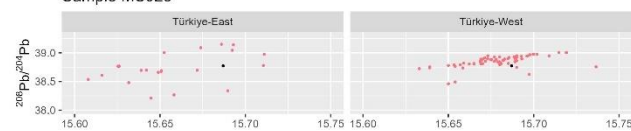 $^{207}\text{Pb}/^{204}\text{Pb}$ 

Sample MS026

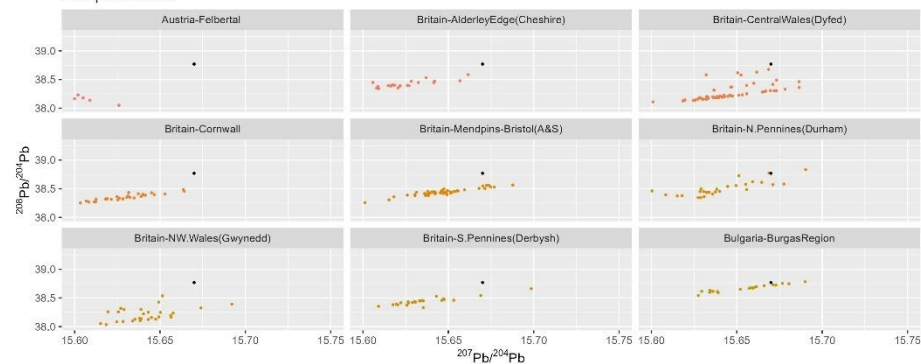

Sample MS026

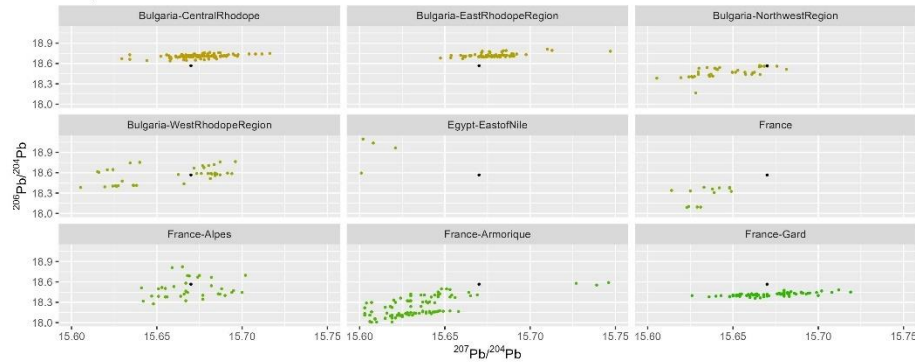

Sample MS026

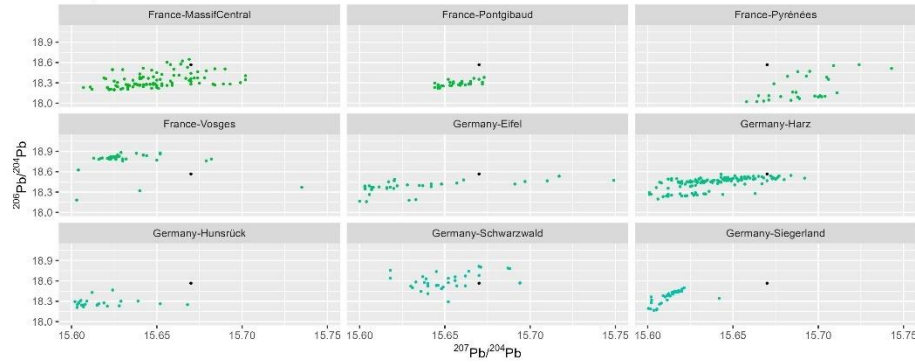

Sample MS026

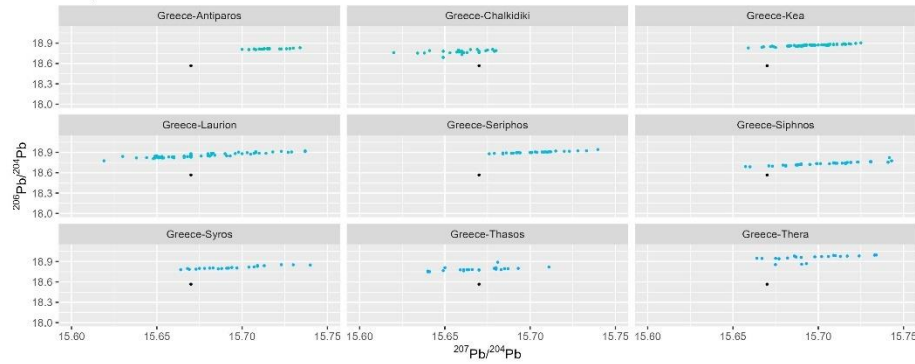

Sample MS026

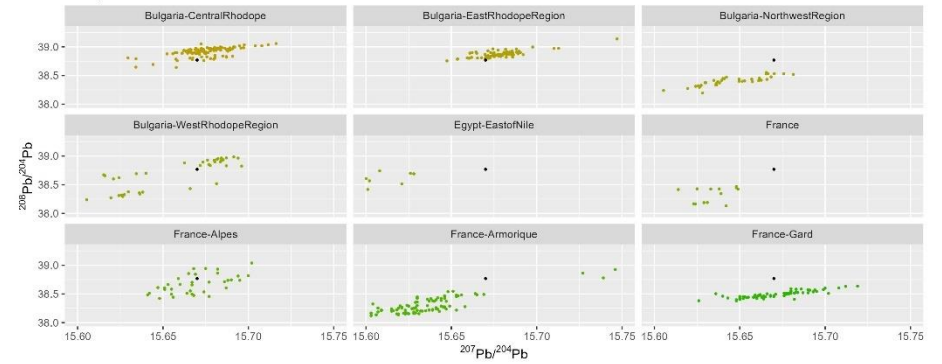

Sample MS026

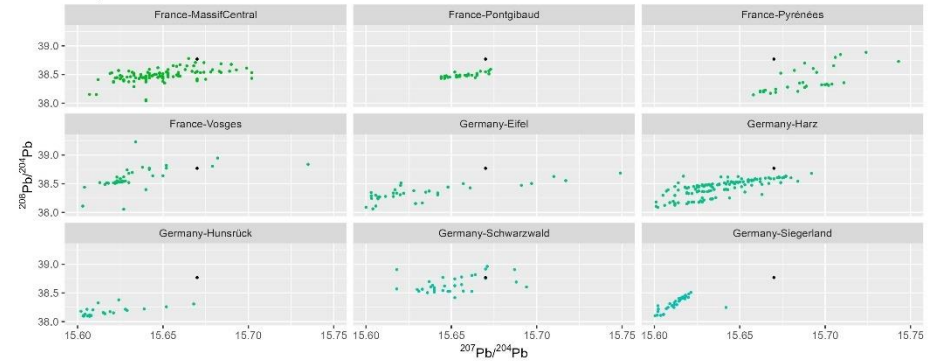

Sample MS026

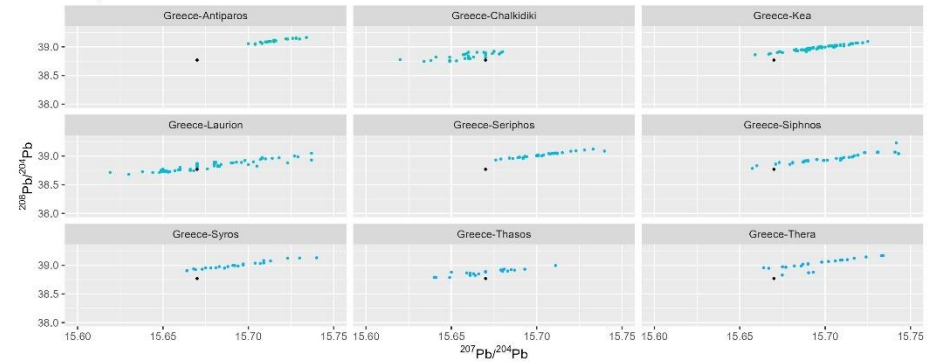

Sample MS026

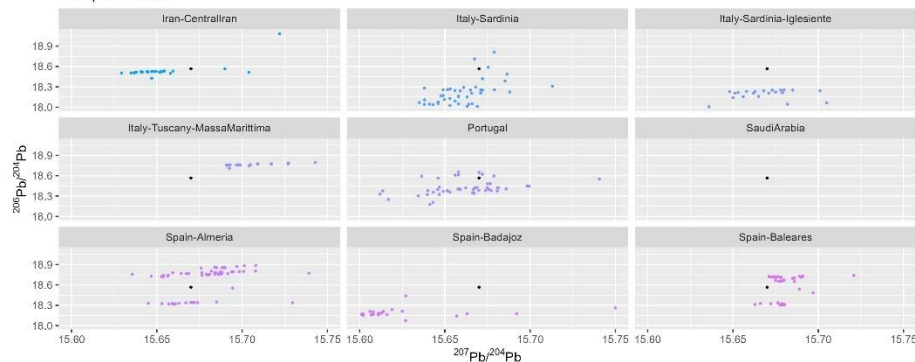

Sample MS026

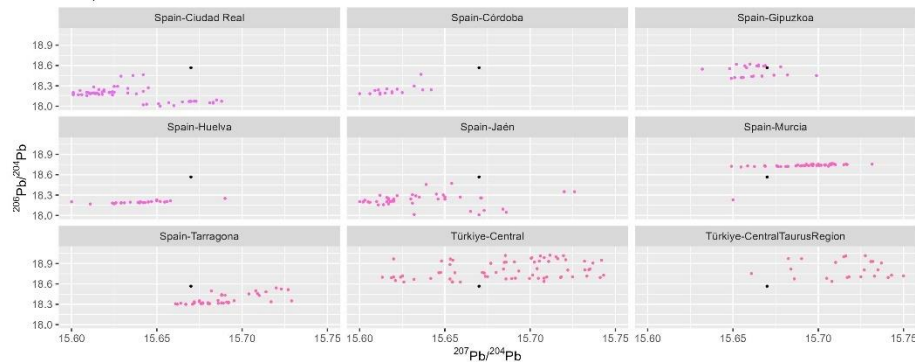

Sample MS026

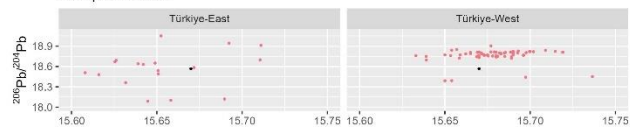

$^{207}\text{Pb}/^{204}\text{Pb}$

Sample MS026

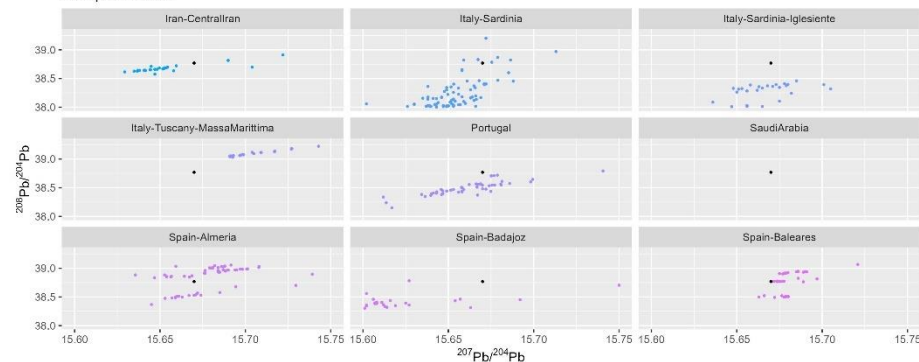

Sample MS026

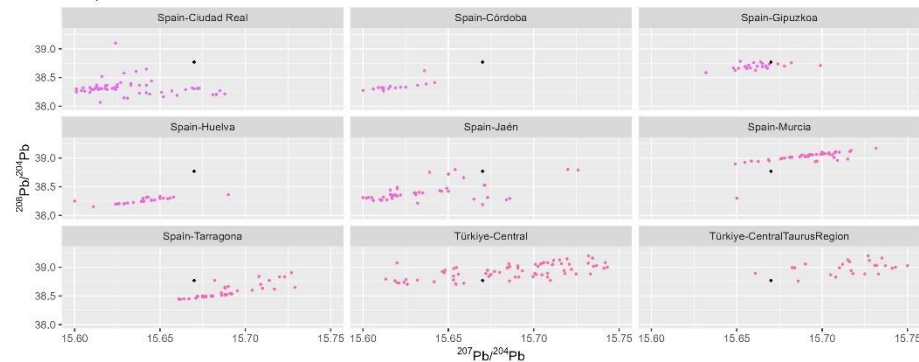

Sample MS026

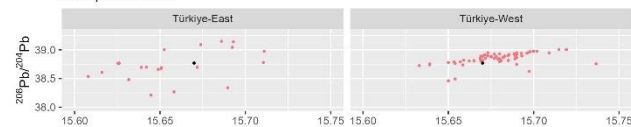

$^{207}\text{Pb}/^{204}\text{Pb}$



Sample MS027

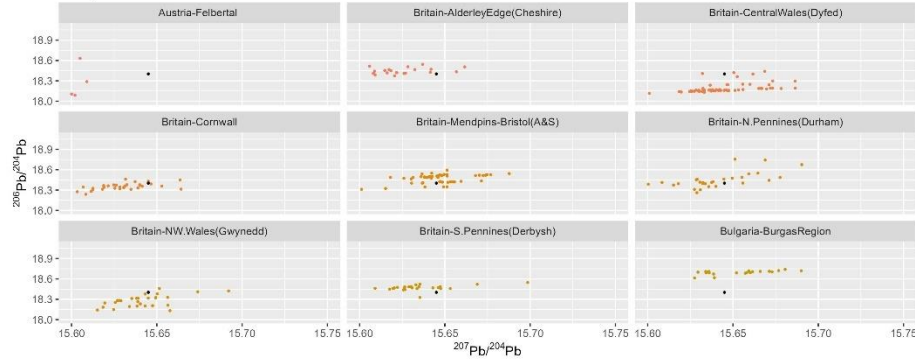

Sample MS027

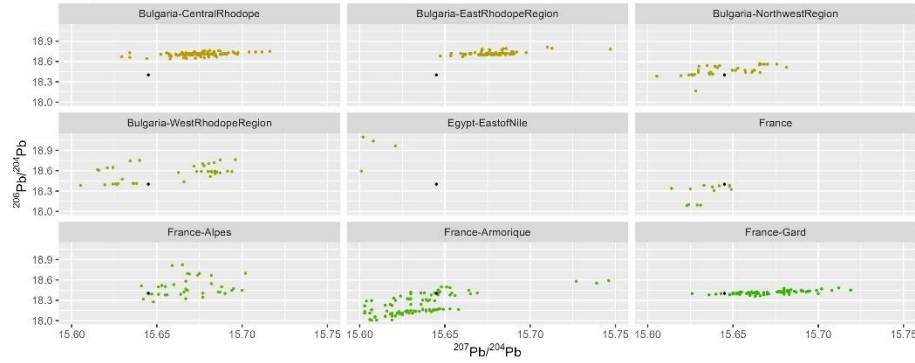

Sample MS027

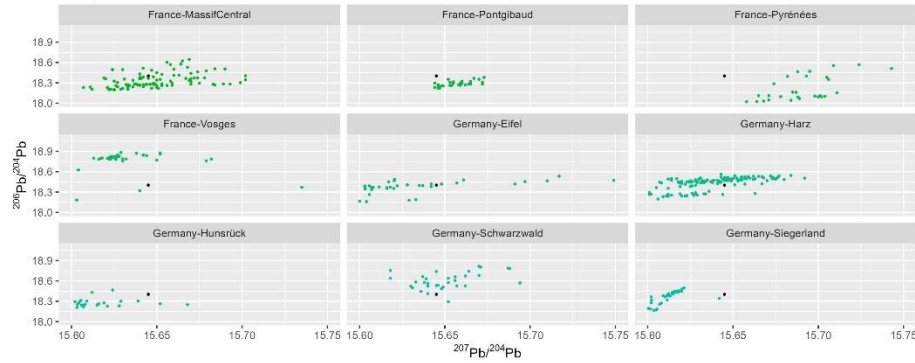

Sample MS027

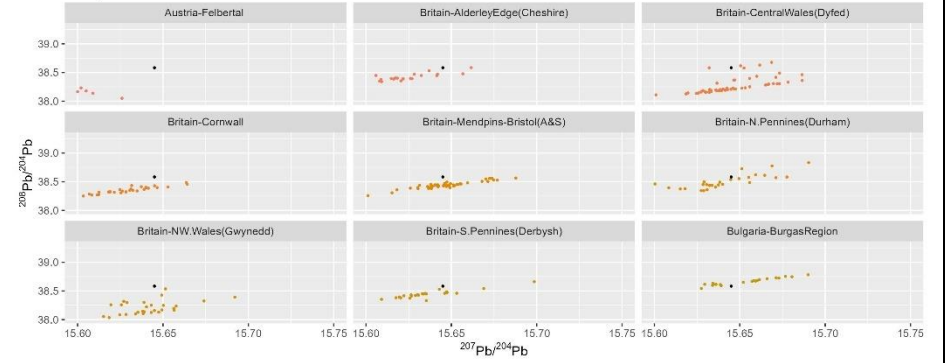

Sample MS027

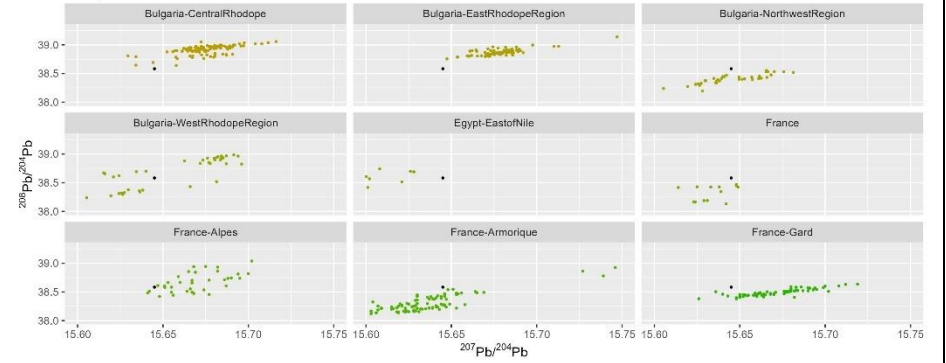

Sample MS027

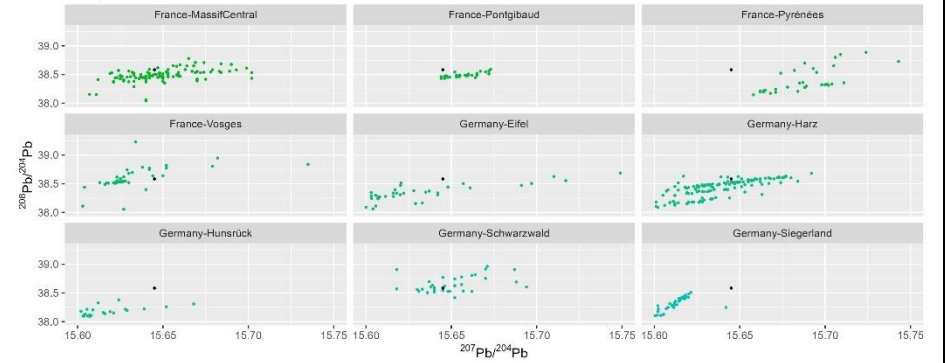

Sample MS027

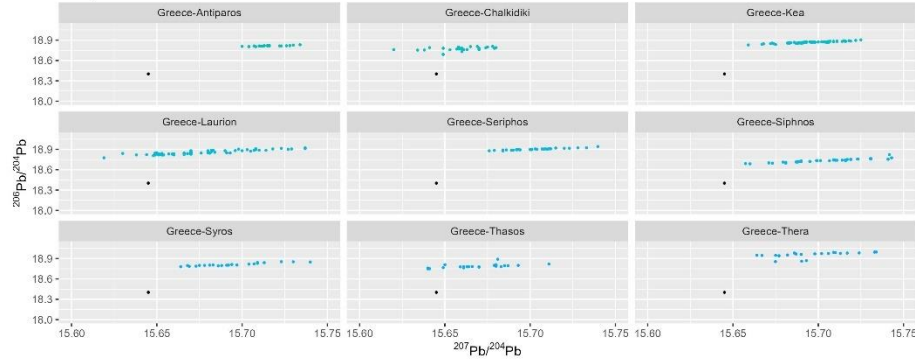

Sample MS027

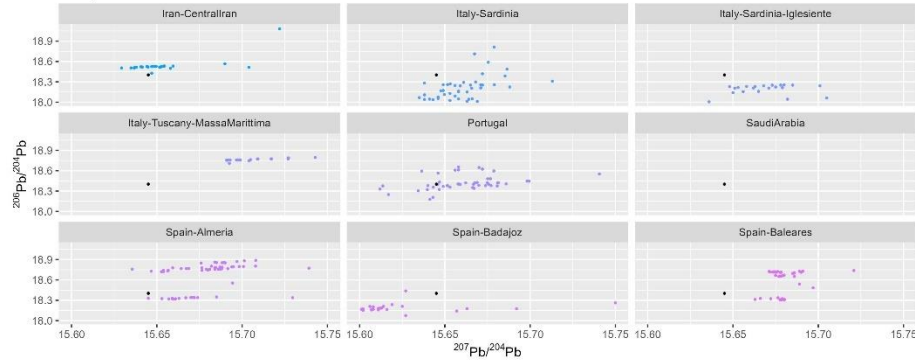

Sample MS027

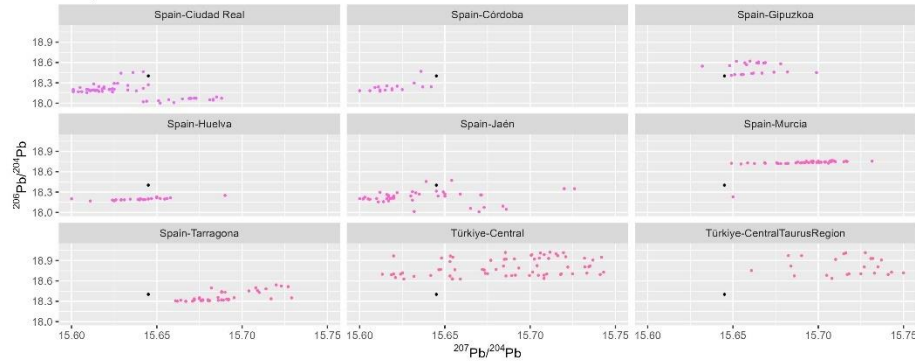

Sample MS027

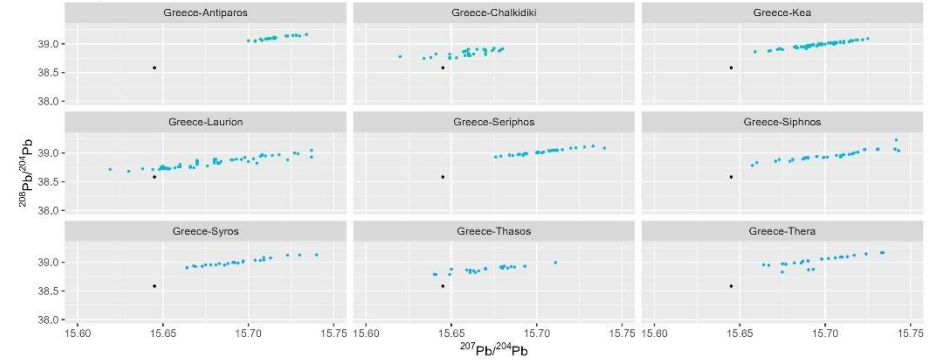

Sample MS027

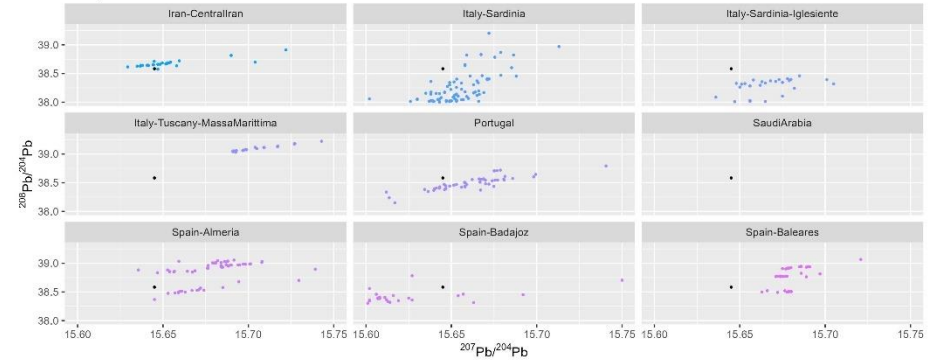

Sample MS027

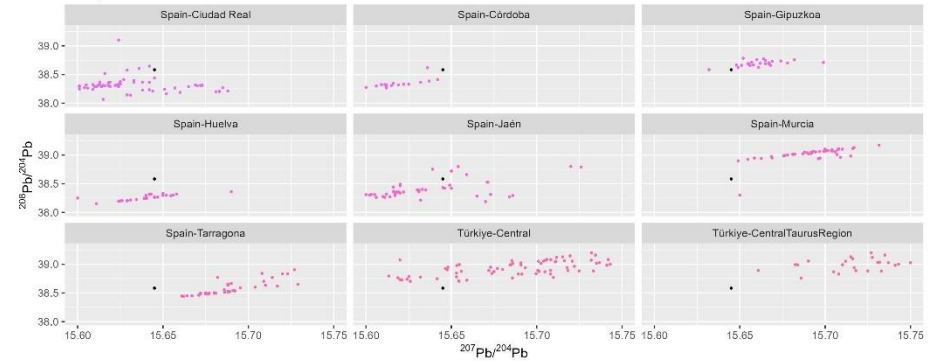

Sample MS027

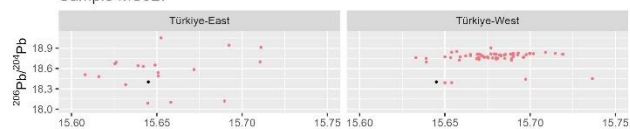 $^{207}\text{Pb}/^{204}\text{Pb}$ 

Sample MS028

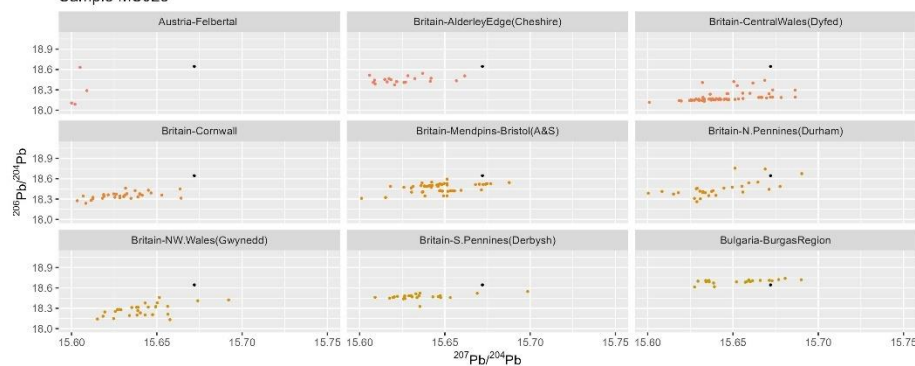 $^{207}\text{Pb}/^{204}\text{Pb}$ 

Sample MS028

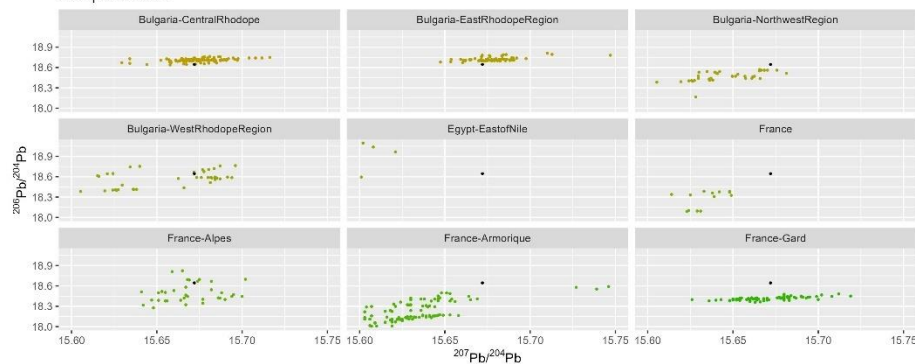 $^{207}\text{Pb}/^{204}\text{Pb}$ 

Sample MS027

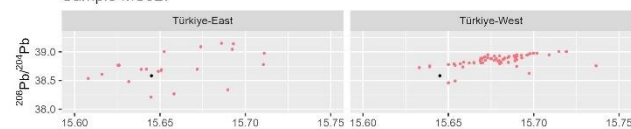 $^{207}\text{Pb}/^{204}\text{Pb}$ 

Sample MS028

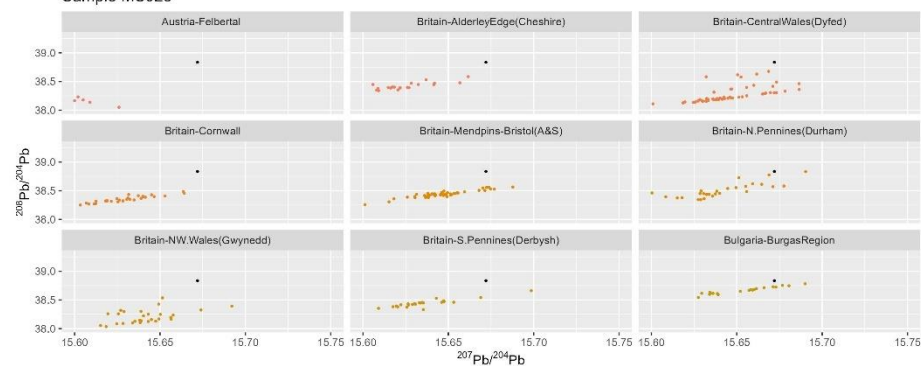 $^{207}\text{Pb}/^{204}\text{Pb}$ 

Sample MS028

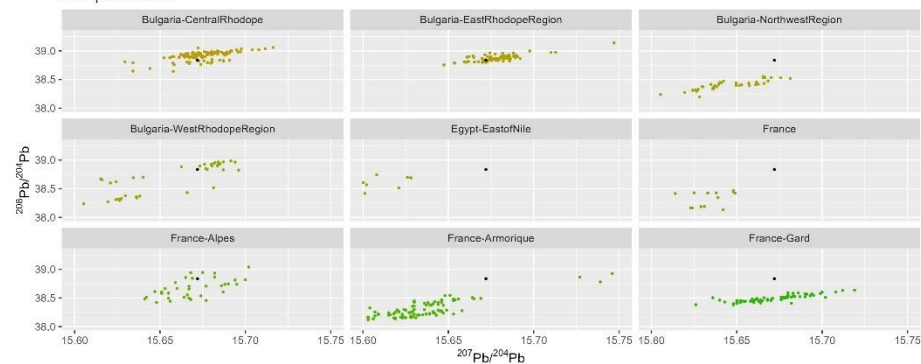 $^{207}\text{Pb}/^{204}\text{Pb}$

Sample MS028

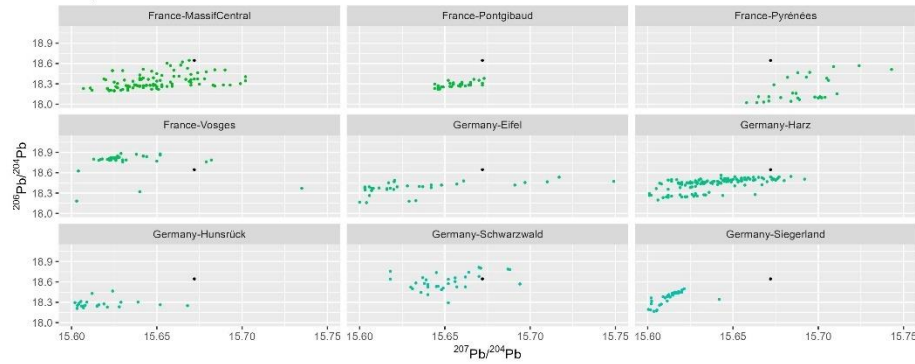

Sample MS028

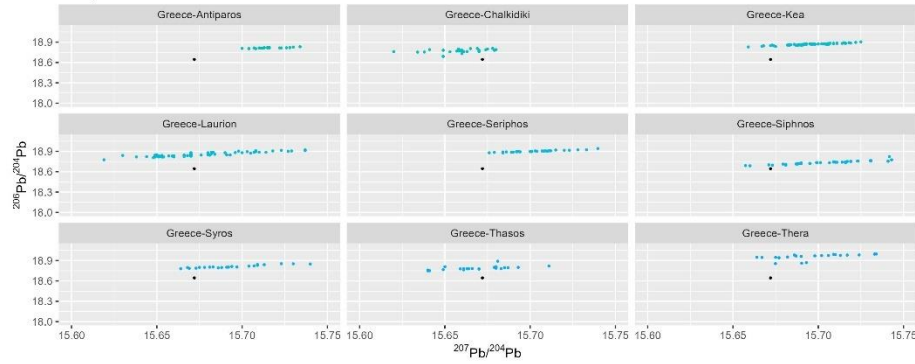

Sample MS028

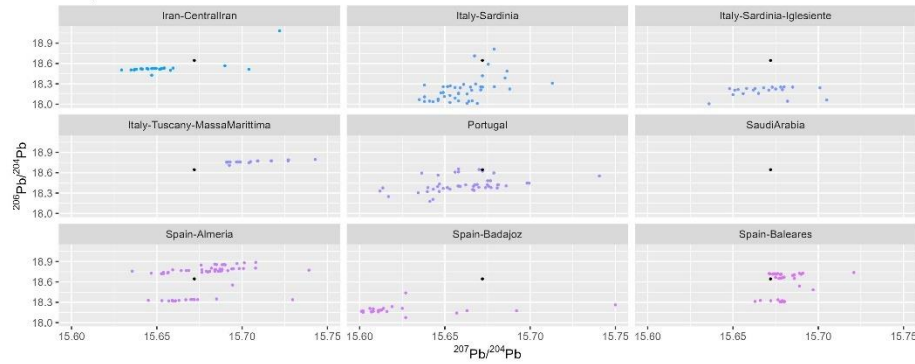

Sample MS028

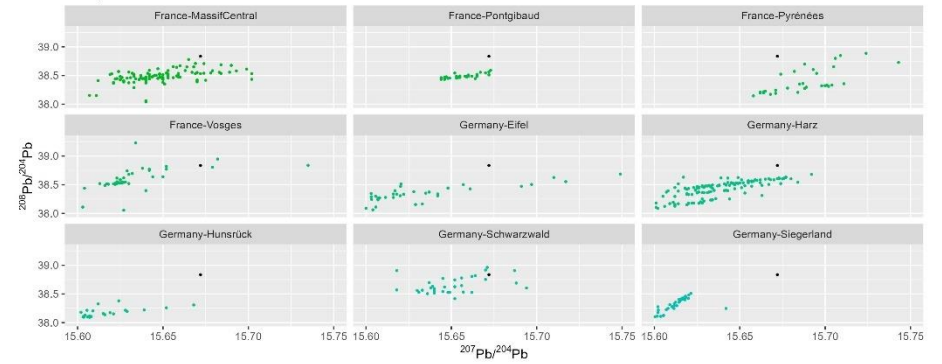

Sample MS028

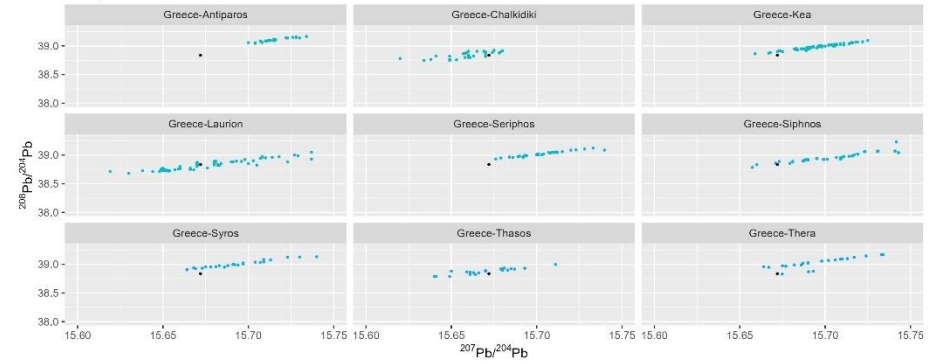

Sample MS028

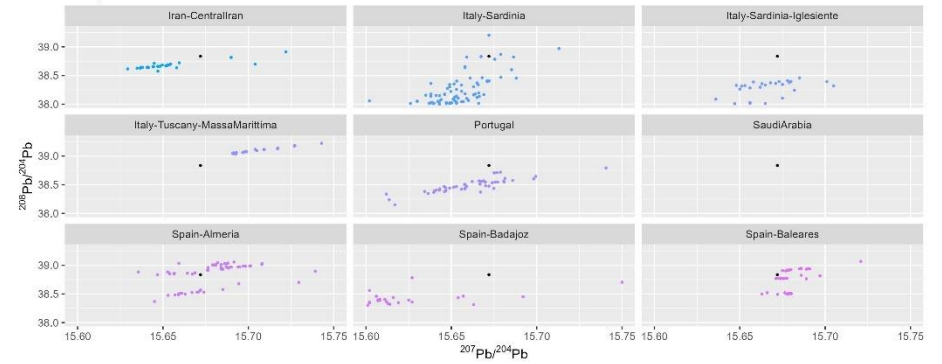



Sample MS028

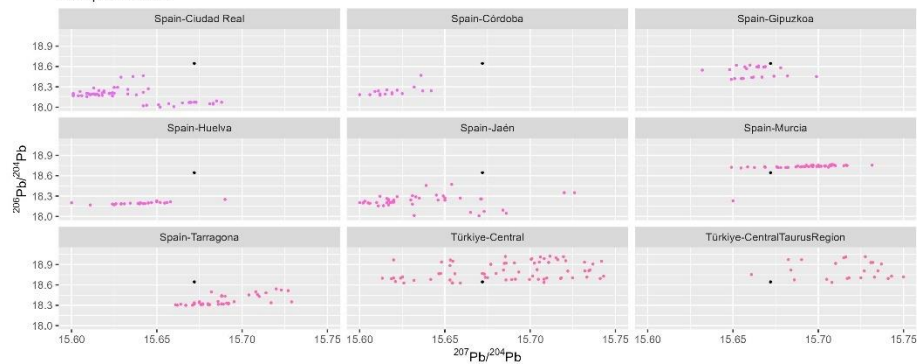

Sample MS028

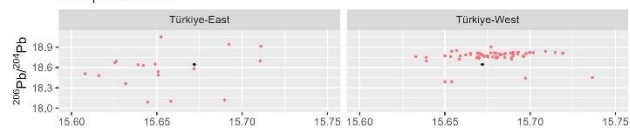 $^{207}\text{Pb}/^{204}\text{Pb}$ 

Sample MS029

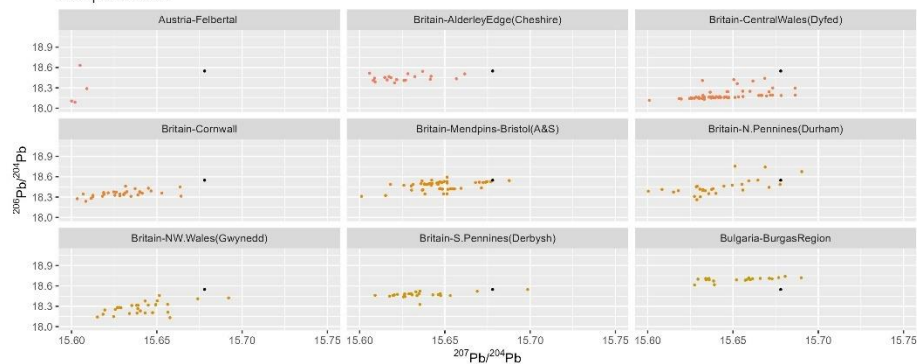

Sample MS028

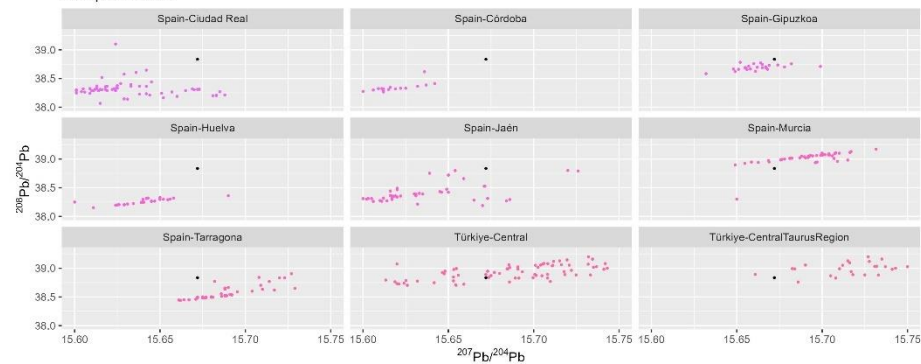

Sample MS028

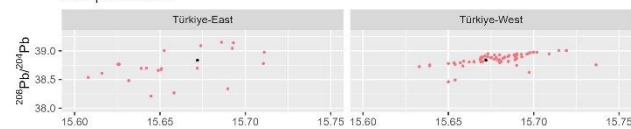 $^{207}\text{Pb}/^{204}\text{Pb}$ 

Sample MS029

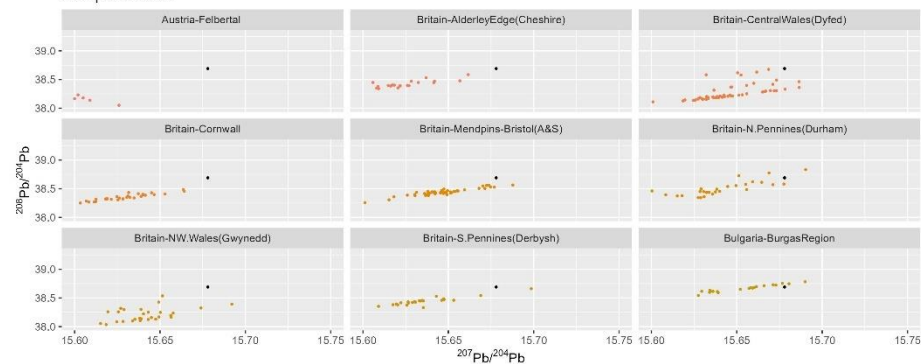



Sample MS029

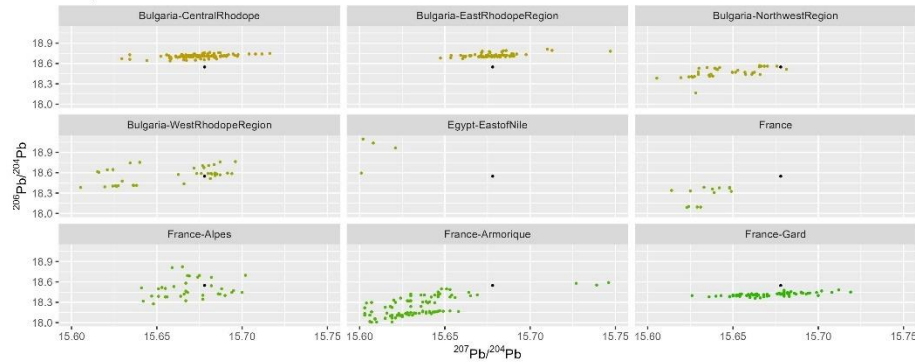

Sample MS029

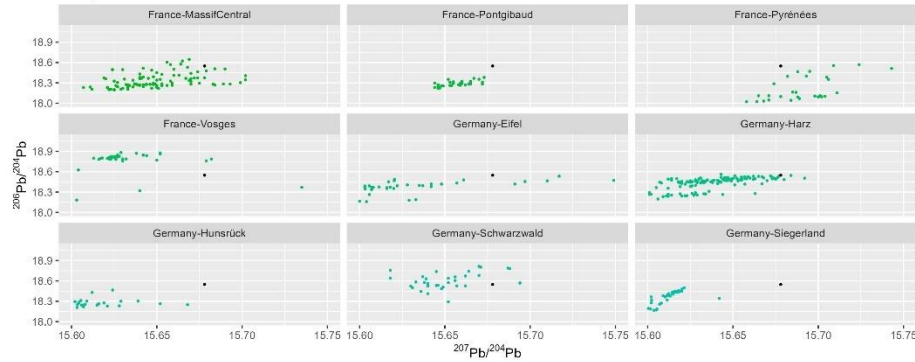

Sample MS029

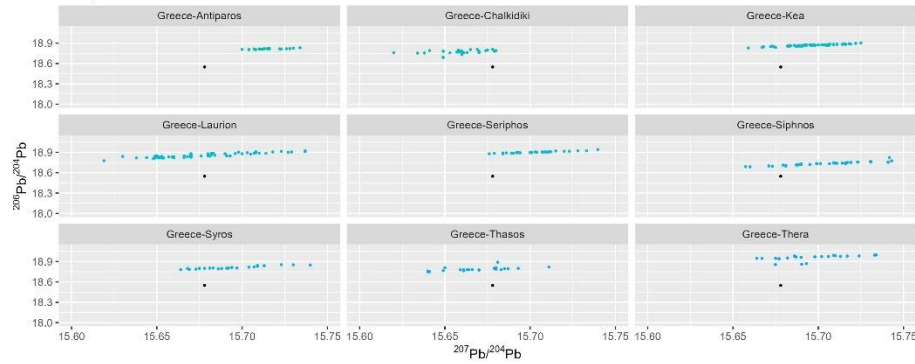

Sample MS029

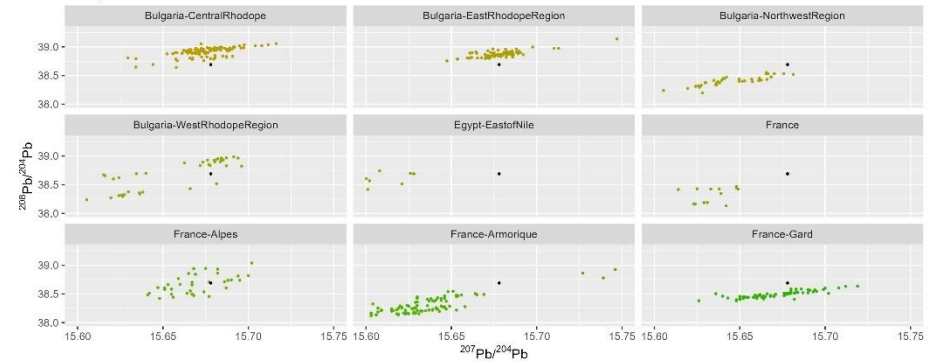

Sample MS029

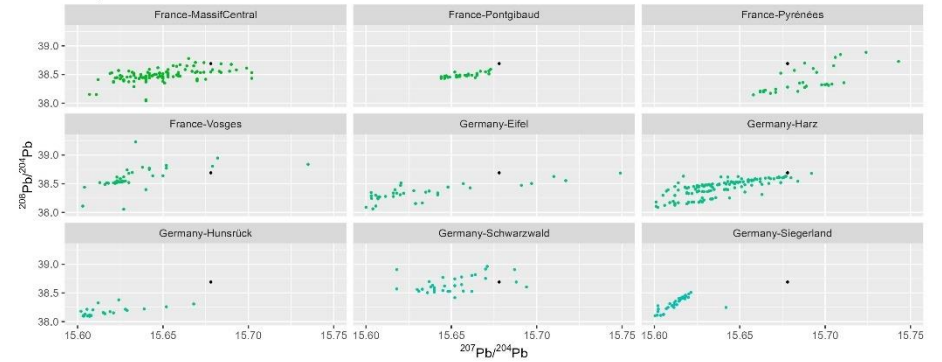

Sample MS029

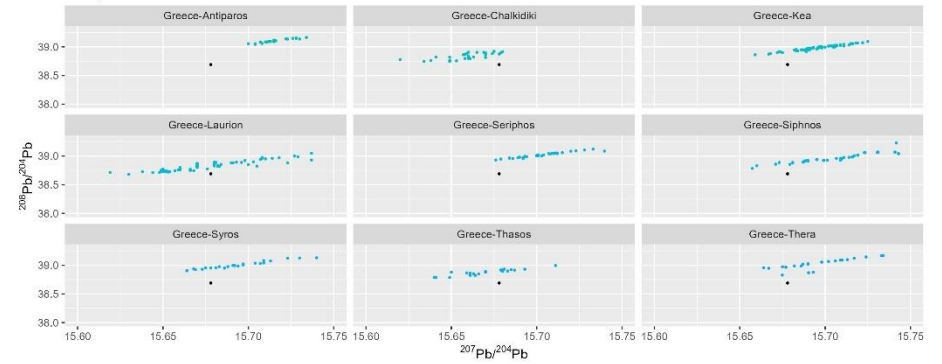

Sample MS029

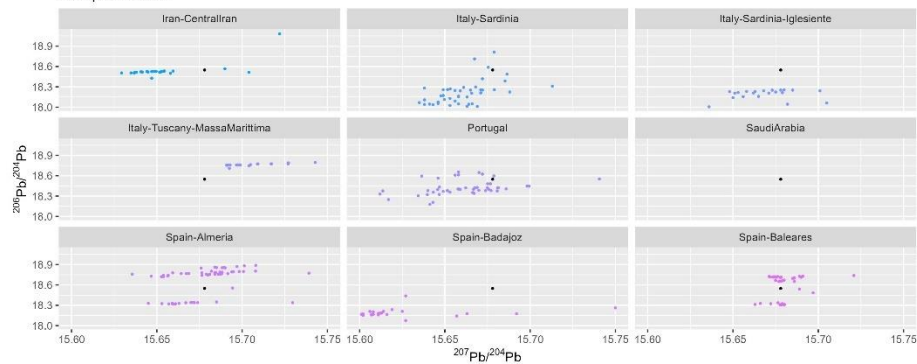

Sample MS029

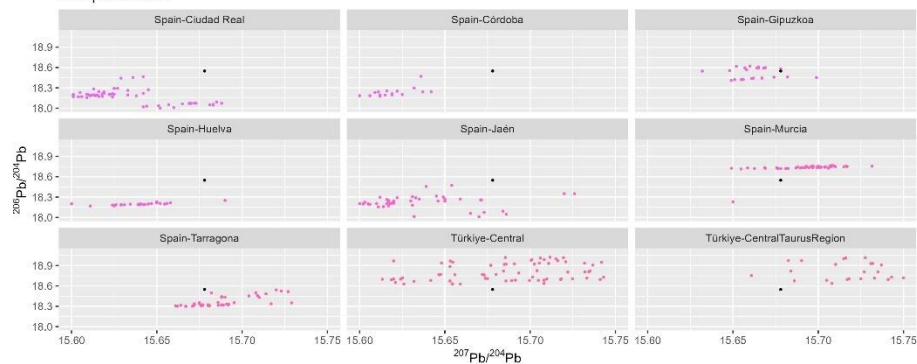

Sample MS029

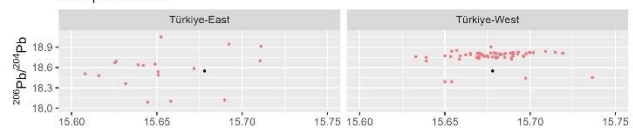

$^{207}\text{Pb}/^{204}\text{Pb}$

Sample MS029

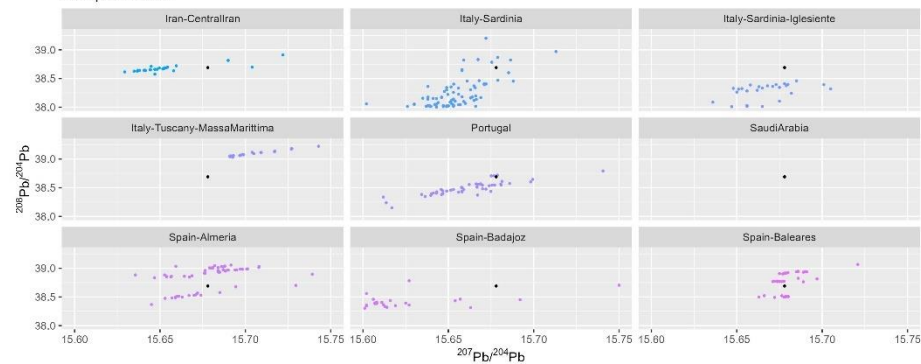

Sample MS029

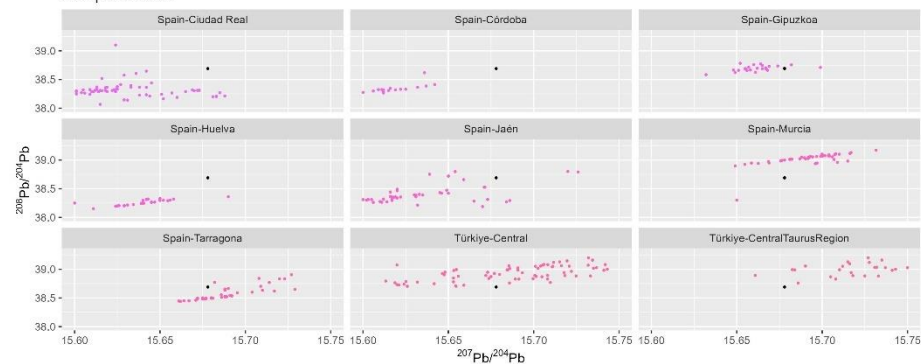

Sample MS029

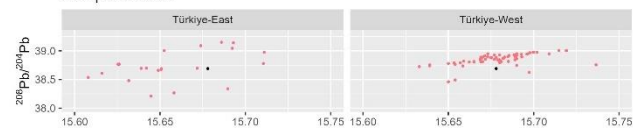

$^{207}\text{Pb}/^{204}\text{Pb}$

Sample MS030

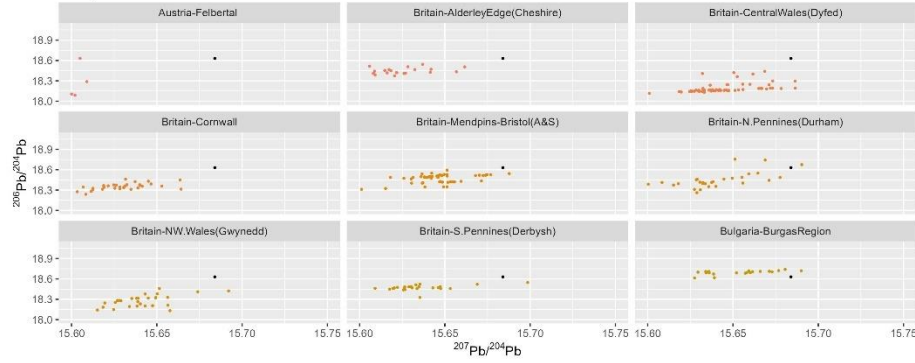

Sample MS030

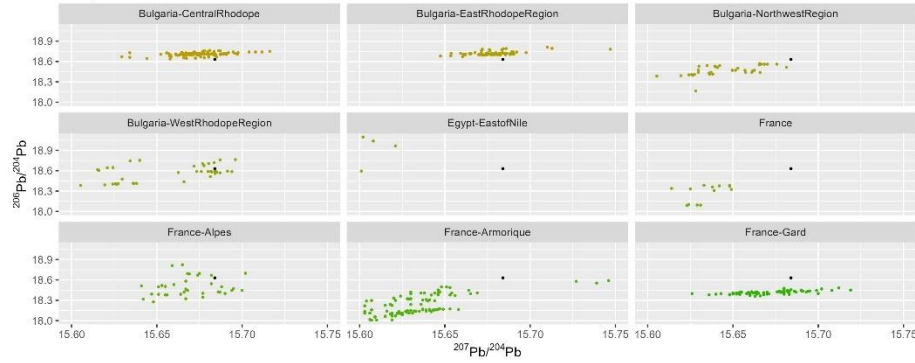

Sample MS030

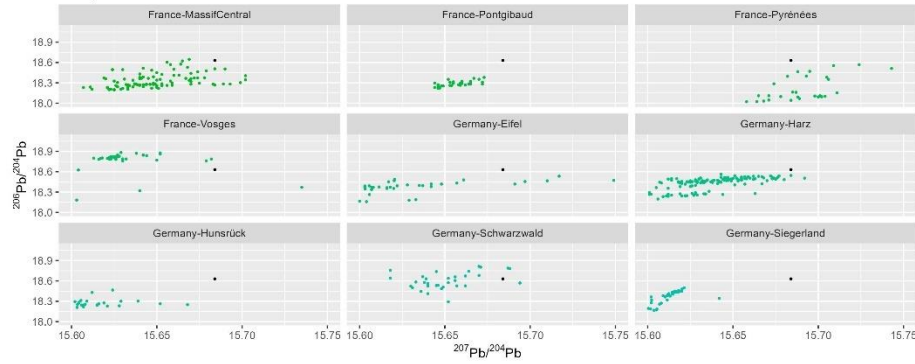

Sample MS030

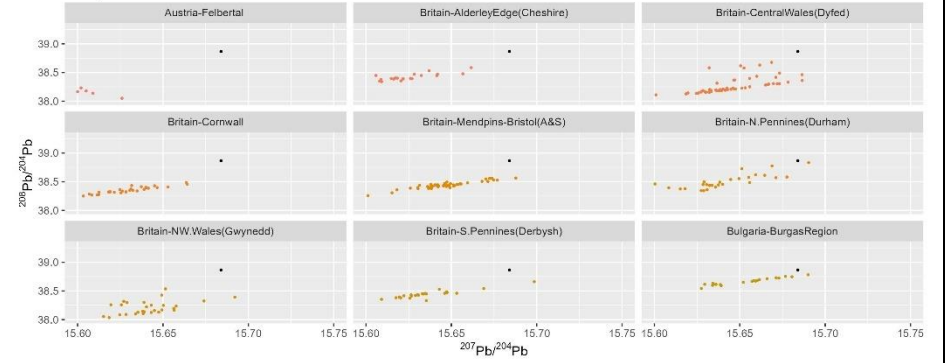

Sample MS030

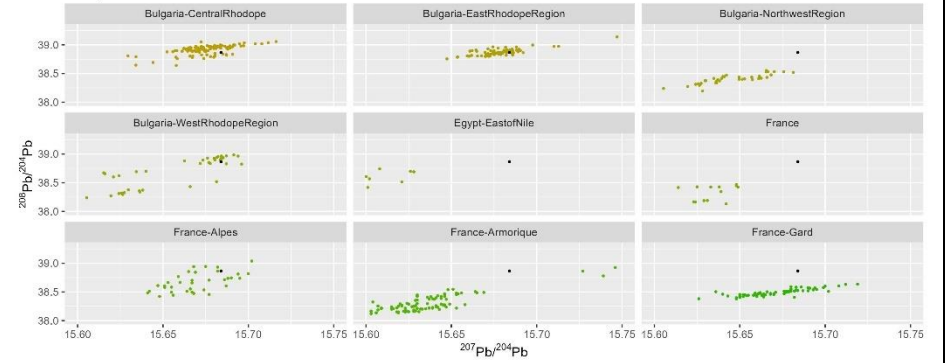

Sample MS030

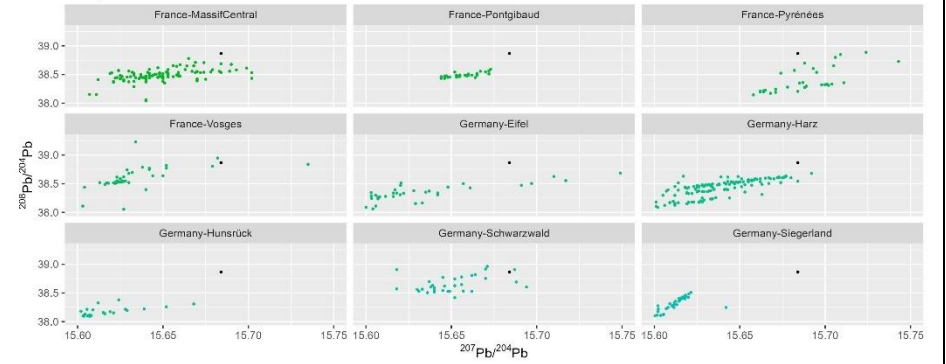

Sample MS030

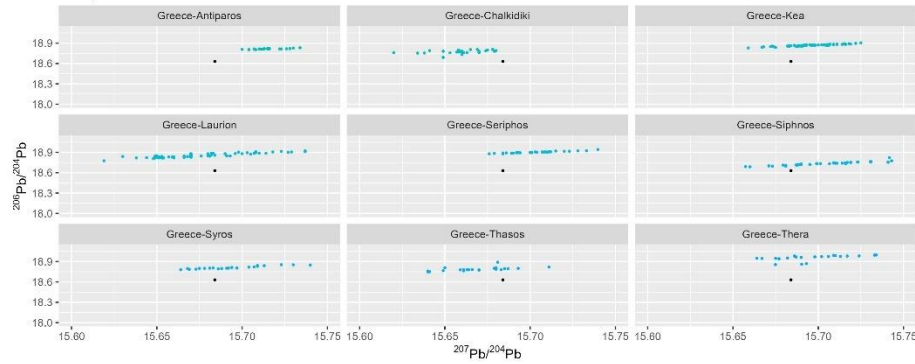

Sample MS030

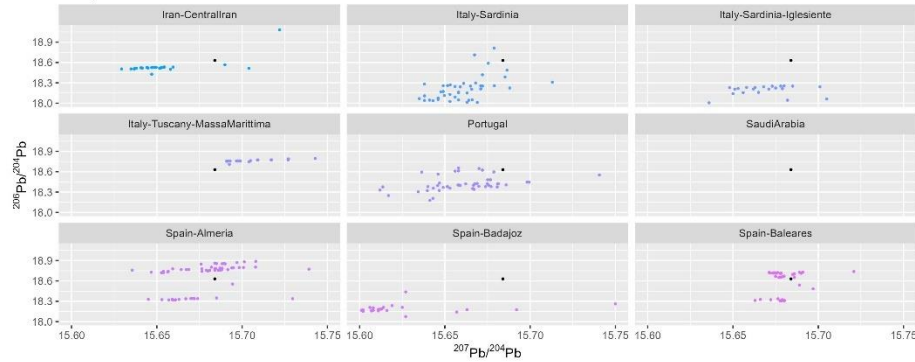

Sample MS030

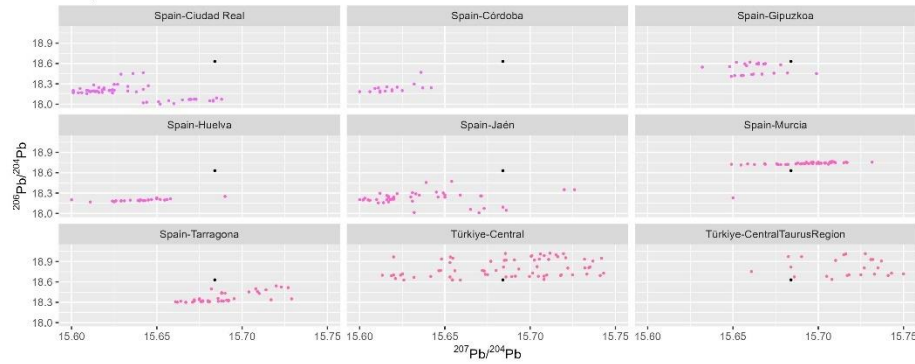

Sample MS030

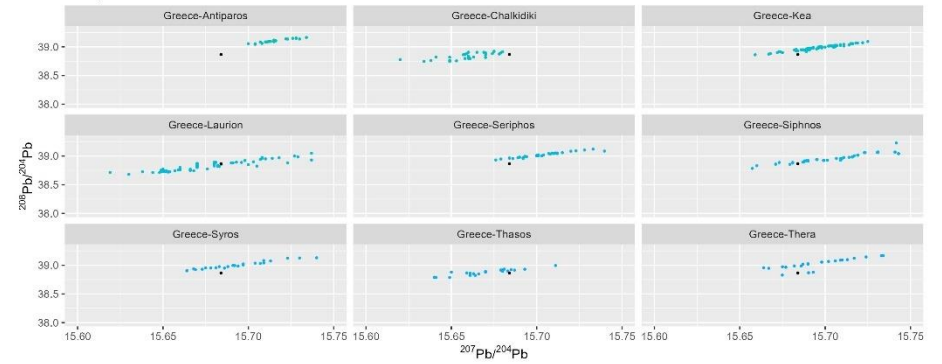

Sample MS030

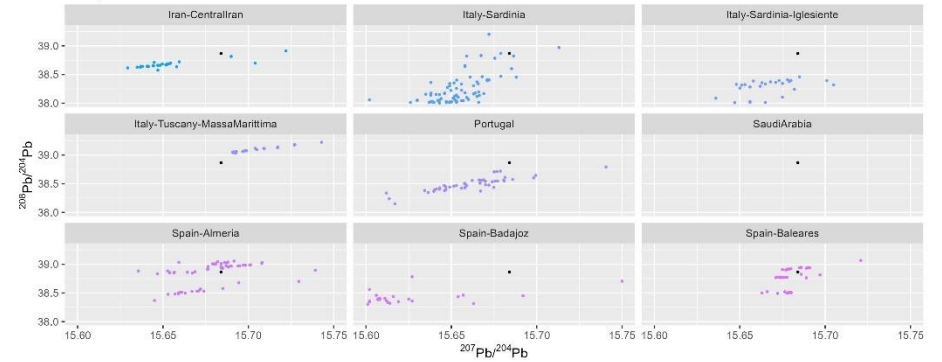

Sample MS030

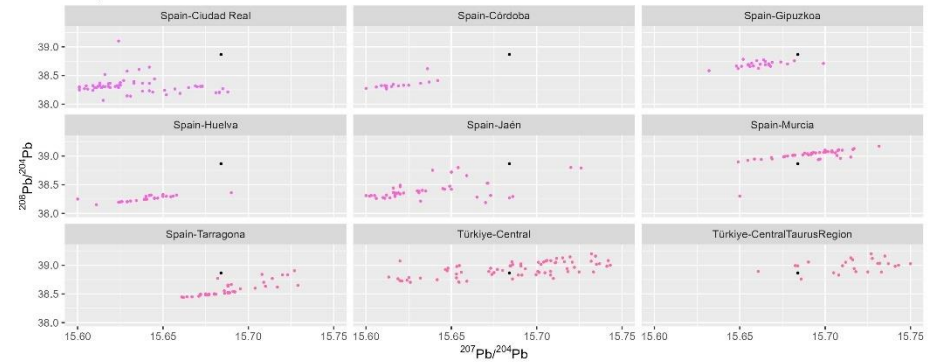



Sample MS030

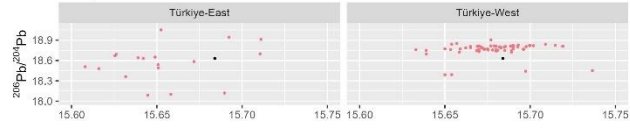

Sample MS030

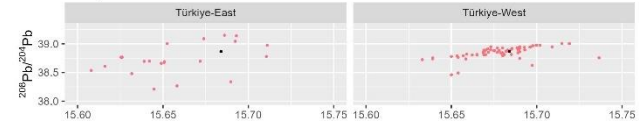 $^{207}\text{Pb}/^{204}\text{Pb}$ 

Sample MS031

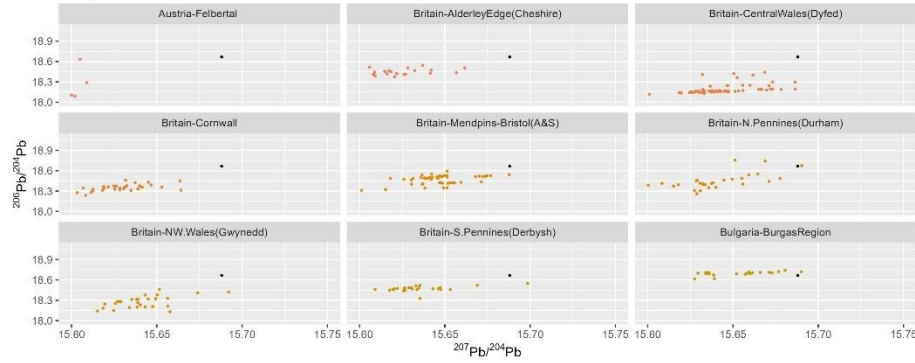 $^{207}\text{Pb}/^{204}\text{Pb}$ 

Sample MS031

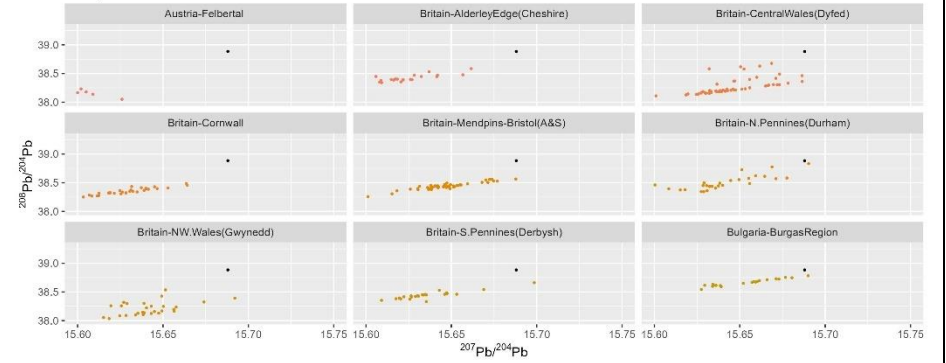

Sample MS031

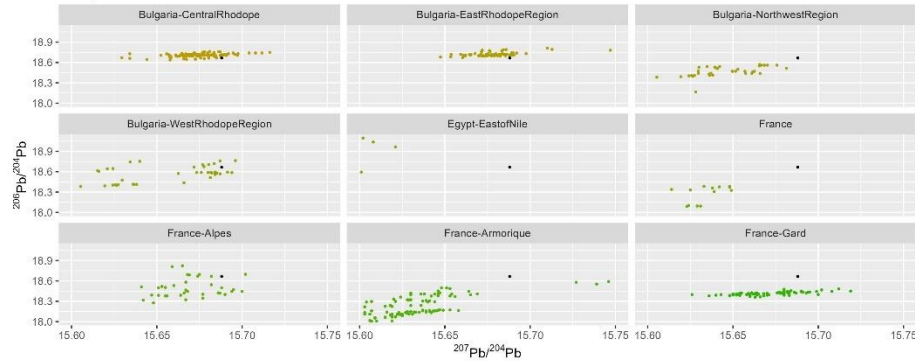

Sample MS031

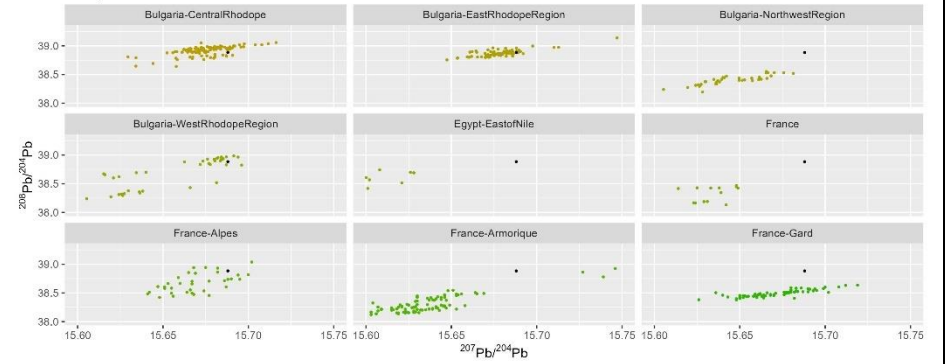



Sample MS031

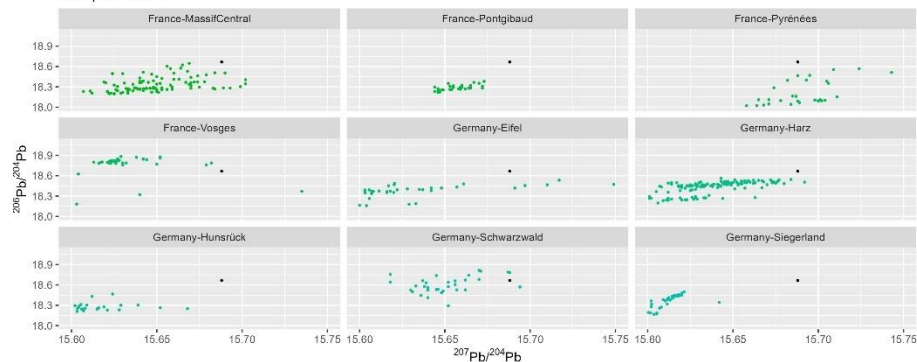

Sample MS031

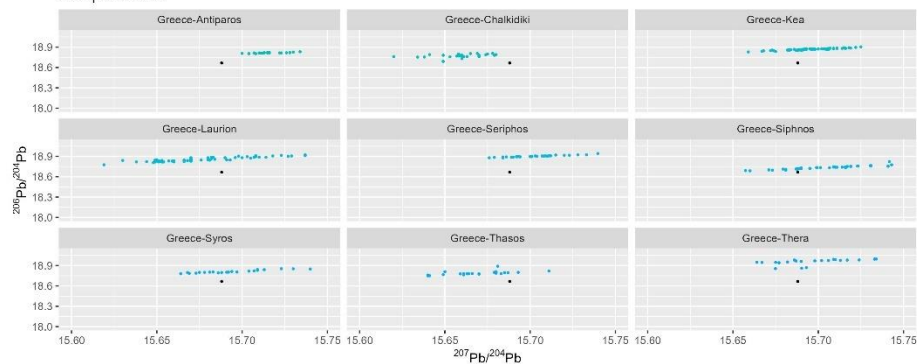

Sample MS031

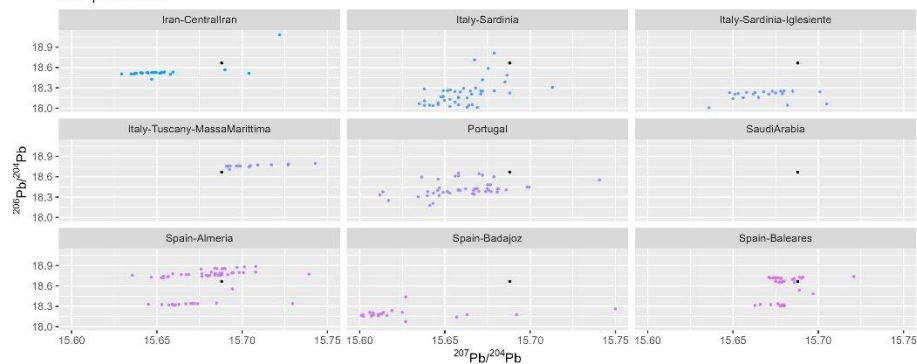

Sample MS031

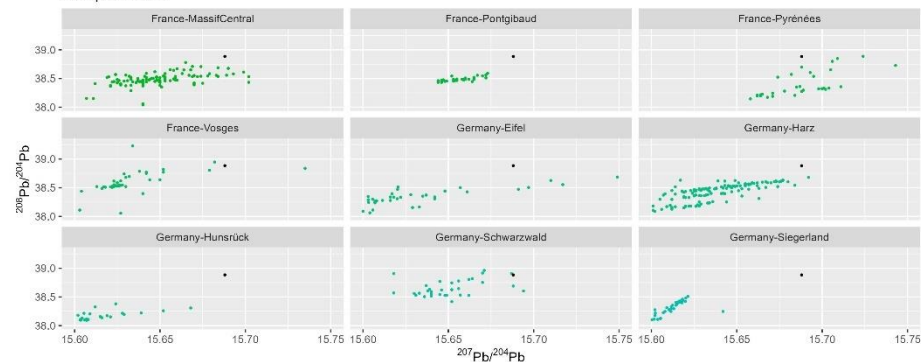

Sample MS031

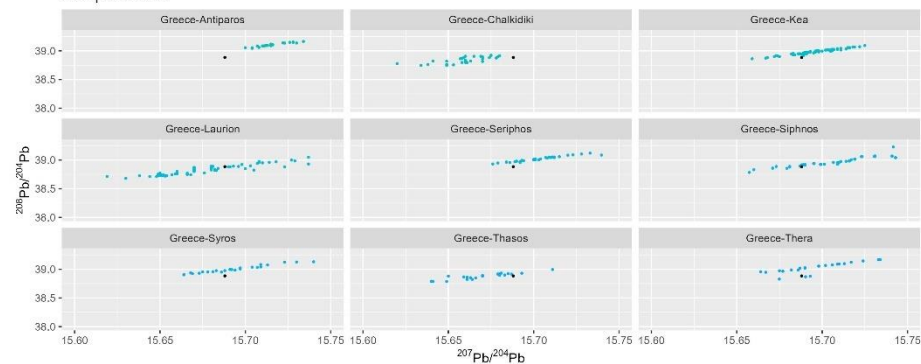

Sample MS031

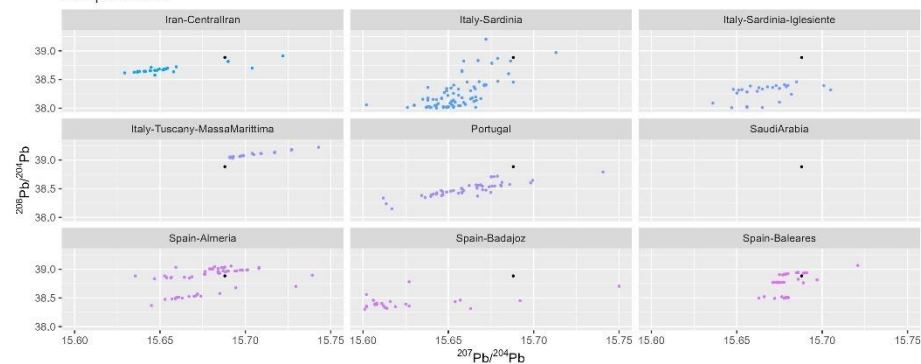

Sample MS031

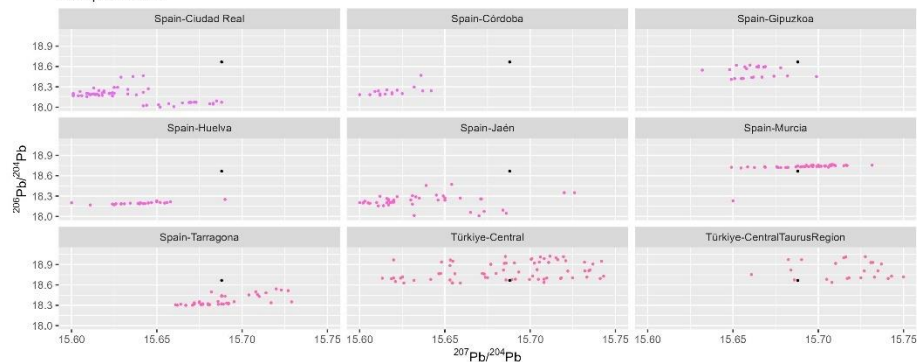

Sample MS031

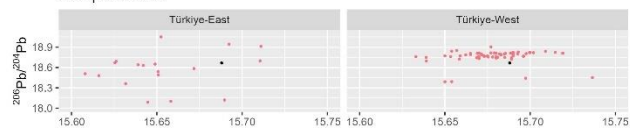

$^{207}\text{Pb}/^{204}\text{Pb}$

Sample MS032

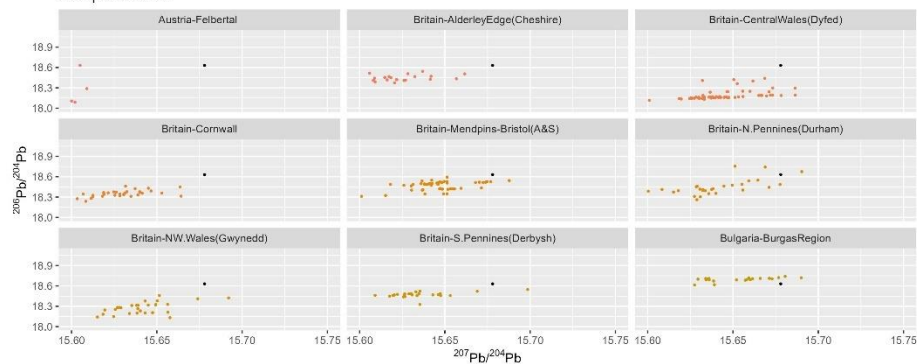

Sample MS031

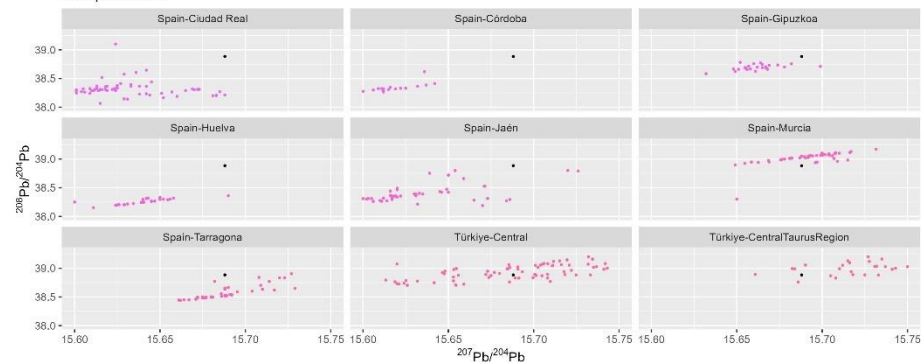

Sample MS031

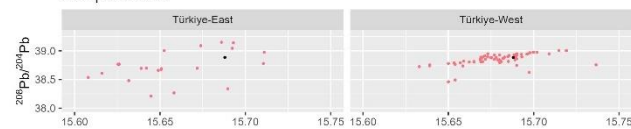

$^{207}\text{Pb}/^{204}\text{Pb}$

Sample MS032

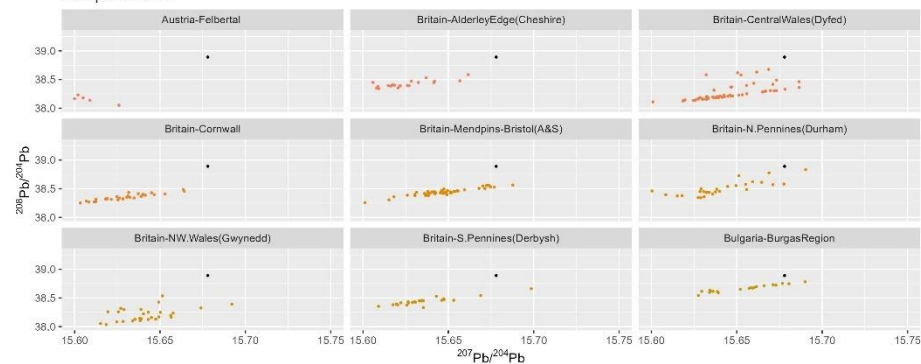

Sample MS032

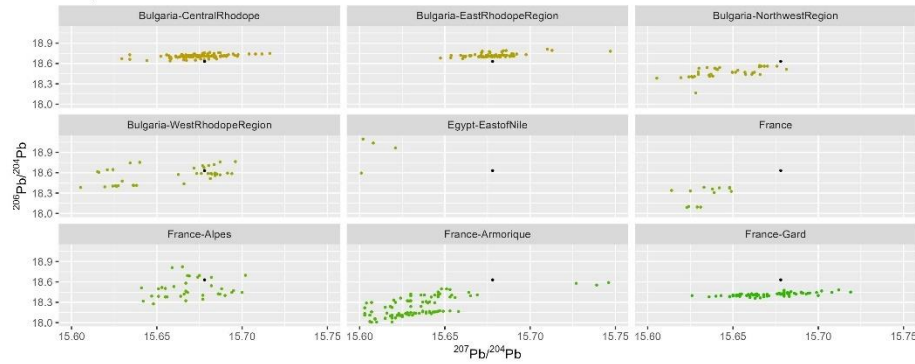

Sample MS032

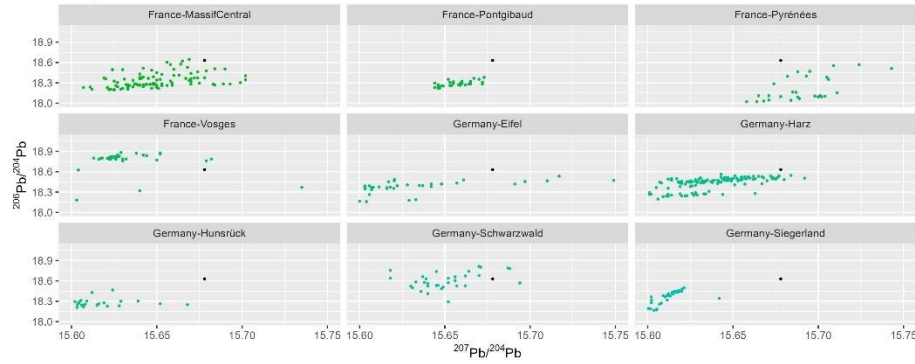

Sample MS032

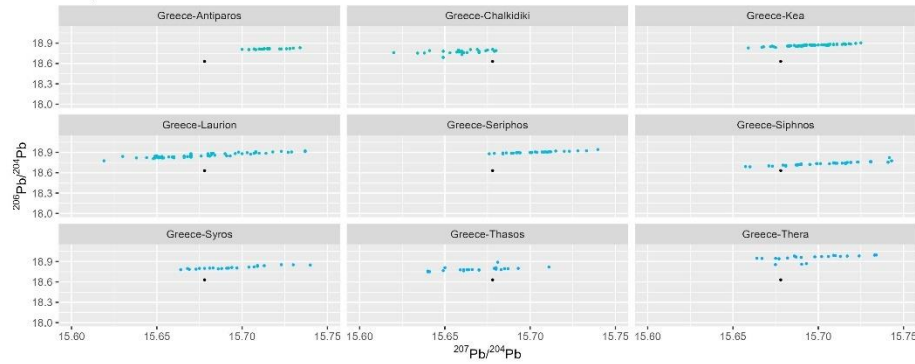

Sample MS032

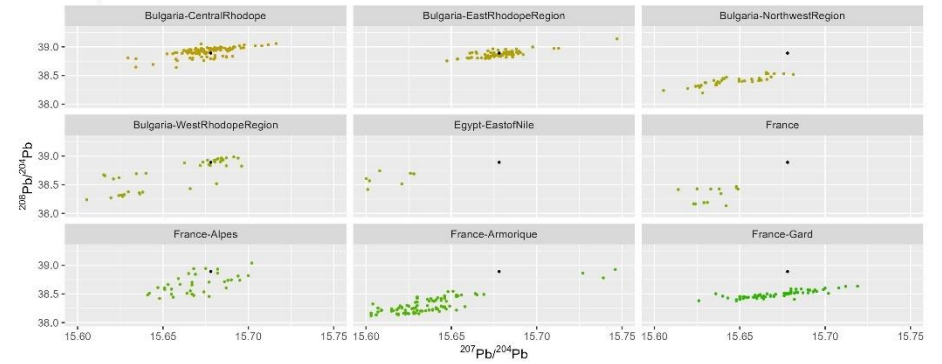

Sample MS032

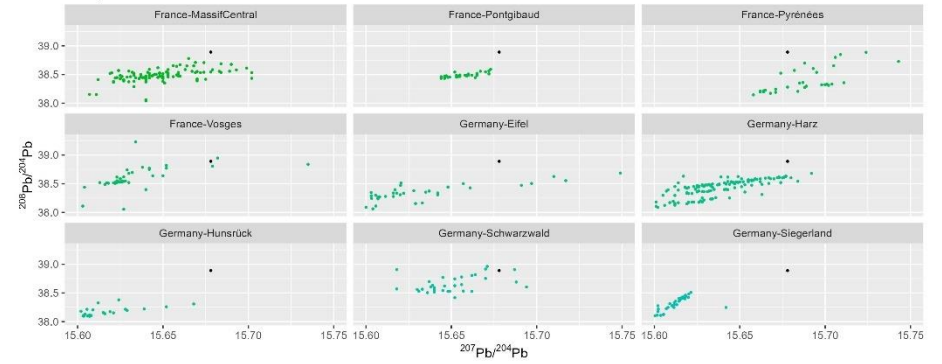

Sample MS032

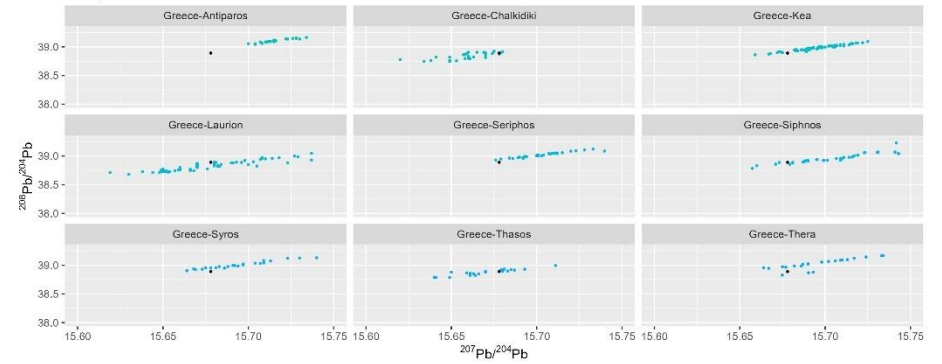

Sample MS032

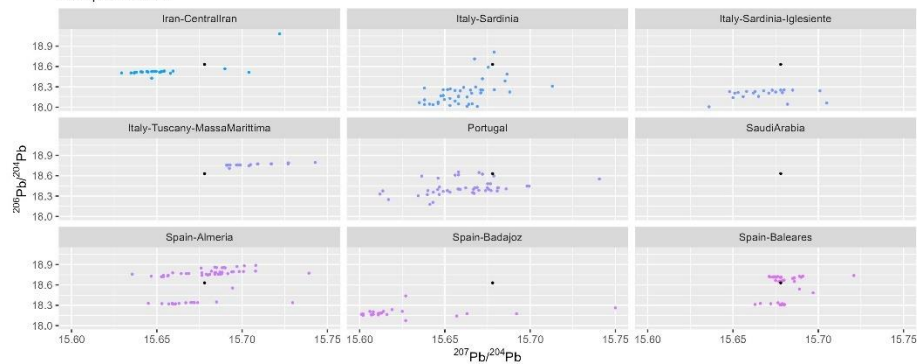

Sample MS032

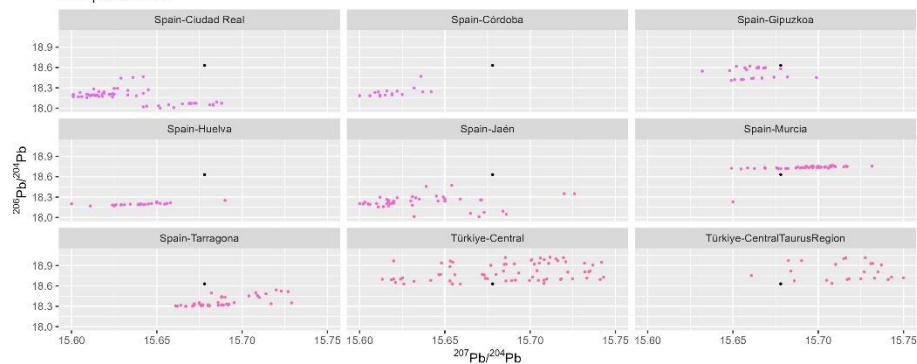

Sample MS032

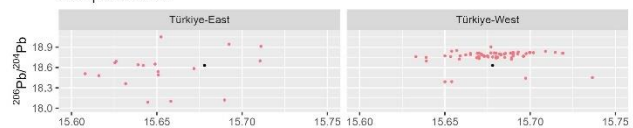

$^{207}\text{Pb}/^{204}\text{Pb}$

Sample MS032

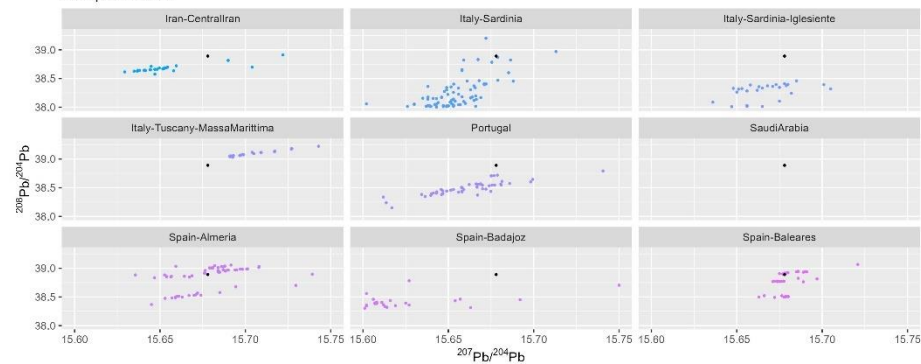

Sample MS032

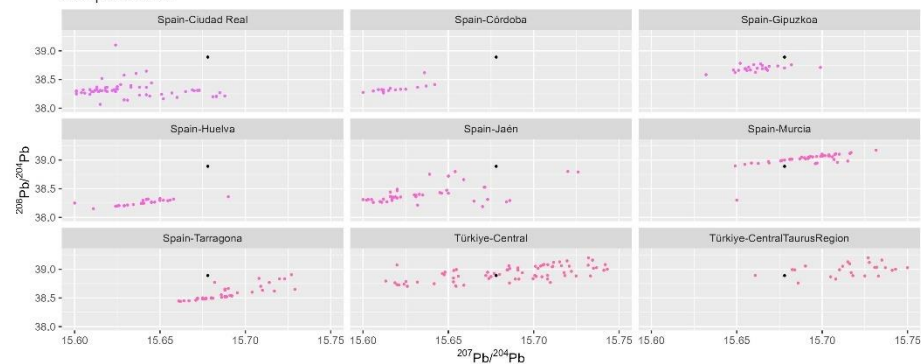

Sample MS032

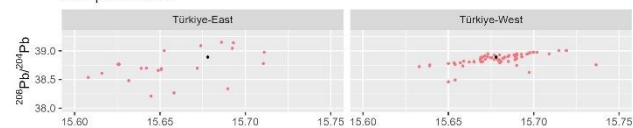

$^{207}\text{Pb}/^{204}\text{Pb}$



Sample MS033

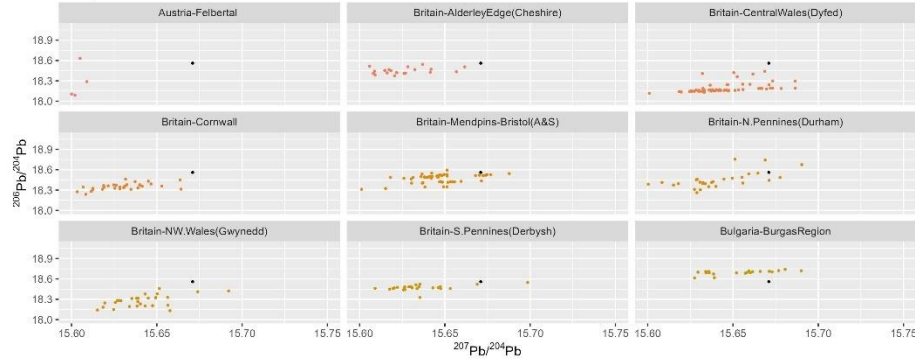

Sample MS033

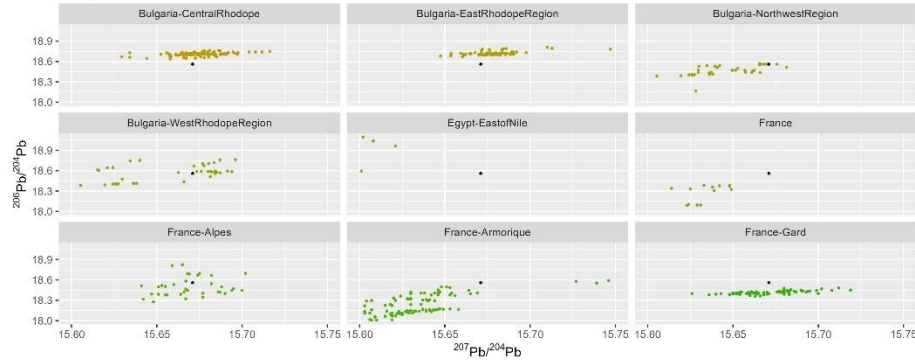

Sample MS033

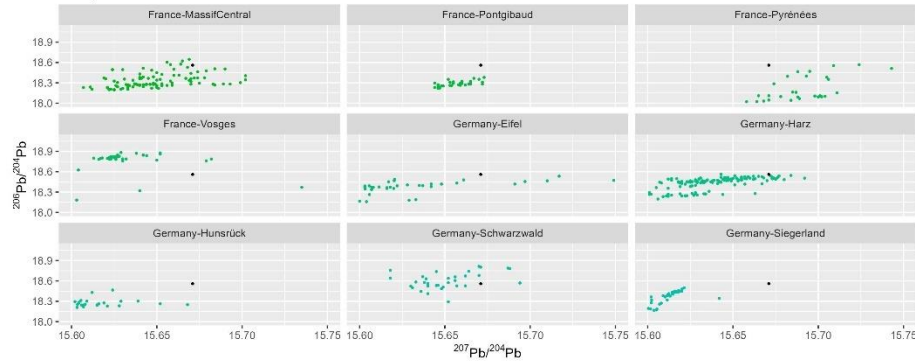

Sample MS033

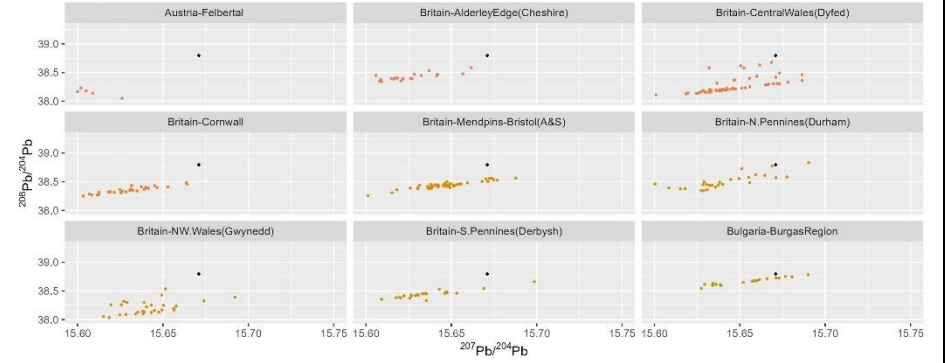

Sample MS033

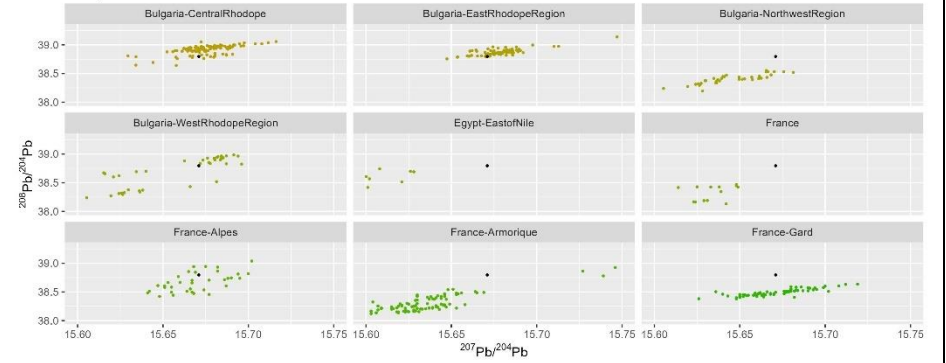

Sample MS033

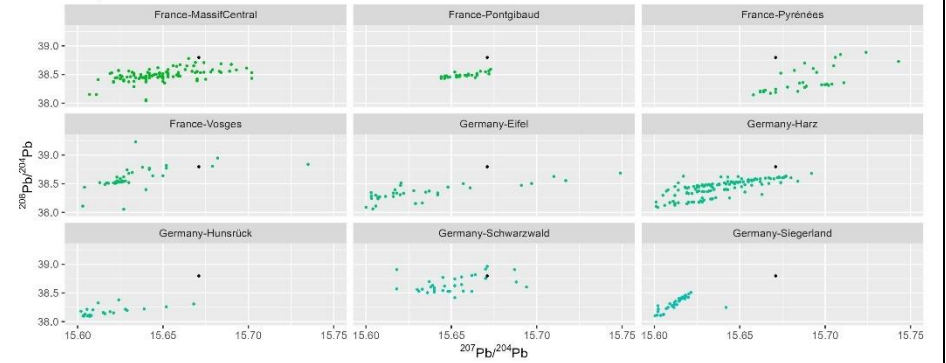



Sample MS033

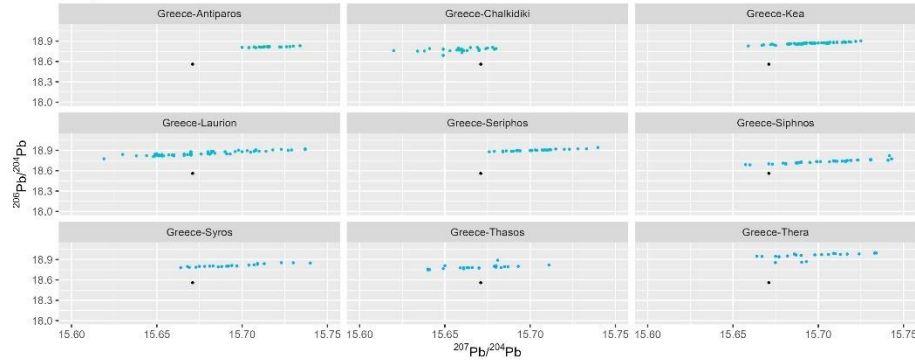

Sample MS033

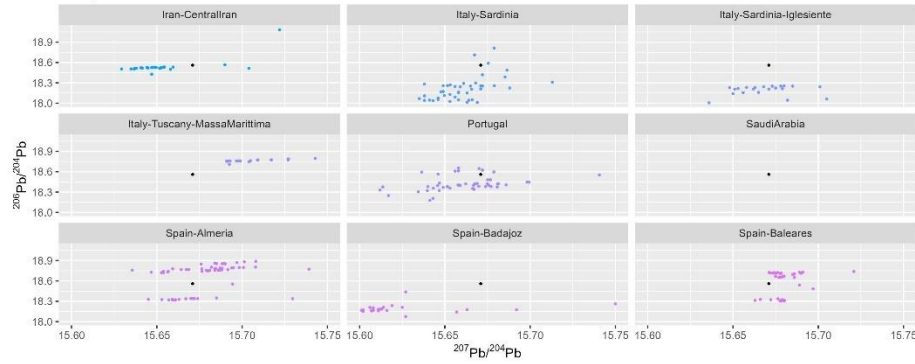

Sample MS033

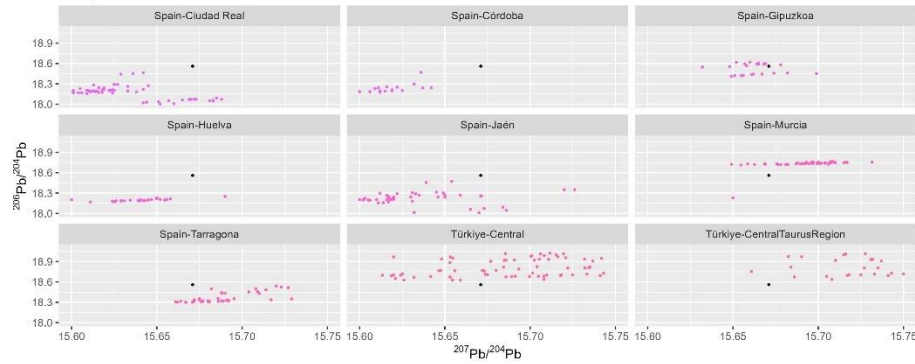

Sample MS033

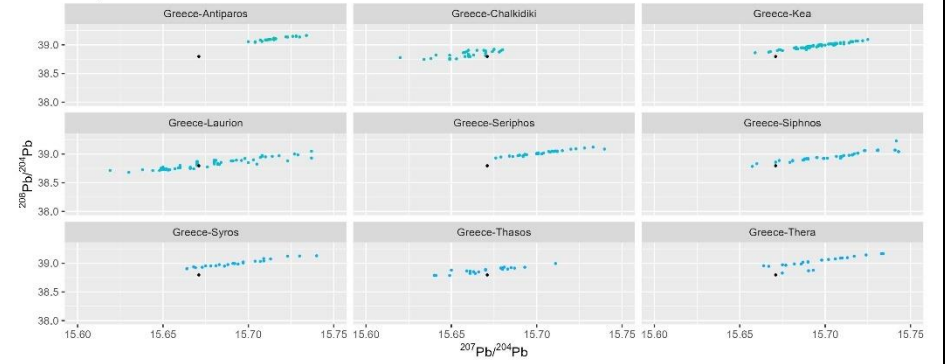

Sample MS033

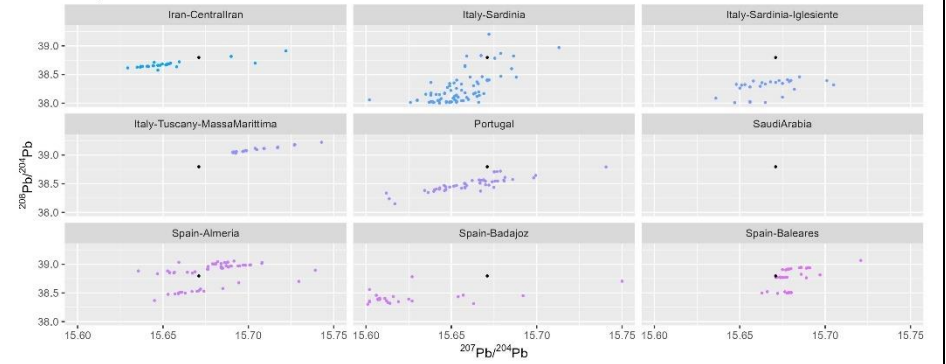

Sample MS033

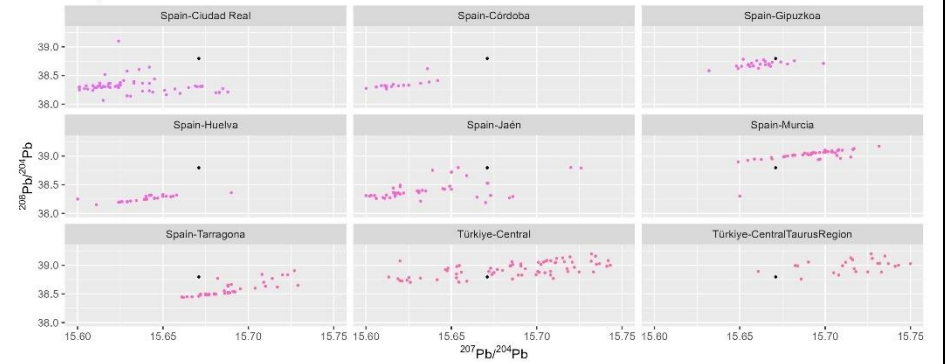

Sample MS033

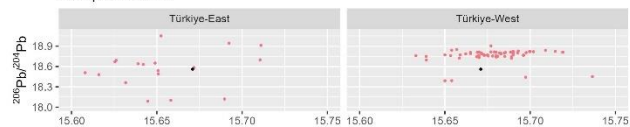 $^{207}\text{Pb}/^{204}\text{Pb}$ 

Sample MS034

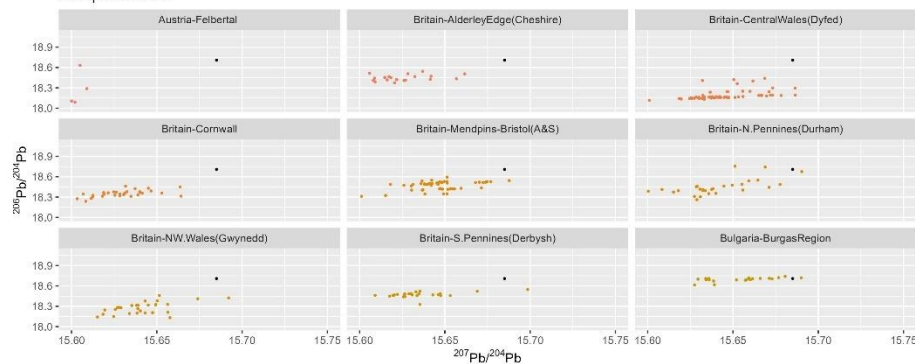 $^{207}\text{Pb}/^{204}\text{Pb}$ 

Sample MS034

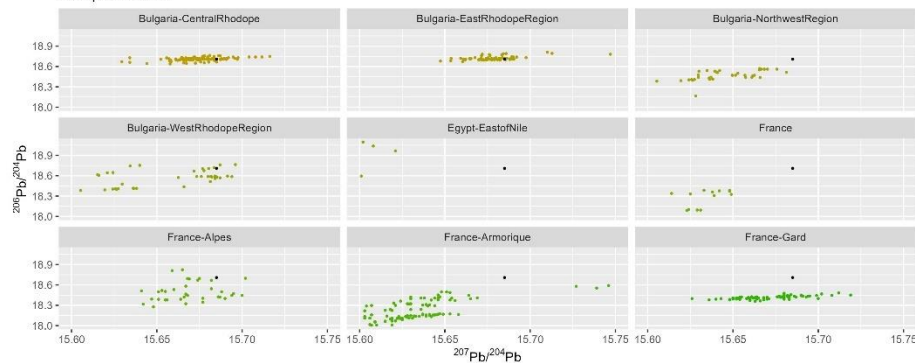 $^{207}\text{Pb}/^{204}\text{Pb}$ 

Sample MS033

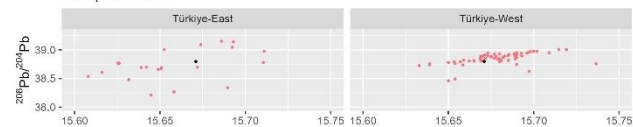 $^{207}\text{Pb}/^{204}\text{Pb}$ 

Sample MS034

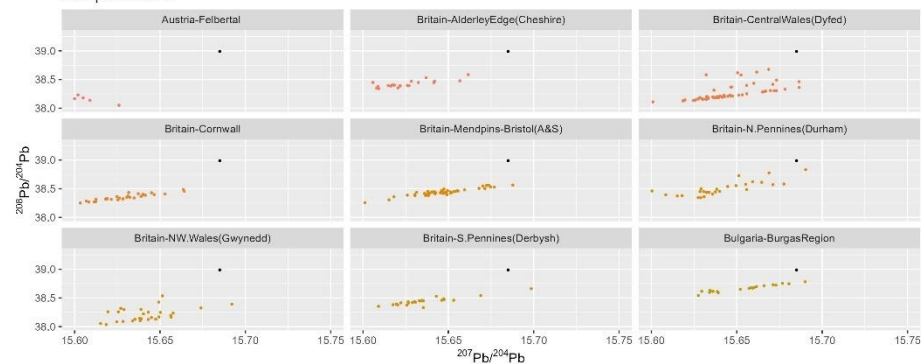 $^{207}\text{Pb}/^{204}\text{Pb}$ 

Sample MS034

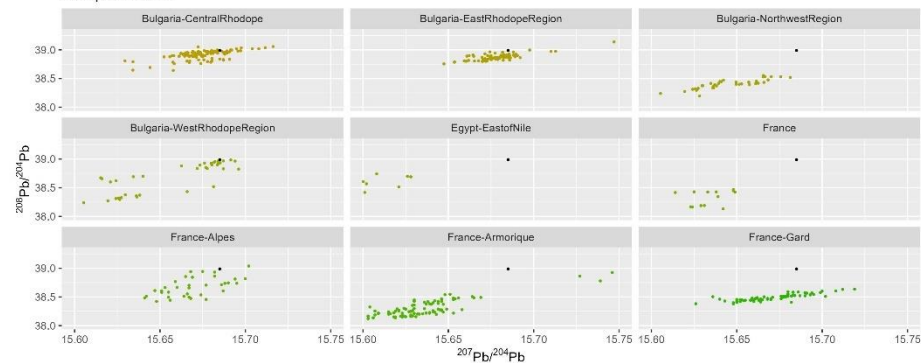 $^{207}\text{Pb}/^{204}\text{Pb}$

Sample MS034

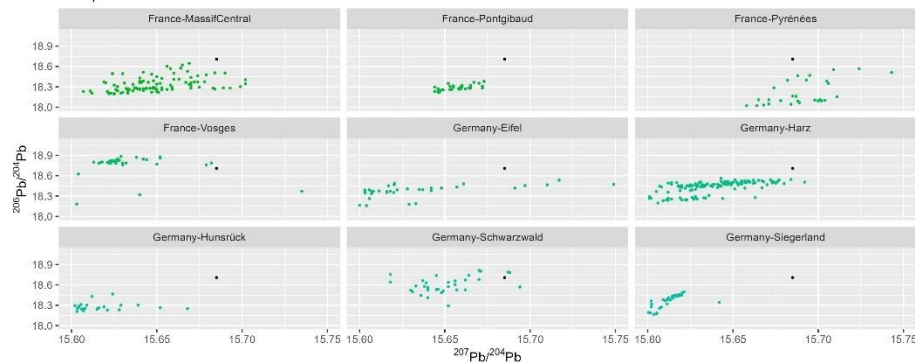

Sample MS034

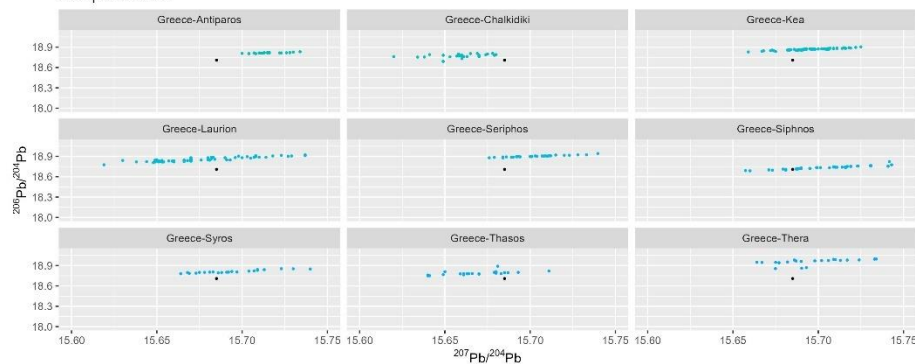

Sample MS034

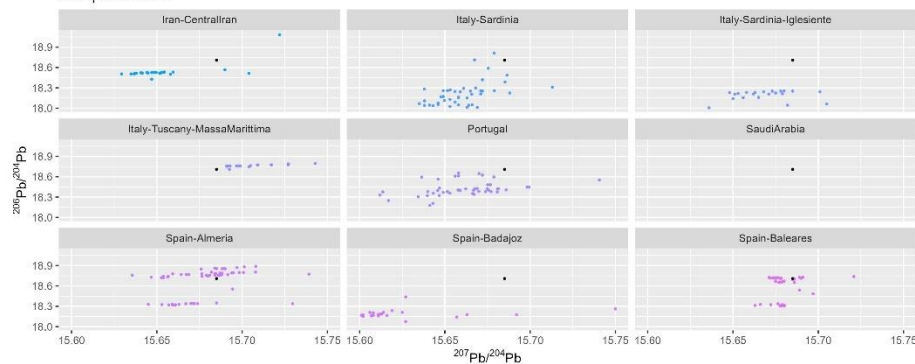

Sample MS034

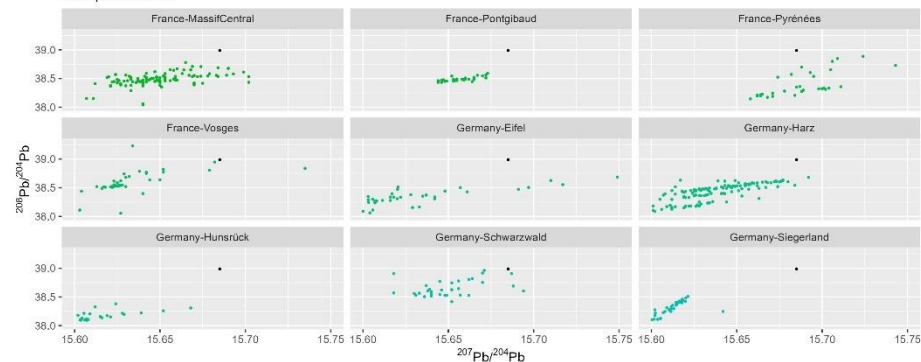

Sample MS034

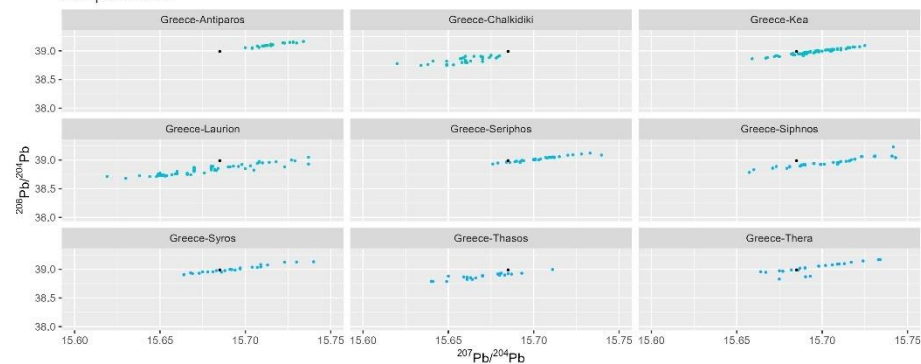

Sample MS034

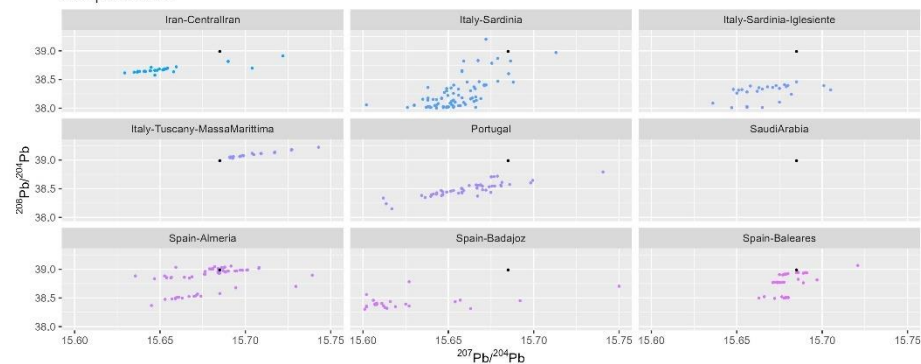

Sample MS034

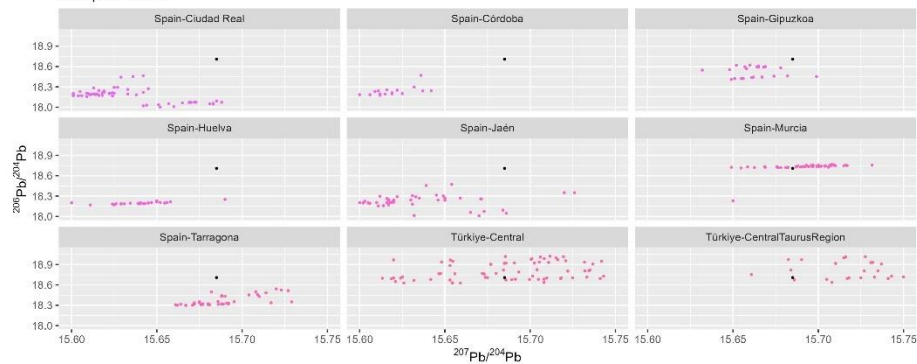

Sample MS034

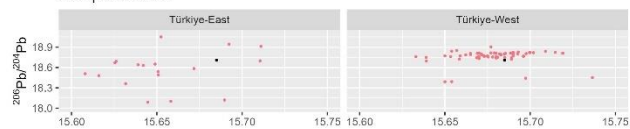

Sample MS034

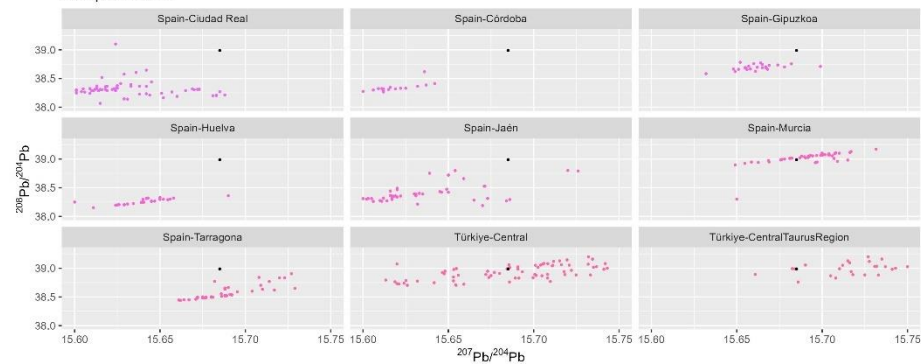

Sample MS034

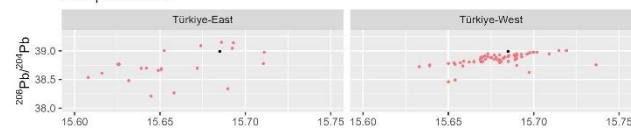

Sample MS035

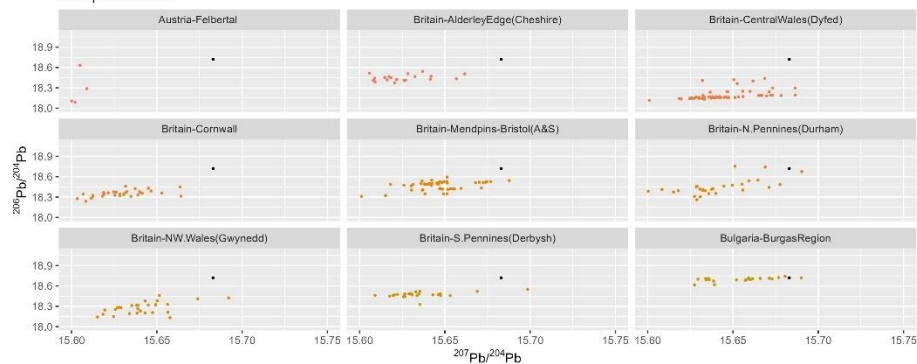

Sample MS035

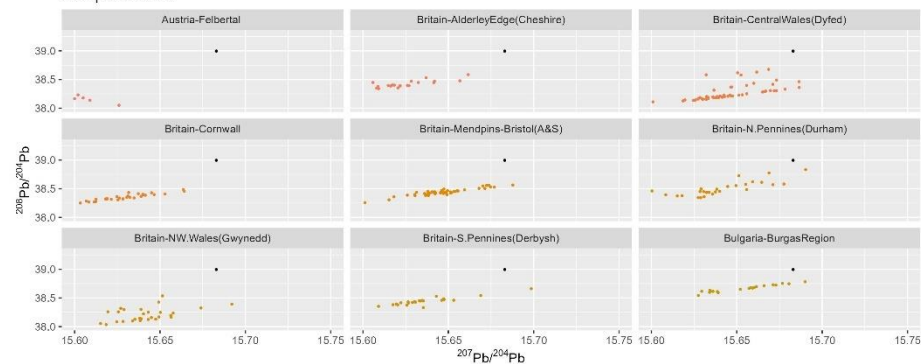



Sample MS035

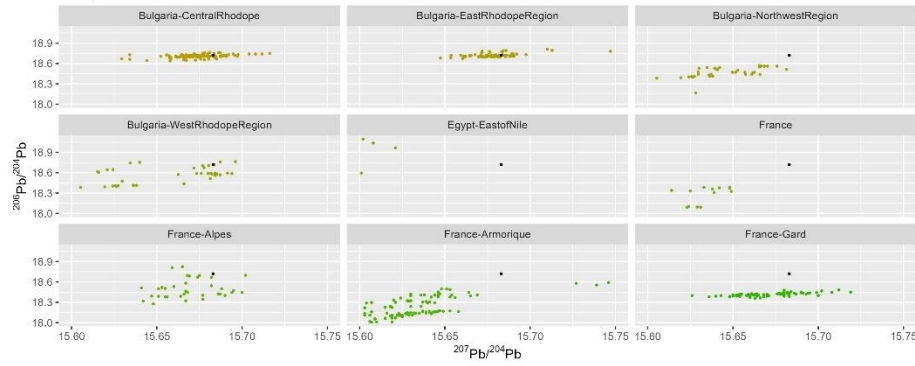

Sample MS035

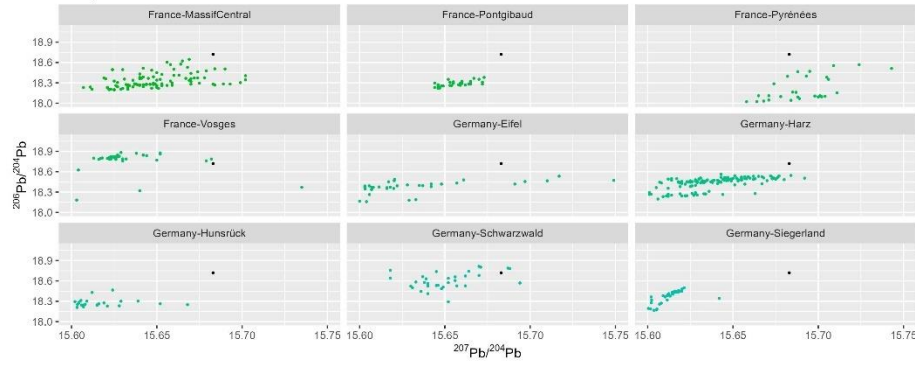

Sample MS035

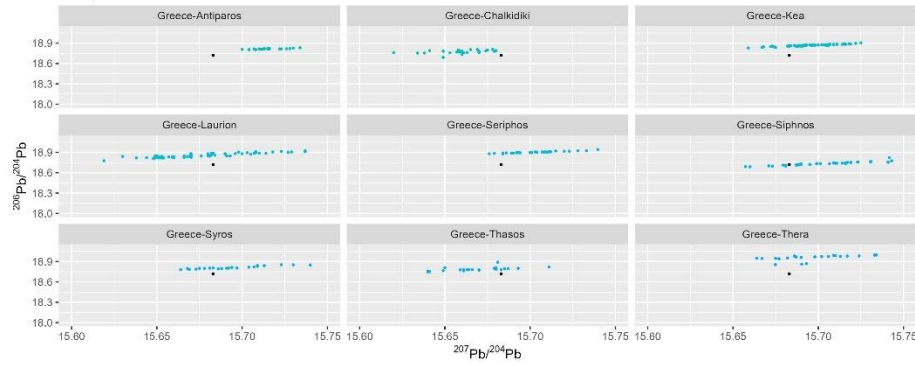

Sample MS035

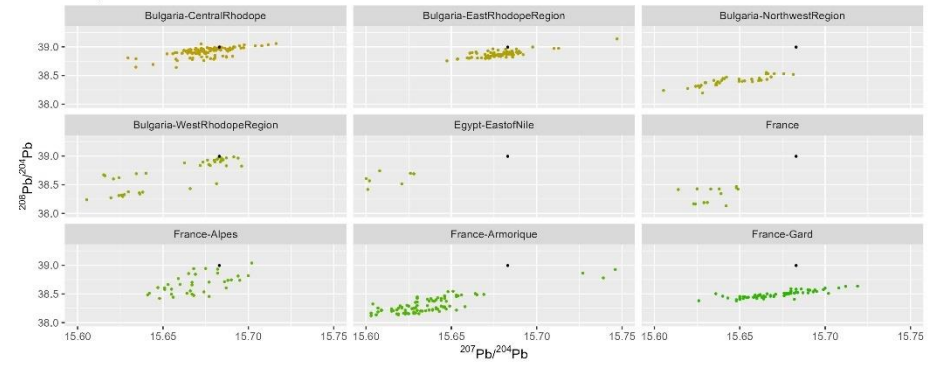

Sample MS035

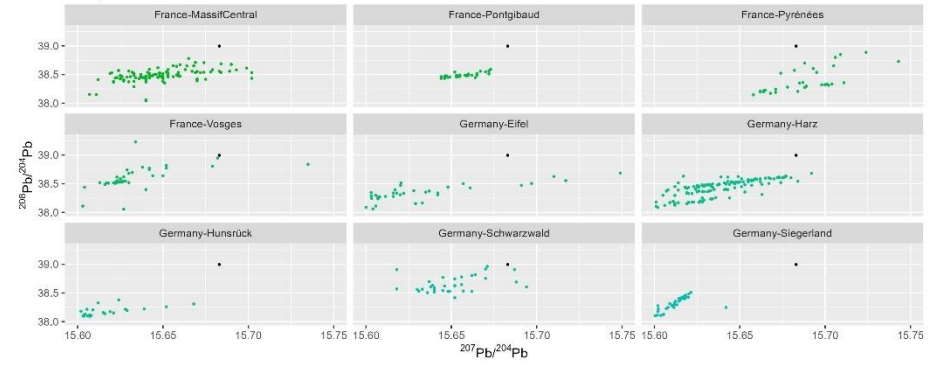

Sample MS035

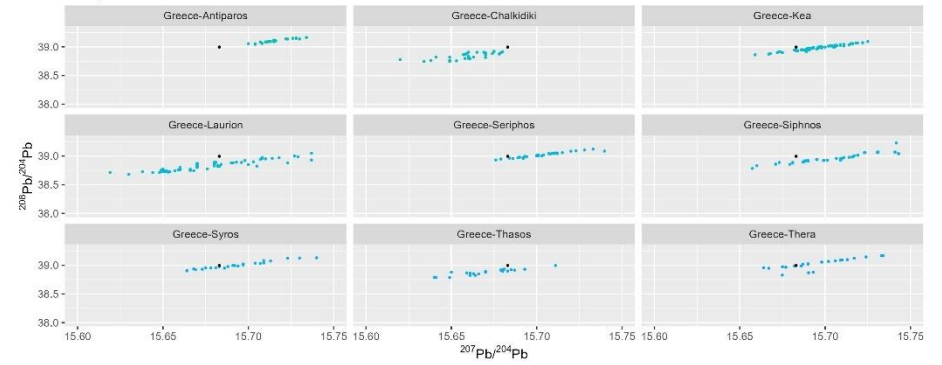



Sample MS035

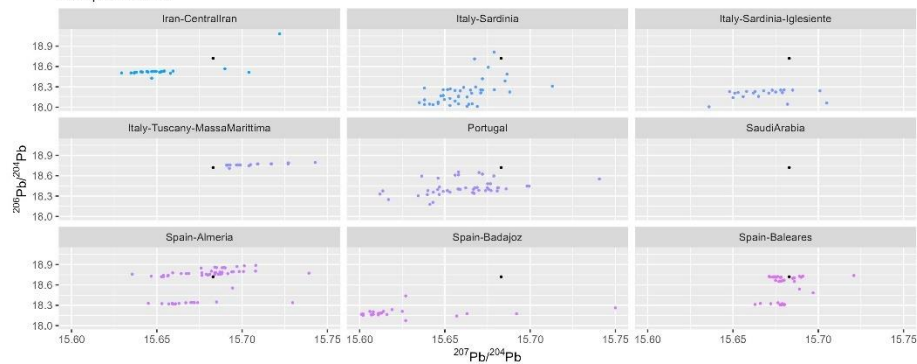

Sample MS035

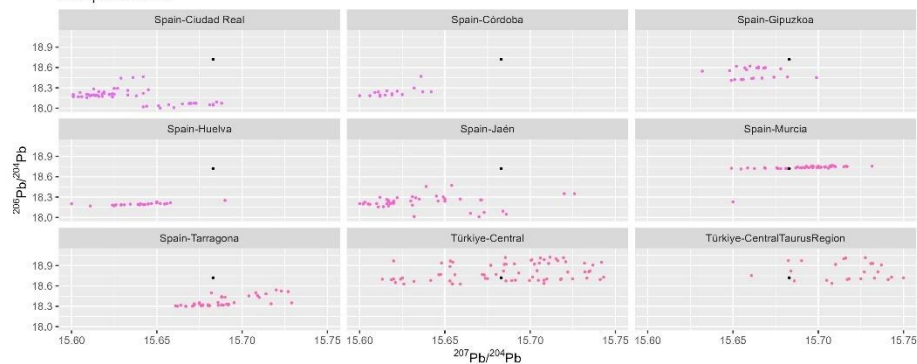

Sample MS035

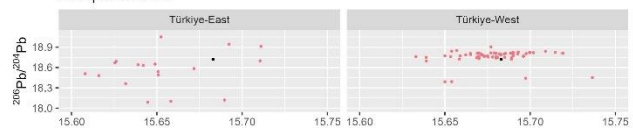

$^{207}\text{Pb}/^{204}\text{Pb}$

Sample MS035

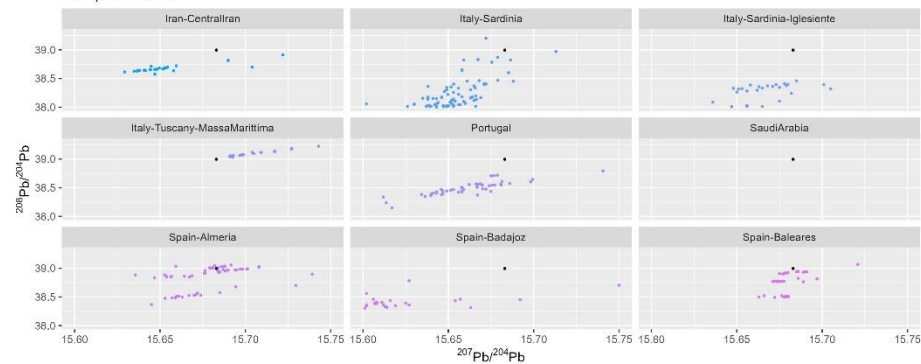

Sample MS035

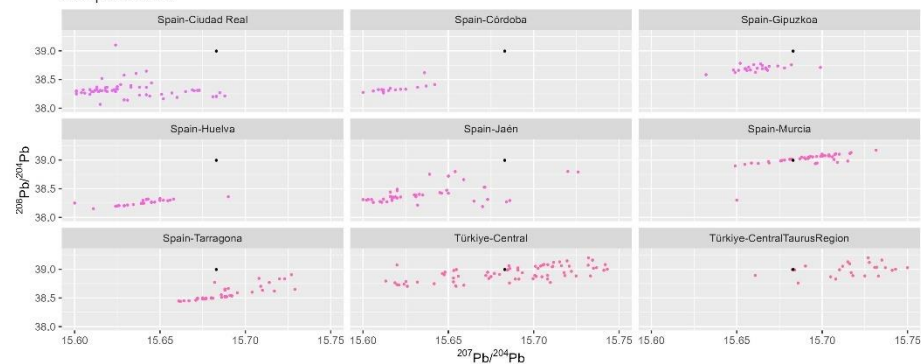

Sample MS035

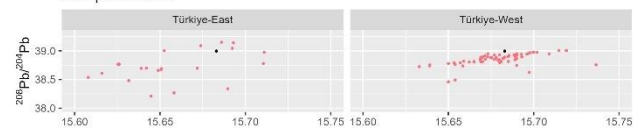

$^{207}\text{Pb}/^{204}\text{Pb}$

Sample MS036

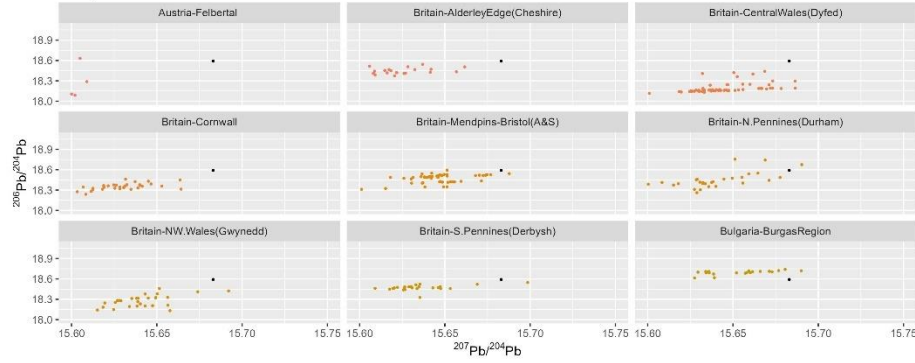

Sample MS036

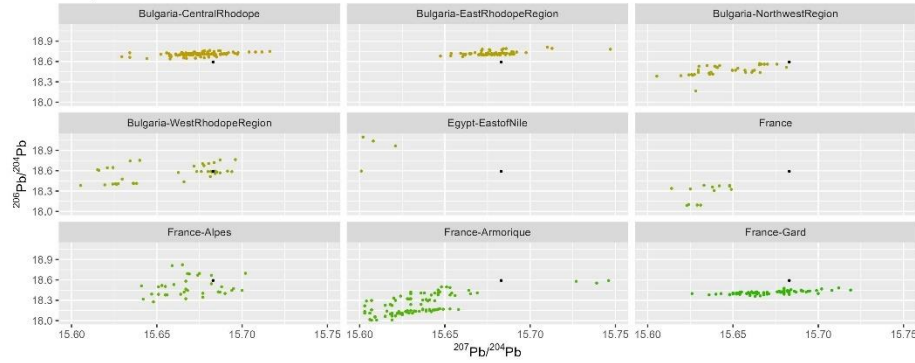

Sample MS036

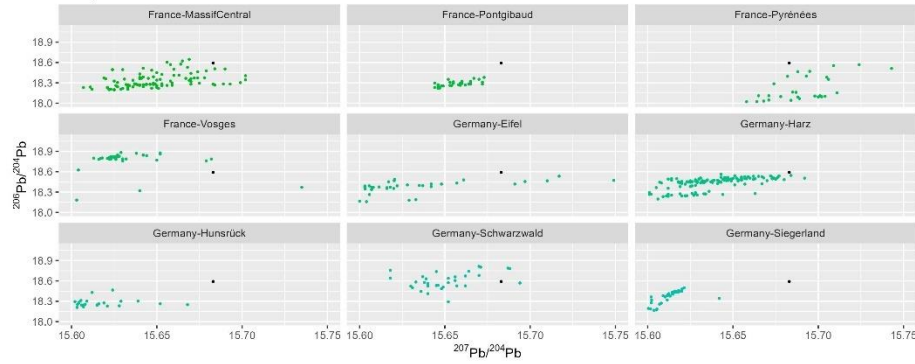

Sample MS036

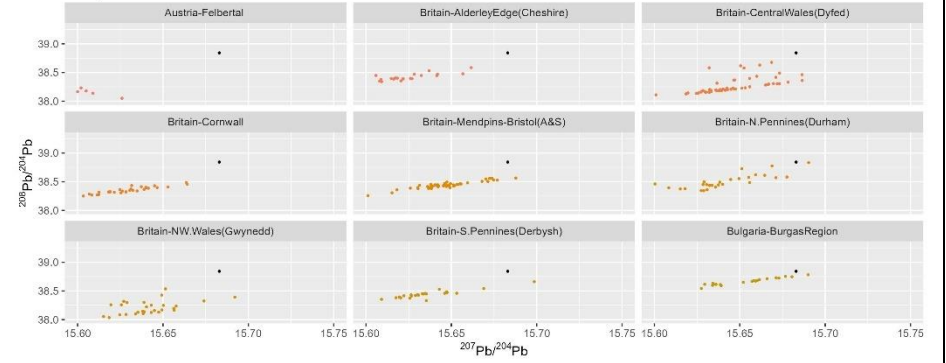

Sample MS036

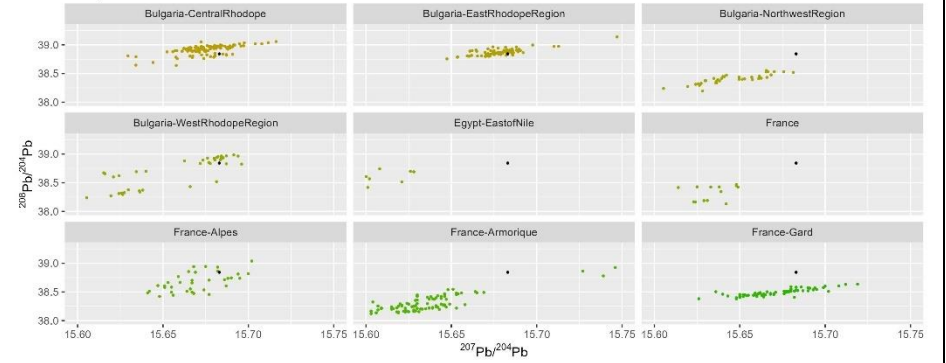

Sample MS036

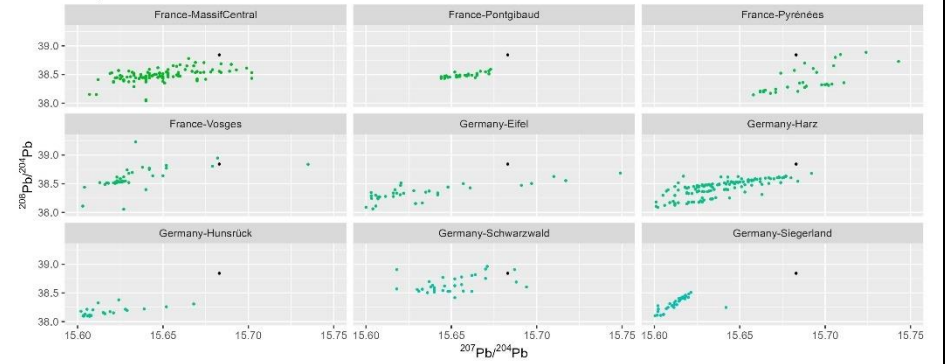

Sample MS036

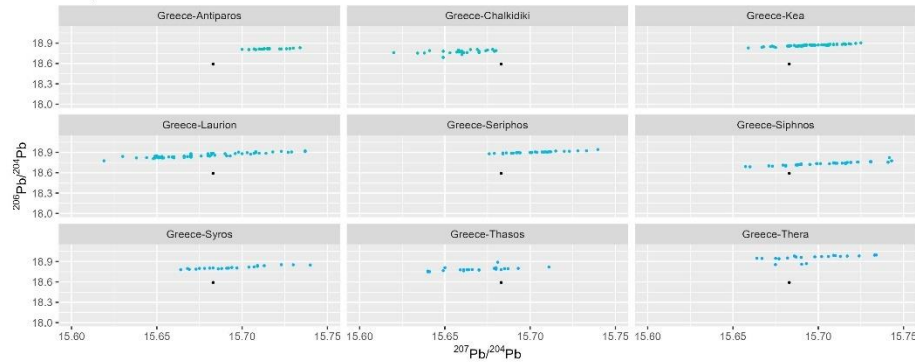

Sample MS036

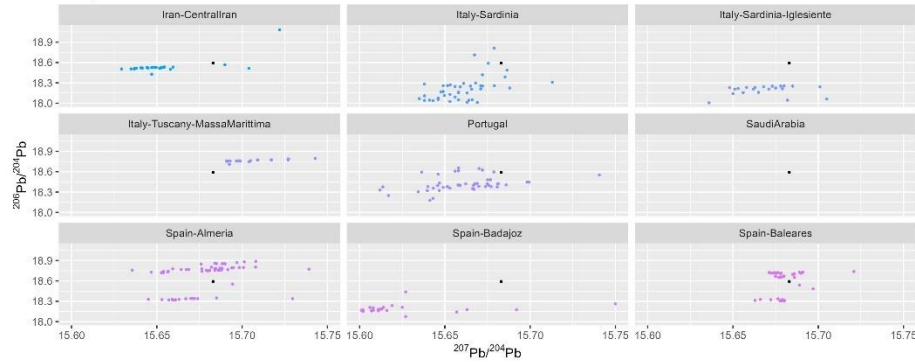

Sample MS036

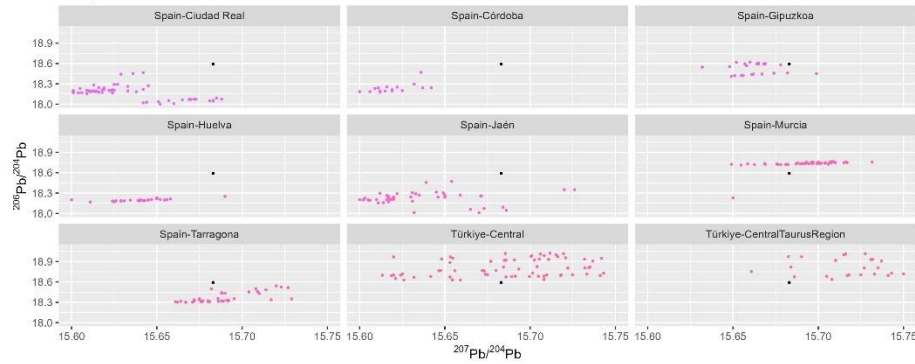

Sample MS036

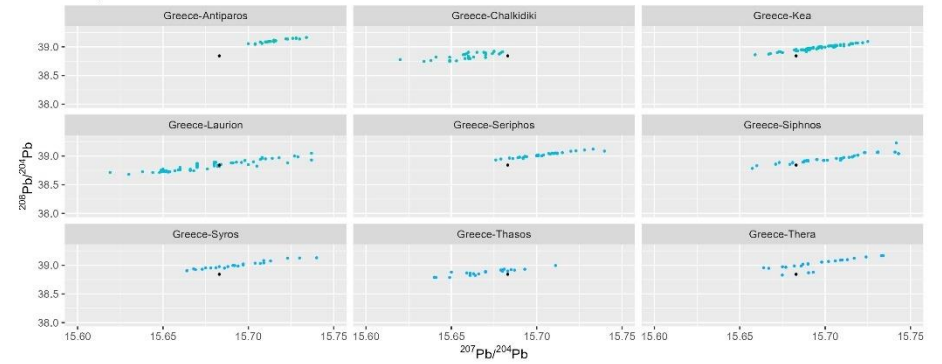

Sample MS036

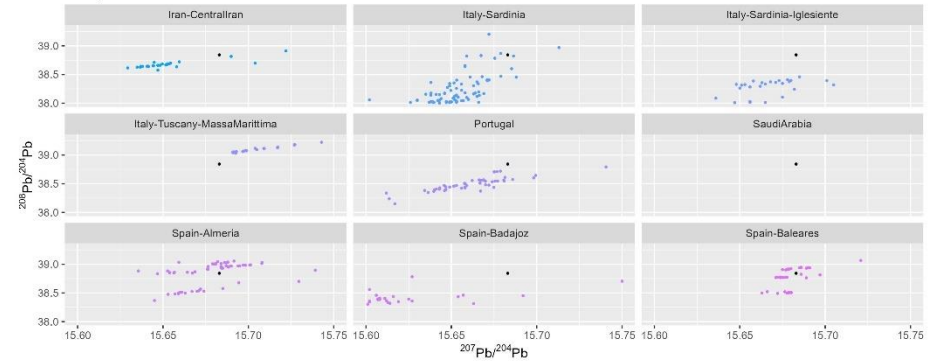

Sample MS036

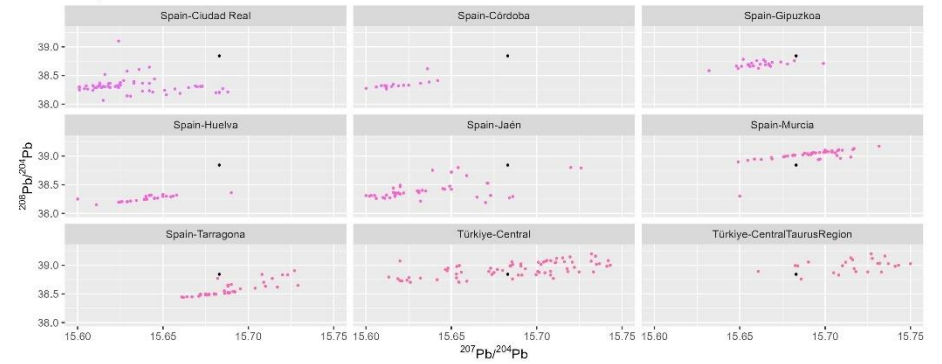

Sample MS036

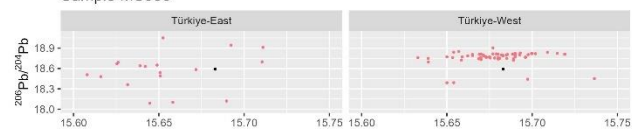

Sample MS036

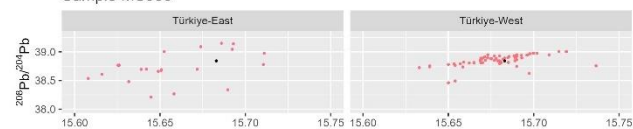 $^{207}\text{Pb}/^{204}\text{Pb}$ 

Sample MS037

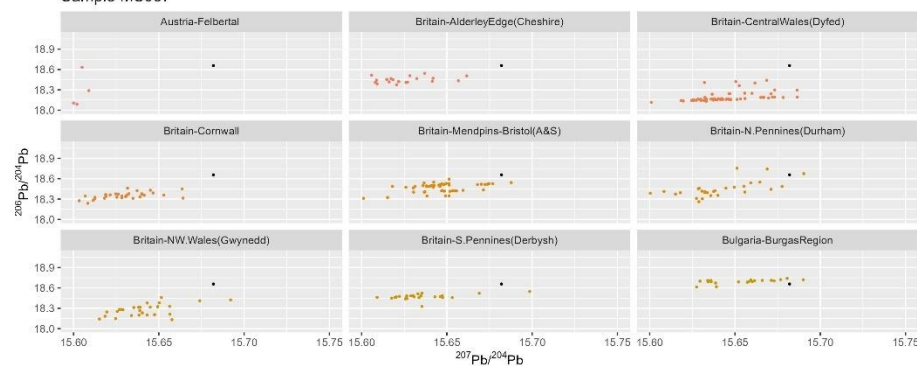 $^{207}\text{Pb}/^{204}\text{Pb}$ 

Sample MS037

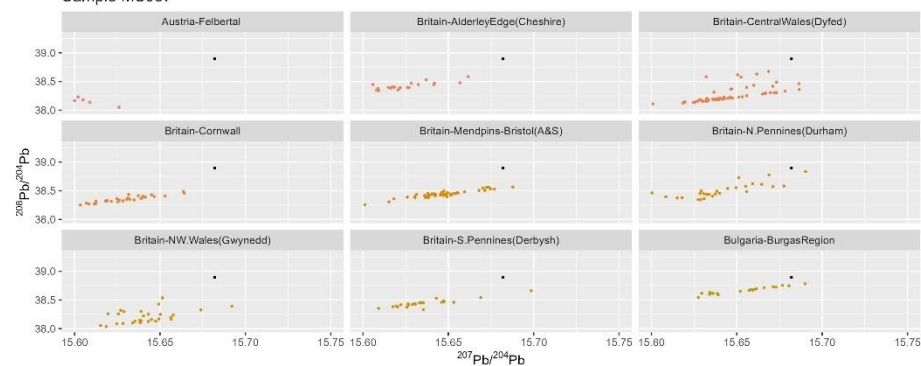

Sample MS037

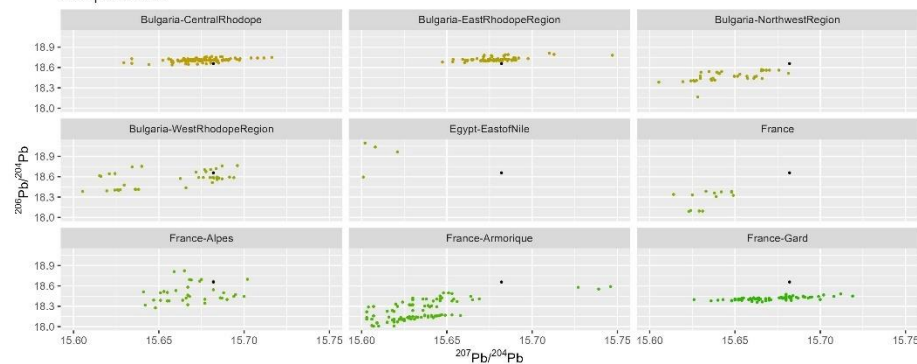

Sample MS037

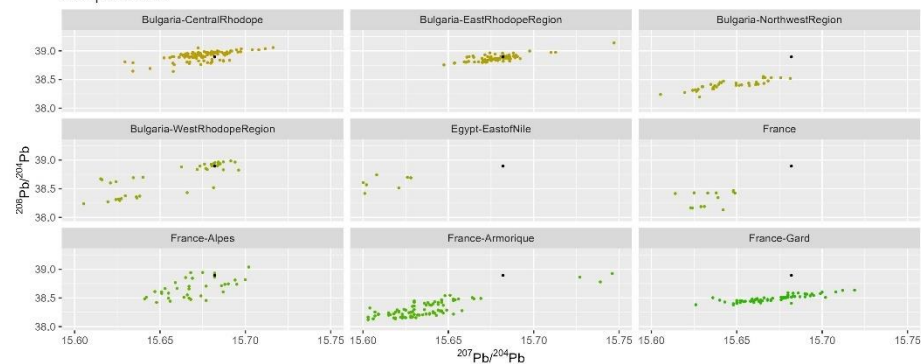



Sample MS037

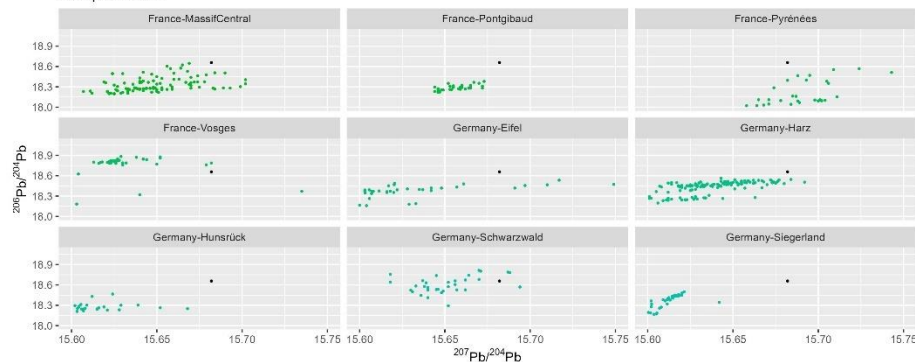

Sample MS037

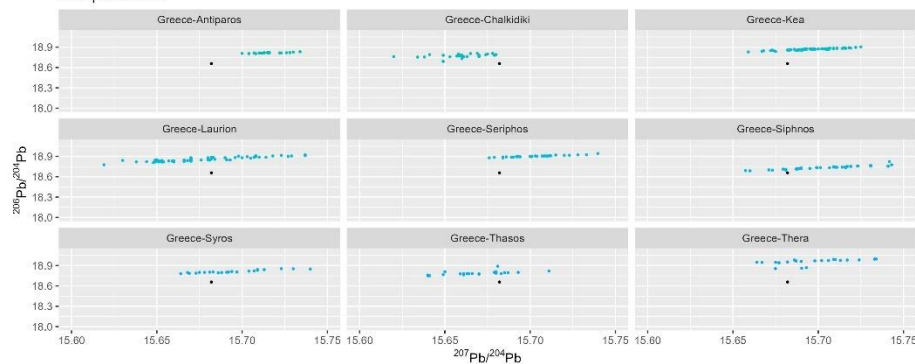

Sample MS037

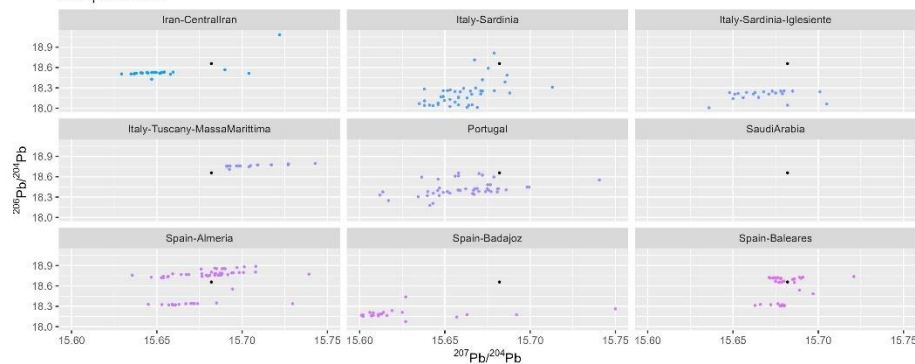

Sample MS037

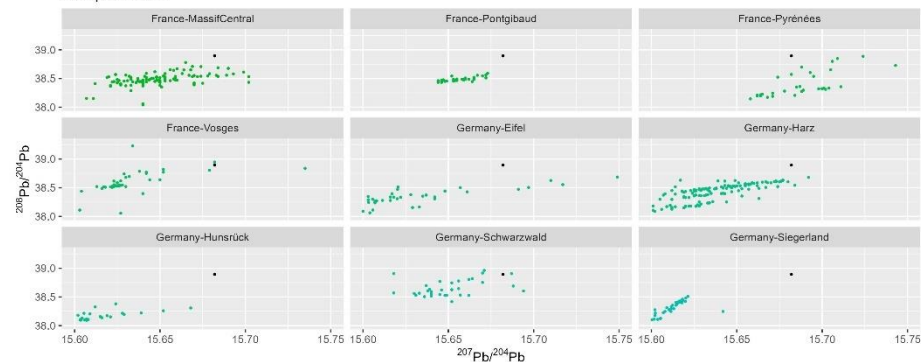

Sample MS037

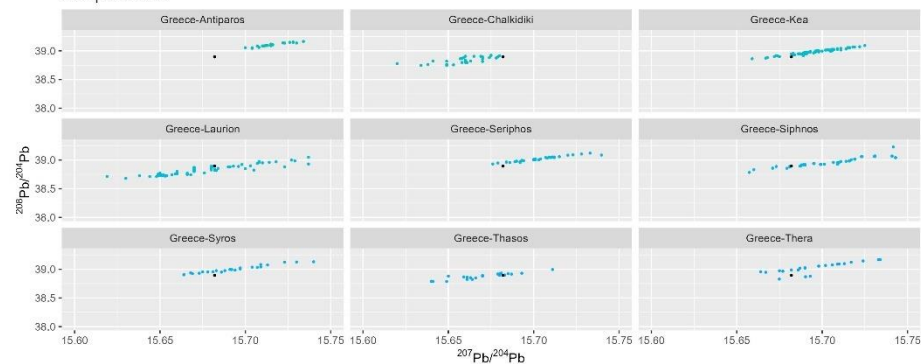

Sample MS037

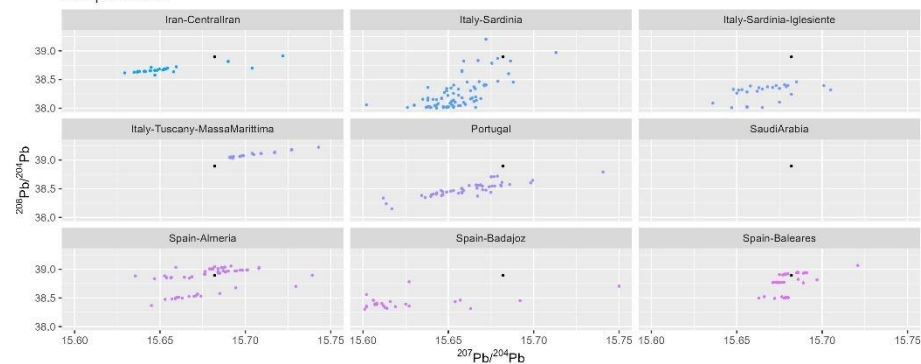



Sample MS037

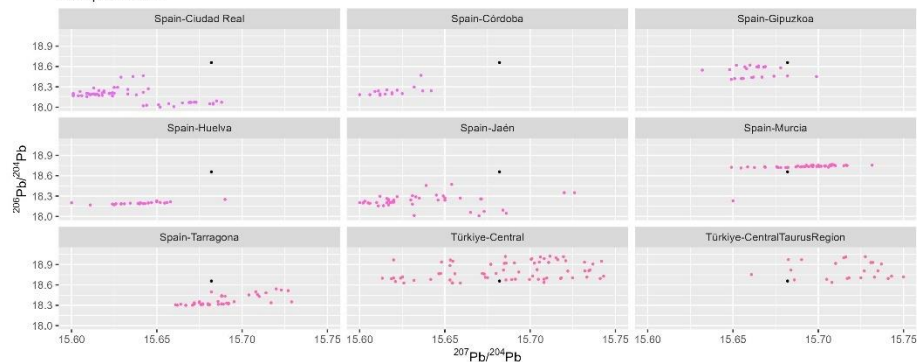

Sample MS037

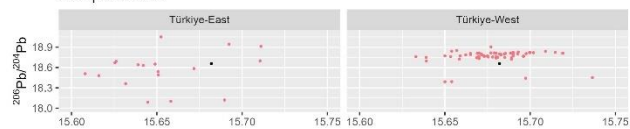

Sample MS037

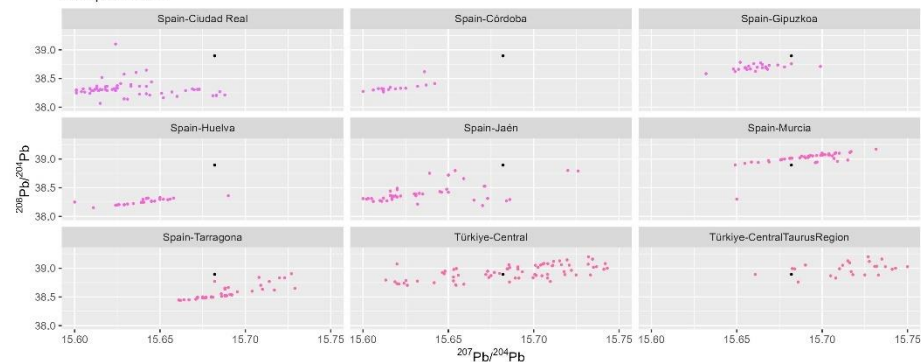

Sample MS037

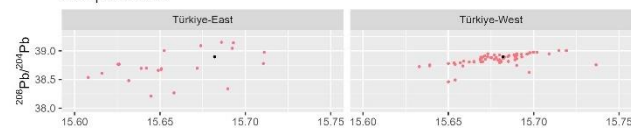

207Pb/204Pb

Sample MS038

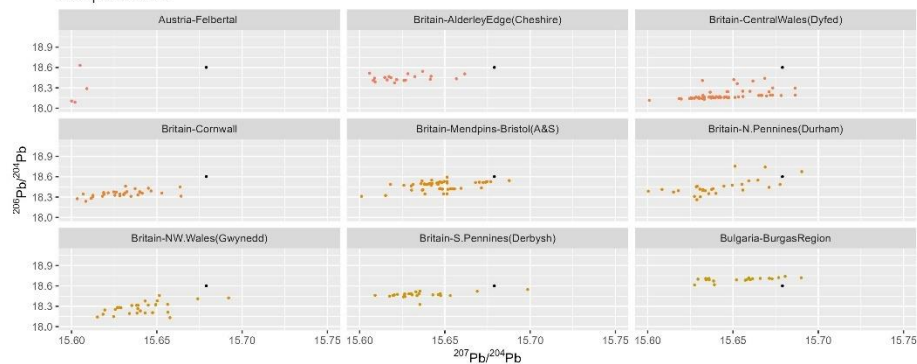

207Pb/204Pb

Sample MS038

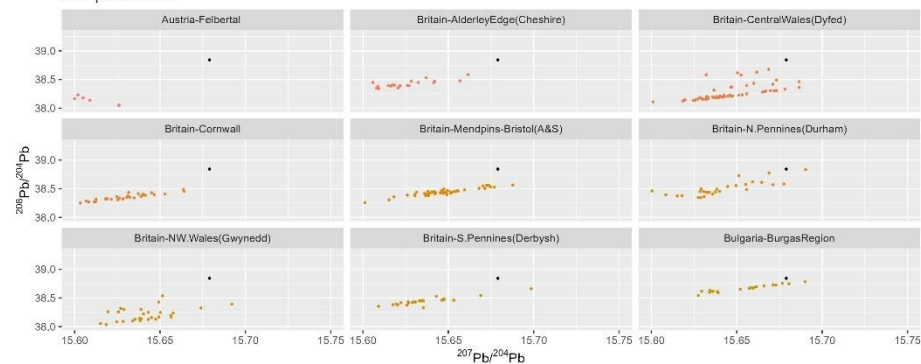

Sample MS038

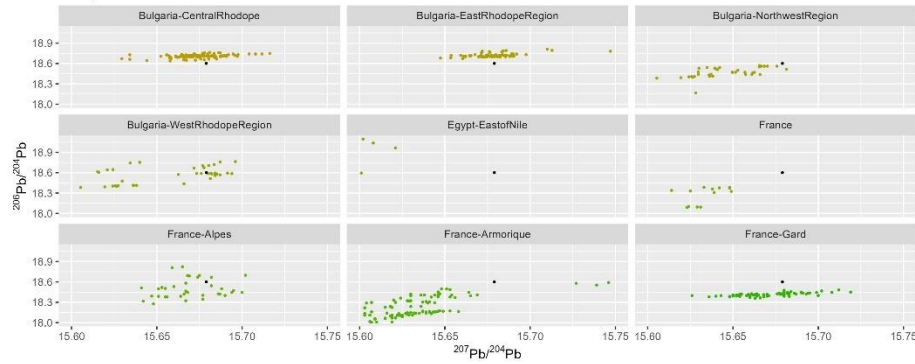

Sample MS038

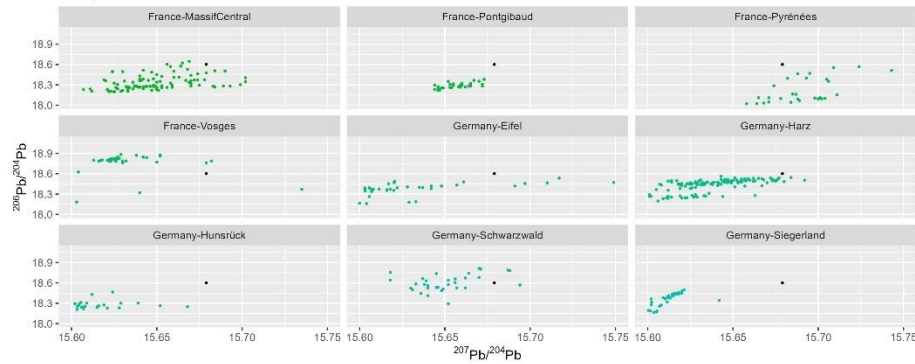

Sample MS038

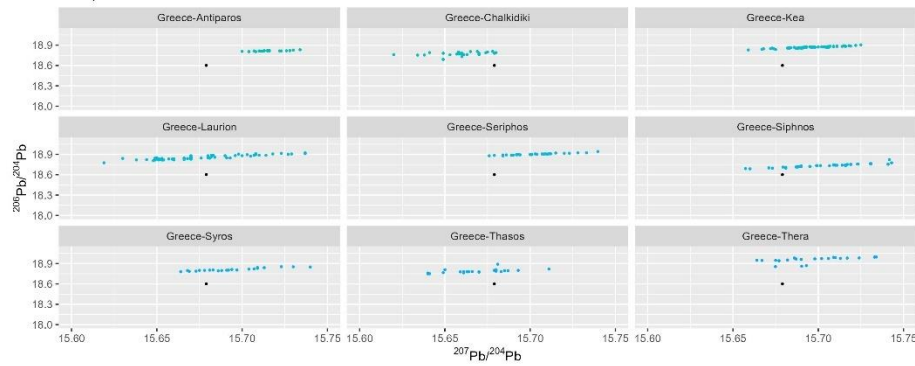

Sample MS038

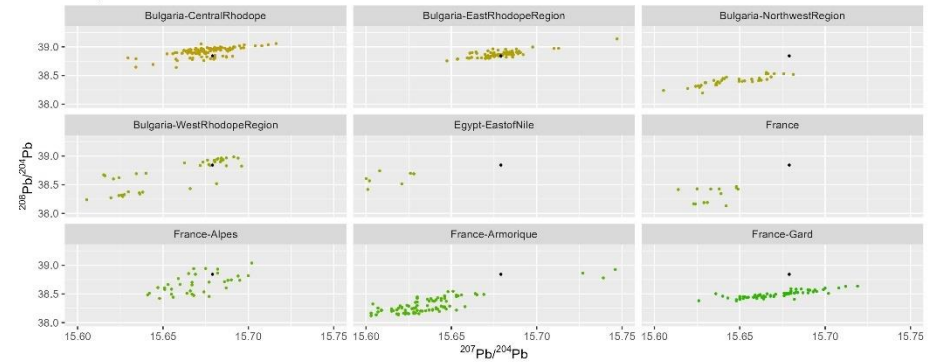

Sample MS038

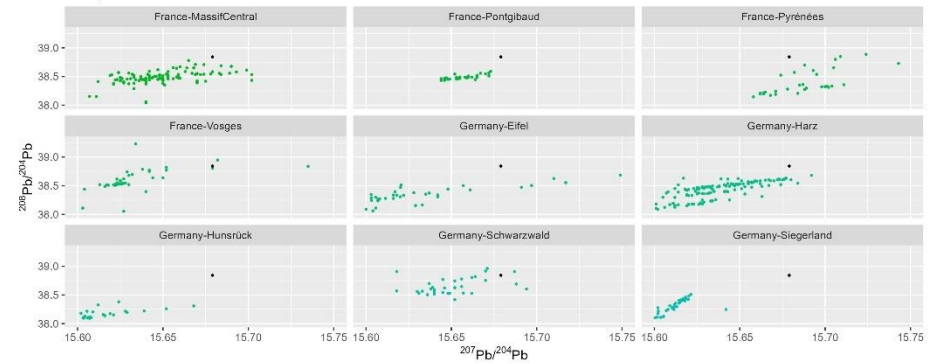

Sample MS038

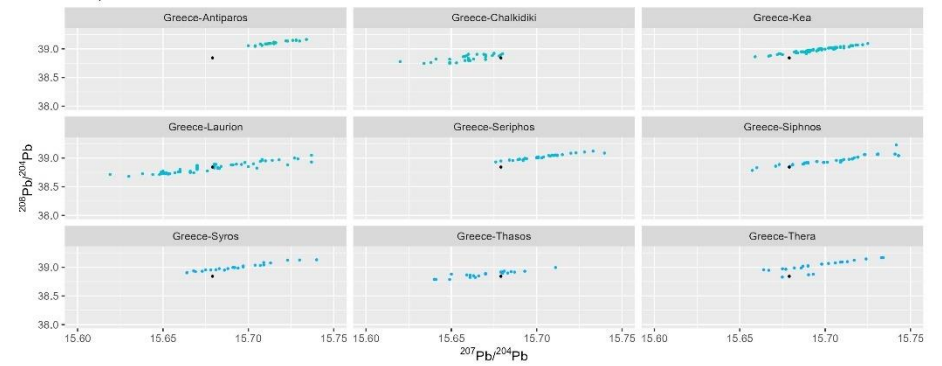

Sample MS038

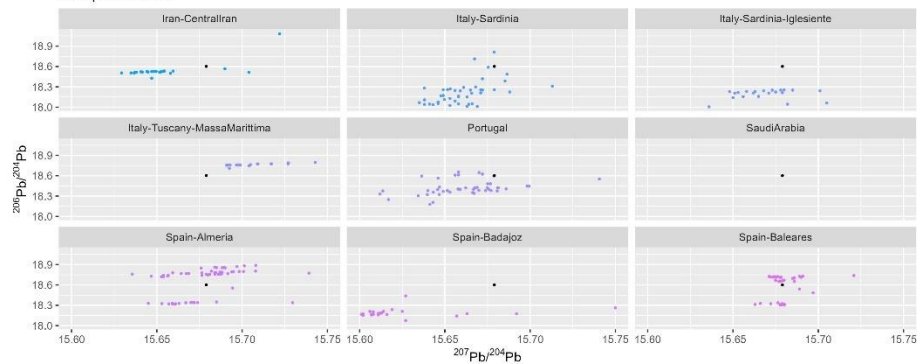

Sample MS038

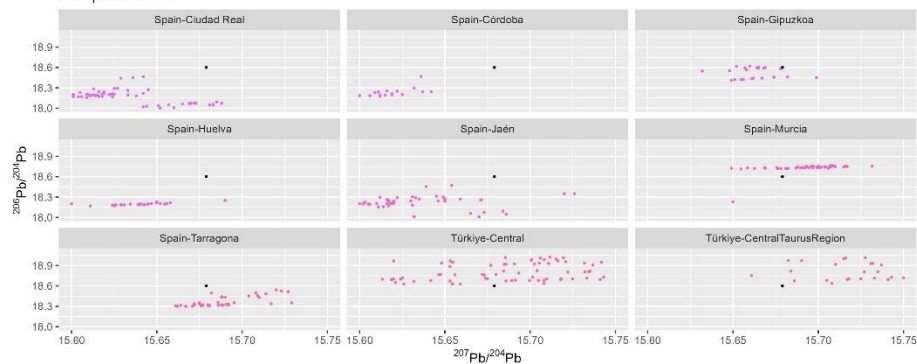

Sample MS038

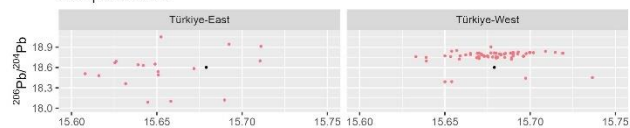

$^{207}\text{Pb}/^{204}\text{Pb}$

Sample MS038

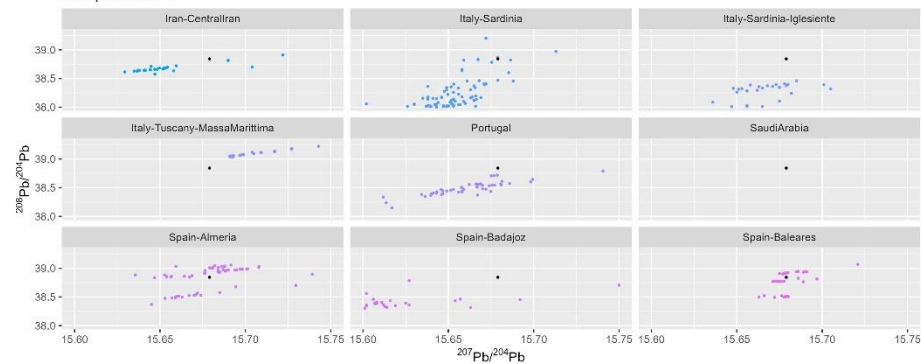

Sample MS038

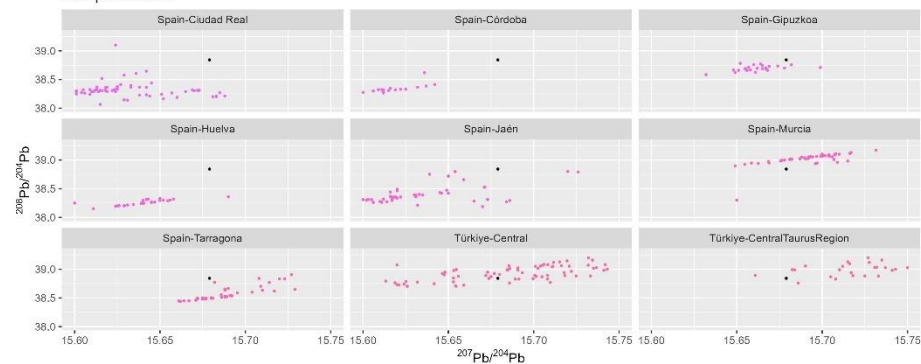

Sample MS038

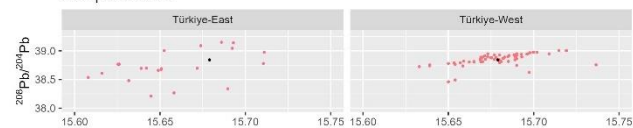

$^{207}\text{Pb}/^{204}\text{Pb}$

Sample MS039

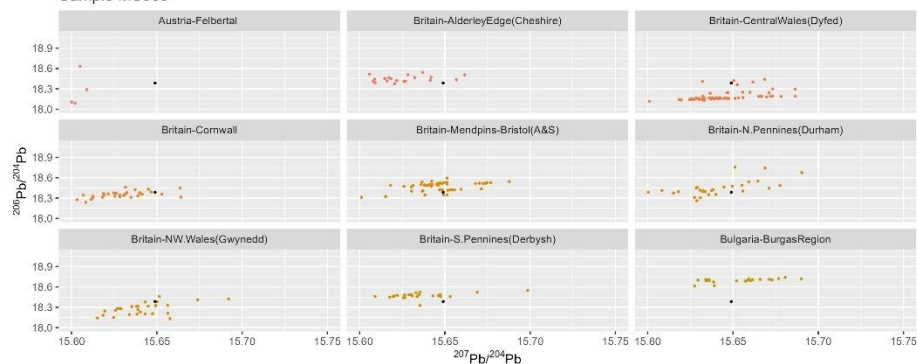

Sample MS039

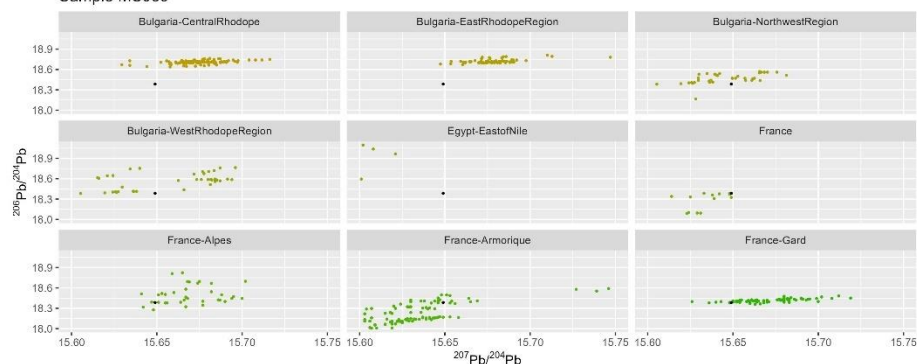

Sample MS039

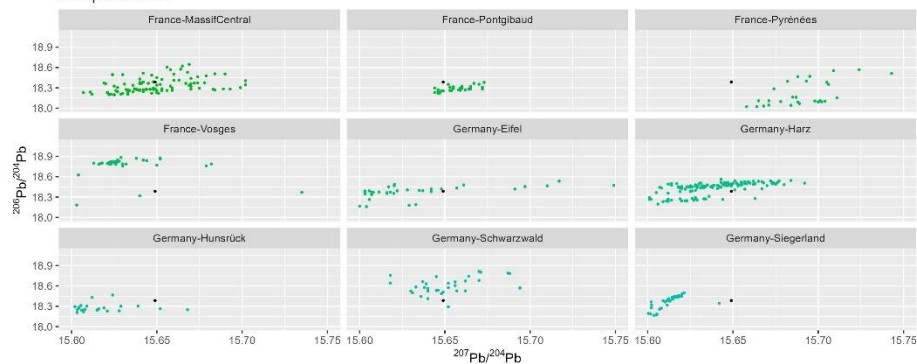

Sample MS039

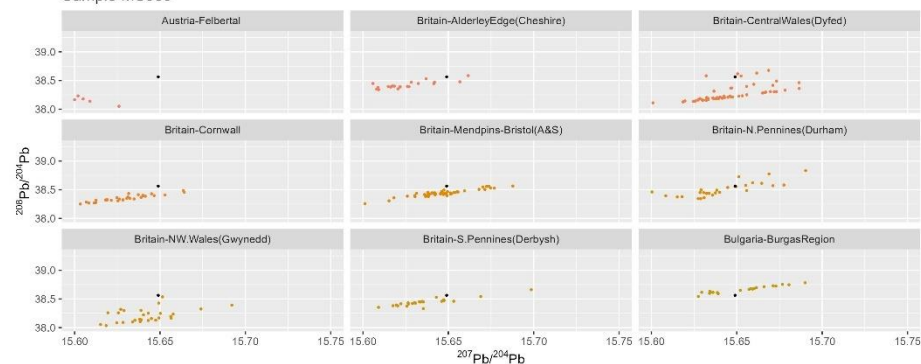

Sample MS039

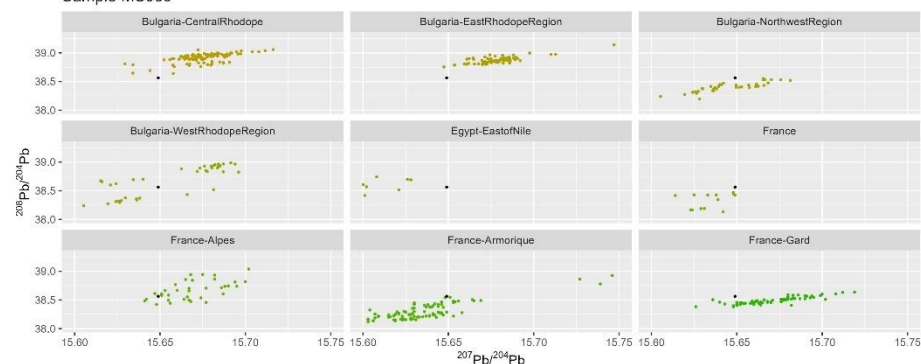

Sample MS039

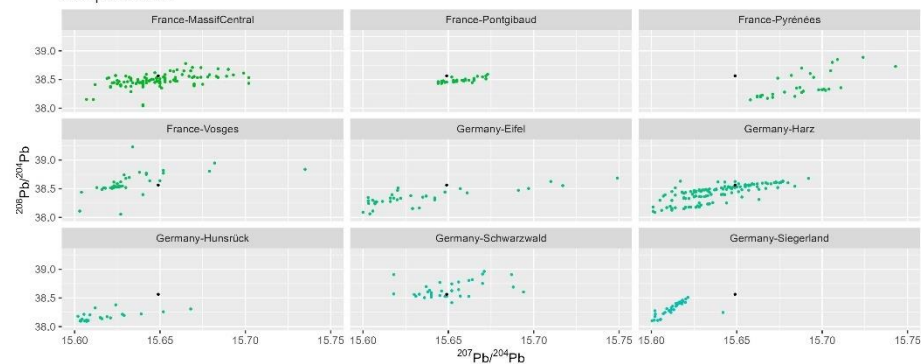



Sample MS039

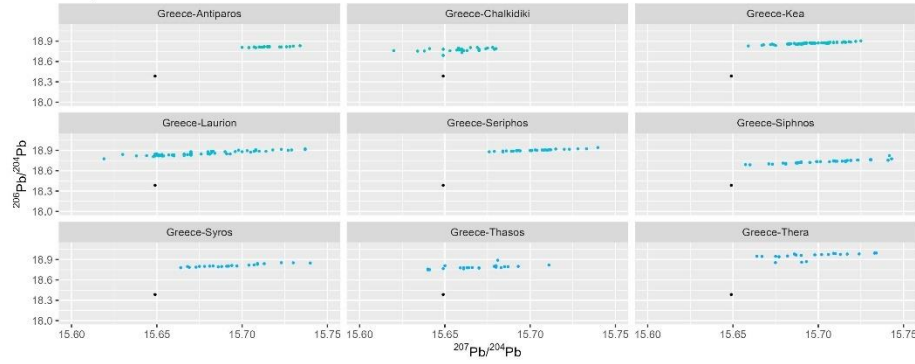

Sample MS039

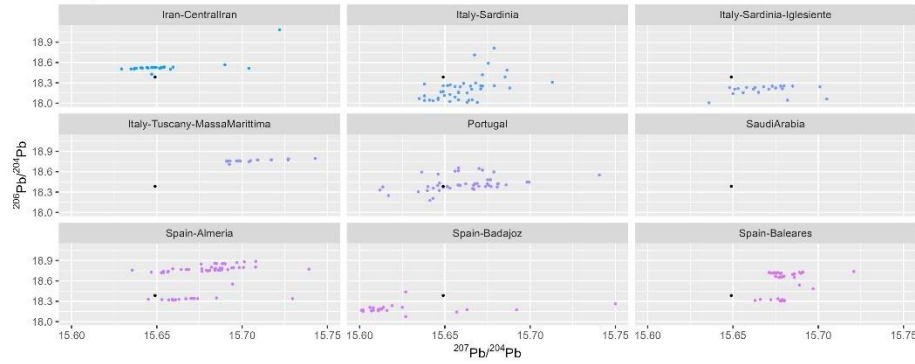

Sample MS039

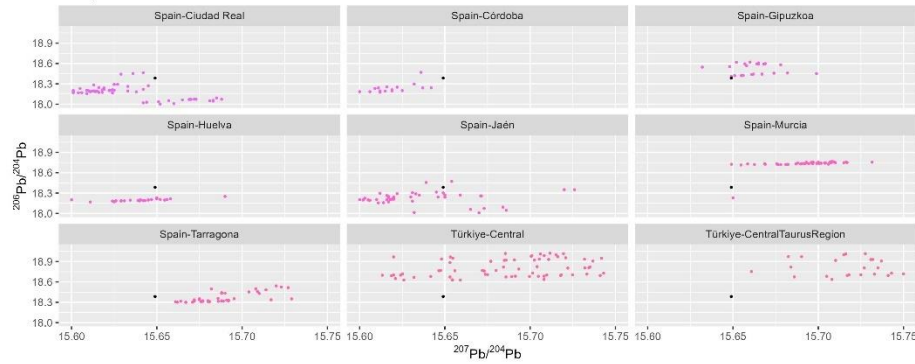

Sample MS039

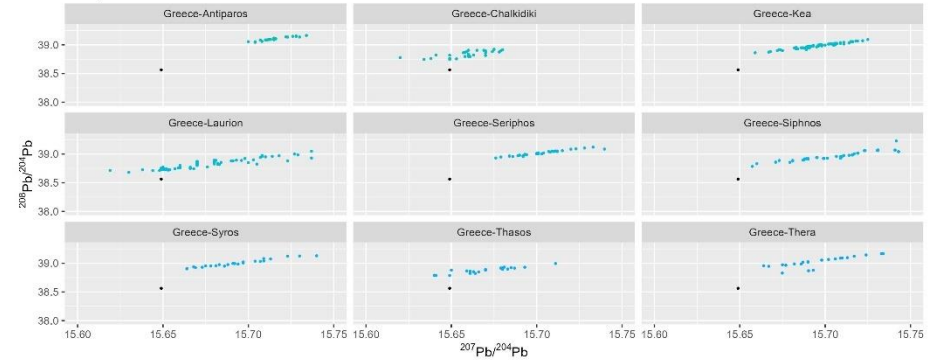

Sample MS039

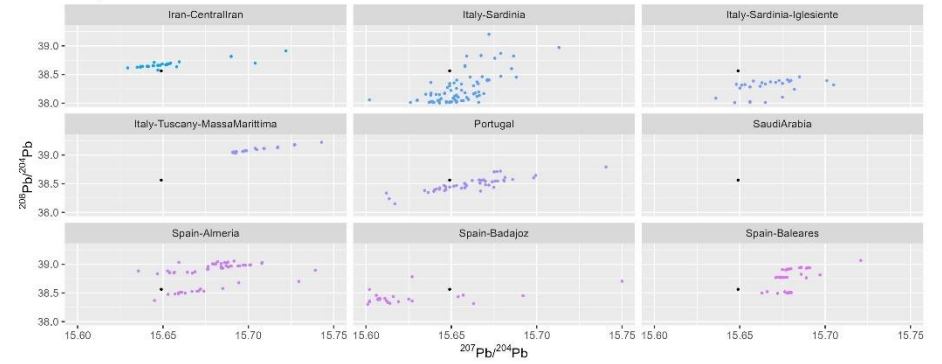

Sample MS039

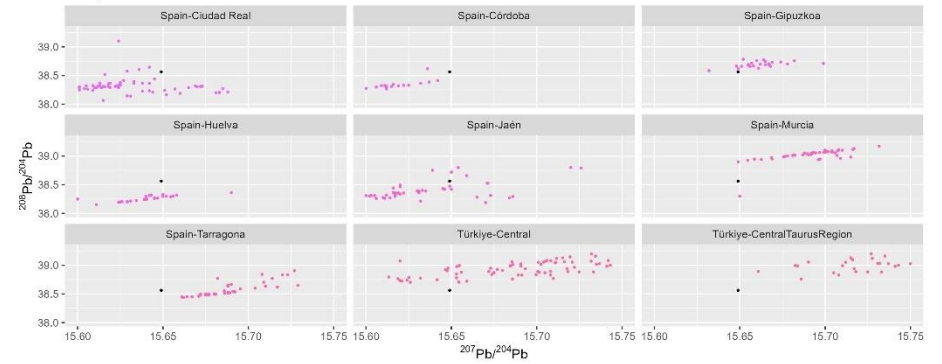



Sample MS039

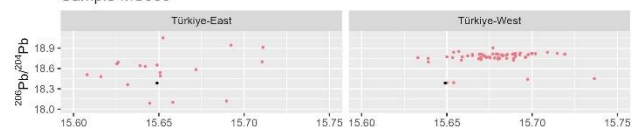

Sample MS039

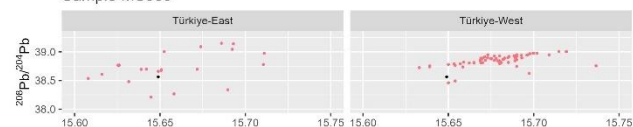

Sample MS040

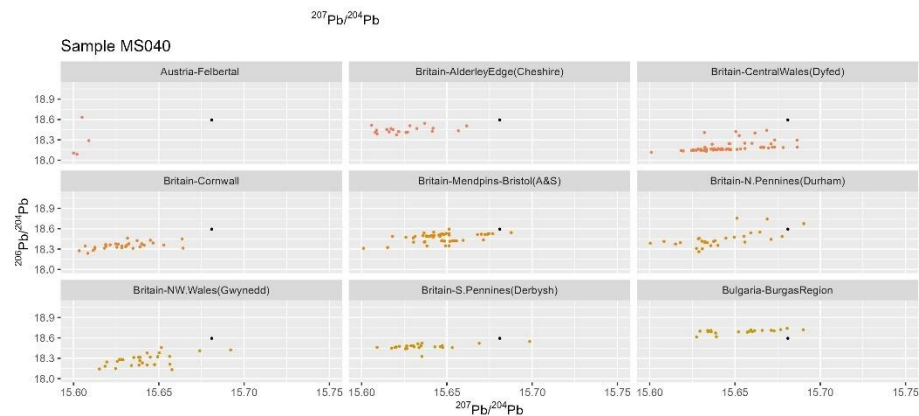

Sample MS040

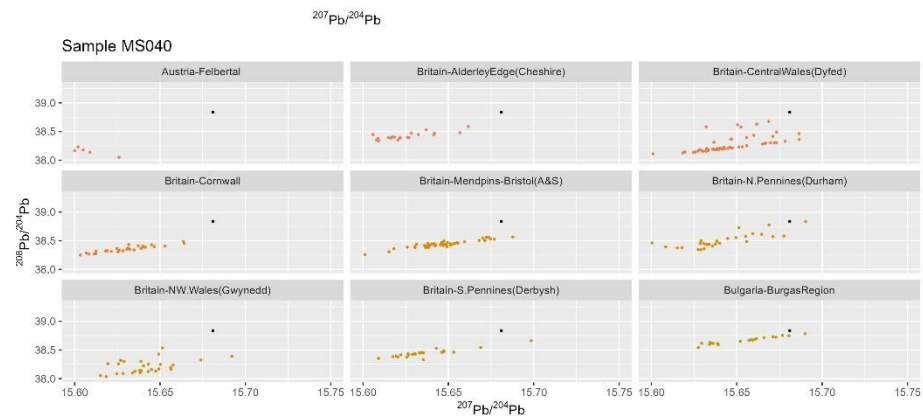

Sample MS040

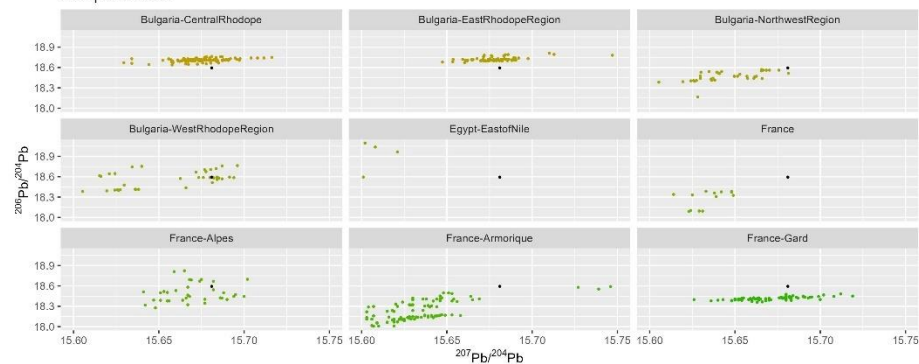

Sample MS040

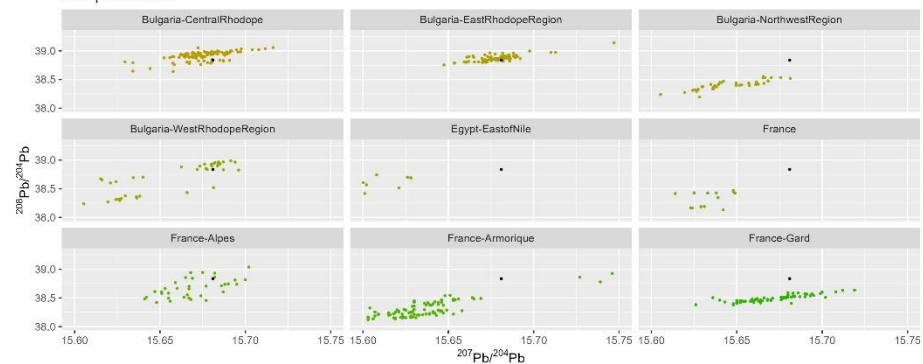

Sample MS040

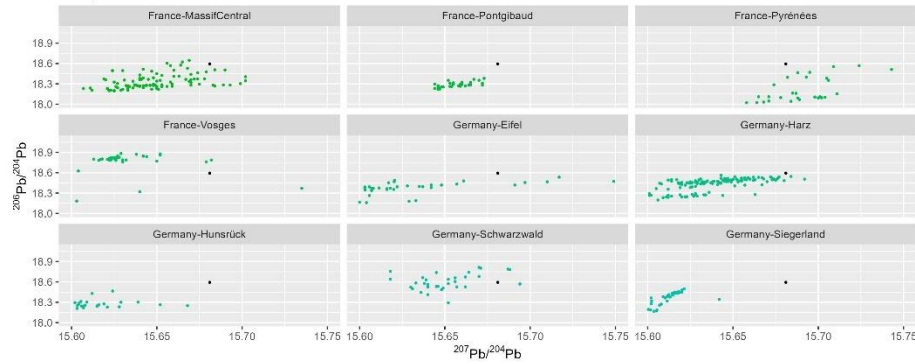

Sample MS040

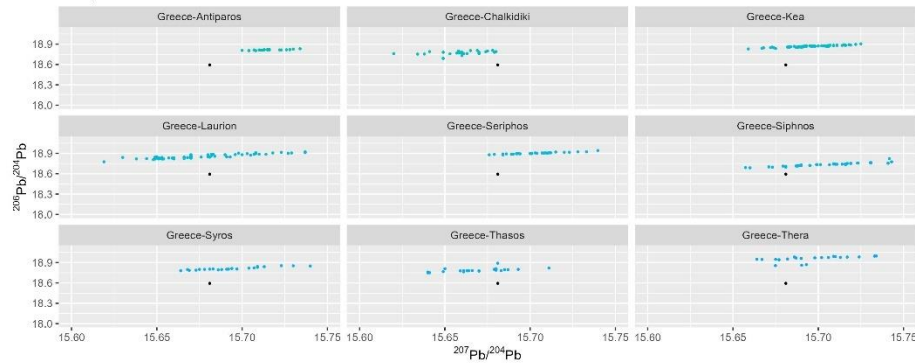

Sample MS040

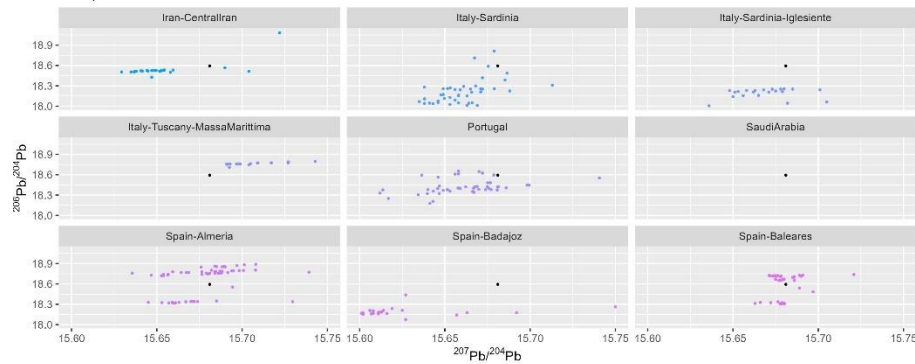

Sample MS040

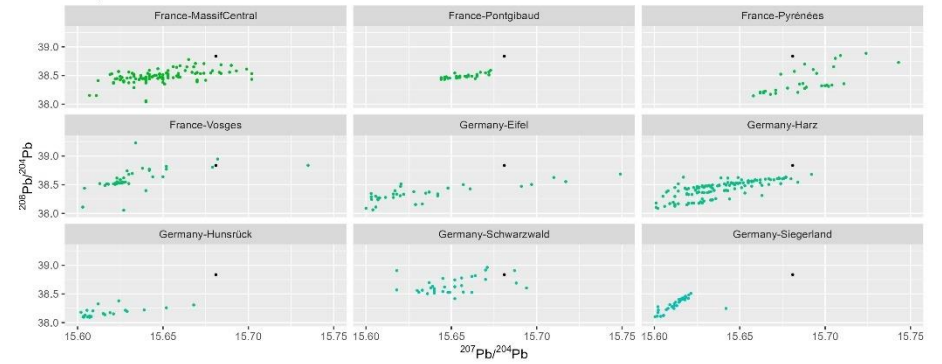

Sample MS040

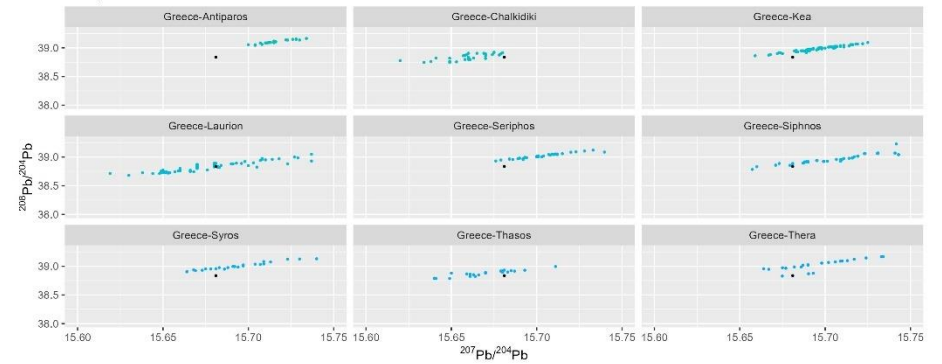

Sample MS040

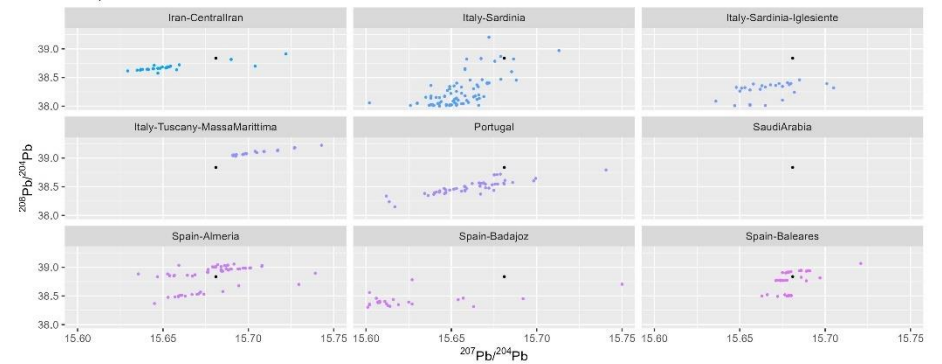

Sample MS040

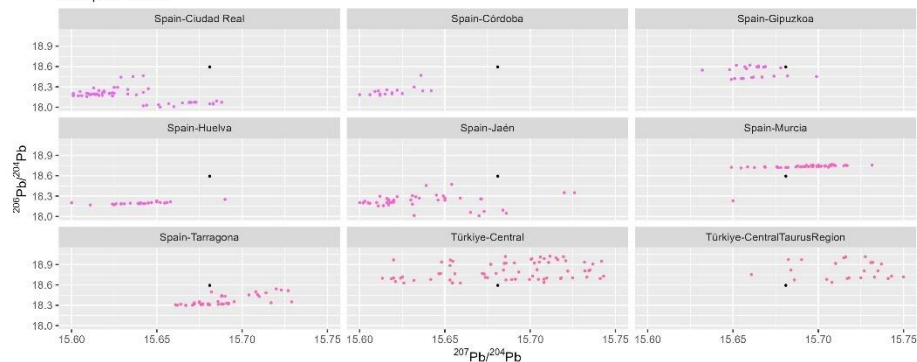

Sample MS040

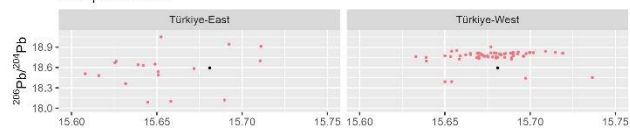

207Pb/204Pb

Sample MS041

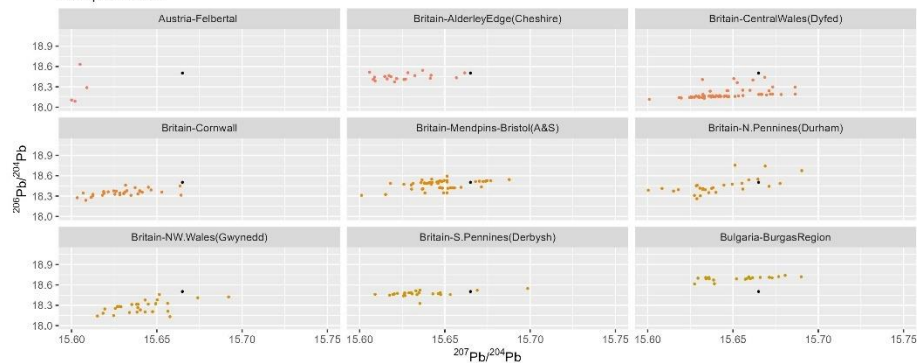

Sample MS040

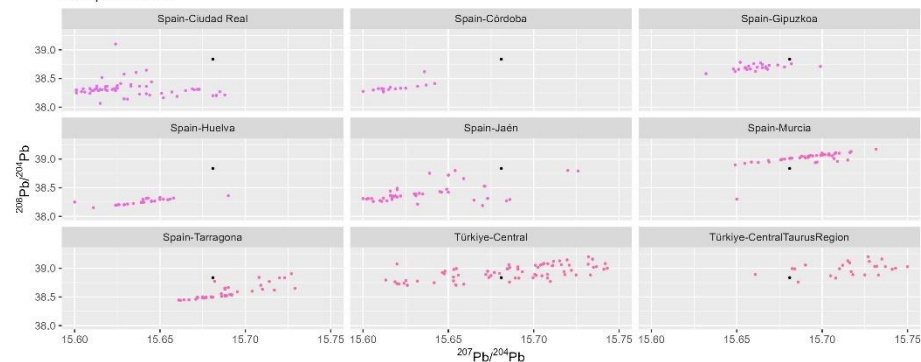

Sample MS040

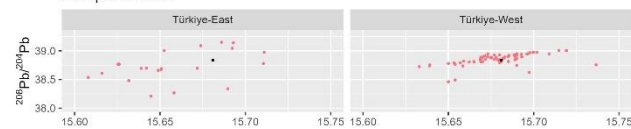

207Pb/204Pb

Sample MS041

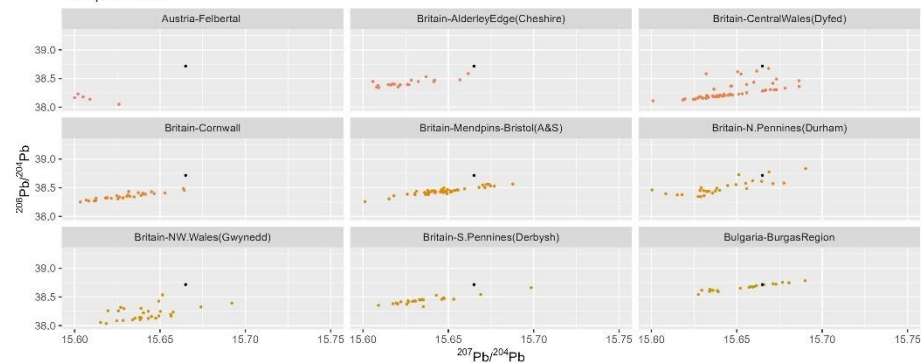

Sample MS041

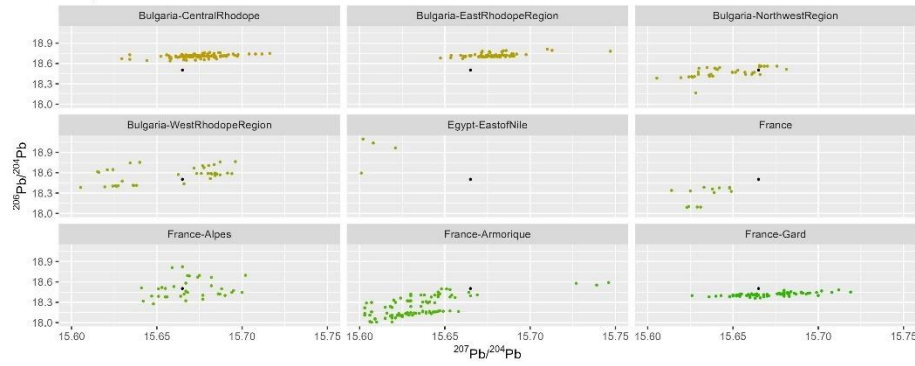

Sample MS041

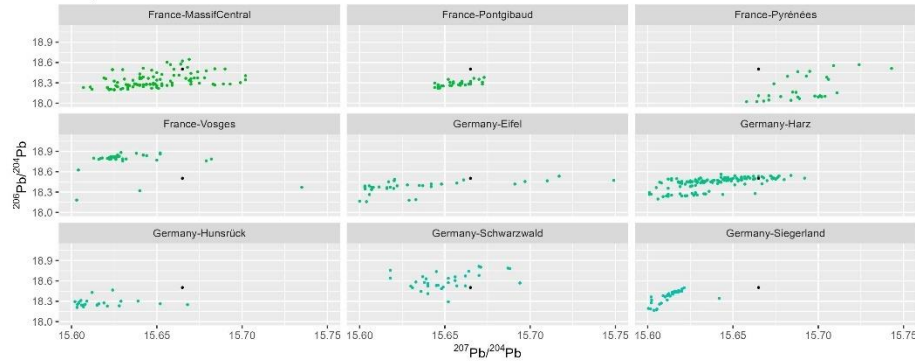

Sample MS041

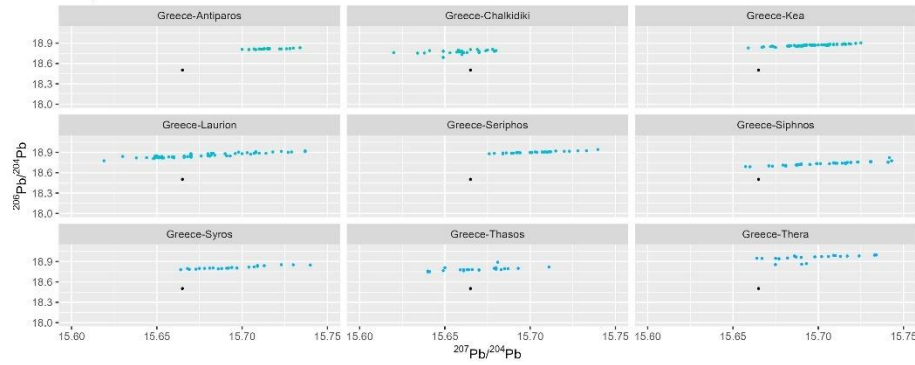

Sample MS041

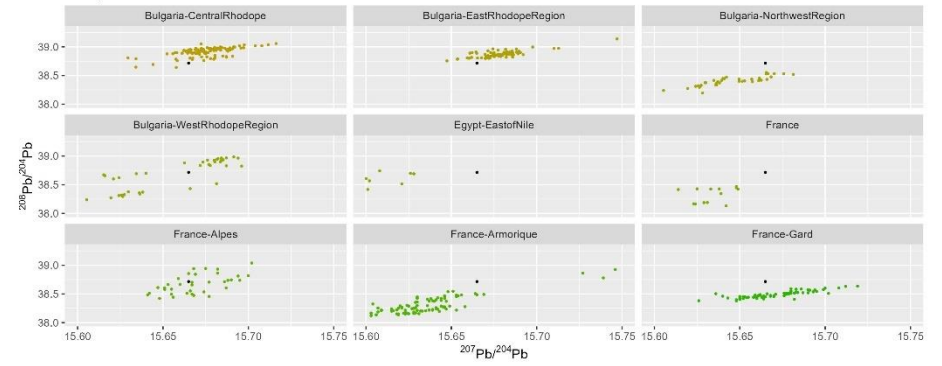

Sample MS041

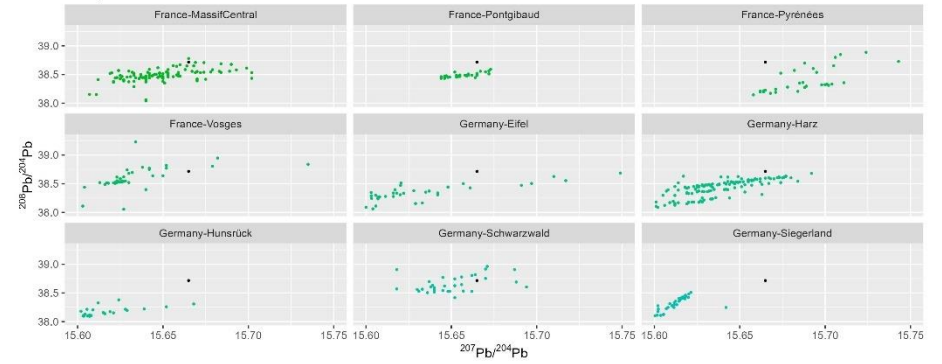

Sample MS041

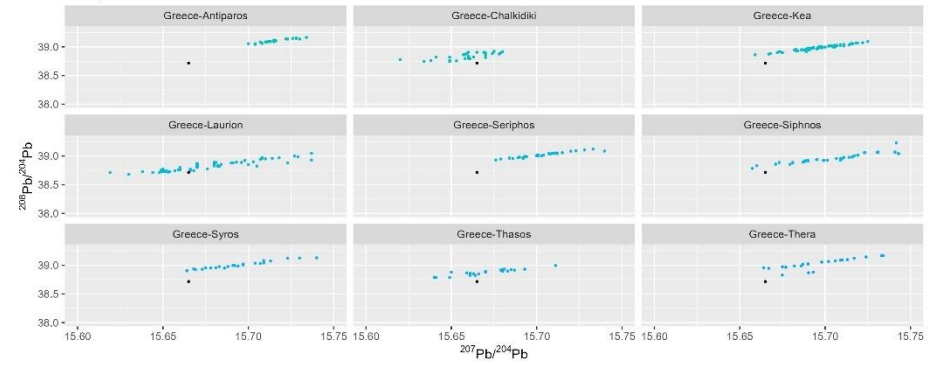

Sample MS041

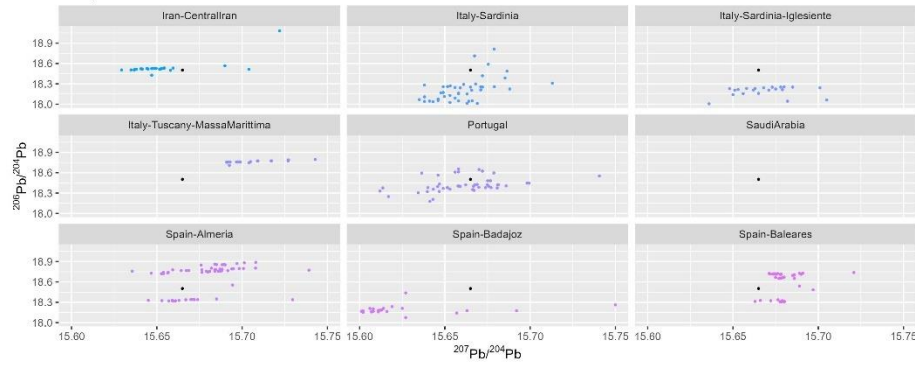

Sample MS041

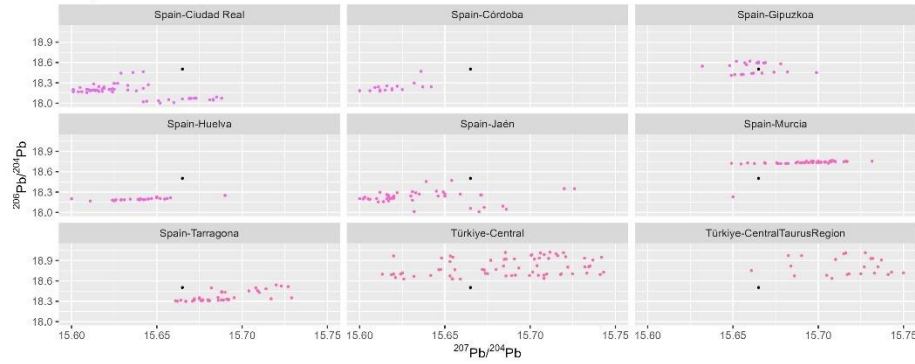

Sample MS041

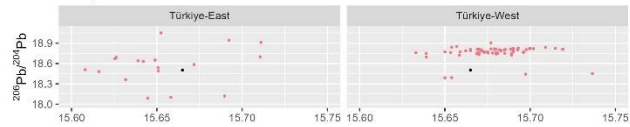

$^{207}\text{Pb}/^{204}\text{Pb}$

Sample MS041

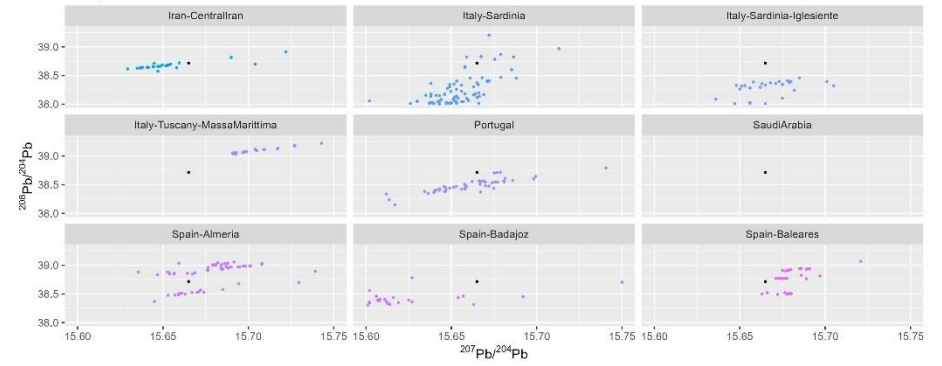

Sample MS041

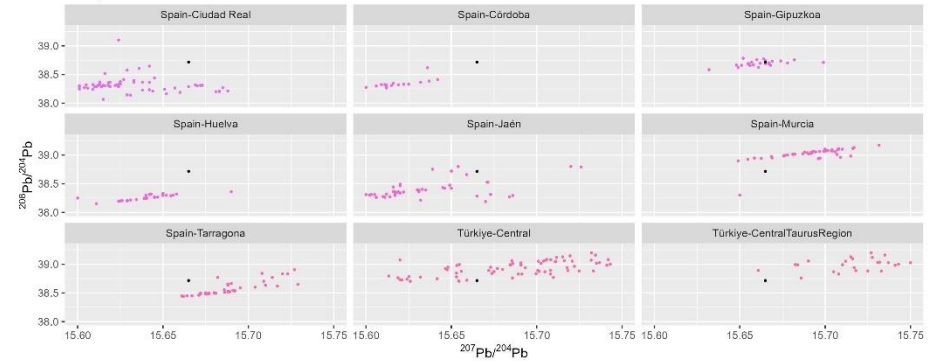

Sample MS041

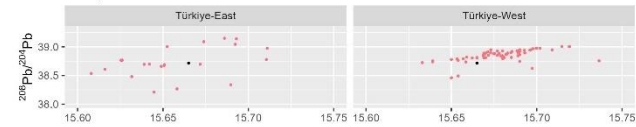

$^{207}\text{Pb}/^{204}\text{Pb}$



Sample MS042

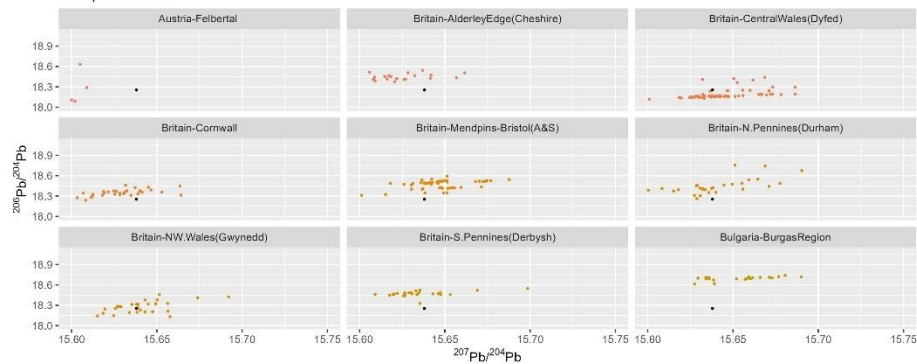

Sample MS042

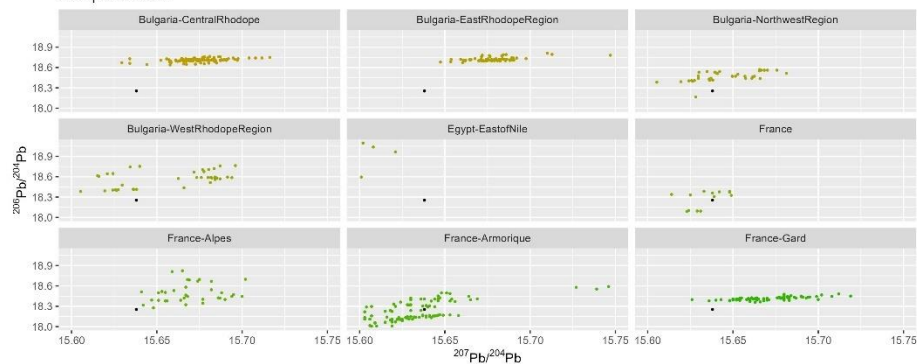

Sample MS042

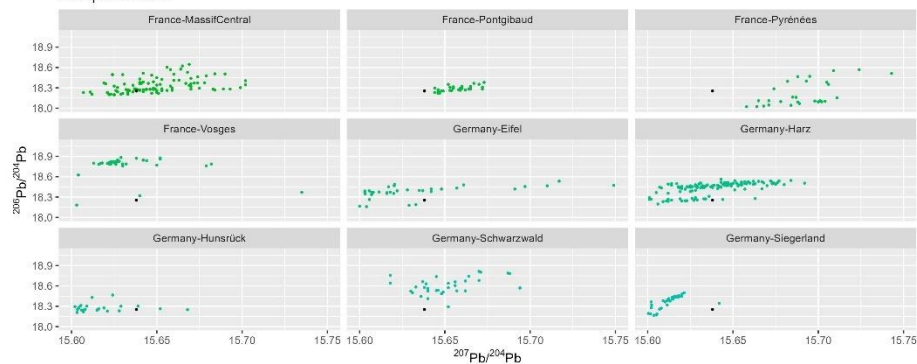

Sample MS042

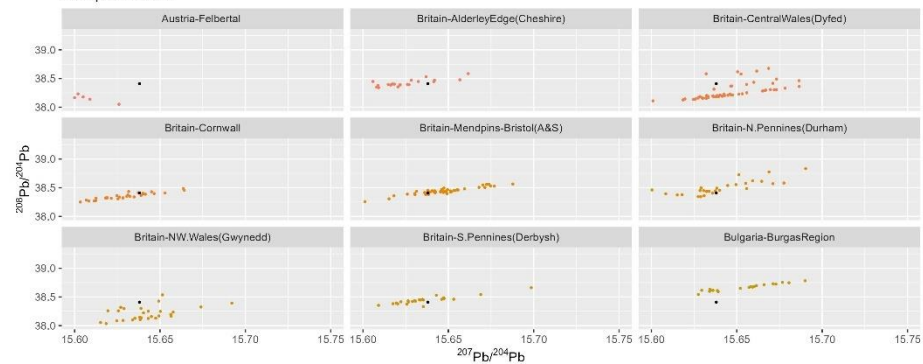

Sample MS042

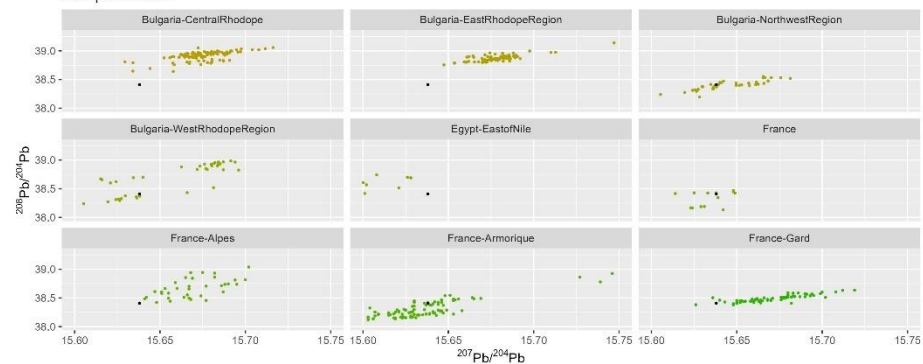

Sample MS042

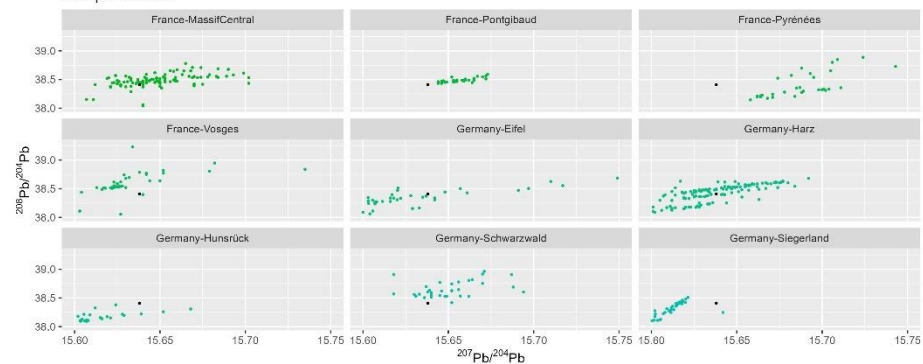

Sample MS042

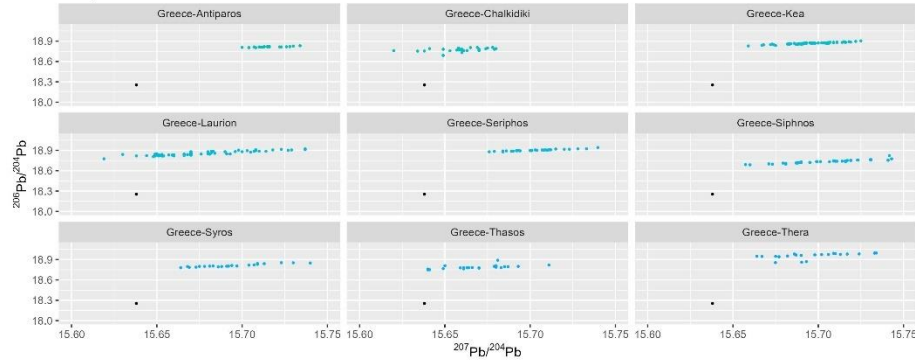

Sample MS042

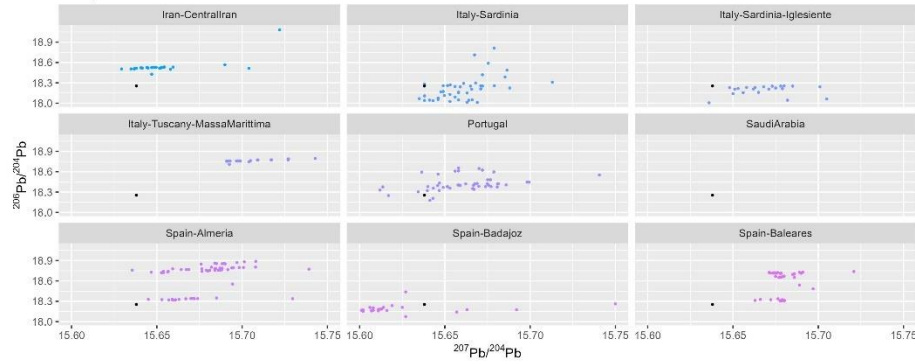

Sample MS042

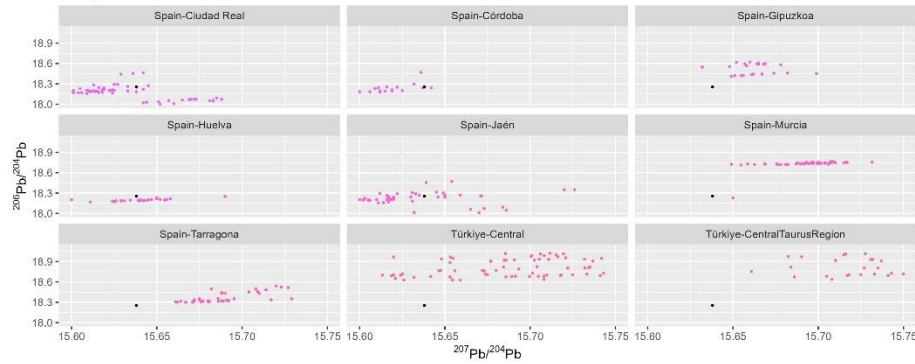

Sample MS042

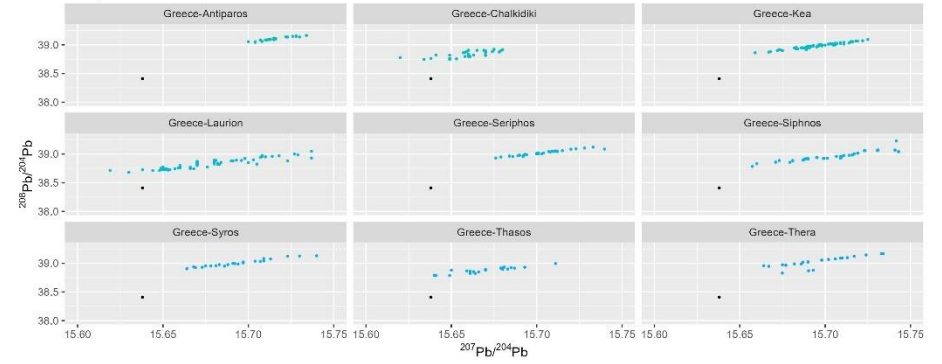

Sample MS042

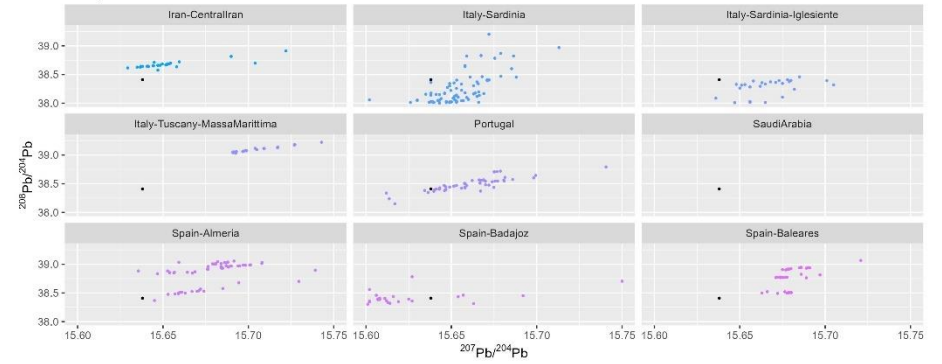

Sample MS042

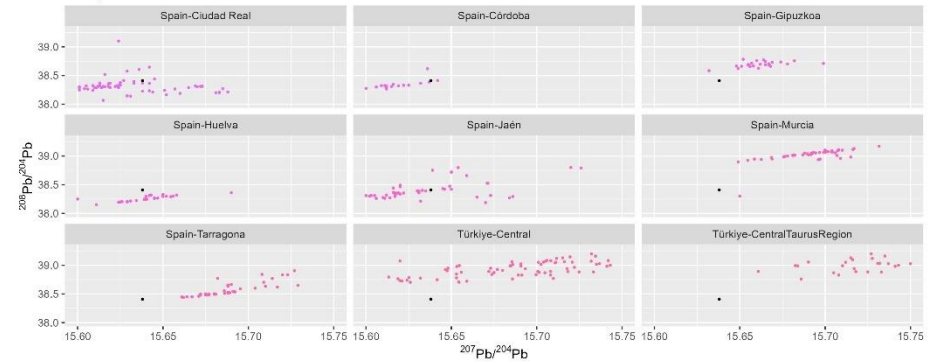

Sample MS042

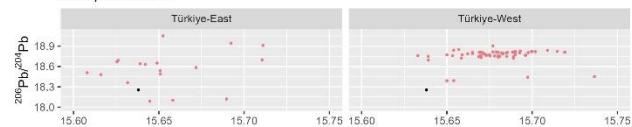 $^{207}\text{Pb}/^{204}\text{Pb}$ 

Sample MS043

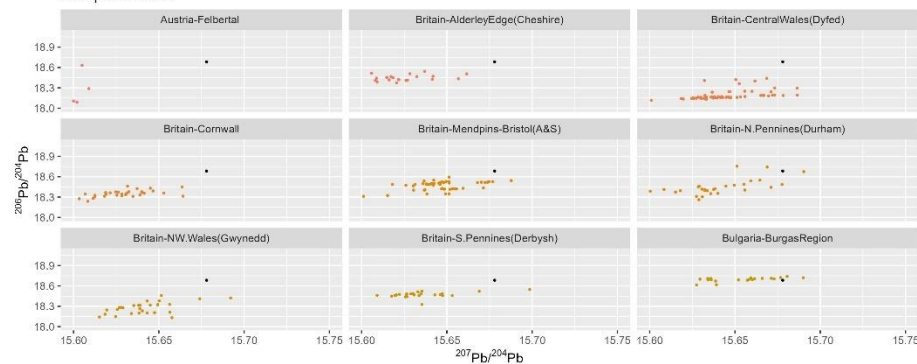 $^{207}\text{Pb}/^{204}\text{Pb}$ 

Sample MS043

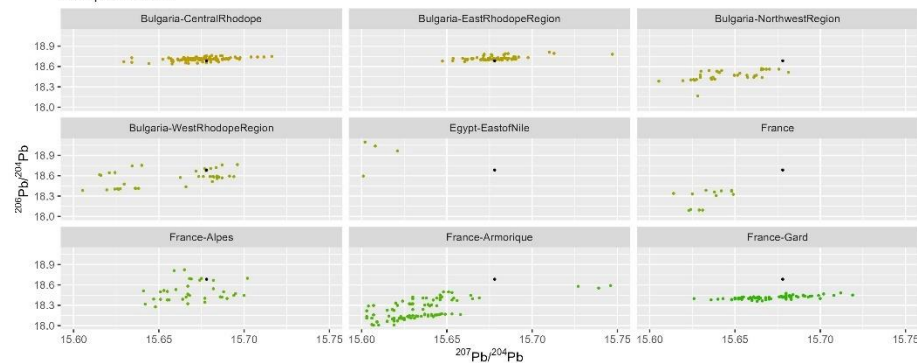 $^{207}\text{Pb}/^{204}\text{Pb}$ 

Sample MS042

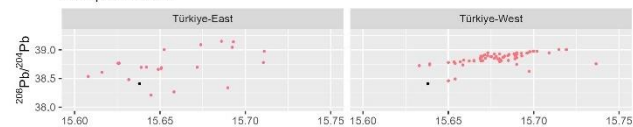 $^{207}\text{Pb}/^{204}\text{Pb}$ 

Sample MS043

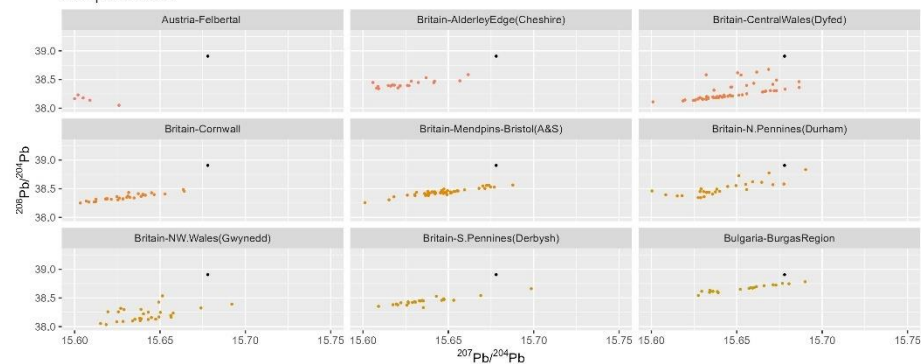 $^{207}\text{Pb}/^{204}\text{Pb}$ 

Sample MS043

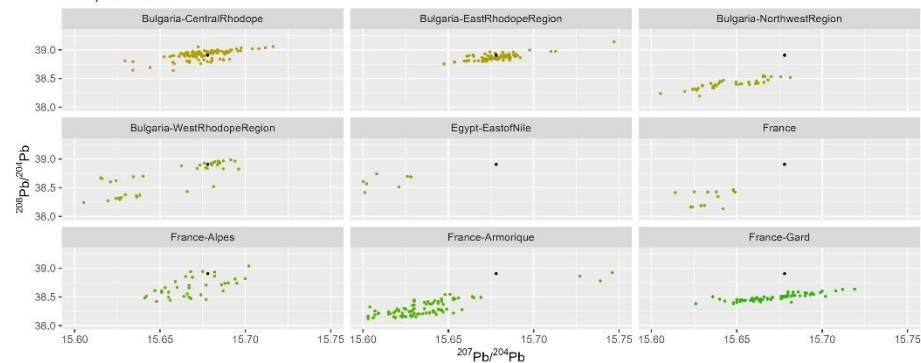 $^{207}\text{Pb}/^{204}\text{Pb}$

Sample MS043

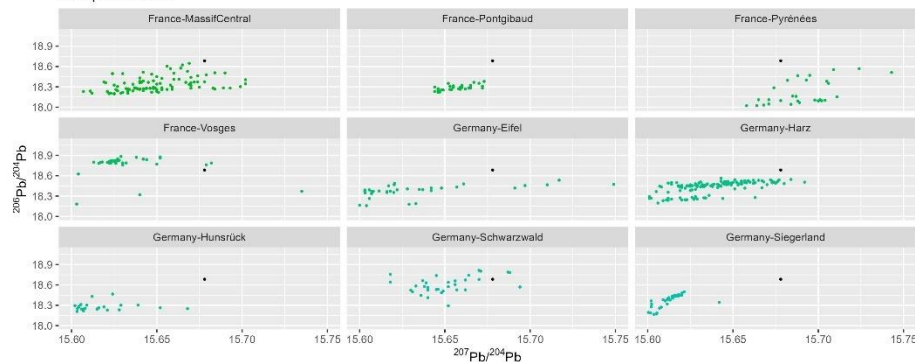

Sample MS043

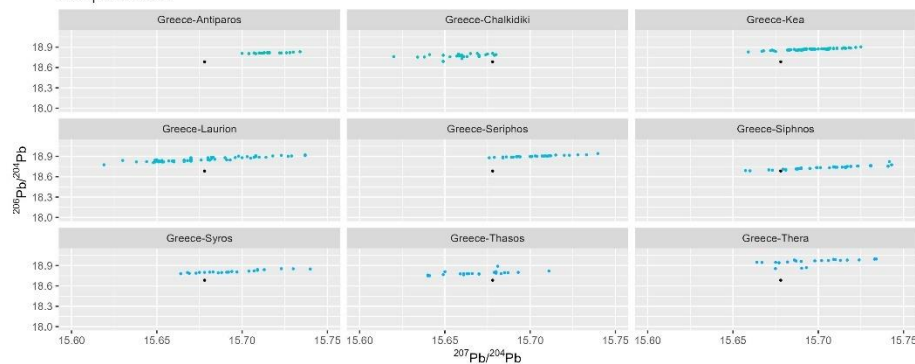

Sample MS043

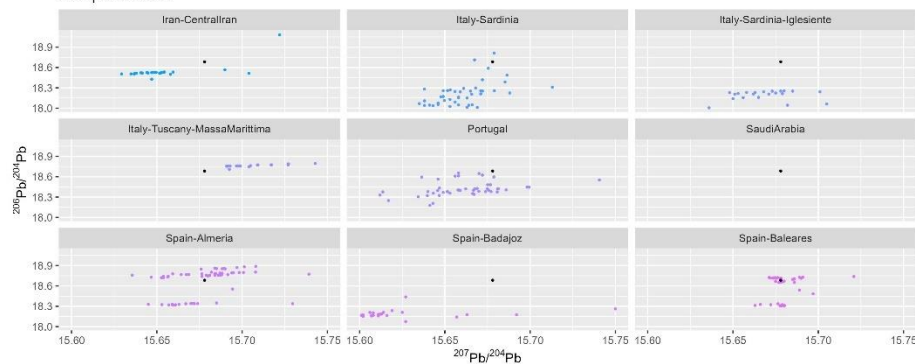

Sample MS043

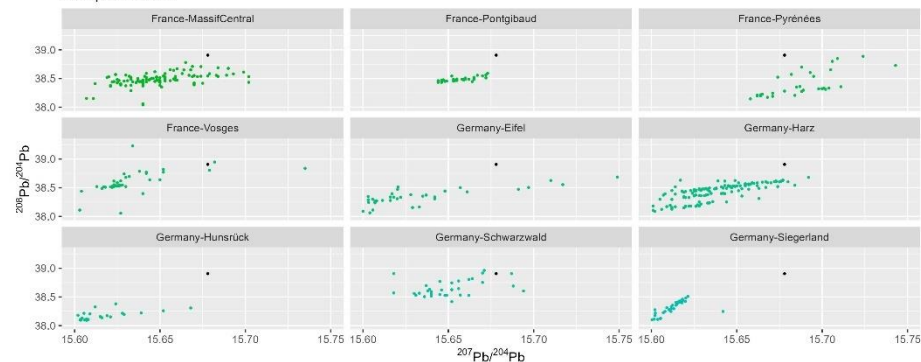

Sample MS043

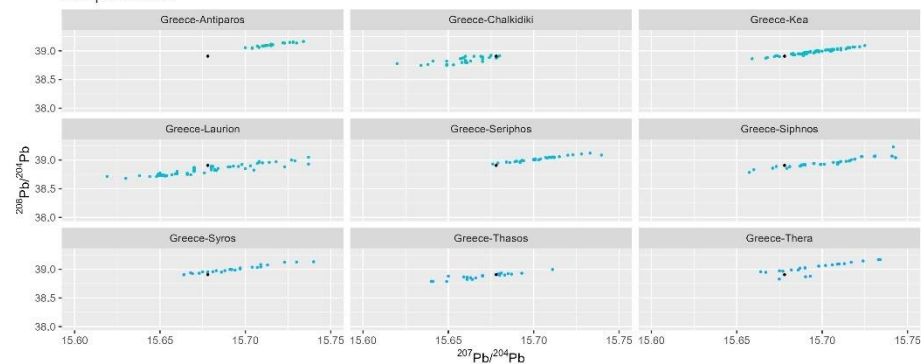

Sample MS043

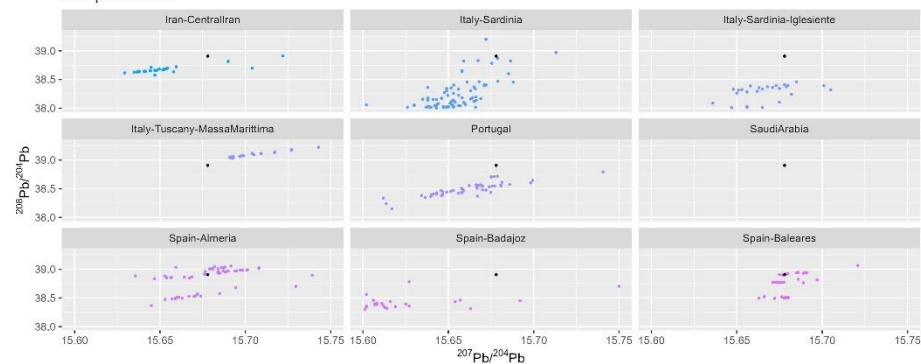



Sample MS043

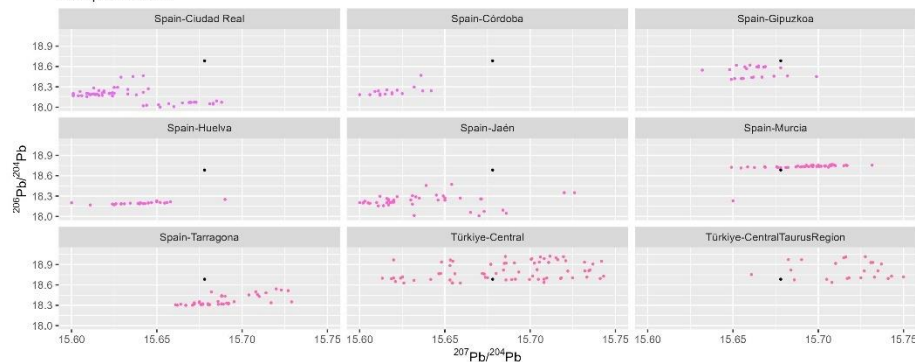

Sample MS043

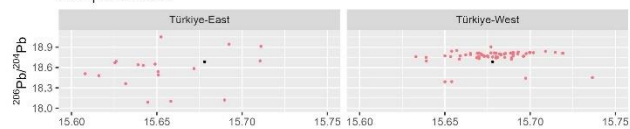

207Pb/204Pb

Sample MS044

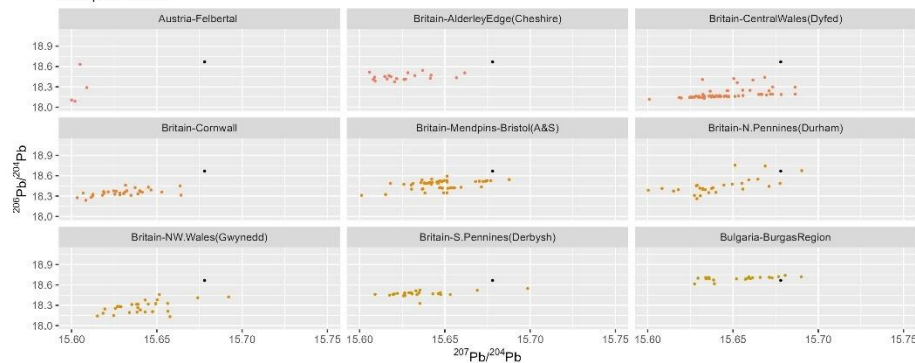

Sample MS043

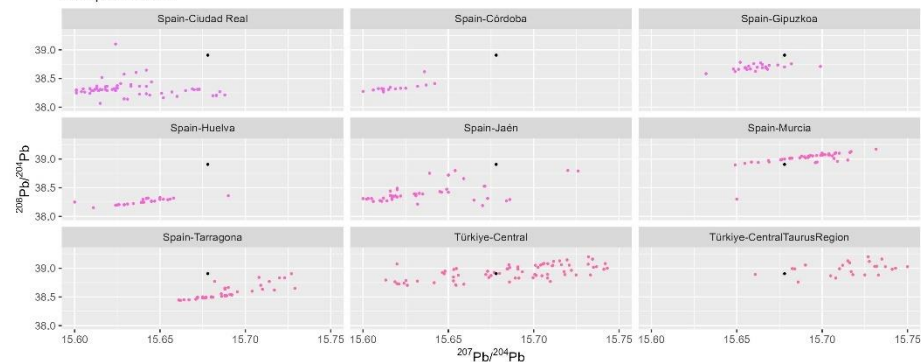

Sample MS043

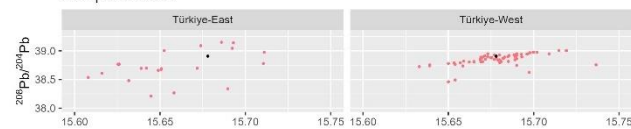

207Pb/204Pb

Sample MS044

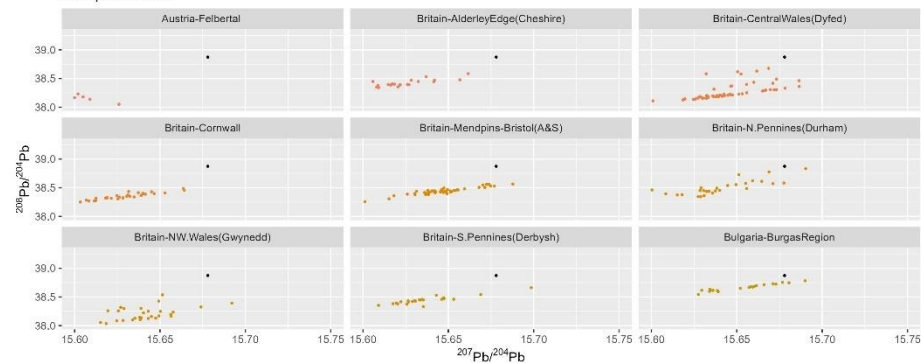



Sample MS044

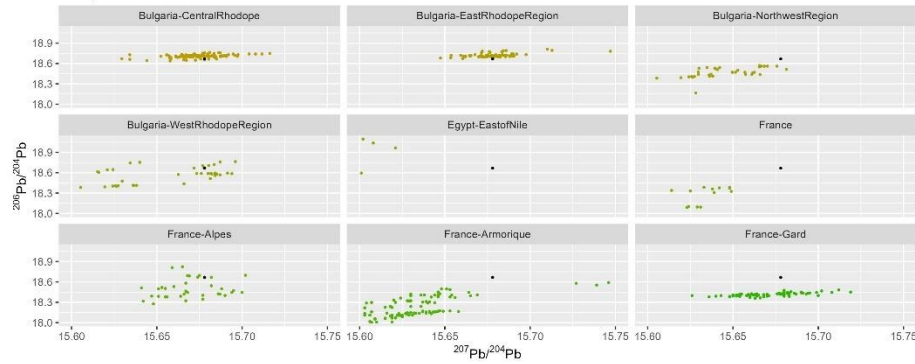

Sample MS044

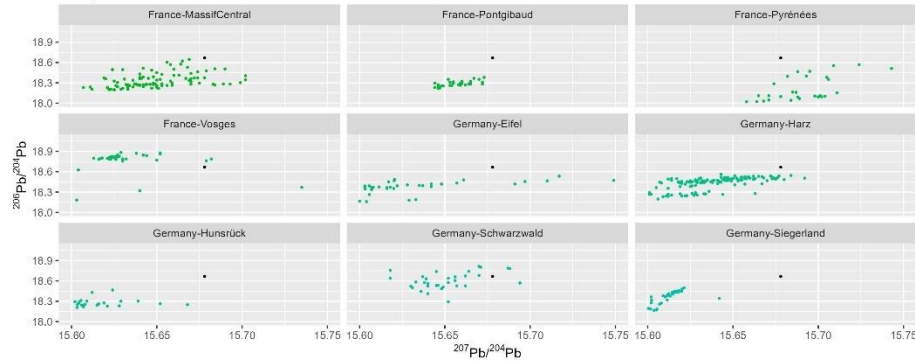

Sample MS044

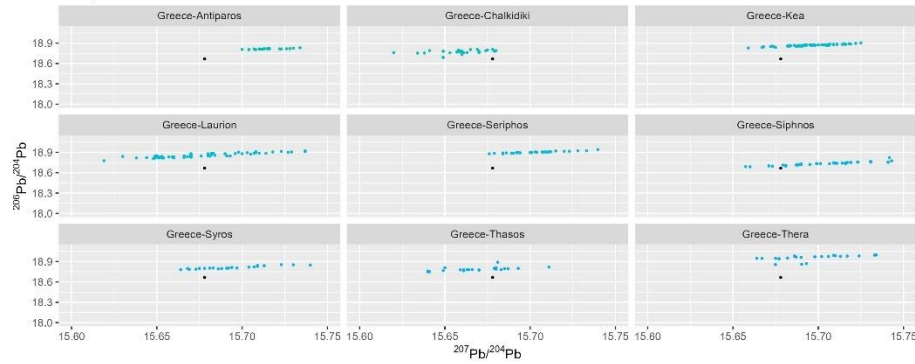

Sample MS044

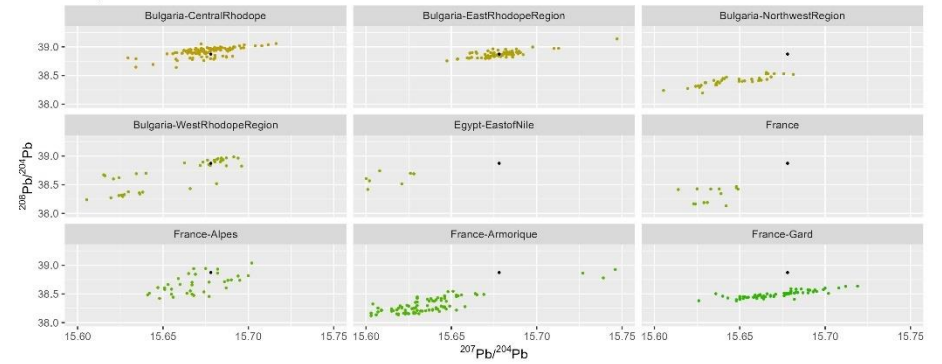

Sample MS044

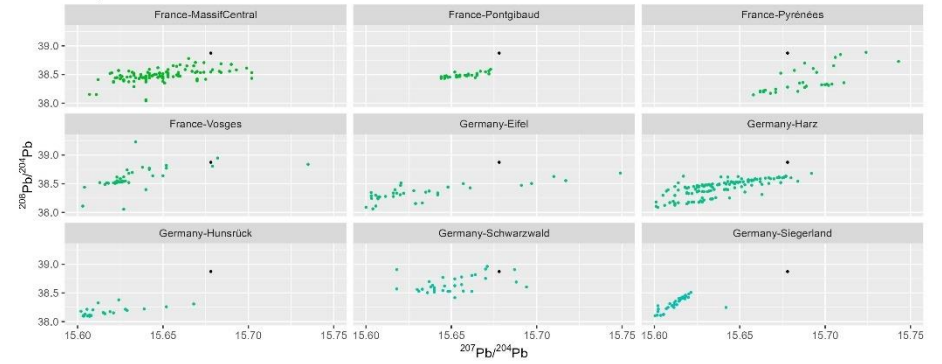

Sample MS044

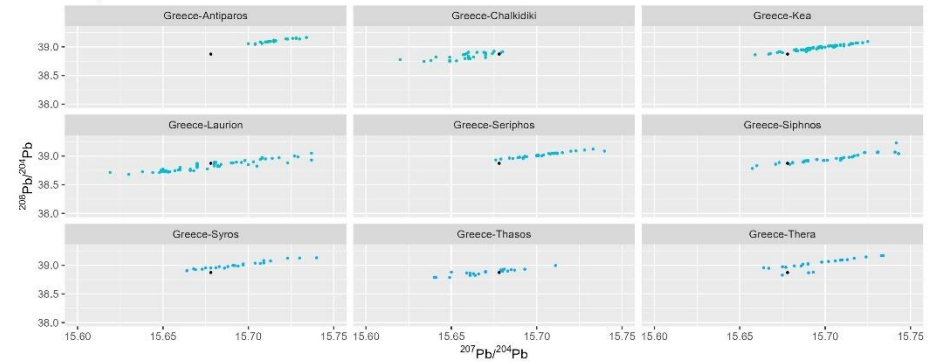

Sample MS044

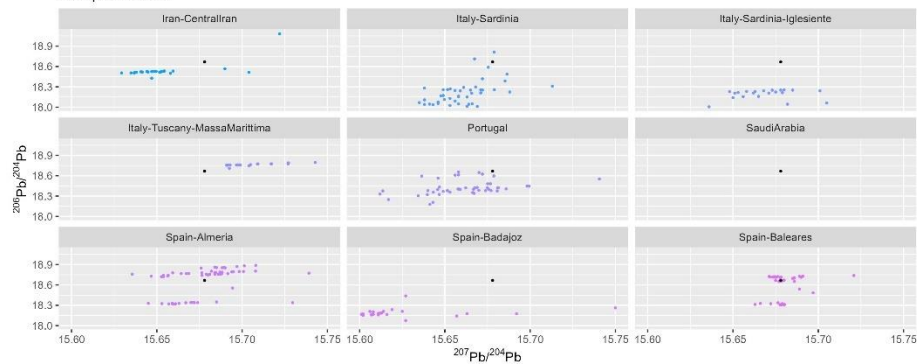

Sample MS044

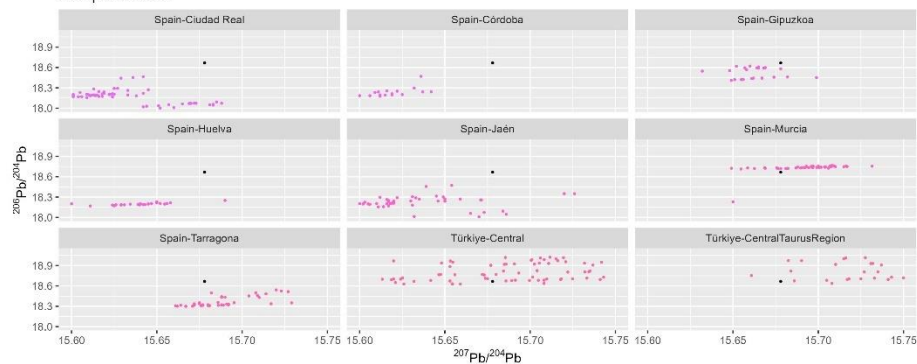

Sample MS044

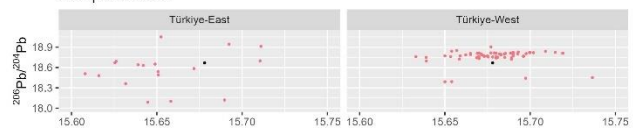

$^{207}\text{Pb}/^{204}\text{Pb}$

Sample MS044

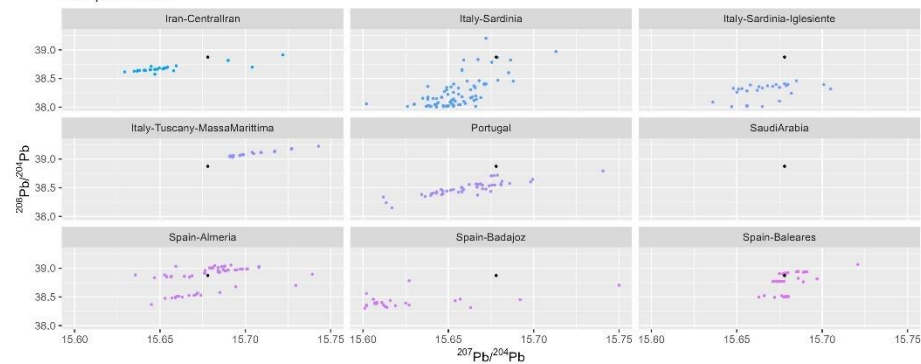

Sample MS044

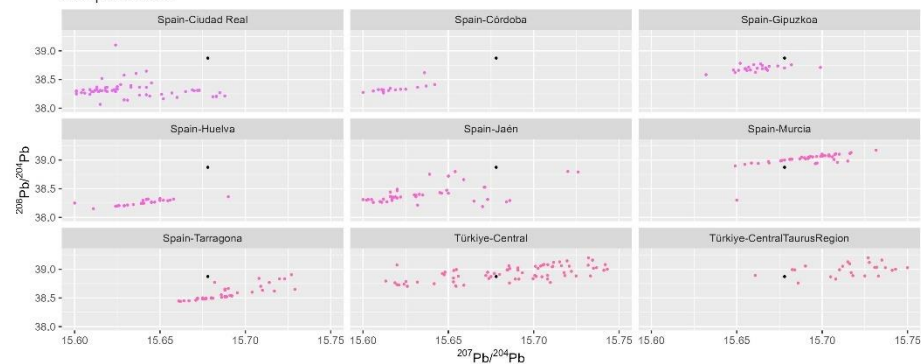

Sample MS044

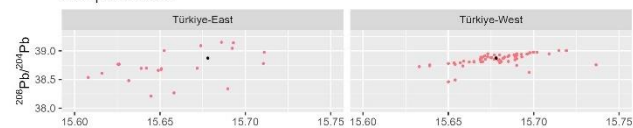

$^{207}\text{Pb}/^{204}\text{Pb}$

Sample MS045

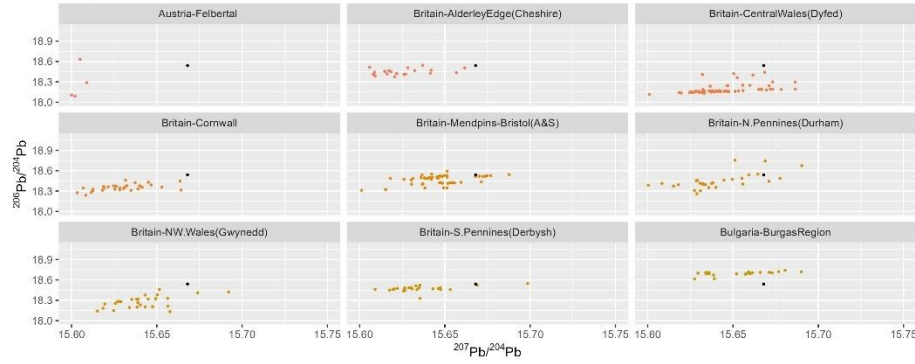

Sample MS045

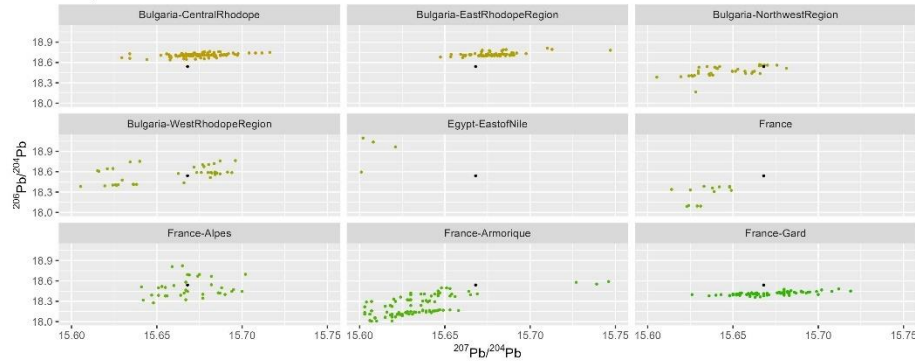

Sample MS045

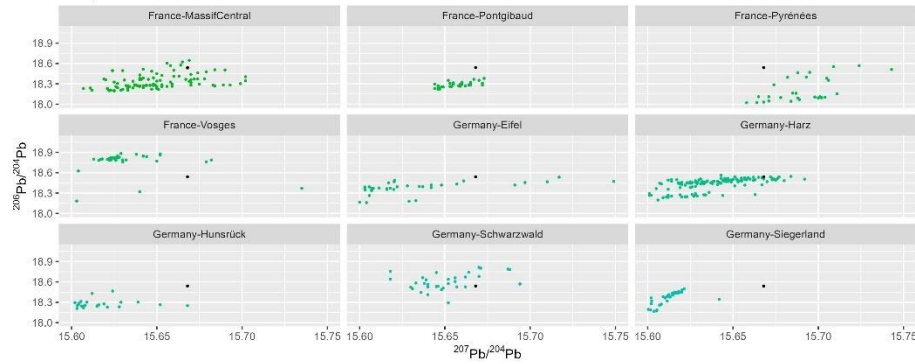

Sample MS045

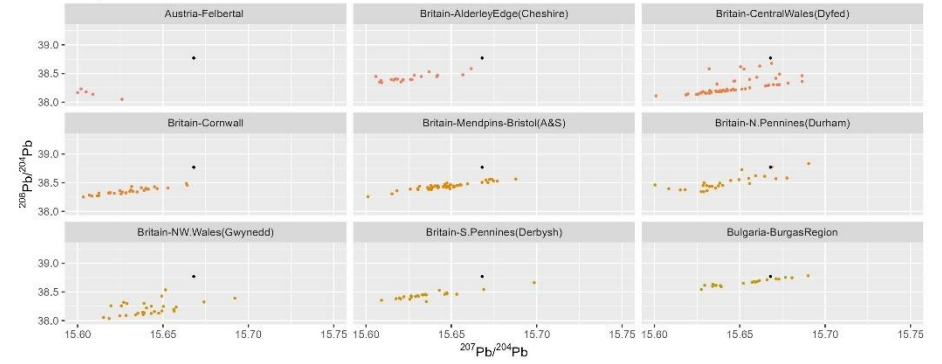

Sample MS045

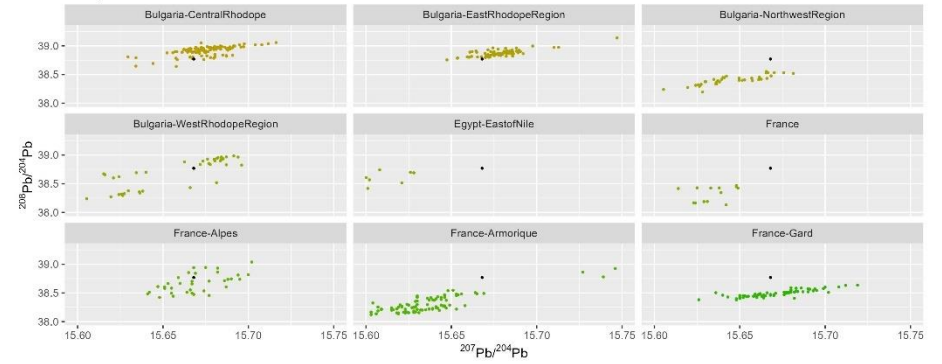

Sample MS045

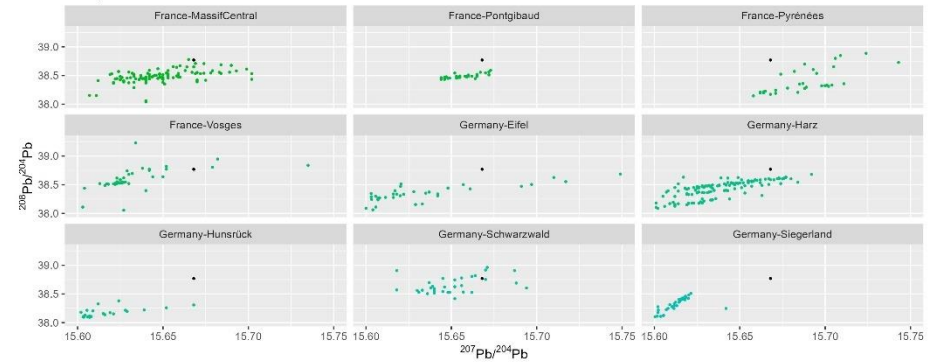

Sample MS045

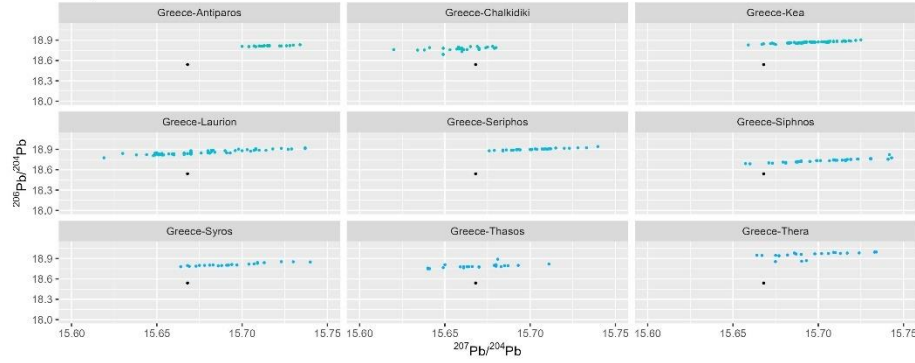

Sample MS045

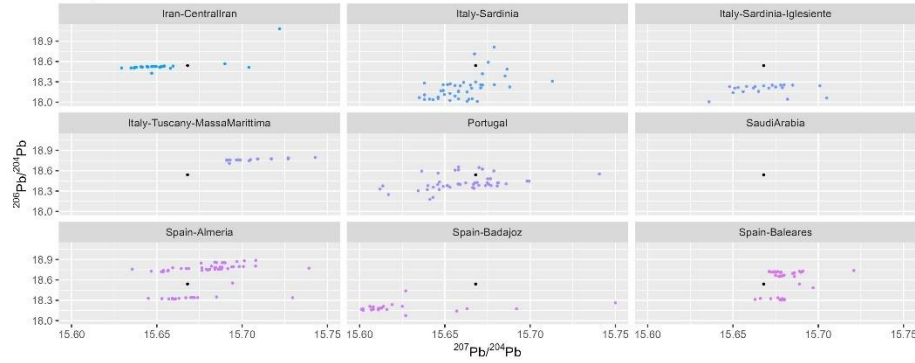

Sample MS045

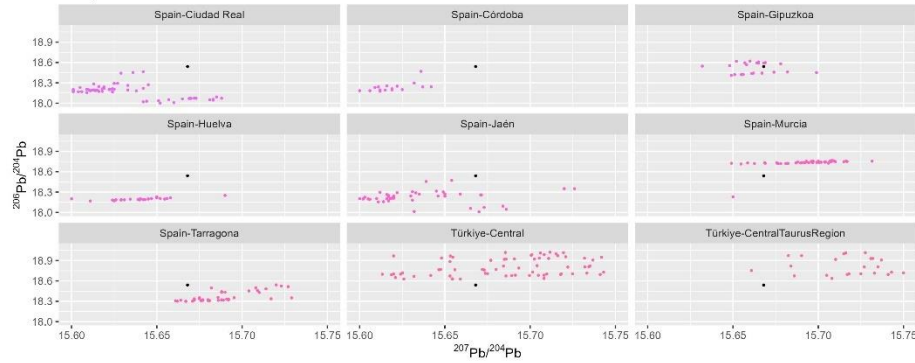

Sample MS045

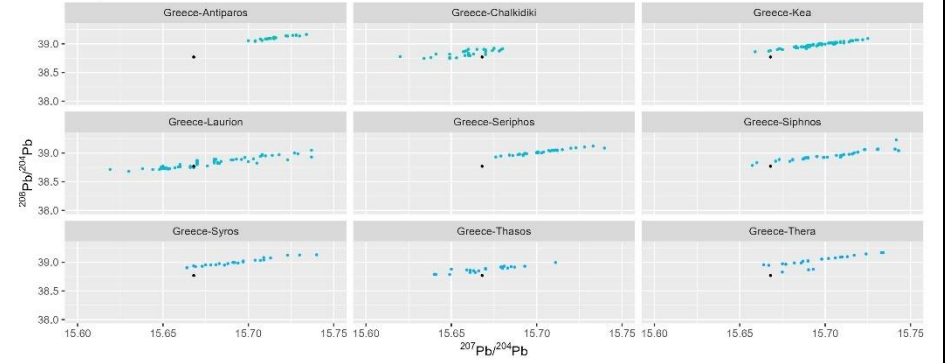

Sample MS045

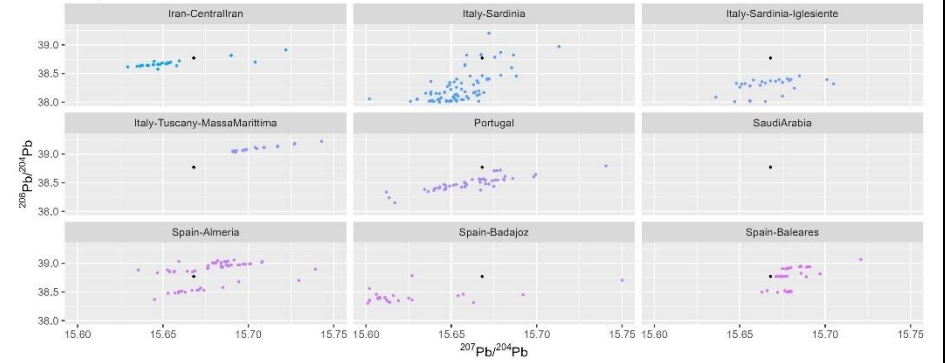

Sample MS045

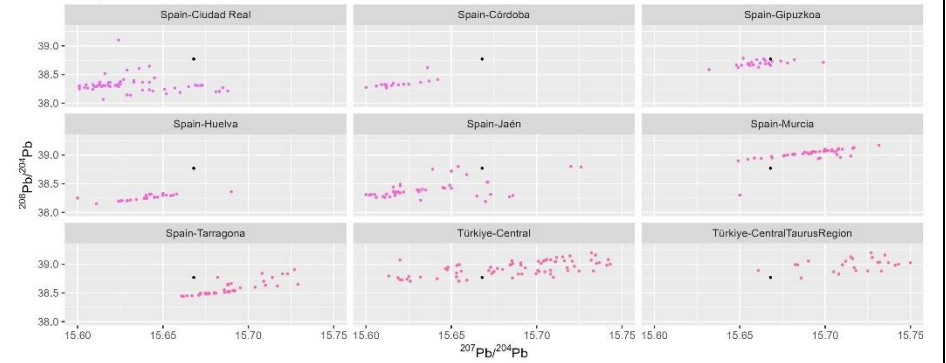



Sample MS045

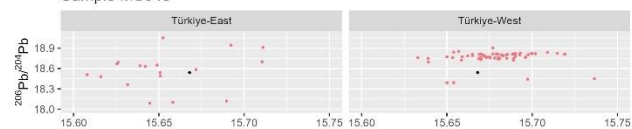

Sample MS045

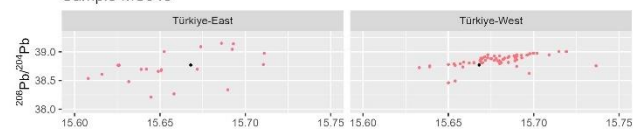

Sample MS046

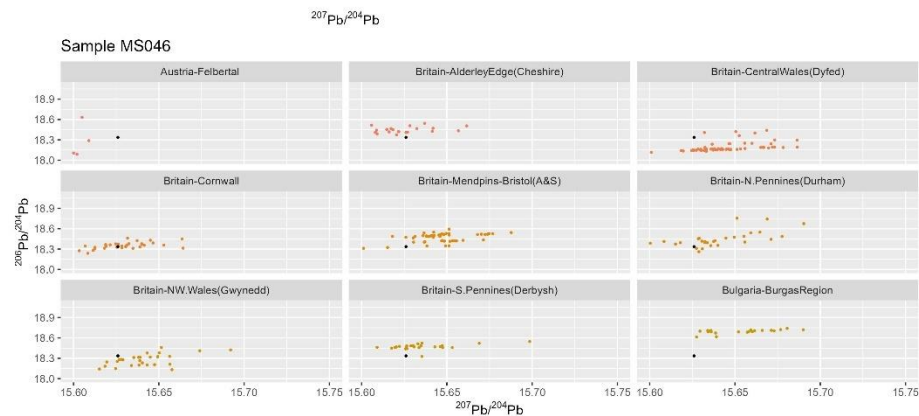

Sample MS046

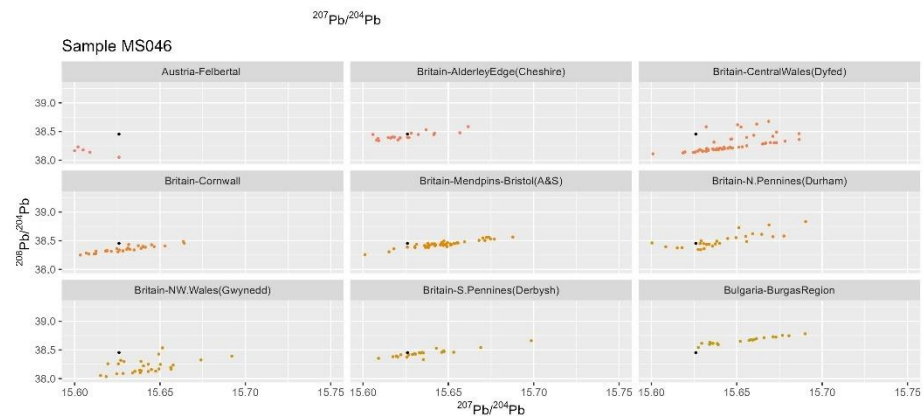

Sample MS046

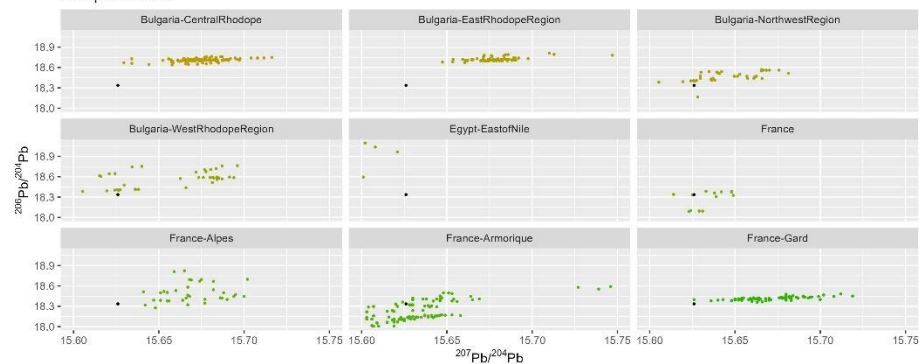

Sample MS046

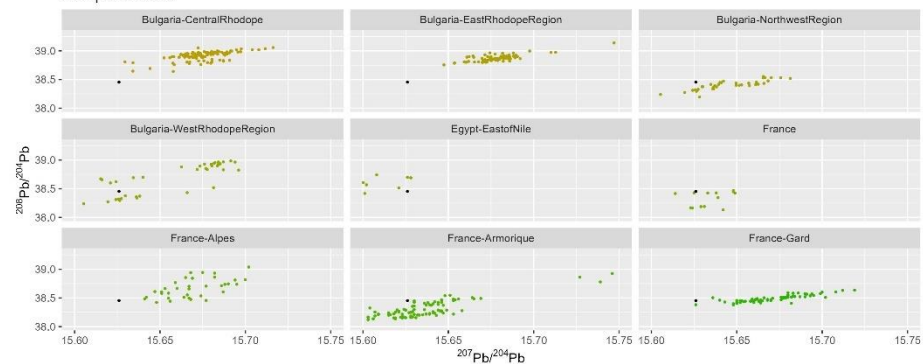



Sample MS046

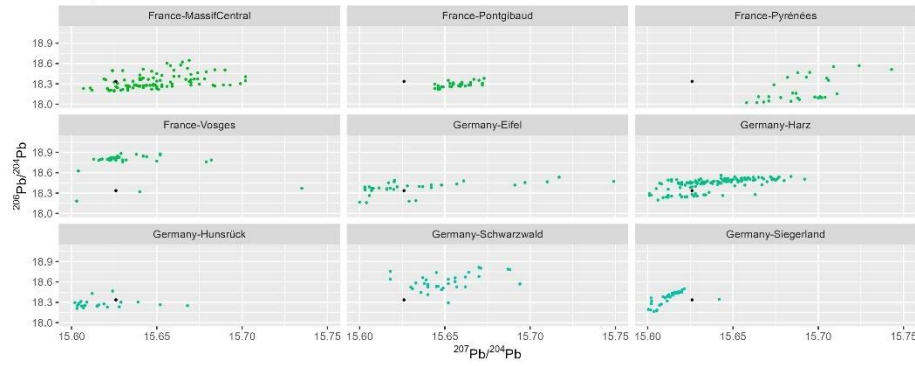

Sample MS046

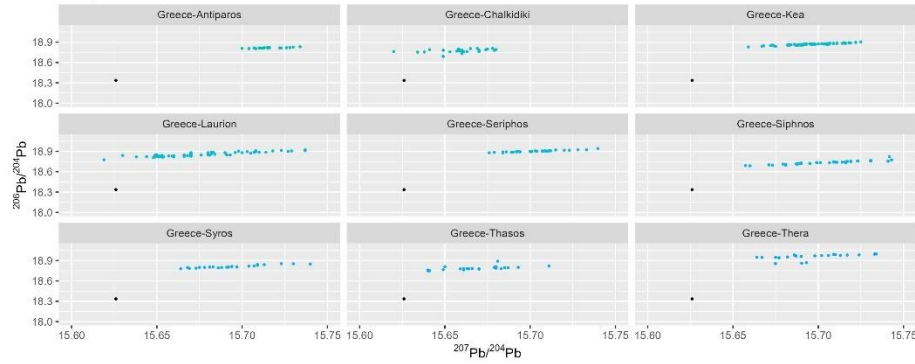

Sample MS046

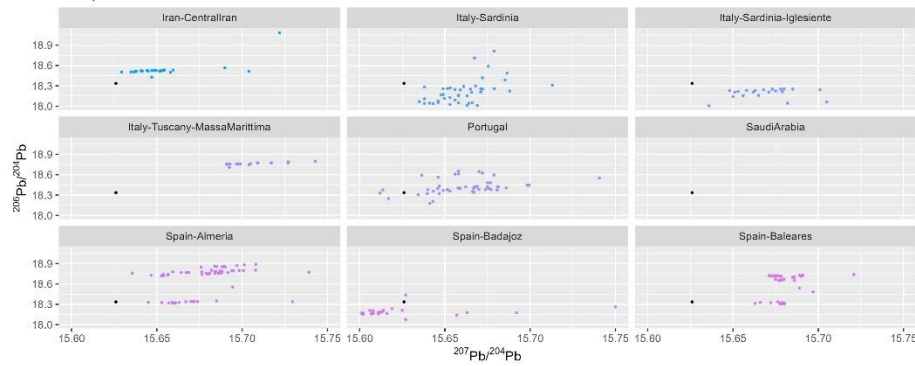

Sample MS046

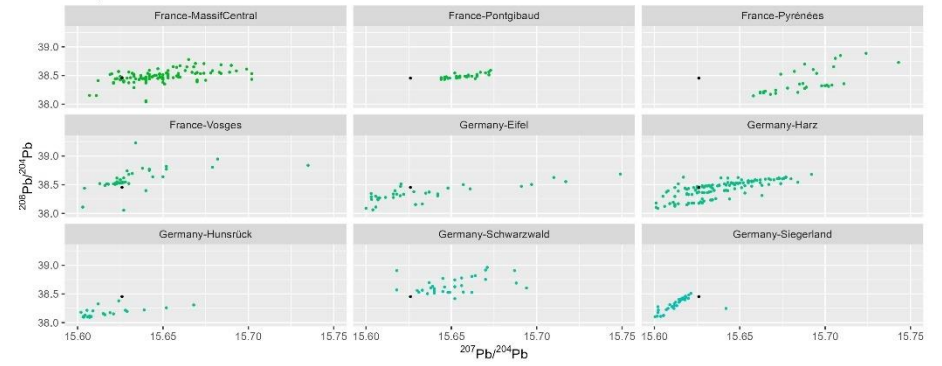

Sample MS046

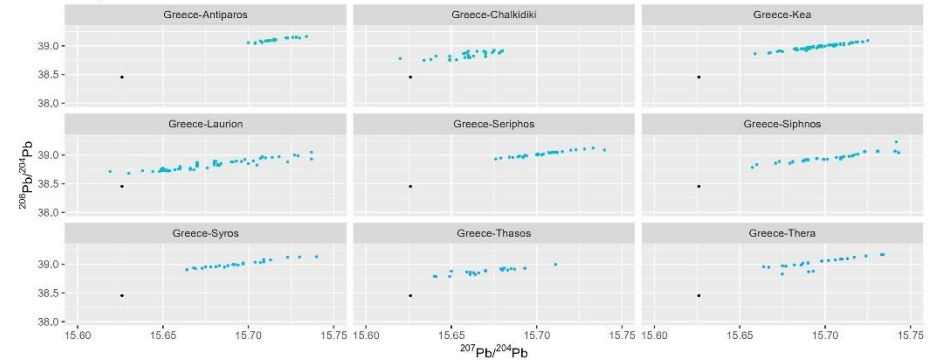

Sample MS046

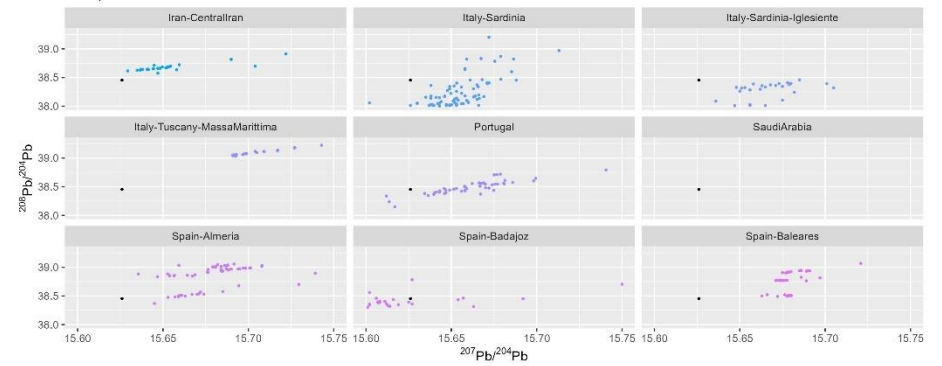

Sample MS046

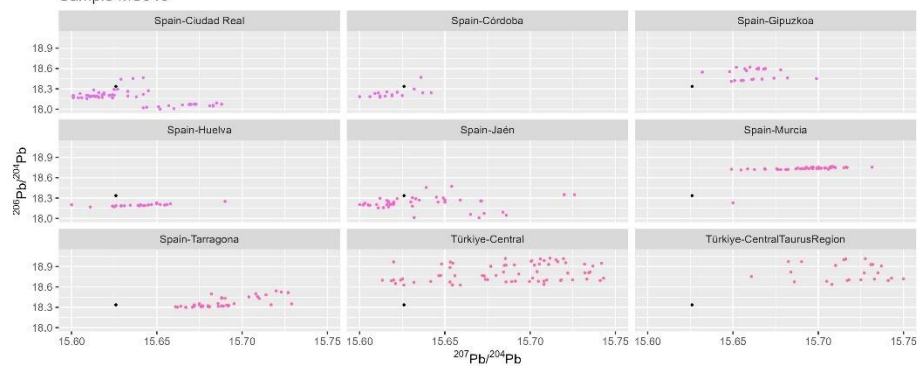

Sample MS046

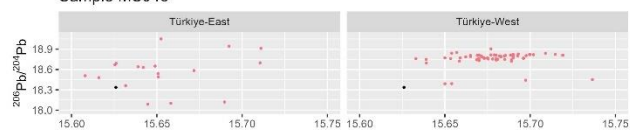 $^{207}\text{Pb}/^{204}\text{Pb}$ 

Sample MS047

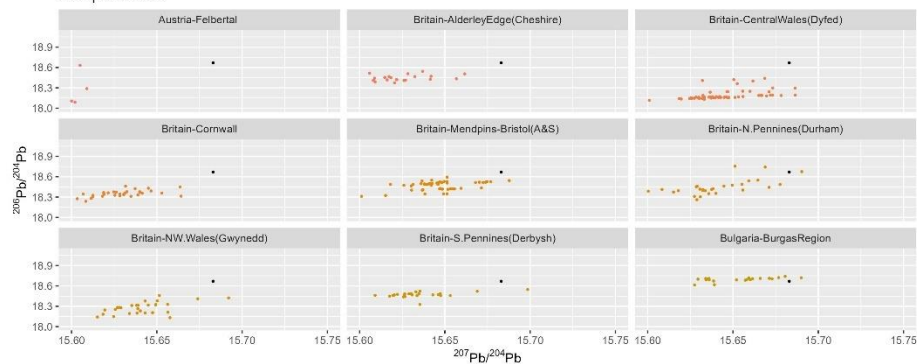

Sample MS046

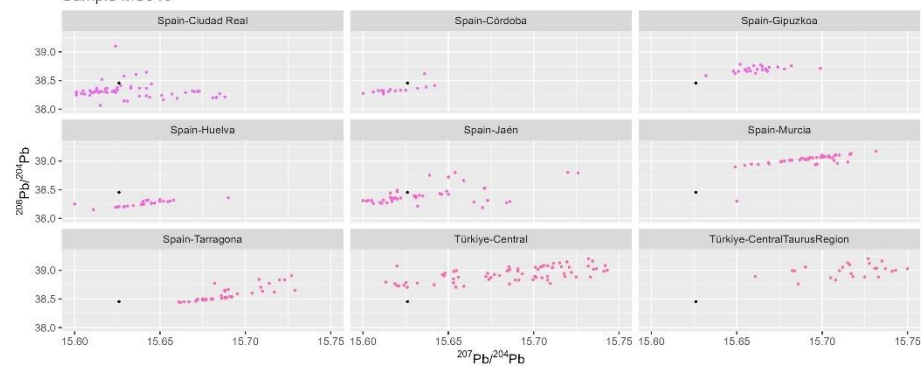

Sample MS046

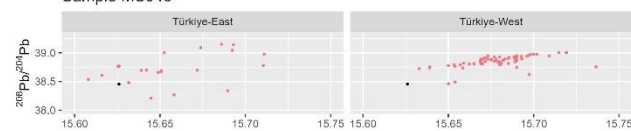 $^{207}\text{Pb}/^{204}\text{Pb}$ 

Sample MS047

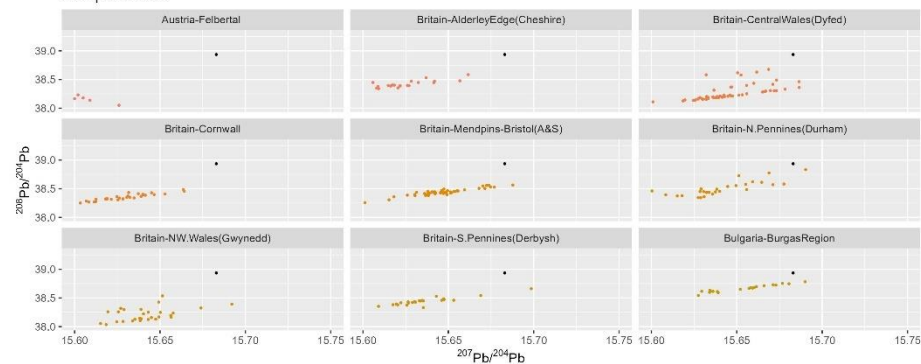

Sample MS047

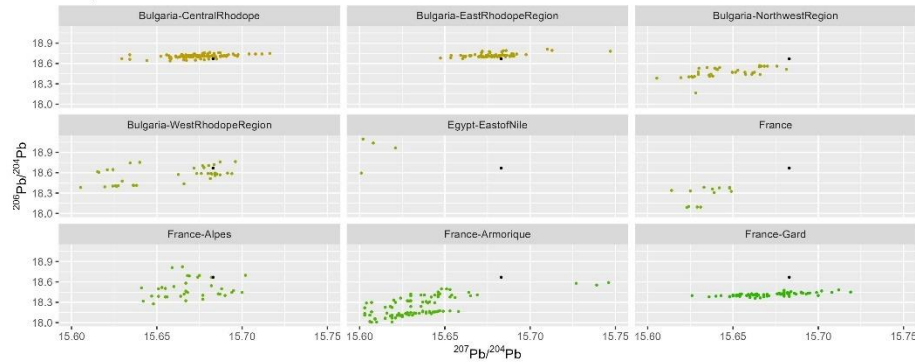

Sample MS047

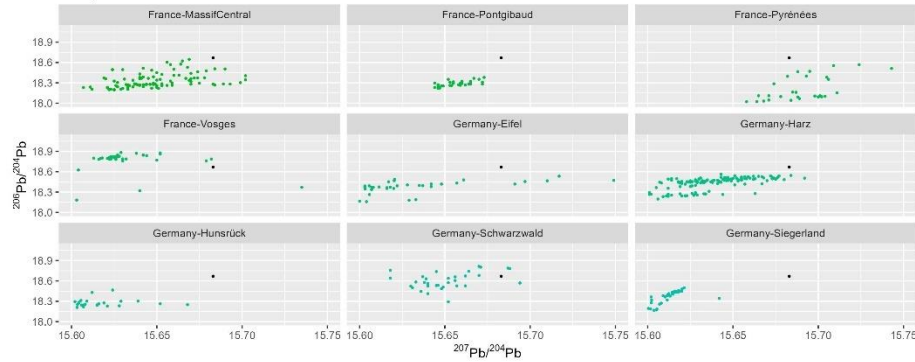

Sample MS047

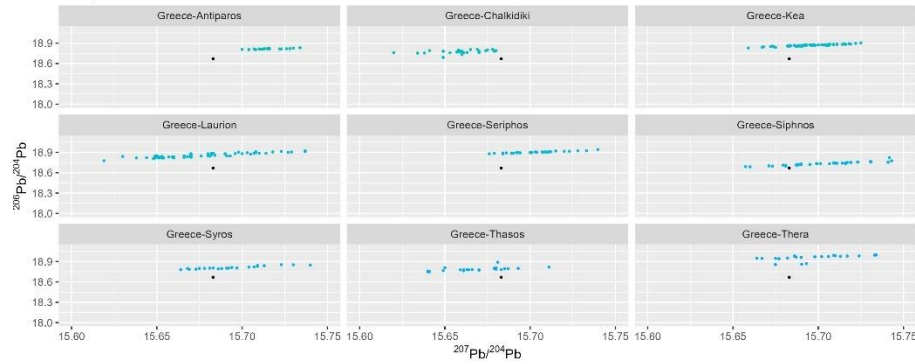

Sample MS047

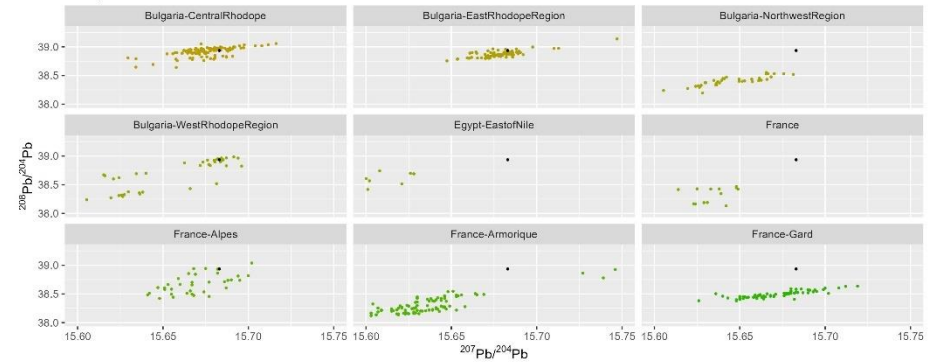

Sample MS047

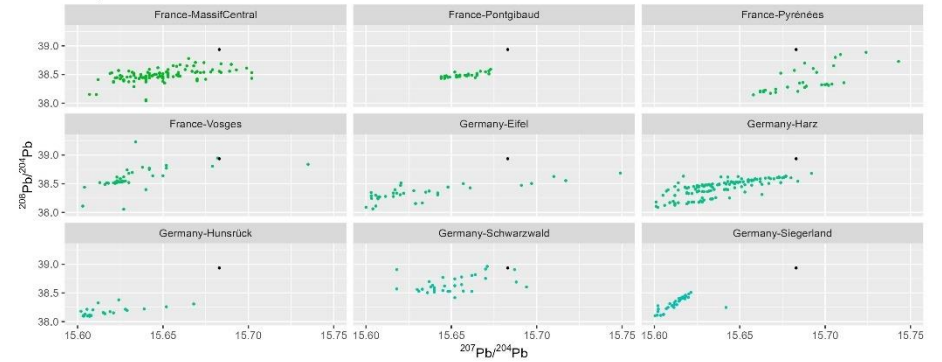

Sample MS047

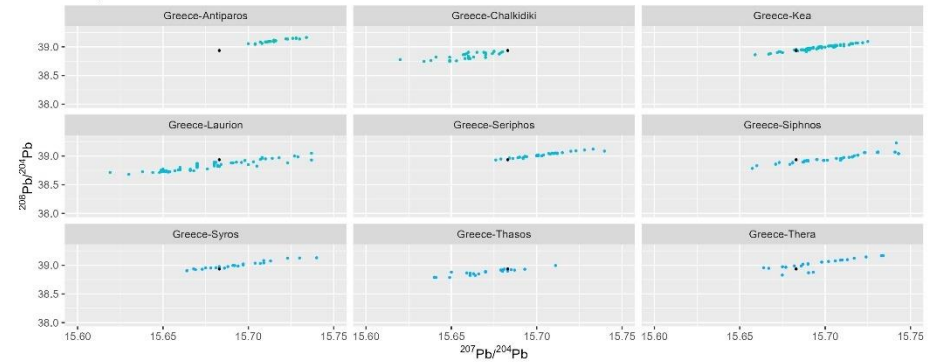

Sample MS047

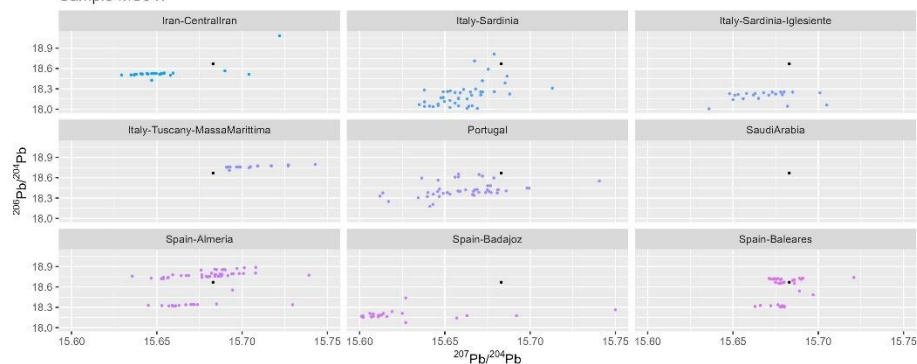

Sample MS047

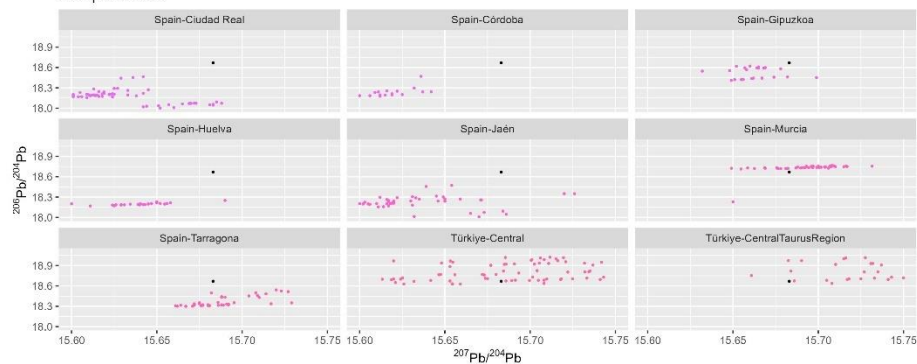

Sample MS047

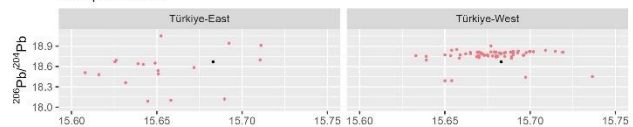 $^{207}\text{Pb}/^{204}\text{Pb}$ 

Sample MS047

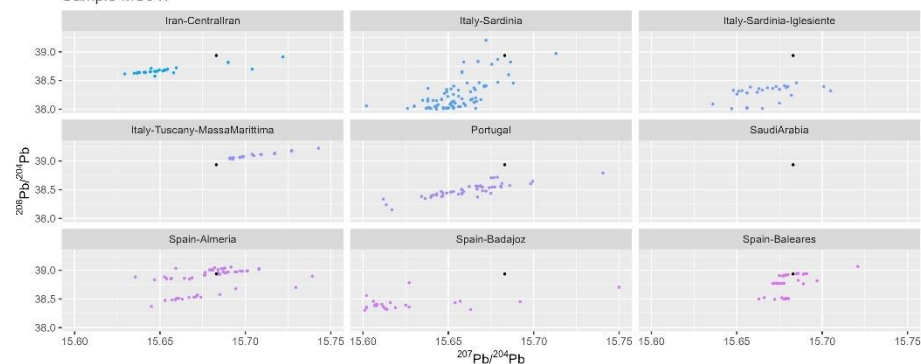

Sample MS047

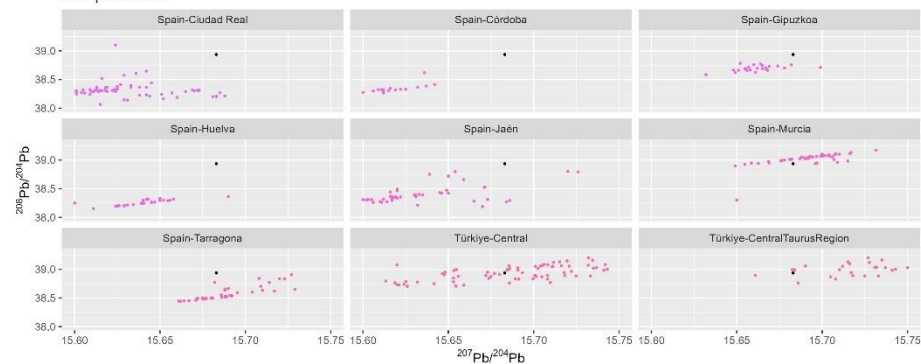

Sample MS047

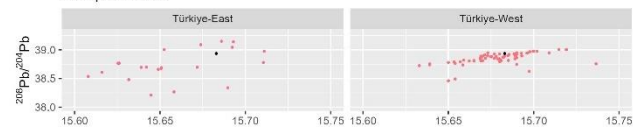 $^{207}\text{Pb}/^{204}\text{Pb}$



Sample MS048

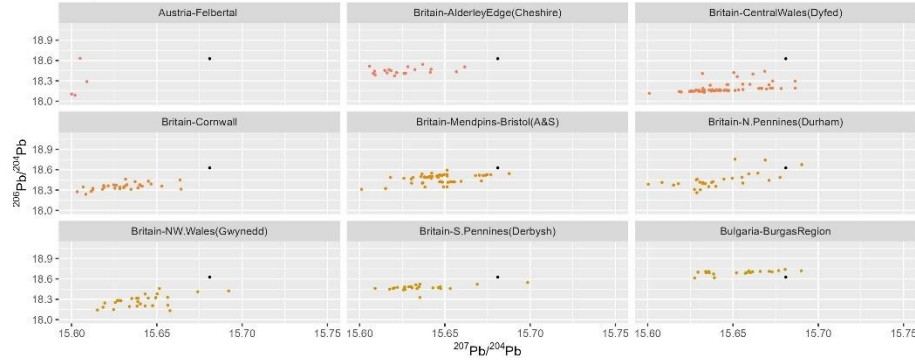

Sample MS048

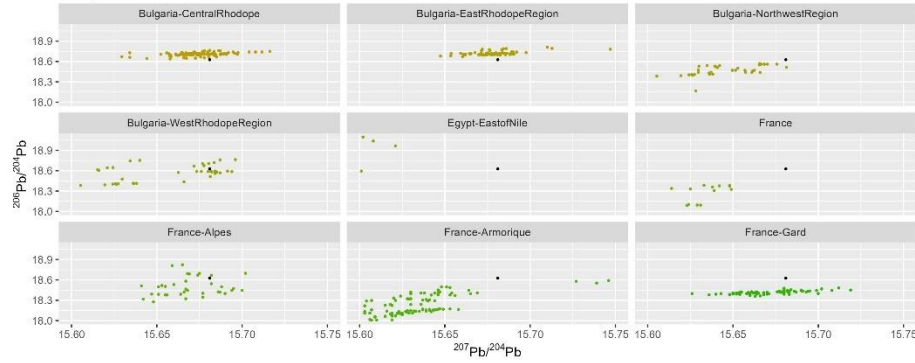

Sample MS048

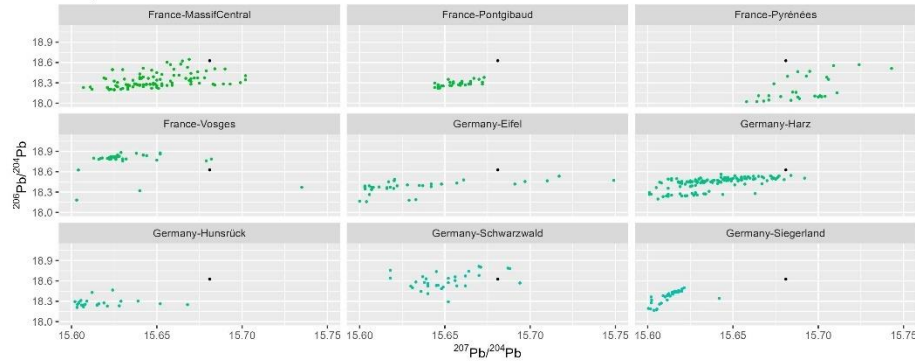

Sample MS048

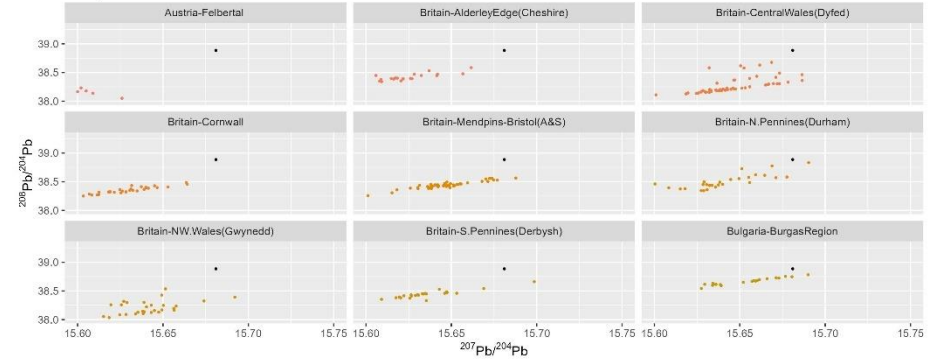

Sample MS048

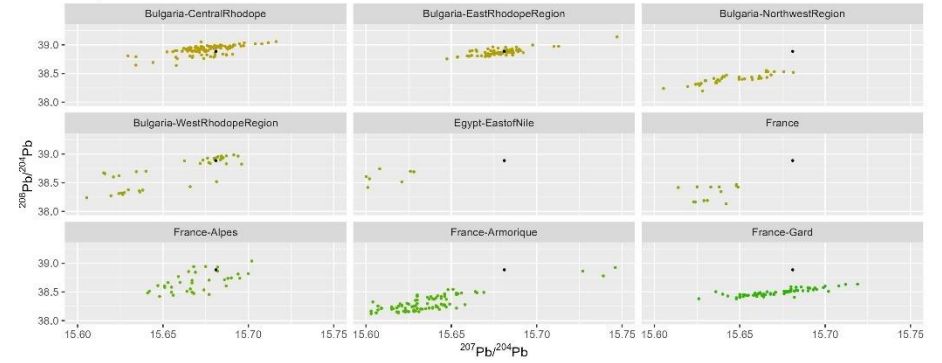

Sample MS048

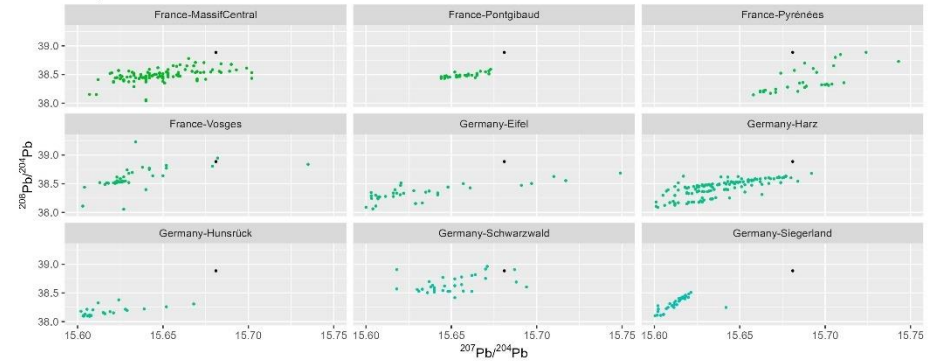



Sample MS048

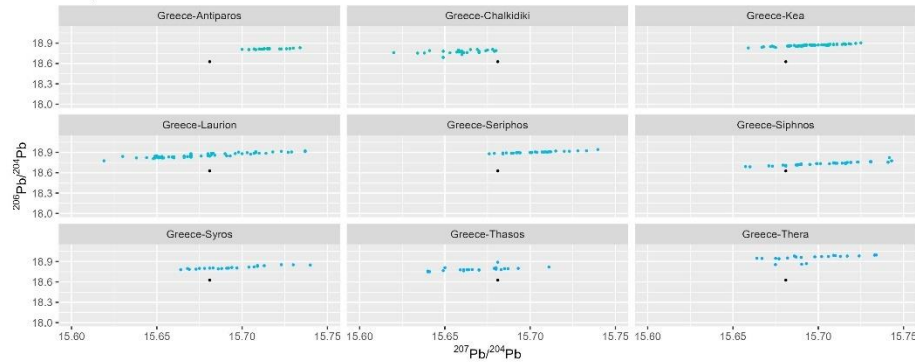

Sample MS048

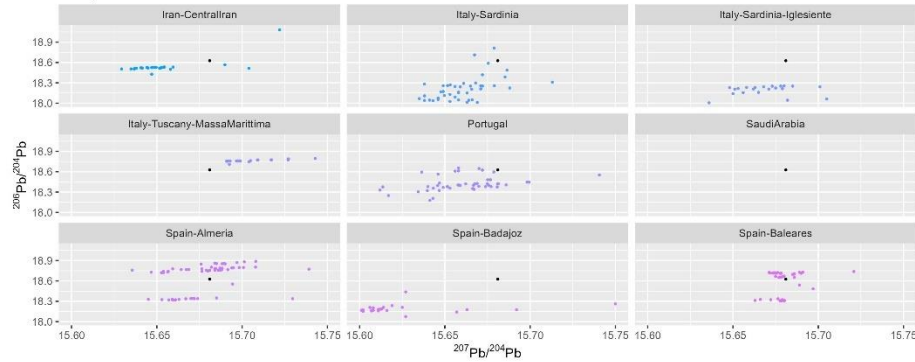

Sample MS048

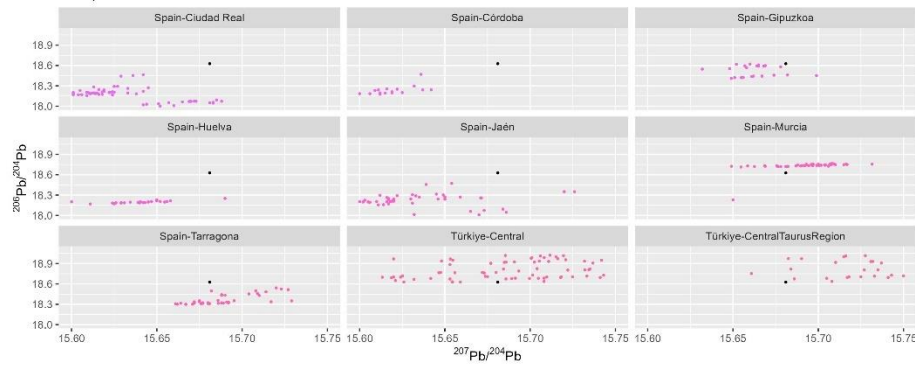

Sample MS048

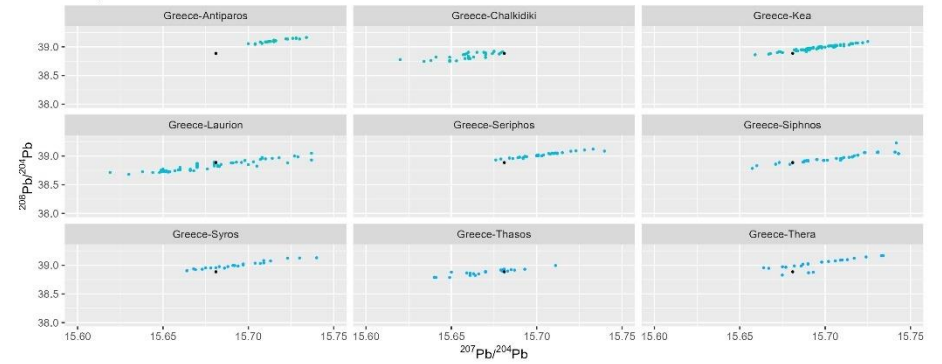

Sample MS048

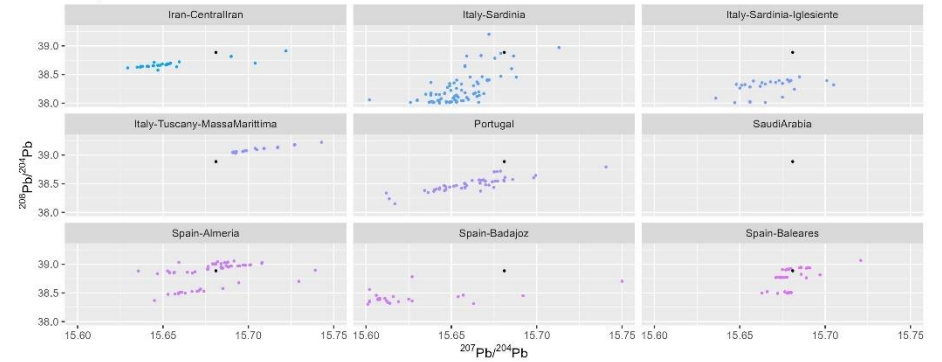

Sample MS048

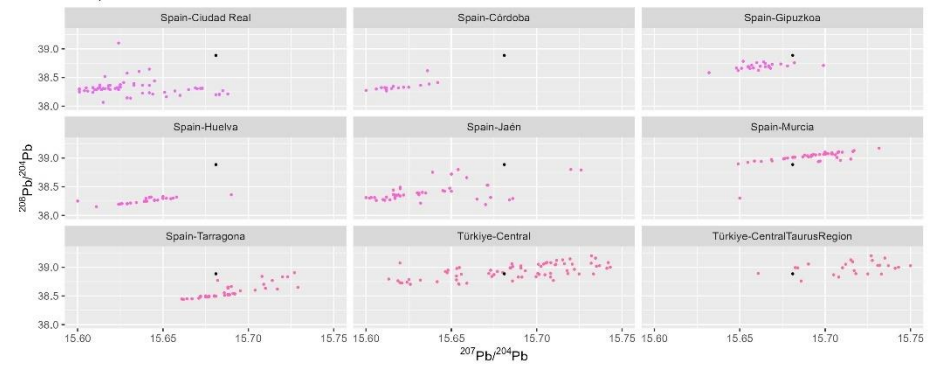

Sample MS048

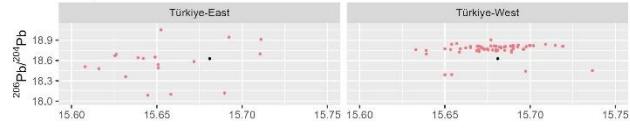

Sample MS048

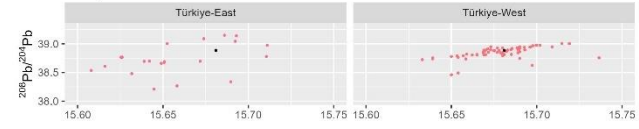 $^{207}\text{Pb}/^{204}\text{Pb}$ 

Sample MS049

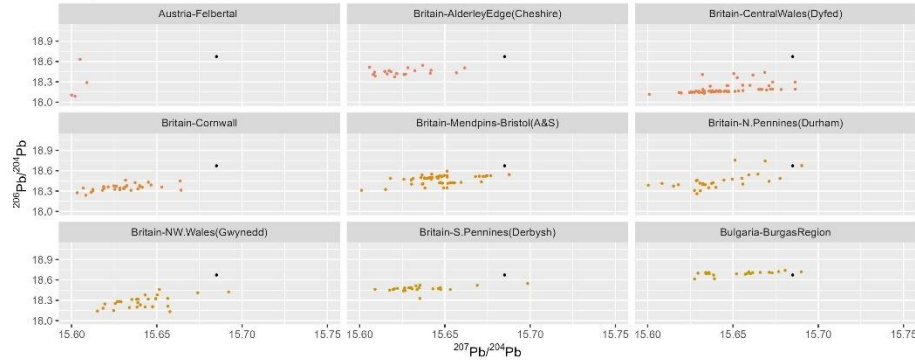 $^{207}\text{Pb}/^{204}\text{Pb}$ 

Sample MS049

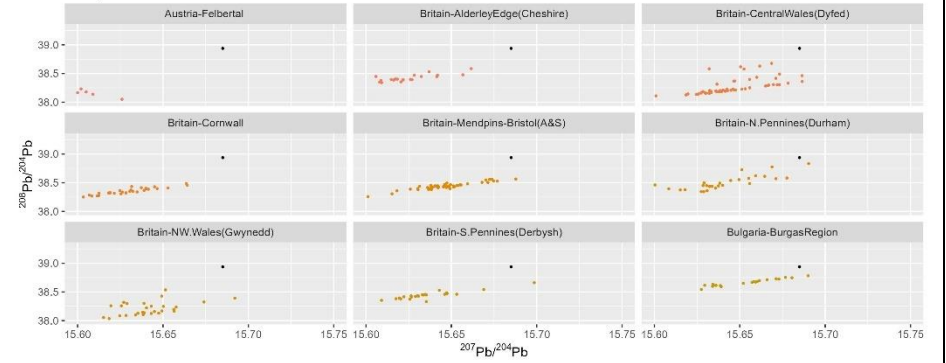

Sample MS049

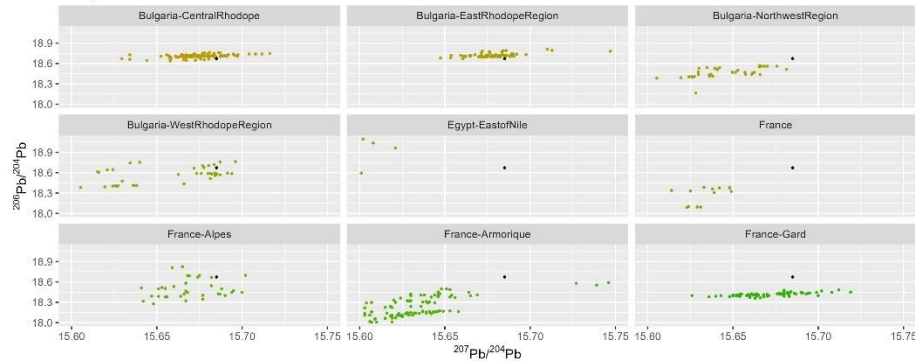

Sample MS049

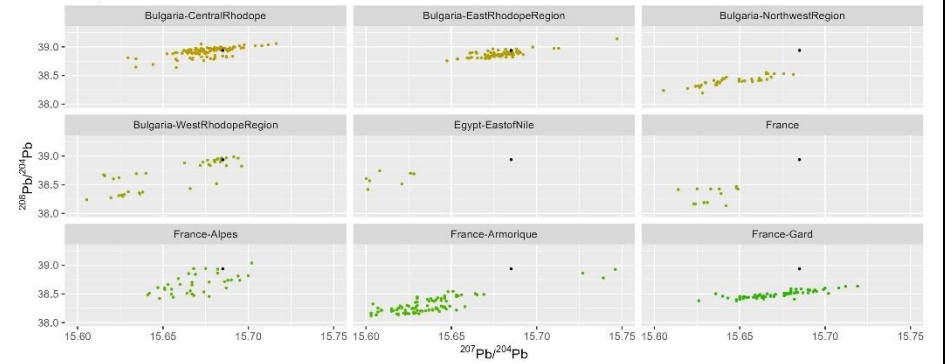

Sample MS049

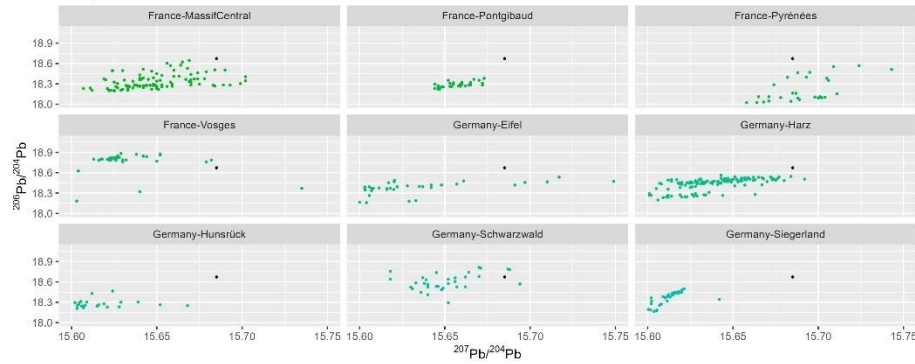

Sample MS049

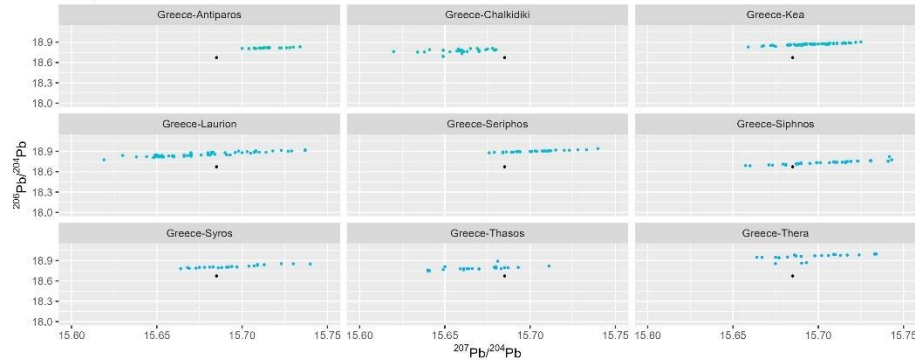

Sample MS049

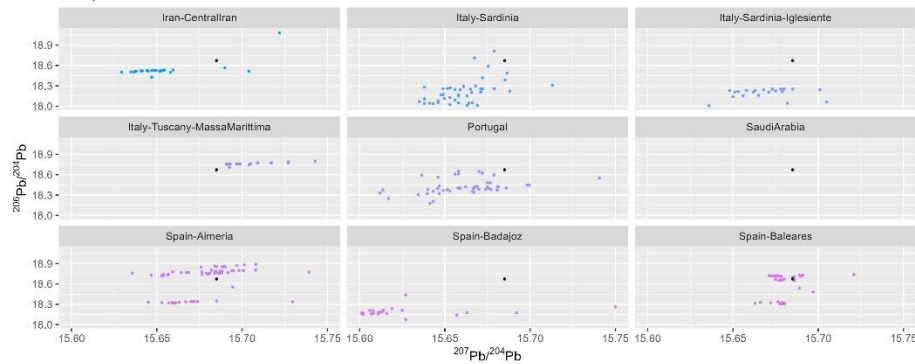

Sample MS049

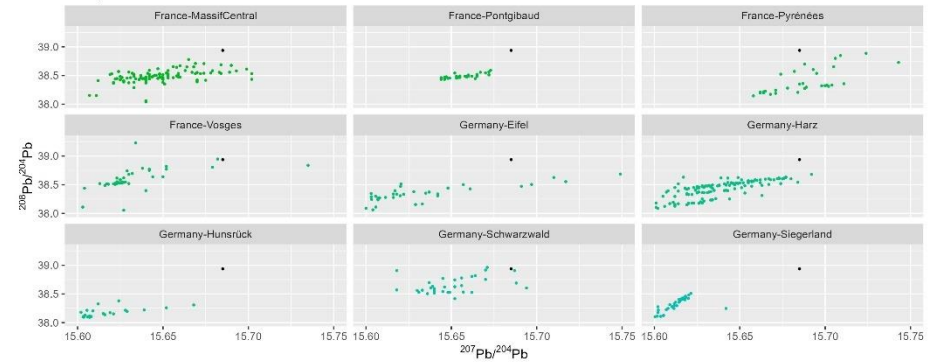

Sample MS049

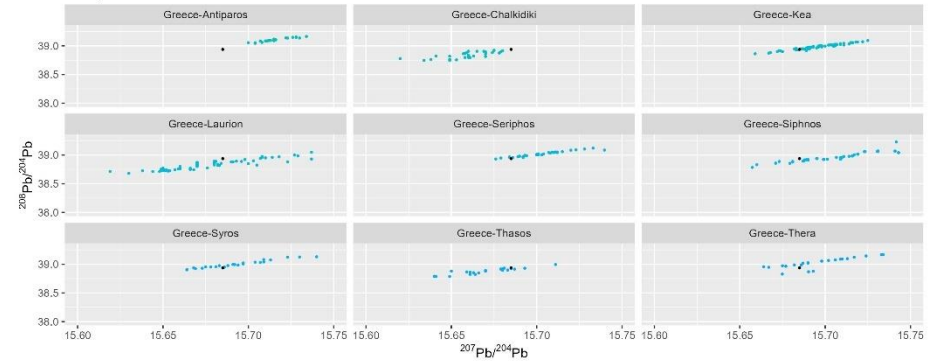

Sample MS049

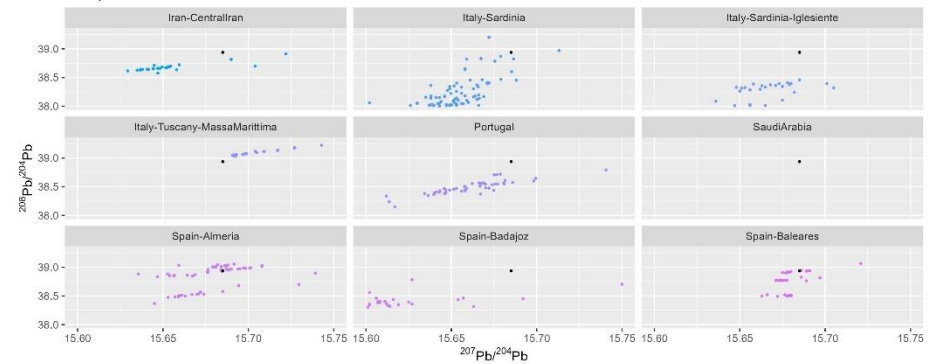

Sample MS049

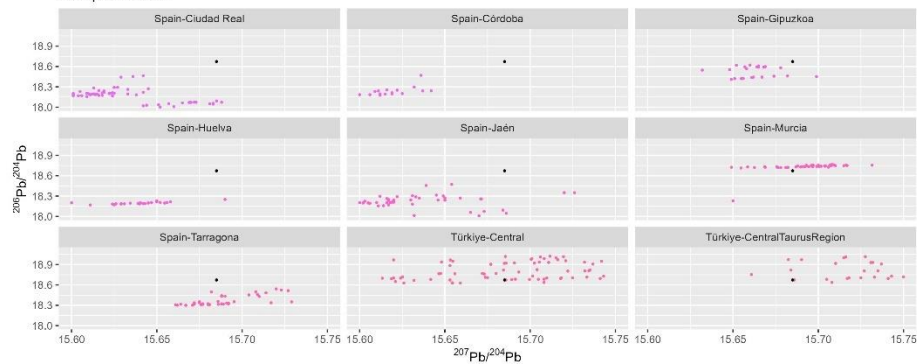

Sample MS049

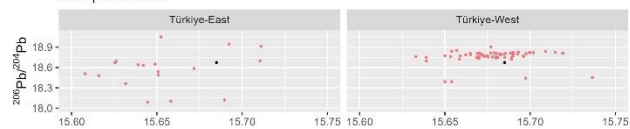

207Pb/204Pb

Sample MS050

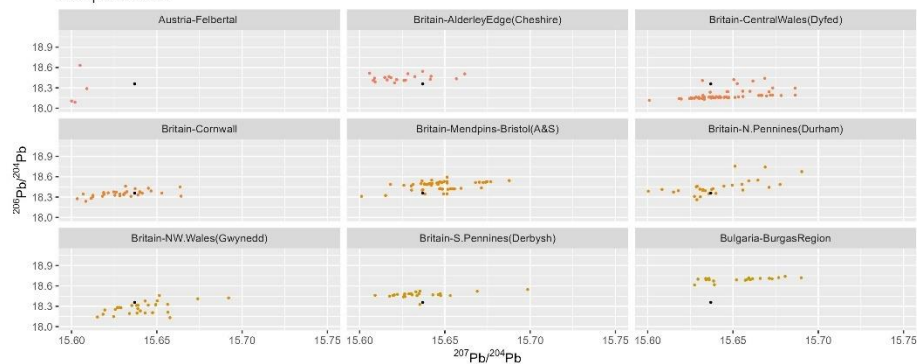

Sample MS049

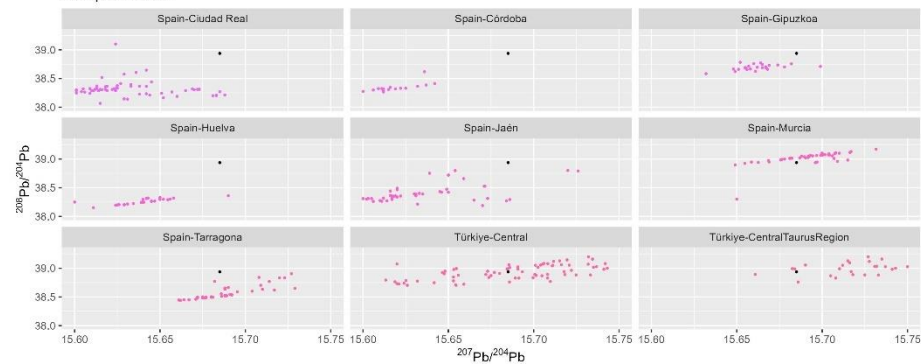

Sample MS049

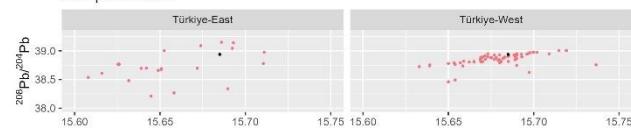

207Pb/204Pb

Sample MS050

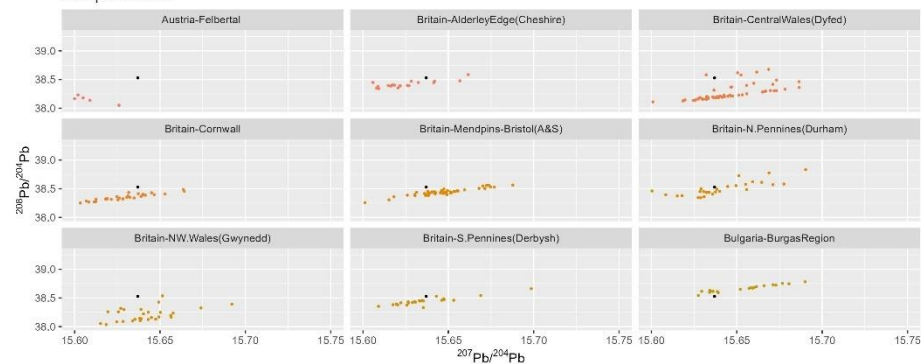



Sample MS050

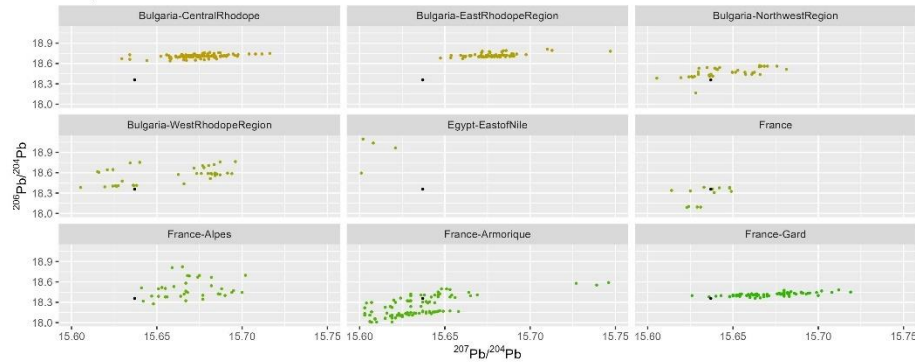

Sample MS050

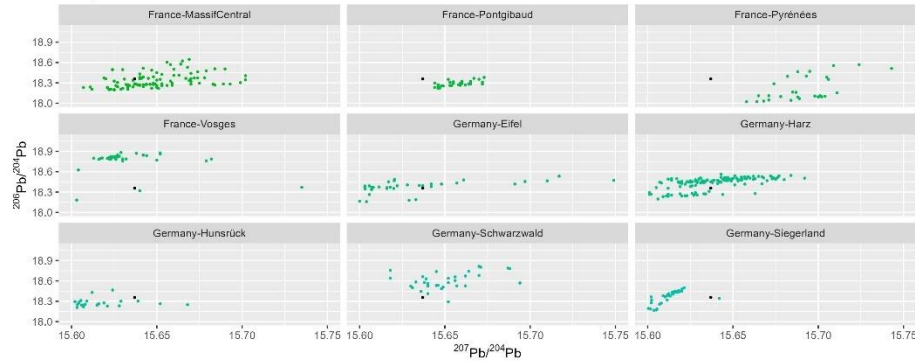

Sample MS050

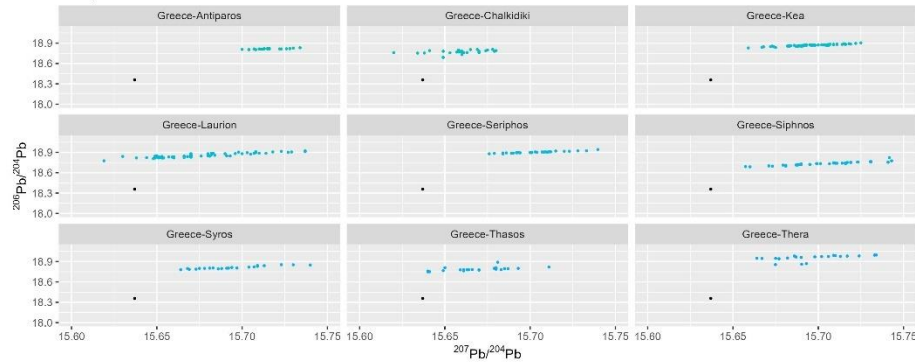

Sample MS050

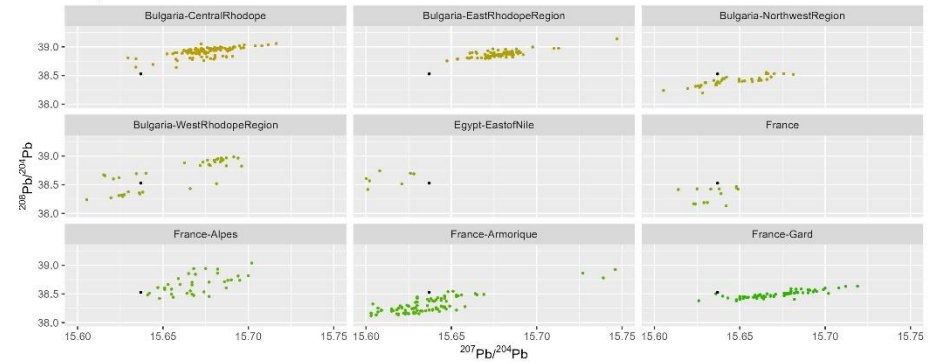

Sample MS050

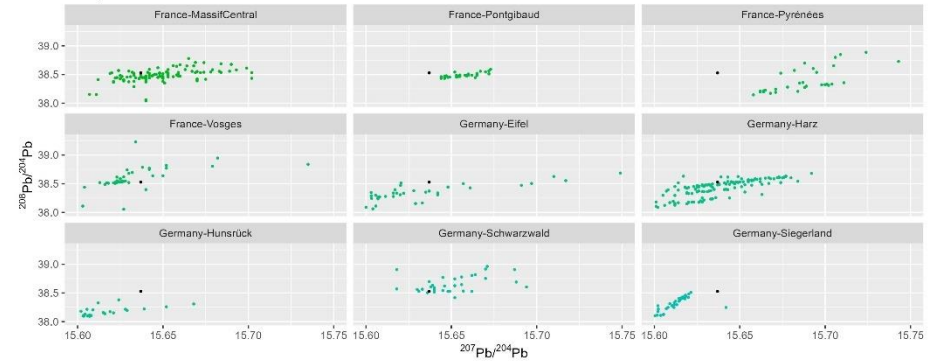

Sample MS050

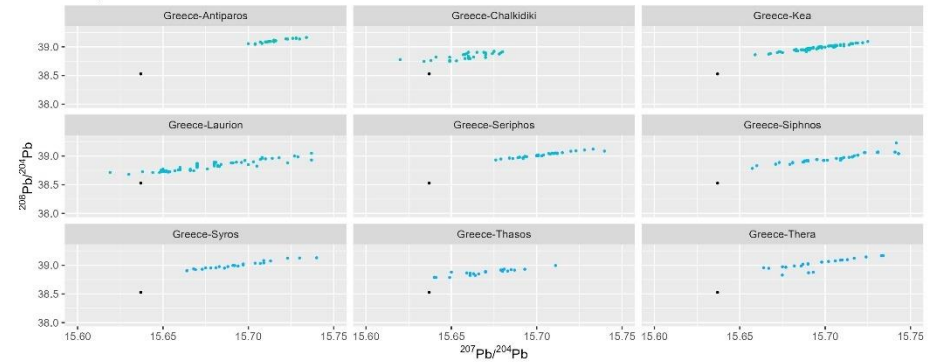



Sample MS050

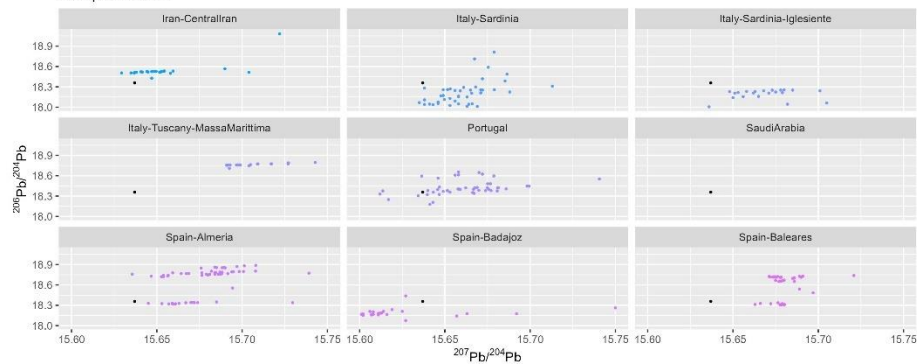

Sample MS050

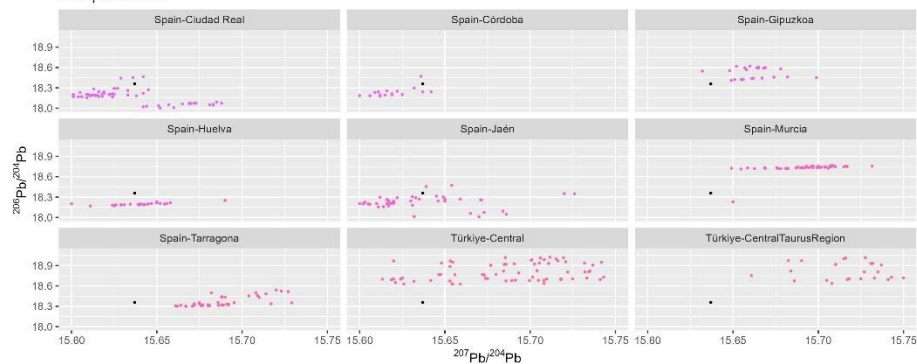

Sample MS050

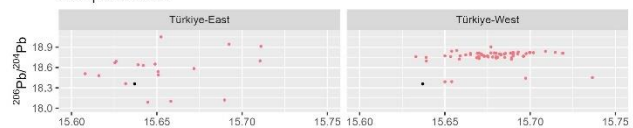 $^{207}\text{Pb}/^{204}\text{Pb}$ 

Sample MS050

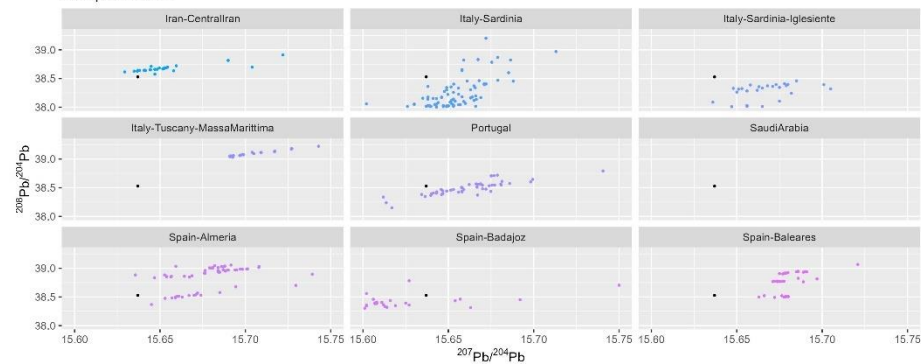

Sample MS050

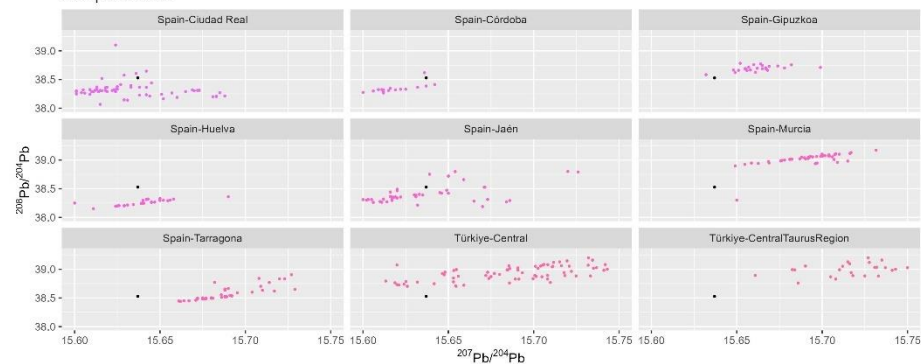

Sample MS050

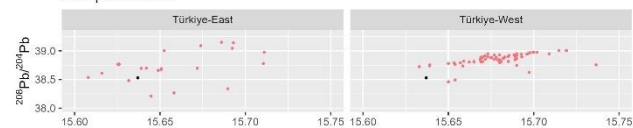 $^{207}\text{Pb}/^{204}\text{Pb}$

Sample MS051

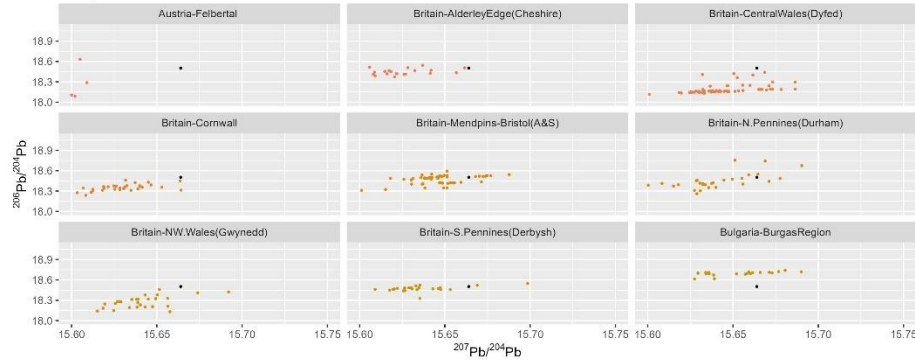

Sample MS051

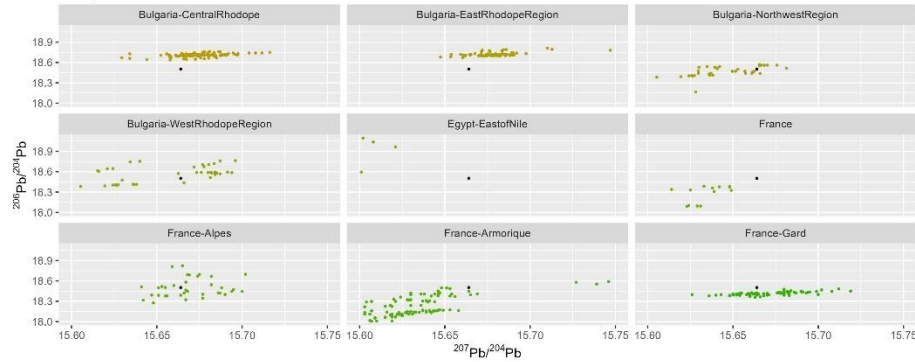

Sample MS051

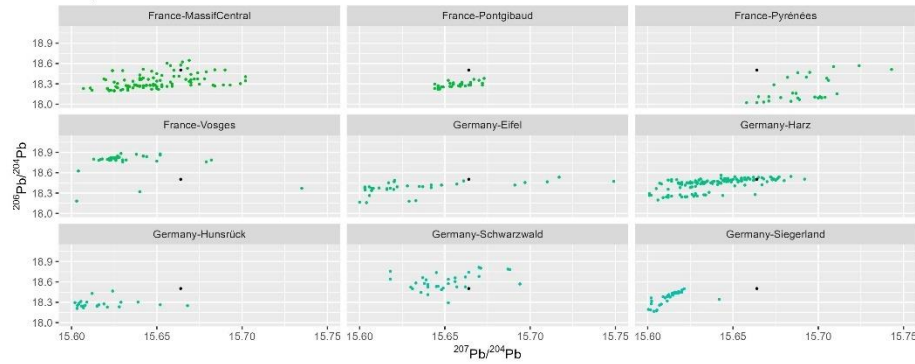

Sample MS051

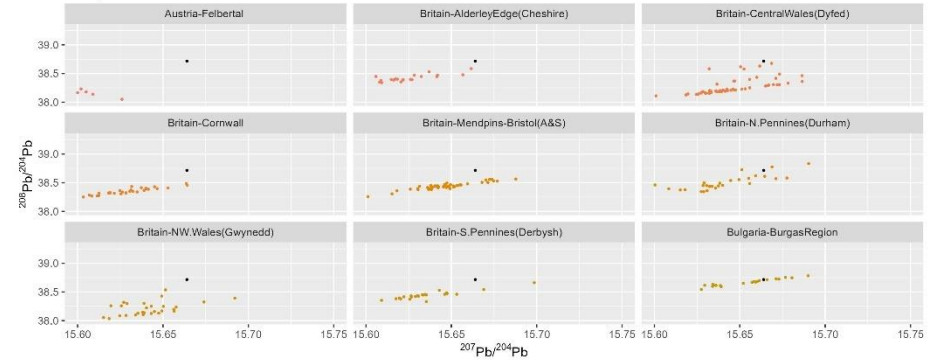

Sample MS051

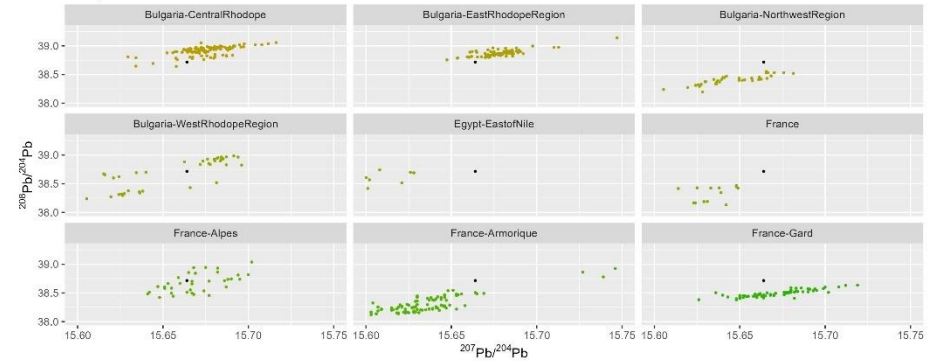

Sample MS051

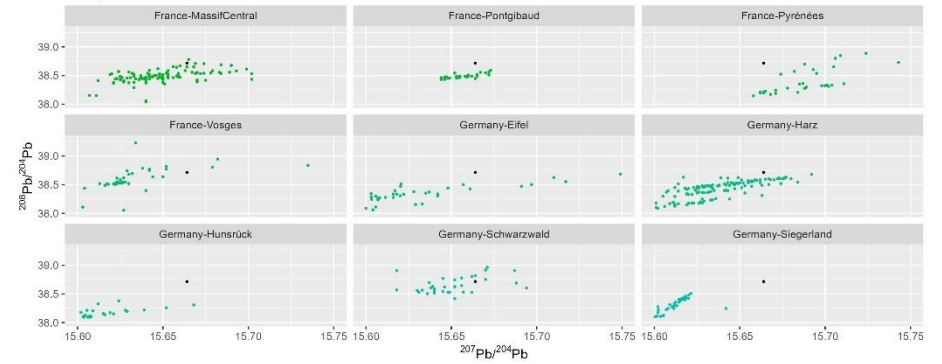

Sample MS051

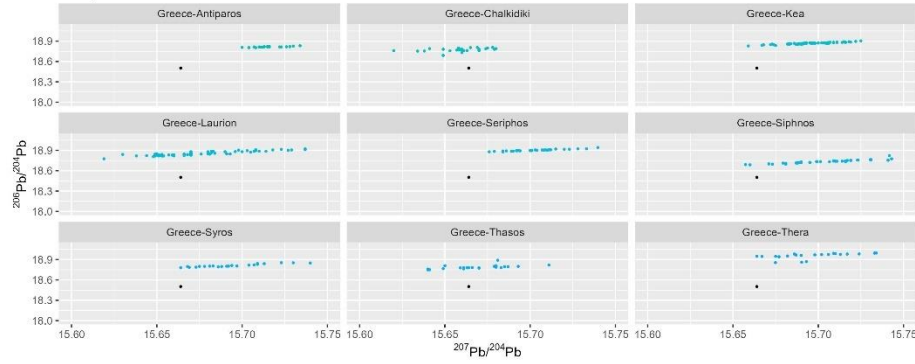

Sample MS051

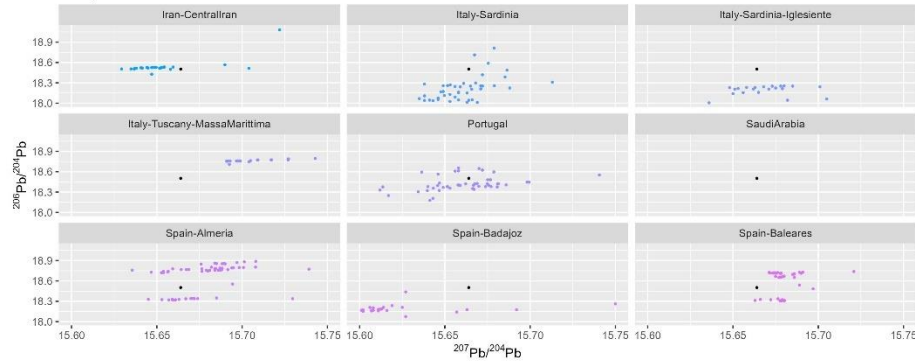

Sample MS051

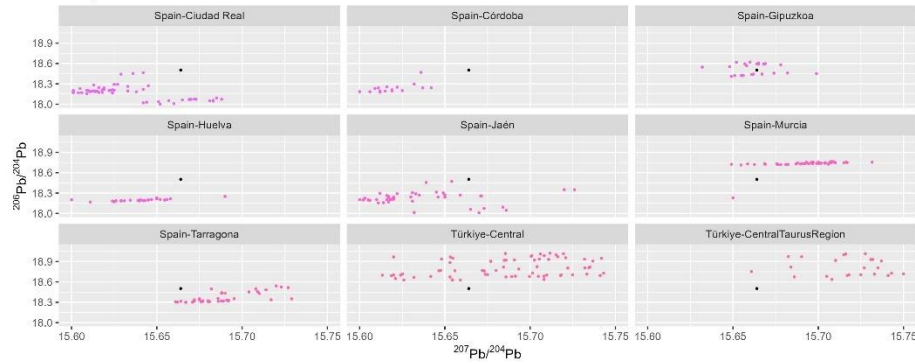

Sample MS051

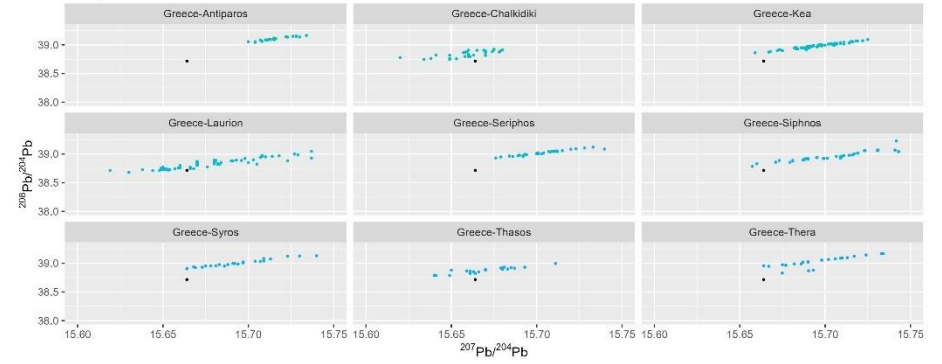

Sample MS051

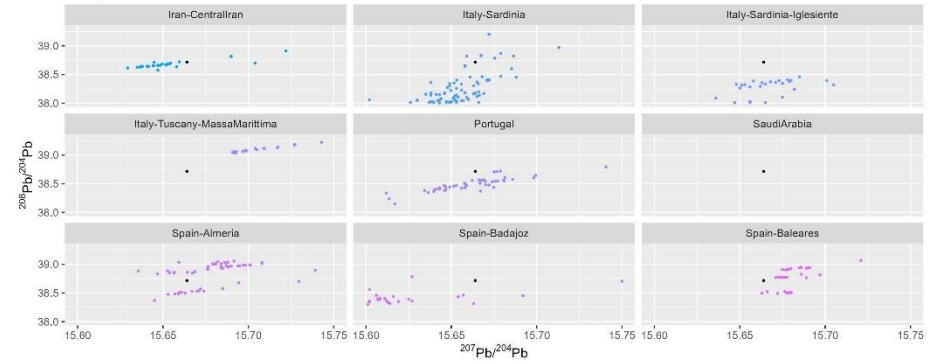

Sample MS051

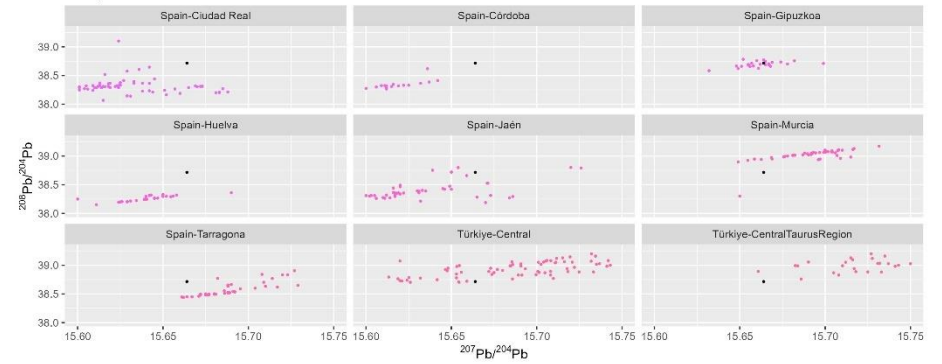

Sample MS051

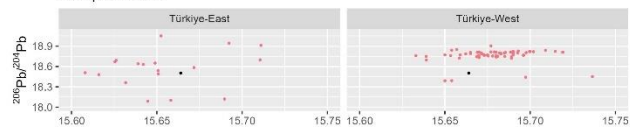 $^{207}\text{Pb}/^{204}\text{Pb}$ 

Sample MS052

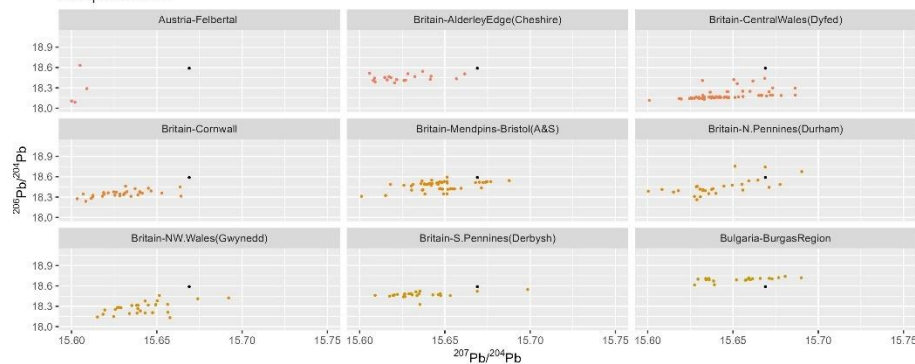 $^{207}\text{Pb}/^{204}\text{Pb}$ 

Sample MS052

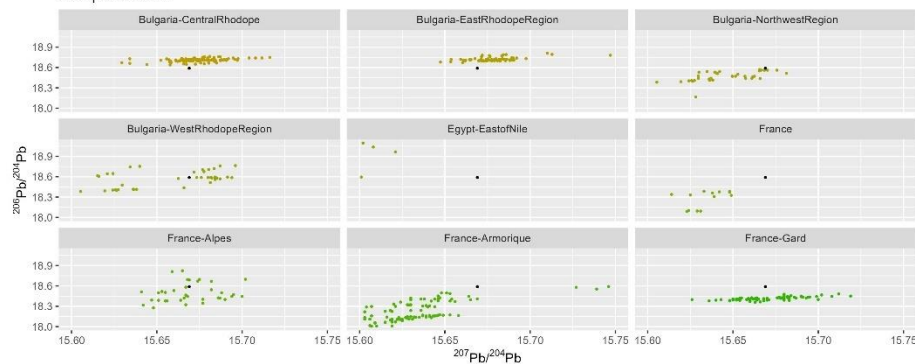 $^{207}\text{Pb}/^{204}\text{Pb}$ 

Sample MS051

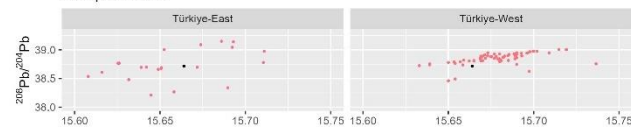 $^{207}\text{Pb}/^{204}\text{Pb}$ 

Sample MS052

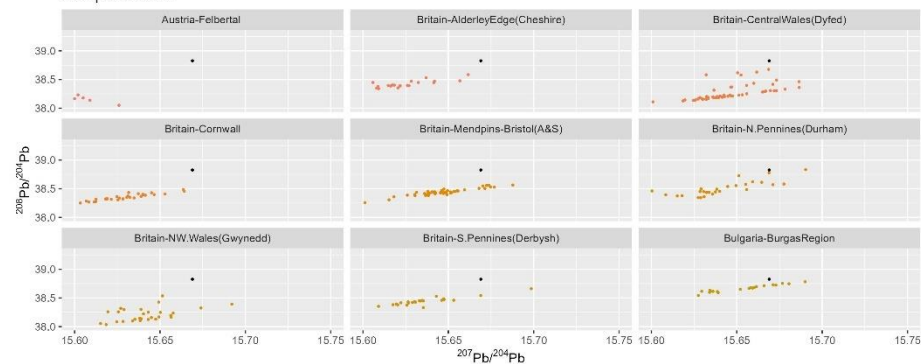 $^{207}\text{Pb}/^{204}\text{Pb}$ 

Sample MS052

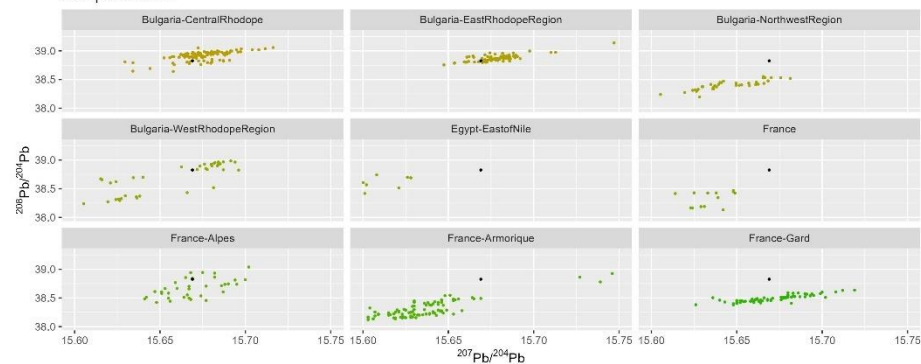 $^{207}\text{Pb}/^{204}\text{Pb}$



Sample MS052

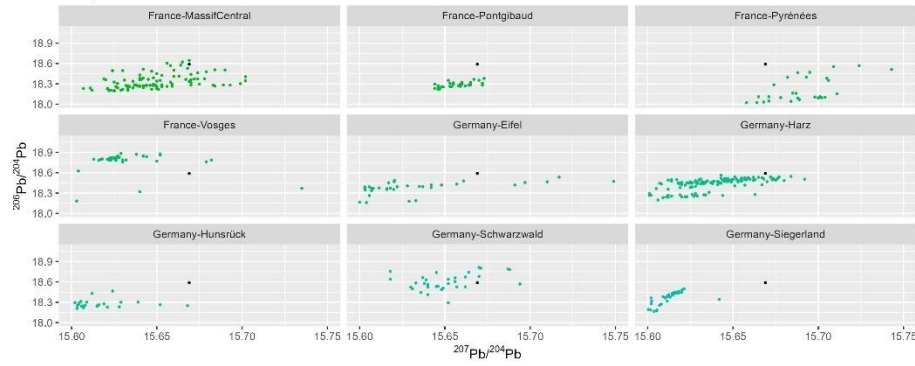

Sample MS052

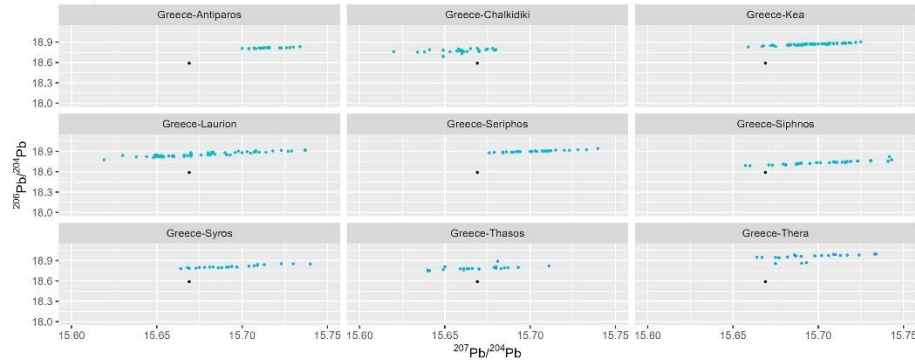

Sample MS052

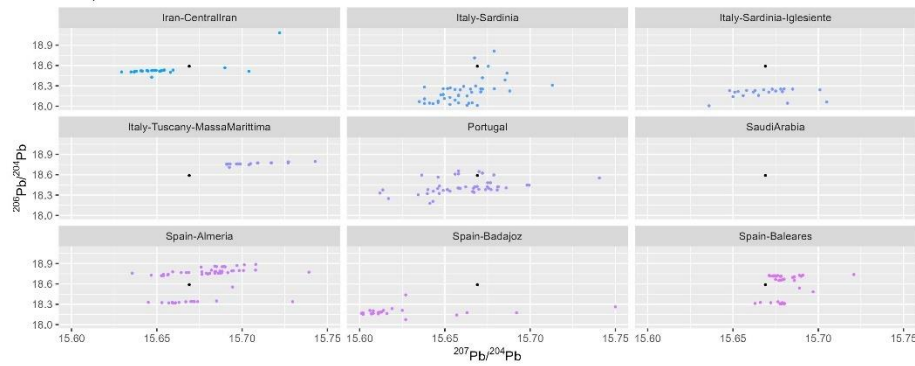

Sample MS052

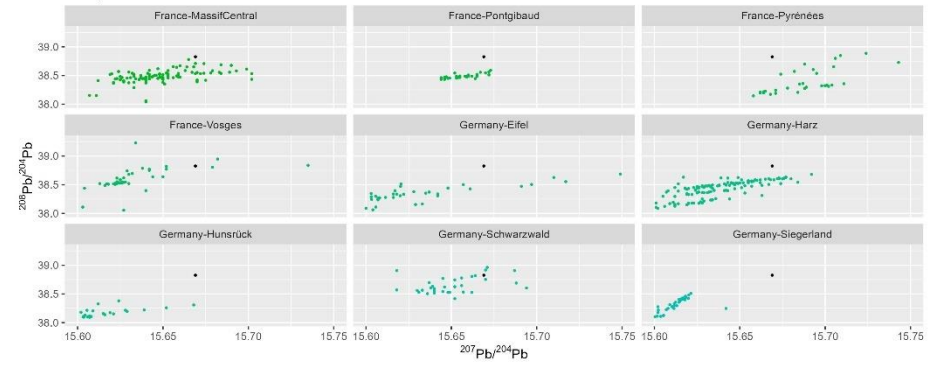

Sample MS052

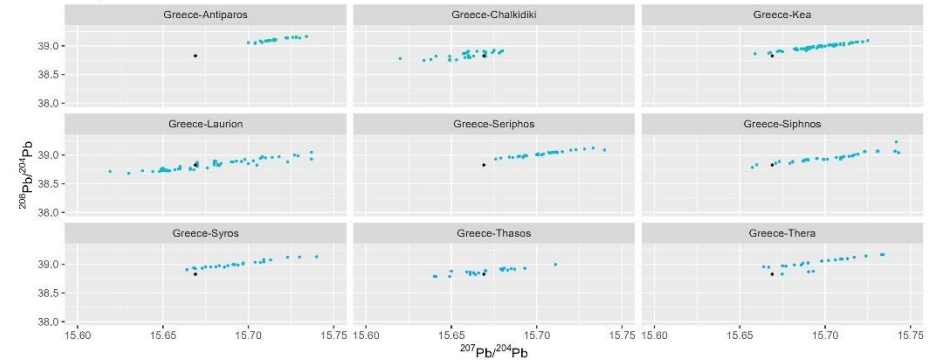

Sample MS052

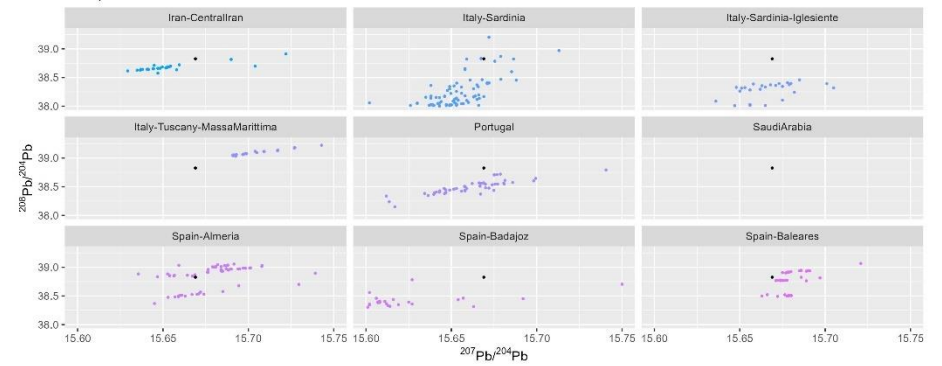



Sample MS052

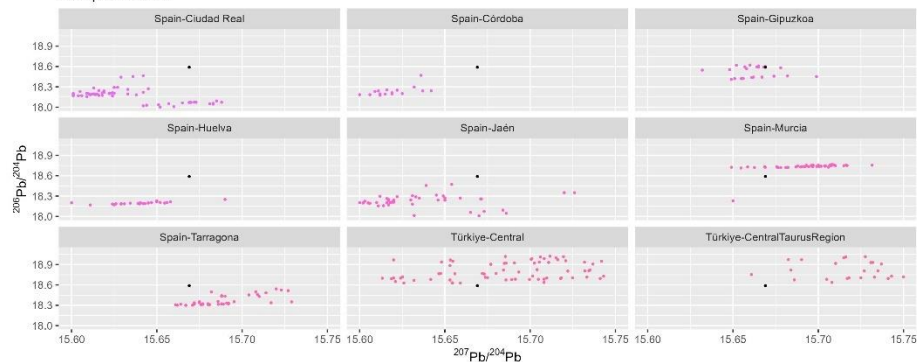

Sample MS052

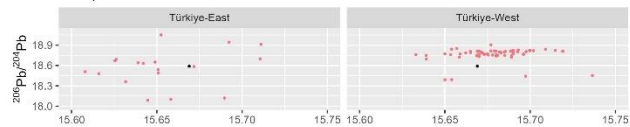

207Pb/204Pb

Sample MS053

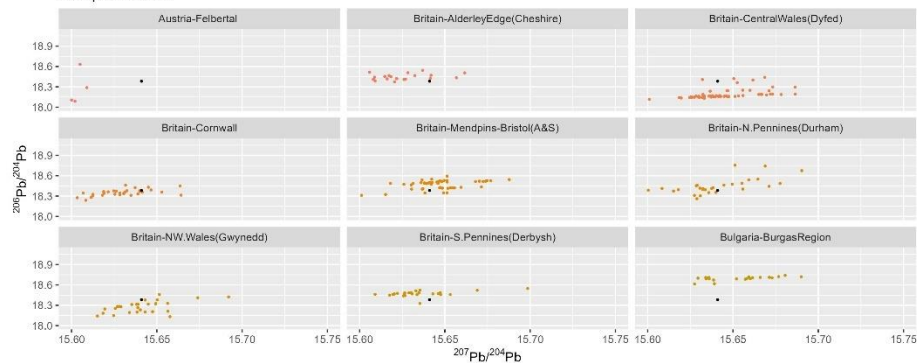

Sample MS052

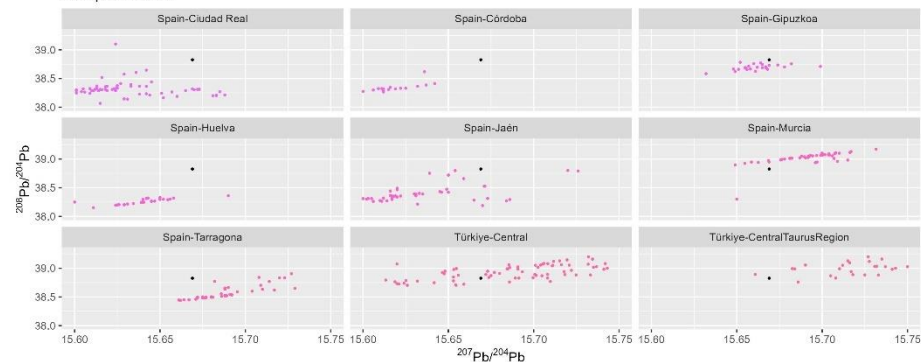

Sample MS052

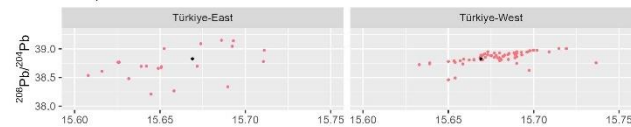

207Pb/204Pb

Sample MS053

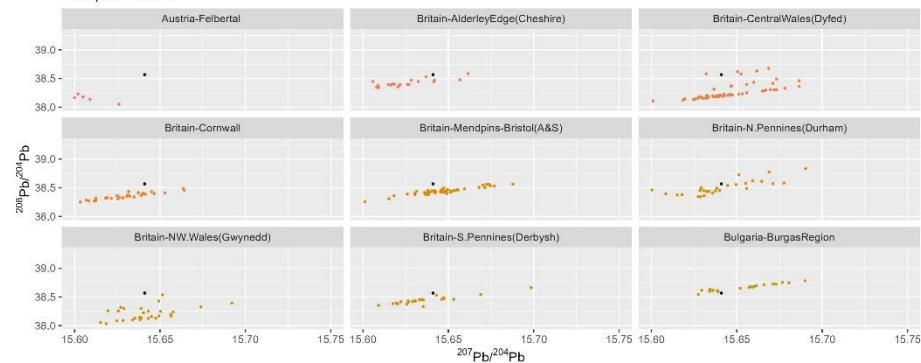

Sample MS053

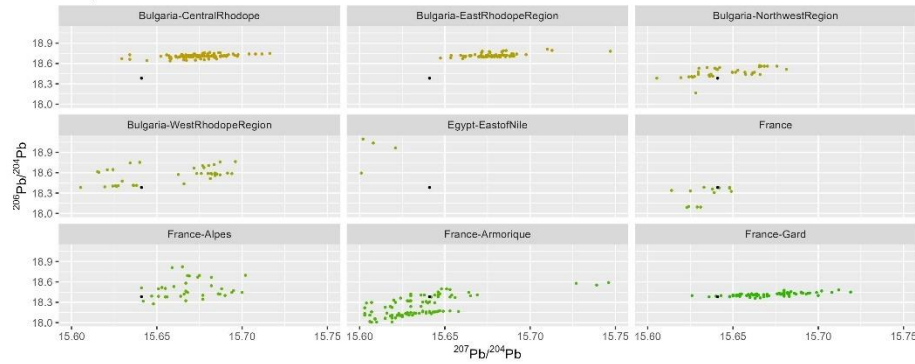

Sample MS053

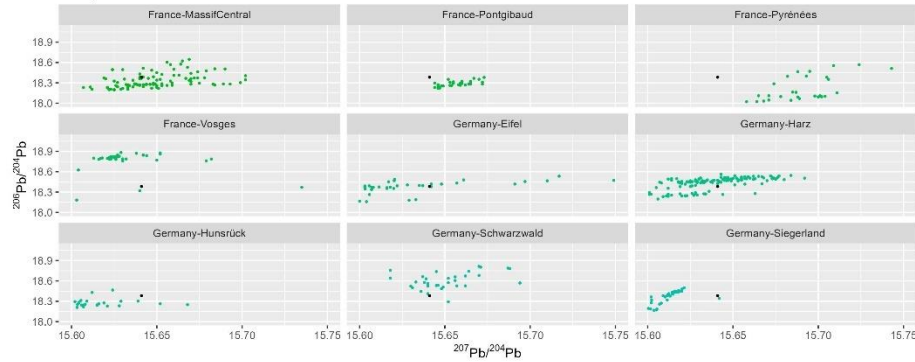

Sample MS053

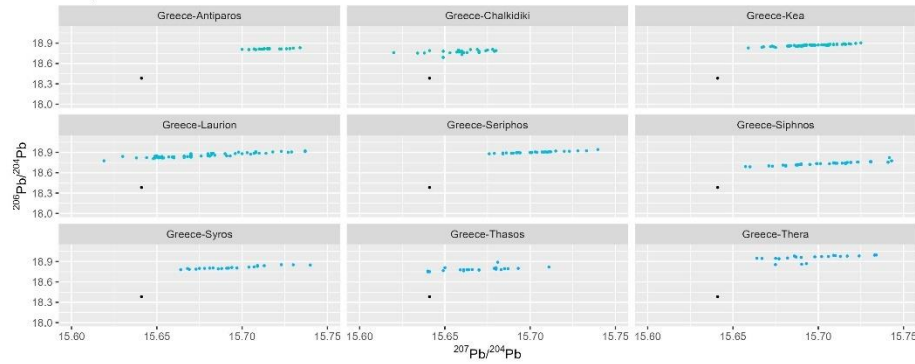

Sample MS053

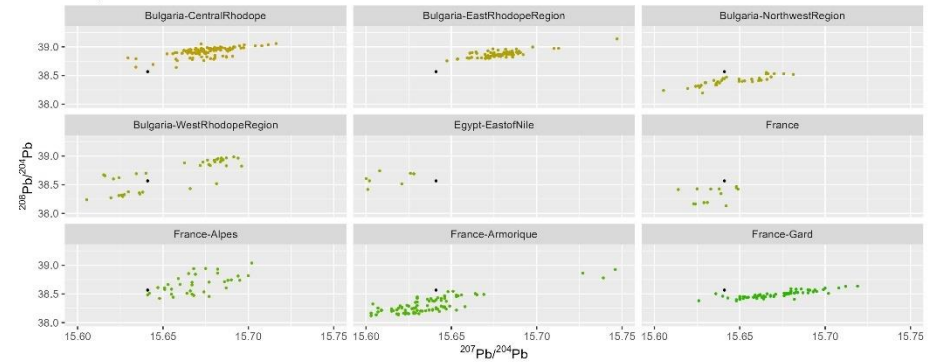

Sample MS053

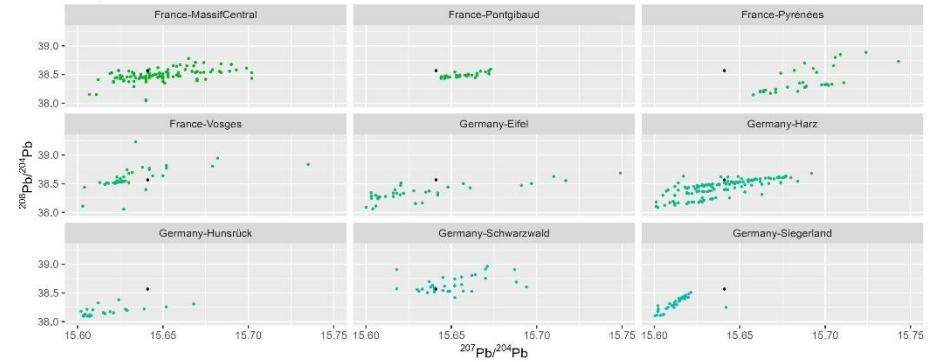

Sample MS053

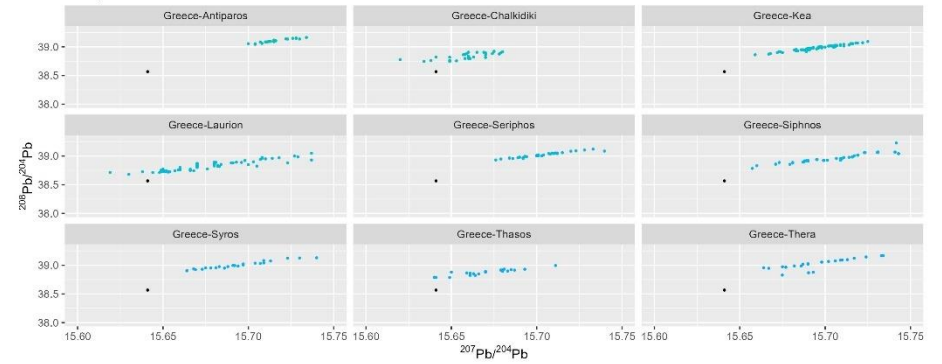

Sample MS053

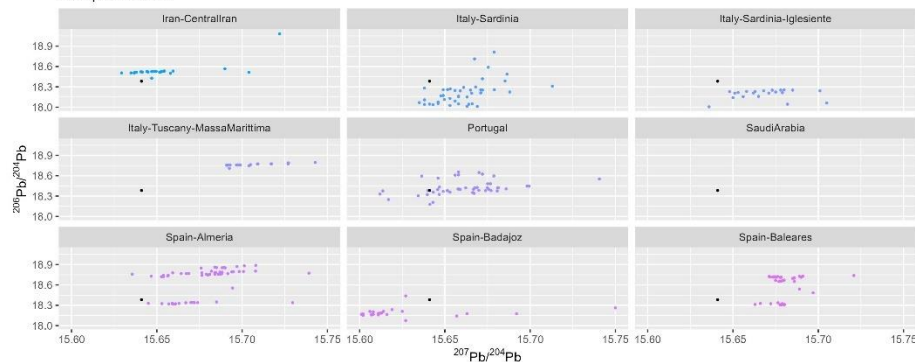

Sample MS053

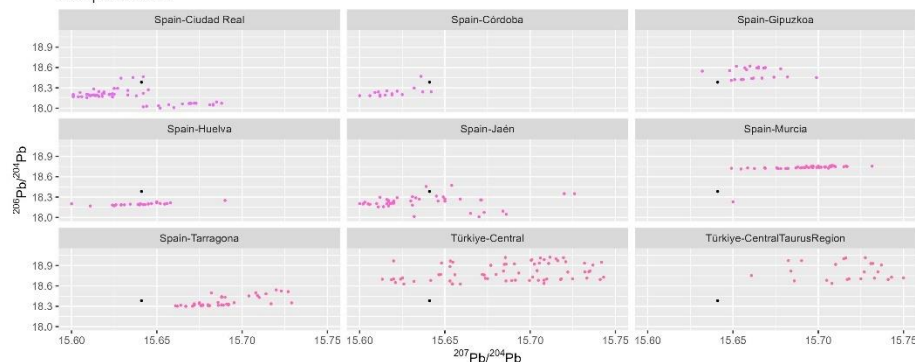

Sample MS053

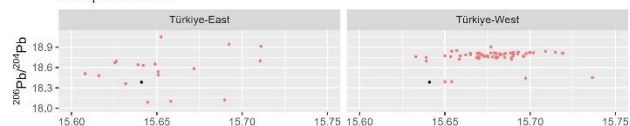

$^{207}\text{Pb}/^{204}\text{Pb}$

Sample MS053

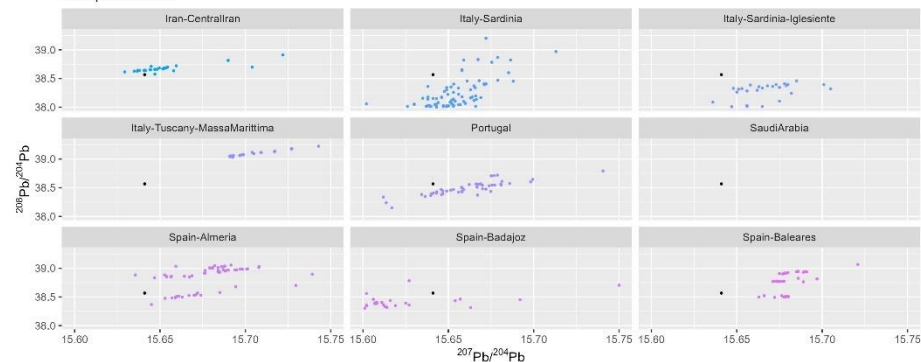

Sample MS053

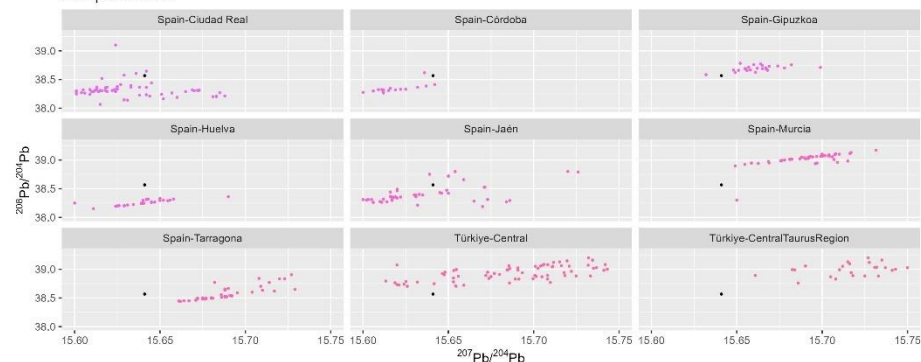

Sample MS053

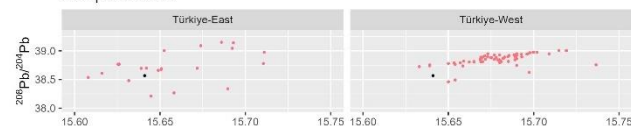

$^{207}\text{Pb}/^{204}\text{Pb}$

Sample MS054

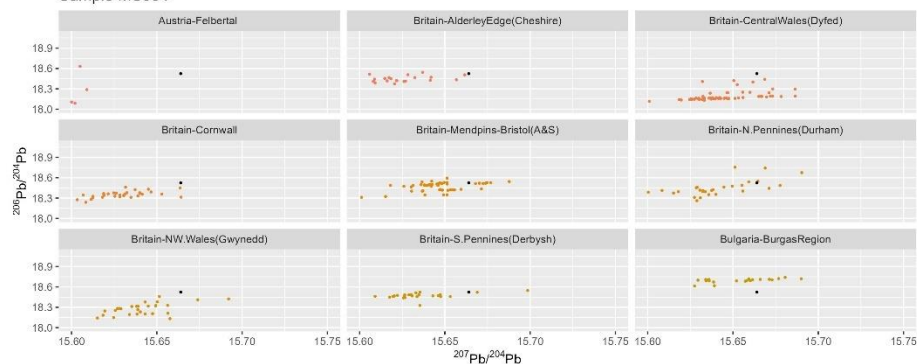

Sample MS054

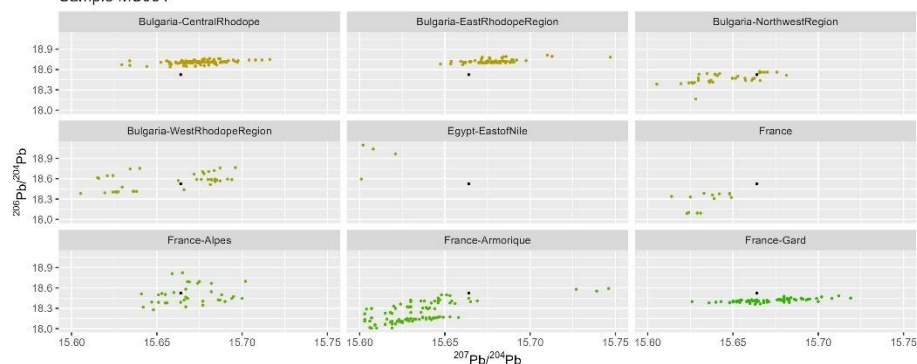

Sample MS054

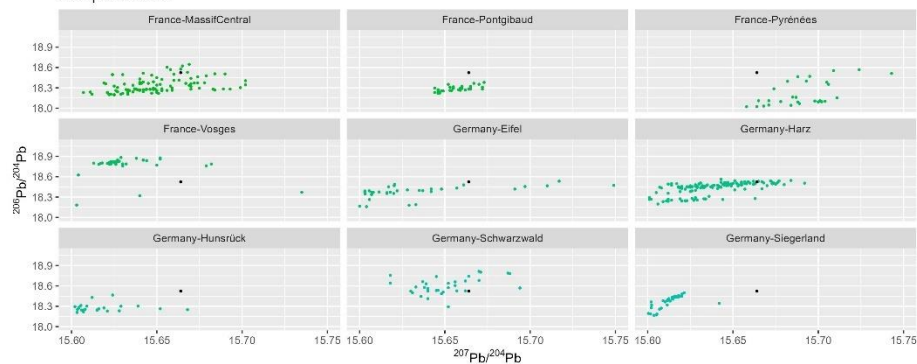

Sample MS054

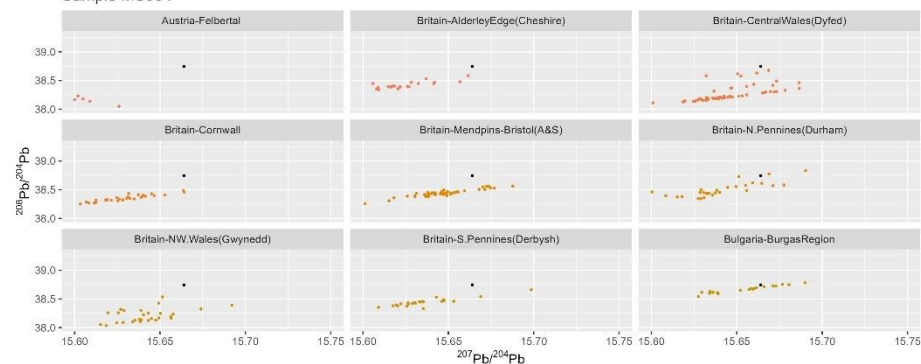

Sample MS054

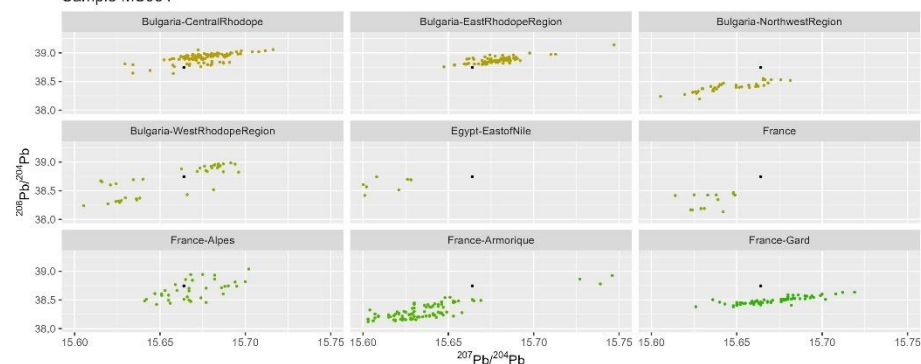

Sample MS054

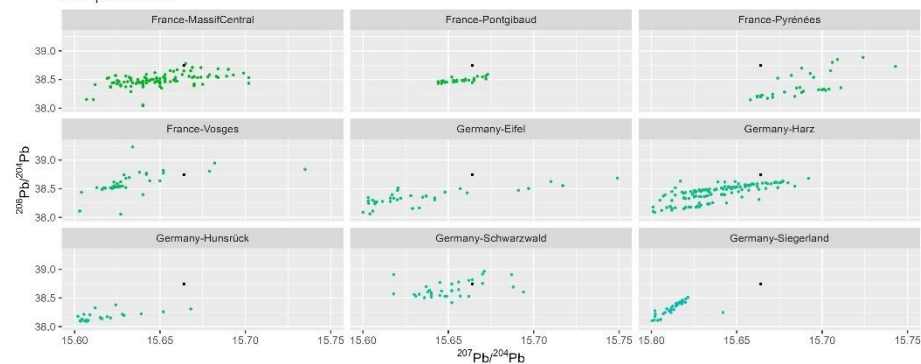



Sample MS054

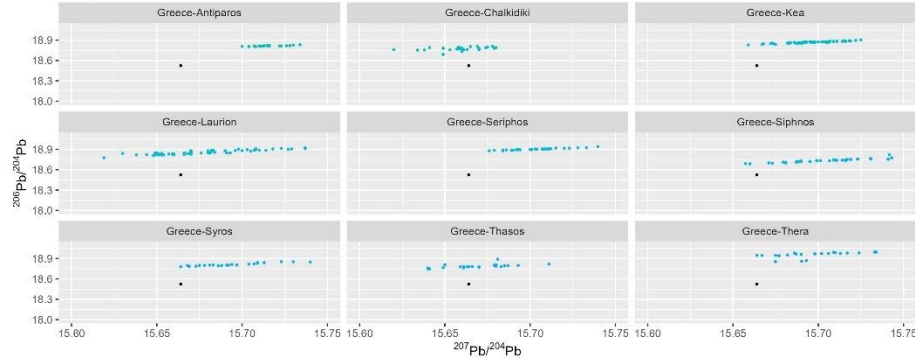

Sample MS054

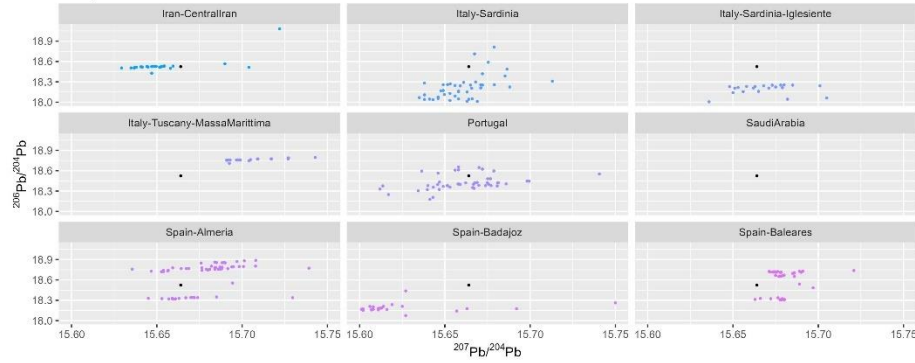

Sample MS054

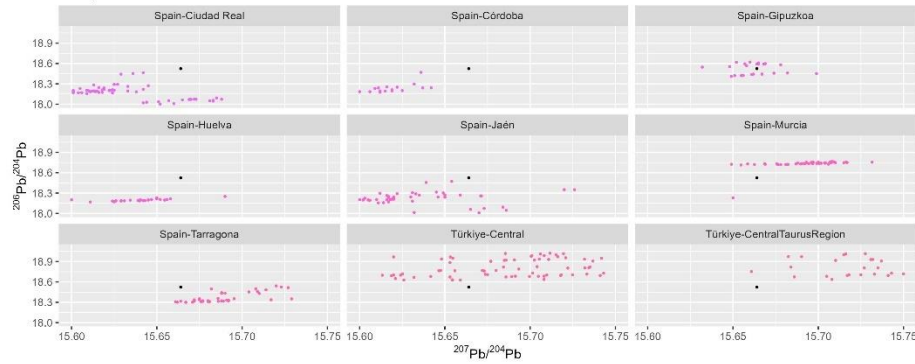

Sample MS054

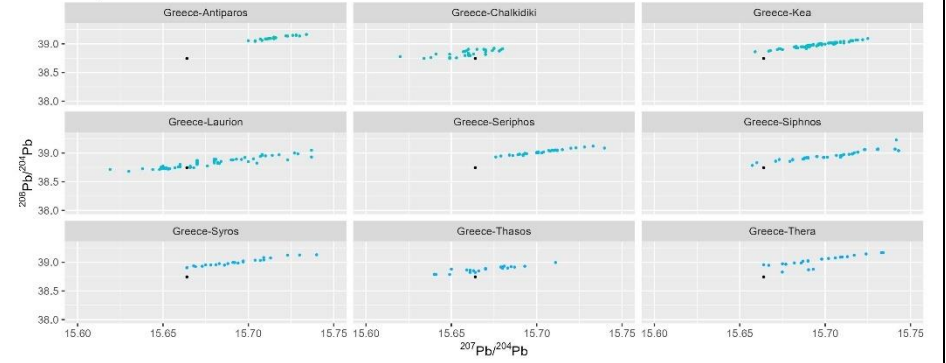

Sample MS054

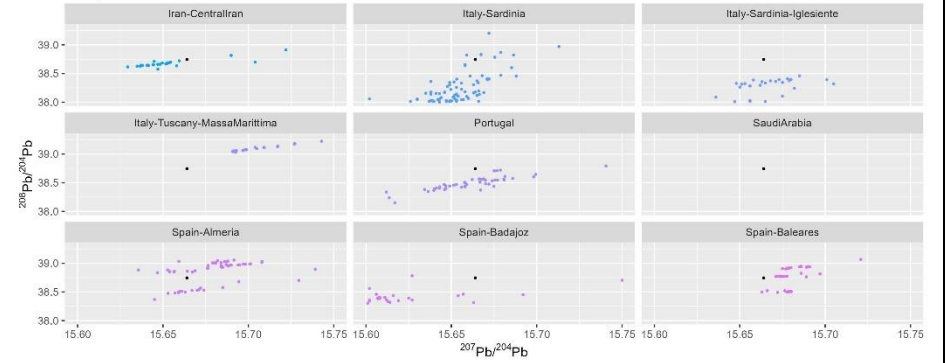

Sample MS054

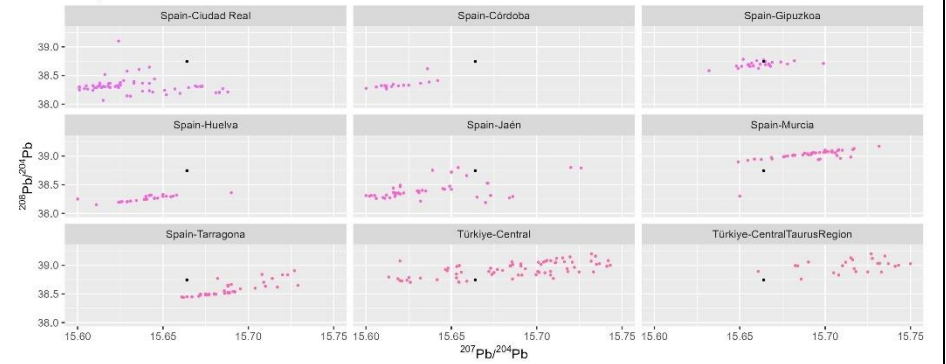



Sample MS054

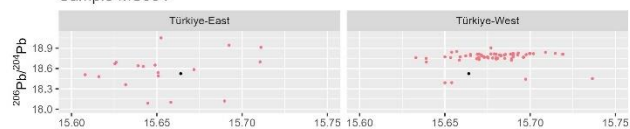 $^{207}\text{Pb}/^{204}\text{Pb}$ 

Sample MS055

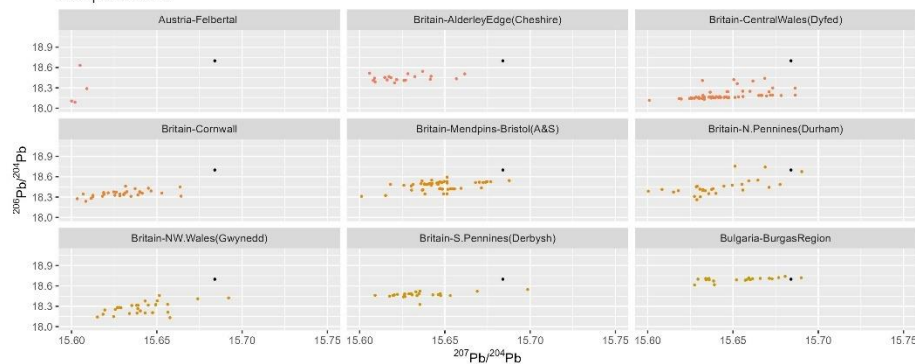 $^{207}\text{Pb}/^{204}\text{Pb}$ 

Sample MS055

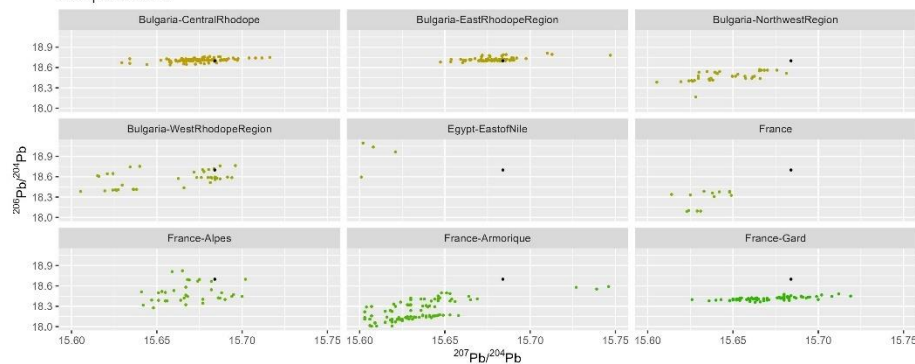 $^{207}\text{Pb}/^{204}\text{Pb}$ 

Sample MS054

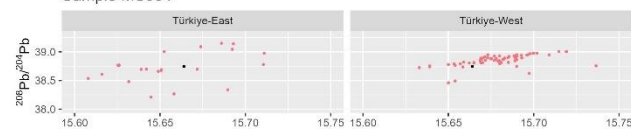 $^{207}\text{Pb}/^{204}\text{Pb}$ 

Sample MS055

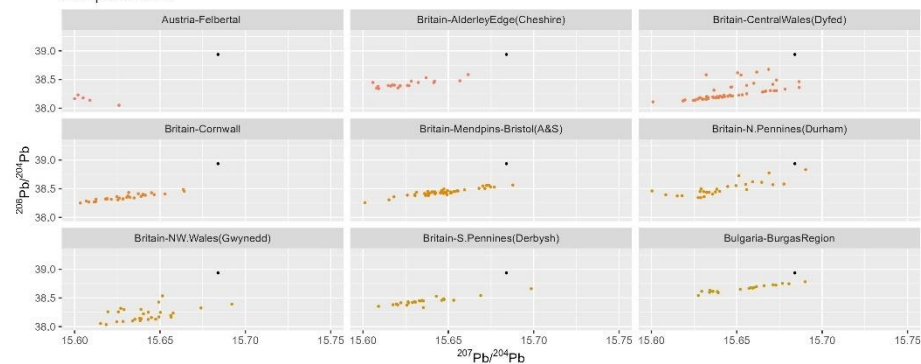 $^{207}\text{Pb}/^{204}\text{Pb}$ 

Sample MS055

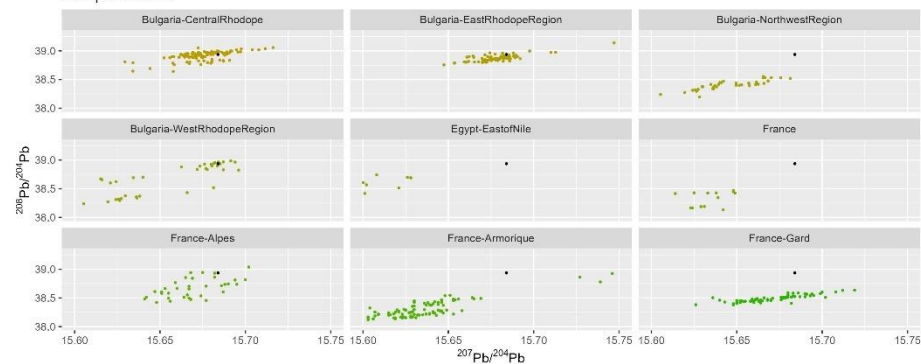 $^{207}\text{Pb}/^{204}\text{Pb}$

Sample MS055

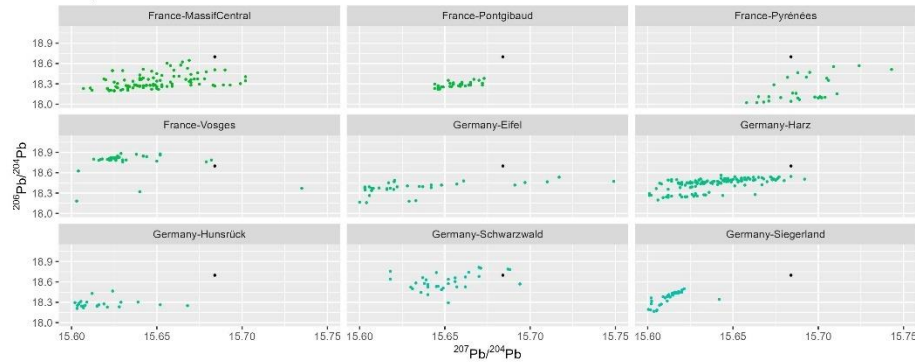

Sample MS055

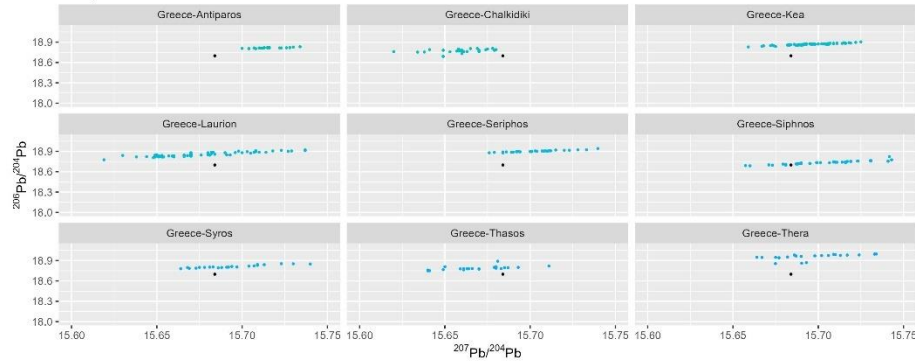

Sample MS055

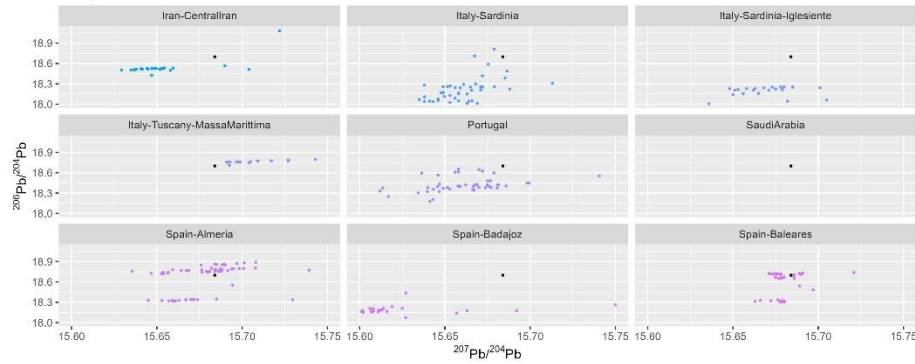

Sample MS055

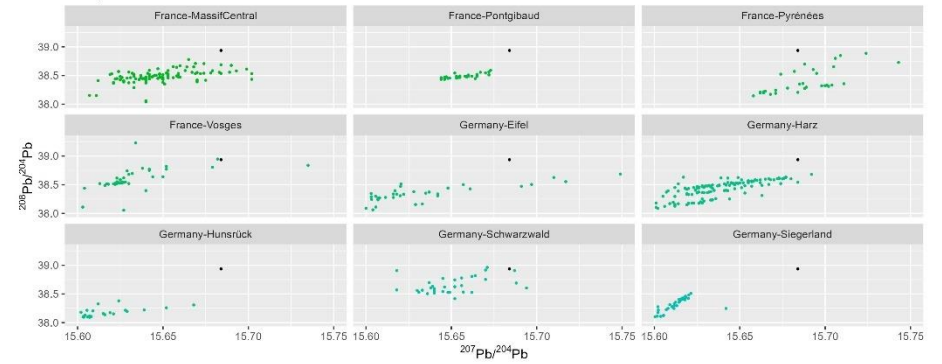

Sample MS055

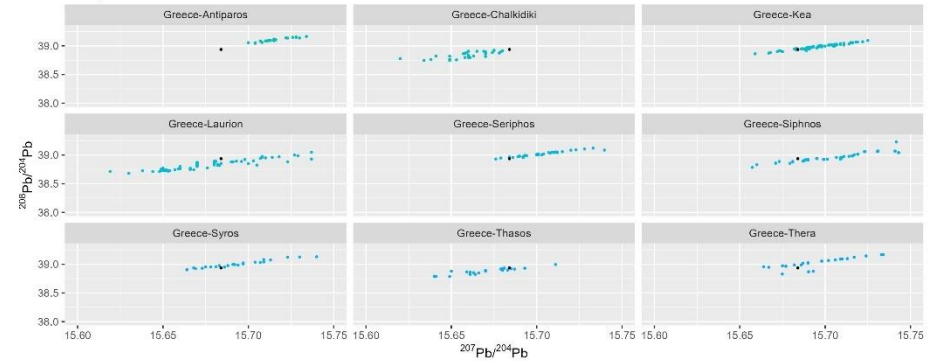

Sample MS055

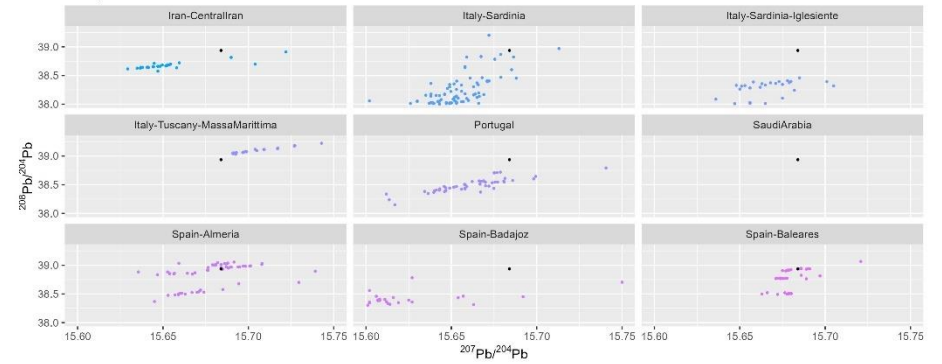

Sample MS055

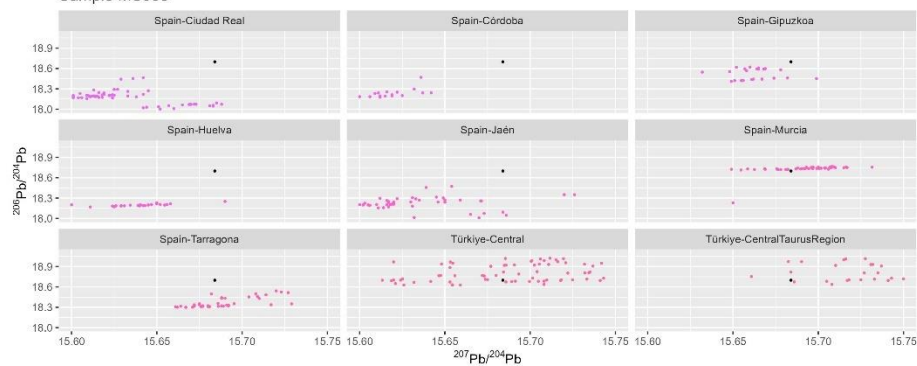

Sample MS055

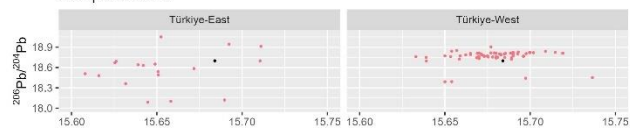 $^{207}\text{Pb}/^{204}\text{Pb}$ 

Sample MS056

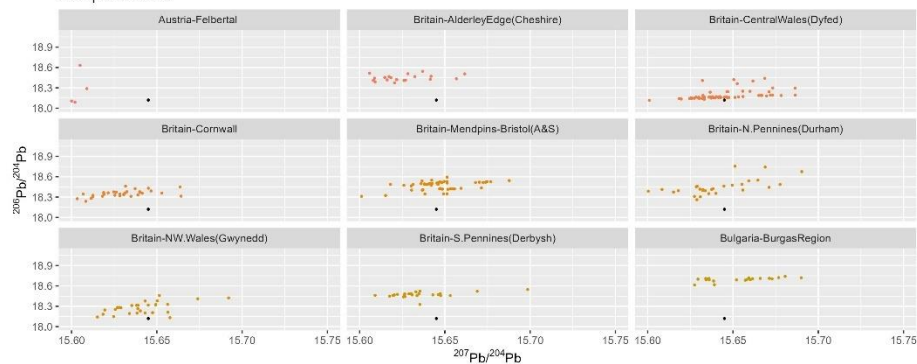 $^{207}\text{Pb}/^{204}\text{Pb}$ 

Sample MS055

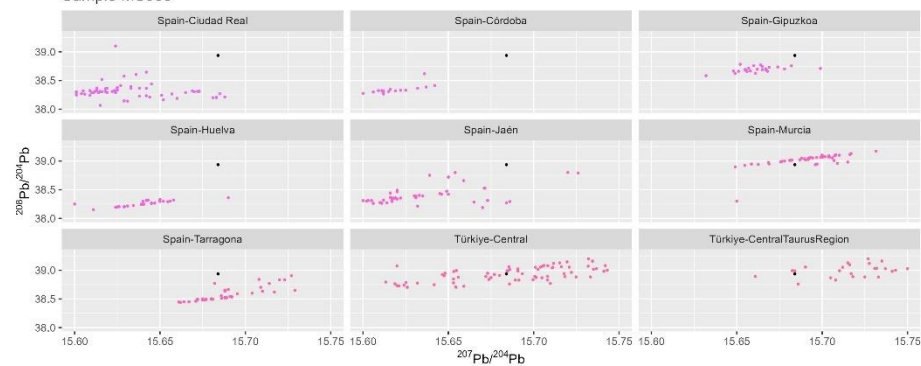

Sample MS055

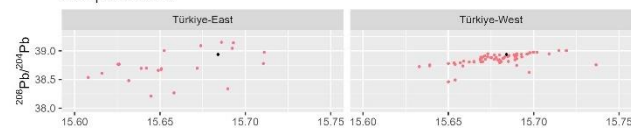 $^{207}\text{Pb}/^{204}\text{Pb}$ 

Sample MS056

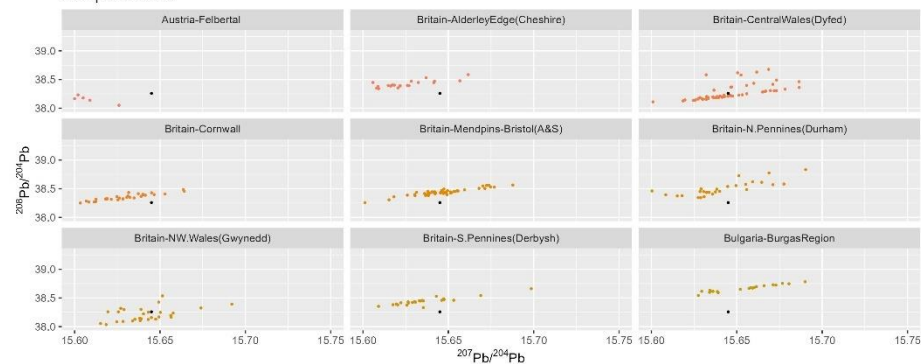 $^{207}\text{Pb}/^{204}\text{Pb}$

Sample MS056

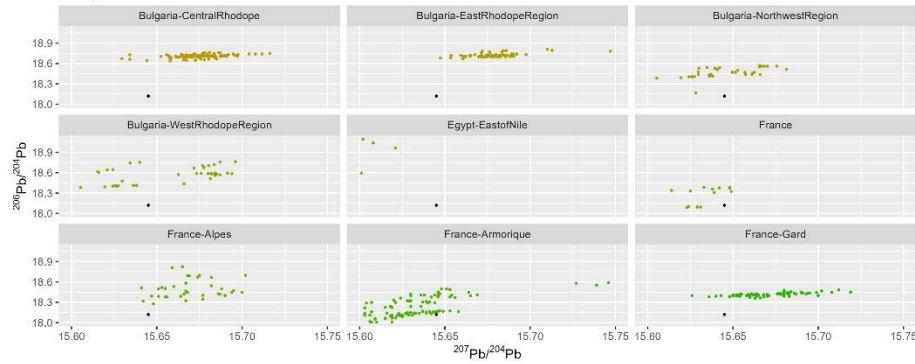

Sample MS056

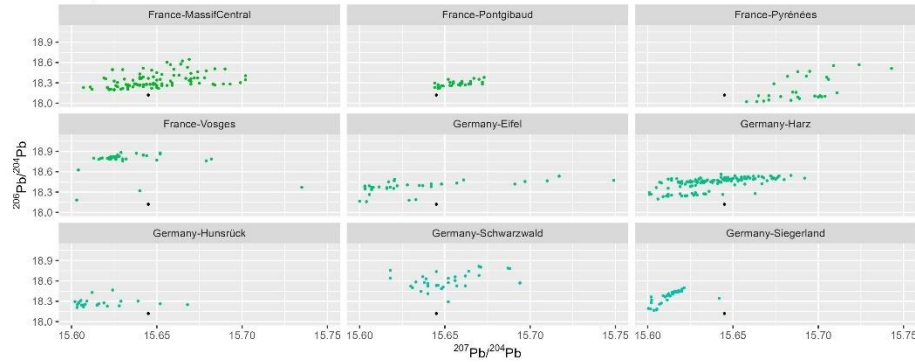

Sample MS056

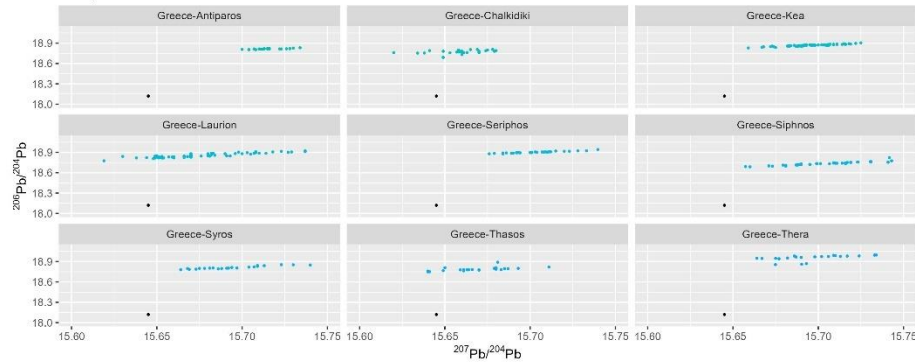

Sample MS056

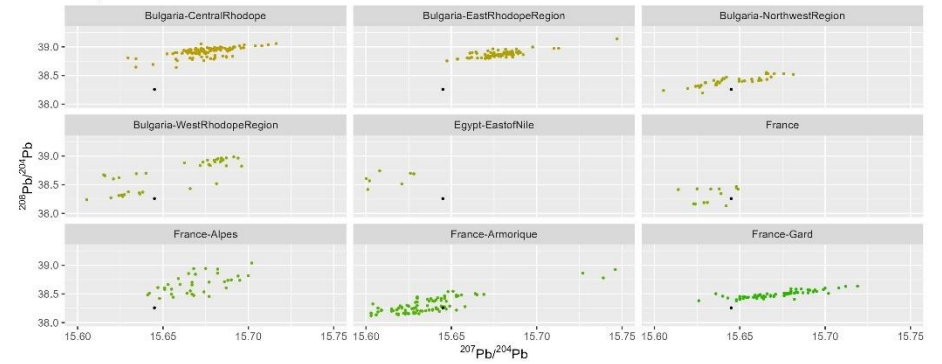

Sample MS056

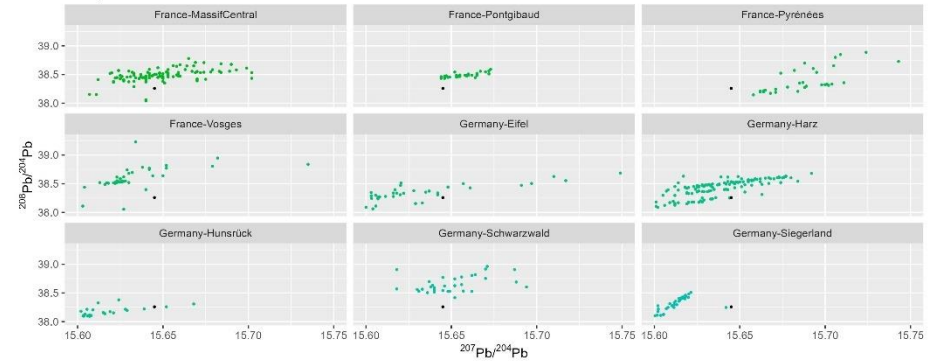

Sample MS056

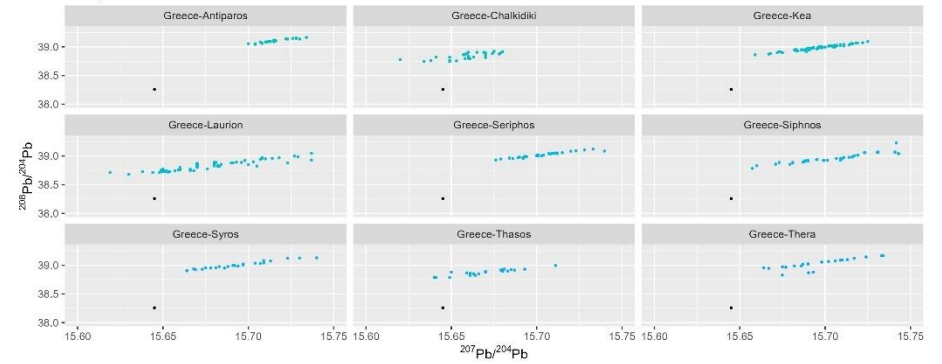

Sample MS056

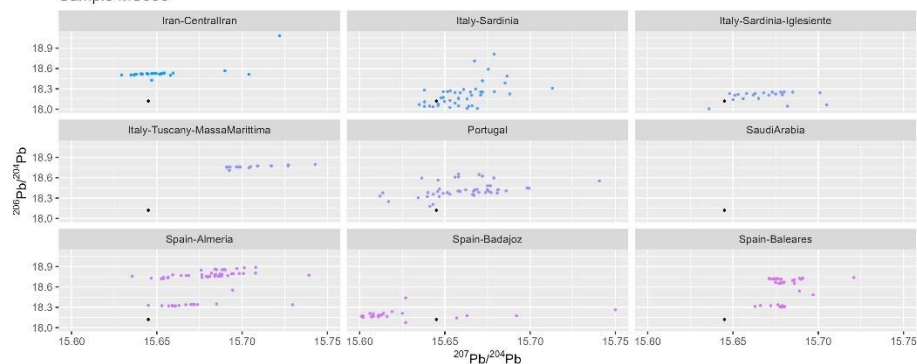

Sample MS056

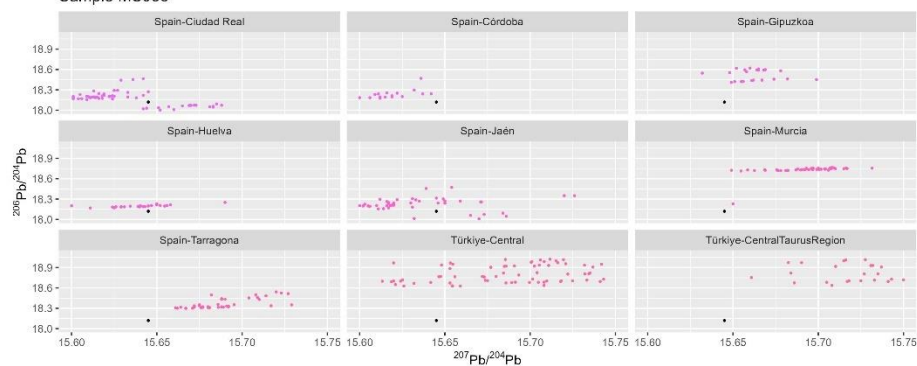

Sample MS056

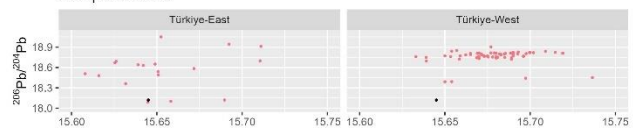

$^{207}\text{Pb}/^{204}\text{Pb}$

Sample MS056

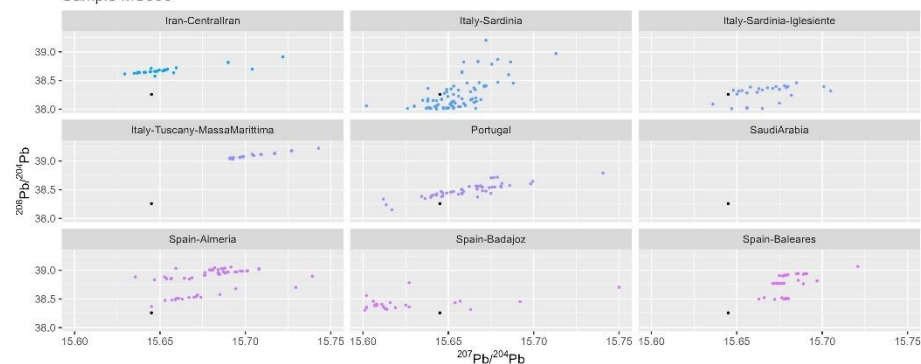

Sample MS056

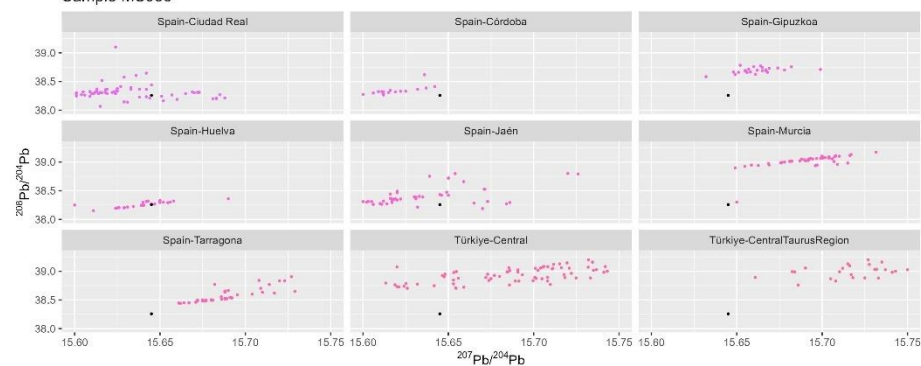

Sample MS056

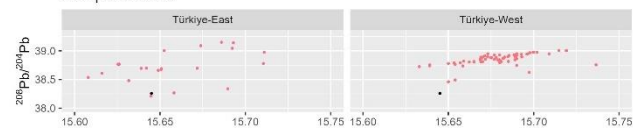

$^{207}\text{Pb}/^{204}\text{Pb}$



Sample MS057

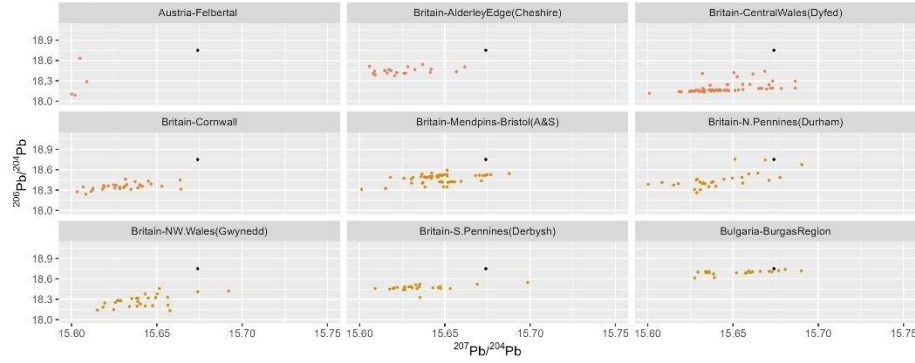

Sample MS057

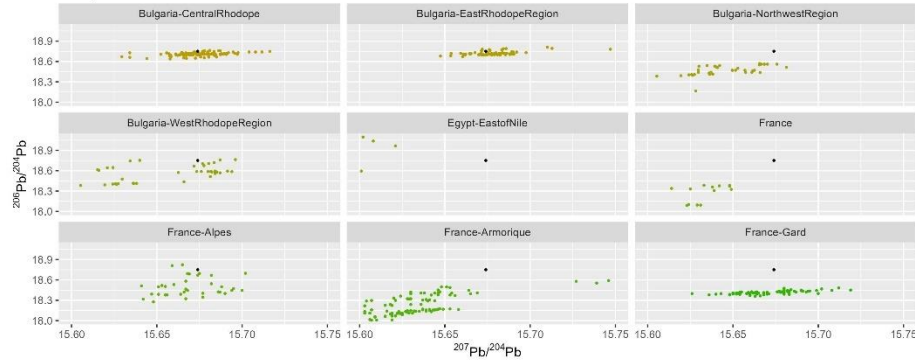

Sample MS057

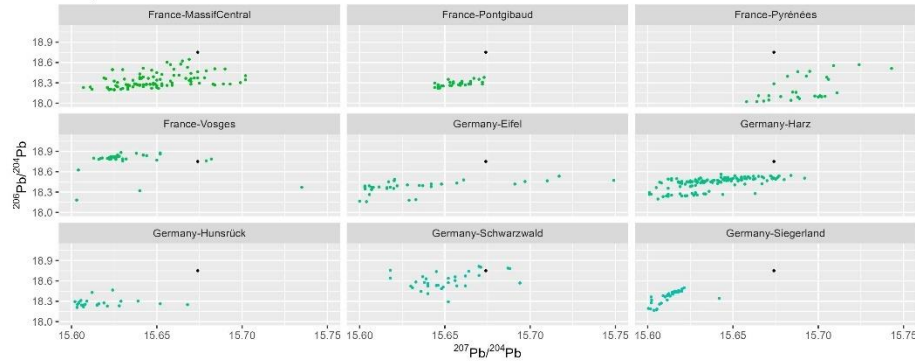

Sample MS057

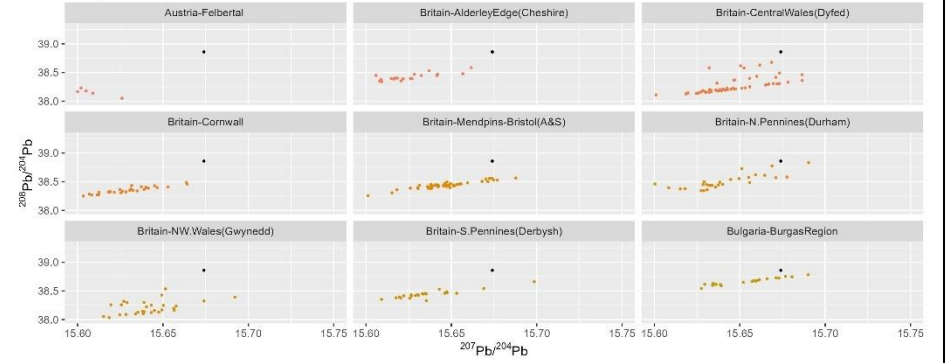

Sample MS057

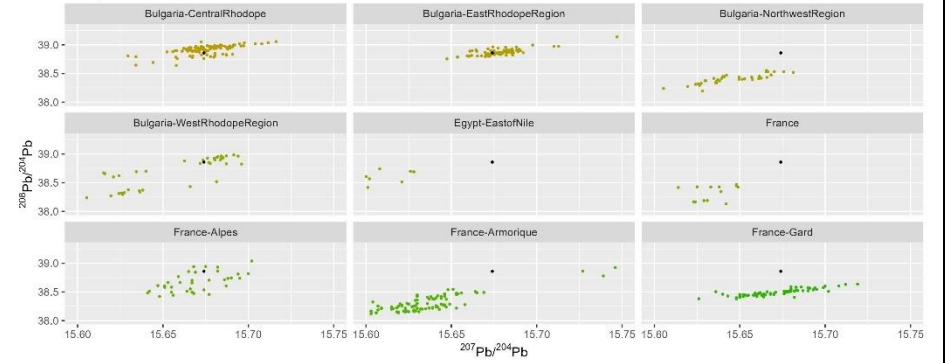

Sample MS057

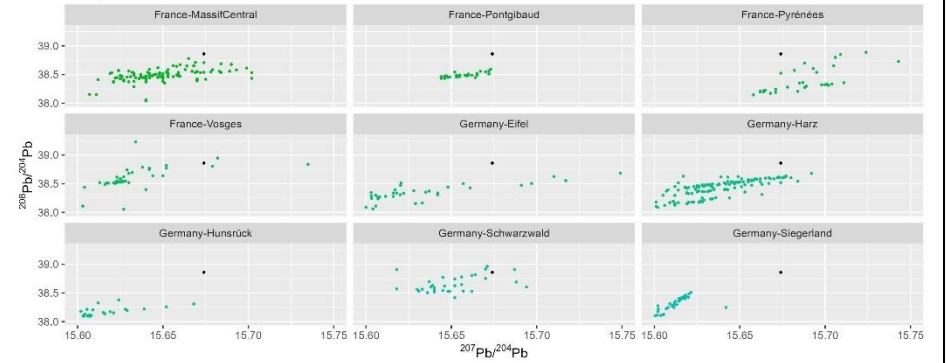

Sample MS057

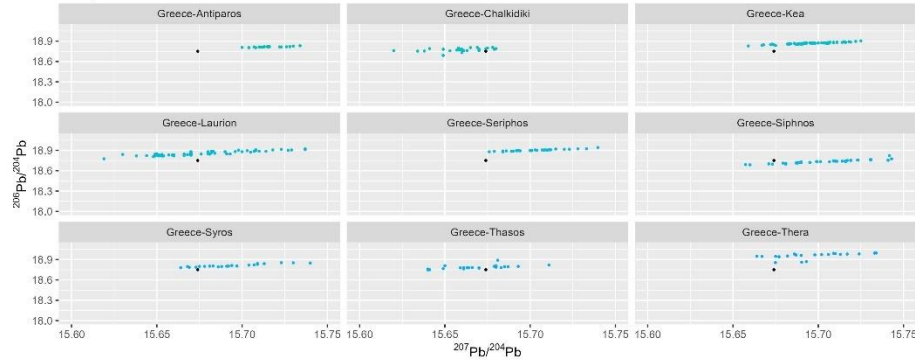

Sample MS057

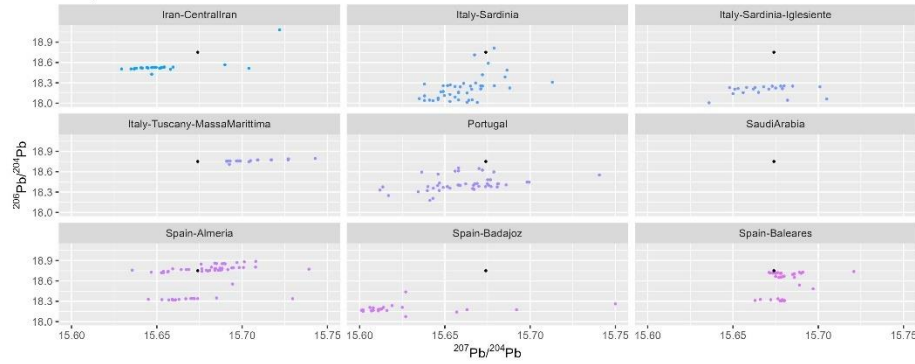

Sample MS057

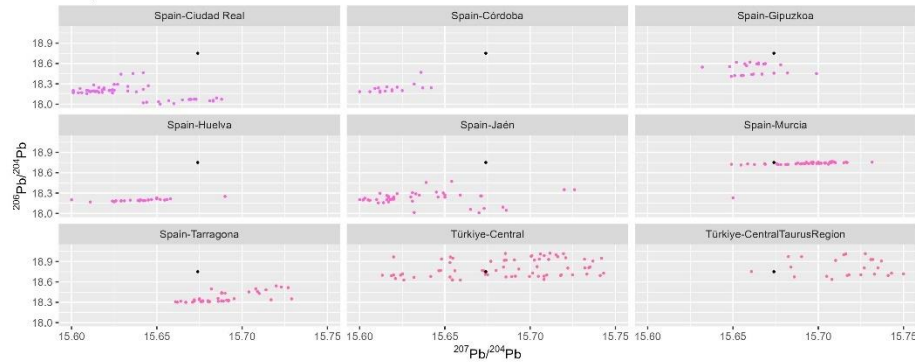

Sample MS057

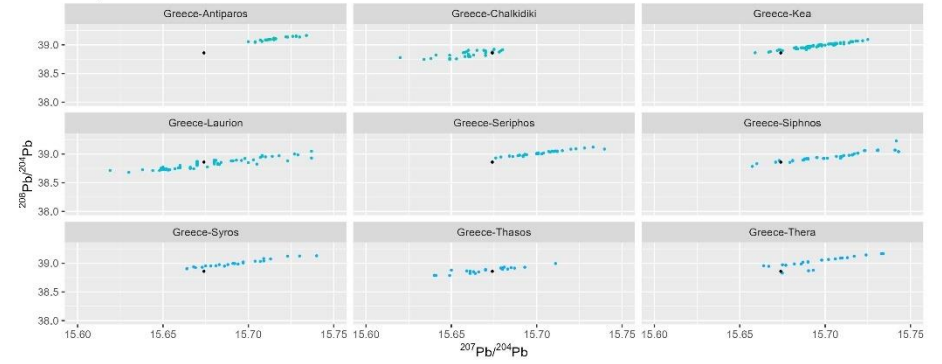

Sample MS057

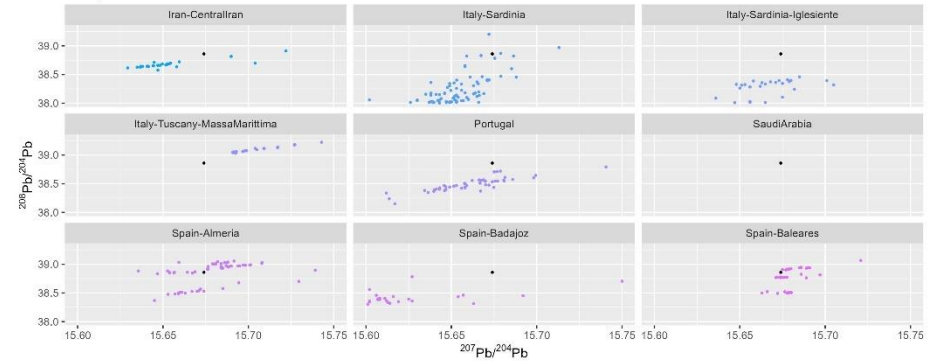

Sample MS057

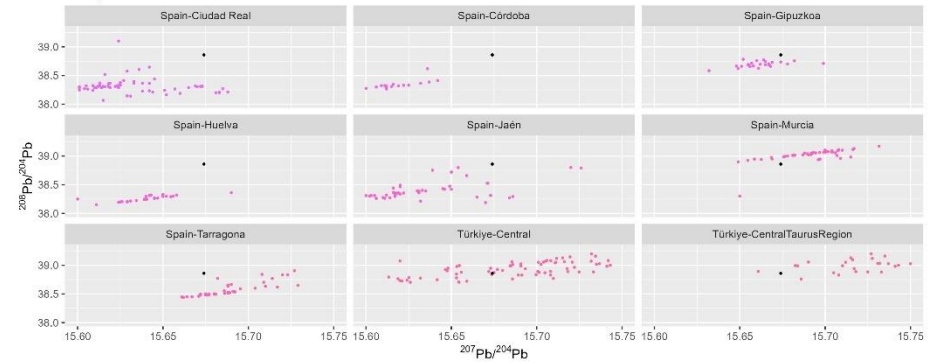

Sample MS057

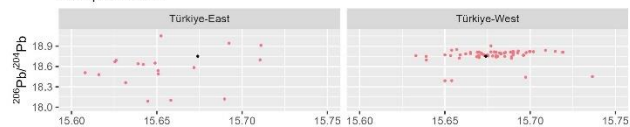

Sample MS057

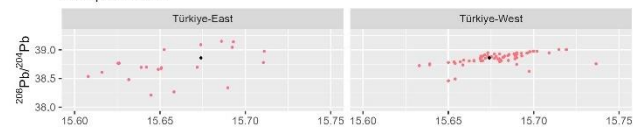

Sample MS058

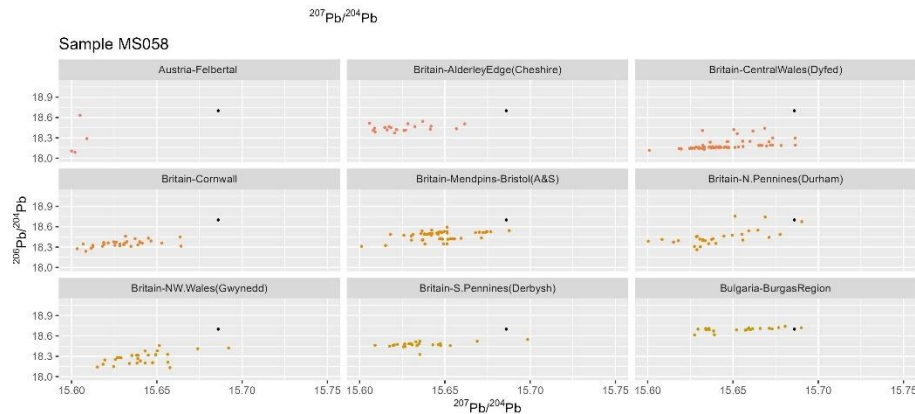

Sample MS058

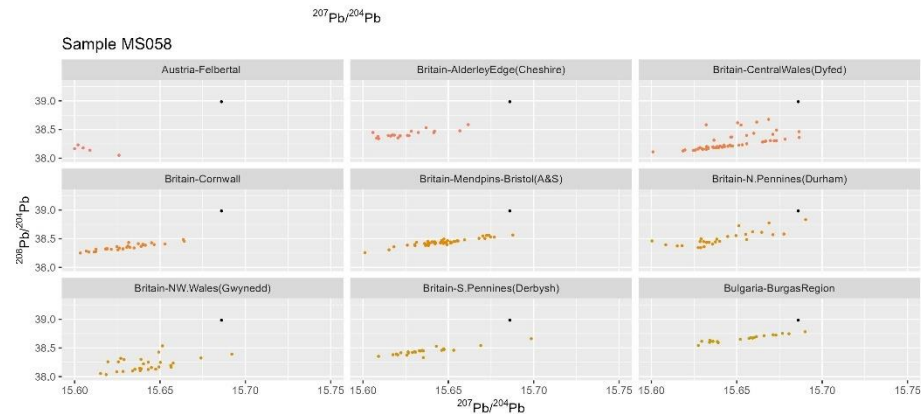

Sample MS058

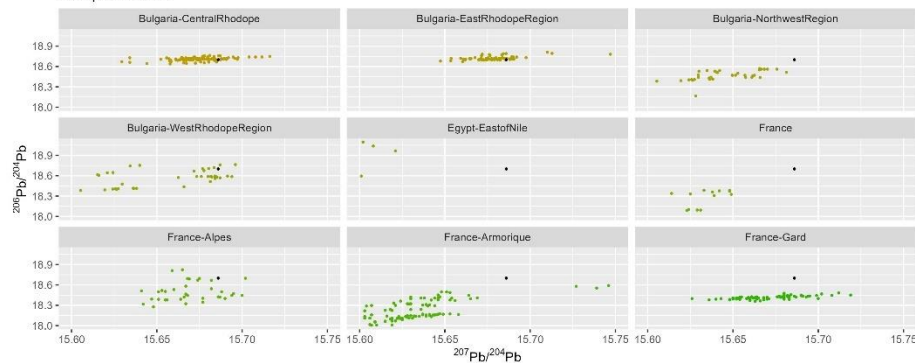

Sample MS058

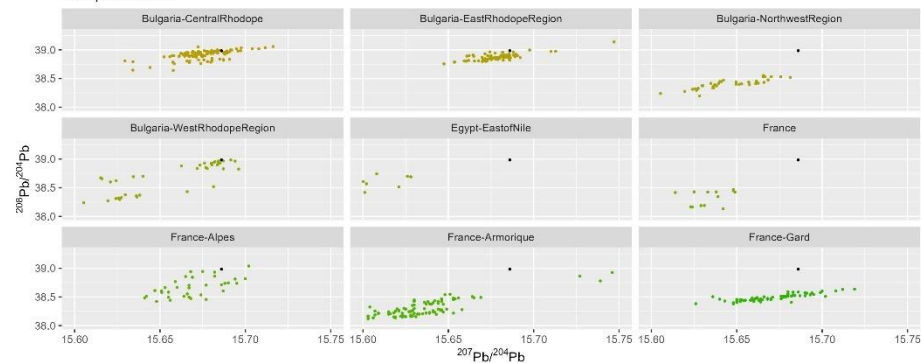

Sample MS058

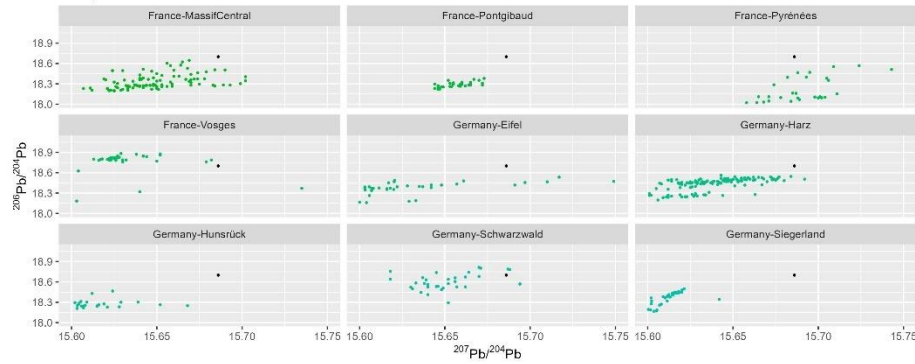

Sample MS058

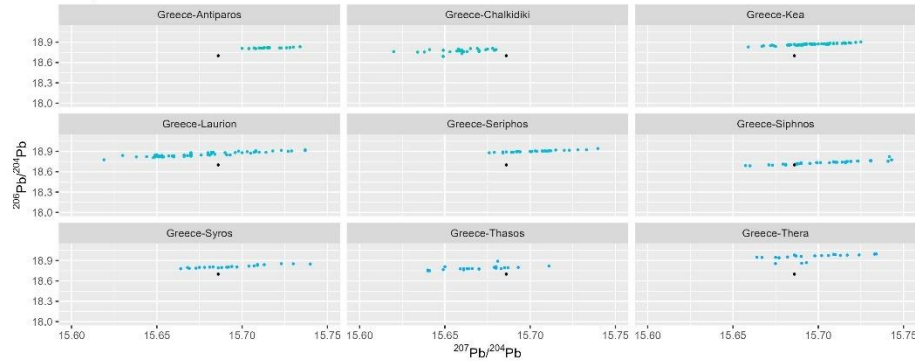

Sample MS058

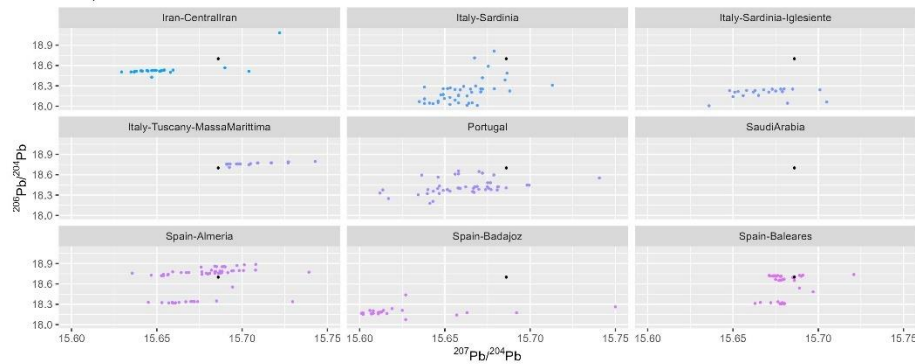

Sample MS058

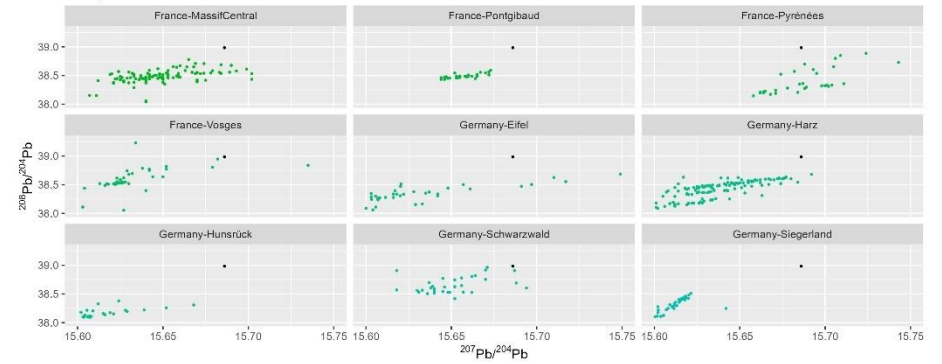

Sample MS058

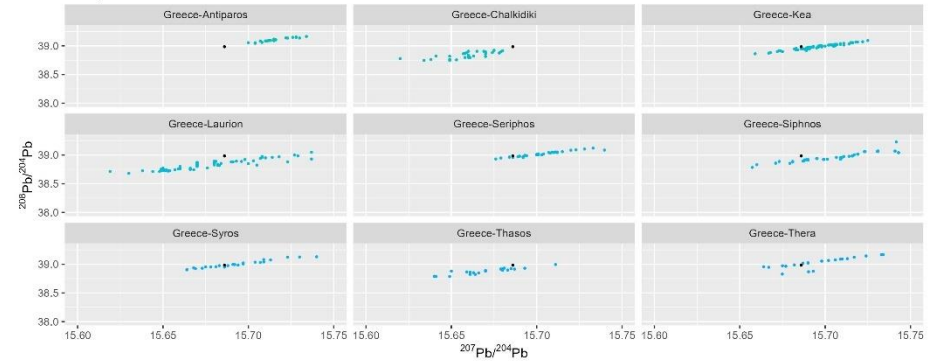

Sample MS058

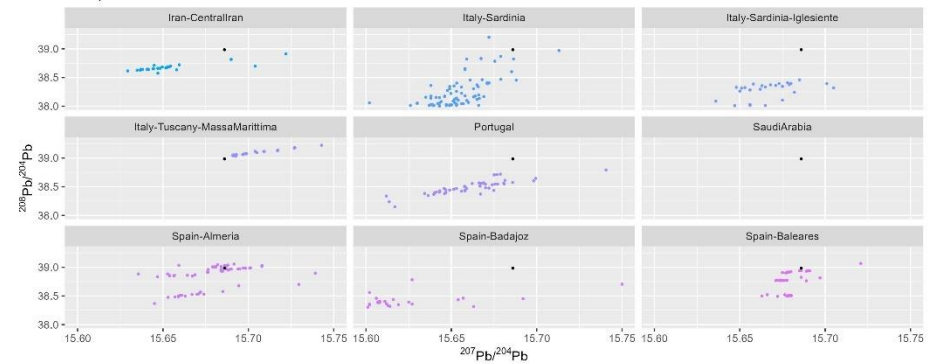



Sample MS058

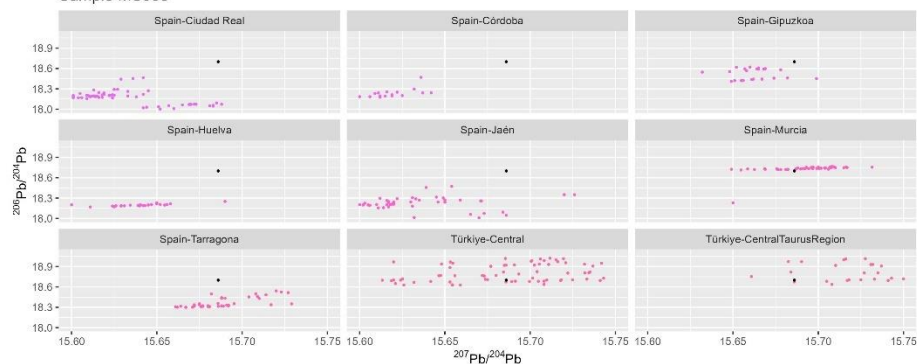

Sample MS058

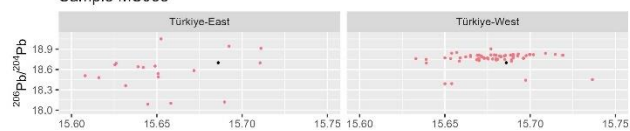 $^{207}\text{Pb}/^{204}\text{Pb}$ 

Sample MS059

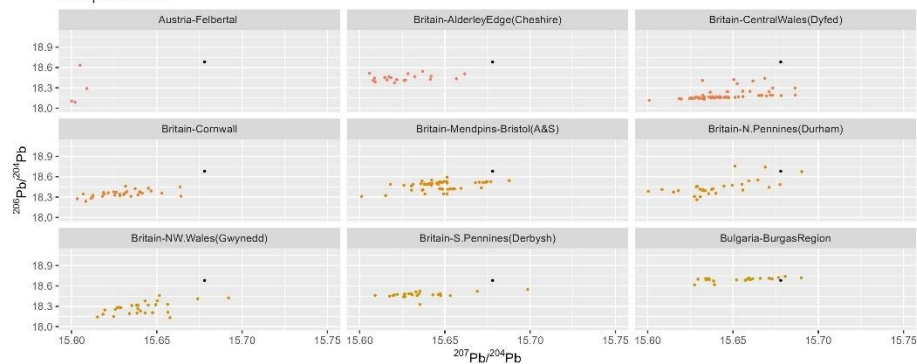

Sample MS058

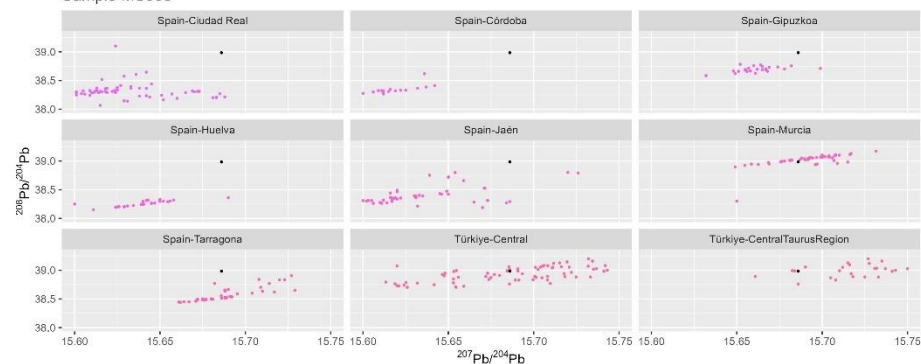

Sample MS058

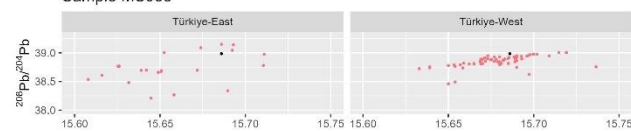 $^{207}\text{Pb}/^{204}\text{Pb}$ 

Sample MS059

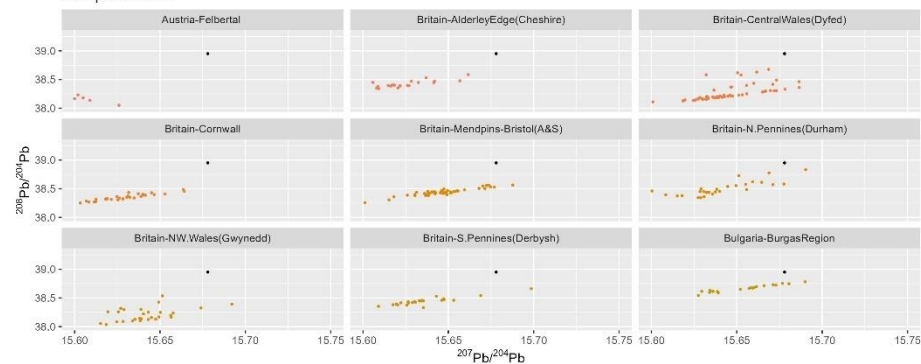



Sample MS059

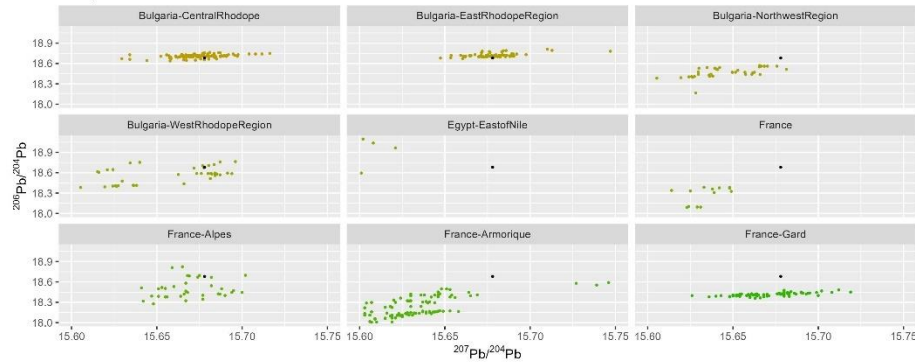

Sample MS059

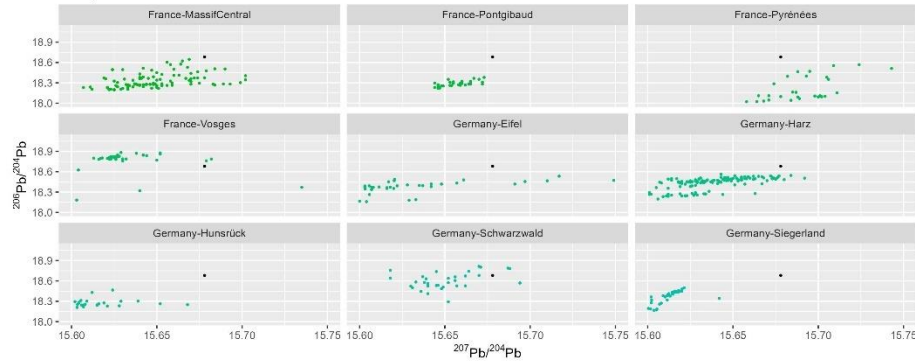

Sample MS059

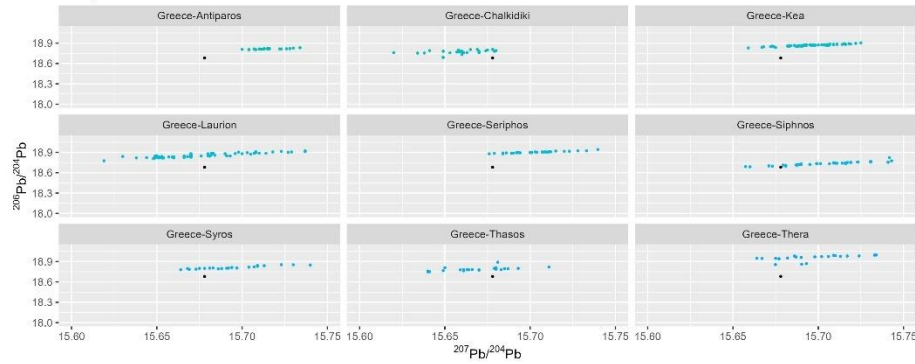

Sample MS059

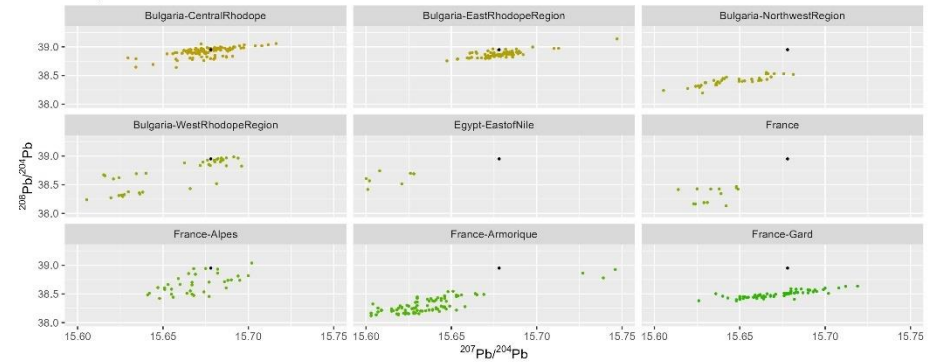

Sample MS059

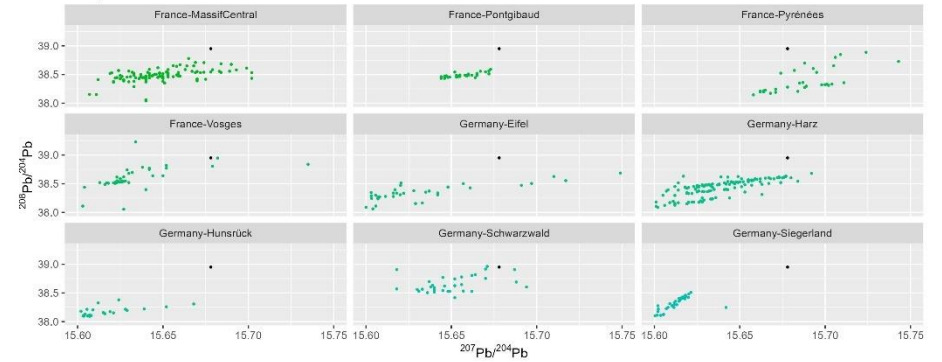

Sample MS059

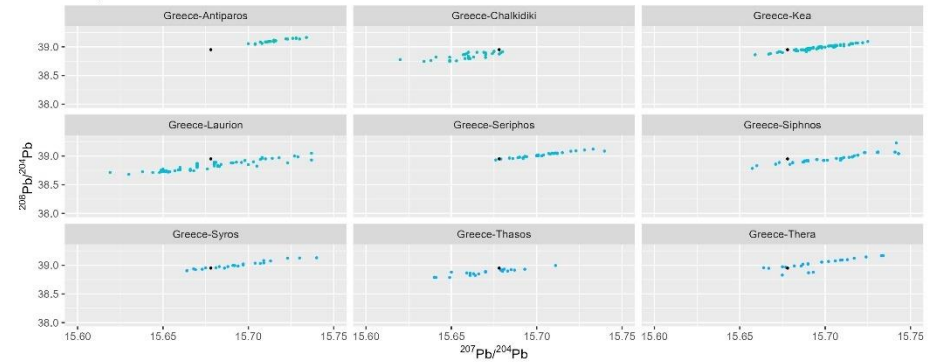

Sample MS059

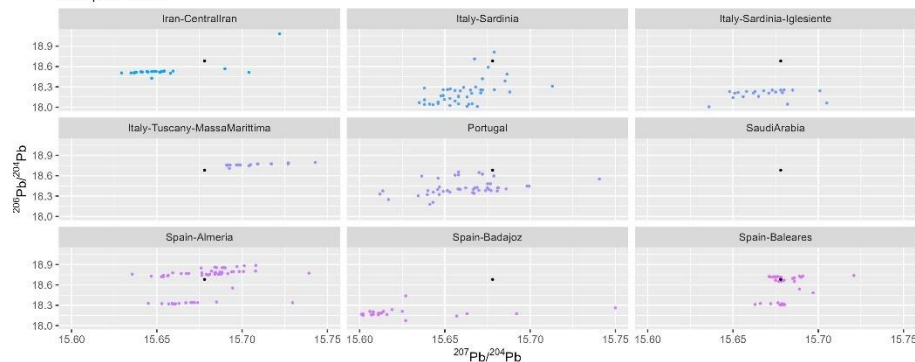

Sample MS059

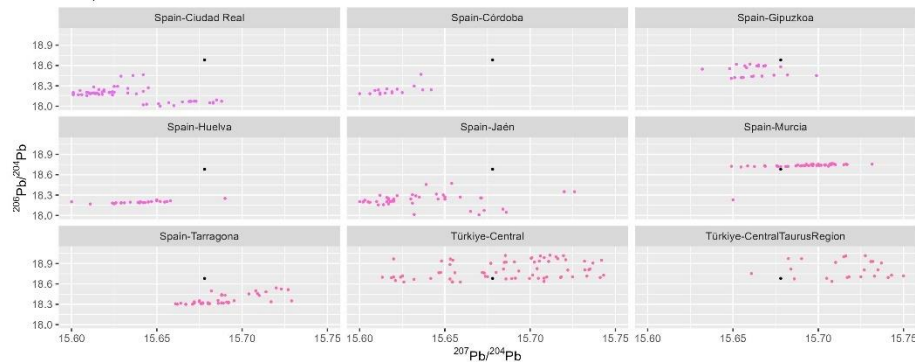

Sample MS059

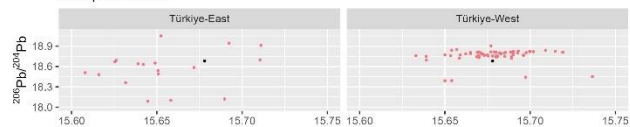

$^{207}\text{Pb}/^{204}\text{Pb}$

Sample MS059

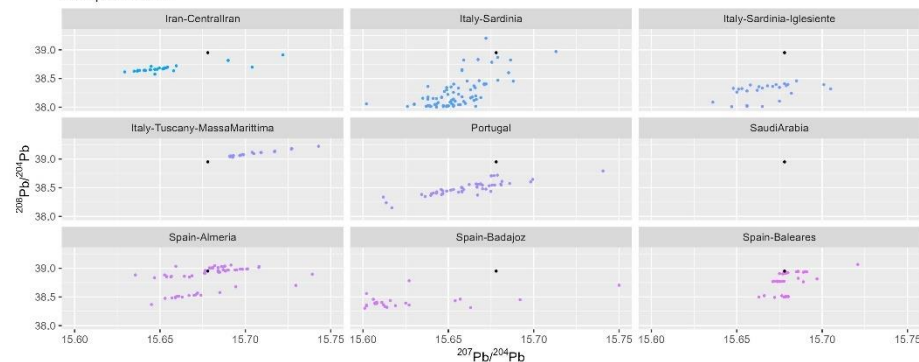

Sample MS059

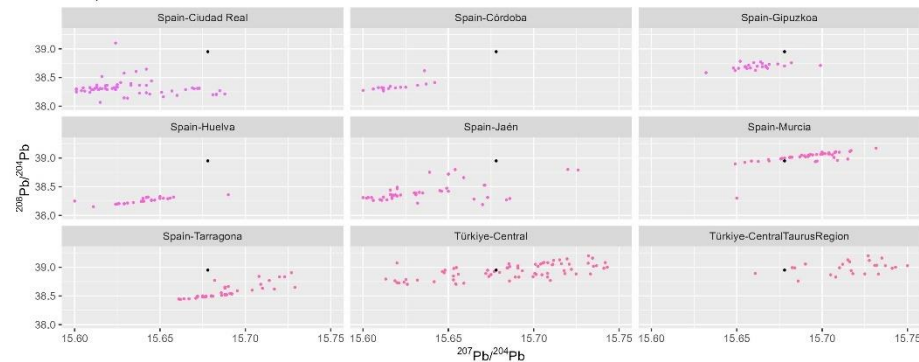

Sample MS059

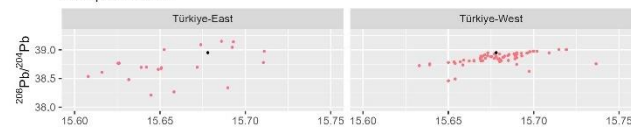

$^{207}\text{Pb}/^{204}\text{Pb}$

Sample MS060

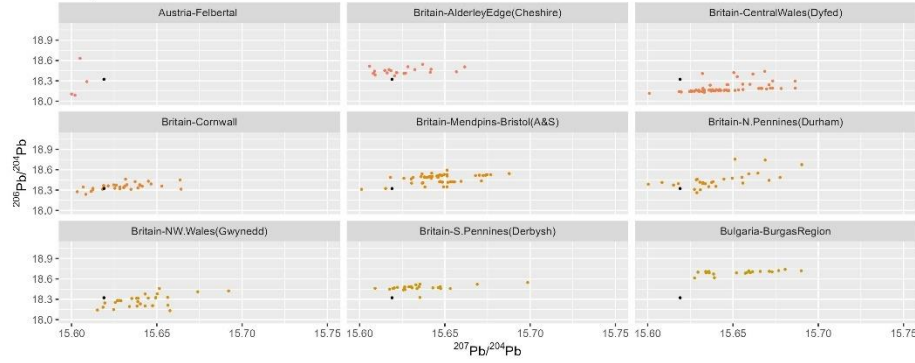

Sample MS060

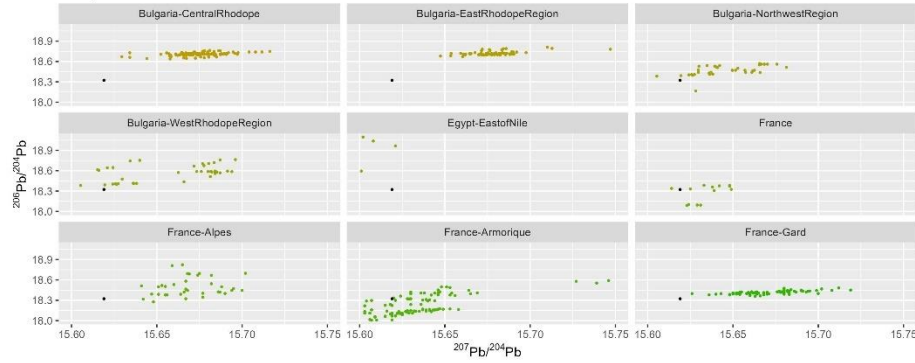

Sample MS060

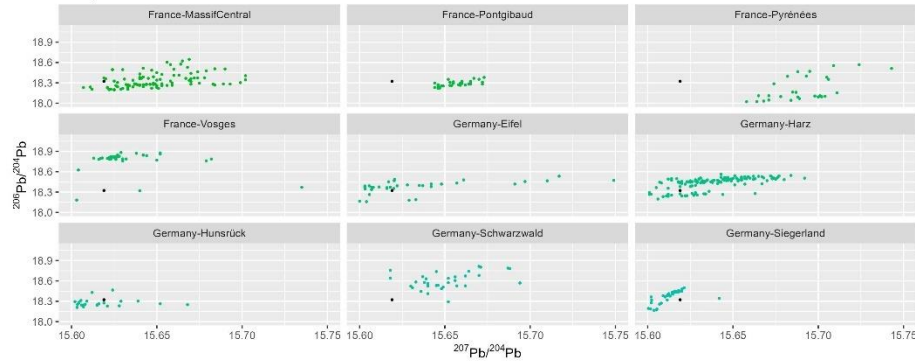

Sample MS060

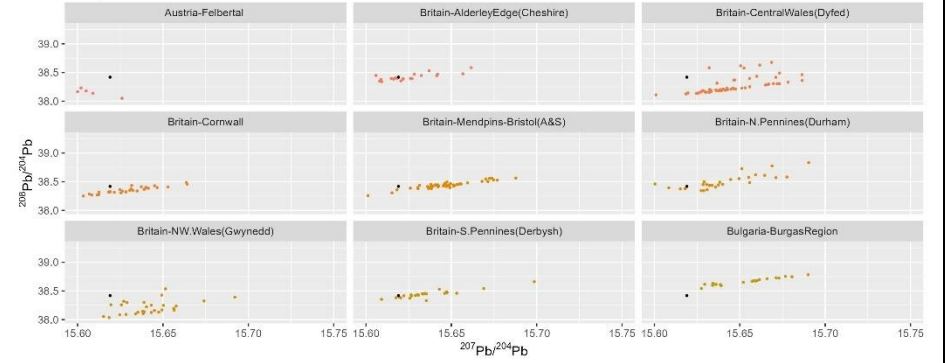

Sample MS060

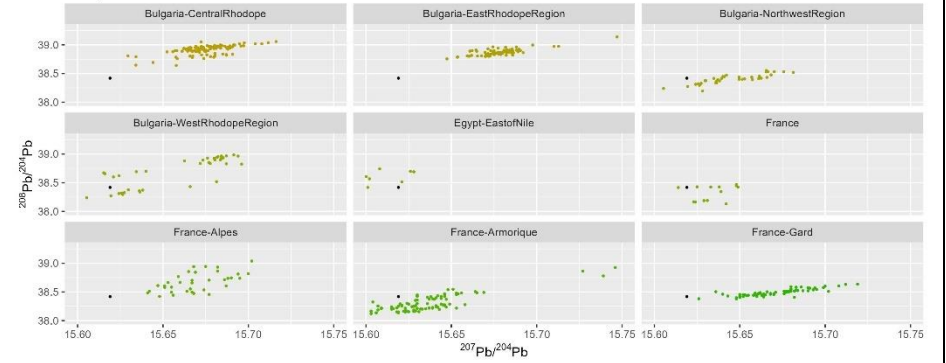

Sample MS060

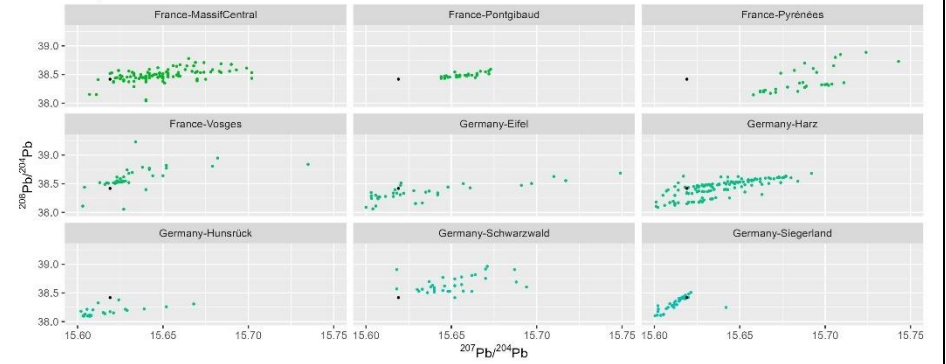

Sample MS060

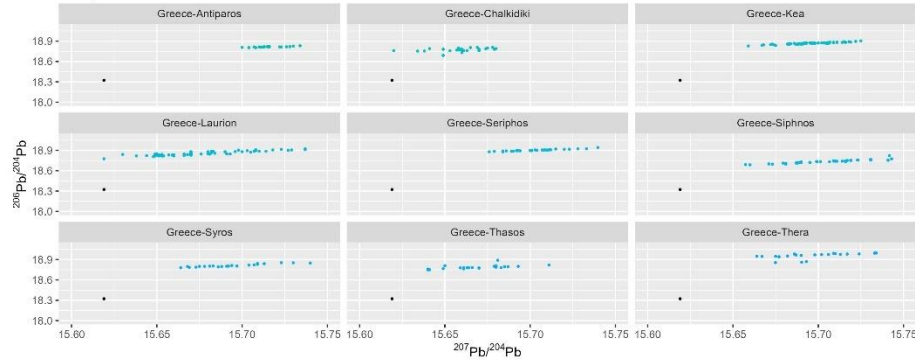

Sample MS060

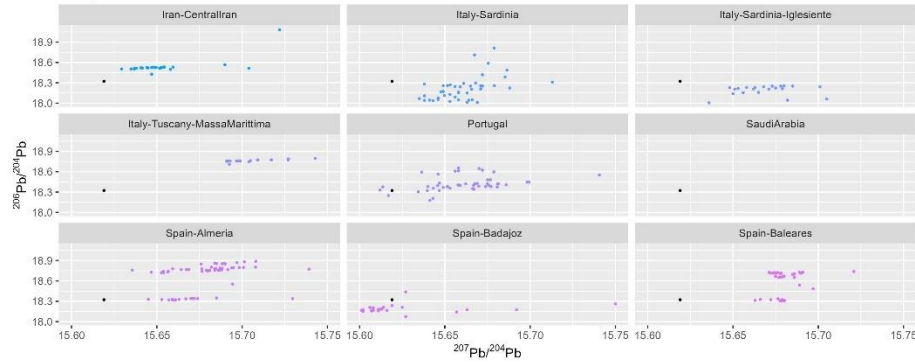

Sample MS060

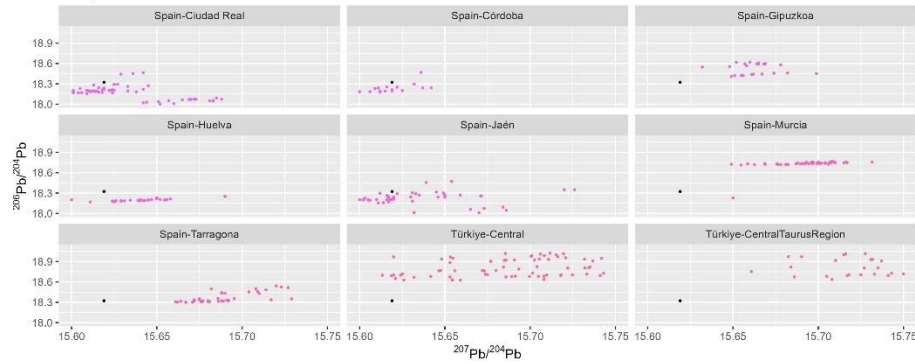

Sample MS060

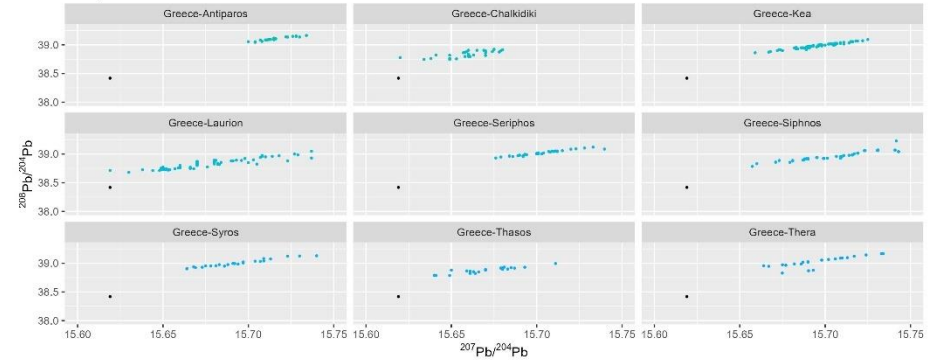

Sample MS060

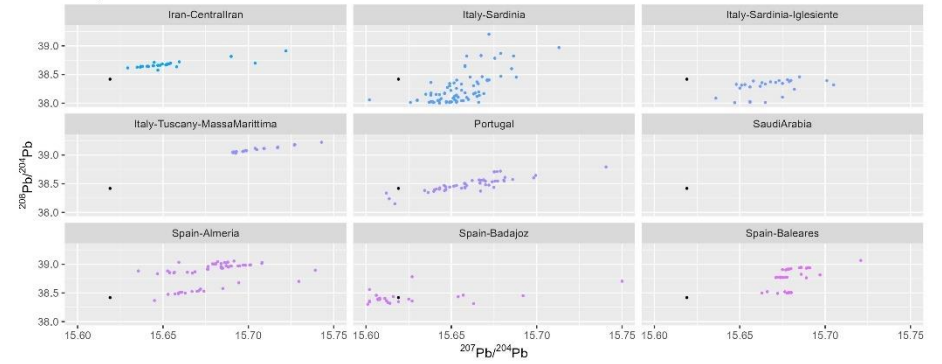

Sample MS060

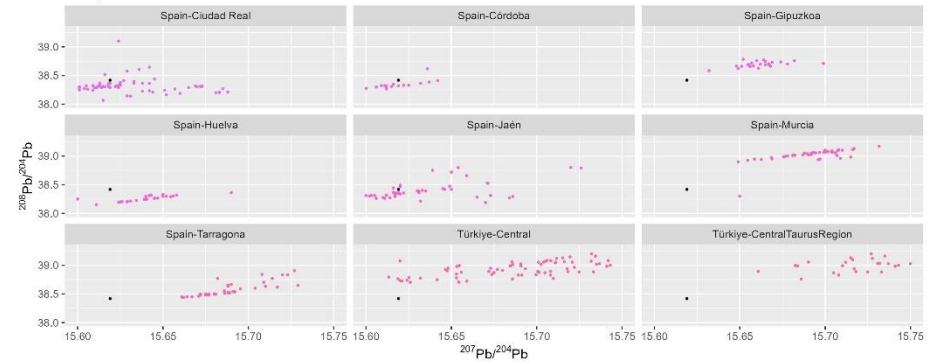



Sample MS060

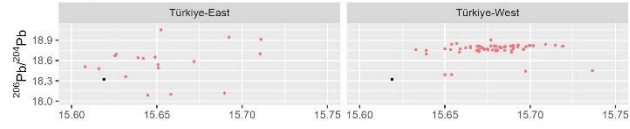 $^{207}\text{Pb}/^{204}\text{Pb}$ 

Sample MS061

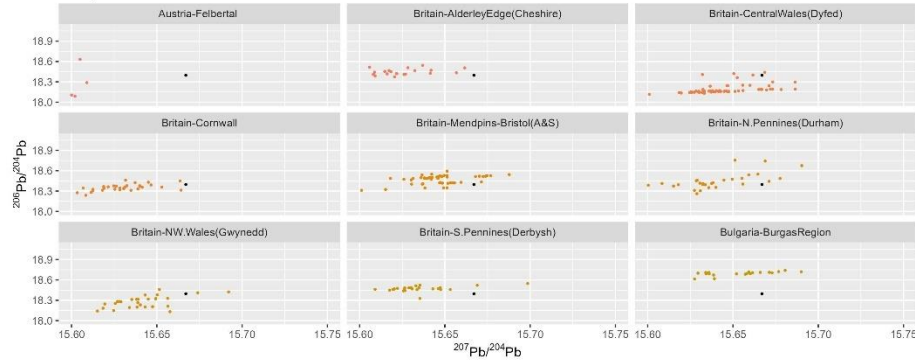 $^{207}\text{Pb}/^{204}\text{Pb}$ 

Sample MS061

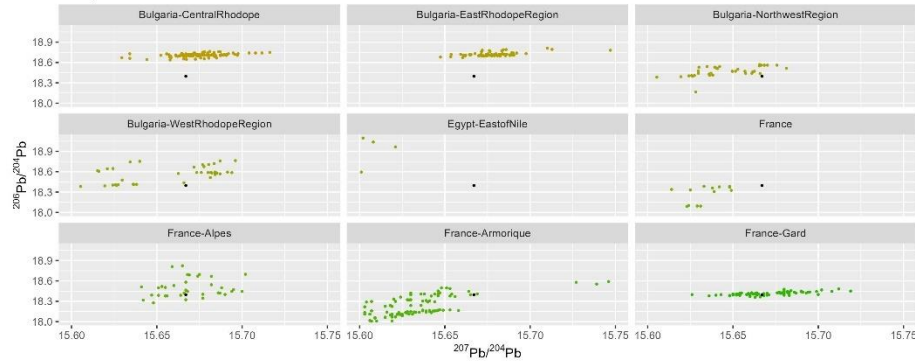 $^{207}\text{Pb}/^{204}\text{Pb}$ 

Sample MS060

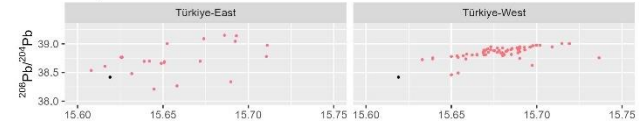 $^{207}\text{Pb}/^{204}\text{Pb}$ 

Sample MS061

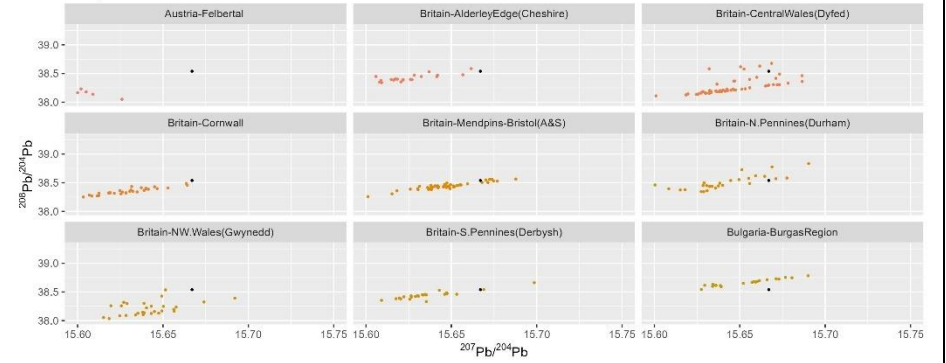 $^{207}\text{Pb}/^{204}\text{Pb}$ 

Sample MS061

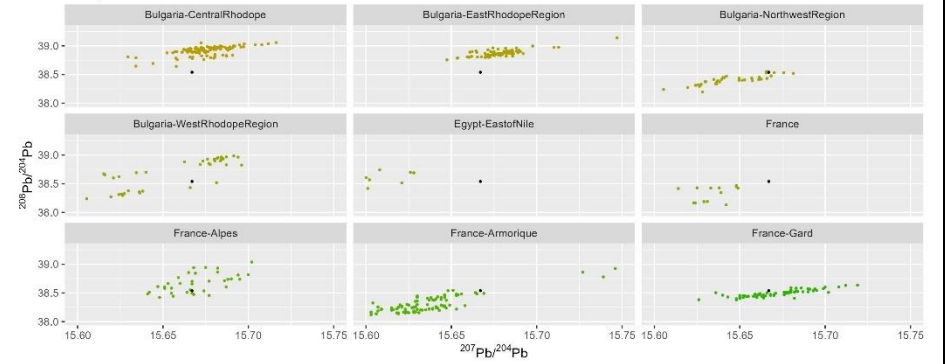 $^{207}\text{Pb}/^{204}\text{Pb}$



Sample MS061

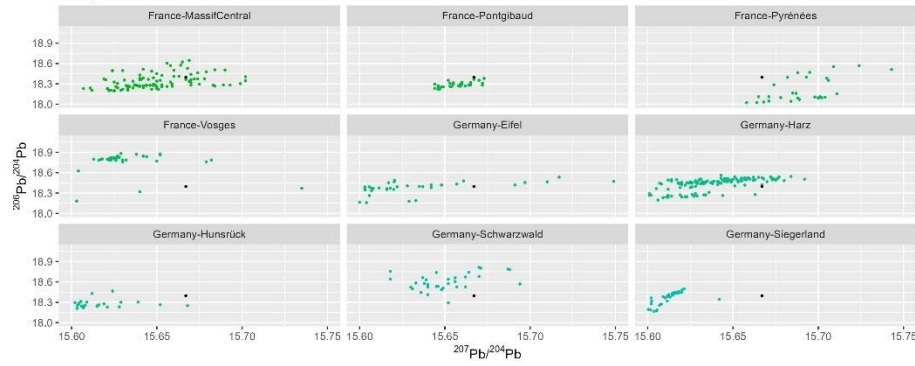

Sample MS061

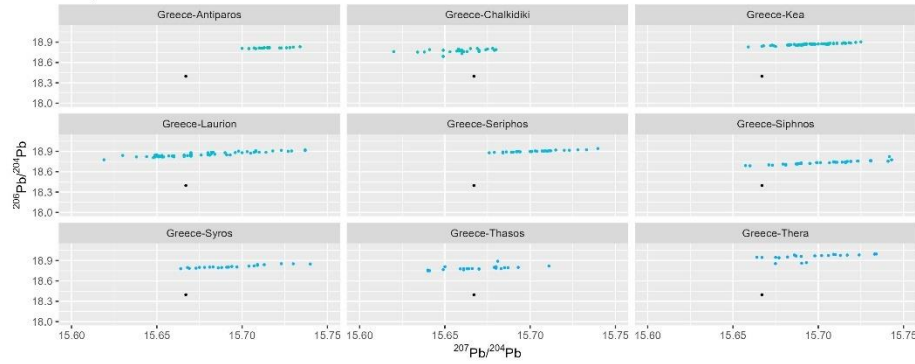

Sample MS061

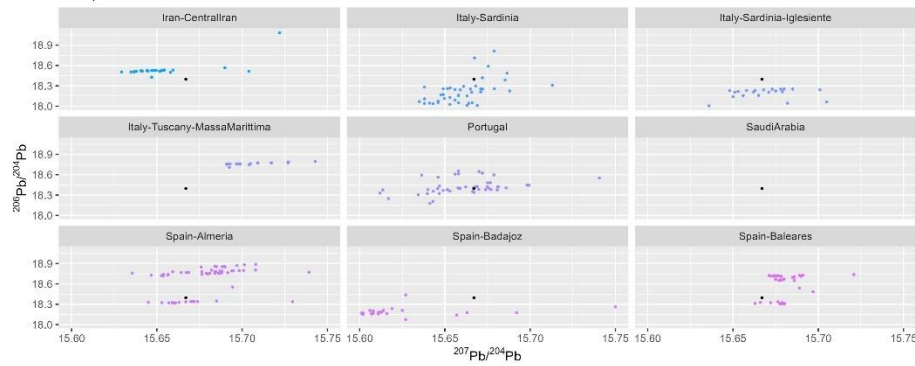

Sample MS061

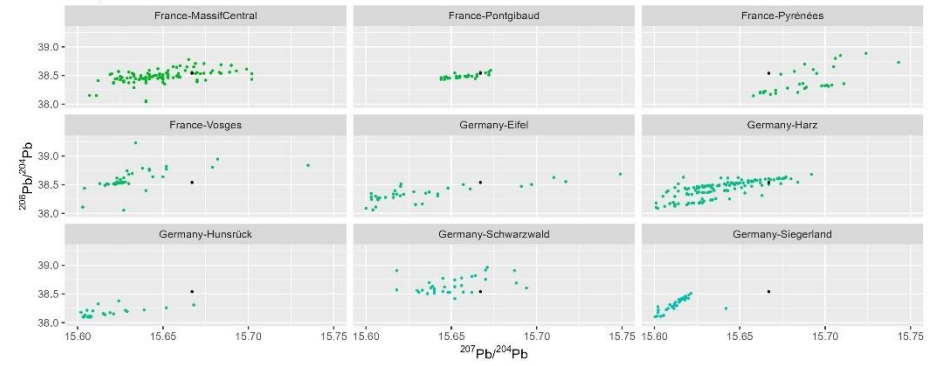

Sample MS061

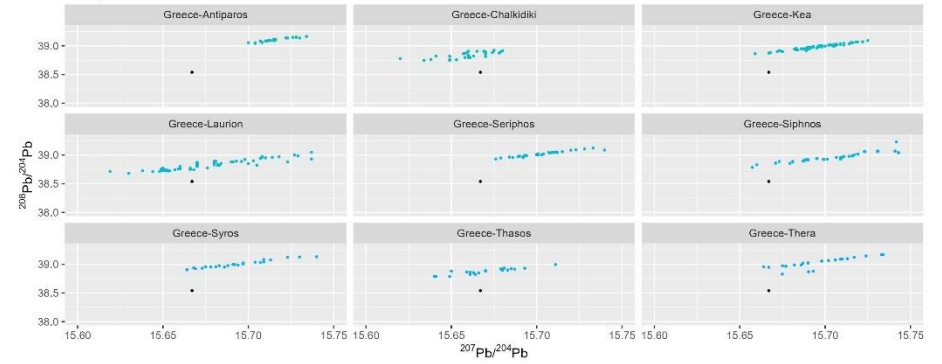

Sample MS061

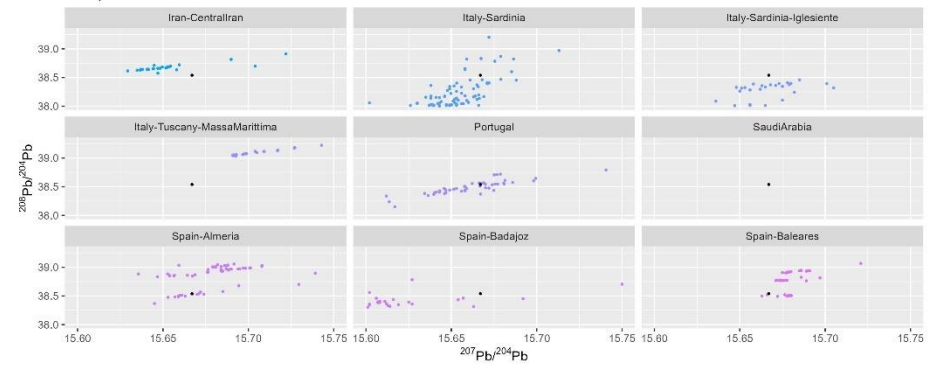

Sample MS061

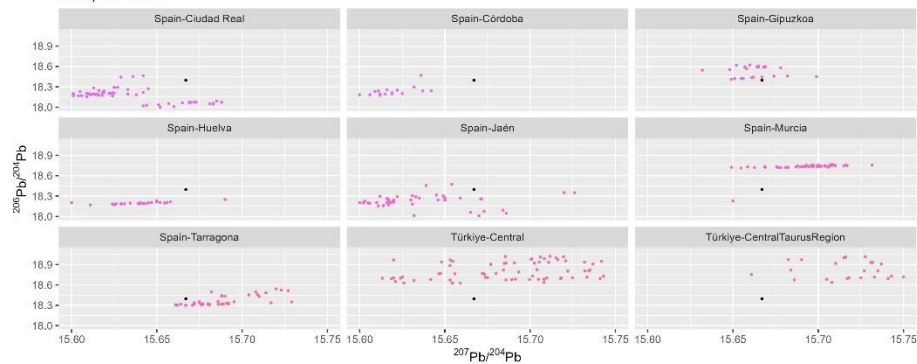

Sample MS061

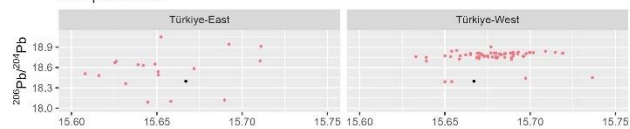

$^{207}\text{Pb}/^{204}\text{Pb}$

Sample MS062

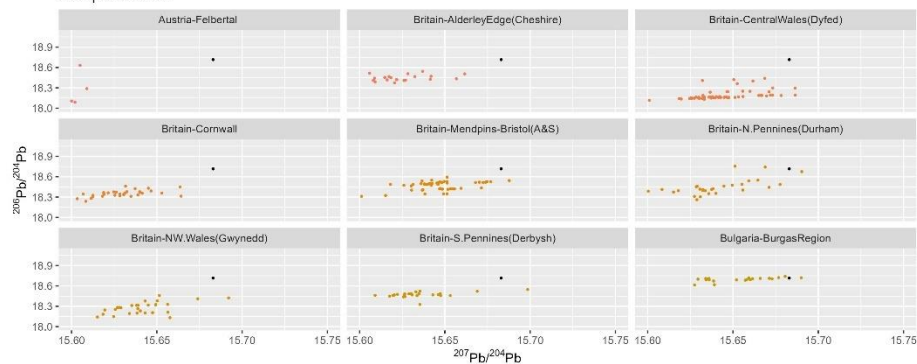

Sample MS061

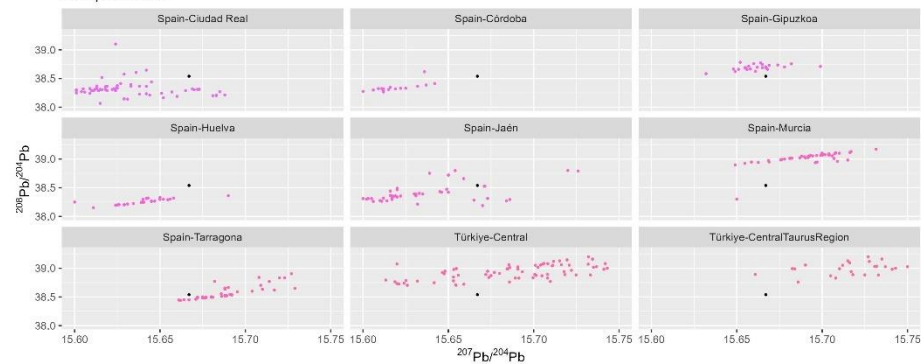

Sample MS061

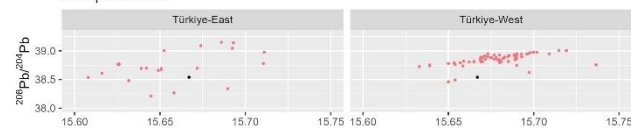

$^{207}\text{Pb}/^{204}\text{Pb}$

Sample MS062

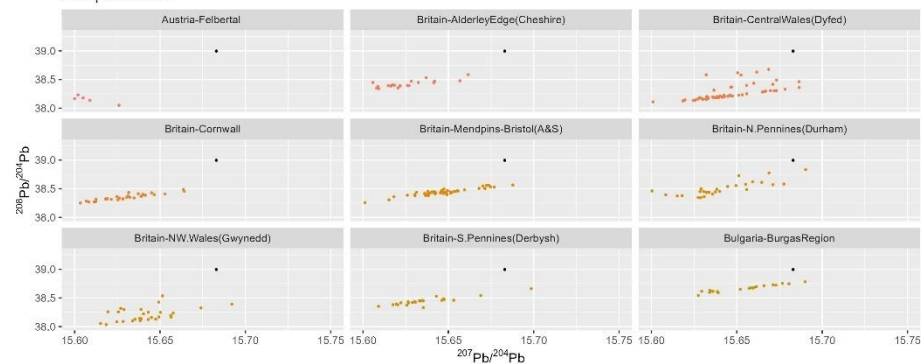

Sample MS062

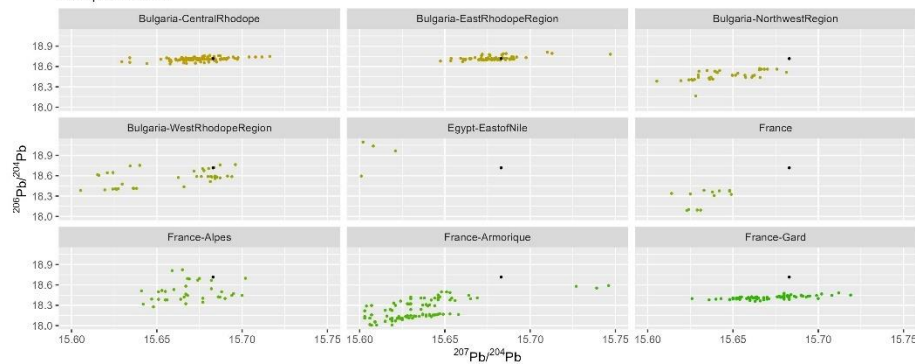

Sample MS062

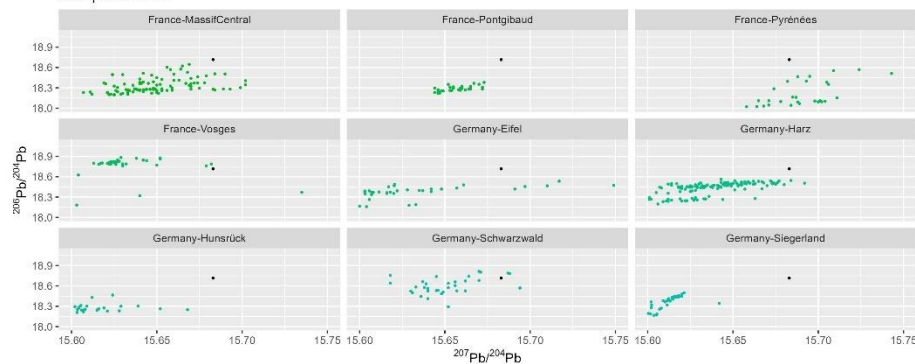

Sample MS062

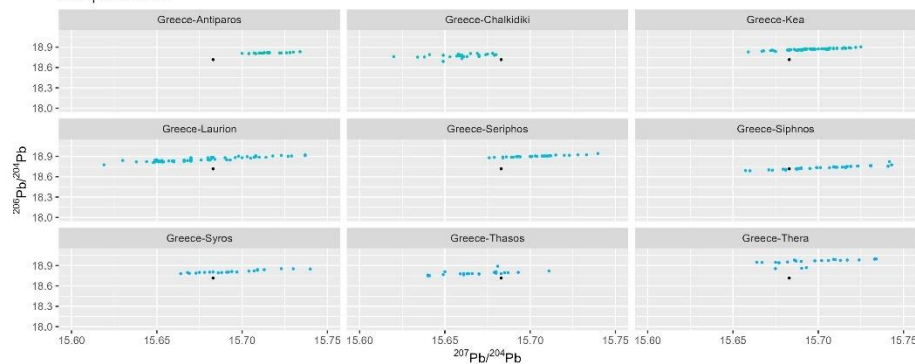

Sample MS062

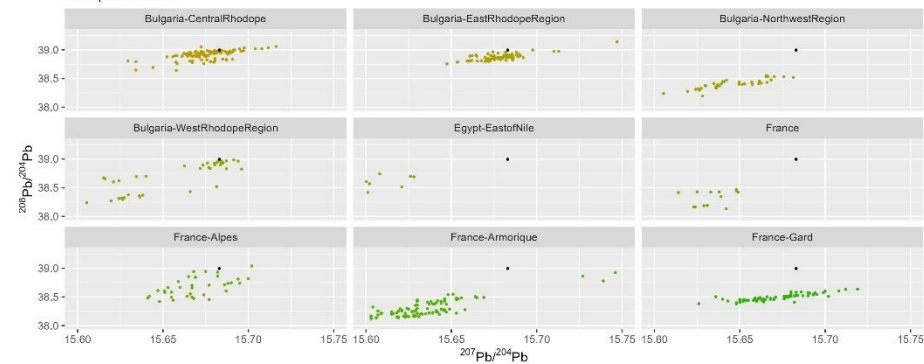

Sample MS062

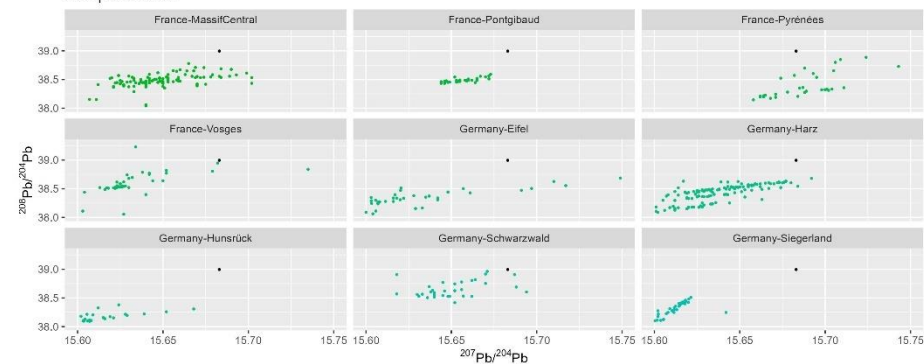

Sample MS062

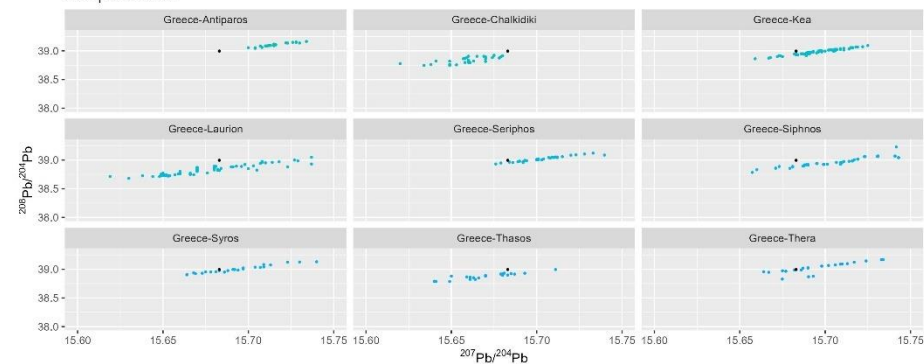

Sample MS062

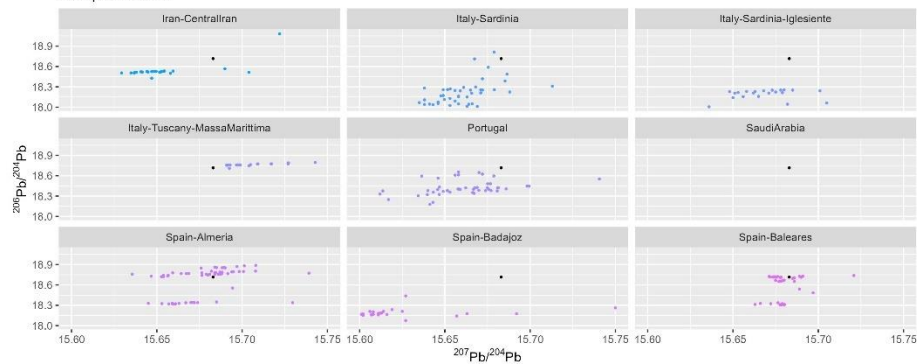

Sample MS062

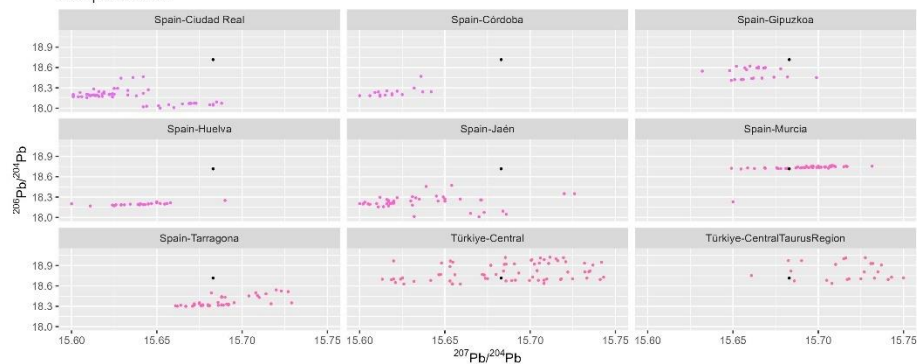

Sample MS062

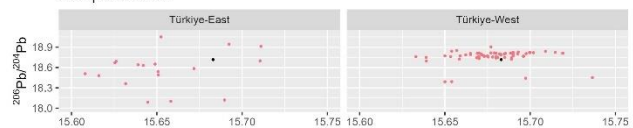

$^{207}\text{Pb}/^{204}\text{Pb}$

Sample MS062

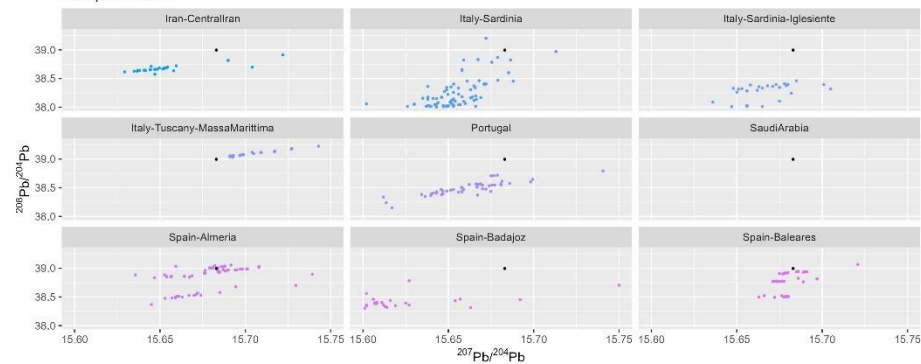

Sample MS062

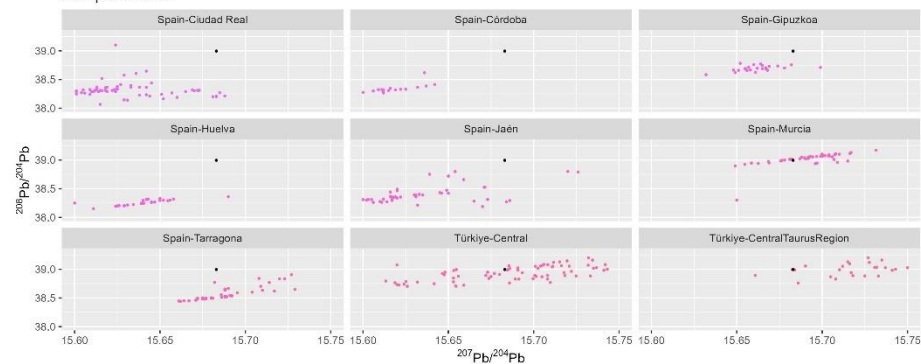

Sample MS062

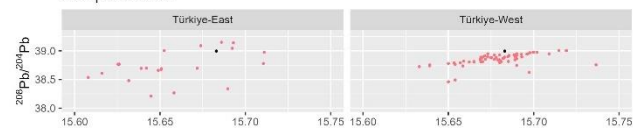

$^{207}\text{Pb}/^{204}\text{Pb}$



Sample MS063

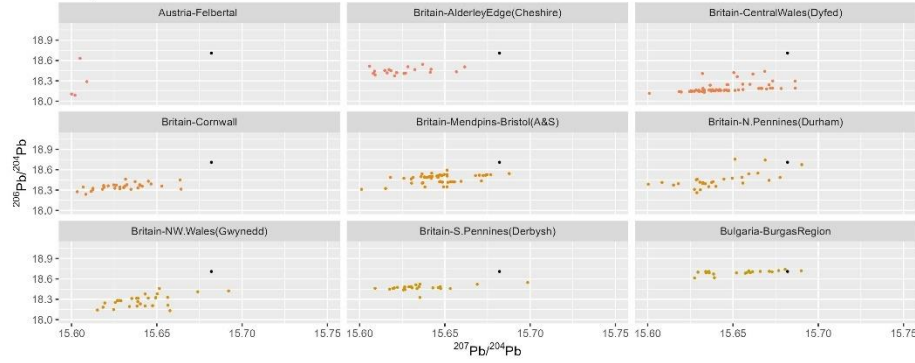

Sample MS063

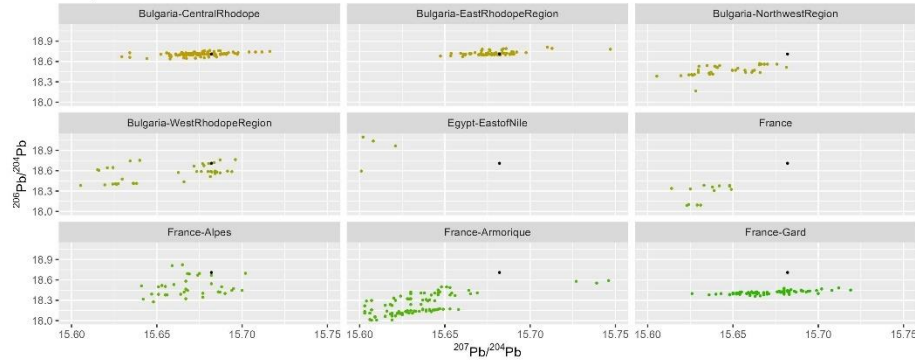

Sample MS063

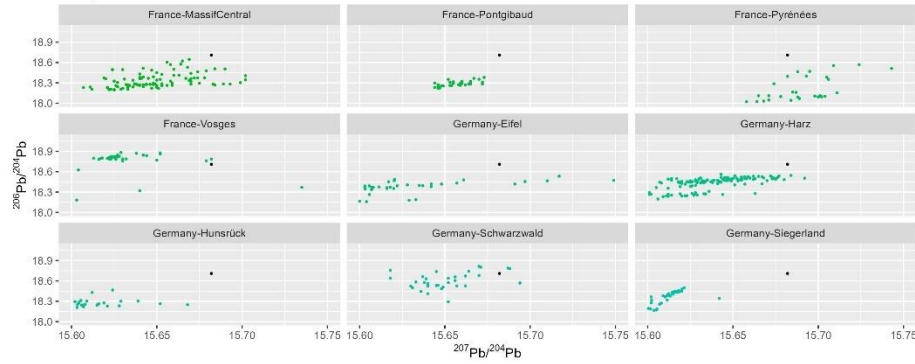

Sample MS063

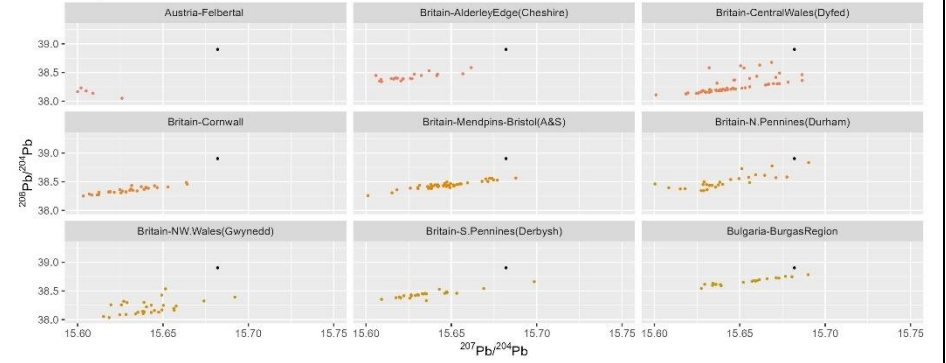

Sample MS063

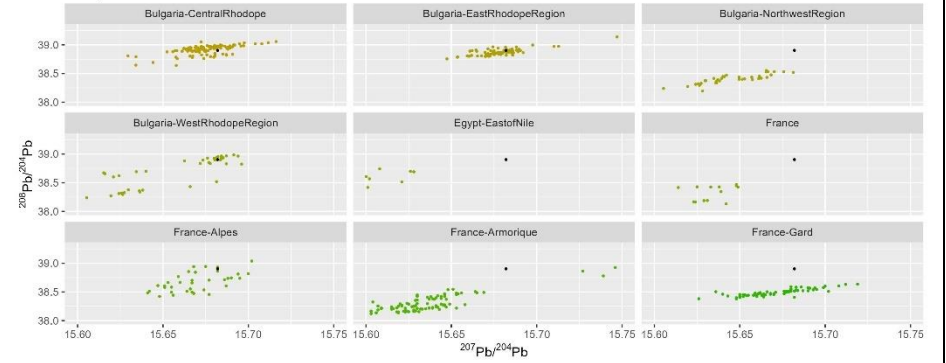

Sample MS063

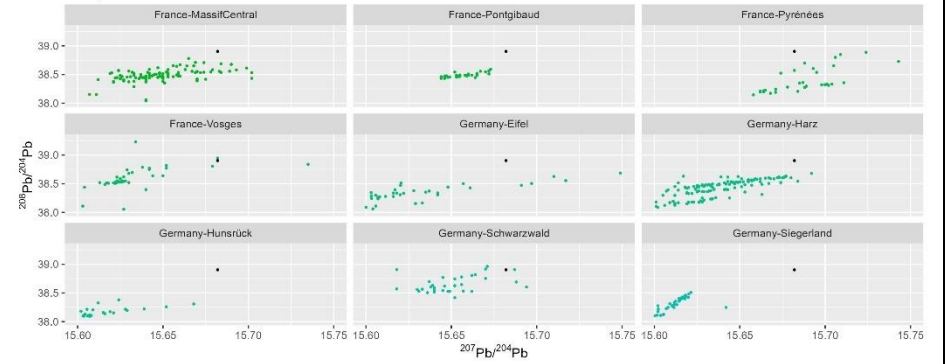



Sample MS063

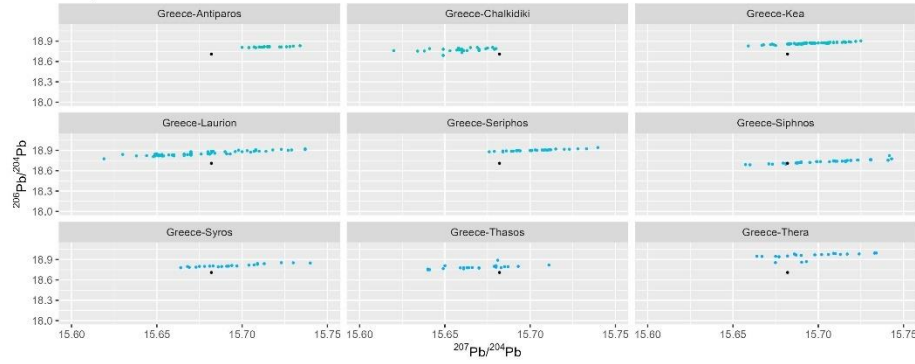

Sample MS063

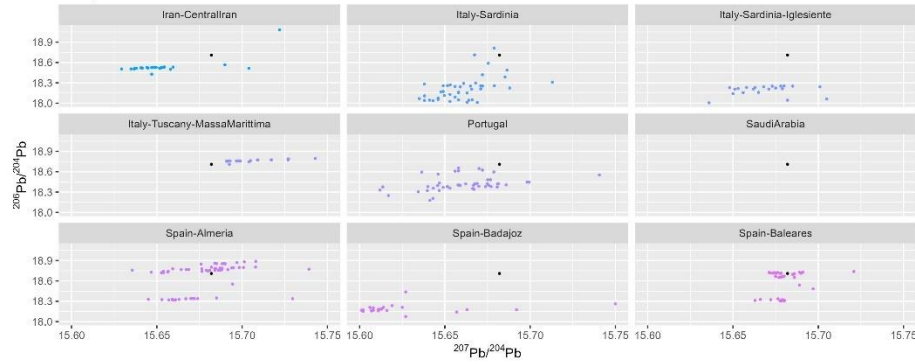

Sample MS063

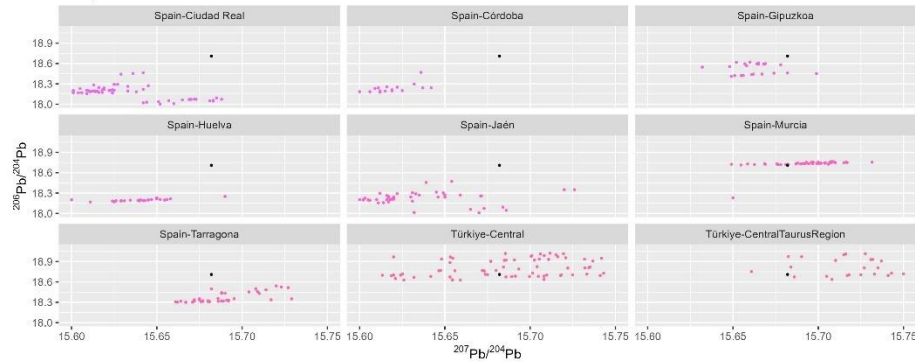

Sample MS063

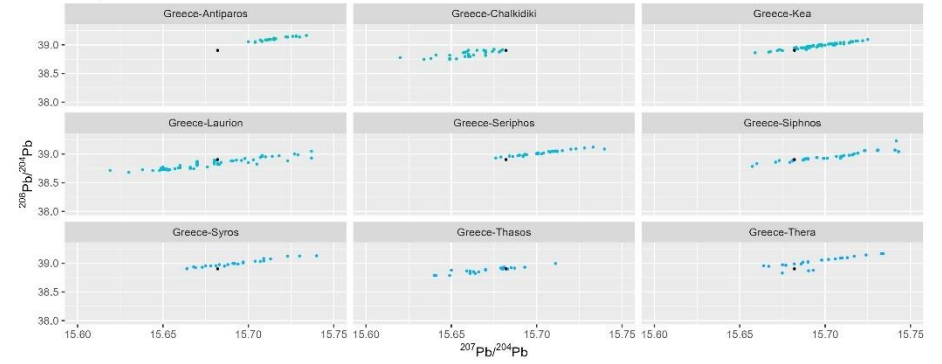

Sample MS063

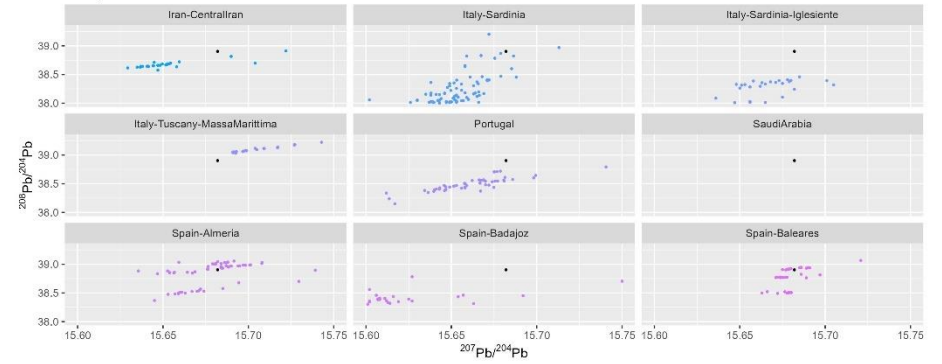

Sample MS063

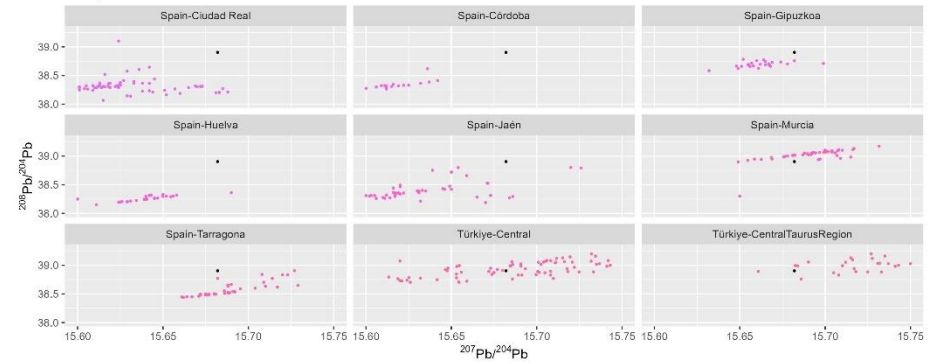

Sample MS063

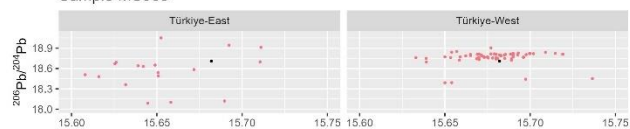 $^{207}\text{Pb}/^{204}\text{Pb}$ 

Sample R82

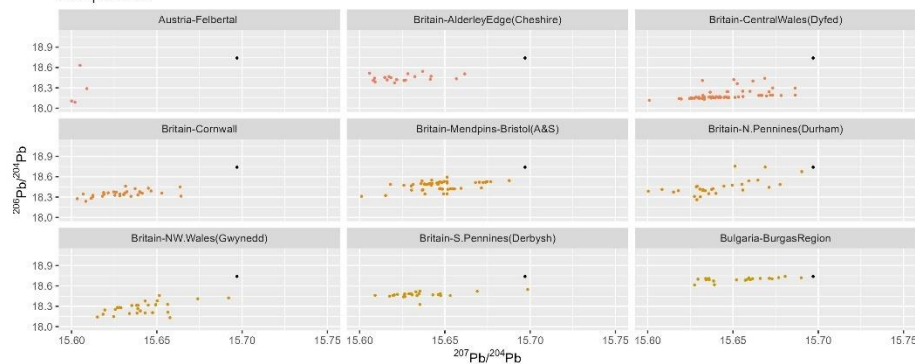 $^{207}\text{Pb}/^{204}\text{Pb}$ 

Sample R82

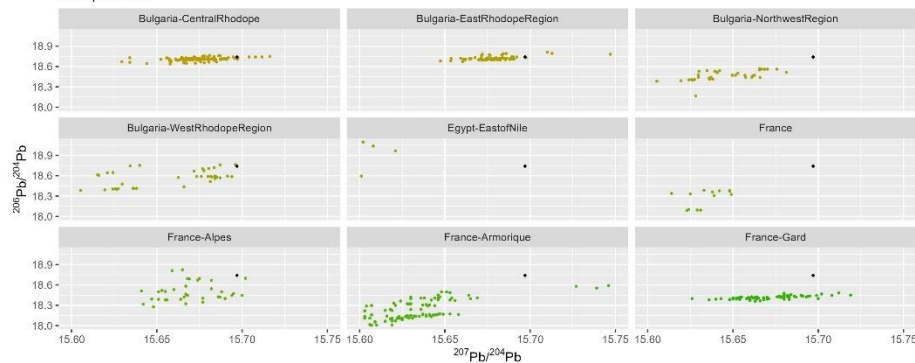 $^{207}\text{Pb}/^{204}\text{Pb}$ 

Sample MS063

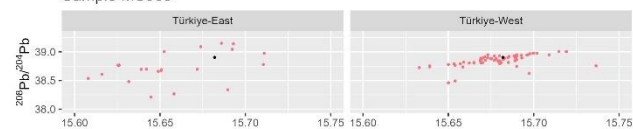 $^{207}\text{Pb}/^{204}\text{Pb}$ 

Sample R82

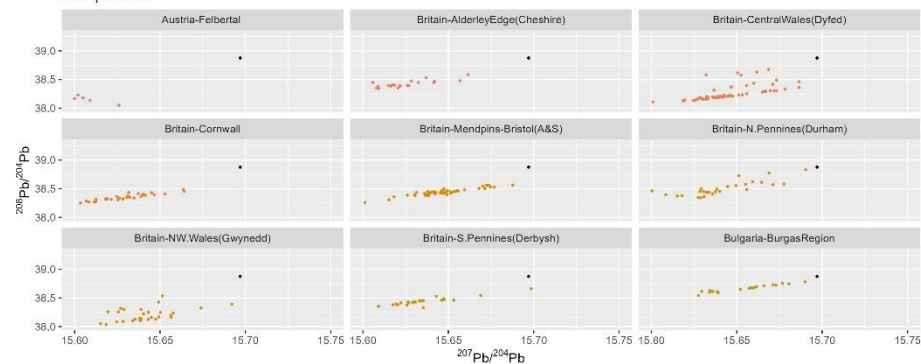 $^{207}\text{Pb}/^{204}\text{Pb}$ 

Sample R82

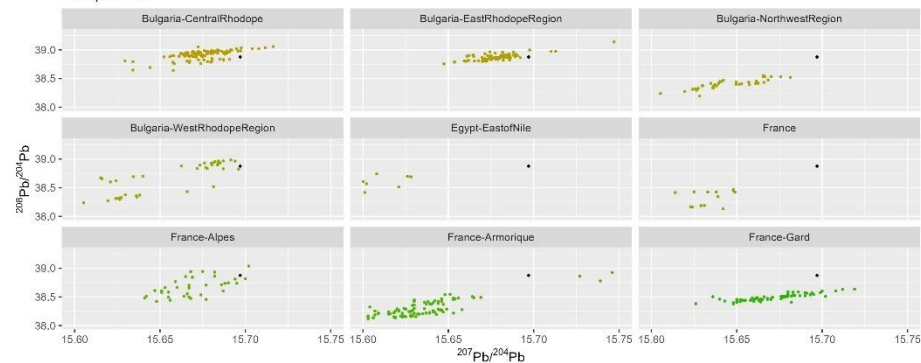 $^{207}\text{Pb}/^{204}\text{Pb}$

Sample R82

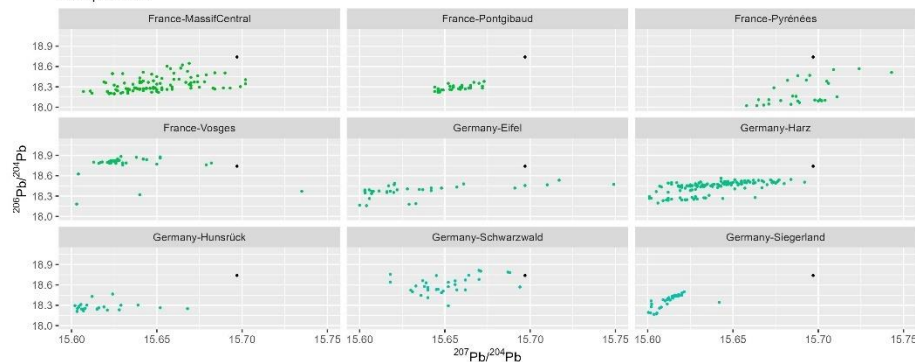

Sample R82

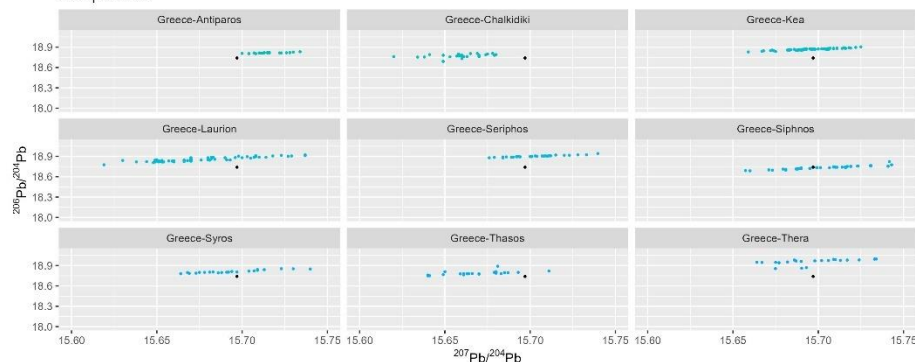

Sample R82

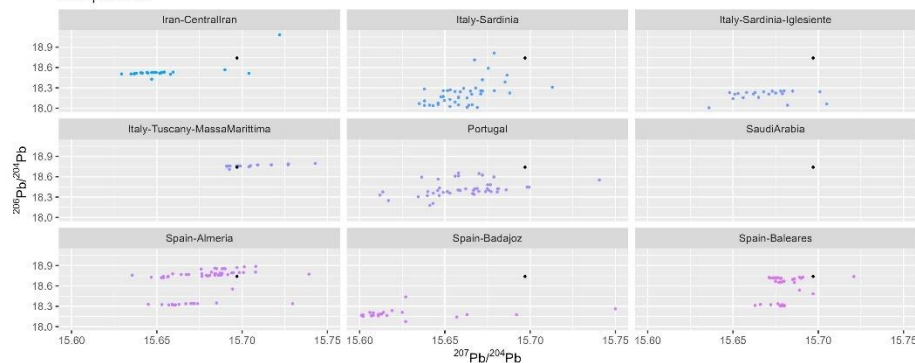

Sample R82

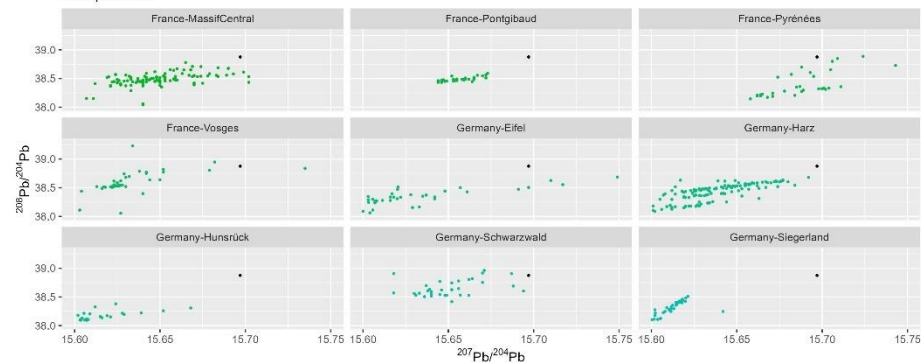

Sample R82

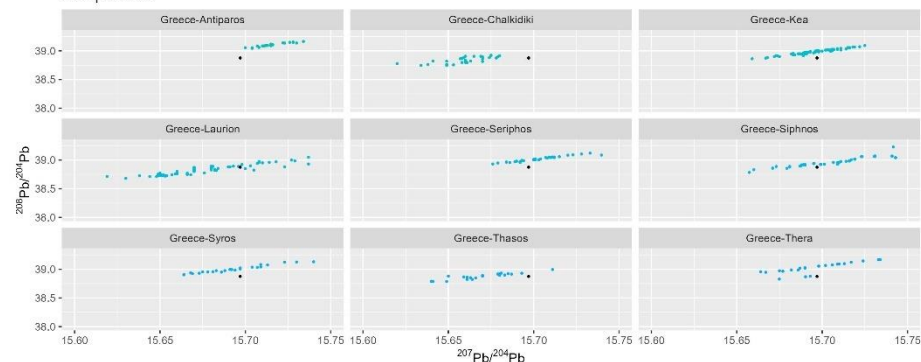

Sample R82

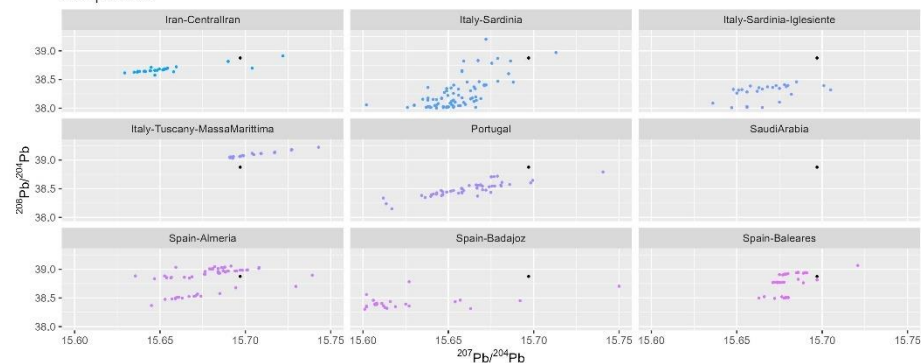

Sample R82

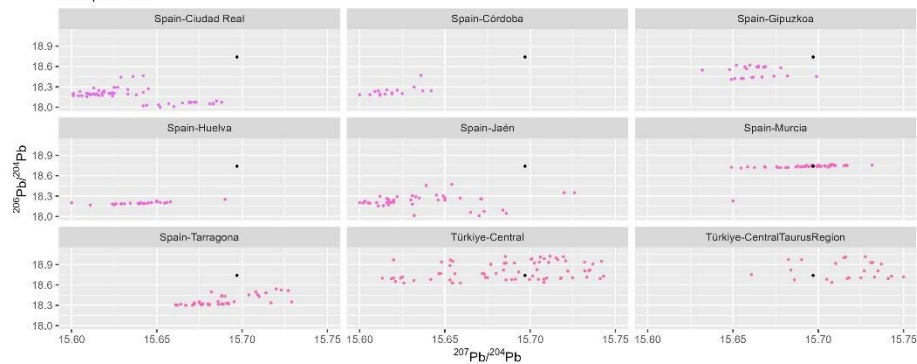

Sample R82

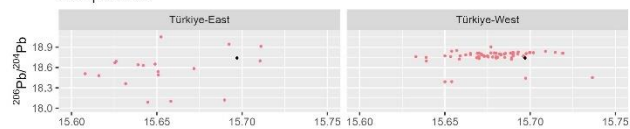

Sample R82

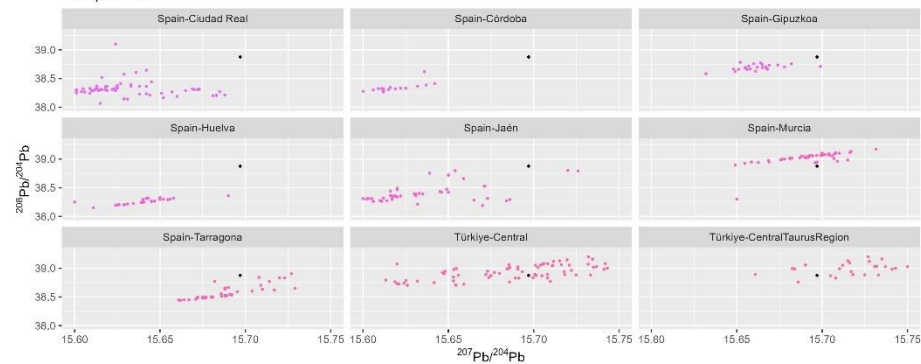

Sample R82

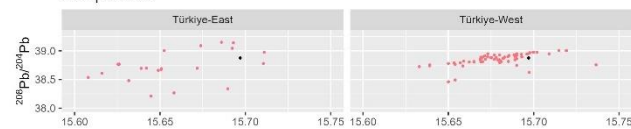 $^{207}\text{Pb}/^{204}\text{Pb}$ 

Sample R90

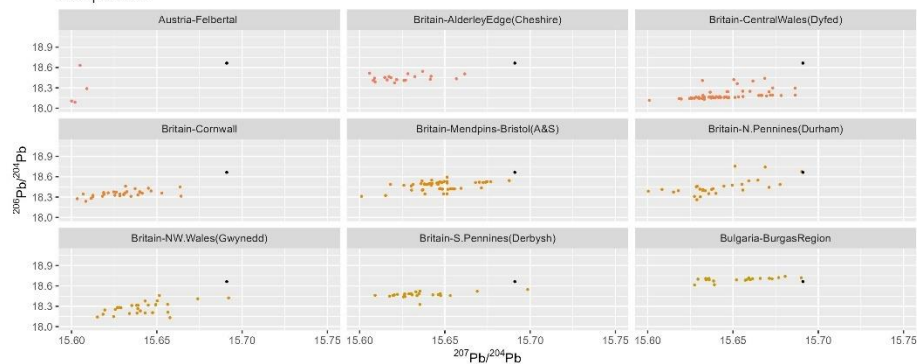 $^{207}\text{Pb}/^{204}\text{Pb}$ 

Sample R90

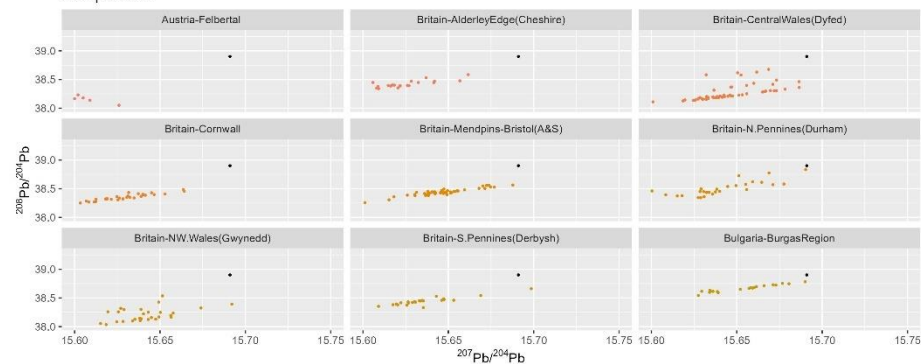



Sample R90

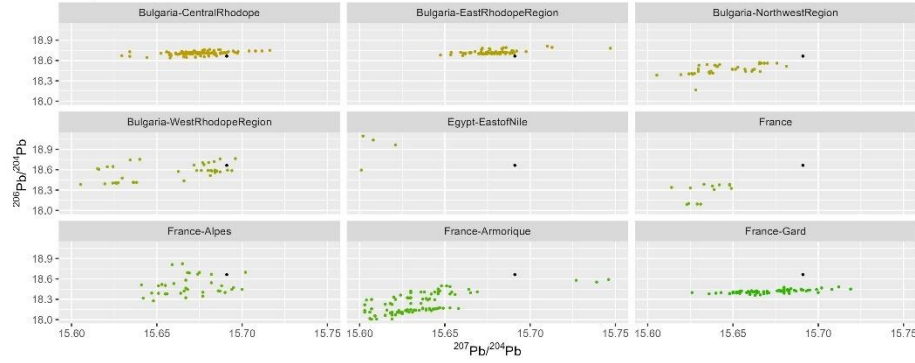

Sample R90

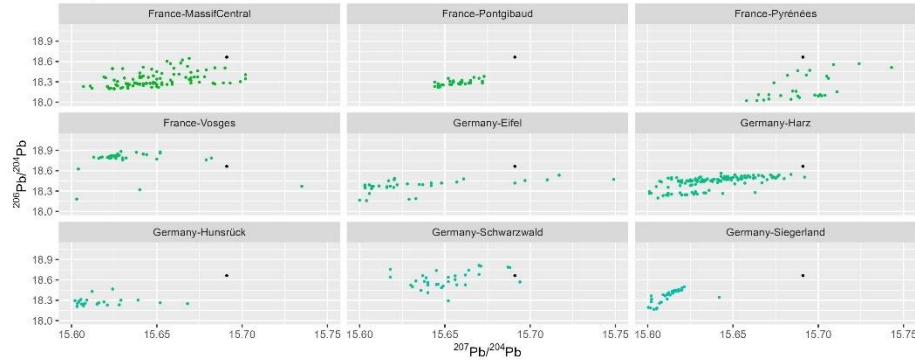

Sample R90

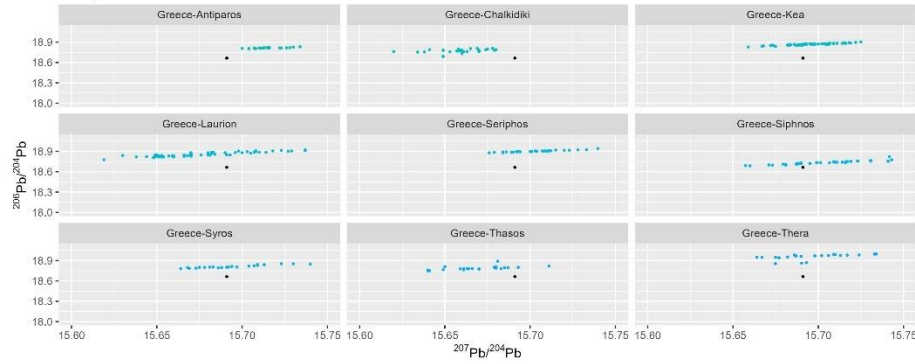

Sample R90

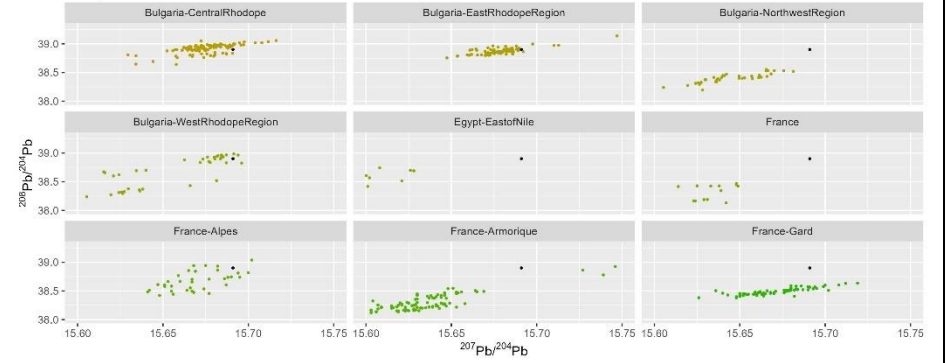

Sample R90

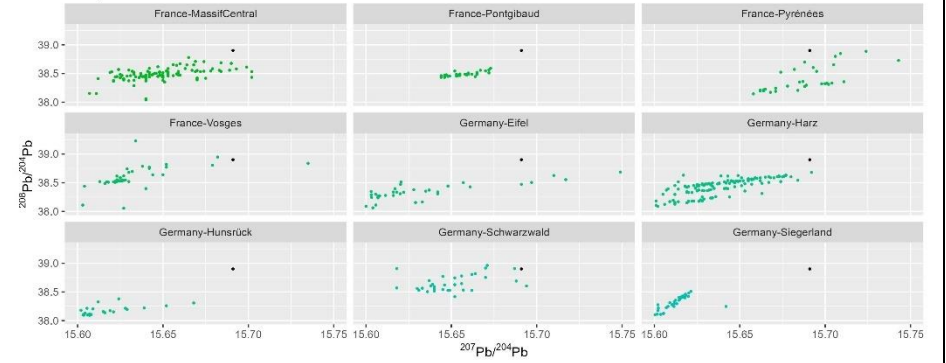

Sample R90

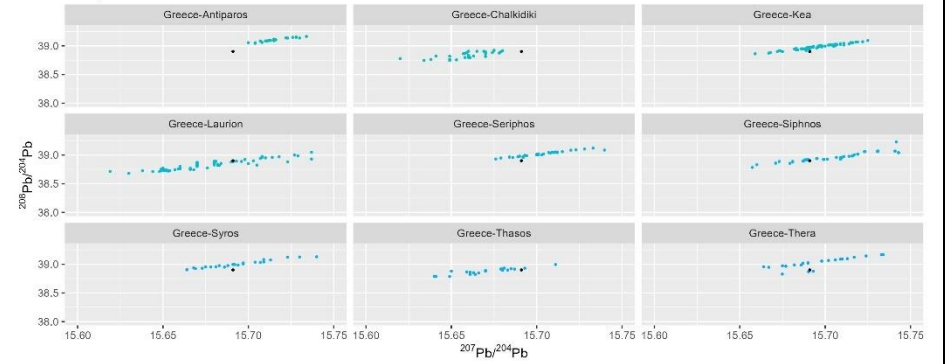



Sample R90

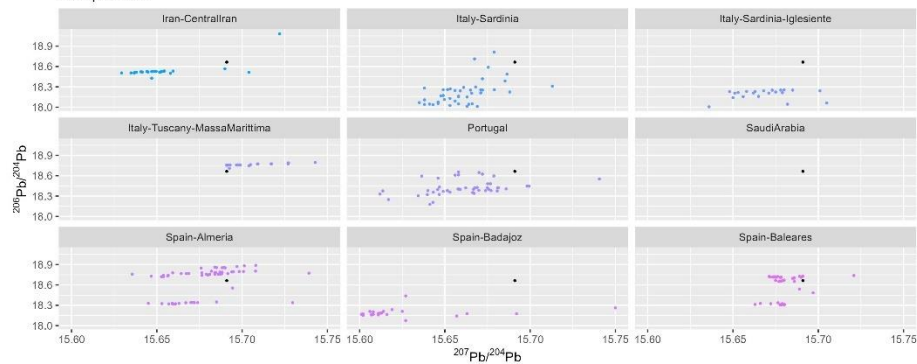

Sample R90

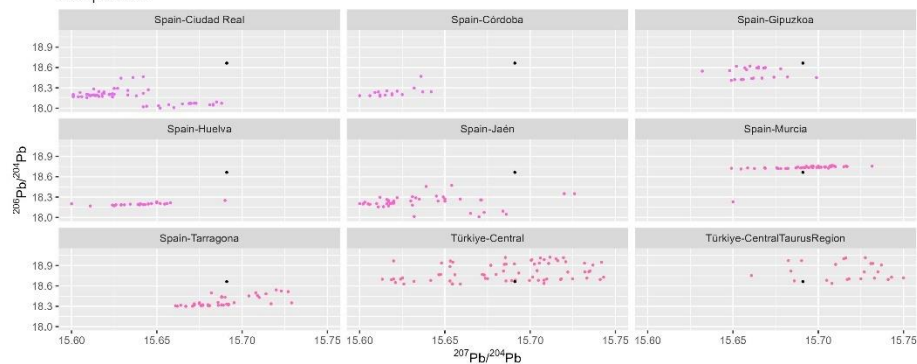

Sample R90

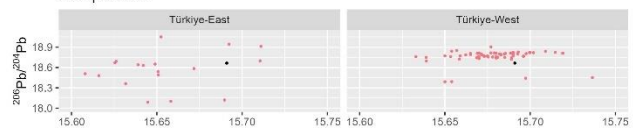 $^{207}\text{Pb}/^{204}\text{Pb}$ 

Sample R90

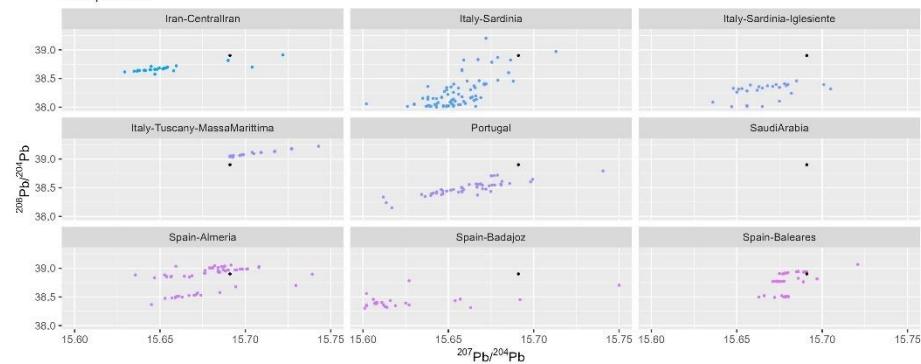

Sample R90

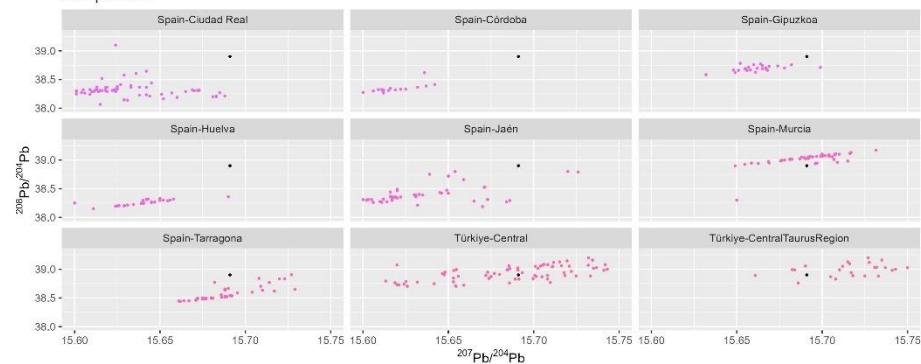

Sample R90

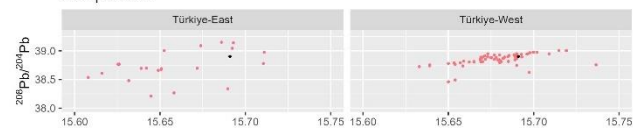 $^{207}\text{Pb}/^{204}\text{Pb}$

Sample R118

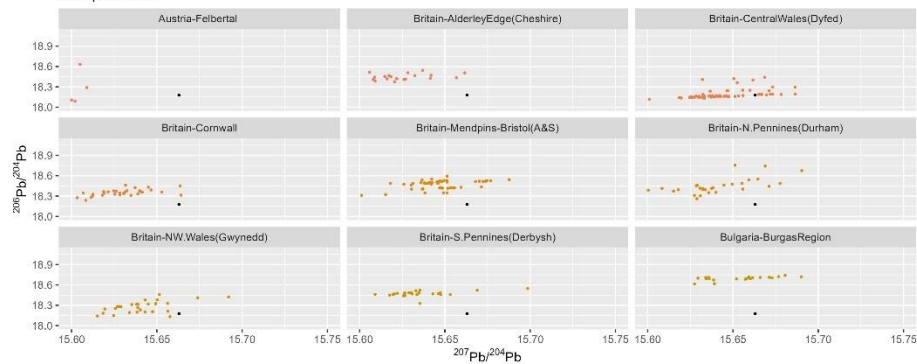

Sample R118

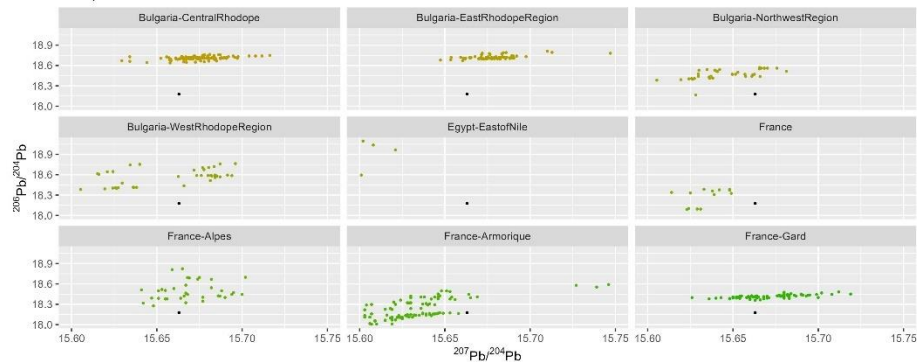

Sample R118

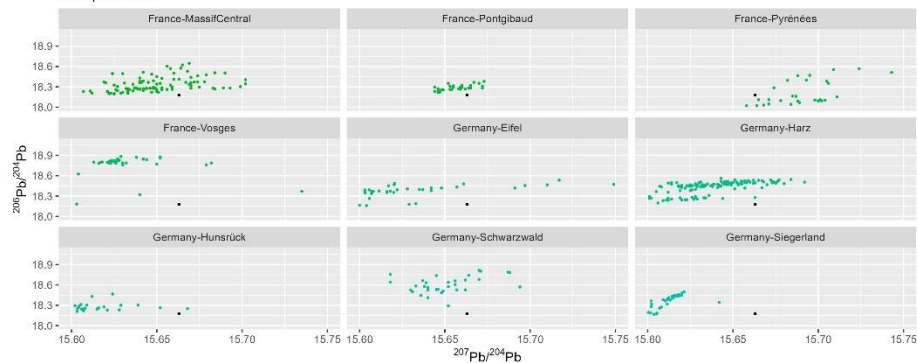

Sample R118

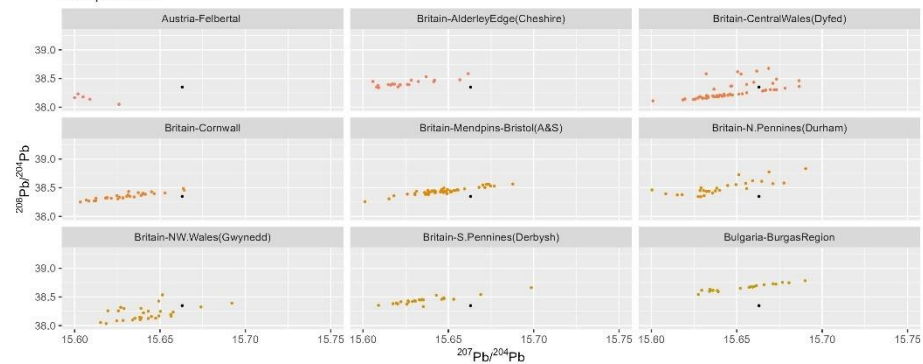

Sample R118

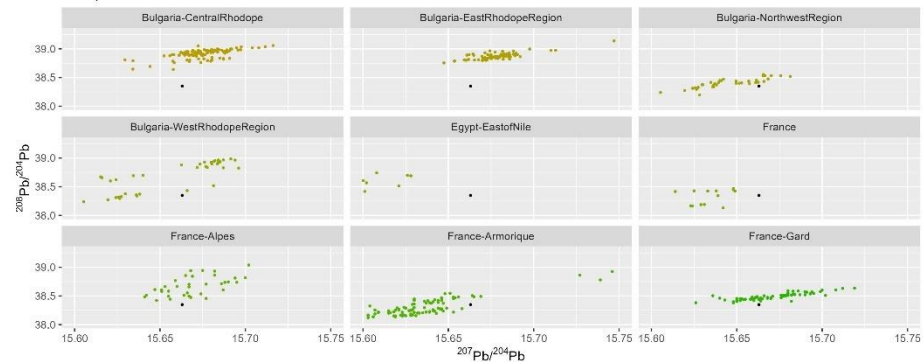

Sample R118

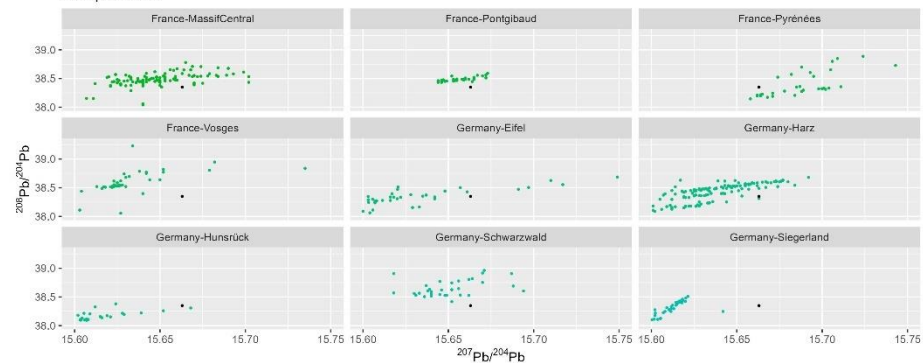

Sample R118

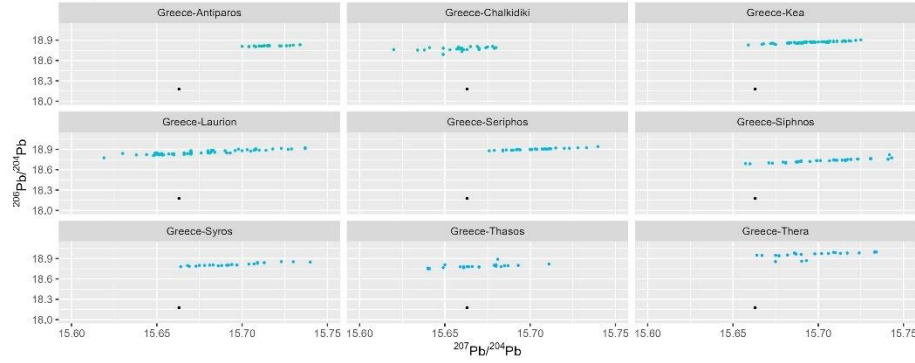

Sample R118

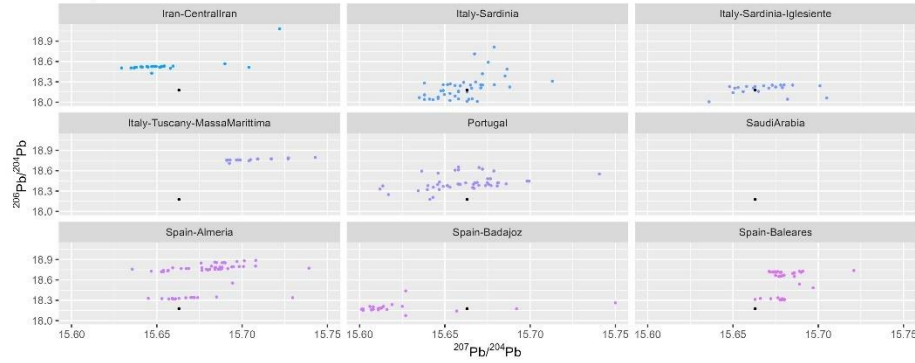

Sample R118

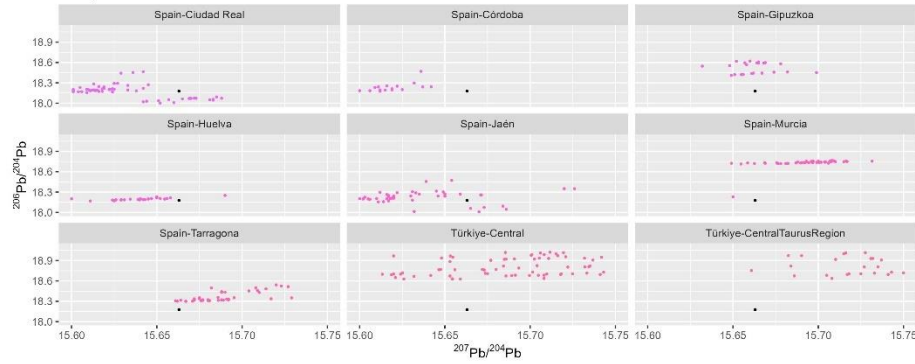

Sample R118

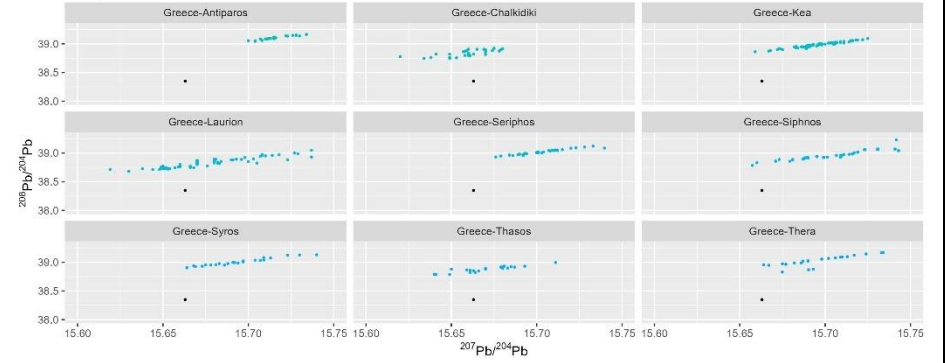

Sample R118

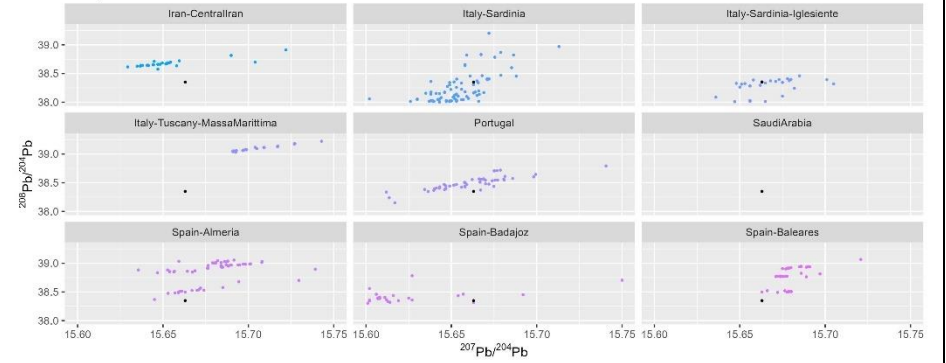

Sample R118

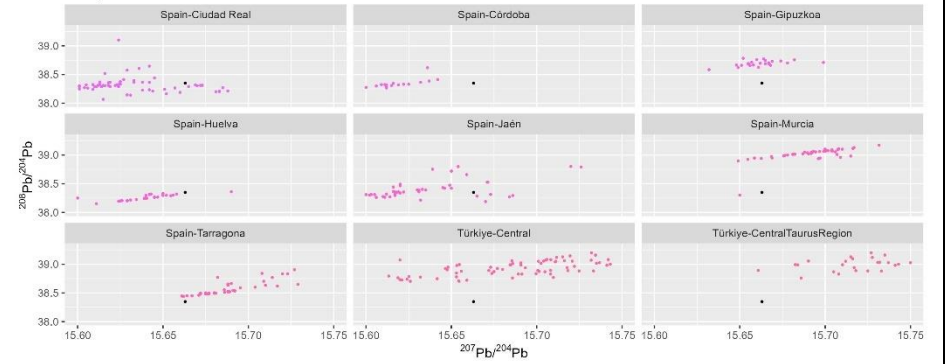

Sample R118

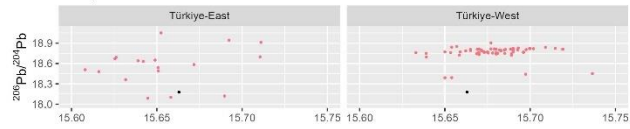

$^{207}\text{Pb}/^{204}\text{Pb}$

Sample R121

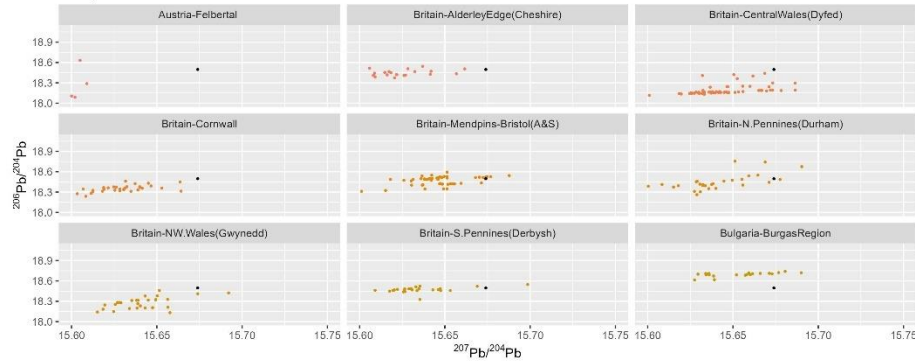

$^{207}\text{Pb}/^{204}\text{Pb}$

Sample R121

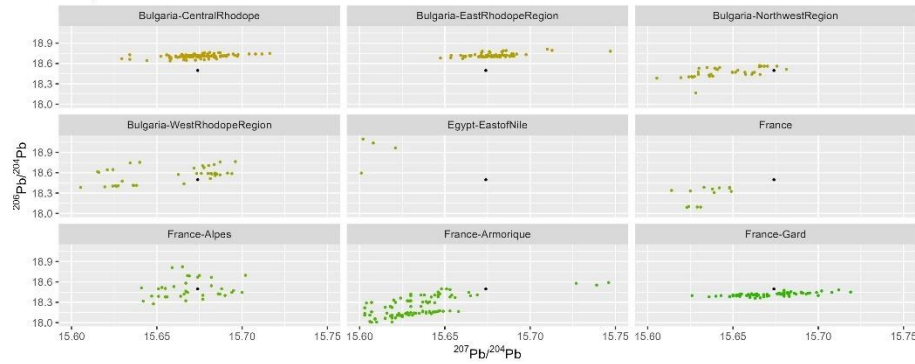

$^{207}\text{Pb}/^{204}\text{Pb}$

Sample R118

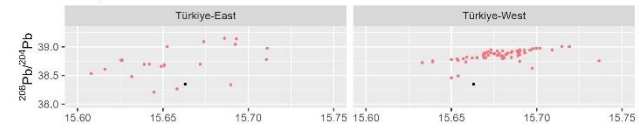

$^{207}\text{Pb}/^{204}\text{Pb}$

Sample R121

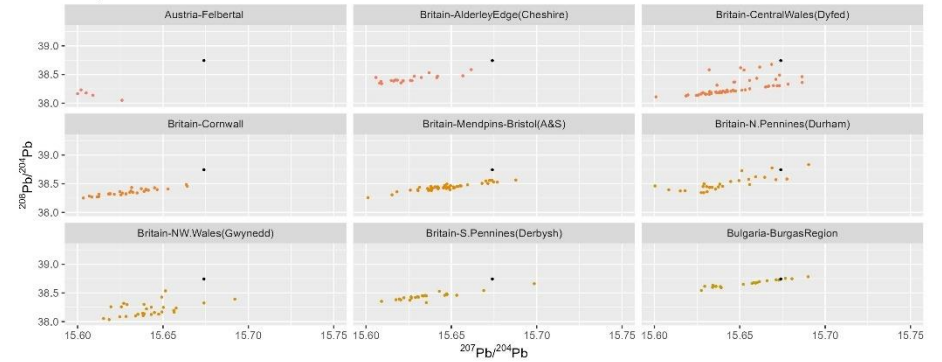

$^{207}\text{Pb}/^{204}\text{Pb}$

Sample R121

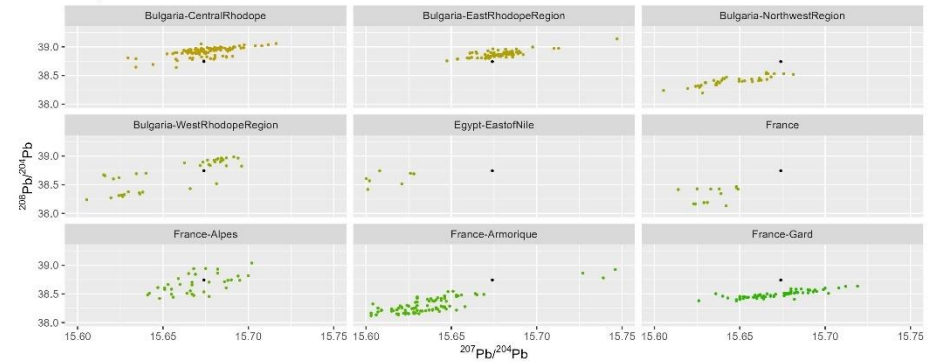

$^{207}\text{Pb}/^{204}\text{Pb}$



Sample R121

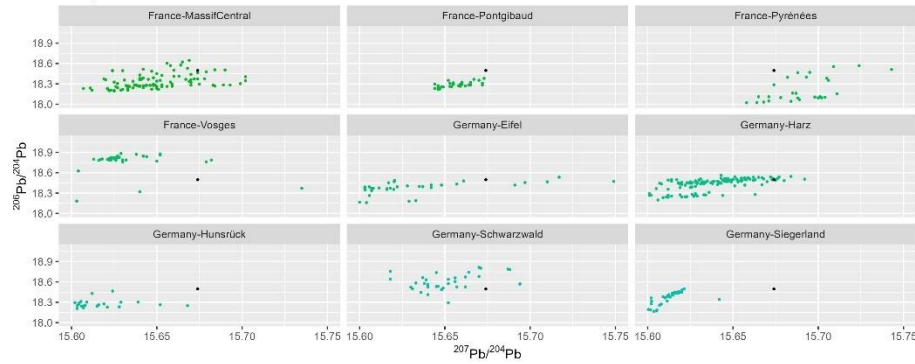

Sample R121

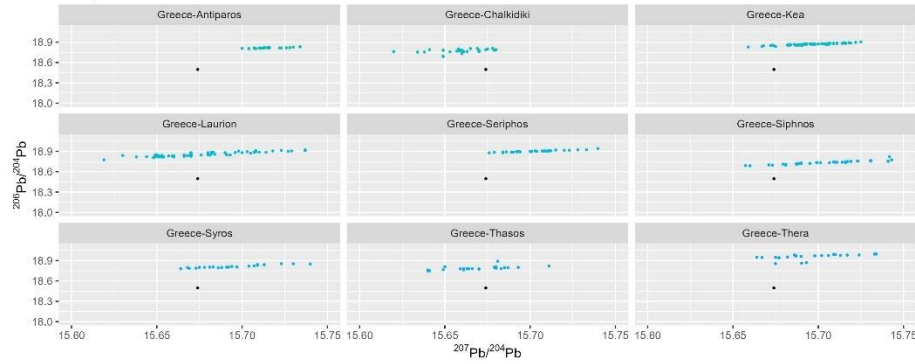

Sample R121

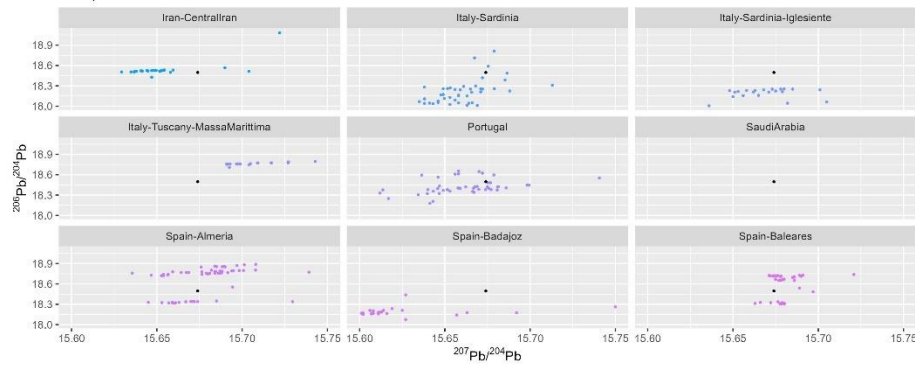

Sample R121

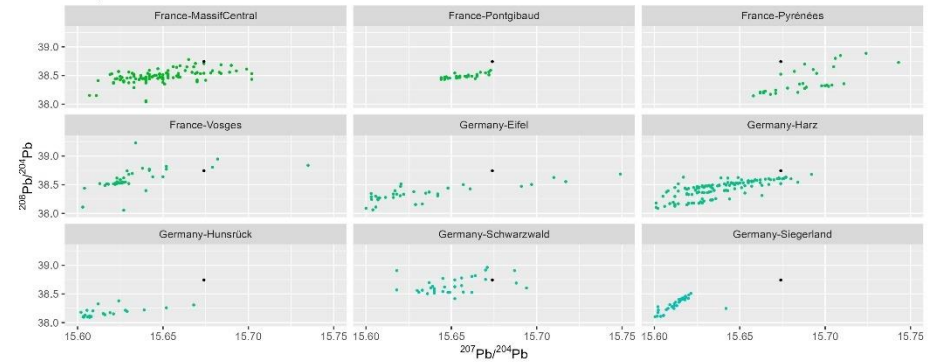

Sample R121

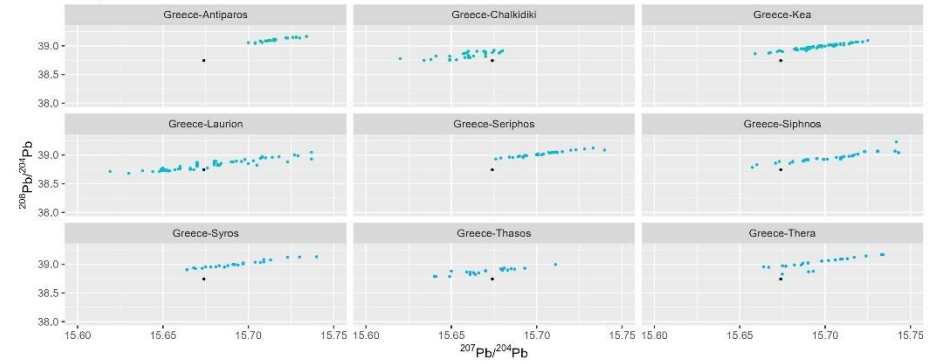

Sample R121

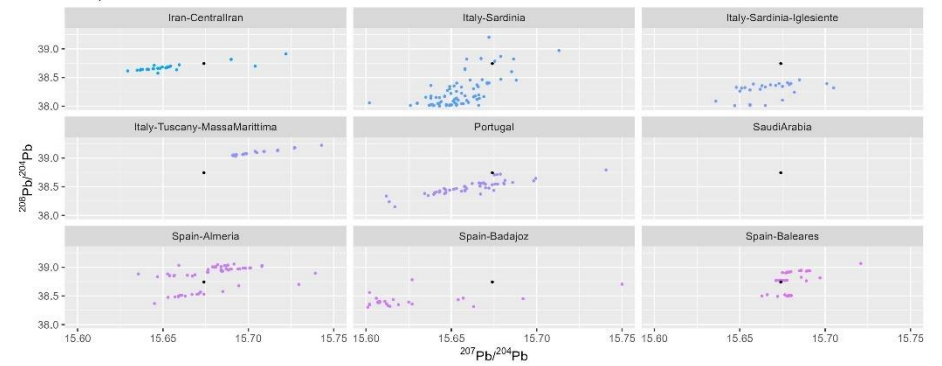



Sample R121

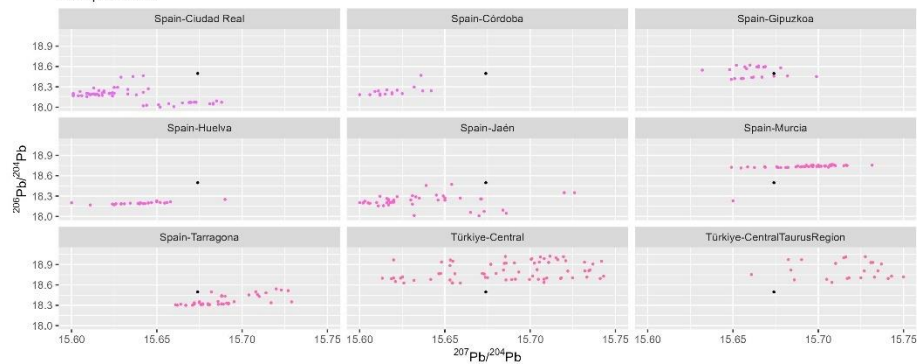

Sample R121

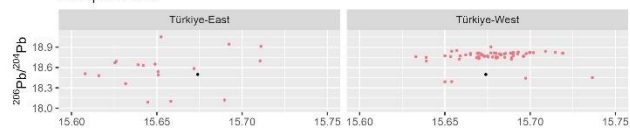

Sample R121

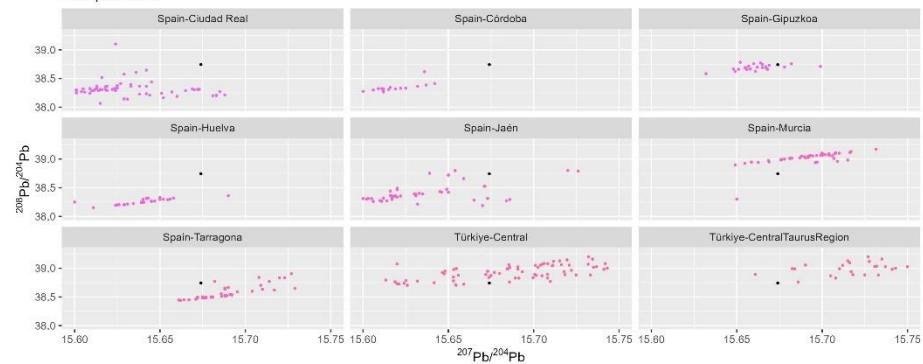

Sample R121

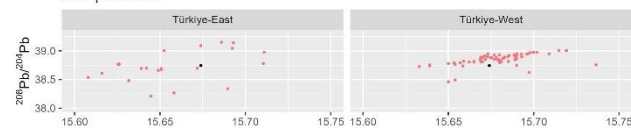

207Pb/204Pb

Sample R136

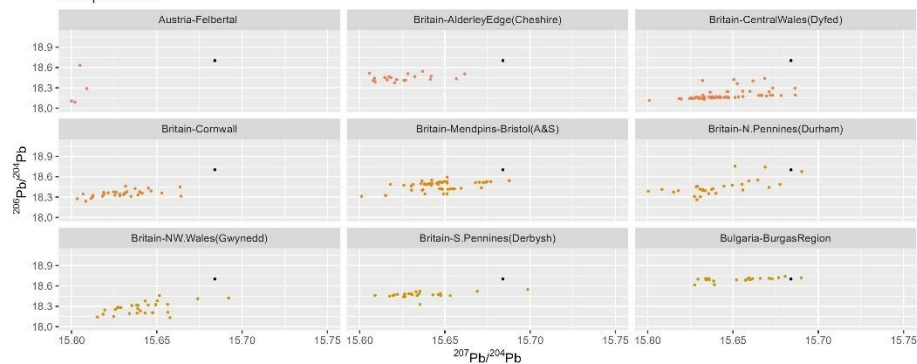

207Pb/204Pb

Sample R136

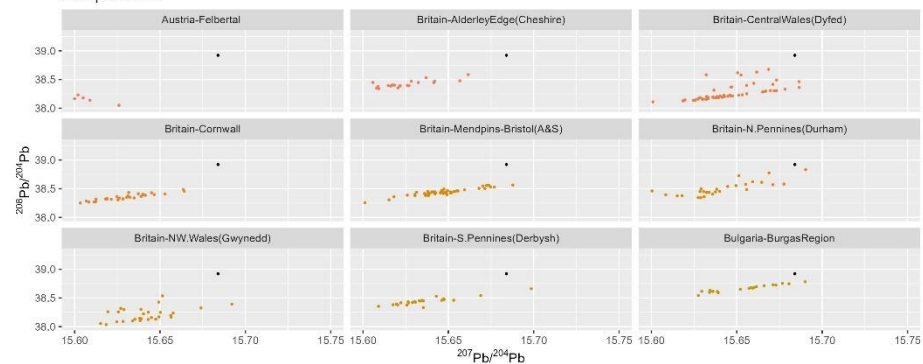

Sample R136

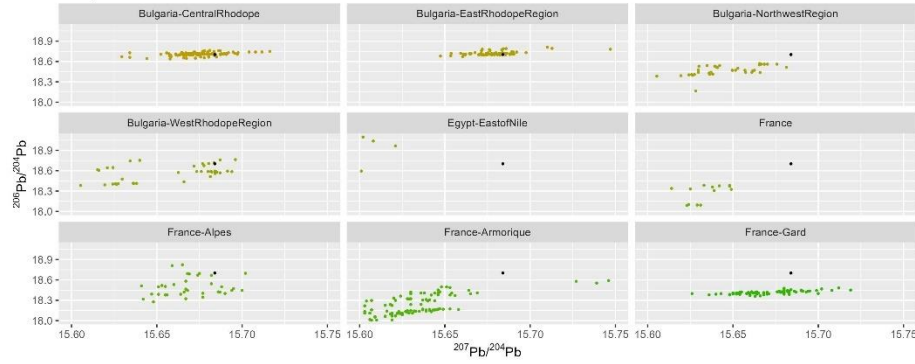

Sample R136

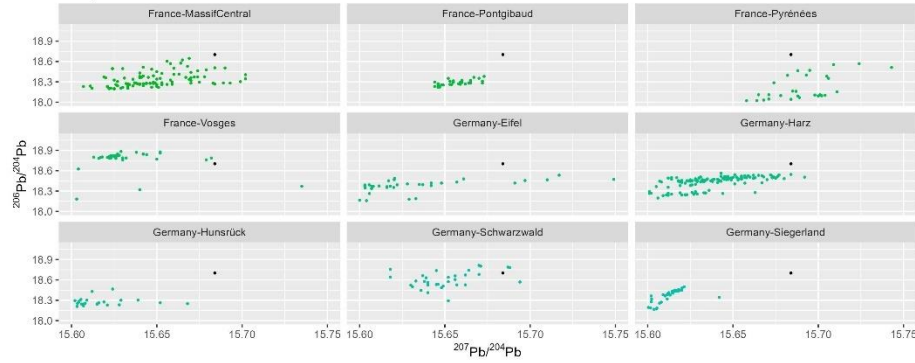

Sample R136

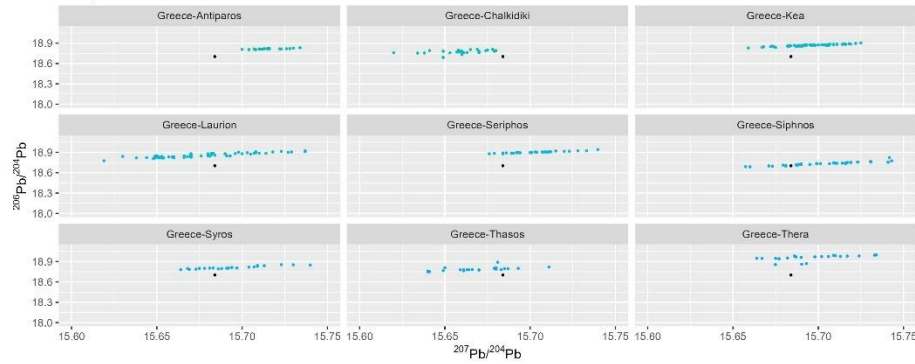

Sample R136

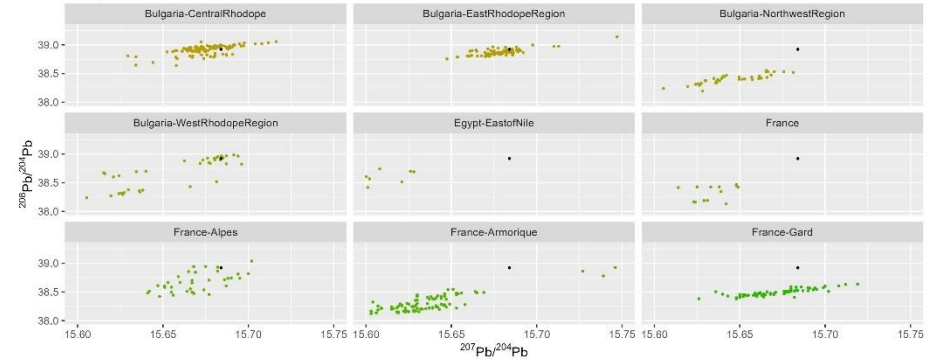

Sample R136

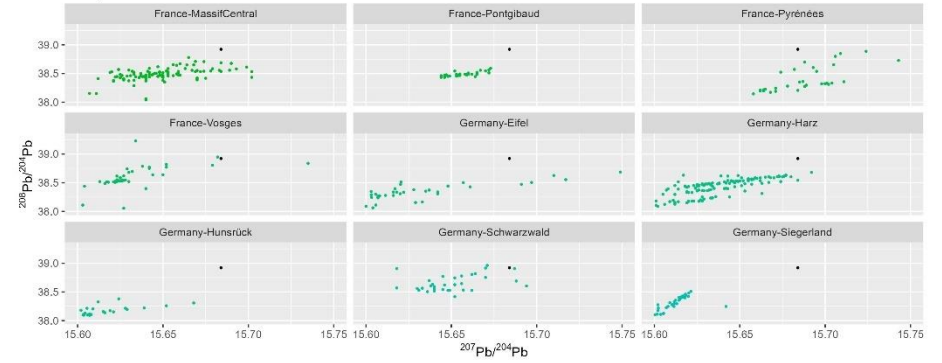

Sample R136

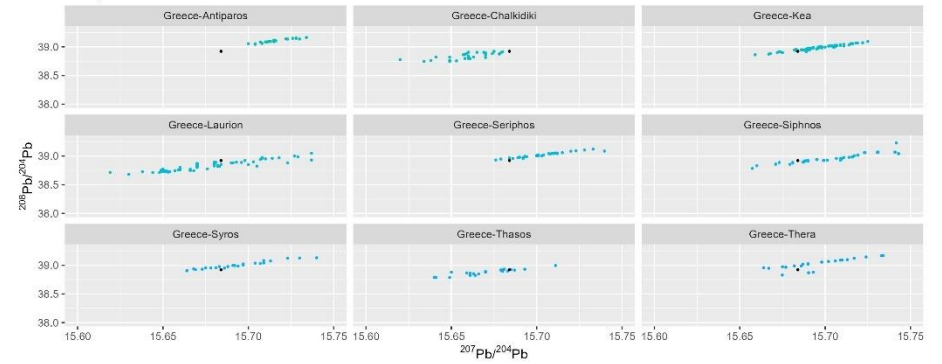

Sample R136

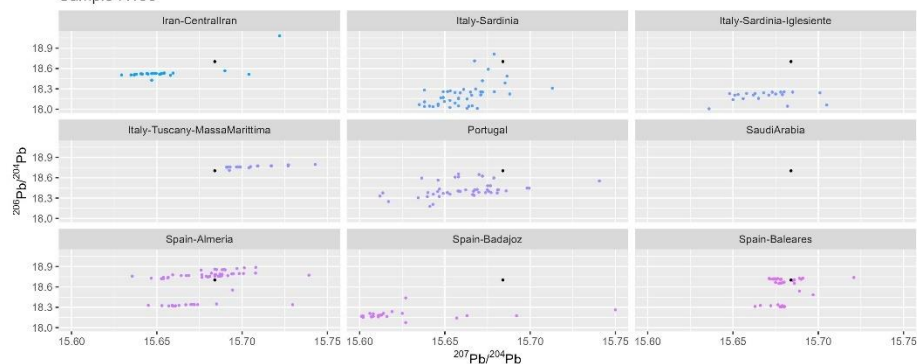

Sample R136

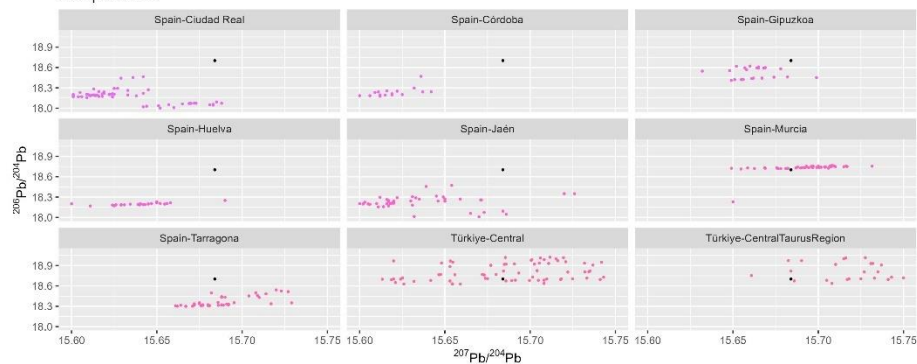

Sample R136

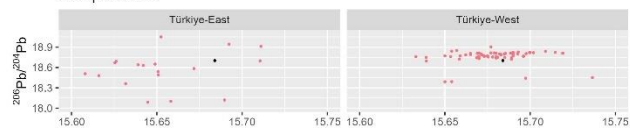 $^{207}\text{Pb}/^{204}\text{Pb}$ 

Sample R136

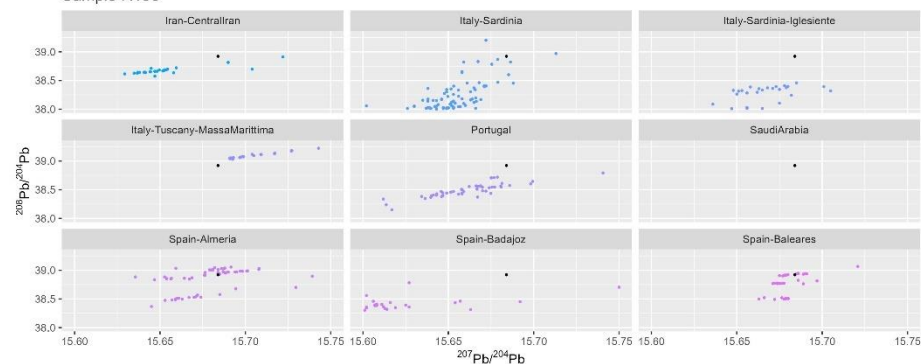

Sample R136

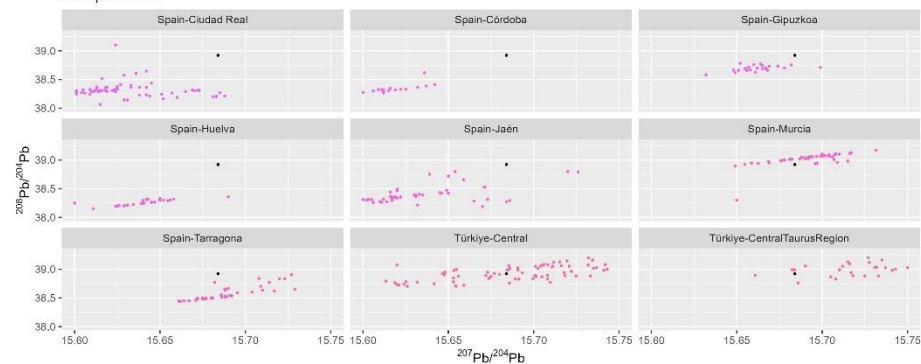

Sample R136

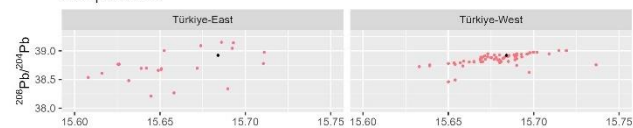 $^{207}\text{Pb}/^{204}\text{Pb}$

Sample TB037

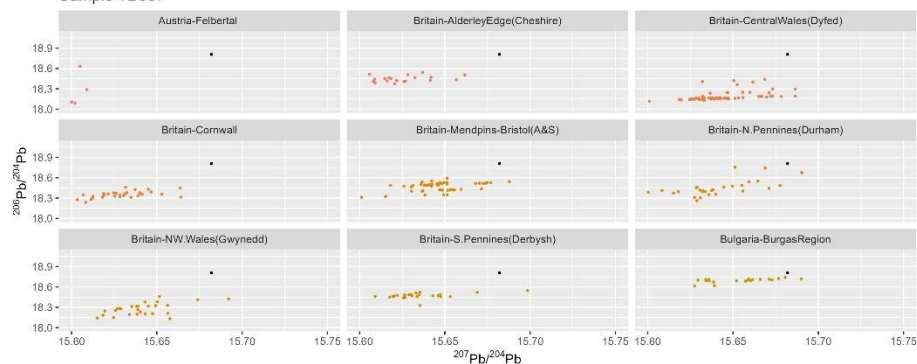

Sample TB037

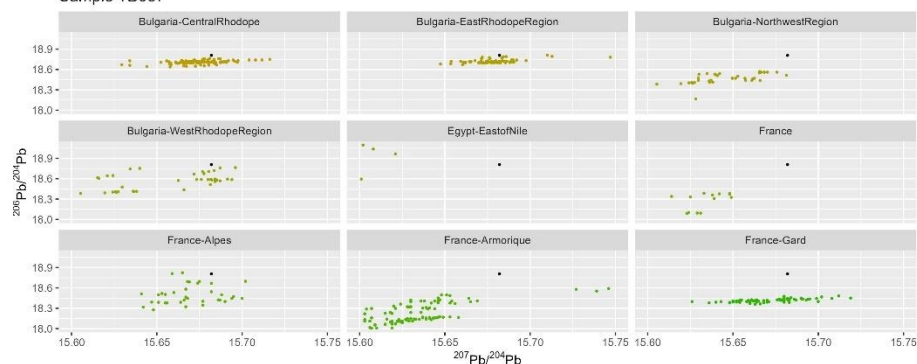

Sample TB037

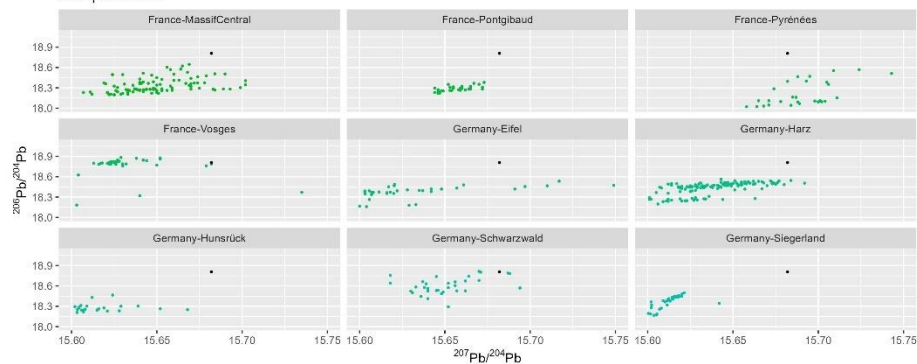

Sample TB037

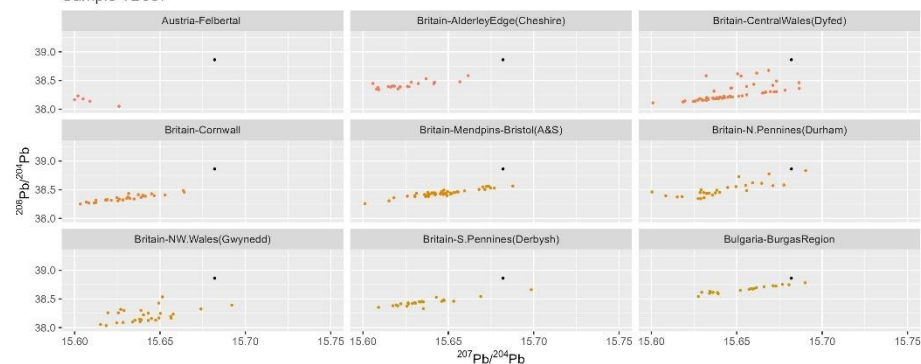

Sample TB037

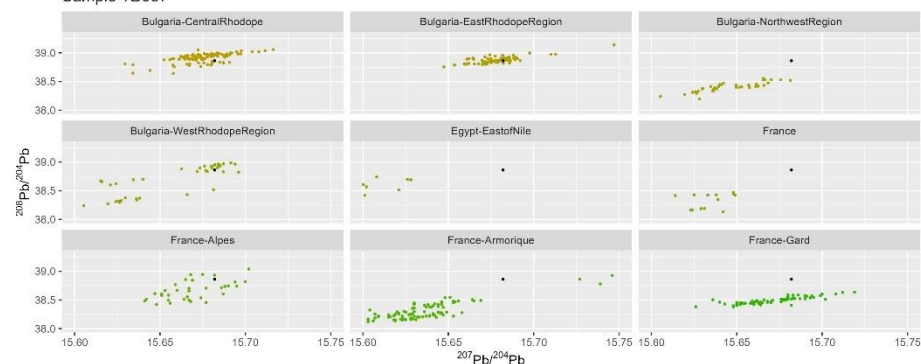

Sample TB037

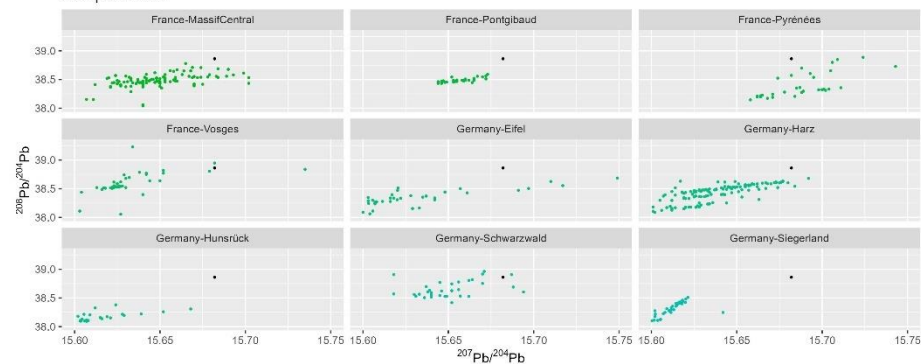



Sample TB037

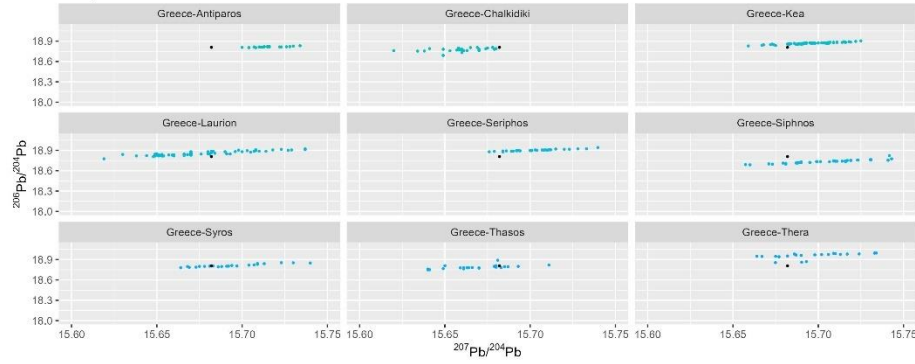

Sample TB037

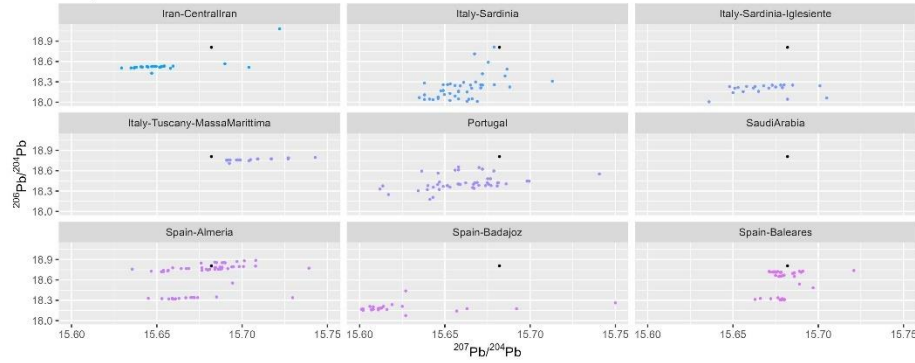

Sample TB037

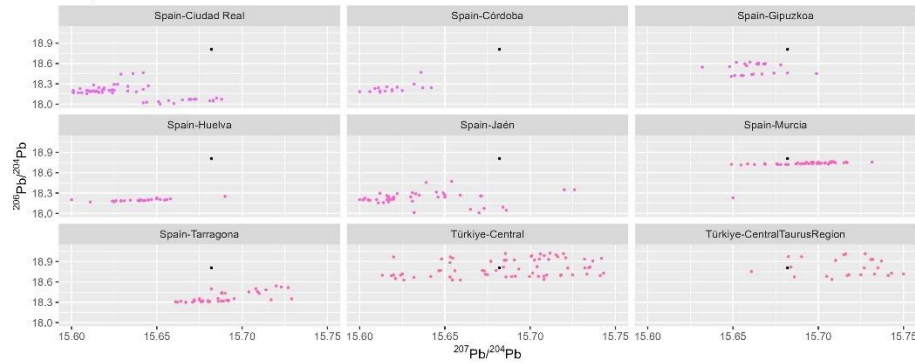

Sample TB037

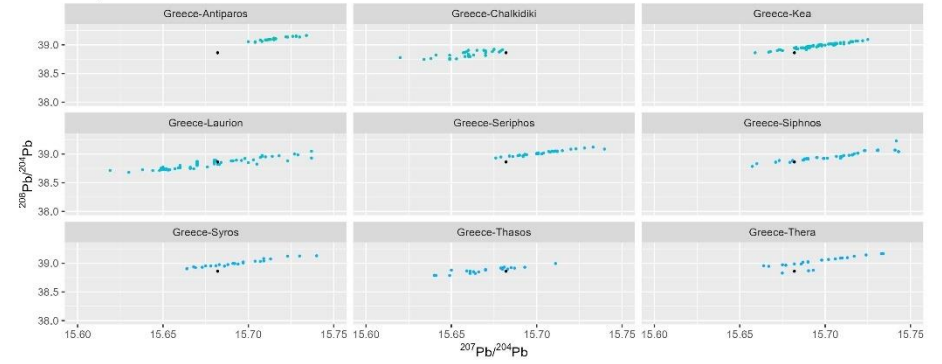

Sample TB037

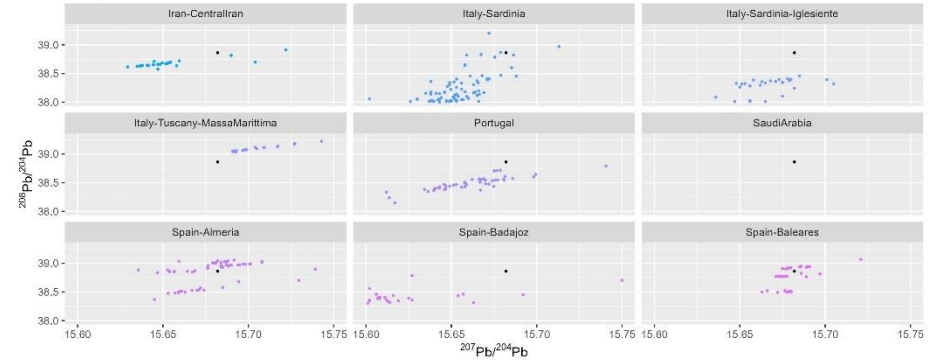

Sample TB037

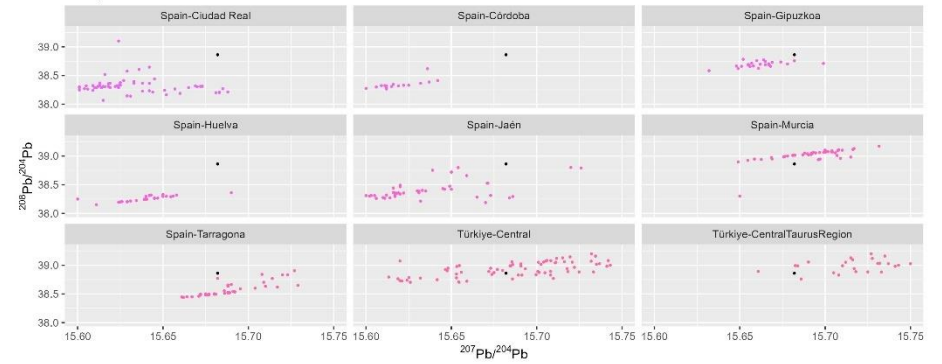



Sample TB037

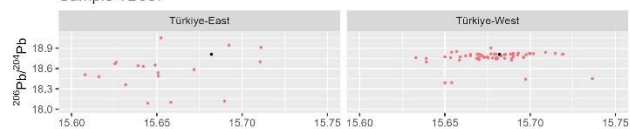 $^{207}\text{Pb}/^{204}\text{Pb}$ 

Sample TB038

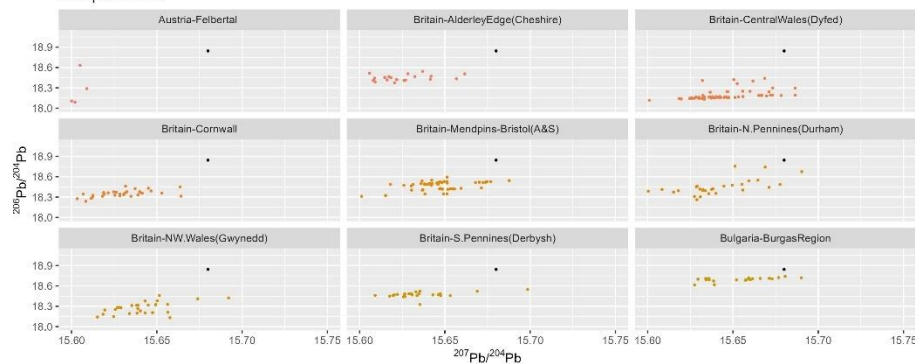 $^{207}\text{Pb}/^{204}\text{Pb}$ 

Sample TB038

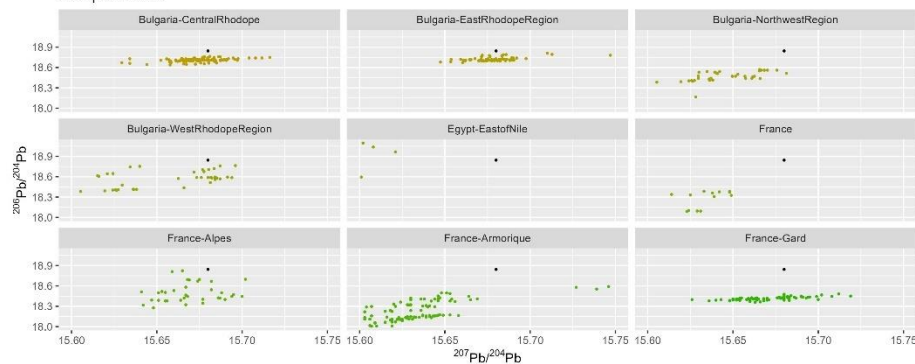 $^{207}\text{Pb}/^{204}\text{Pb}$ 

Sample TB037

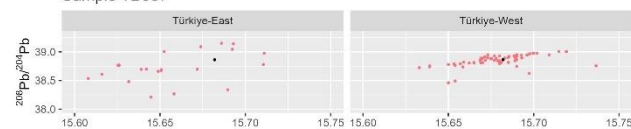 $^{207}\text{Pb}/^{204}\text{Pb}$ 

Sample TB038

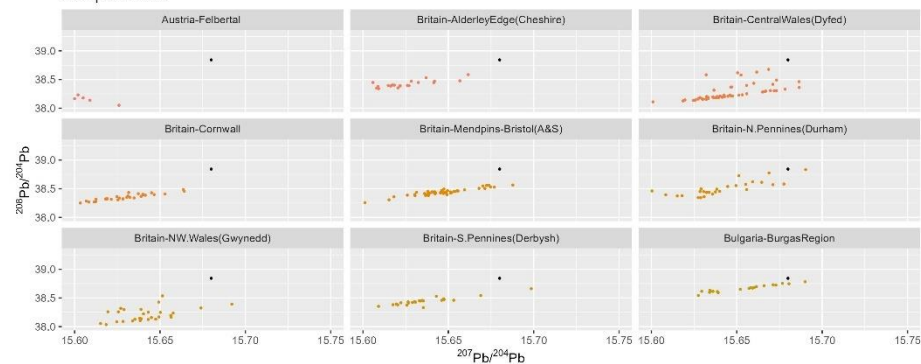 $^{207}\text{Pb}/^{204}\text{Pb}$ 

Sample TB038

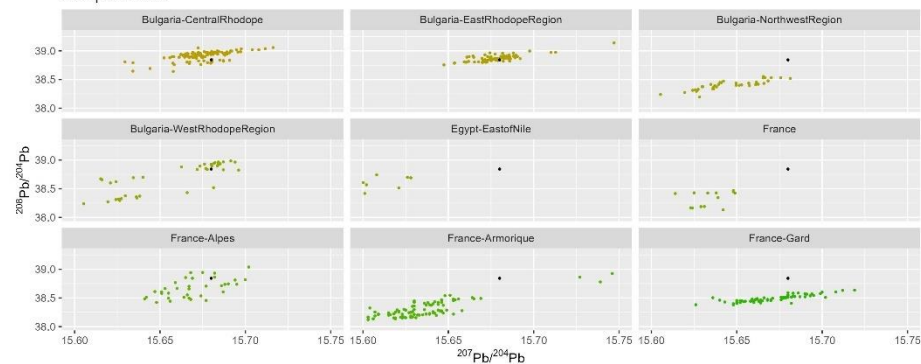 $^{207}\text{Pb}/^{204}\text{Pb}$

Sample TB038

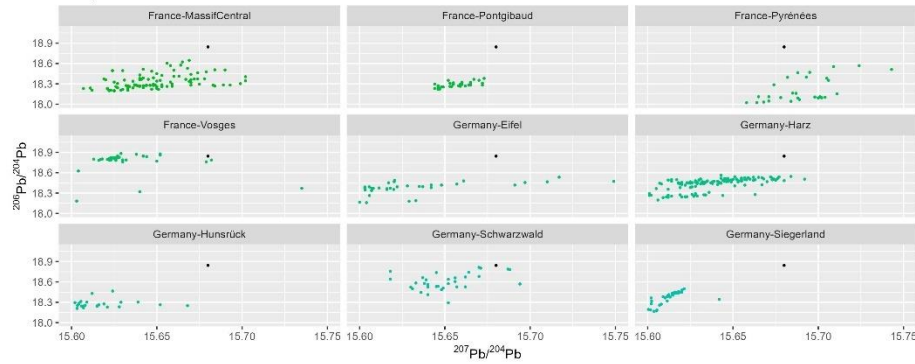

Sample TB038

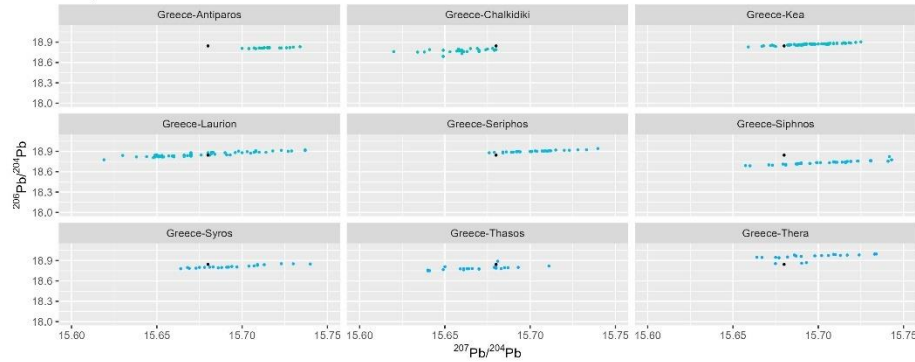

Sample TB038

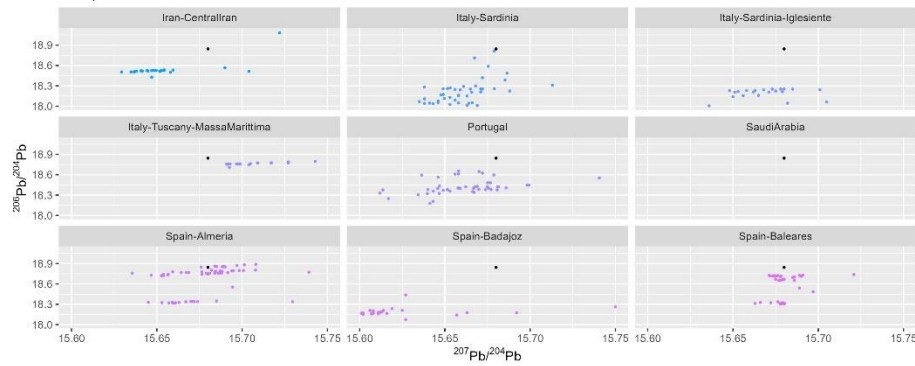

Sample TB038

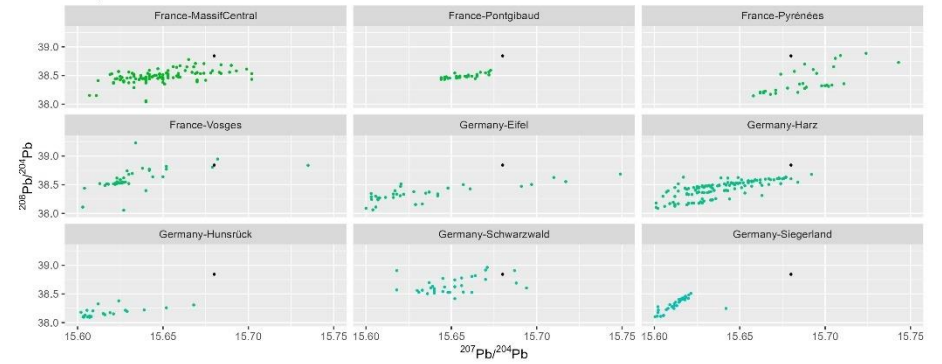

Sample TB038

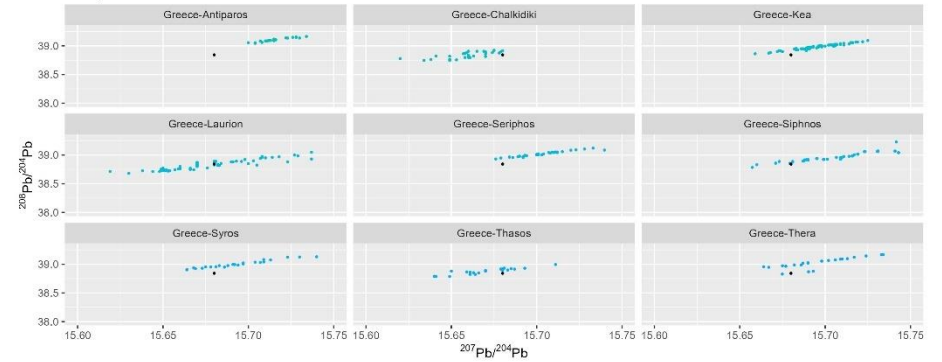

Sample TB038

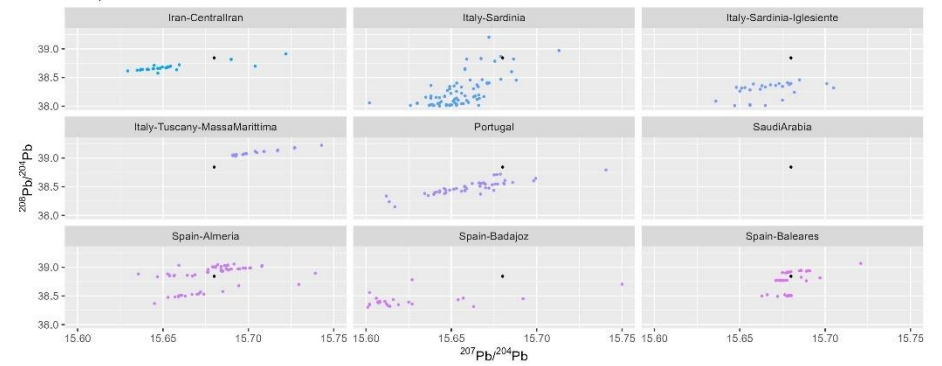

Sample TB038

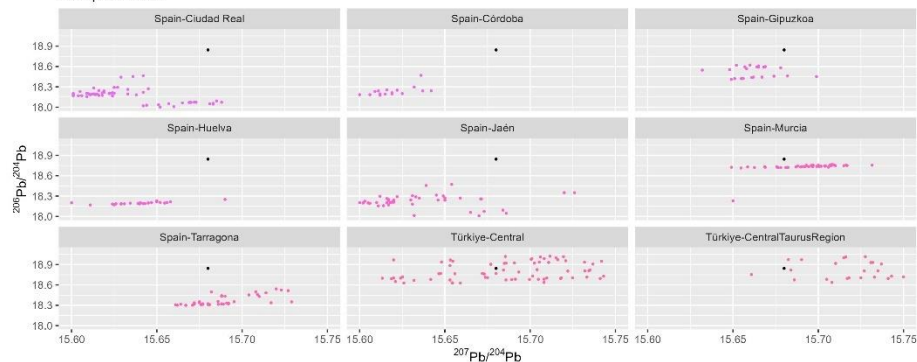

Sample TB038

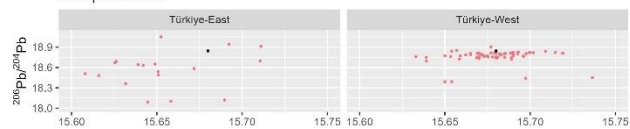

Sample TB038

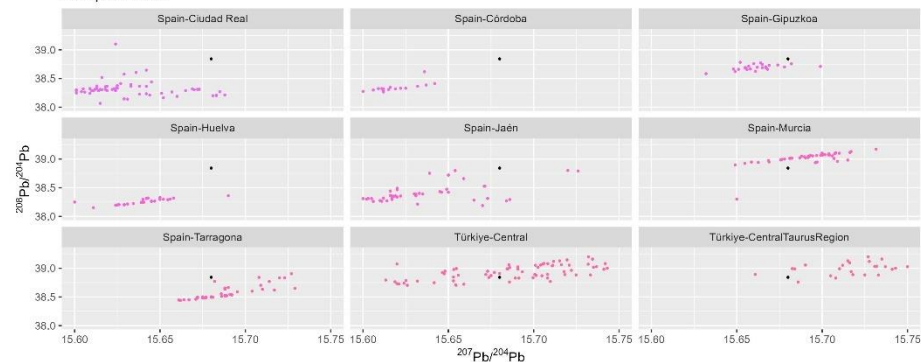

Sample TB038

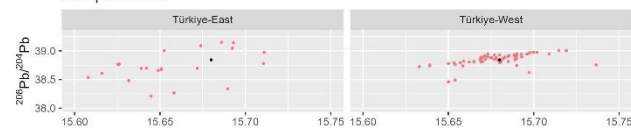

$^{207}\text{Pb}/^{204}\text{Pb}$

Sample TB039

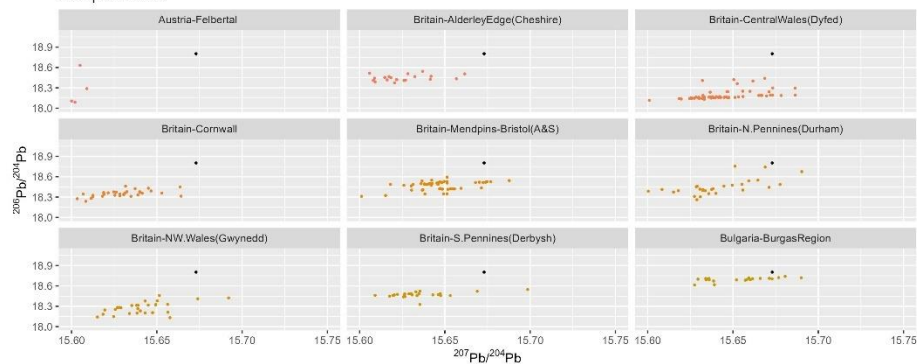

$^{207}\text{Pb}/^{204}\text{Pb}$

Sample TB039

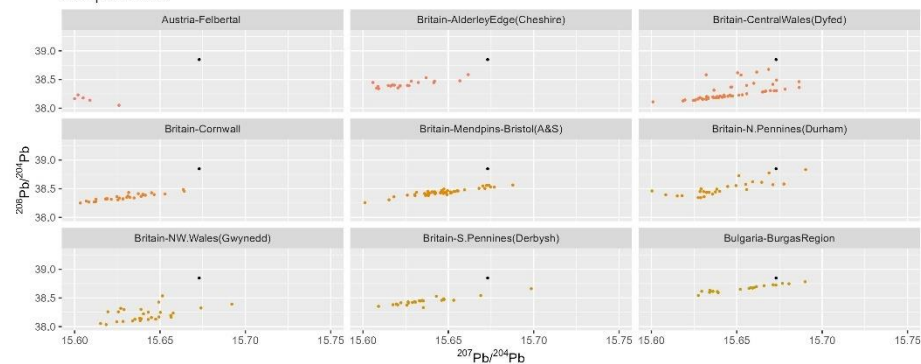

Sample TB039

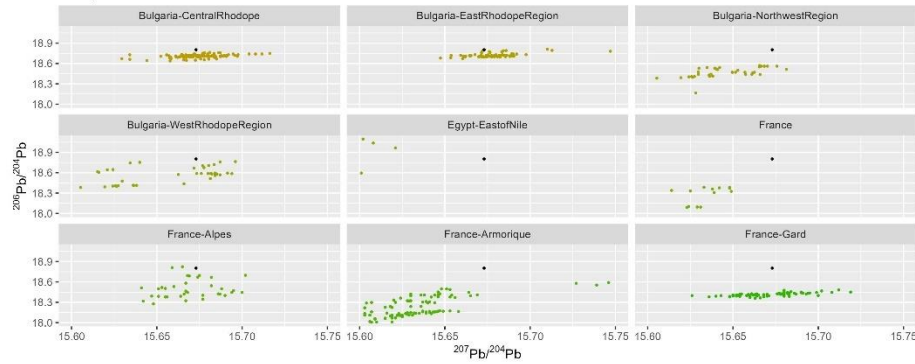

Sample TB039

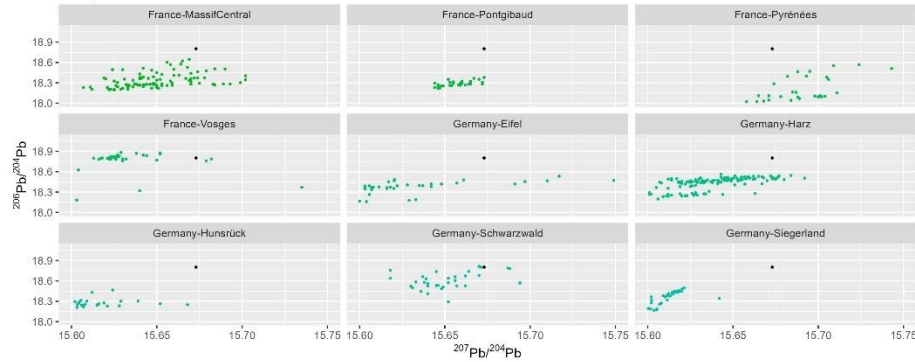

Sample TB039

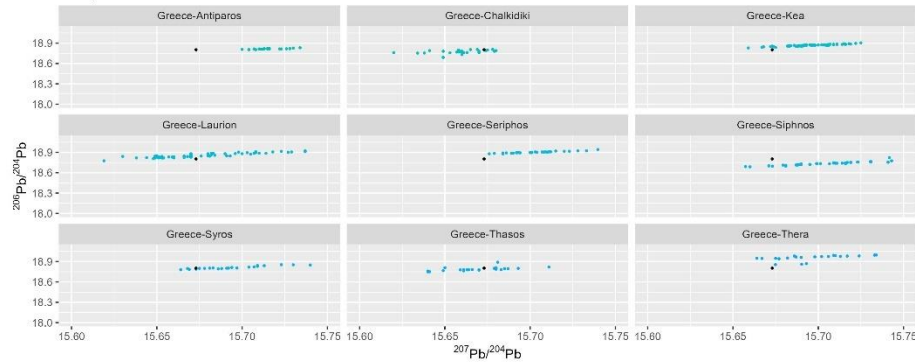

Sample TB039

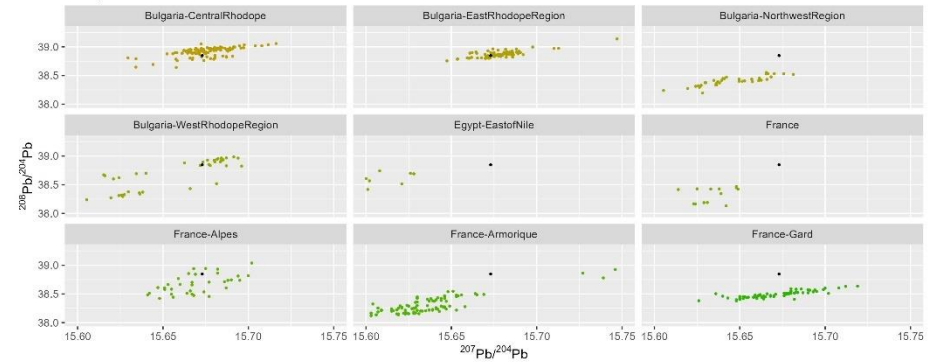

Sample TB039

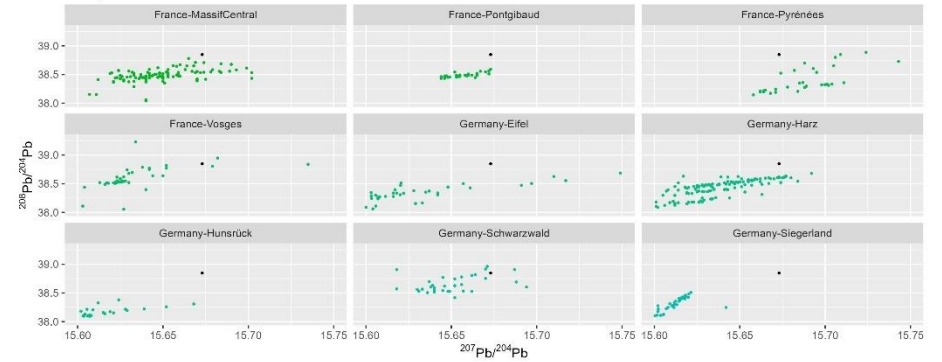

Sample TB039

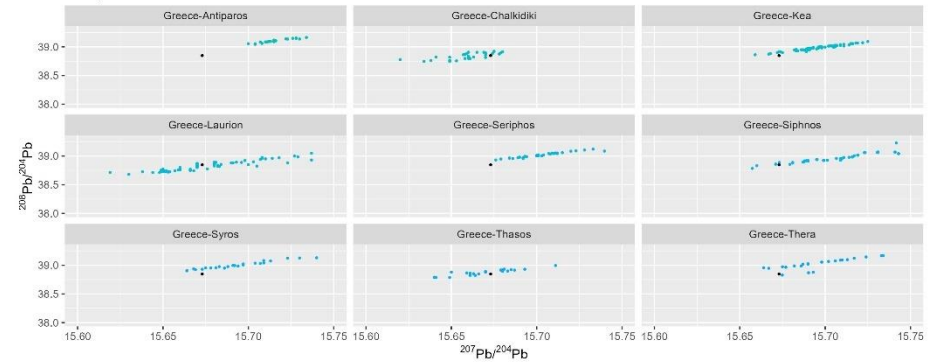

Sample TB039

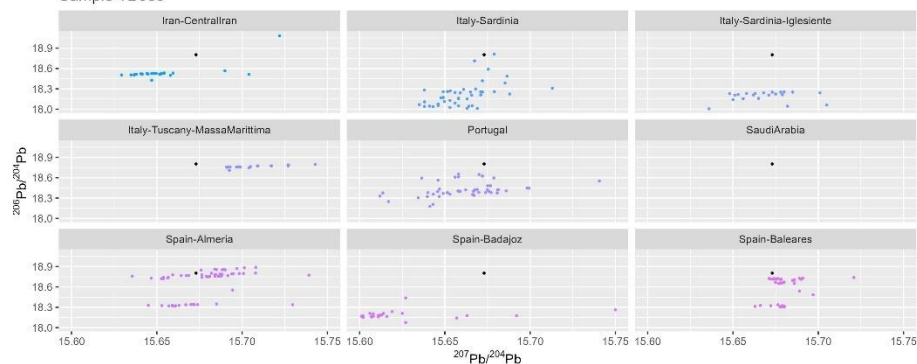

Sample TB039

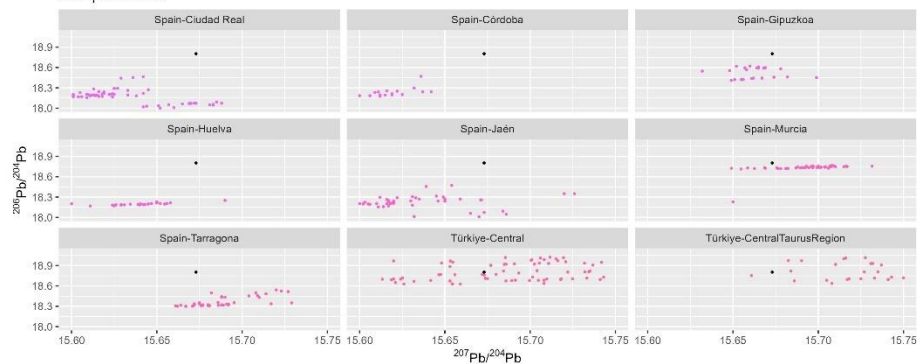

Sample TB039

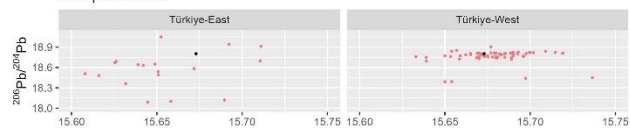 $^{207}\text{Pb}/^{204}\text{Pb}$ 

Sample TB039

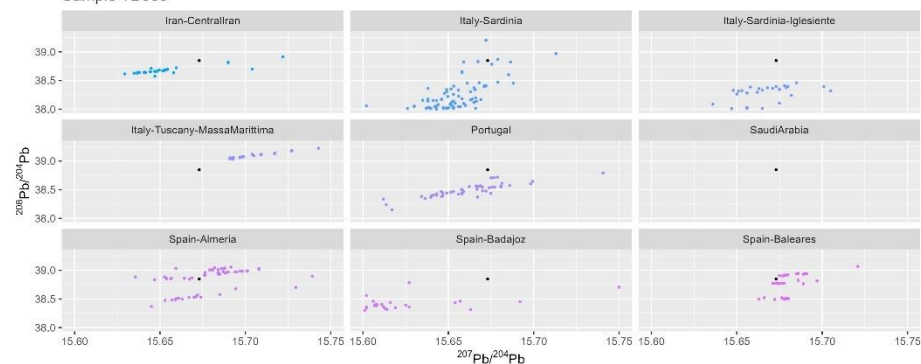

Sample TB039

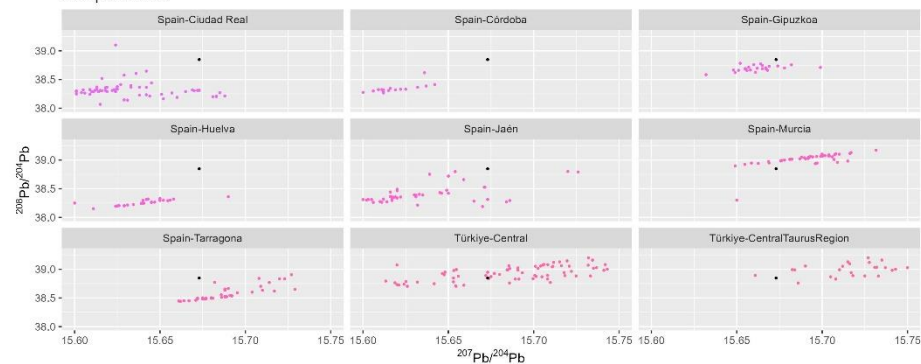

Sample TB039

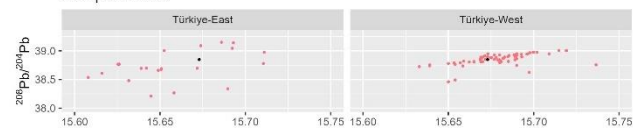 $^{207}\text{Pb}/^{204}\text{Pb}$



## Appendix 5: Overview table

| Sample           | Biplot Visual Results                                                                                                                                                                                                                                                       | Confidence ellipses (2σ)  | Confidence ellipses (3σ)  | Albarède group | Albarède allocation | KDE Group | KDE matches                     | KDE Highest rel. probability | Overlap plots | Combining methods               |
|------------------|-----------------------------------------------------------------------------------------------------------------------------------------------------------------------------------------------------------------------------------------------------------------------------|---------------------------|---------------------------|----------------|---------------------|-----------|---------------------------------|------------------------------|---------------|---------------------------------|
| R118             | Britain-CentralWales(Dyfed)<br>France-Armorique<br>Italy-Sardinia<br>Italy-Sardinia-Iglesiente<br>Spain-Badajoz<br>Spain-Ciudad Real<br>Spain-Huelva<br>Spain-Jaén<br>Türkiye-East                                                                                          | Italy-Sardinia-Iglesiente | Italy-Sardinia-Iglesiente | 5              | Hercynian orogeny   | 1         | Spain-Ciudad Real<br>Spain-Jaén | Spain-Ciudad Real            |               | Spain-Ciudad Real<br>Spain-Jaén |
| 11-Denarius-44-5 | Britain-N.Pennines(Durham)<br>Bulgaria-BurgasRegion<br>Bulgaria-CentralRhodope<br>Bulgaria-EastRhodopeRegion<br>Bulgaria-WestRhodopeRegion<br>France-Alpes<br>France-Vosges<br>Germany-Schwarzwald<br>Greece-Siphnos<br>Italy-Sardinia<br>Spain-Baleares<br>Türkiye-Central | Spain-Almeria             | Spain-Almeria             | 2              | Baetic orogeny      | 1a        | Bulgaria-EastRhodopeRegion      | Bulgaria-EastRhodopeRegion   |               | mixed/recycled                  |
| 15-Janus-29-3    | Bulgaria-BurgasRegion<br>Bulgaria-CentralRhodope<br>Bulgaria-EastRhodopeRegion<br>Bulgaria-WestRhodopeRegion<br>France-Alpes<br>France-MassifCentral<br>Germany-Schwarzwald<br>Italy-Sardinia<br>Spain-Baleares<br>Türkiye-Central<br>Türkiye-East<br>Türkiye-West          |                           | Spain-Almeria             | 2              | Baetic orogeny      | 1a        | Spain-Baleares                  | Spain-Baleares               |               | mixed/recycled                  |

|                      |                                                                                                                                                                                                                                                                          |              |               |   |                |    |                                           |                |  |                           |
|----------------------|--------------------------------------------------------------------------------------------------------------------------------------------------------------------------------------------------------------------------------------------------------------------------|--------------|---------------|---|----------------|----|-------------------------------------------|----------------|--|---------------------------|
| 25-Victoriatus-112-1 | Britain-N.Pennines(Durham)<br>Bulgaria-BurgasRegion<br>Bulgaria-CentralRhodope<br>Bulgaria-EastRhodopeRegion<br>Bulgaria-WestRhodopeRegion<br>France-Alpes<br>Germany-Schwarzwald<br>Italy-Sardinia<br>Spain-Baleares<br>Türkiye-Central<br>Türkiye-East<br>Türkiye-West |              | Spain-Almeria | 2 | Baetic orogeny | 1a | Spain-Baleares                            | Spain-Baleares |  | mixed/recycled            |
| DE004                | Britain-N.Pennines(Durham)<br>Bulgaria-BurgasRegion<br>Bulgaria-CentralRhodope<br>Bulgaria-WestRhodopeRegion<br>France-Alpes<br>Italy-Sardinia<br>Spain-Baleares                                                                                                         |              | Spain-Almeria | 2 | Baetic orogeny | 1a | Greece-Chalkidiki<br>Spain-Baleares       | Spain-Baleares |  | mixed/recycled            |
| MS022                | Britain-N.Pennines(Durham)<br>Bulgaria-CentralRhodope<br>Bulgaria-EastRhodopeRegion<br>Bulgaria-WestRhodopeRegion<br>France-Alpes<br>Germany-Schwarzwald<br>Greece-Siphnos<br>Italy-Sardinia<br>Spain-Baleares<br>Türkiye-Central<br>Türkiye-CentralTaurusRegion         | Spain-Murcia | Spain-Murcia  | 4 | Mesozoic age   | 1a | Bulgaria-CentralRhodope<br>Spain-Baleares | Spain-Baleares |  | Bulgarian Rhodope regions |

|       |                                                                                                                                                                                                                              |              |                               |   |              |    |                                                                                           |                         |  |                           |
|-------|------------------------------------------------------------------------------------------------------------------------------------------------------------------------------------------------------------------------------|--------------|-------------------------------|---|--------------|----|-------------------------------------------------------------------------------------------|-------------------------|--|---------------------------|
| MS037 | Bulgaria-CentralRhodope<br>Bulgaria-EastRhodopeRegion<br>Bulgaria-WestRhodopeRegion<br>France-Alpes<br>France-Vosges<br>Italy-Sardinia<br>Spain-Baleares<br>Türkiye-Central<br>Türkiye-CentralTaurusRegion                   |              | Spain-Almeria<br>Spain-Murcia | 4 | Mesozoic age | 1a | Bulgaria-CentralRhodope<br>Spain-Baleares                                                 | Bulgaria-CentralRhodope |  | Bulgarian Rhodope regions |
| MS043 | Bulgaria-CentralRhodope<br>Bulgaria-EastRhodopeRegion<br>Bulgaria-WestRhodopeRegion<br>France-Alpes<br>France-Vosges<br>Greece-Siphnos<br>Italy-Sardinia<br>Spain-Baleares<br>Türkiye-Central<br>Türkiye-CentralTaurusRegion | Spain-Murcia | Spain-Almeria<br>Spain-Murcia | 4 | Mesozoic age | 1a | Bulgaria-CentralRhodope<br>Bulgaria-EastRhodopeRegion<br>Greece-Siphnos<br>Spain-Baleares | Bulgaria-CentralRhodope |  | Bulgarian Rhodope regions |
| MS047 | Bulgaria-CentralRhodope<br>Bulgaria-EastRhodopeRegion<br>Bulgaria-WestRhodopeRegion<br>France-Alpes<br>France-Vosges<br>Italy-Sardinia<br>Spain-Baleares<br>Türkiye-Central<br>Türkiye-CentralTaurusRegion                   | Spain-Murcia | Spain-Murcia                  | 4 | Mesozoic age | 1a | Bulgaria-CentralRhodope<br>Spain-Baleares                                                 | Spain-Baleares          |  | Bulgarian Rhodope regions |

|                  |                                                                                                                                                                                                             |                     |                                                          |   |                       |    |                                           |                |  |                           |
|------------------|-------------------------------------------------------------------------------------------------------------------------------------------------------------------------------------------------------------|---------------------|----------------------------------------------------------|---|-----------------------|----|-------------------------------------------|----------------|--|---------------------------|
| MS049            | Bulgaria-CentralRhodope<br>Bulgaria-EastRhodopeRegion<br>Bulgaria-WestRhodopeRegion<br>France-Alpes<br>Greece-Siphnos<br>Italy-Sardinia<br>Spain-Baleares<br>Türkiye-Central<br>Türkiye-CentralTaurusRegion | Spain-Murcia        | Spain-Murcia                                             | 4 | Mesozoic age          | 1a | Bulgaria-CentralRhodope<br>Spain-Baleares | Spain-Baleares |  | Bulgarian Rhodope regions |
| R90              | Britain-N.Pennines(Durham)<br>Bulgaria-CentralRhodope<br>Bulgaria-EastRhodopeRegion<br>Bulgaria-WestRhodopeRegion<br>France-Alpes<br>Spain-Baleares<br>Türkiye-Central<br>Türkiye-CentralTaurusRegion       |                     | Spain-Murcia                                             | 3 | mixed and/or recycled | 1a | Bulgaria-CentralRhodope<br>Spain-Baleares | Spain-Baleares |  | Bulgarian Rhodope regions |
| 16-Denarius-60-1 | Britain-N.Pennines(Durham)<br>Bulgaria-CentralRhodope<br>France-Alpes<br>France-MassifCentral<br>Germany-Schwarzwald<br>Spain-Gipuzkoa                                                                      | Germany-Schwarzwald | Bulgaria-WestRhodopeRegion<br>Germany-Schwarzwald        | 6 | mixed and/or recycled | 1b | Bulgaria-BurgasRegion<br>Spain-Gipuzkoa   | Spain-Gipuzkoa |  | Spain-Gipuzkoa            |
| 18-Denarius-58-2 | Bulgaria-BurgasRegion<br>Bulgaria-CentralRhodope<br>Germany-Schwarzwald<br>Türkiye-Central<br>Türkiye-East                                                                                                  |                     | Egypt-EastofNile<br>France-Vosges<br>Germany-Schwarzwald | 6 | mixed and/or recycled | 1b | Bulgaria-BurgasRegion<br>Spain-Gipuzkoa   | Spain-Gipuzkoa |  | Spain-Gipuzkoa            |
| 21-Janus-29-3    | Britain-N.Pennines(Durham)<br>Germany-Schwarzwald<br>Spain-Gipuzkoa<br>Türkiye-Central                                                                                                                      |                     |                                                          | 6 | mixed and/or recycled | 1b | Spain-Gipuzkoa                            | Spain-Gipuzkoa |  | Spain-Gipuzkoa            |

|                   |                                                                                                                                                                                                 |                                                                       |                                                                       |   |                       |    |                |                |  |                |
|-------------------|-------------------------------------------------------------------------------------------------------------------------------------------------------------------------------------------------|-----------------------------------------------------------------------|-----------------------------------------------------------------------|---|-----------------------|----|----------------|----------------|--|----------------|
| 24-Quinarius-44-6 | France-Alpes<br>Germany-Schwarzwald<br>Spain-Gipuzkoa<br>Türkiye-Central                                                                                                                        |                                                                       | Germany-Schwarzwald                                                   | 6 | mixed and/or recycled | 1b |                |                |  | Spain-Gipuzkoa |
| 2-Dioscuri-139-1  | France-Alpes<br>France-MassifCentral<br>Germany-Schwarzwald<br>Iran-CentralIran<br>Spain-Gipuzkoa                                                                                               | Bulgaria-WestRhodopeRegion<br>Germany-Schwarzwald<br>Iran-CentralIran | Bulgaria-WestRhodopeRegion<br>Germany-Schwarzwald<br>Iran-CentralIran | 6 | mixed and/or recycled | 1b | Spain-Gipuzkoa | Spain-Gipuzkoa |  | Spain-Gipuzkoa |
| 9-Denarius-Maiana | Britain-N.Pennines(Durham)<br>Bulgaria-WestRhodopeRegion<br>France-Alpes<br>France-MassifCentral<br>Germany-Schwarzwald<br>Spain-Gipuzkoa                                                       | Bulgaria-WestRhodopeRegion                                            | Bulgaria-WestRhodopeRegion                                            | 4 | Mesozoic age          | 1b | Spain-Gipuzkoa | Spain-Gipuzkoa |  | mixed/recycled |
| MS013             | Bulgaria-WestRhodopeRegion<br>France-Alpes<br>Italy-Sardinia<br>Spain-Gipuzkoa<br>Türkiye-East                                                                                                  |                                                                       | Spain-Baleares                                                        | 4 | Mesozoic age          | 1b |                |                |  | mixed/recycled |
| MS016             | Britain-N.Pennines(Durham)<br>Bulgaria-WestRhodopeRegion<br>France-Alpes<br>France-MassifCentral<br>Italy-Sardinia<br>Portugal<br>Spain-Gipuzkoa<br>Türkiye-East                                |                                                                       | Bulgaria-WestRhodopeRegion<br>France-Alpes                            | 4 | Mesozoic age          | 1b |                |                |  | mixed/recycled |
| MS017             | Britain-N.Pennines(Durham)<br>Bulgaria-WestRhodopeRegion<br>France-Alpes<br>France-MassifCentral<br>Germany-Harz<br>Germany-Schwarzwald<br>Iran-CentralIran<br>Italy-Sardinia<br>Spain-Baleares |                                                                       | Spain-Baleares                                                        | 3 | mixed and/or recycled | 1b | Spain-Gipuzkoa | Spain-Gipuzkoa |  | mixed/recycled |



|       |                                                                                                                                                                                             |  |                                                       |   |                          |    |                |                |  |                |
|-------|---------------------------------------------------------------------------------------------------------------------------------------------------------------------------------------------|--|-------------------------------------------------------|---|--------------------------|----|----------------|----------------|--|----------------|
| MS019 | Britain-<br>N.Pennines(Durham)<br>Bulgaria-<br>WestRhodopeRegion<br>France-Alpes<br>Iran-CentralIran<br>Italy-Sardinia<br>Spain-Baleares                                                    |  | Spain-Baleares                                        | 3 | mixed and/or<br>recycled | 1b |                |                |  | mixed/recycled |
| MS024 | Britain-<br>N.Pennines(Durham)<br>Bulgaria-<br>WestRhodopeRegion<br>France-Alpes<br>France-<br>MassifCentral<br>Germany-<br>Schwarzwald<br>Italy-Sardinia<br>Spain-Gipuzkoa<br>Türkiye-East |  | Bulgaria-<br>WestRhodopeRegion                        | 4 | Mesozoic age             | 1b |                |                |  | mixed/recycled |
| MS025 | Britain-<br>N.Pennines(Durham)<br>Bulgaria-<br>WestRhodopeRegion<br>France-Alpes<br>France-<br>MassifCentral<br>Iran-CentralIran<br>Italy-Sardinia<br>Spain-Baleares                        |  | Spain-Baleares                                        | 3 | mixed and/or<br>recycled | 1b | Spain-Gipuzkoa | Spain-Gipuzkoa |  | mixed/recycled |
| MS026 | Britain-<br>N.Pennines(Durham)<br>Bulgaria-<br>WestRhodopeRegion<br>France-Alpes<br>France-<br>MassifCentral<br>Germany-<br>Schwarzwald<br>Italy-Sardinia<br>Spain-Gipuzkoa<br>Türkiye-East |  | Bulgaria-<br>WestRhodopeRegion                        | 4 | Mesozoic age             | 1b | Spain-Gipuzkoa | Spain-Gipuzkoa |  | mixed/recycled |
| MS029 | Britain-<br>N.Pennines(Durham)<br>France-Alpes<br>France-<br>MassifCentral<br>Germany-Harz<br>Italy-Sardinia<br>Portugal<br>Spain-Gipuzkoa<br>Türkiye-East                                  |  | France-Alpes<br>Germany-Schwarzwald<br>Spain-Baleares | 3 | mixed and/or<br>recycled | 1b | Spain-Gipuzkoa | Spain-Gipuzkoa |  | mixed/recycled |

|                    |                                                                                                                                                                                             |  |                                |   |                          |    |                                                                                                                                            |                     |  |                                                              |
|--------------------|---------------------------------------------------------------------------------------------------------------------------------------------------------------------------------------------|--|--------------------------------|---|--------------------------|----|--------------------------------------------------------------------------------------------------------------------------------------------|---------------------|--|--------------------------------------------------------------|
| MS033              | Britain-<br>N.Pennines(Durham)<br>Bulgaria-<br>WestRhodopeRegion<br>France-Alpes<br>France-<br>MassifCentral<br>Germany-<br>Schwarzwald<br>Italy-Sardinia<br>Spain-Gipuzkoa<br>Türkiye-East |  | Bulgaria-<br>WestRhodopeRegion | 4 | Mesozoic age             | 1b |                                                                                                                                            |                     |  | mixed/recycled                                               |
| MS045              | Britain-<br>N.Pennines(Durham)<br>Bulgaria-<br>WestRhodopeRegion<br>France-Alpes<br>France-<br>MassifCentral<br>Germany-<br>Schwarzwald<br>Italy-Sardinia<br>Spain-Gipuzkoa<br>Türkiye-East |  | Bulgaria-<br>WestRhodopeRegion | 4 | Mesozoic age             | 1b |                                                                                                                                            |                     |  | mixed/recycled                                               |
| 10-Denarius-53-2   | Britain-<br>N.Pennines(Durham)<br>Bulgaria-<br>BurgasRegion<br>Bulgaria-<br>WestRhodopeRegion<br>France-<br>MassifCentral<br>Germany-<br>Schwarzwald<br>Iran-CentralIran                    |  | Egypt-EastofNile               | 6 | mixed and/or<br>recycled | 2  | Germany-Schwarzwald                                                                                                                        | Germany-Schwarzwald |  | Germany-Schwarzwald                                          |
| 19-Denarius-112-2a | Britain-<br>AlderleyEdge(Cheshire)<br>Britain-<br>N.Pennines(Durham)                                                                                                                        |  | Egypt-EastofNile               | 6 | mixed and/or<br>recycled | 2  | Britain-<br>AlderleyEdge(Cheshire)<br>Britain-<br>N.Pennines(Durham)<br>France-MassifCentral-<br>MNC<br>Germany-Harz<br>Germany-Siegerland | Germany-Siegerland  |  | Britain-AlderleyEdge(Cheshire)<br>Britain-N.Pennines(Durham) |

|                     |                                                                                                                                                                                                                                                                    |                           |                                                            |   |                   |    |                             |                      |  |                                      |
|---------------------|--------------------------------------------------------------------------------------------------------------------------------------------------------------------------------------------------------------------------------------------------------------------|---------------------------|------------------------------------------------------------|---|-------------------|----|-----------------------------|----------------------|--|--------------------------------------|
| MS042               | Britain-CentralWales(Dyfed)<br>Britain-NW.Wales(Gwynedd)<br>France<br>France-Alpes<br>France-Armorique<br>France-MassifCentral<br>France-Vosges<br>Germany-Eifel<br>Germany-Harz<br>Italy-Sardinia<br>Portugal<br>Spain-Ciudad Real<br>Spain-Córdoba<br>Spain-Jaén | France-MassifCentral      | Egypt-EastofNile<br>France-MassifCentral<br>Spain-Jaén     | 1 | Hercynian orogeny | 2  | France-MassifCentral        | France-MassifCentral |  | France-MassifCentral                 |
| MS056               | France-Armorique<br>Italy-Sardinia<br>Italy-Sardinia-Iglesiente<br>Spain-Ciudad Real<br>Spain-Jaén<br>Türkiye-East                                                                                                                                                 | Italy-Sardinia-Iglesiente | Italy-Sardinia-Iglesiente<br>Spain-Badajoz<br>Spain-Huelva | 5 | Hercynian orogeny | 2a | France-Armorique            | France-Armorique     |  | France-Armorique                     |
| 17-Quadrigatus-28-3 | Britain-AlderlyEdge(Cheshire)<br>Britain-CentralWales(Dyfed)<br>Britain-N.Pennines(Durham)<br>France-MassifCentral<br>Germany-Harz<br>Germany-Schwarzwald<br>Spain-Ciudad Real<br>Spain-Córdoba<br>Spain-Gipuzkoa<br>Spain-Jaén                                    |                           | Britain-N.Pennines(Durham)<br>Egypt-EastofNile             | 1 | Hercynian orogeny | 2b | France-Gard<br>Germany-Harz | France-Gard          |  | Portugal, France, Britain or Germany |

|                   |                                                                                                                                                                                                                                                                                                          |                            |                                                |   |                   |    |                                         |             |  |                                      |
|-------------------|----------------------------------------------------------------------------------------------------------------------------------------------------------------------------------------------------------------------------------------------------------------------------------------------------------|----------------------------|------------------------------------------------|---|-------------------|----|-----------------------------------------|-------------|--|--------------------------------------|
| 7-Denarius-Marcia | Britain-AlderlyEdge(Cheshire)<br>Britain-Mendpins-Bristol(A&S)<br>Britain-N.Pennines(Durham)<br>Britain-S.Pennines(Derbyshire)<br>France-Alpes<br>France-Armorique<br>France-MassifCentral<br>Germany-Harz<br>Germany-Schwarzwald                                                                        | Britain-N.Pennines(Durham) | Britain-N.Pennines(Durham)<br>Egypt-EastofNile | 1 | Hercynian orogeny | 2b | France-Gard<br>Germany-Harz<br>Portugal | France-Gard |  | Portugal, France, Britain or Germany |
| DE003             | Britain-AlderlyEdge(Cheshire)<br>Britain-Cornwall<br>Britain-Mendpins-Bristol(A&S)<br>Britain-N.Pennines(Durham)<br>France-Armorique<br>France-Gard<br>France-MassifCentral<br>Germany-Eifel<br>Portugal<br>Spain-Ciudad Real<br>Spain-Jaén                                                              |                            | Egypt-EastofNile                               | 1 | Hercynian orogeny | 2b | Britain-N.Pennines(Durham)<br>Portugal  | Portugal    |  | Portugal, France, Britain or Germany |
| MS027             | Britain-AlderlyEdge(Cheshire)<br>Britain-CentralWales(Dyfed)<br>Britain-N.Pennines(Durham)<br>Britain-S.Pennines(Derbyshire)<br>France-Alpes<br>France-Armorique<br>France-MassifCentral<br>Germany-Harz<br>Germany-Schwarzwald<br>Iran-CentralIran<br>Spain-Ciudad Real<br>Spain-Gipuzkoa<br>Spain-Jaén |                            | Egypt-EastofNile                               | 1 | Hercynian orogeny | 2b |                                         |             |  | Portugal, France, Britain or Germany |

|       |                                                                                                                                                                                                                                                                                                                            |  |                            |   |                   |    |                         |             |  |                                      |
|-------|----------------------------------------------------------------------------------------------------------------------------------------------------------------------------------------------------------------------------------------------------------------------------------------------------------------------------|--|----------------------------|---|-------------------|----|-------------------------|-------------|--|--------------------------------------|
| MS039 | Britain-AlderlyEdge(Cheshire)<br>Britain-CentralWales(Dyfed)<br>Britain-N.Pennines(Durham)<br>Britain-NW.Wales(Gwynedd)<br>France-Alpes<br>France-Armorique<br>France-MassifCentral<br>Germany-Harz<br>Germany-Schwarzwald<br>Iran-CentralIran<br>Portugal<br>Spain-Gipuzkoa<br>Spain-Jaén<br>Türkiye-East<br>Türkiye-West |  | Britain-N.Pennines(Durham) | 1 | Hercynian orogeny | 2b | France-Gard<br>Portugal | France-Gard |  | Portugal, France, Britain or Germany |
| MS046 | Britain-AlderlyEdge(Cheshire)<br>Britain-Cornwall<br>Britain-Mendpins-Bristol(A&S)<br>Britain-N.Pennines(Durham)<br>France-Armorique<br>France-Gard<br>France-MassifCentral<br>Germany-Elfe<br>Germany-Harz<br>Spain-Badajoz<br>Spain-Ciudad Real<br>Spain-Jaén                                                            |  | Egypt-EastofNile           | 1 | Hercynian orogeny | 2b | Portugal                | Portugal    |  | Portugal, France, Britain or Germany |



|       |                                                                                                                                                                                                                                                                                                              |  |                                                |   |                   |    |                         |             |  |                                      |
|-------|--------------------------------------------------------------------------------------------------------------------------------------------------------------------------------------------------------------------------------------------------------------------------------------------------------------|--|------------------------------------------------|---|-------------------|----|-------------------------|-------------|--|--------------------------------------|
| MS050 | Britain-CentralWales(Dyfed)<br>Britain-N.Pennines(Durham)<br>Britain-S.Pennines(Derbys h)<br>France-Gard<br>France-MassifCentral<br>France-Vosges<br>Germany-Harz<br>Germany-Schwarzwald<br>Portugal<br>Spain-Ciudad Real<br>Spain-Córdoba<br>Spain-Jaén<br>Türkiye-East                                     |  | Egypt-EastofNile<br>Spain-Jaén                 | 1 | Hercynian orogeny | 2b | Portugal                | Portugal    |  | Portugal, France, Britain or Germany |
| MS053 | Britain-AlderlyEdge(Cheshire)<br>Britain-CentralWales(Dyfed)<br>Britain-N.Pennines(Durham)<br>Britain-S.Pennines(Derbys h)<br>France-Alpes<br>France-Gard<br>France-MassifCentral<br>France-Vosges<br>Germany-Harz<br>Germany-Schwarzwald<br>Spain-Ciudad Real<br>Spain-Jaén<br>Türkiye-East<br>Türkiye-West |  | Britain-N.Pennines(Durham)<br>Egypt-EastofNile | 1 | Hercynian orogeny | 2b | France-Gard<br>Portugal | France-Gard |  | Portugal, France, Britain or Germany |

|       |                                                                                                                                                                                                                                                                                                                                                                                                                                                                         |  |                  |   |                       |    |                                          |                  |  |                                      |
|-------|-------------------------------------------------------------------------------------------------------------------------------------------------------------------------------------------------------------------------------------------------------------------------------------------------------------------------------------------------------------------------------------------------------------------------------------------------------------------------|--|------------------|---|-----------------------|----|------------------------------------------|------------------|--|--------------------------------------|
| MS060 | Britain-AlderlyEdge(Cheshire)<br>Britain-Cornwall<br>Britain-Mendpins-Bristol(A&S)<br>Britain-N.Pennines(Durham)<br>France-Armorique<br>France-MassifCentral<br>Germany-Eifel<br>Germany-Harz<br>Germany-Hunsrück<br>Spain-Badajoz<br>Spain-Ciudad Real<br>Spain-Córdoba<br>Spain-Jaén                                                                                                                                                                                  |  | Egypt-EastofNile | 1 | Hercynian orogeny     | 2b | Britain-Cornwall<br>France-MassifCentral | Britain-Cornwall |  | Portugal, France, Britain or Germany |
| MS061 | Britain-CentralWales(Dyfed)<br>Britain-Cornwall<br>Britain-Mendpins-Bristol(A&S)<br>Britain-N.Pennines(Durham)<br>Britain-NW.Wales(Gwynedd)<br>Britain-S.Pennines(Derbyshire)<br>Bulgaria-NorthwestRegion<br>Bulgaria-WestRhodopeRegion<br>France-Alpes<br>France-Armorique<br>France-Gard<br>France-MassifCentral<br>France-Pontgibaud<br>Germany-Eifel<br>Germany-Harz<br>Italy-Sardinia<br>Portugal<br>Spain-Almeria<br>Spain-Baleares<br>Spain-Jaén<br>Türkiye-East |  | Portugal         | 3 | mixed and/or recycled | 2b | France-Gard<br>Portugal                  | France-Gard      |  | Portugal, France, Britain or Germany |

|                  |                                                                                                                                                                                                                                                                                             |  |                              |   |                |   |                                                                      |                   |                |                   |
|------------------|---------------------------------------------------------------------------------------------------------------------------------------------------------------------------------------------------------------------------------------------------------------------------------------------|--|------------------------------|---|----------------|---|----------------------------------------------------------------------|-------------------|----------------|-------------------|
| 23-Denarius-30-1 | Bulgaria-EastRhodopeRegion<br>Germany-Schwarzwald<br>Greece-Chalkidiki<br>Greece-Laurion<br>Greece-Thasos<br>Türkiye-Central<br>Türkiye-West                                                                                                                                                |  |                              | 2 | Baetic orogeny | 3 | Greece-Chalkidiki<br>Greece-Laurion<br>Greece-Thasos<br>Türkiye-West | Greece-Chalkidiki |                | Chalkidiki-Thasos |
| MS002            | France-Vosges<br>Greece-Chalkidiki<br>Greece-Laurion<br>Italy-Sardinia<br>Türkiye-Central<br>Türkiye-West                                                                                                                                                                                   |  |                              | 2 | Baetic orogeny | 3 | Greece-Chalkidiki<br>Greece-Laurion<br>Greece-Thasos<br>Türkiye-West | Greece-Thasos     | Greece-Laurion | Laurion           |
| MS005            | France-Vosges<br>Italy-Sardinia<br>Türkiye-Central<br>Türkiye-West                                                                                                                                                                                                                          |  |                              | 2 | Baetic orogeny | 3 | Greece-Chalkidiki<br>Greece-Laurion<br>Greece-Thasos<br>Türkiye-West | Greece-Chalkidiki |                | Chalkidiki-Thasos |
| MS006            | France-Vosges<br>Greece-Chalkidiki<br>Greece-Laurion<br>Italy-Sardinia<br>Türkiye-Central<br>Türkiye-West                                                                                                                                                                                   |  |                              | 2 | Baetic orogeny | 3 | Greece-Chalkidiki<br>Greece-Laurion<br>Greece-Thasos<br>Türkiye-West | Greece-Thasos     | Greece-Laurion | Laurion           |
| MS057            | Bulgaria-CentralRhodope<br>Bulgaria-EastRhodopeRegion<br>Bulgaria-WestRhodopeRegion<br>France-Alpes<br>France-Vosges<br>Germany-Schwarzwald<br>Greece-Chalkidiki<br>Greece-Siphnos<br>Greece-Thasos<br>Italy-Sardinia<br>Spain-Almeria<br>Spain-Baleares<br>Türkiye-Central<br>Türkiye-West |  | Spain-Murcia<br>Türkiye-West | 2 | Baetic orogeny | 3 | Greece-Chalkidiki<br>Greece-Thasos<br>Türkiye-West                   | Greece-Thasos     |                | Chalkidiki-Thasos |

|                  |                                                                                                                                                                                                                                                                                                                            |  |               |   |                       |    |                                                                      |                   |  |                   |
|------------------|----------------------------------------------------------------------------------------------------------------------------------------------------------------------------------------------------------------------------------------------------------------------------------------------------------------------------|--|---------------|---|-----------------------|----|----------------------------------------------------------------------|-------------------|--|-------------------|
| TB037            | Bulgaria-CentralRhodope<br>Bulgaria-EastRhodopeRegion<br>Bulgaria-WestRhodopeRegion<br>France-Alpes<br>France-Vosges<br>Germany-Schwarzwald<br>Greece-Chalkidiki<br>Greece-Laurion<br>Greece-Thasos<br>Italy-Sardinia<br>Spain-Almeria<br>Spain-Baleares<br>Türkiye-Central<br>Türkiye-CentralTaurusRegion<br>Türkiye-West |  |               | 2 | Baetic orogeny        | 3  | Greece-Chalkidiki<br>Greece-Laurion<br>Greece-Thasos<br>Türkiye-West | Greece-Thasos     |  | Chalkidiki-Thasos |
| TB039            | Bulgaria-EastRhodopeRegion<br>France-Alpes<br>France-Vosges<br>Germany-Schwarzwald<br>Greece-Chalkidiki<br>Greece-Kea<br>Greece-Laurion<br>Greece-Thasos<br>Greece-Thera<br>Italy-Sardinia<br>Spain-Almeria<br>Türkiye-Central<br>Türkiye-West                                                                             |  | Greece-Thasos | 2 | Baetic orogeny        | 3  | Greece-Chalkidiki<br>Greece-Laurion<br>Greece-Thasos<br>Türkiye-West | Greece-Chalkidiki |  | Chalkidiki-Thasos |
| 22-Denarius-44-5 | Bulgaria-CentralRhodope<br>Bulgaria-EastRhodopeRegion<br>France-Alpes<br>Germany-Schwarzwald<br>Greece-Siphnos<br>Türkiye-Central                                                                                                                                                                                          |  |               | 6 | mixed and/or recycled | 3a |                                                                      |                   |  | mixed/recycled    |

|                   |                                                                                                                                                                                                                                              |              |                               |   |                |    |                                                                                  |                   |  |                   |
|-------------------|----------------------------------------------------------------------------------------------------------------------------------------------------------------------------------------------------------------------------------------------|--------------|-------------------------------|---|----------------|----|----------------------------------------------------------------------------------|-------------------|--|-------------------|
| 12-Denarius-113-1 | Britain-N.Pennines(Durham)<br>Bulgaria-CentralRhodope<br>Bulgaria-EastRhodopeRegion<br>Bulgaria-WestRhodopeRegion<br>France-Vosges<br>Germany-Schwarzwald<br>Greece-Thasos<br>Türkiye-Central<br>Türkiye-CentralTaurusRegion<br>Türkiye-West | Türkiye-West | Spain-Murcia<br>Türkiye-West  | 2 | Baetic orogeny | 3b | Greece-Chalkidiki<br>Greece-Thasos<br>Türkiye-West                               | Greece-Chalkidiki |  | Chalkidiki-Thasos |
| 4-Quinarius-44-6  | Bulgaria-BurgasRegion<br>Bulgaria-CentralRhodope<br>Bulgaria-EastRhodopeRegion<br>France-Alpes<br>France-Vosges<br>Türkiye-Central<br>Türkiye-West                                                                                           |              | Türkiye-West                  | 2 | Baetic orogeny | 3b | Greece-Chalkidiki<br>Greece-Thasos<br>Türkiye-West                               | Greece-Chalkidiki |  | Chalkidiki-Thasos |
| MS003             | France-Vosges<br>Greece-Chalkidiki<br>Greece-Thasos<br>Italy-Sardinia<br>Türkiye-Central<br>Türkiye-West                                                                                                                                     |              | Greece-Thasos                 | 2 | Baetic orogeny | 3b | Greece-Chalkidiki<br>Greece-Thasos<br>Türkiye-West                               | Greece-Thasos     |  | Chalkidiki-Thasos |
| MS007             | Bulgaria-EastRhodopeRegion<br>Germany-Schwarzwald<br>Italy-Sardinia<br>Türkiye-Central<br>Türkiye-East                                                                                                                                       |              | Türkiye-West                  | 2 | Baetic orogeny | 3b | Greece-Chalkidiki<br>Greece-Thasos<br>Türkiye-West                               | Greece-Chalkidiki |  | Chalkidiki-Thasos |
| MS011             | Bulgaria-CentralRhodope<br>France-Vosges<br>Greece-Chalkidiki<br>Greece-Thasos<br>Italy-Sardinia<br>Türkiye-Central<br>Türkiye-West                                                                                                          |              | Greece-Thasos<br>Türkiye-West | 2 | Baetic orogeny | 3b | Bulgaria-EastRhodopeRegion<br>Greece-Chalkidiki<br>Greece-Thasos<br>Türkiye-West | Greece-Thasos     |  | Chalkidiki-Thasos |



|       |                                                                                                                                                                                                                                                                                               |              |                               |   |                |    |                                                                                  |                   |  |                   |
|-------|-----------------------------------------------------------------------------------------------------------------------------------------------------------------------------------------------------------------------------------------------------------------------------------------------|--------------|-------------------------------|---|----------------|----|----------------------------------------------------------------------------------|-------------------|--|-------------------|
| MS015 | Bulgaria-BurgasRegion<br>Bulgaria-CentralRhodope<br>Bulgaria-EastRhodopeRegion<br>Bulgaria-WestRhodopeRegion<br>France-Alpes<br>France-Vosges<br>Greece-Chalkidiki<br>Greece-Siphnos<br>Greece-Thasos<br>Italy-Sardinia<br>Spain-Almeria<br>Spain-Baleares<br>Türkiye-Central<br>Türkiye-West | Türkiye-West | Spain-Almeria<br>Türkiye-West | 2 | Baetic orogeny | 3b | Bulgaria-EastRhodopeRegion<br>Greece-Chalkidiki<br>Greece-Thasos<br>Türkiye-West | Greece-Chalkidiki |  | Chalkidiki-Thasos |
| GE056 | France-Vosges<br>Greece-Chalkidiki<br>Greece-Laurion<br>Italy-Sardinia<br>Türkiye-Central<br>Türkiye-West                                                                                                                                                                                     |              |                               | 2 | Baetic orogeny | 3c | Greece-Laurion<br>Türkiye-West                                                   | Greece-Laurion    |  | Laurion           |
| GE057 | Greece-Laurion<br>Türkiye-Central<br>Türkiye-West                                                                                                                                                                                                                                             |              |                               | 2 | Baetic orogeny | 3c | Greece-Laurion<br>Türkiye-West                                                   | Greece-Laurion    |  | Laurion           |
| MS004 | Greece-Laurion<br>Türkiye-Central<br>Türkiye-West                                                                                                                                                                                                                                             |              |                               | 2 | Baetic orogeny | 3c | Greece-Laurion                                                                   | Greece-Laurion    |  | Laurion           |
| MS008 | France-Vosges<br>Germany-Schwarzwald<br>Greece-Laurion<br>Türkiye-Central<br>Türkiye-CentralTaurusRegion<br>Türkiye-West                                                                                                                                                                      |              |                               | 2 | Baetic orogeny | 3c | Greece-Laurion                                                                   | Greece-Laurion    |  | Laurion           |
| TB038 | France-Vosges<br>Germany-Schwarzwald<br>Greece-Chalkidiki<br>Greece-Laurion<br>Greece-Thasos<br>Italy-Sardinia<br>Türkiye-Central<br>Türkiye-CentralTaurusRegion<br>Türkiye-West                                                                                                              |              | Greece-Laurion                | 2 | Baetic orogeny | 3c | Greece-Laurion                                                                   | Greece-Laurion    |  | Laurion           |

|                      |                                                                                                                                                                                                                                              |  |                                           |   |                       |    |                         |                         |  |                 |
|----------------------|----------------------------------------------------------------------------------------------------------------------------------------------------------------------------------------------------------------------------------------------|--|-------------------------------------------|---|-----------------------|----|-------------------------|-------------------------|--|-----------------|
| 14-Quinarius-97-2    | Britain-N.Pennines(Durham)<br>Bulgaria-CentralRhodope<br>Bulgaria-EastRhodopeRegion<br>Germany-Schwarzwald<br>Türkiye-Central<br>Türkiye-East<br>Türkiye-West                                                                                |  | Bulgaria-BurgasRegion<br>Egypt-EastofNile | 6 | mixed and/or recycled | 4a | Bulgaria-BurgasRegion   | Bulgaria-BurgasRegion   |  | Burgas          |
| 26-Victoriatus-102-1 | Britain-N.Pennines(Durham)<br>Bulgaria-CentralRhodope<br>Germany-Schwarzwald<br>Greece-Siphnos<br>Türkiye-Central<br>Türkiye-West                                                                                                            |  |                                           | 6 | mixed and/or recycled | 4a | Bulgaria-BurgasRegion   | Bulgaria-BurgasRegion   |  | Burgas          |
| 6-Victoriatus-98A-1a | Germany-Schwarzwald<br>Türkiye-Central                                                                                                                                                                                                       |  | Bulgaria-BurgasRegion                     | 6 | mixed and/or recycled | 4a | Bulgaria-BurgasRegion   | Bulgaria-BurgasRegion   |  | Burgas          |
| MS031                | Britain-N.Pennines(Durham)<br>Bulgaria-CentralRhodope<br>Bulgaria-EastRhodopeRegion<br>Bulgaria-WestRhodopeRegion<br>France-Alpes<br>Germany-Schwarzwald<br>Spain-Baleares<br>Türkiye-Central<br>Türkiye-CentralTaurusRegion<br>Türkiye-East |  | Spain-Almeria<br>Spain-Murcia             | 3 | mixed and/or recycled | 4b | Bulgaria-CentralRhodope | Bulgaria-CentralRhodope |  | Central Rhodope |

|                 |                                                                                                                                                                                                                                      |               |                                               |   |                |    |                            |                            |  |                 |
|-----------------|--------------------------------------------------------------------------------------------------------------------------------------------------------------------------------------------------------------------------------------|---------------|-----------------------------------------------|---|----------------|----|----------------------------|----------------------------|--|-----------------|
| MS044           | Bulgaria-CentralRhodope<br>Bulgaria-EastRhodopeRegion<br>Bulgaria-WestRhodopeRegion<br>France-Alpes<br>France-Vosges<br>Germany-Schwarzwald<br>Greece-Siphnos<br>Italy-Sardinia<br>Spain-Baleares<br>Türkiye-Central<br>Türkiye-East | Spain-Almeria | Spain-Almeria<br>Spain-Murcia                 | 4 | Mesozoic age   | 4b | Bulgaria-CentralRhodope    | Bulgaria-CentralRhodope    |  | Central Rhodope |
| 5-Denarius-53-2 | Bulgaria-CentralRhodope<br>Bulgaria-EastRhodopeRegion<br>Bulgaria-WestRhodopeRegion<br>France-Alpes<br>France-Vosges<br>Greece-Siphnos<br>Italy-Sardinia<br>Spain-Baleares<br>Türkiye-Central<br>Türkiye-West                        | Spain-Almeria | Spain-Almeria<br>Spain-Murcia<br>Türkiye-West | 2 | Baetic orogeny | 4c | Bulgaria-EastRhodopeRegion | Bulgaria-EastRhodopeRegion |  | East Rhodope    |
| MS032           | Bulgaria-CentralRhodope<br>Bulgaria-WestRhodopeRegion<br>France-Alpes<br>France-Vosges<br>Italy-Sardinia<br>Spain-Baleares<br>Türkiye-Central<br>Türkiye-East                                                                        |               | Spain-Almeria                                 | 4 | Mesozoic age   | 4d |                            |                            |  | West Rhodope    |
| MS048           | Bulgaria-CentralRhodope<br>Bulgaria-WestRhodopeRegion<br>France-Alpes<br>France-Vosges<br>Italy-Sardinia<br>Spain-Baleares<br>Türkiye-Central<br>Türkiye-East                                                                        | Spain-Almeria | Spain-Almeria                                 | 4 | Mesozoic age   | 4d | Bulgaria-WestRhodopeRegion | Bulgaria-WestRhodopeRegion |  | West Rhodope    |

|                  |                                                                                                                                                                                                                  |              |                                               |   |                       |   |                                                                                          |                            |                |                                                                                          |
|------------------|------------------------------------------------------------------------------------------------------------------------------------------------------------------------------------------------------------------|--------------|-----------------------------------------------|---|-----------------------|---|------------------------------------------------------------------------------------------|----------------------------|----------------|------------------------------------------------------------------------------------------|
| 1-Denarius-44-5  | Bulgaria-CentralRhodope<br>Bulgaria-EastRhodopeRegion<br>Bulgaria-WestRhodopeRegion<br>France-Alpes<br>France-Vosges<br>Germany-Schwarzwald<br>Greece-Siphnos<br>Spain-Almeria<br>Spain-Baleares<br>Türkiye-West | Türkiye-West | Spain-Almeria<br>Spain-Murcia<br>Türkiye-West | 2 | Baetic orogeny        | 5 | Bulgaria-EastRhodopeRegion<br>Greece-Siphnos<br>Türkiye-West                             | Bulgaria-EastRhodopeRegion |                | Türkiye, Greece or Spain                                                                 |
| 3-Victoriat-44-1 | France-Alpes<br>Türkiye-Central                                                                                                                                                                                  |              | Spain-Murcia                                  | 3 | mixed and/or recycled | 5 | Bulgaria-EastRhodopeRegion<br>Greece-Siphnos                                             | Bulgaria-EastRhodopeRegion | Greece-Siphnos | Siphnos                                                                                  |
| MS010            | Bulgaria-CentralRhodope<br>Bulgaria-WestRhodopeRegion<br>Germany-Schwarzwald<br>Spain-Murcia<br>Türkiye-Central<br>Türkiye-CentralTaurusRegion                                                                   | Spain-Murcia | Spain-Murcia                                  | 4 | Mesozoic age          | 5 | Bulgaria-CentralRhodope<br>Greece-Siphnos<br>Spain-Murcia<br>Türkiye-CentralTaurusRegion | Spain-Murcia               |                | Bulgaria-CentralRhodope<br>Greece-Siphnos<br>Spain-Murcia<br>Türkiye-CentralTaurusRegion |
| MS014            | Bulgaria-CentralRhodope<br>Bulgaria-EastRhodopeRegion<br>Bulgaria-WestRhodopeRegion<br>France-Alpes<br>France-Vosges<br>Greece-Siphnos<br>Türkiye-Central<br>Türkiye-West                                        | Türkiye-West | Spain-Almeria<br>Spain-Murcia<br>Türkiye-West | 2 | Baetic orogeny        | 5 | Bulgaria-CentralRhodope<br>Bulgaria-EastRhodopeRegion<br>Greece-Siphnos<br>Türkiye-West  | Bulgaria-EastRhodopeRegion |                | Bulgaria-CentralRhodope<br>Bulgaria-EastRhodopeRegion<br>Greece-Siphnos<br>Türkiye-West  |

|       |                                                                                                                                                                                                                                                                                     |              |              |   |              |   |                                                                                                           |                         |  |                                                                                                           |
|-------|-------------------------------------------------------------------------------------------------------------------------------------------------------------------------------------------------------------------------------------------------------------------------------------|--------------|--------------|---|--------------|---|-----------------------------------------------------------------------------------------------------------|-------------------------|--|-----------------------------------------------------------------------------------------------------------|
| MS034 | Bulgaria-CentralRhodope<br>Bulgaria-EastRhodopeRegion<br>Bulgaria-WestRhodopeRegion<br>France-Alpes<br>France-Vosges<br>Germany-Schwarzwald<br>Spain-Baleares<br>Spain-Murcia<br>Türkiye-Central<br>Türkiye-CentralTaurusRegion<br>Türkiye-West                                     | Spain-Murcia | Spain-Murcia | 4 | Mesozoic age | 5 | Bulgaria-CentralRhodope<br>Greece-Siphnos<br>Spain-Murcia<br>Türkiye-CentralTaurusRegion                  | Bulgaria-CentralRhodope |  | Bulgaria-CentralRhodope<br>Greece-Siphnos<br>Spain-Murcia<br>Türkiye-CentralTaurusRegion                  |
| MS035 | Bulgaria-CentralRhodope<br>Bulgaria-EastRhodopeRegion<br>Bulgaria-WestRhodopeRegion<br>France-Alpes<br>France-Vosges<br>Germany-Schwarzwald<br>Italy-Sardinia<br>Spain-Almeria<br>Spain-Murcia<br>Türkiye-Central<br>Türkiye-CentralTaurusRegion<br>Türkiye-East                    | Spain-Murcia | Spain-Murcia | 4 | Mesozoic age | 5 | Bulgaria-CentralRhodope<br>Greece-Siphnos<br>Spain-Almeria<br>Spain-Murcia<br>Türkiye-CentralTaurusRegion | Spain-Murcia            |  | Bulgaria-CentralRhodope<br>Greece-Siphnos<br>Spain-Almeria<br>Spain-Murcia<br>Türkiye-CentralTaurusRegion |
| MS055 | Bulgaria-CentralRhodope<br>Bulgaria-EastRhodopeRegion<br>Bulgaria-WestRhodopeRegion<br>France-Alpes<br>France-Vosges<br>Germany-Schwarzwald<br>Greece-Siphnos<br>Italy-Sardinia<br>Spain-Baleares<br>Türkiye-Central<br>Türkiye-CentralTaurusRegion<br>Türkiye-East<br>Türkiye-West | Spain-Murcia | Spain-Murcia | 4 | Mesozoic age | 5 | Bulgaria-CentralRhodope<br>Greece-Siphnos<br>Spain-Baleares                                               | Bulgaria-CentralRhodope |  | Bulgaria-CentralRhodope<br>Greece-Siphnos<br>Spain-Baleares                                               |



|       |                                                                                                                                                                                                                                                                                     |              |              |   |              |   |                                                                                            |                         |  |                                                                                            |
|-------|-------------------------------------------------------------------------------------------------------------------------------------------------------------------------------------------------------------------------------------------------------------------------------------|--------------|--------------|---|--------------|---|--------------------------------------------------------------------------------------------|-------------------------|--|--------------------------------------------------------------------------------------------|
| MS058 | Bulgaria-CentralRhodope<br>Bulgaria-EastRhodopeRegion<br>Bulgaria-WestRhodopeRegion<br>France-Alpes<br>France-Vosges<br>Germany-Schwarzwald<br>Spain-Baleares<br>Spain-Murcia<br>Türkiye-Central<br>Türkiye-CentralTaurusRegion<br>Türkiye-East                                     | Spain-Murcia | Spain-Murcia | 4 | Mesozoic age | 5 | Bulgaria-CentralRhodope<br>Greece-Siphnos<br>Türkiye-CentralTaurusRegion                   | Bulgaria-CentralRhodope |  | Bulgaria-CentralRhodope<br>Greece-Siphnos<br>Türkiye-CentralTaurusRegion                   |
| MS059 | Bulgaria-CentralRhodope<br>Bulgaria-EastRhodopeRegion<br>Bulgaria-WestRhodopeRegion<br>France-Alpes<br>France-Vosges<br>Germany-Schwarzwald<br>Greece-Siphnos<br>Italy-Sardinia<br>Spain-Baleares<br>Spain-Murcia<br>Türkiye-Central<br>Türkiye-CentralTaurusRegion<br>Türkiye-East | Spain-Murcia | Spain-Murcia | 4 | Mesozoic age | 5 | Bulgaria-CentralRhodope<br>Greece-Siphnos<br>Spain-Baleares<br>Türkiye-CentralTaurusRegion | Bulgaria-CentralRhodope |  | Bulgaria-CentralRhodope<br>Greece-Siphnos<br>Spain-Baleares<br>Türkiye-CentralTaurusRegion |
| MS062 | Bulgaria-CentralRhodope<br>Bulgaria-EastRhodopeRegion<br>Bulgaria-WestRhodopeRegion<br>France-Alpes<br>France-Vosges<br>Germany-Schwarzwald<br>Italy-Sardinia<br>Spain-Murcia<br>Türkiye-Central<br>Türkiye-CentralTaurusRegion<br>Türkiye-East                                     | Spain-Murcia | Spain-Murcia | 4 | Mesozoic age | 5 | Bulgaria-CentralRhodope<br>Greece-Siphnos<br>Spain-Murcia<br>Türkiye-CentralTaurusRegion   | Spain-Murcia            |  | Bulgaria-CentralRhodope<br>Greece-Siphnos<br>Spain-Murcia<br>Türkiye-CentralTaurusRegion   |

|       |                                                                                                                                                                                                                                                                                     |              |                              |   |                       |   |                                                                                                          |                            |                |                                                                                           |
|-------|-------------------------------------------------------------------------------------------------------------------------------------------------------------------------------------------------------------------------------------------------------------------------------------|--------------|------------------------------|---|-----------------------|---|----------------------------------------------------------------------------------------------------------|----------------------------|----------------|-------------------------------------------------------------------------------------------|
| MS063 | Bulgaria-CentralRhodope<br>Bulgaria-EastRhodopeRegion<br>Bulgaria-WestRhodopeRegion<br>France-Alpes<br>France-Vosges<br>Germany-Schwarzwald<br>Greece-Siphnos<br>Italy-Sardinia<br>Spain-Baleares<br>Türkiye-Central<br>Türkiye-CentralTaurusRegion<br>Türkiye-East<br>Türkiye-West | Spain-Murcia | Spain-Murcia<br>Türkiye-West | 4 | Mesozoic age          | 5 | Bulgaria-CentralRhodope<br>Bulgaria-EastRhodopeRegion<br>Greece-Siphnos<br>Spain-Baleares                | Bulgaria-EastRhodopeRegion |                | Bulgaria-CentralRhodope<br>Bulgaria-EastRhodopeRegion<br>Greece-Siphnos<br>Spain-Baleares |
| R136  | Bulgaria-CentralRhodope<br>Bulgaria-EastRhodopeRegion<br>Bulgaria-WestRhodopeRegion<br>France-Alpes<br>France-Vosges<br>Germany-Schwarzwald<br>Greece-Siphnos<br>Italy-Sardinia<br>Spain-Baleares<br>Türkiye-Central<br>Türkiye-CentralTaurusRegion<br>Türkiye-East<br>Türkiye-West | Spain-Murcia | Spain-Murcia                 | 4 | Mesozoic age          | 5 | Bulgaria-CentralRhodope<br>Bulgaria-EastRhodopeRegion<br>Greece-Siphnos<br>Spain-Baleares                | Bulgaria-CentralRhodope    |                | Bulgaria-CentralRhodope<br>Bulgaria-EastRhodopeRegion<br>Greece-Siphnos<br>Spain-Baleares |
| R82   | Bulgaria-WestRhodopeRegion<br>France-Alpes<br>Greece-Siphnos<br>Türkiye-Central<br>Türkiye-CentralTaurusRegion<br>Türkiye-East<br>Türkiye-West                                                                                                                                      |              | Spain-Murcia                 | 3 | mixed and/or recycled | 5 | Bulgaria-CentralRhodope<br>Bulgaria-EastRhodopeRegion<br>Greece-Siphnos<br>Greece-Thasos<br>Türkiye-West | Türkiye-West               | Greece-Siphnos | Greece-Siphnos                                                                            |

|       |                                                                                                                                                                        |              |                                 |   |                          |    |                   |                   |  |                   |
|-------|------------------------------------------------------------------------------------------------------------------------------------------------------------------------|--------------|---------------------------------|---|--------------------------|----|-------------------|-------------------|--|-------------------|
| MS041 | Britain-<br>N.Pennines(Durham)<br>France-Alpes<br>France-MassifCentral<br>Germany-Schwarzwald<br>Iran-CentrallIran<br>Italy-Sardinia<br>Spain-Gipuzkoa<br>Türkiye-East | France-Alpes | France-Alpes<br>Spain-Gipuzkoa  | 4 | Mesozoic age             | 6a | Iran-CentrallIran | Iran-CentrallIran |  | Iran-CentrallIran |
| MS051 | Britain-<br>N.Pennines(Durham)<br>France-Alpes<br>France-MassifCentral<br>Germany-Schwarzwald<br>Iran-CentrallIran<br>Italy-Sardinia<br>Spain-Gipuzkoa<br>Türkiye-East | France-Alpes | France-Alpes<br>Spain-Gipuzkoa  | 4 | Mesozoic age             | 6a | Iran-CentrallIran | Iran-CentrallIran |  | Iran-CentrallIran |
| MS020 | Britain-<br>N.Pennines(Durham)<br>Bulgaria-WestRhodopeRegion<br>France-Alpes<br>Germany-Schwarzwald<br>Iran-CentrallIran<br>Spain-Baleares<br>Türkiye-East             |              |                                 | 3 | mixed and/or<br>recycled | 6b |                   |                   |  | mixed/recycled    |
| MS036 | Britain-<br>N.Pennines(Durham)<br>Bulgaria-WestRhodopeRegion<br>France-Alpes<br>Germany-Schwarzwald<br>Italy-Sardinia<br>Spain-Baleares<br>Türkiye-East                |              | Spain-Almeria<br>Spain-Baleares | 4 | Mesozoic age             | 6b |                   |                   |  | mixed/recycled    |
| MS038 | Britain-<br>N.Pennines(Durham)<br>Bulgaria-WestRhodopeRegion<br>France-Alpes<br>Germany-Schwarzwald<br>Italy-Sardinia<br>Spain-Baleares<br>Türkiye-East                |              | Spain-Almeria<br>Spain-Baleares | 4 | Mesozoic age             | 6b |                   |                   |  | mixed/recycled    |

|                  |                                                                                                                                                                                             |               |                                 |   |                          |    |  |  |  |                |
|------------------|---------------------------------------------------------------------------------------------------------------------------------------------------------------------------------------------|---------------|---------------------------------|---|--------------------------|----|--|--|--|----------------|
| MS040            | Britain-<br>N.Pennines(Durham)<br>Bulgaria-<br>WestRhodopeRegion<br>France-Alpes<br>Germany-<br>Schwarzwald<br>Italy-Sardinia<br>Spain-Gipuzkoa<br>Türkiye-East                             |               | Spain-Almeria<br>Spain-Baleares | 4 | Mesozoic age             | 6b |  |  |  | mixed/recycled |
| MS052            | Britain-<br>N.Pennines(Durham)<br>Bulgaria-<br>WestRhodopeRegion<br>France-Alpes<br>France-<br>MassifCentral<br>Germany-<br>Schwarzwald<br>Italy-Sardinia<br>Spain-Gipuzkoa<br>Türkiye-East |               | Spain-Almeria                   | 4 | Mesozoic age             | 6b |  |  |  | mixed/recycled |
| 8-Denarius-80-1a | Bulgaria-<br>CentralRhodope<br>Bulgaria-<br>WestRhodopeRegion<br>France-Alpes<br>Italy-Sardinia<br>Spain-Gipuzkoa<br>Türkiye-Central                                                        | Spain-Almeria | Spain-Almeria<br>Spain-Baleares | 3 | mixed and/or<br>recycled | 6c |  |  |  | mixed/recycled |
| MS018            | Britain-<br>N.Pennines(Durham)<br>Bulgaria-<br>WestRhodopeRegion<br>France-Alpes<br>Iran-CentralIran<br>Türkiye-East                                                                        |               |                                 | 3 | mixed and/or<br>recycled | 6c |  |  |  | mixed/recycled |
| MS021            | Britain-<br>N.Pennines(Durham)<br>Bulgaria-<br>WestRhodopeRegion<br>France-Alpes<br>Germany-<br>Schwarzwald<br>Iran-CentralIran<br>Italy-Sardinia<br>Spain-Baleares<br>Türkiye-East         |               | Spain-Almeria<br>Spain-Baleares | 3 | mixed and/or<br>recycled | 6c |  |  |  | mixed/recycled |

|                          |                                                                                                                                                                                                                  |               |                                                |   |                          |    |  |  |  |                |
|--------------------------|------------------------------------------------------------------------------------------------------------------------------------------------------------------------------------------------------------------|---------------|------------------------------------------------|---|--------------------------|----|--|--|--|----------------|
| MS023                    | Britain-<br>N.Pennines(Durham)<br>Bulgaria-<br>WestRhodopeRegion<br>France-Alpes<br>Germany-<br>Schwarzwald<br>Iran-CentralIran<br>Spain-Balears<br>Türkiye-East                                                 |               | Spain-Almeria                                  | 3 | mixed and/or<br>recycled | 6c |  |  |  | mixed/recycled |
| MS028                    | Britain-<br>N.Pennines(Durham)<br>Bulgaria-<br>CentralRhodope<br>Bulgaria-<br>WestRhodopeRegion<br>France-Alpes<br>Germany-<br>Schwarzwald<br>Italy-Sardinia<br>Türkiye-Central<br>Türkiye-East                  | Spain-Almeria | Spain-Almeria                                  | 4 | Mesozoic age             | 6c |  |  |  | mixed/recycled |
| MS030                    | Britain-<br>N.Pennines(Durham)<br>Bulgaria-<br>CentralRhodope<br>Bulgaria-<br>WestRhodopeRegion<br>France-Alpes<br>Germany-<br>Schwarzwald<br>Italy-Sardinia<br>Spain-Balears<br>Türkiye-Central<br>Türkiye-East | Spain-Almeria | Spain-Almeria                                  | 4 | Mesozoic age             | 6c |  |  |  | mixed/recycled |
| 13-Denarius-197-<br>1a-b | Britain-<br>N.Pennines(Durham)<br>France-Alpes<br>France-<br>MassifCentral<br>Germany-Harz<br>Italy-Sardinia<br>Portugal                                                                                         | France-Alpes  | Bulgaria-<br>WestRhodopeRegion<br>France-Alpes | 3 | mixed and/or<br>recycled | 6d |  |  |  | mixed/recycled |
| MS009                    | Britain-<br>N.Pennines(Durham)<br>France-Alpes<br>France-<br>MassifCentral<br>Germany-Harz<br>Italy-Sardinia<br>Portugal<br>Spain-Gipuzkoa                                                                       |               |                                                | 3 | mixed and/or<br>recycled | 6d |  |  |  | mixed/recycled |



|       |                                                                                                                                                   |  |                                            |   |              |    |  |  |  |                |
|-------|---------------------------------------------------------------------------------------------------------------------------------------------------|--|--------------------------------------------|---|--------------|----|--|--|--|----------------|
| MS012 | Bulgaria-WestRhodopeRegion<br>France-Alpes<br>Italy-Sardinia<br>Türkiye-East                                                                      |  | Spain-Almeria                              | 4 | Mesozoic age | 6d |  |  |  | mixed/recycled |
| MS054 | Britain-N.Pennines(Durham)<br>France-Alpes<br>France-MassifCentral<br>Germany-Schwarzwald<br>Iran-CentralIran<br>Italy-Sardinia<br>Spain-Gipuzkoa |  | Bulgaria-WestRhodopeRegion<br>France-Alpes | 4 | Mesozoic age | 6d |  |  |  | mixed/recycled |
| R121  | Britain-N.Pennines(Durham)<br>France-Alpes<br>France-MassifCentral<br>Italy-Sardinia<br>Portugal<br>Spain-Gipuzkoa                                |  | France-Alpes                               | 4 | Mesozoic age | 6d |  |  |  | mixed/recycled |

## Appendix 6: KDEs

### Group1: Spain

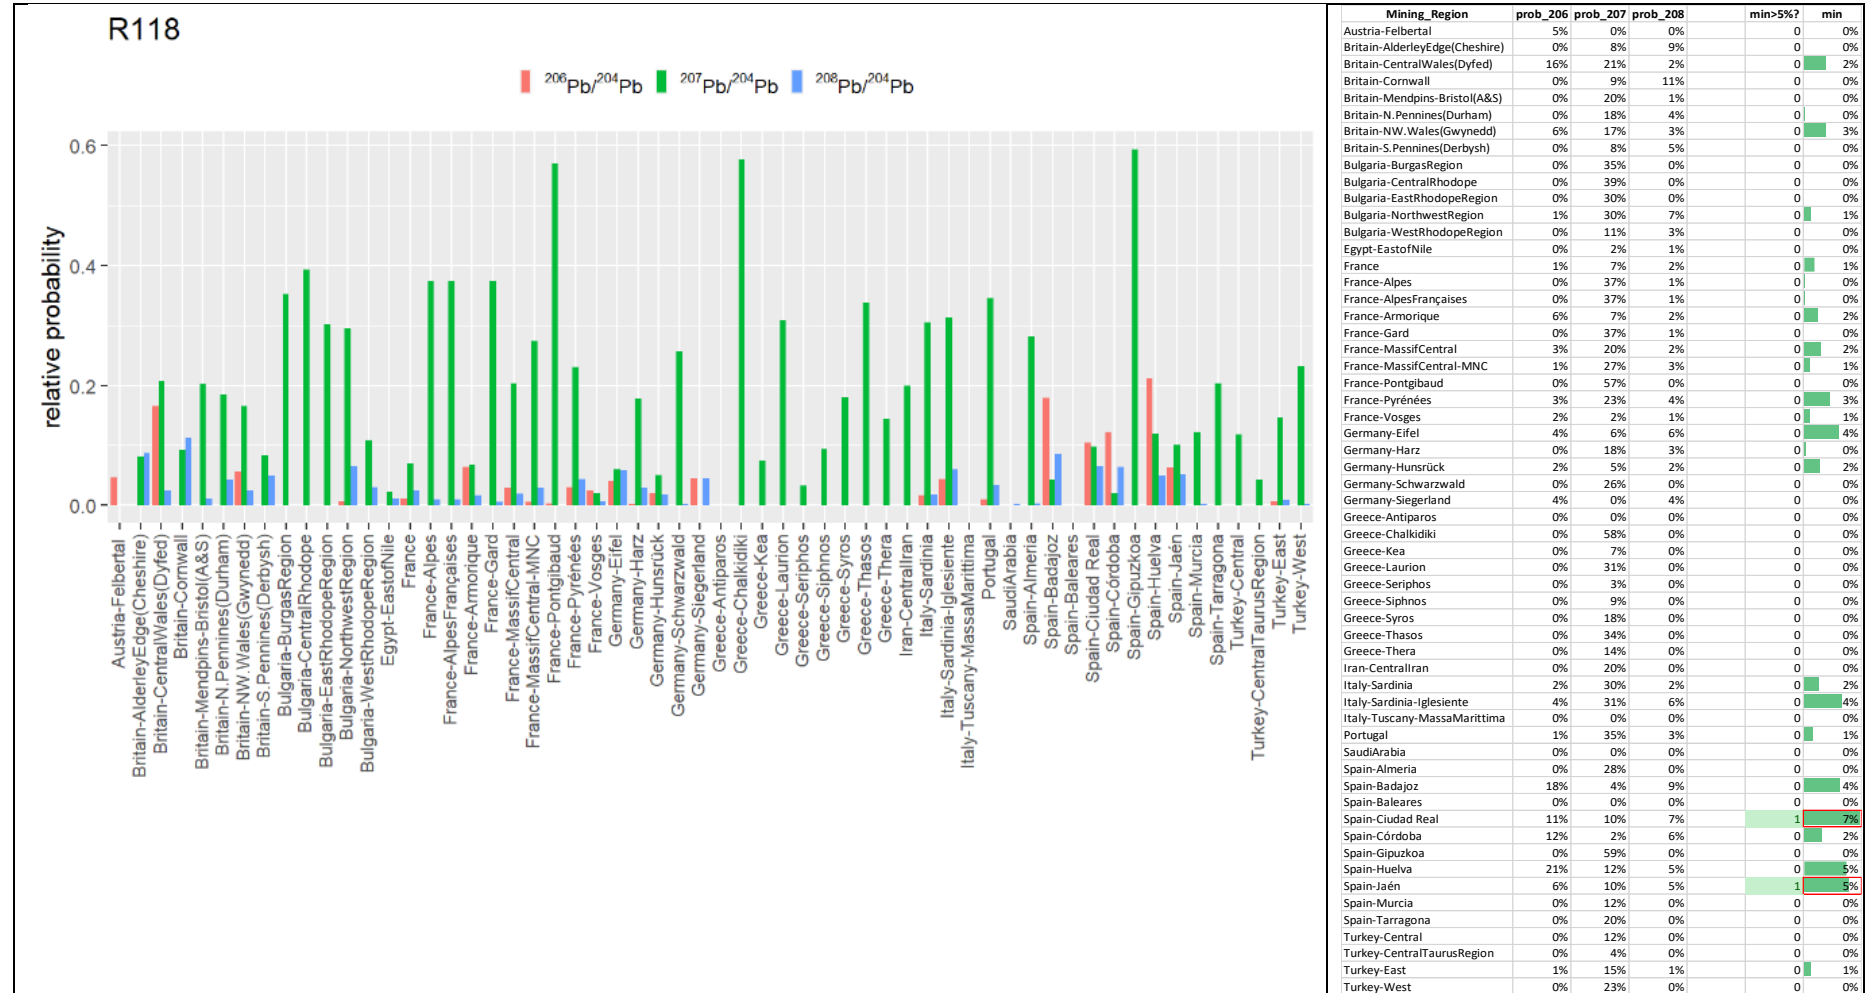

a. Balears

DE004

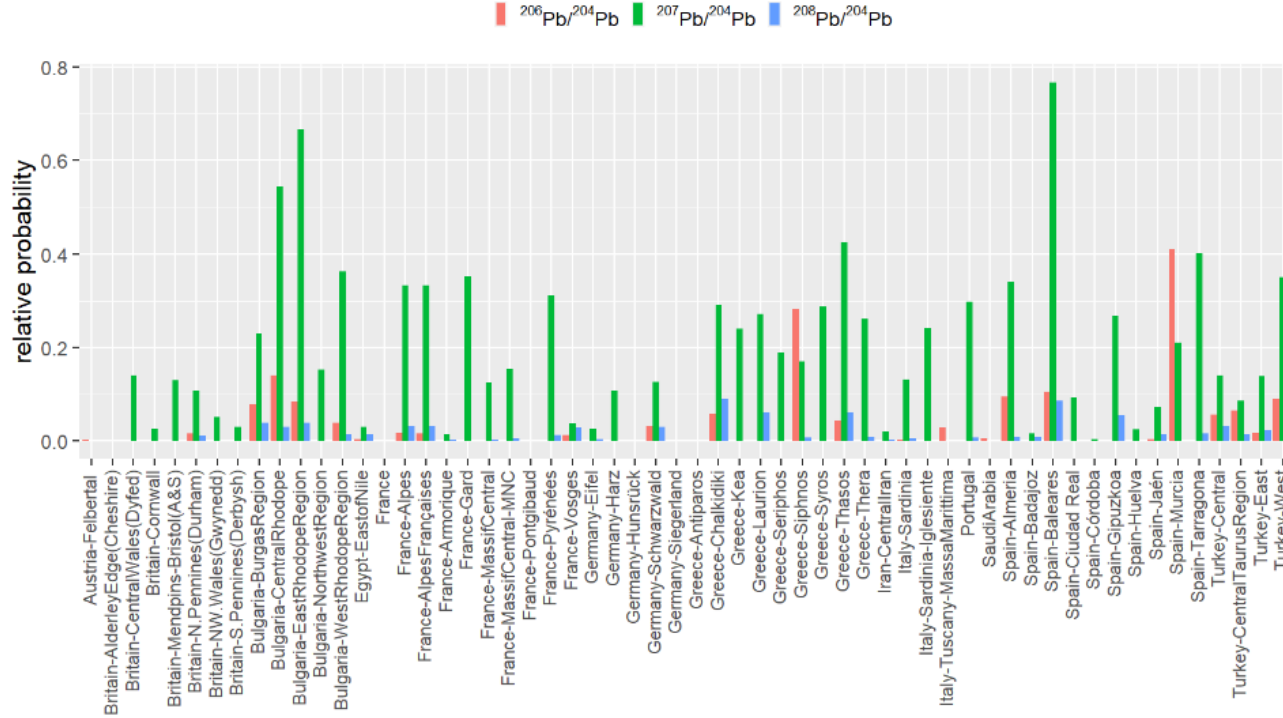

| Mining_Region                  | prob_206 | prob_207 | prob_208 | min>5%? | min |
|--------------------------------|----------|----------|----------|---------|-----|
| Austria-Felbertal              | 0%       | 0%       | 0%       | 0       | 0%  |
| Britain-AlderleyEdge(Cheshire) | 0%       | 0%       | 0%       | 0       | 0%  |
| Britain-CentralWales(Dyfed)    | 0%       | 14%      | 0%       | 0       | 0%  |
| Britain-Cornwall               | 0%       | 3%       | 0%       | 0       | 0%  |
| Britain-Mendips-Bristol(A&S)   | 0%       | 13%      | 0%       | 0       | 0%  |
| Britain-N.Pennines(Durham)     | 2%       | 11%      | 1%       | 0       | 1%  |
| Britain-NW.Wales(Gwynedd)      | 0%       | 5%       | 0%       | 0       | 0%  |
| Britain-S.Pennines(Derbysh)    | 0%       | 3%       | 0%       | 0       | 0%  |
| Bulgaria-BurgasRegion          | 8%       | 23%      | 4%       | 0       | 4%  |
| Bulgaria-CentralRhodope        | 14%      | 54%      | 3%       | 0       | 3%  |
| Bulgaria-EastRhodopeRegion     | 8%       | 67%      | 4%       | 0       | 4%  |
| Bulgaria-NorthwestRegion       | 0%       | 15%      | 0%       | 0       | 0%  |
| Bulgaria-WestRhodopeRegion     | 4%       | 36%      | 1%       | 0       | 1%  |
| Egypt-EastofNile               | 0%       | 3%       | 1%       | 0       | 0%  |
| France                         | 0%       | 0%       | 0%       | 0       | 0%  |
| France-Alpes                   | 2%       | 33%      | 3%       | 0       | 2%  |
| France-AlpesFrançaises         | 2%       | 33%      | 3%       | 0       | 2%  |
| France-Armorique               | 0%       | 1%       | 0%       | 0       | 0%  |
| France-Gard                    | 0%       | 35%      | 0%       | 0       | 0%  |
| France-MassifCentral           | 0%       | 12%      | 0%       | 0       | 0%  |
| France-MassifCentral-MNC       | 0%       | 15%      | 1%       | 0       | 0%  |
| France-Pontgibaud              | 0%       | 0%       | 0%       | 0       | 0%  |
| France-Pyrénées                | 0%       | 31%      | 1%       | 0       | 0%  |
| France-Vosges                  | 1%       | 4%       | 3%       | 0       | 1%  |
| Germany-Eifel                  | 0%       | 3%       | 0%       | 0       | 0%  |
| Germany-Harz                   | 0%       | 11%      | 0%       | 0       | 0%  |
| Germany-Hunsrück               | 0%       | 0%       | 0%       | 0       | 0%  |
| Germany-Schwarzwald            | 3%       | 13%      | 3%       | 0       | 3%  |
| Germany-Siegerland             | 0%       | 0%       | 0%       | 0       | 0%  |
| Greece-Antiparos               | 0%       | 0%       | 0%       | 0       | 0%  |
| Greece-Chalkidiki              | 6%       | 29%      | 9%       | 1       | 6%  |
| Greece-Kea                     | 0%       | 24%      | 0%       | 0       | 0%  |
| Greece-Laurion                 | 0%       | 27%      | 6%       | 0       | 0%  |
| Greece-Seriphos                | 0%       | 19%      | 0%       | 0       | 0%  |
| Greece-Siphnos                 | 28%      | 17%      | 1%       | 0       | 1%  |
| Greece-Syros                   | 0%       | 29%      | 0%       | 0       | 0%  |
| Greece-Thasos                  | 4%       | 43%      | 6%       | 0       | 4%  |
| Greece-Thera                   | 0%       | 26%      | 1%       | 0       | 0%  |
| Iran-CentralIran               | 0%       | 2%       | 0%       | 0       | 0%  |
| Italy-Sardinia-Iglesiente      | 0%       | 13%      | 1%       | 0       | 0%  |
| Italy-Tuscany-MassaMarittima   | 3%       | 0%       | 0%       | 0       | 0%  |
| Portugal                       | 0%       | 30%      | 1%       | 0       | 0%  |
| SaudiArabia                    | 1%       | 0%       | 0%       | 0       | 0%  |
| Spain-Almeria                  | 9%       | 34%      | 1%       | 0       | 1%  |
| Spain-Badajoz                  | 0%       | 2%       | 1%       | 0       | 0%  |
| Spain-Balears                  | 10%      | 77%      | 9%       | 1       | 9%  |
| Spain-Ciudad Real              | 0%       | 9%       | 0%       | 0       | 0%  |
| Spain-Córdoba                  | 0%       | 0%       | 0%       | 0       | 0%  |
| Spain-Gipuzkoa                 | 0%       | 27%      | 5%       | 0       | 0%  |
| Spain-Huelva                   | 0%       | 2%       | 0%       | 0       | 0%  |
| Spain-Jaén                     | 0%       | 7%       | 1%       | 0       | 0%  |
| Spain-Murcia                   | 41%      | 21%      | 0%       | 0       | 0%  |
| Spain-Tarragona                | 0%       | 40%      | 2%       | 0       | 0%  |
| Turkey-Central                 | 6%       | 14%      | 3%       | 0       | 3%  |
| Turkey-CentralTaurusRegion     | 6%       | 9%       | 1%       | 0       | 1%  |
| Turkey-East                    | 2%       | 14%      | 2%       | 0       | 2%  |
| Turkey-West                    | 9%       | 35%      | 4%       | 0       | 4%  |

# 11-Denarius-44-5

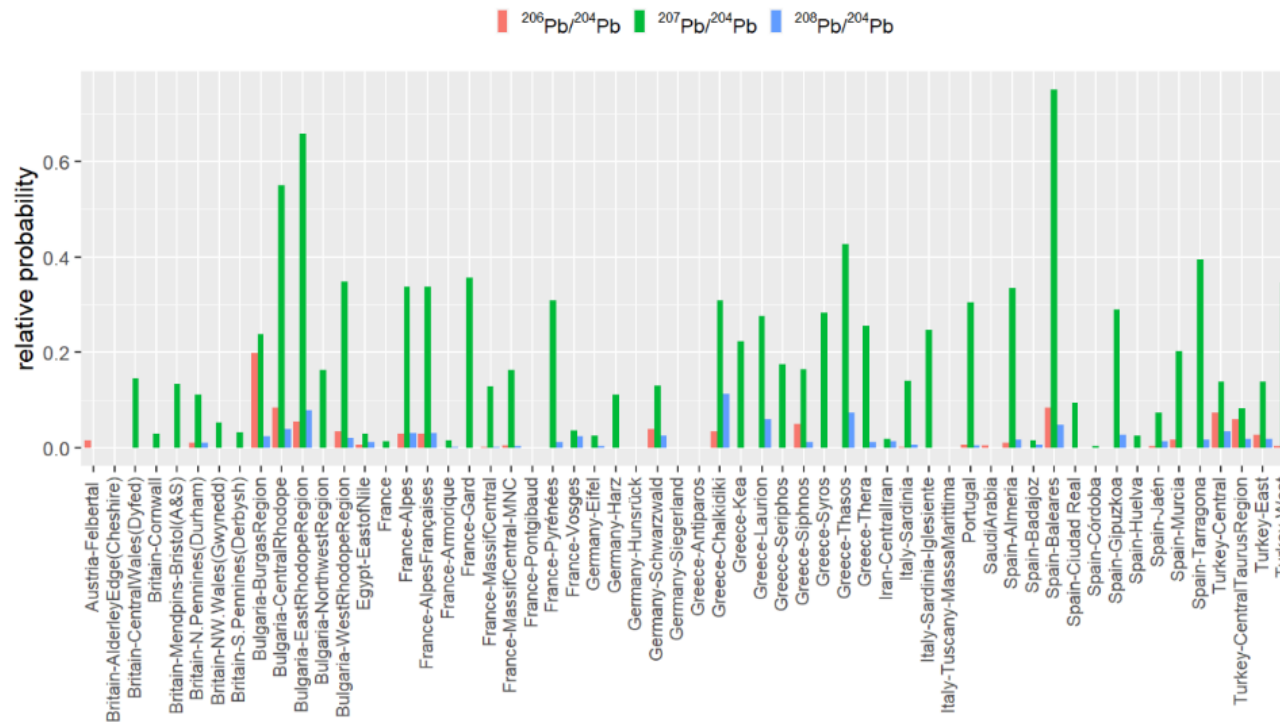

| Mining_Region                  | prob_206 | prob_207 | prob_208 | min>5%? | min |
|--------------------------------|----------|----------|----------|---------|-----|
| Austria-Felbertal              | 2%       | 0%       | 0%       | 0       | 0%  |
| Britain-AlderleyEdge(Cheshire) | 0%       | 0%       | 0%       | 0       | 0%  |
| Britain-CentralWales(Dyfed)    | 0%       | 15%      | 0%       | 0       | 0%  |
| Britain-Cornwall               | 0%       | 3%       | 0%       | 0       | 0%  |
| Britain-Mendips-Bristol(A&S)   | 0%       | 13%      | 0%       | 0       | 0%  |
| Britain-N. Pennines(Durham)    | 1%       | 11%      | 1%       | 0       | 1%  |
| Britain-NW. Wales(Gwynedd)     | 0%       | 5%       | 0%       | 0       | 0%  |
| Britain-S. Pennines(Derbysh)   | 0%       | 3%       | 0%       | 0       | 0%  |
| Bulgaria-BurgasRegion          | 20%      | 24%      | 2%       | 0       | 2%  |
| Bulgaria-CentralRhodope        | 8%       | 55%      | 4%       | 0       | 4%  |
| Bulgaria-EastRhodopeRegion     | 5%       | 66%      | 8%       | 1       | 5%  |
| Bulgaria-NorthwestRegion       | 0%       | 16%      | 0%       | 0       | 0%  |
| Bulgaria-WestRhodopeRegion     | 3%       | 35%      | 2%       | 0       | 2%  |
| Egypt-EastofNile               | 1%       | 3%       | 1%       | 0       | 1%  |
| France                         | 0%       | 1%       | 0%       | 0       | 0%  |
| France-Alpes                   | 3%       | 34%      | 3%       | 0       | 3%  |
| France-AlpesFrançaises         | 3%       | 34%      | 3%       | 0       | 3%  |
| France-Armorique               | 0%       | 2%       | 0%       | 0       | 0%  |
| France-Gard                    | 0%       | 36%      | 0%       | 0       | 0%  |
| France-MassifCentral           | 0%       | 13%      | 0%       | 0       | 0%  |
| France-MassifCentral-MNC       | 1%       | 16%      | 0%       | 0       | 0%  |
| France-Pontgibaud              | 0%       | 0%       | 0%       | 0       | 0%  |
| France-Pyrénées                | 0%       | 31%      | 1%       | 0       | 0%  |
| France-Vosges                  | 0%       | 4%       | 2%       | 0       | 0%  |
| Germany-Eifel                  | 0%       | 3%       | 0%       | 0       | 0%  |
| Germany-Harz                   | 0%       | 11%      | 0%       | 0       | 0%  |
| Germany-Hunsrück               | 0%       | 0%       | 0%       | 0       | 0%  |
| Germany-Schwarzwald            | 4%       | 13%      | 3%       | 0       | 3%  |
| Germany-Siegerland             | 0%       | 0%       | 0%       | 0       | 0%  |
| Greece-Antiparos               | 0%       | 0%       | 0%       | 0       | 0%  |
| Greece-Chalkidiki              | 3%       | 31%      | 11%      | 0       | 3%  |
| Greece-Kea                     | 0%       | 22%      | 0%       | 0       | 0%  |
| Greece-Laurion                 | 0%       | 28%      | 6%       | 0       | 0%  |
| Greece-Seriphos                | 0%       | 18%      | 0%       | 0       | 0%  |
| Greece-Siphnos                 | 5%       | 16%      | 1%       | 0       | 1%  |
| Greece-Syros                   | 0%       | 28%      | 0%       | 0       | 0%  |
| Greece-Thasos                  | 0%       | 43%      | 7%       | 0       | 0%  |
| Greece-Thera                   | 0%       | 26%      | 1%       | 0       | 0%  |
| Iran-Centrallran               | 0%       | 2%       | 1%       | 0       | 0%  |
| Italy-Sardinia-Iglesiente      | 0%       | 14%      | 1%       | 0       | 0%  |
| Italy-Sardinia-MassaMarittima  | 0%       | 25%      | 0%       | 0       | 0%  |
| Italy-Tuscany-MassaMarittima   | 0%       | 0%       | 0%       | 0       | 0%  |
| Portugal                       | 1%       | 31%      | 1%       | 0       | 1%  |
| SaudiArabia                    | 0%       | 0%       | 0%       | 0       | 0%  |
| Spain-Almeria                  | 1%       | 33%      | 2%       | 0       | 1%  |
| Spain-Badajoz                  | 0%       | 2%       | 1%       | 0       | 0%  |
| Spain-Baleares                 | 8%       | 75%      | 5%       | 0       | 5%  |
| Spain-Ciudad Real              | 0%       | 9%       | 0%       | 0       | 0%  |
| Spain-Córdoba                  | 0%       | 0%       | 0%       | 0       | 0%  |
| Spain-Gipuzkoa                 | 0%       | 29%      | 3%       | 0       | 0%  |
| Spain-Huelva                   | 0%       | 3%       | 0%       | 0       | 0%  |
| Spain-Jaén                     | 0%       | 7%       | 1%       | 0       | 0%  |
| Spain-Murcia                   | 2%       | 20%      | 0%       | 0       | 0%  |
| Spain-Tarragona                | 0%       | 39%      | 2%       | 0       | 0%  |
| Turkey-Central                 | 7%       | 14%      | 3%       | 0       | 3%  |
| Turkey-CentralTaurusRegion     | 6%       | 8%       | 2%       | 0       | 2%  |
| Turkey-East                    | 3%       | 14%      | 2%       | 0       | 2%  |
| Turkey-West                    | 0%       | 35%      | 5%       | 0       | 0%  |

15-Janus-29-3

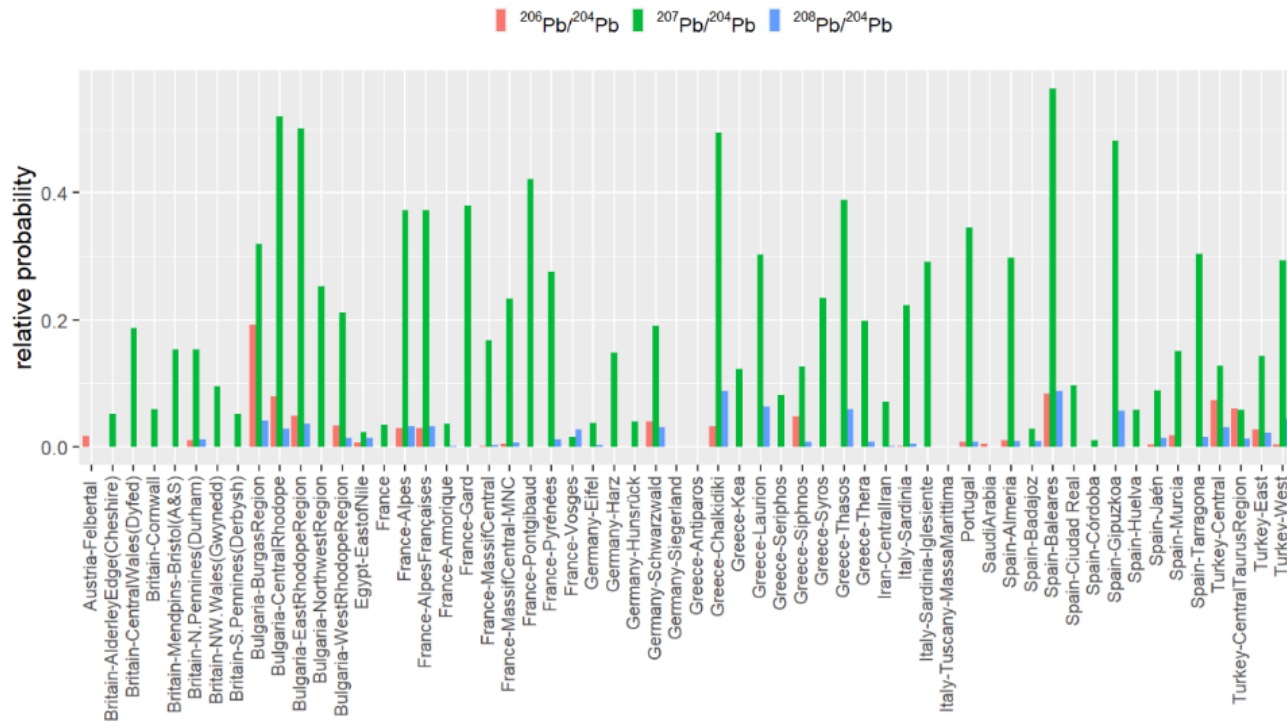

| Mining_Region                  | prob_206 | prob_207 | prob_208 | min>5%? | min |
|--------------------------------|----------|----------|----------|---------|-----|
| Austria-Felbertal              | 2%       | 0%       | 0%       | 0       | 0%  |
| Britain-AlderleyEdge(Cheshire) | 0%       | 5%       | 0%       | 0       | 0%  |
| Britain-CentralWales(Dyfed)    | 0%       | 19%      | 0%       | 0       | 0%  |
| Britain-Cornwall               | 0%       | 6%       | 0%       | 0       | 0%  |
| Britain-Mendpins-Bristol(A&S)  | 0%       | 15%      | 0%       | 0       | 0%  |
| Britain-N.Pennines(Durham)     | 1%       | 15%      | 1%       | 0       | 1%  |
| Britain-NW.Wales(Gwynedd)      | 0%       | 9%       | 0%       | 0       | 0%  |
| Britain-S.Pennines(Derbys)     | 0%       | 5%       | 0%       | 0       | 0%  |
| Bulgaria-BurgasRegion          | 19%      | 32%      | 4%       | 0       | 4%  |
| Bulgaria-CentralRhodope        | 8%       | 52%      | 3%       | 0       | 3%  |
| Bulgaria-EastRhodopeRegion     | 5%       | 50%      | 4%       | 0       | 4%  |
| Bulgaria-NorthwestRegion       | 0%       | 25%      | 0%       | 0       | 0%  |
| Bulgaria-WestRhodopeRegion     | 3%       | 21%      | 1%       | 0       | 1%  |
| Egypt-EastofNile               | 1%       | 2%       | 1%       | 0       | 1%  |
| France                         | 0%       | 4%       | 0%       | 0       | 0%  |
| France-Alpes                   | 3%       | 37%      | 3%       | 0       | 3%  |
| France-AlpesFrançaises         | 3%       | 37%      | 3%       | 0       | 3%  |
| France-Armorique               | 0%       | 4%       | 0%       | 0       | 0%  |
| France-Gard                    | 0%       | 38%      | 0%       | 0       | 0%  |
| France-MassifCentral           | 0%       | 17%      | 0%       | 0       | 0%  |
| France-MassifCentral-MNC       | 1%       | 23%      | 1%       | 0       | 1%  |
| France-Pontgibaud              | 0%       | 42%      | 0%       | 0       | 0%  |
| France-Pyrénées                | 0%       | 28%      | 1%       | 0       | 0%  |
| France-Vosges                  | 0%       | 1%       | 3%       | 0       | 0%  |
| Germany-Eifel                  | 0%       | 4%       | 0%       | 0       | 0%  |
| Germany-Harz                   | 0%       | 15%      | 0%       | 0       | 0%  |
| Germany-Hunsrück               | 0%       | 4%       | 0%       | 0       | 0%  |
| Germany-Schwarzwald            | 4%       | 19%      | 3%       | 0       | 3%  |
| Germany-Siegerland             | 0%       | 0%       | 0%       | 0       | 0%  |
| Greece-Antiparos               | 0%       | 0%       | 0%       | 0       | 0%  |
| Greece-Chalkidiki              | 3%       | 49%      | 9%       | 0       | 3%  |
| Greece-Kea                     | 0%       | 12%      | 0%       | 0       | 0%  |
| Greece-Laurion                 | 0%       | 30%      | 6%       | 0       | 0%  |
| Greece-Seriphos                | 0%       | 8%       | 0%       | 0       | 0%  |
| Greece-Siphnos                 | 5%       | 13%      | 1%       | 0       | 1%  |
| Greece-Syros                   | 0%       | 23%      | 0%       | 0       | 0%  |
| Greece-Thasos                  | 0%       | 39%      | 6%       | 0       | 0%  |
| Greece-Thera                   | 0%       | 20%      | 1%       | 0       | 0%  |
| Iran-CentrallIran              | 0%       | 7%       | 0%       | 0       | 0%  |
| Italy-Sardinia-Iglesiente      | 0%       | 22%      | 1%       | 0       | 0%  |
| Italy-Sardinia-Iglesiente      | 0%       | 29%      | 0%       | 0       | 0%  |
| Italy-Tuscany-MassaMarittima   | 0%       | 0%       | 0%       | 0       | 0%  |
| Portugal                       | 1%       | 35%      | 1%       | 0       | 1%  |
| SaudiArabia                    | 0%       | 0%       | 0%       | 0       | 0%  |
| Spain-Almeria                  | 1%       | 30%      | 1%       | 0       | 1%  |
| Spain-Badajoz                  | 0%       | 3%       | 1%       | 0       | 0%  |
| Spain-Balears                  | 8%       | 56%      | 9%       | 1       | 8%  |
| Spain-Ciudad Real              | 0%       | 10%      | 0%       | 0       | 0%  |
| Spain-Córdoba                  | 0%       | 1%       | 0%       | 0       | 0%  |
| Spain-Gipuzkoa                 | 0%       | 48%      | 6%       | 0       | 0%  |
| Spain-Huelva                   | 0%       | 6%       | 0%       | 0       | 0%  |
| Spain-Jaén                     | 0%       | 9%       | 1%       | 0       | 0%  |
| Spain-Murcia                   | 2%       | 15%      | 0%       | 0       | 0%  |
| Spain-Tarragona                | 0%       | 30%      | 2%       | 0       | 0%  |
| Turkey-Central                 | 7%       | 13%      | 3%       | 0       | 3%  |
| Turkey-CentralTaurusRegion     | 6%       | 6%       | 1%       | 0       | 1%  |
| Turkey-East                    | 3%       | 14%      | 2%       | 0       | 2%  |
| Turkey-West                    | 0%       | 29%      | 4%       | 0       | 0%  |



# 25-Victoriatius-112-1

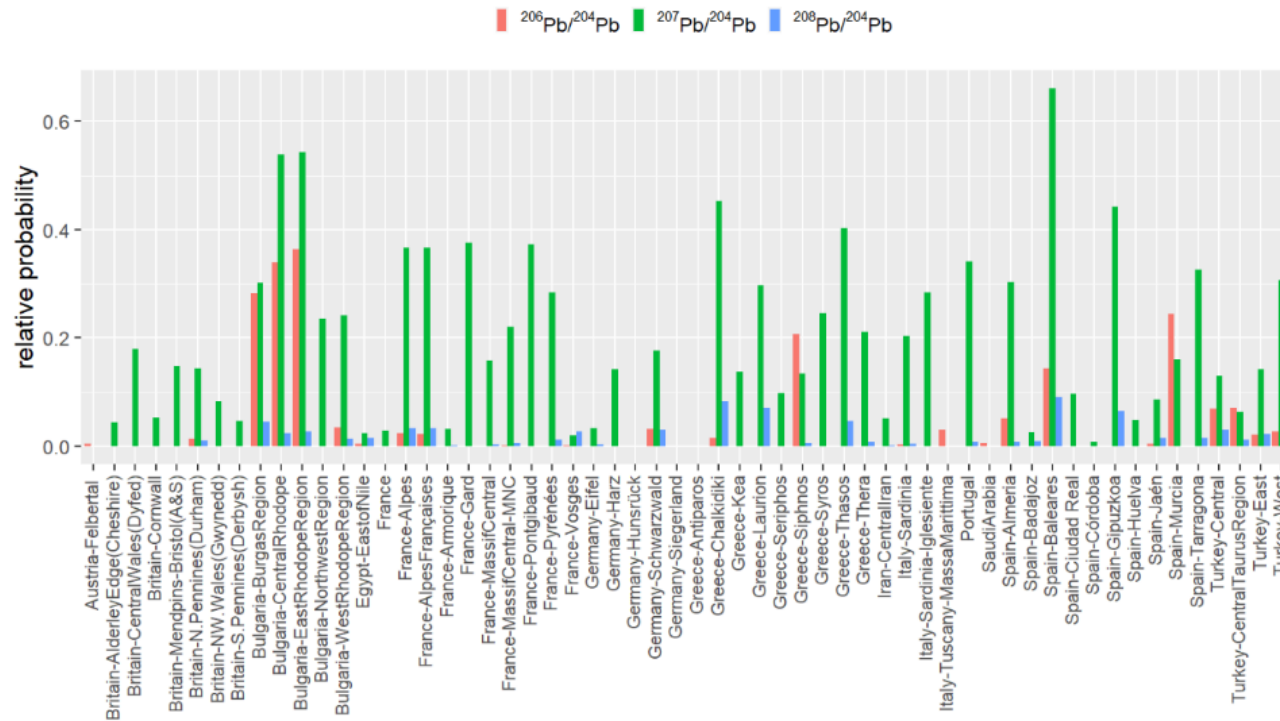

| Mining_Region                  | prob_206 | prob_207 | prob_208 | min>5%? | min |
|--------------------------------|----------|----------|----------|---------|-----|
| Austria-Felbertal              | 0%       | 0%       | 0%       | 0       | 0%  |
| Britain-AlderleyEdge(Cheshire) | 0%       | 4%       | 0%       | 0       | 0%  |
| Britain-CentralWales(Dyfed)    | 0%       | 18%      | 0%       | 0       | 0%  |
| Britain-Cornwall               | 0%       | 5%       | 0%       | 0       | 0%  |
| Britain-Mendips-Bristol(A&S)   | 0%       | 15%      | 0%       | 0       | 0%  |
| Britain-N.Pennines(Durham)     | 1%       | 14%      | 1%       | 0       | 1%  |
| Britain-NW.Wales(Gwynedd)      | 0%       | 8%       | 0%       | 0       | 0%  |
| Britain-S.Pennines(Derbysh)    | 0%       | 5%       | 0%       | 0       | 0%  |
| Bulgaria-BurgasRegion          | 28%      | 30%      | 5%       | 0       | 5%  |
| Bulgaria-CentralRhodope        | 34%      | 54%      | 2%       | 0       | 2%  |
| Bulgaria-EastRhodopeRegion     | 36%      | 54%      | 3%       | 0       | 3%  |
| Bulgaria-NorthwestRegion       | 0%       | 24%      | 0%       | 0       | 0%  |
| Bulgaria-WestRhodopeRegion     | 4%       | 24%      | 1%       | 0       | 1%  |
| Egypt-EastofNile               | 0%       | 2%       | 1%       | 0       | 0%  |
| France                         | 0%       | 3%       | 0%       | 0       | 0%  |
| France-Alpes                   | 2%       | 37%      | 3%       | 0       | 2%  |
| France-AlpesFrançaises         | 2%       | 37%      | 3%       | 0       | 2%  |
| France-Armorique               | 0%       | 3%       | 0%       | 0       | 0%  |
| France-Gard                    | 0%       | 38%      | 0%       | 0       | 0%  |
| France-MassifCentral           | 0%       | 16%      | 0%       | 0       | 0%  |
| France-MassifCentral-MNC       | 0%       | 22%      | 1%       | 0       | 0%  |
| France-Pontgibaud              | 0%       | 37%      | 0%       | 0       | 0%  |
| France-Pyrénées                | 0%       | 28%      | 1%       | 0       | 0%  |
| France-Vosges                  | 0%       | 2%       | 3%       | 0       | 0%  |
| Germany-Eifel                  | 0%       | 3%       | 0%       | 0       | 0%  |
| Germany-Harz                   | 0%       | 14%      | 0%       | 0       | 0%  |
| Germany-Hunsrück               | 0%       | 0%       | 0%       | 0       | 0%  |
| Germany-Schwarzwald            | 3%       | 18%      | 3%       | 0       | 3%  |
| Germany-Siegerland             | 0%       | 0%       | 0%       | 0       | 0%  |
| Greece-Antiparos               | 0%       | 0%       | 0%       | 0       | 0%  |
| Greece-Chalkidiki              | 2%       | 45%      | 8%       | 0       | 2%  |
| Greece-Kea                     | 0%       | 14%      | 0%       | 0       | 0%  |
| Greece-Laurion                 | 0%       | 30%      | 7%       | 0       | 0%  |
| Greece-Seriphos                | 0%       | 10%      | 0%       | 0       | 0%  |
| Greece-Siphnos                 | 21%      | 13%      | 1%       | 0       | 1%  |
| Greece-Syros                   | 0%       | 25%      | 0%       | 0       | 0%  |
| Greece-Thasos                  | 0%       | 40%      | 5%       | 0       | 0%  |
| Greece-Thera                   | 0%       | 21%      | 1%       | 0       | 0%  |
| Iran-Centrallran               | 0%       | 5%       | 0%       | 0       | 0%  |
| Italy-Sardinia                 | 0%       | 20%      | 0%       | 0       | 0%  |
| Italy-Sardinia-Iglesiente      | 0%       | 28%      | 0%       | 0       | 0%  |
| Italy-Tuscany-MassaMarittima   | 3%       | 0%       | 0%       | 0       | 0%  |
| Portugal                       | 0%       | 34%      | 1%       | 0       | 0%  |
| SaudiArabia                    | 1%       | 0%       | 0%       | 0       | 0%  |
| Spain-Almeria                  | 5%       | 30%      | 1%       | 0       | 1%  |
| Spain-Badajoz                  | 0%       | 3%       | 1%       | 0       | 0%  |
| Spain-Baleares                 | 14%      | 66%      | 9%       | 1       | 9%  |
| Spain-Ciudad Real              | 0%       | 10%      | 0%       | 0       | 0%  |
| Spain-Córdoba                  | 0%       | 1%       | 0%       | 0       | 0%  |
| Spain-Gipuzkoa                 | 0%       | 44%      | 7%       | 0       | 0%  |
| Spain-Huelva                   | 0%       | 5%       | 0%       | 0       | 0%  |
| Spain-Jaén                     | 0%       | 9%       | 1%       | 0       | 0%  |
| Spain-Murcia                   | 24%      | 16%      | 0%       | 0       | 0%  |
| Spain-Tarragona                | 0%       | 33%      | 2%       | 0       | 0%  |
| Turkey-Central                 | 7%       | 13%      | 3%       | 0       | 3%  |
| Turkey-CentralTaurusRegion     | 7%       | 6%       | 1%       | 0       | 1%  |
| Turkey-East                    | 2%       | 14%      | 2%       | 0       | 2%  |
| Turkey-West                    | 3%       | 31%      | 4%       | 0       | 3%  |

MS022

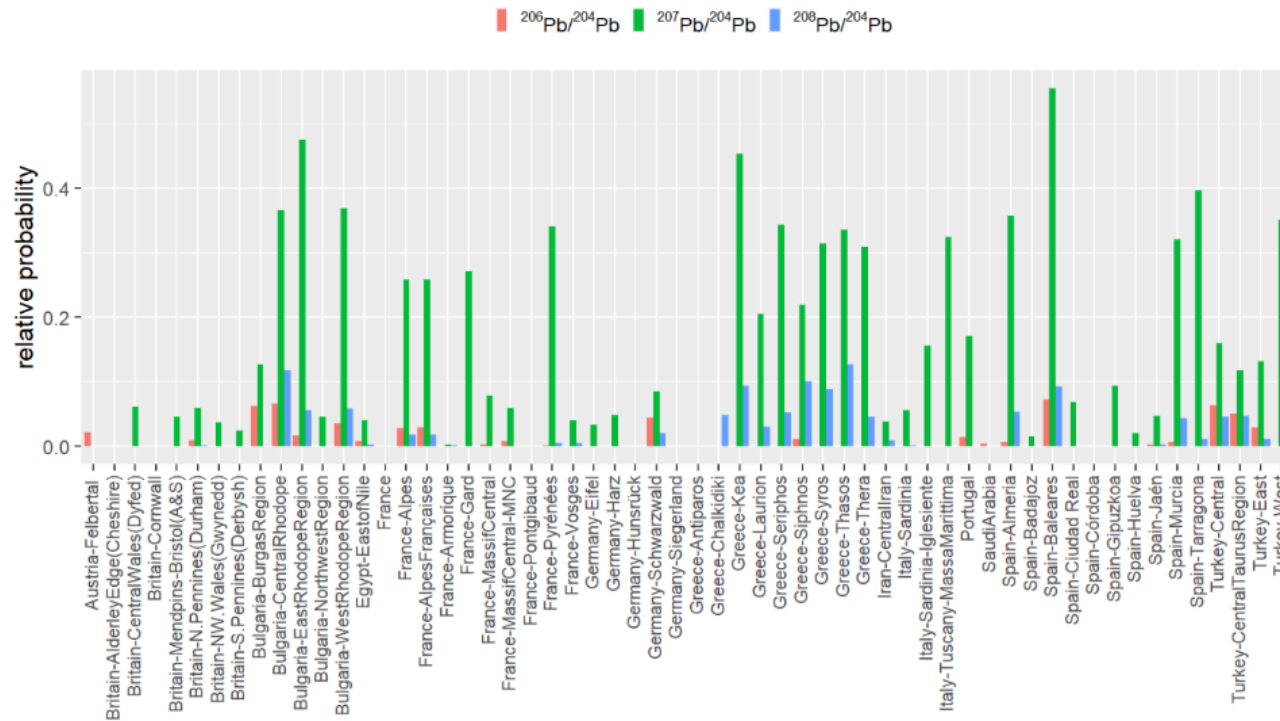

| Mining_Region                  | prob_206 | prob_207 | prob_208 | min>5%? | min |
|--------------------------------|----------|----------|----------|---------|-----|
| Austria-Felbertal              | 2%       | 0%       | 0%       | 0       | 0%  |
| Britain-AlderleyEdge(Cheshire) | 0%       | 0%       | 0%       | 0       | 0%  |
| Britain-CentralWales(Dyfed)    | 0%       | 6%       | 0%       | 0       | 0%  |
| Britain-Cornwall               | 0%       | 0%       | 0%       | 0       | 0%  |
| Britain-Mendpins-Bristol(A&S)  | 0%       | 5%       | 0%       | 0       | 0%  |
| Britain-N.Pennines(Durham)     | 1%       | 6%       | 0%       | 0       | 0%  |
| Britain-NW.Wales(Gwynedd)      | 0%       | 4%       | 0%       | 0       | 0%  |
| Britain-S.Pennines(Derbys)     | 0%       | 2%       | 0%       | 0       | 0%  |
| Bulgaria-BurgasRegion          | 6%       | 13%      | 0%       | 0       | 0%  |
| Bulgaria-CentralRhodope        | 7%       | 37%      | 12%      | 1       | 7%  |
| Bulgaria-EastRhodopeRegion     | 2%       | 48%      | 6%       | 0       | 2%  |
| Bulgaria-NorthwestRegion       | 0%       | 5%       | 0%       | 0       | 0%  |
| Bulgaria-WestRhodopeRegion     | 4%       | 37%      | 6%       | 0       | 4%  |
| Egypt-EastofNile               | 1%       | 4%       | 0%       | 0       | 0%  |
| France                         | 0%       | 0%       | 0%       | 0       | 0%  |
| France-Alpes                   | 3%       | 26%      | 2%       | 0       | 2%  |
| France-AlpesFrançaises         | 3%       | 26%      | 2%       | 0       | 2%  |
| France-Armorique               | 0%       | 0%       | 0%       | 0       | 0%  |
| France-Gard                    | 0%       | 27%      | 0%       | 0       | 0%  |
| France-MassifCentral           | 0%       | 8%       | 0%       | 0       | 0%  |
| France-MassifCentral-MNC       | 1%       | 6%       | 0%       | 0       | 0%  |
| France-Pontgibaud              | 0%       | 0%       | 0%       | 0       | 0%  |
| France-Pyrénées                | 0%       | 34%      | 1%       | 0       | 0%  |
| France-Vosges                  | 0%       | 4%       | 0%       | 0       | 0%  |
| Germany-Eifel                  | 0%       | 3%       | 0%       | 0       | 0%  |
| Germany-Harz                   | 0%       | 5%       | 0%       | 0       | 0%  |
| Germany-Hunsrück               | 0%       | 0%       | 0%       | 0       | 0%  |
| Germany-Schwarzwald            | 4%       | 8%       | 2%       | 0       | 2%  |
| Germany-Siegerland             | 0%       | 0%       | 0%       | 0       | 0%  |
| Greece-Aniparos                | 0%       | 0%       | 0%       | 0       | 0%  |
| Greece-Chalkidiki              | 0%       | 0%       | 0%       | 0       | 0%  |
| Greece-Kea                     | 0%       | 45%      | 9%       | 0       | 0%  |
| Greece-Laurion                 | 0%       | 21%      | 3%       | 0       | 0%  |
| Greece-Seriphos                | 0%       | 34%      | 5%       | 0       | 0%  |
| Greece-Siphnos                 | 1%       | 22%      | 10%      | 0       | 1%  |
| Greece-Syros                   | 0%       | 31%      | 9%       | 0       | 0%  |
| Greece-Thasos                  | 0%       | 34%      | 13%      | 0       | 0%  |
| Greece-Thera                   | 0%       | 31%      | 5%       | 0       | 0%  |
| Iran-Centrallran               | 0%       | 4%       | 1%       | 0       | 0%  |
| Italy-Sardinia                 | 0%       | 6%       | 0%       | 0       | 0%  |
| Italy-Sardinia-Iglesiente      | 0%       | 16%      | 0%       | 0       | 0%  |
| Italy-Tuscany-MassaMarittima   | 0%       | 32%      | 0%       | 0       | 0%  |
| Portugal                       | 1%       | 17%      | 0%       | 0       | 0%  |
| SaudiArabia                    | 0%       | 0%       | 0%       | 0       | 0%  |
| Spain-Almeria                  | 1%       | 36%      | 5%       | 0       | 1%  |
| Spain-Badajoz                  | 0%       | 2%       | 0%       | 0       | 0%  |
| Spain-Baleares                 | 7%       | 55%      | 9%       | 1       | 7%  |
| Spain-Ciudad Real              | 0%       | 7%       | 0%       | 0       | 0%  |
| Spain-Córdoba                  | 0%       | 0%       | 0%       | 0       | 0%  |
| Spain-Gipuzkoa                 | 0%       | 9%       | 0%       | 0       | 0%  |
| Spain-Huelva                   | 0%       | 2%       | 0%       | 0       | 0%  |
| Spain-Jaén                     | 0%       | 5%       | 0%       | 0       | 0%  |
| Spain-Murcia                   | 1%       | 32%      | 4%       | 0       | 1%  |
| Spain-Tarragona                | 0%       | 40%      | 1%       | 0       | 0%  |
| Turkey-Central                 | 6%       | 16%      | 5%       | 0       | 5%  |
| Turkey-CentralTaurusRegion     | 5%       | 12%      | 5%       | 0       | 5%  |
| Turkey-East                    | 3%       | 13%      | 1%       | 0       | 1%  |
| Turkey-West                    | 0%       | 35%      | 8%       | 0       | 0%  |

MS037

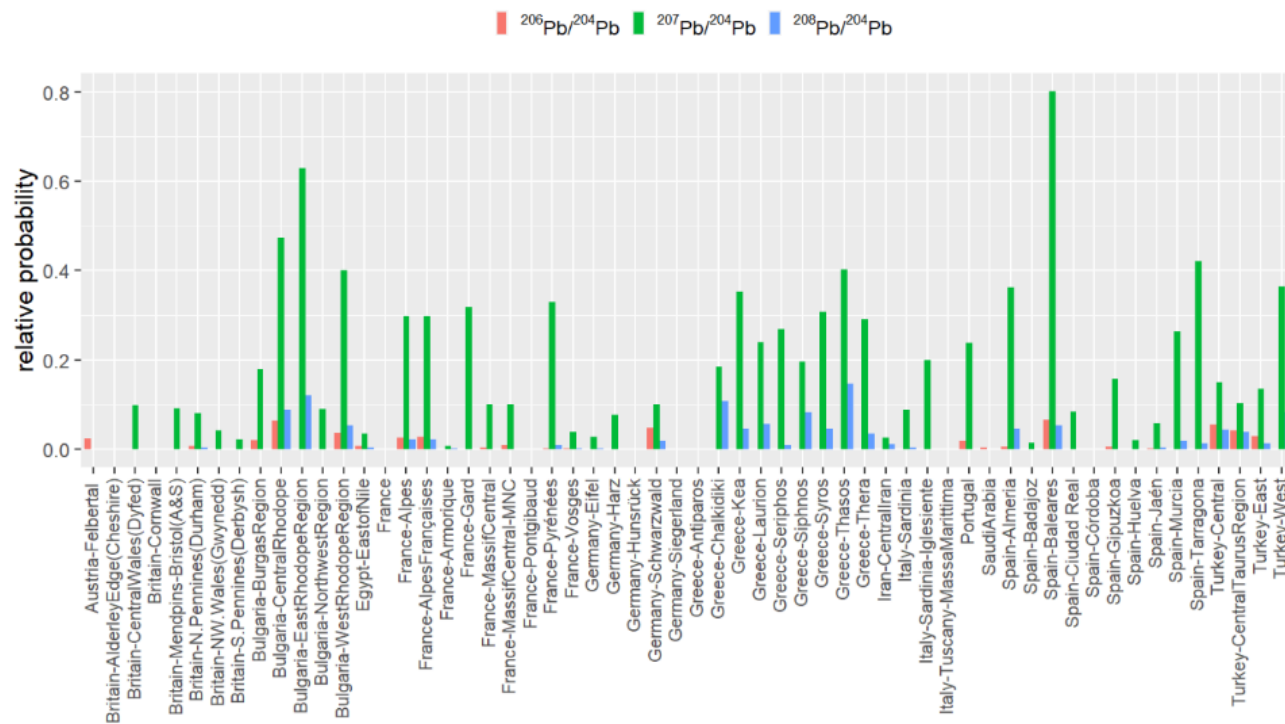

| Mining_Region                  | prob_206 | prob_207 | prob_208 | min>5%? | min |
|--------------------------------|----------|----------|----------|---------|-----|
| Austria-Felbertal              | 2%       | 0%       | 0%       | 0       | 0%  |
| Britain-AlderleyEdge(Cheshire) | 0%       | 0%       | 0%       | 0       | 0%  |
| Britain-CentralWales(Dyfed)    | 0%       | 10%      | 0%       | 0       | 0%  |
| Britain-Cornwall               | 0%       | 0%       | 0%       | 0       | 0%  |
| Britain-Mendips-Bristol(A&S)   | 0%       | 9%       | 0%       | 0       | 0%  |
| Britain-N.Pennines(Durham)     | 1%       | 8%       | 0%       | 0       | 0%  |
| Britain-NW.Wales(Gwynedd)      | 0%       | 4%       | 0%       | 0       | 0%  |
| Britain-S.Pennines(Derbysh)    | 0%       | 2%       | 0%       | 0       | 0%  |
| Bulgaria-BurgasRegion          | 2%       | 18%      | 0%       | 0       | 0%  |
| Bulgaria-CentralRhodope        | 6%       | 47%      | 9%       | 1       | 6%  |
| Bulgaria-EastRhodopeRegion     | 0%       | 63%      | 12%      | 0       | 0%  |
| Bulgaria-NorthwestRegion       | 0%       | 9%       | 0%       | 0       | 0%  |
| Bulgaria-WestRhodopeRegion     | 4%       | 40%      | 5%       | 0       | 4%  |
| Egypt-EastofNile               | 1%       | 4%       | 0%       | 0       | 0%  |
| France                         | 0%       | 0%       | 0%       | 0       | 0%  |
| France-Alpes                   | 3%       | 30%      | 2%       | 0       | 2%  |
| France-AlpesFrançaises         | 3%       | 30%      | 2%       | 0       | 2%  |
| France-Armorique               | 0%       | 1%       | 0%       | 0       | 0%  |
| France-Gard                    | 0%       | 32%      | 0%       | 0       | 0%  |
| France-MassifCentral           | 0%       | 10%      | 0%       | 0       | 0%  |
| France-MassifCentral-MNC       | 1%       | 10%      | 0%       | 0       | 0%  |
| France-Pontgibaud              | 0%       | 0%       | 0%       | 0       | 0%  |
| France-Pyrénées                | 0%       | 33%      | 1%       | 0       | 0%  |
| France-Vosges                  | 0%       | 4%       | 0%       | 0       | 0%  |
| Germany-Eifel                  | 0%       | 3%       | 0%       | 0       | 0%  |
| Germany-Harz                   | 0%       | 8%       | 0%       | 0       | 0%  |
| Germany-Hunsrück               | 0%       | 0%       | 0%       | 0       | 0%  |
| Germany-Schwarzwald            | 5%       | 10%      | 2%       | 0       | 2%  |
| Germany-Siegerland             | 0%       | 0%       | 0%       | 0       | 0%  |
| Greece-Aniparos                | 0%       | 0%       | 0%       | 0       | 0%  |
| Greece-Chalkidiki              | 0%       | 0%       | 0%       | 0       | 0%  |
| Greece-Kea                     | 0%       | 19%      | 11%      | 0       | 0%  |
| Greece-Laurion                 | 0%       | 35%      | 5%       | 0       | 0%  |
| Greece-Seriphos                | 0%       | 24%      | 6%       | 0       | 0%  |
| Greece-Siphnos                 | 0%       | 27%      | 1%       | 0       | 0%  |
| Greece-Syros                   | 0%       | 20%      | 8%       | 0       | 0%  |
| Greece-Thasos                  | 0%       | 31%      | 5%       | 0       | 0%  |
| Greece-Thera                   | 0%       | 40%      | 15%      | 0       | 0%  |
| Iran-CentrallIran              | 0%       | 29%      | 3%       | 0       | 0%  |
| Italy-Sardinia-Iglesiente      | 0%       | 3%       | 1%       | 0       | 0%  |
| Italy-Sardinia                 | 0%       | 9%       | 0%       | 0       | 0%  |
| Italy-Tuscany-MassaMarittima   | 0%       | 20%      | 0%       | 0       | 0%  |
| Portugal                       | 0%       | 0%       | 0%       | 0       | 0%  |
| SaudiArabia                    | 2%       | 24%      | 0%       | 0       | 0%  |
| Spain-Almeria                  | 0%       | 0%       | 0%       | 0       | 0%  |
| Spain-Badajoz                  | 1%       | 36%      | 5%       | 0       | 1%  |
| Spain-Badajoz                  | 0%       | 1%       | 0%       | 0       | 0%  |
| Spain-Badajoz                  | 7%       | 80%      | 5%       | 1       | 5%  |
| Spain-Ciudad Real              | 0%       | 8%       | 0%       | 0       | 0%  |
| Spain-Córdoba                  | 0%       | 0%       | 0%       | 0       | 0%  |
| Spain-Gipuzkoa                 | 1%       | 16%      | 0%       | 0       | 0%  |
| Spain-Huelva                   | 0%       | 2%       | 0%       | 0       | 0%  |
| Spain-Jaén                     | 0%       | 6%       | 0%       | 0       | 0%  |
| Spain-Murcia                   | 0%       | 26%      | 2%       | 0       | 0%  |
| Spain-Tarragona                | 0%       | 42%      | 1%       | 0       | 0%  |
| Turkey-Central                 | 6%       | 15%      | 4%       | 0       | 4%  |
| Turkey-CentralTaurusRegion     | 4%       | 10%      | 4%       | 0       | 4%  |
| Turkey-East                    | 3%       | 13%      | 1%       | 0       | 1%  |
| Turkey-West                    | 0%       | 36%      | 8%       | 0       | 0%  |

MS043

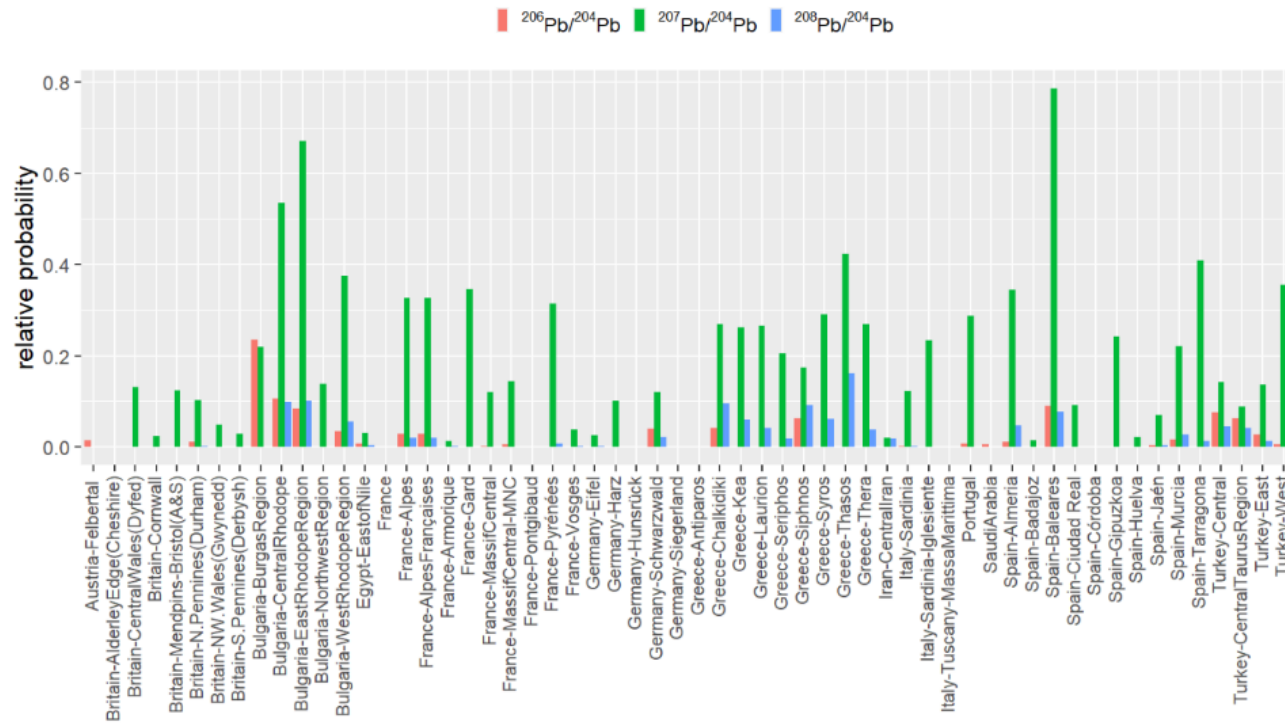

| Mining_Region                  | prob_206 | prob_207 | prob_208 | min>5%? | min |
|--------------------------------|----------|----------|----------|---------|-----|
| Austria-Felbertal              | 1%       | 0%       | 0%       | 0       | 0%  |
| Britain-AlderleyEdge(Cheshire) | 0%       | 0%       | 0%       | 0       | 0%  |
| Britain-CentralWales(Dyfed)    | 0%       | 13%      | 0%       | 0       | 0%  |
| Britain-Cornwall               | 0%       | 2%       | 0%       | 0       | 0%  |
| Britain-Mendips-Bristol(A&S)   | 0%       | 12%      | 0%       | 0       | 0%  |
| Britain-N.Pennines(Durham)     | 1%       | 10%      | 0%       | 0       | 0%  |
| Britain-NW.Wales(Gwynedd)      | 0%       | 5%       | 0%       | 0       | 0%  |
| Britain-S.Pennines(Derbysh)    | 0%       | 3%       | 0%       | 0       | 0%  |
| Bulgaria-BurgasRegion          | 23%      | 22%      | 0%       | 0       | 0%  |
| Bulgaria-CentralRhodope        | 11%      | 53%      | 10%      | 1       | 10% |
| Bulgaria-EastRhodopeRegion     | 8%       | 67%      | 10%      | 1       | 8%  |
| Bulgaria-NorthwestRegion       | 0%       | 14%      | 0%       | 0       | 0%  |
| Bulgaria-WestRhodopeRegion     | 3%       | 37%      | 6%       | 0       | 3%  |
| Egypt-EastofNile               | 1%       | 3%       | 0%       | 0       | 0%  |
| France                         | 0%       | 0%       | 0%       | 0       | 0%  |
| France-Alpes                   | 3%       | 33%      | 2%       | 0       | 2%  |
| France-AlpesFrançaises         | 3%       | 33%      | 2%       | 0       | 2%  |
| France-Armorique               | 0%       | 1%       | 0%       | 0       | 0%  |
| France-Gard                    | 0%       | 35%      | 0%       | 0       | 0%  |
| France-MassifCentral           | 0%       | 12%      | 0%       | 0       | 0%  |
| France-MassifCentral-MNC       | 1%       | 14%      | 0%       | 0       | 0%  |
| France-Pontgibaud              | 0%       | 0%       | 0%       | 0       | 0%  |
| France-Pyrénées                | 0%       | 31%      | 1%       | 0       | 0%  |
| France-Vosges                  | 0%       | 4%       | 0%       | 0       | 0%  |
| Germany-Eifel                  | 0%       | 3%       | 0%       | 0       | 0%  |
| Germany-Harz                   | 0%       | 10%      | 0%       | 0       | 0%  |
| Germany-Hunsrück               | 0%       | 0%       | 0%       | 0       | 0%  |
| Germany-Schwarzwald            | 4%       | 12%      | 2%       | 0       | 2%  |
| Germany-Siegerland             | 0%       | 0%       | 0%       | 0       | 0%  |
| Greece-Antiparos               | 0%       | 0%       | 0%       | 0       | 0%  |
| Greece-Chalkidiki              | 4%       | 27%      | 10%      | 0       | 4%  |
| Greece-Kea                     | 0%       | 26%      | 6%       | 0       | 0%  |
| Greece-Laurion                 | 0%       | 27%      | 4%       | 0       | 0%  |
| Greece-Seriphos                | 0%       | 20%      | 2%       | 0       | 0%  |
| Greece-Siphnos                 | 6%       | 17%      | 9%       | 1       | 6%  |
| Greece-Syros                   | 0%       | 29%      | 6%       | 0       | 0%  |
| Greece-Thasos                  | 0%       | 42%      | 16%      | 0       | 0%  |
| Greece-Thera                   | 0%       | 27%      | 4%       | 0       | 0%  |
| Iran-Centrallran               | 0%       | 2%       | 2%       | 0       | 0%  |
| Italy-Sardinia-Iglesiente      | 0%       | 12%      | 0%       | 0       | 0%  |
| Italy-Sardinia-MassaMarittima  | 0%       | 23%      | 0%       | 0       | 0%  |
| Italy-Tuscany-MassaMarittima   | 0%       | 0%       | 0%       | 0       | 0%  |
| Portugal                       | 1%       | 29%      | 0%       | 0       | 0%  |
| SaudiArabia                    | 0%       | 0%       | 0%       | 0       | 0%  |
| Spain-Almeria                  | 1%       | 35%      | 5%       | 0       | 1%  |
| Spain-Badajoz                  | 0%       | 1%       | 0%       | 0       | 0%  |
| Spain-Baleares                 | 9%       | 79%      | 8%       | 1       | 8%  |
| Spain-Ciudad Real              | 0%       | 9%       | 0%       | 0       | 0%  |
| Spain-Córdoba                  | 0%       | 0%       | 0%       | 0       | 0%  |
| Spain-Gipuzkoa                 | 0%       | 24%      | 0%       | 0       | 0%  |
| Spain-Huelva                   | 0%       | 2%       | 0%       | 0       | 0%  |
| Spain-Jaén                     | 0%       | 7%       | 0%       | 0       | 0%  |
| Spain-Murcia                   | 2%       | 22%      | 3%       | 0       | 2%  |
| Spain-Tarragona                | 0%       | 41%      | 1%       | 0       | 0%  |
| Turkey-Central                 | 8%       | 14%      | 4%       | 0       | 4%  |
| Turkey-CentralTaurusRegion     | 6%       | 9%       | 4%       | 0       | 4%  |
| Turkey-East                    | 3%       | 14%      | 1%       | 0       | 1%  |
| Turkey-West                    | 1%       | 35%      | 8%       | 0       | 1%  |

MS047

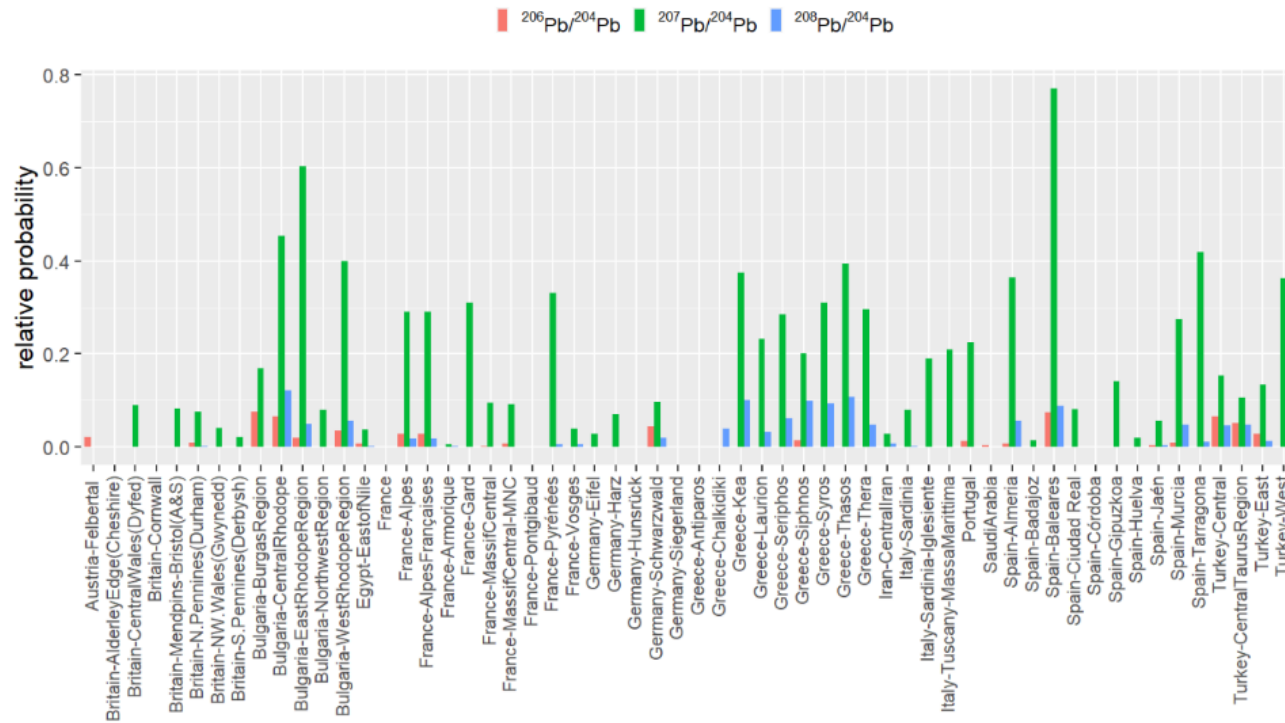

| Mining_Region                  | prob_206 | prob_207 | prob_208 | min>5%? | min |
|--------------------------------|----------|----------|----------|---------|-----|
| Austria-Felbertal              | 2%       | 0%       | 0%       | 0       | 0%  |
| Britain-AlderleyEdge(Cheshire) | 0%       | 0%       | 0%       | 0       | 0%  |
| Britain-CentralWales(Dyfed)    | 0%       | 9%       | 0%       | 0       | 0%  |
| Britain-Cornwall               | 0%       | 0%       | 0%       | 0       | 0%  |
| Britain-Mendips-Bristol(A&S)   | 0%       | 8%       | 0%       | 0       | 0%  |
| Britain-N.Pennines(Durham)     | 1%       | 8%       | 0%       | 0       | 0%  |
| Britain-NW.Wales(Gwynedd)      | 0%       | 4%       | 0%       | 0       | 0%  |
| Britain-S.Pennines(Derbysh)    | 0%       | 2%       | 0%       | 0       | 0%  |
| Bulgaria-BurgasRegion          | 8%       | 17%      | 0%       | 0       | 0%  |
| Bulgaria-CentralRhodope        | 7%       | 45%      | 12%      | 1       | 7%  |
| Bulgaria-EastRhodopeRegion     | 2%       | 60%      | 5%       | 0       | 2%  |
| Bulgaria-NorthwestRegion       | 0%       | 8%       | 0%       | 0       | 0%  |
| Bulgaria-WestRhodopeRegion     | 3%       | 40%      | 6%       | 0       | 3%  |
| Egypt-EastofNile               | 1%       | 4%       | 0%       | 0       | 0%  |
| France                         | 0%       | 0%       | 0%       | 0       | 0%  |
| France-Alpes                   | 3%       | 29%      | 2%       | 0       | 2%  |
| France-AlpesFrançaises         | 3%       | 29%      | 2%       | 0       | 2%  |
| France-Armorique               | 0%       | 1%       | 0%       | 0       | 0%  |
| France-Gard                    | 0%       | 31%      | 0%       | 0       | 0%  |
| France-MassifCentral           | 0%       | 10%      | 0%       | 0       | 0%  |
| France-MassifCentral-MNC       | 1%       | 9%       | 0%       | 0       | 0%  |
| France-Pontgibaud              | 0%       | 0%       | 0%       | 0       | 0%  |
| France-Pyrénées                | 0%       | 33%      | 0%       | 0       | 0%  |
| France-Vosges                  | 0%       | 4%       | 1%       | 0       | 0%  |
| Germany-Eifel                  | 0%       | 3%       | 0%       | 0       | 0%  |
| Germany-Harz                   | 0%       | 7%       | 0%       | 0       | 0%  |
| Germany-Hunsrück               | 0%       | 0%       | 0%       | 0       | 0%  |
| Germany-Schwarzwald            | 4%       | 10%      | 2%       | 0       | 2%  |
| Germany-Siegerland             | 0%       | 0%       | 0%       | 0       | 0%  |
| Greece-Antiparos               | 0%       | 0%       | 0%       | 0       | 0%  |
| Greece-Chalkidiki              | 0%       | 0%       | 4%       | 0       | 0%  |
| Greece-Kea                     | 0%       | 37%      | 10%      | 0       | 0%  |
| Greece-Laurion                 | 0%       | 23%      | 3%       | 0       | 0%  |
| Greece-Seriphos                | 0%       | 28%      | 6%       | 0       | 0%  |
| Greece-Siphnos                 | 1%       | 20%      | 10%      | 0       | 1%  |
| Greece-Syros                   | 0%       | 31%      | 9%       | 0       | 0%  |
| Greece-Thasos                  | 0%       | 39%      | 11%      | 0       | 0%  |
| Greece-Thera                   | 0%       | 30%      | 5%       | 0       | 0%  |
| Iran-Centrallran               | 0%       | 3%       | 1%       | 0       | 0%  |
| Italy-Sardinia                 | 0%       | 8%       | 0%       | 0       | 0%  |
| Italy-Sardinia-Iglesiente      | 0%       | 19%      | 0%       | 0       | 0%  |
| Italy-Tuscany-MassaMarittima   | 0%       | 21%      | 0%       | 0       | 0%  |
| Portugal                       | 1%       | 22%      | 0%       | 0       | 0%  |
| SaudiArabia                    | 0%       | 0%       | 0%       | 0       | 0%  |
| Spain-Almeria                  | 1%       | 36%      | 6%       | 0       | 1%  |
| Spain-Badajoz                  | 0%       | 1%       | 0%       | 0       | 0%  |
| Spain-Baleares                 | 7%       | 77%      | 9%       | 1       | 7%  |
| Spain-Ciudad Real              | 0%       | 8%       | 0%       | 0       | 0%  |
| Spain-Córdoba                  | 0%       | 0%       | 0%       | 0       | 0%  |
| Spain-Gipuzkoa                 | 0%       | 14%      | 0%       | 0       | 0%  |
| Spain-Huelva                   | 0%       | 2%       | 0%       | 0       | 0%  |
| Spain-Jaén                     | 0%       | 6%       | 0%       | 0       | 0%  |
| Spain-Murcia                   | 1%       | 28%      | 5%       | 0       | 1%  |
| Spain-Tarragona                | 0%       | 42%      | 1%       | 0       | 0%  |
| Turkey-Central                 | 6%       | 15%      | 5%       | 0       | 5%  |
| Turkey-CentralTaurusRegion     | 5%       | 11%      | 5%       | 0       | 5%  |
| Turkey-East                    | 3%       | 13%      | 1%       | 0       | 1%  |
| Turkey-West                    | 0%       | 36%      | 8%       | 0       | 0%  |



MS049

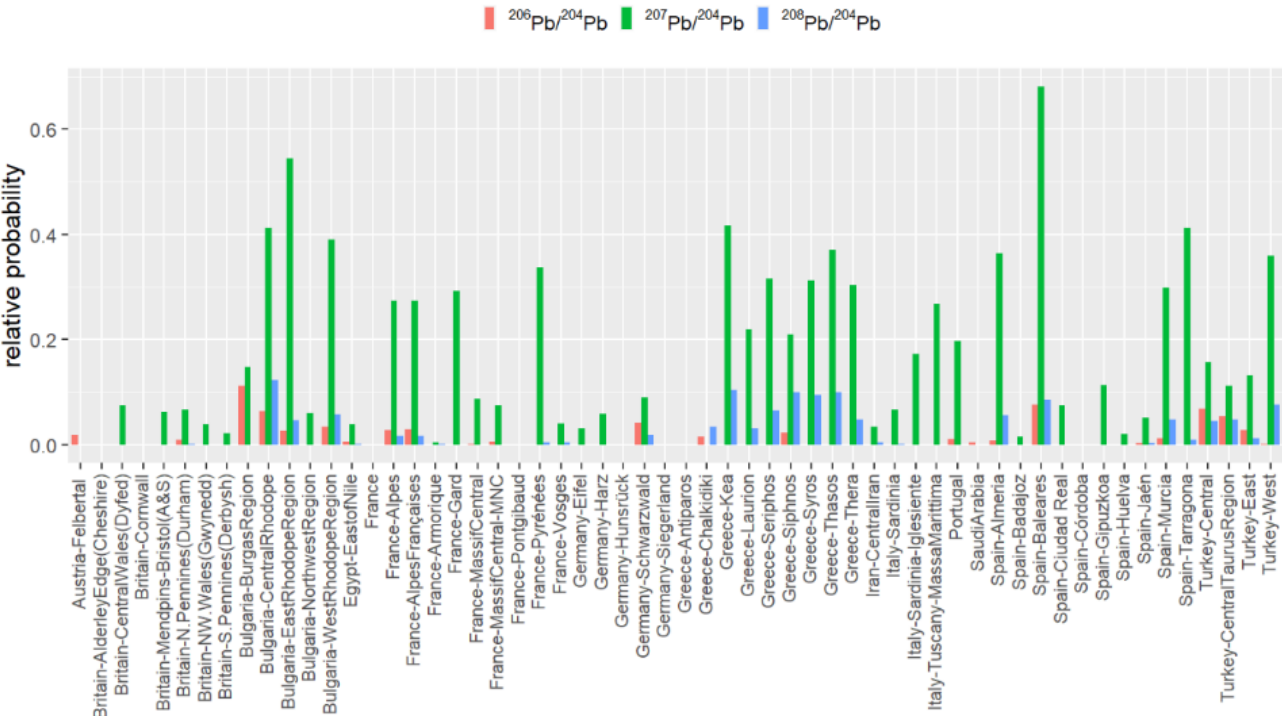

| Mining_Region                  | prob_206 | prob_207 | prob_208 | min>5%? | min |
|--------------------------------|----------|----------|----------|---------|-----|
| Austria-Felbertal              | 2%       | 0%       | 0%       | 0       | 0%  |
| Britain-AlderleyEdge(Cheshire) | 0%       | 0%       | 0%       | 0       | 0%  |
| Britain-CentralWales(Dyfed)    | 0%       | 7%       | 0%       | 0       | 0%  |
| Britain-Cornwall               | 0%       | 0%       | 0%       | 0       | 0%  |
| Britain-Mendpins-Bristol(A&S)  | 0%       | 6%       | 0%       | 0       | 0%  |
| Britain-N.Pennines(Durham)     | 1%       | 7%       | 0%       | 0       | 0%  |
| Britain-NW.Wales(Gwynedd)      | 0%       | 4%       | 0%       | 0       | 0%  |
| Britain-S.Pennines(Derbysh)    | 0%       | 2%       | 0%       | 0       | 0%  |
| Bulgaria-BurgasRegion          | 11%      | 15%      | 0%       | 0       | 0%  |
| Bulgaria-CentralRhodope        | 6%       | 41%      | 12%      | 1       | 6%  |
| Bulgaria-EastRhodopeRegion     | 3%       | 54%      | 5%       | 0       | 3%  |
| Bulgaria-NorthwestRegion       | 0%       | 6%       | 0%       | 0       | 0%  |
| Bulgaria-WestRhodopeRegion     | 3%       | 39%      | 6%       | 0       | 3%  |
| Egypt-EastofNile               | 1%       | 4%       | 0%       | 0       | 0%  |
| France                         | 0%       | 0%       | 0%       | 0       | 0%  |
| France-Alpes                   | 3%       | 27%      | 2%       | 0       | 2%  |
| France-AlpesFrançaises         | 3%       | 27%      | 2%       | 0       | 2%  |
| France-Armorique               | 0%       | 0%       | 0%       | 0       | 0%  |
| France-Gard                    | 0%       | 29%      | 0%       | 0       | 0%  |
| France-MassifCentral           | 0%       | 9%       | 0%       | 0       | 0%  |
| France-MassifCentral-MNC       | 1%       | 7%       | 0%       | 0       | 0%  |
| France-Pontgibaud              | 0%       | 0%       | 0%       | 0       | 0%  |
| France-Pyrénées                | 0%       | 34%      | 0%       | 0       | 0%  |
| France-Vosges                  | 0%       | 4%       | 1%       | 0       | 0%  |
| Germany-Eifel                  | 0%       | 3%       | 0%       | 0       | 0%  |
| Germany-Harz                   | 0%       | 6%       | 0%       | 0       | 0%  |
| Germany-Hunsrück               | 0%       | 0%       | 0%       | 0       | 0%  |
| Germany-Schwarzwald            | 4%       | 9%       | 2%       | 0       | 2%  |
| Germany-Siegerland             | 0%       | 0%       | 0%       | 0       | 0%  |
| Greece-Antiparos               | 0%       | 0%       | 0%       | 0       | 0%  |
| Greece-Chalkidiki              | 2%       | 0%       | 3%       | 0       | 0%  |
| Greece-Kea                     | 0%       | 42%      | 10%      | 0       | 0%  |
| Greece-Laurion                 | 0%       | 22%      | 3%       | 0       | 0%  |
| Greece-Seriphos                | 0%       | 31%      | 7%       | 0       | 0%  |
| Greece-Siphnos                 | 2%       | 21%      | 10%      | 0       | 2%  |
| Greece-Syros                   | 0%       | 31%      | 9%       | 0       | 0%  |
| Greece-Thasos                  | 0%       | 37%      | 10%      | 0       | 0%  |
| Greece-Thera                   | 0%       | 30%      | 5%       | 0       | 0%  |
| Iran-Centrallran               | 0%       | 3%       | 1%       | 0       | 0%  |
| Italy-Sardinia                 | 0%       | 7%       | 0%       | 0       | 0%  |
| Italy-Sardinia-Iglesiente      | 0%       | 17%      | 0%       | 0       | 0%  |
| Italy-Tuscany-MassaMarittima   | 0%       | 27%      | 0%       | 0       | 0%  |
| Portugal                       | 1%       | 20%      | 0%       | 0       | 0%  |
| SaudiArabia                    | 0%       | 0%       | 0%       | 0       | 0%  |
| Spain-Almeria                  | 1%       | 36%      | 6%       | 0       | 1%  |
| Spain-Badajoz                  | 0%       | 1%       | 0%       | 0       | 0%  |
| Spain-Baleares                 | 8%       | 68%      | 9%       | 1       | 8%  |
| Spain-Ciudad Real              | 0%       | 7%       | 0%       | 0       | 0%  |
| Spain-Córdoba                  | 0%       | 0%       | 0%       | 0       | 0%  |
| Spain-Gipuzkoa                 | 0%       | 11%      | 0%       | 0       | 0%  |
| Spain-Huelva                   | 0%       | 2%       | 0%       | 0       | 0%  |
| Spain-Jaén                     | 0%       | 5%       | 0%       | 0       | 0%  |
| Spain-Murcia                   | 1%       | 30%      | 5%       | 0       | 1%  |
| Spain-Tarragona                | 0%       | 41%      | 1%       | 0       | 0%  |
| Turkey-Central                 | 7%       | 16%      | 5%       | 0       | 5%  |
| Turkey-CentralTaurusRegion     | 6%       | 11%      | 5%       | 0       | 5%  |
| Turkey-East                    | 3%       | 13%      | 1%       | 0       | 1%  |
| Turkey-West                    | 0%       | 36%      | 8%       | 0       | 0%  |

R90

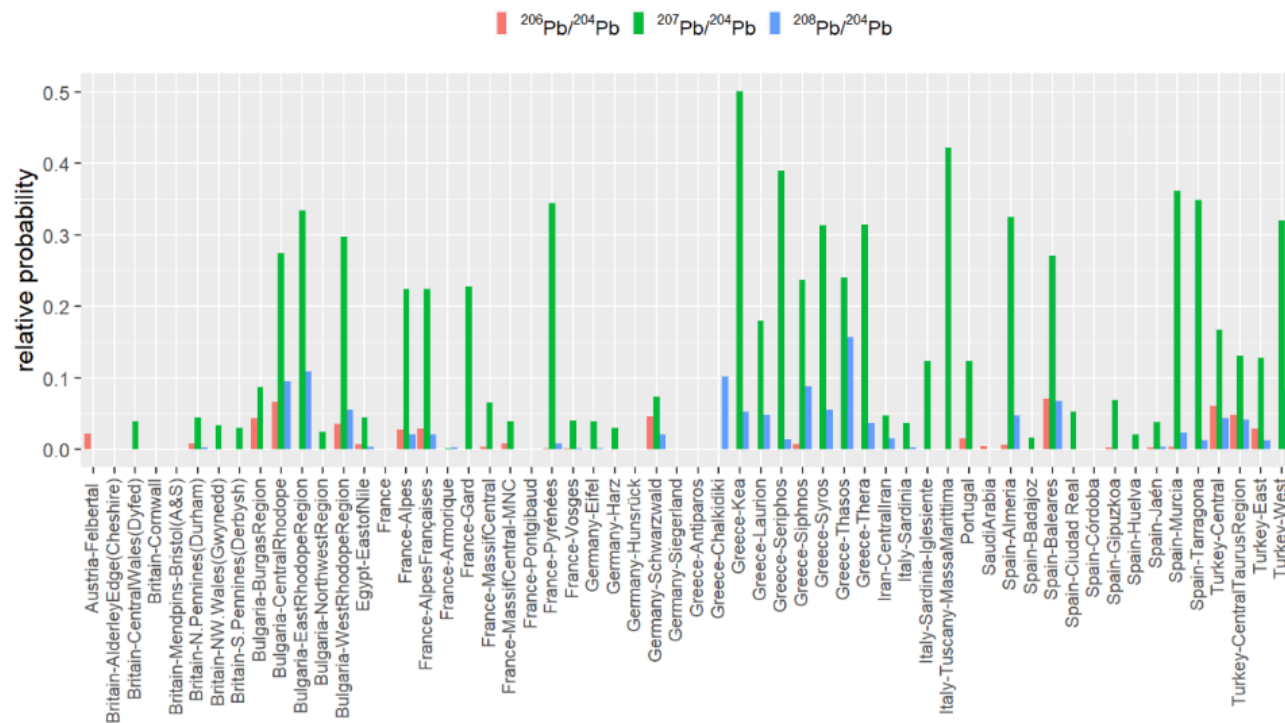

| Mining_Regions                 | prob_206 | prob_207 | prob_208 | min>5%? | min |
|--------------------------------|----------|----------|----------|---------|-----|
| Austria-Felbertal              | 2%       | 0%       | 0%       | 0       | 0%  |
| Britain-AlderleyEdge(Cheshire) | 0%       | 0%       | 0%       | 0       | 0%  |
| Britain-CentralWales(Dyfed)    | 0%       | 4%       | 0%       | 0       | 0%  |
| Britain-Cornwall               | 0%       | 0%       | 0%       | 0       | 0%  |
| Britain-Mendips-Bristol(A&S)   | 0%       | 0%       | 0%       | 0       | 0%  |
| Britain-N.Pennines(Durham)     | 1%       | 4%       | 0%       | 0       | 0%  |
| Britain-NW.Wales(Gwynedd)      | 0%       | 3%       | 0%       | 0       | 0%  |
| Britain-S.Pennines(Derbysh)    | 0%       | 3%       | 0%       | 0       | 0%  |
| Bulgaria-BurgasRegion          | 4%       | 9%       | 0%       | 0       | 0%  |
| Bulgaria-CentralRhodope        | 7%       | 27%      | 10%      | 1       | 7%  |
| Bulgaria-EastRhodopeRegion     | 0%       | 33%      | 11%      | 0       | 0%  |
| Bulgaria-NorthwestRegion       | 0%       | 2%       | 0%       | 0       | 0%  |
| Bulgaria-WestRhodopeRegion     | 4%       | 30%      | 6%       | 0       | 4%  |
| Egypt-EastofNile               | 1%       | 4%       | 0%       | 0       | 0%  |
| France                         | 0%       | 0%       | 0%       | 0       | 0%  |
| France-Alpes                   | 3%       | 22%      | 2%       | 0       | 2%  |
| France-AlpesFrançaises         | 3%       | 22%      | 2%       | 0       | 2%  |
| France-Armorique               | 0%       | 0%       | 0%       | 0       | 0%  |
| France-Gard                    | 0%       | 23%      | 0%       | 0       | 0%  |
| France-MassifCentral           | 0%       | 6%       | 0%       | 0       | 0%  |
| France-MassifCentral-MNC       | 1%       | 4%       | 0%       | 0       | 0%  |
| France-Pontgibaud              | 0%       | 0%       | 0%       | 0       | 0%  |
| France-Pyrénées                | 0%       | 34%      | 1%       | 0       | 0%  |
| France-Vosges                  | 0%       | 4%       | 0%       | 0       | 0%  |
| Germany-Eifel                  | 0%       | 4%       | 0%       | 0       | 0%  |
| Germany-Harz                   | 0%       | 3%       | 0%       | 0       | 0%  |
| Germany-Hunsrück               | 0%       | 0%       | 0%       | 0       | 0%  |
| Germany-Schwarzwald            | 5%       | 7%       | 2%       | 0       | 2%  |
| Germany-Siegerland             | 0%       | 0%       | 0%       | 0       | 0%  |
| Greece-Antiparos               | 0%       | 0%       | 0%       | 0       | 0%  |
| Greece-Chalkidiki              | 0%       | 0%       | 10%      | 0       | 0%  |
| Greece-Kea                     | 0%       | 50%      | 5%       | 0       | 0%  |
| Greece-Laurion                 | 0%       | 18%      | 5%       | 0       | 0%  |
| Greece-Seriphos                | 0%       | 39%      | 1%       | 0       | 0%  |
| Greece-Siphnos                 | 1%       | 24%      | 9%       | 0       | 1%  |
| Greece-Syros                   | 0%       | 31%      | 5%       | 0       | 0%  |
| Greece-Thasos                  | 0%       | 24%      | 16%      | 0       | 0%  |
| Greece-Thera                   | 0%       | 31%      | 4%       | 0       | 0%  |
| Iran-Centrallran               | 0%       | 5%       | 2%       | 0       | 0%  |
| Italy-Sardinia                 | 0%       | 4%       | 0%       | 0       | 0%  |
| Italy-Sardinia-Iglesiente      | 0%       | 12%      | 0%       | 0       | 0%  |
| Italy-Tuscany-MassaMarittima   | 0%       | 42%      | 0%       | 0       | 0%  |
| Portugal                       | 2%       | 12%      | 0%       | 0       | 0%  |
| SaudiArabia                    | 0%       | 0%       | 0%       | 0       | 0%  |
| Spain-Almeria                  | 1%       | 33%      | 5%       | 0       | 1%  |
| Spain-Badajoz                  | 0%       | 2%       | 0%       | 0       | 0%  |
| Spain-Baleares                 | 7%       | 27%      | 7%       | 1       | 7%  |
| Spain-Ciudad Real              | 0%       | 5%       | 0%       | 0       | 0%  |
| Spain-Córdoba                  | 0%       | 0%       | 0%       | 0       | 0%  |
| Spain-Gipuzkoa                 | 0%       | 7%       | 0%       | 0       | 0%  |
| Spain-Huelva                   | 0%       | 2%       | 0%       | 0       | 0%  |
| Spain-Jaén                     | 0%       | 4%       | 0%       | 0       | 0%  |
| Spain-Murcia                   | 0%       | 36%      | 2%       | 0       | 0%  |
| Spain-Tarragona                | 0%       | 35%      | 1%       | 0       | 0%  |
| Turkey-Central                 | 6%       | 17%      | 4%       | 0       | 4%  |
| Turkey-CentralTaurusRegion     | 5%       | 13%      | 4%       | 0       | 4%  |
| Turkey-East                    | 3%       | 13%      | 1%       | 0       | 1%  |
| Turkey-West                    | 0%       | 32%      | 8%       | 0       | 0%  |

b. Gipuzkoa

2-Dioscuri-139-1

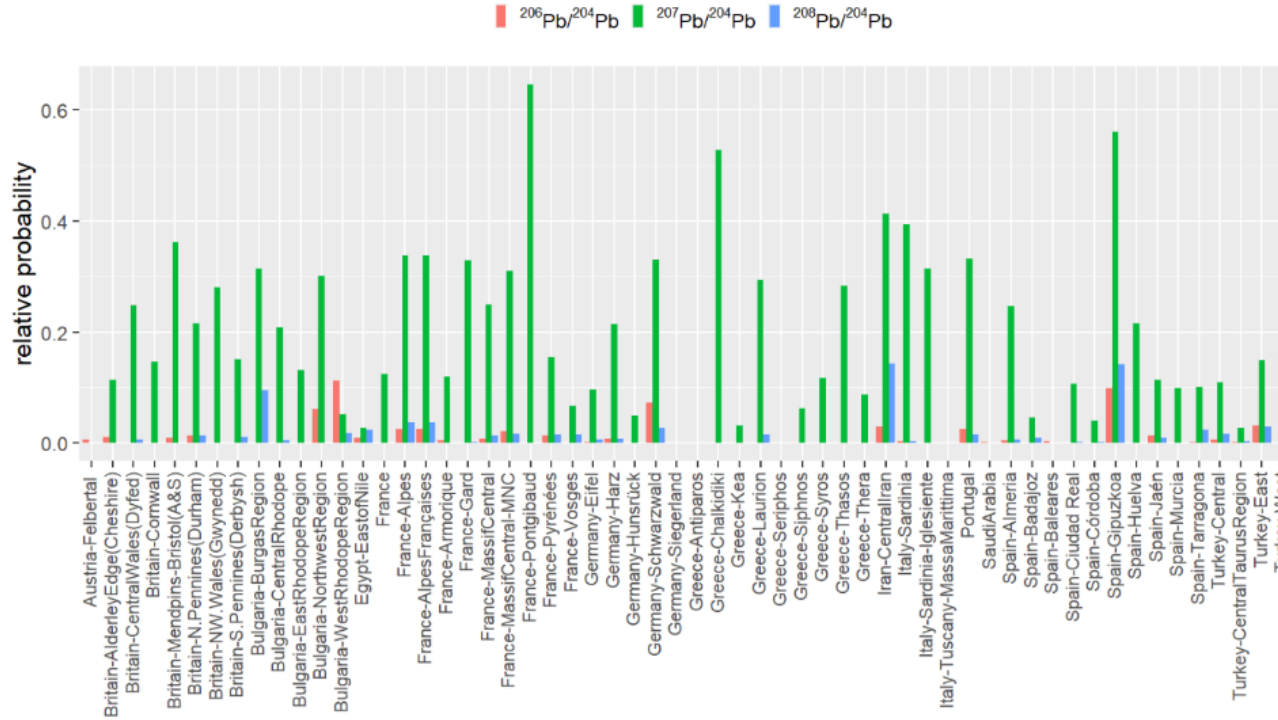

| Mining_Region                  | prob_206 | prob_207 | prob_208 | min>5%? | min |
|--------------------------------|----------|----------|----------|---------|-----|
| Austria-Felbertal              | 1%       | 0%       | 0%       | 0       | 0%  |
| Britain-AlderleyEdge(Cheshire) | 1%       | 11%      | 0%       | 0       | 0%  |
| Britain-CentralWales(Dyfed)    | 0%       | 25%      | 1%       | 0       | 0%  |
| Britain-Cornwall               | 0%       | 15%      | 0%       | 0       | 0%  |
| Britain-Mendpins-Bristol(A&S)  | 1%       | 36%      | 0%       | 0       | 0%  |
| Britain-N.Pennines(Durham)     | 1%       | 22%      | 1%       | 0       | 1%  |
| Britain-NW.Wales(Gwynedd)      | 0%       | 28%      | 0%       | 0       | 0%  |
| Britain-S.Pennines(Derbysh)    | 0%       | 15%      | 1%       | 0       | 0%  |
| Bulgaria-BurgasRegion          | 0%       | 32%      | 9%       | 0       | 0%  |
| Bulgaria-CentralRhodope        | 0%       | 21%      | 0%       | 0       | 0%  |
| Bulgaria-EastRhodopeRegion     | 0%       | 13%      | 0%       | 0       | 0%  |
| Bulgaria-NorthwestRegion       | 6%       | 30%      | 0%       | 0       | 0%  |
| Bulgaria-WestRhodopeRegion     | 11%      | 5%       | 2%       | 0       | 2%  |
| Egypt-EastofNile               | 1%       | 3%       | 2%       | 0       | 1%  |
| France                         | 0%       | 12%      | 0%       | 0       | 0%  |
| France-Alpes                   | 2%       | 34%      | 4%       | 0       | 2%  |
| France-AlpesFrançaises         | 3%       | 34%      | 4%       | 0       | 3%  |
| France-Armorique               | 0%       | 12%      | 0%       | 0       | 0%  |
| France-Gard                    | 0%       | 33%      | 0%       | 0       | 0%  |
| France-MassifCentral           | 1%       | 25%      | 1%       | 0       | 1%  |
| France-MassifCentral-MNC       | 2%       | 31%      | 2%       | 0       | 2%  |
| France-Pontgibaud              | 0%       | 65%      | 0%       | 0       | 0%  |
| France-Pyrénées                | 1%       | 16%      | 1%       | 0       | 1%  |
| France-Vosges                  | 0%       | 7%       | 2%       | 0       | 0%  |
| Germany-Elifel                 | 0%       | 10%      | 1%       | 0       | 0%  |
| Germany-Harz                   | 1%       | 21%      | 1%       | 0       | 1%  |
| Germany-Hunsrück               | 0%       | 5%       | 0%       | 0       | 0%  |
| Germany-Schwarzwald            | 7%       | 33%      | 3%       | 0       | 3%  |
| Germany-Siegerland             | 0%       | 0%       | 0%       | 0       | 0%  |
| Greece-Antiparos               | 0%       | 0%       | 0%       | 0       | 0%  |
| Greece-Chalkidiki              | 0%       | 53%      | 0%       | 0       | 0%  |
| Greece-Kea                     | 0%       | 3%       | 0%       | 0       | 0%  |
| Greece-Laurion                 | 0%       | 29%      | 1%       | 0       | 0%  |
| Greece-Seriphos                | 0%       | 0%       | 0%       | 0       | 0%  |
| Greece-Siphnos                 | 0%       | 6%       | 0%       | 0       | 0%  |
| Greece-Syros                   | 0%       | 12%      | 0%       | 0       | 0%  |
| Greece-Thasos                  | 0%       | 28%      | 0%       | 0       | 0%  |
| Greece-Thera                   | 0%       | 9%       | 0%       | 0       | 0%  |
| Iran-CentralIran               | 3%       | 41%      | 14%      | 0       | 3%  |
| Italy-Sardinia                 | 0%       | 39%      | 0%       | 0       | 0%  |
| Italy-Sardinia-Iglesiente      | 0%       | 31%      | 0%       | 0       | 0%  |
| Italy-Tuscany-MassaMarittima   | 0%       | 0%       | 0%       | 0       | 0%  |
| Portugal                       | 3%       | 33%      | 1%       | 0       | 1%  |
| SaudiArabia                    | 0%       | 0%       | 0%       | 0       | 0%  |
| Spain-Almeria                  | 0%       | 25%      | 1%       | 0       | 0%  |
| Spain-Badajoz                  | 0%       | 5%       | 1%       | 0       | 0%  |
| Spain-Baleares                 | 0%       | 0%       | 0%       | 0       | 0%  |
| Spain-Ciudad Real              | 0%       | 11%      | 0%       | 0       | 0%  |
| Spain-Córdoba                  | 0%       | 4%       | 0%       | 0       | 0%  |
| Spain-Gipuzkoa                 | 10%      | 56%      | 14%      | 1       | 10% |
| Spain-Huelva                   | 0%       | 22%      | 0%       | 0       | 0%  |
| Spain-Jaén                     | 1%       | 11%      | 1%       | 0       | 1%  |
| Spain-Murcia                   | 0%       | 10%      | 0%       | 0       | 0%  |
| Spain-Tarragona                | 0%       | 10%      | 2%       | 0       | 0%  |
| Turkey-Central                 | 1%       | 11%      | 2%       | 0       | 1%  |
| Turkey-CentralTaurusRegion     | 0%       | 3%       | 0%       | 0       | 0%  |
| Turkey-East                    | 3%       | 15%      | 3%       | 0       | 3%  |
| Turkey-West                    | 0%       | 16%      | 1%       | 0       | 0%  |

# 9-Denarius-Maiana

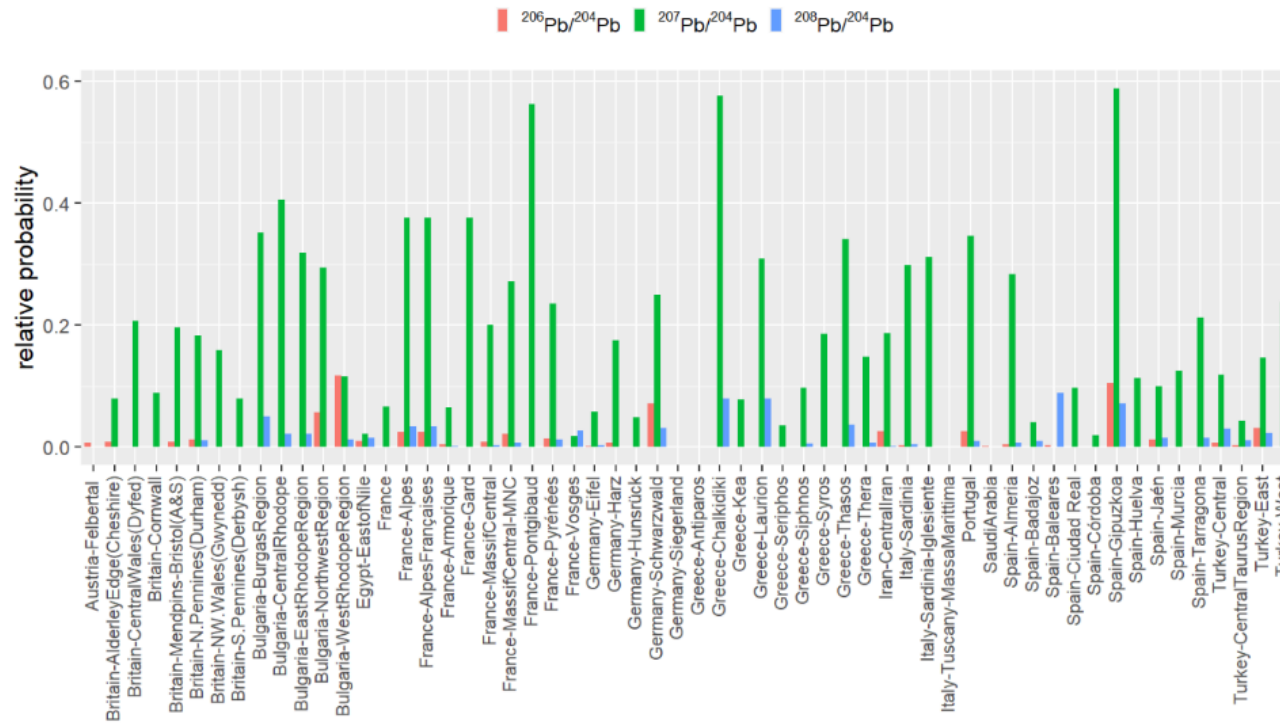

| Mining_Region                  | prob_206 | prob_207 | prob_208 | min>5%? | min |
|--------------------------------|----------|----------|----------|---------|-----|
| Austria-Felbertal              | 1%       | 0%       | 0%       | 0       | 0%  |
| Britain-AlderleyEdge(Cheshire) | 1%       | 8%       | 0%       | 0       | 0%  |
| Britain-CentralWales(Dyfed)    | 0%       | 21%      | 0%       | 0       | 0%  |
| Britain-Cornwall               | 0%       | 9%       | 0%       | 0       | 0%  |
| Britain-Mendips-Bristol(A&S)   | 1%       | 20%      | 0%       | 0       | 0%  |
| Britain-N.Pennines(Durham)     | 1%       | 18%      | 1%       | 0       | 1%  |
| Britain-NW.Wales(Gwynedd)      | 0%       | 16%      | 0%       | 0       | 0%  |
| Britain-S.Pennines(Derbysh)    | 0%       | 8%       | 0%       | 0       | 0%  |
| Bulgaria-BurgasRegion          | 0%       | 35%      | 5%       | 0       | 0%  |
| Bulgaria-CentralRhodope        | 0%       | 41%      | 2%       | 0       | 0%  |
| Bulgaria-EastRhodopeRegion     | 0%       | 32%      | 2%       | 0       | 0%  |
| Bulgaria-NorthwestRegion       | 6%       | 29%      | 0%       | 0       | 0%  |
| Bulgaria-WestRhodopeRegion     | 12%      | 12%      | 1%       | 0       | 1%  |
| Egypt-EastofNile               | 1%       | 2%       | 2%       | 0       | 1%  |
| France                         | 0%       | 7%       | 0%       | 0       | 0%  |
| France-Alpes                   | 2%       | 38%      | 3%       | 0       | 2%  |
| France-AlpesFrançaises         | 2%       | 38%      | 3%       | 0       | 2%  |
| France-Armorique               | 0%       | 6%       | 0%       | 0       | 0%  |
| France-Gard                    | 0%       | 38%      | 0%       | 0       | 0%  |
| France-MassifCentral           | 1%       | 20%      | 0%       | 0       | 0%  |
| France-MassifCentral-MNC       | 2%       | 27%      | 1%       | 0       | 1%  |
| France-Pontgibaud              | 0%       | 56%      | 0%       | 0       | 0%  |
| France-Pyrénées                | 1%       | 23%      | 1%       | 0       | 1%  |
| France-Vosges                  | 0%       | 2%       | 3%       | 0       | 0%  |
| Germany-Eifel                  | 0%       | 6%       | 0%       | 0       | 0%  |
| Germany-Harz                   | 1%       | 17%      | 0%       | 0       | 0%  |
| Germany-Hunsrück               | 0%       | 5%       | 0%       | 0       | 0%  |
| Germany-Schwarzwald            | 7%       | 25%      | 3%       | 0       | 3%  |
| Germany-Siegerland             | 0%       | 0%       | 0%       | 0       | 0%  |
| Greece-Antiparos               | 0%       | 0%       | 0%       | 0       | 0%  |
| Greece-Chalkidiki              | 0%       | 58%      | 8%       | 0       | 0%  |
| Greece-Kea                     | 0%       | 8%       | 0%       | 0       | 0%  |
| Greece-Laurion                 | 0%       | 31%      | 8%       | 0       | 0%  |
| Greece-Seriphos                | 0%       | 4%       | 0%       | 0       | 0%  |
| Greece-Siphnos                 | 0%       | 10%      | 1%       | 0       | 0%  |
| Greece-Syros                   | 0%       | 19%      | 0%       | 0       | 0%  |
| Greece-Thasos                  | 0%       | 34%      | 4%       | 0       | 0%  |
| Greece-Thera                   | 0%       | 15%      | 1%       | 0       | 0%  |
| Iran-Centrallran               | 3%       | 19%      | 0%       | 0       | 0%  |
| Italy-Sardinia                 | 0%       | 30%      | 0%       | 0       | 0%  |
| Italy-Sardinia-Iglesiente      | 0%       | 31%      | 0%       | 0       | 0%  |
| Italy-Tuscany-MassaMarittima   | 0%       | 0%       | 0%       | 0       | 0%  |
| Portugal                       | 3%       | 35%      | 1%       | 0       | 1%  |
| SaudiArabia                    | 0%       | 0%       | 0%       | 0       | 0%  |
| Spain-Almeria                  | 0%       | 28%      | 1%       | 0       | 0%  |
| Spain-Badajoz                  | 0%       | 4%       | 1%       | 0       | 0%  |
| Spain-Baleares                 | 0%       | 0%       | 9%       | 0       | 0%  |
| Spain-Ciudad Real              | 0%       | 10%      | 0%       | 0       | 0%  |
| Spain-Córdoba                  | 0%       | 2%       | 0%       | 0       | 0%  |
| Spain-Gipuzkoa                 | 10%      | 59%      | 7%       | 1       | 7%  |
| Spain-Huelva                   | 0%       | 11%      | 0%       | 0       | 0%  |
| Spain-Jaén                     | 1%       | 10%      | 1%       | 0       | 1%  |
| Spain-Murcia                   | 0%       | 12%      | 0%       | 0       | 0%  |
| Spain-Tarragona                | 0%       | 21%      | 2%       | 0       | 0%  |
| Turkey-Central                 | 1%       | 12%      | 3%       | 0       | 1%  |
| Turkey-CentralTaurusRegion     | 0%       | 4%       | 1%       | 0       | 0%  |
| Turkey-East                    | 3%       | 15%      | 2%       | 0       | 2%  |
| Turkey-West                    | 0%       | 24%      | 4%       | 0       | 0%  |

16-Denarius-60-1

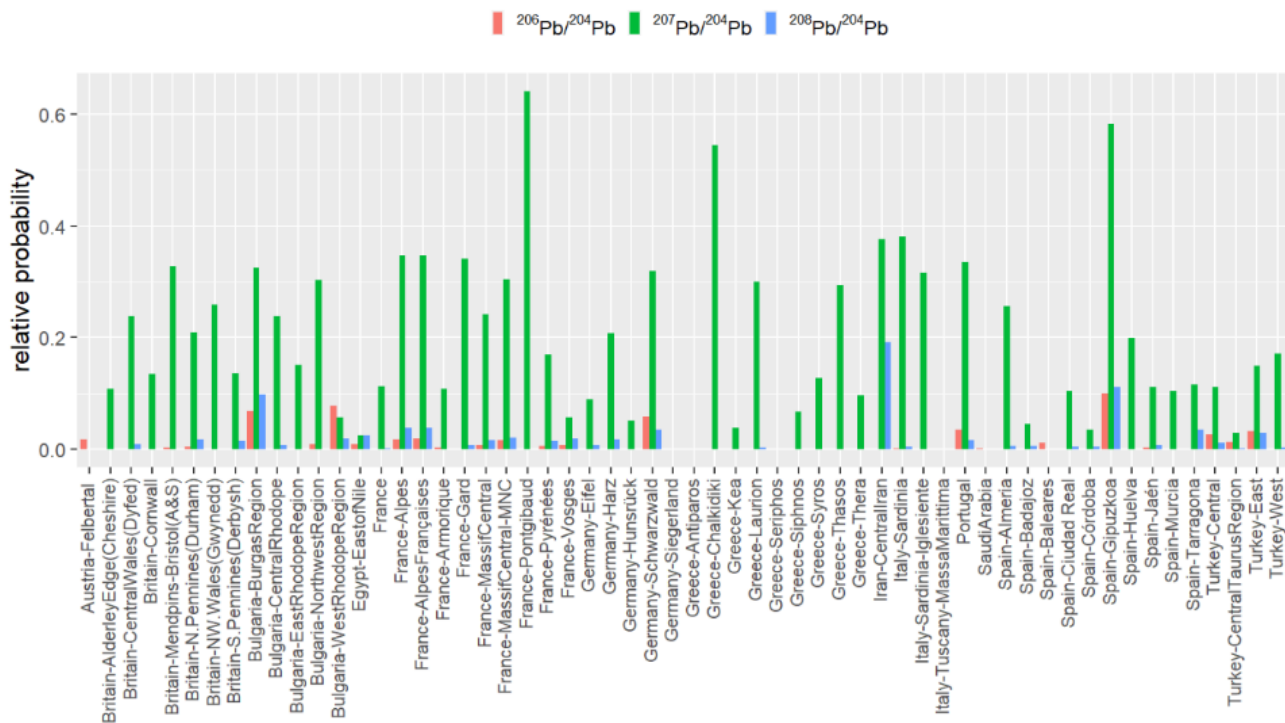

| Mining_Region                  | prob_206 | prob_207 | prob_208 | min>5%? | min |
|--------------------------------|----------|----------|----------|---------|-----|
| Austria-Felbertal              | 2%       | 0%       | 0%       | 0       | 0%  |
| Britain-AlderleyEdge(Cheshire) | 0%       | 11%      | 0%       | 0       | 0%  |
| Britain-CentralWales(Dyfed)    | 0%       | 24%      | 1%       | 0       | 0%  |
| Britain-Cornwall               | 0%       | 14%      | 0%       | 0       | 0%  |
| Britain-Mendpins-Bristol(A&S)  | 0%       | 33%      | 0%       | 0       | 0%  |
| Britain-N.Pennines(Durham)     | 0%       | 21%      | 2%       | 0       | 0%  |
| Britain-NW.Wales(Gwynedd)      | 0%       | 26%      | 0%       | 0       | 0%  |
| Britain-S.Pennines(Derbysh)    | 0%       | 14%      | 1%       | 0       | 0%  |
| Bulgaria-BurgasRegion          | 7%       | 33%      | 10%      | 1       | 7%  |
| Bulgaria-CentralRhodope        | 0%       | 24%      | 1%       | 0       | 0%  |
| Bulgaria-EastRhodopeRegion     | 0%       | 15%      | 0%       | 0       | 0%  |
| Bulgaria-NorthwestRegion       | 1%       | 30%      | 0%       | 0       | 0%  |
| Bulgaria-WestRhodopeRegion     | 8%       | 6%       | 2%       | 0       | 2%  |
| Egypt-EastofNile               | 1%       | 3%       | 2%       | 0       | 1%  |
| France                         | 0%       | 11%      | 0%       | 0       | 0%  |
| France-Alpes                   | 2%       | 35%      | 4%       | 0       | 2%  |
| France-AlpesFrançaises         | 2%       | 35%      | 4%       | 0       | 2%  |
| France-Armorique               | 0%       | 11%      | 0%       | 0       | 0%  |
| France-Gard                    | 0%       | 34%      | 1%       | 0       | 0%  |
| France-MassifCentral           | 1%       | 24%      | 2%       | 0       | 1%  |
| France-MassifCentral-MNC       | 2%       | 30%      | 2%       | 0       | 2%  |
| France-Pontgibaud              | 0%       | 64%      | 0%       | 0       | 0%  |
| France-Pyrénées                | 1%       | 17%      | 2%       | 0       | 1%  |
| France-Vosges                  | 1%       | 6%       | 2%       | 0       | 1%  |
| Germany-Eifel                  | 0%       | 9%       | 1%       | 0       | 0%  |
| Germany-Harz                   | 0%       | 21%      | 2%       | 0       | 0%  |
| Germany-Hunsrück               | 0%       | 5%       | 0%       | 0       | 0%  |
| Germany-Schwarzwald            | 6%       | 32%      | 3%       | 0       | 3%  |
| Germany-Siegerland             | 0%       | 0%       | 0%       | 0       | 0%  |
| Greece-Anliparos               | 0%       | 0%       | 0%       | 0       | 0%  |
| Greece-Chalkidiki              | 0%       | 0%       | 0%       | 0       | 0%  |
| Greece-Kea                     | 0%       | 0%       | 0%       | 0       | 0%  |
| Greece-Laurion                 | 0%       | 54%      | 0%       | 0       | 0%  |
| Greece-Seriphos                | 0%       | 4%       | 0%       | 0       | 0%  |
| Greece-Siphnos                 | 0%       | 30%      | 0%       | 0       | 0%  |
| Greece-Syros                   | 0%       | 0%       | 0%       | 0       | 0%  |
| Greece-Thasos                  | 0%       | 7%       | 0%       | 0       | 0%  |
| Greece-Thera                   | 0%       | 13%      | 0%       | 0       | 0%  |
| Iran-Centrallran               | 0%       | 38%      | 19%      | 0       | 0%  |
| Italy-Sardinia-Iglesiente      | 0%       | 38%      | 0%       | 0       | 0%  |
| Italy-Sardinia-Iglesiente      | 0%       | 32%      | 0%       | 0       | 0%  |
| Italy-Tuscany-MassaMarittima   | 0%       | 0%       | 0%       | 0       | 0%  |
| Portugal                       | 4%       | 34%      | 2%       | 0       | 2%  |
| SaudiArabia                    | 0%       | 0%       | 0%       | 0       | 0%  |
| Spain-Almeria                  | 0%       | 26%      | 1%       | 0       | 0%  |
| Spain-Badajoz                  | 0%       | 5%       | 1%       | 0       | 0%  |
| Spain-Baleares                 | 1%       | 0%       | 0%       | 0       | 0%  |
| Spain-Ciudad Real              | 0%       | 10%      | 0%       | 0       | 0%  |
| Spain-Córdoba                  | 0%       | 4%       | 0%       | 0       | 0%  |
| Spain-Gipuzkoa                 | 10%      | 58%      | 11%      | 1       | 10% |
| Spain-Huelva                   | 0%       | 20%      | 0%       | 0       | 0%  |
| Spain-Jaén                     | 0%       | 11%      | 1%       | 0       | 0%  |
| Spain-Murcia                   | 0%       | 10%      | 0%       | 0       | 0%  |
| Spain-Tarragona                | 0%       | 12%      | 4%       | 0       | 0%  |
| Turkey-Central                 | 3%       | 11%      | 1%       | 0       | 1%  |
| Turkey-CentralTaurusRegion     | 1%       | 3%       | 0%       | 0       | 0%  |
| Turkey-East                    | 3%       | 15%      | 3%       | 0       | 3%  |
| Turkey-West                    | 0%       | 17%      | 0%       | 0       | 0%  |



# 18-Denarius-58-2

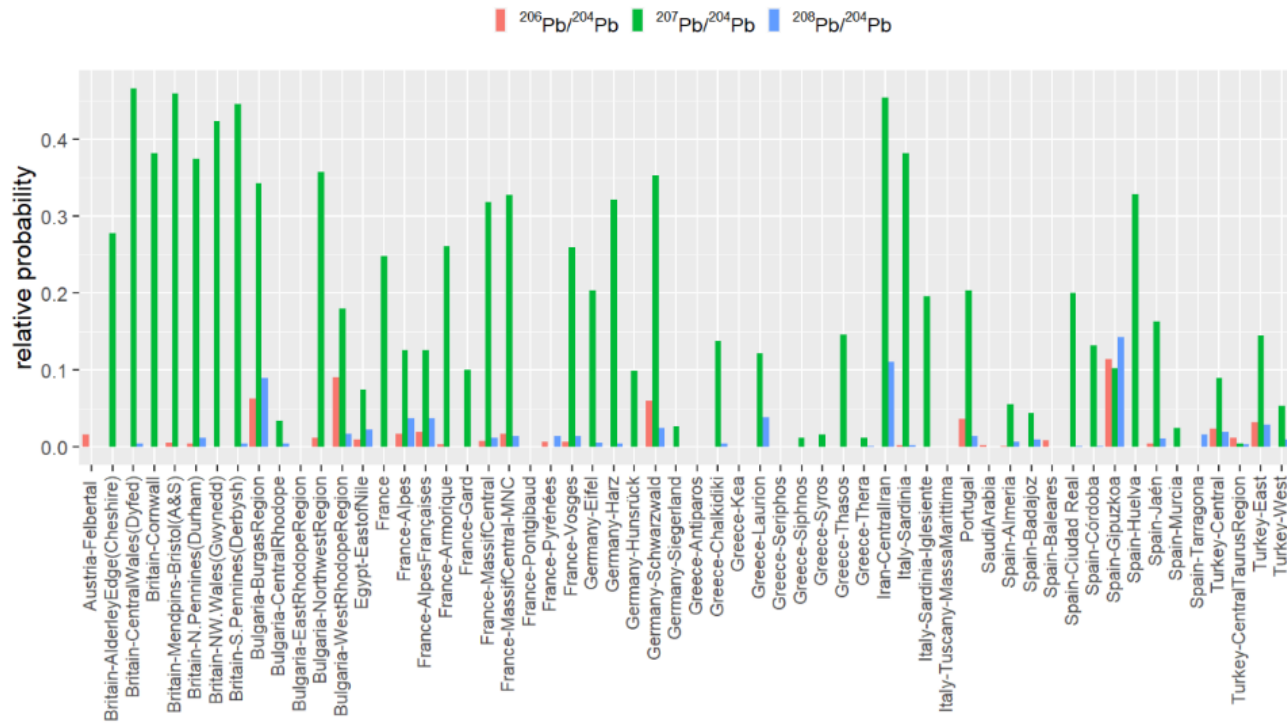

| Mining_Region                  | prob_206 | prob_207 | prob_208 | min>5%? | min |
|--------------------------------|----------|----------|----------|---------|-----|
| Austria-Felbertal              | 2%       | 0%       | 0%       | 0       | 0%  |
| Britain-AlderleyEdge(Cheshire) | 0%       | 28%      | 0%       | 0       | 0%  |
| Britain-CentralWales(Dyfed)    | 0%       | 47%      | 0%       | 0       | 0%  |
| Britain-Cornwall               | 0%       | 38%      | 0%       | 0       | 0%  |
| Britain-Mendips-Bristol(A&S)   | 1%       | 46%      | 0%       | 0       | 0%  |
| Britain-N.Pennines(Durham)     | 0%       | 37%      | 1%       | 0       | 0%  |
| Britain-NW.Wales(Gwynedd)      | 0%       | 42%      | 0%       | 0       | 0%  |
| Britain-S.Pennines(Derbysh)    | 0%       | 45%      | 0%       | 0       | 0%  |
| Bulgaria-BurgasRegion          | 6%       | 34%      | 9%       | 1       | 6%  |
| Bulgaria-CentralRhodope        | 0%       | 3%       | 0%       | 0       | 0%  |
| Bulgaria-EastRhodopeRegion     | 0%       | 0%       | 0%       | 0       | 0%  |
| Bulgaria-NorthwestRegion       | 1%       | 36%      | 0%       | 0       | 0%  |
| Bulgaria-WestRhodopeRegion     | 9%       | 18%      | 2%       | 0       | 2%  |
| Egypt-EastofNile               | 1%       | 7%       | 2%       | 0       | 1%  |
| France                         | 0%       | 25%      | 0%       | 0       | 0%  |
| France-Alpes                   | 2%       | 13%      | 4%       | 0       | 2%  |
| France-AlpesFrançaises         | 2%       | 13%      | 4%       | 0       | 2%  |
| France-Armorique               | 0%       | 26%      | 0%       | 0       | 0%  |
| France-Gard                    | 0%       | 10%      | 0%       | 0       | 0%  |
| France-MassifCentral           | 1%       | 32%      | 1%       | 0       | 1%  |
| France-MassifCentral-MNC       | 2%       | 33%      | 1%       | 0       | 1%  |
| France-Pontgibaud              | 0%       | 0%       | 0%       | 0       | 0%  |
| France-Pyrénées                | 1%       | 0%       | 1%       | 0       | 0%  |
| France-Vosges                  | 1%       | 26%      | 1%       | 0       | 1%  |
| Germany-Eifel                  | 0%       | 20%      | 1%       | 0       | 0%  |
| Germany-Harz                   | 0%       | 32%      | 0%       | 0       | 0%  |
| Germany-Hunsrück               | 0%       | 10%      | 0%       | 0       | 0%  |
| Germany-Schwarzwald            | 6%       | 35%      | 2%       | 0       | 2%  |
| Germany-Siegerland             | 0%       | 3%       | 0%       | 0       | 0%  |
| Greece-Antiparos               | 0%       | 0%       | 0%       | 0       | 0%  |
| Greece-Chalkidiki              | 0%       | 14%      | 0%       | 0       | 0%  |
| Greece-Kea                     | 0%       | 0%       | 0%       | 0       | 0%  |
| Greece-Laurion                 | 0%       | 12%      | 4%       | 0       | 0%  |
| Greece-Seriphos                | 0%       | 0%       | 0%       | 0       | 0%  |
| Greece-Siphnos                 | 0%       | 1%       | 0%       | 0       | 0%  |
| Greece-Siphnos                 | 0%       | 2%       | 0%       | 0       | 0%  |
| Greece-Thasos                  | 0%       | 15%      | 0%       | 0       | 0%  |
| Greece-Thera                   | 0%       | 1%       | 0%       | 0       | 0%  |
| Iran-Centrallran               | 0%       | 45%      | 11%      | 0       | 0%  |
| Italy-Sardinia                 | 0%       | 38%      | 0%       | 0       | 0%  |
| Italy-Sardinia-Iglesiente      | 0%       | 20%      | 0%       | 0       | 0%  |
| Italy-Tuscany-MassaMarittima   | 0%       | 0%       | 0%       | 0       | 0%  |
| Portugal                       | 4%       | 20%      | 1%       | 0       | 1%  |
| SaudiArabia                    | 0%       | 0%       | 0%       | 0       | 0%  |
| Spain-Almeria                  | 0%       | 6%       | 1%       | 0       | 0%  |
| Spain-Badajoz                  | 0%       | 4%       | 1%       | 0       | 0%  |
| Spain-Baleares                 | 1%       | 0%       | 0%       | 0       | 0%  |
| Spain-Ciudad Real              | 0%       | 20%      | 0%       | 0       | 0%  |
| Spain-Córdoba                  | 0%       | 13%      | 0%       | 0       | 0%  |
| Spain-Gipuzkoa                 | 11%      | 10%      | 14%      | 1       | 10% |
| Spain-Huelva                   | 0%       | 33%      | 0%       | 0       | 0%  |
| Spain-Jaén                     | 0%       | 16%      | 1%       | 0       | 0%  |
| Spain-Murcia                   | 0%       | 2%       | 0%       | 0       | 0%  |
| Spain-Tarragona                | 0%       | 0%       | 2%       | 0       | 0%  |
| Turkey-Central                 | 2%       | 9%       | 2%       | 0       | 2%  |
| Turkey-CentralTaurusRegion     | 1%       | 0%       | 0%       | 0       | 0%  |
| Turkey-East                    | 3%       | 14%      | 3%       | 0       | 3%  |
| Turkey-West                    | 0%       | 5%       | 1%       | 0       | 0%  |

21-Janus-29-3

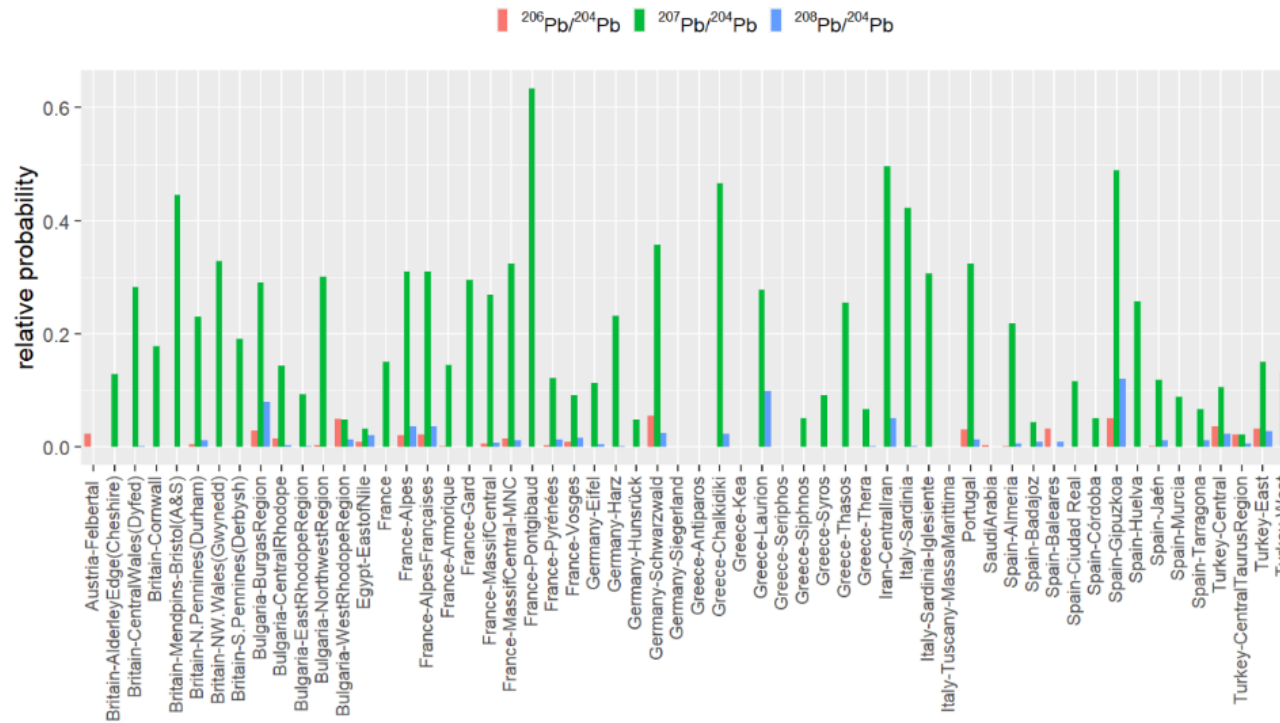

| Mining_Region                  | prob_206 | prob_207 | prob_208 | min>5%? | min |
|--------------------------------|----------|----------|----------|---------|-----|
| Austria-Felbertal              | 2%       | 0%       | 0%       | 0       | 0%  |
| Britain-AlderleyEdge(Cheshire) | 0%       | 13%      | 0%       | 0       | 0%  |
| Britain-CentralWales(Dyfed)    | 0%       | 28%      | 0%       | 0       | 0%  |
| Britain-Cornwall               | 0%       | 18%      | 0%       | 0       | 0%  |
| Britain-Mendips-Bristol(A&S)   | 0%       | 45%      | 0%       | 0       | 0%  |
| Britain-N. Pennines(Durham)    | 0%       | 23%      | 1%       | 0       | 0%  |
| Britain-NW. Wales(Gwynedd)     | 0%       | 33%      | 0%       | 0       | 0%  |
| Britain-S. Pennines(Derbysh)   | 0%       | 19%      | 0%       | 0       | 0%  |
| Bulgaria-BurgasRegion          | 3%       | 29%      | 8%       | 0       | 3%  |
| Bulgaria-CentralRhodope        | 1%       | 14%      | 0%       | 0       | 0%  |
| Bulgaria-EastRhodopeRegion     | 0%       | 9%       | 0%       | 0       | 0%  |
| Bulgaria-NorthwestRegion       | 0%       | 30%      | 0%       | 0       | 0%  |
| Bulgaria-WestRhodopeRegion     | 5%       | 5%       | 1%       | 0       | 1%  |
| Egypt-EastofNile               | 1%       | 3%       | 2%       | 0       | 1%  |
| France                         | 0%       | 15%      | 0%       | 0       | 0%  |
| France-Alpes                   | 2%       | 31%      | 4%       | 0       | 2%  |
| France-AlpesFrançaises         | 2%       | 31%      | 4%       | 0       | 2%  |
| France-Armorique               | 0%       | 14%      | 0%       | 0       | 0%  |
| France-Gard                    | 0%       | 30%      | 0%       | 0       | 0%  |
| France-MassifCentral           | 1%       | 27%      | 1%       | 0       | 1%  |
| France-MassifCentral-MNC       | 1%       | 32%      | 1%       | 0       | 1%  |
| France-Pontgibaud              | 0%       | 63%      | 0%       | 0       | 0%  |
| France-Pyrénées                | 0%       | 12%      | 1%       | 0       | 0%  |
| France-Vosges                  | 1%       | 9%       | 2%       | 0       | 1%  |
| Germany-Eifel                  | 0%       | 11%      | 0%       | 0       | 0%  |
| Germany-Harz                   | 0%       | 23%      | 0%       | 0       | 0%  |
| Germany-Hunsrück               | 0%       | 5%       | 0%       | 0       | 0%  |
| Germany-Schwarzwald            | 5%       | 36%      | 3%       | 0       | 3%  |
| Germany-Siegerland             | 0%       | 0%       | 0%       | 0       | 0%  |
| Greece-Antiparos               | 0%       | 0%       | 0%       | 0       | 0%  |
| Greece-Chalkidiki              | 0%       | 47%      | 2%       | 0       | 0%  |
| Greece-Kea                     | 0%       | 0%       | 0%       | 0       | 0%  |
| Greece-Laurion                 | 0%       | 28%      | 10%      | 0       | 0%  |
| Greece-Seriphos                | 0%       | 0%       | 0%       | 0       | 0%  |
| Greece-Siphnos                 | 0%       | 5%       | 0%       | 0       | 0%  |
| Greece-Syros                   | 0%       | 9%       | 0%       | 0       | 0%  |
| Greece-Thasos                  | 0%       | 26%      | 0%       | 0       | 0%  |
| Greece-Thera                   | 0%       | 7%       | 0%       | 0       | 0%  |
| Iran-Centrallran               | 0%       | 50%      | 5%       | 0       | 0%  |
| Italy-Sardinia                 | 0%       | 42%      | 0%       | 0       | 0%  |
| Italy-Sardinia-Iglesiente      | 0%       | 31%      | 0%       | 0       | 0%  |
| Italy-Tuscany-MassaMarittima   | 0%       | 0%       | 0%       | 0       | 0%  |
| Portugal                       | 3%       | 32%      | 1%       | 0       | 1%  |
| SaudiArabia                    | 0%       | 0%       | 0%       | 0       | 0%  |
| Spain-Almeria                  | 0%       | 22%      | 1%       | 0       | 0%  |
| Spain-Badajoz                  | 0%       | 4%       | 1%       | 0       | 0%  |
| Spain-Baleares                 | 3%       | 0%       | 1%       | 0       | 0%  |
| Spain-Ciudad Real              | 0%       | 12%      | 0%       | 0       | 0%  |
| Spain-Córdoba                  | 0%       | 5%       | 0%       | 0       | 0%  |
| Spain-Gipuzkoa                 | 5%       | 49%      | 12%      | 1       | 5%  |
| Spain-Huelva                   | 0%       | 26%      | 0%       | 0       | 0%  |
| Spain-Jaén                     | 0%       | 12%      | 1%       | 0       | 0%  |
| Spain-Murcia                   | 0%       | 9%       | 0%       | 0       | 0%  |
| Spain-Tarragona                | 0%       | 7%       | 1%       | 0       | 0%  |
| Turkey-Central                 | 4%       | 11%      | 2%       | 0       | 2%  |
| Turkey-CentralTaurusRegion     | 2%       | 2%       | 1%       | 0       | 1%  |
| Turkey-East                    | 3%       | 15%      | 3%       | 0       | 3%  |
| Turkey-West                    | 0%       | 13%      | 2%       | 0       | 0%  |

MS017

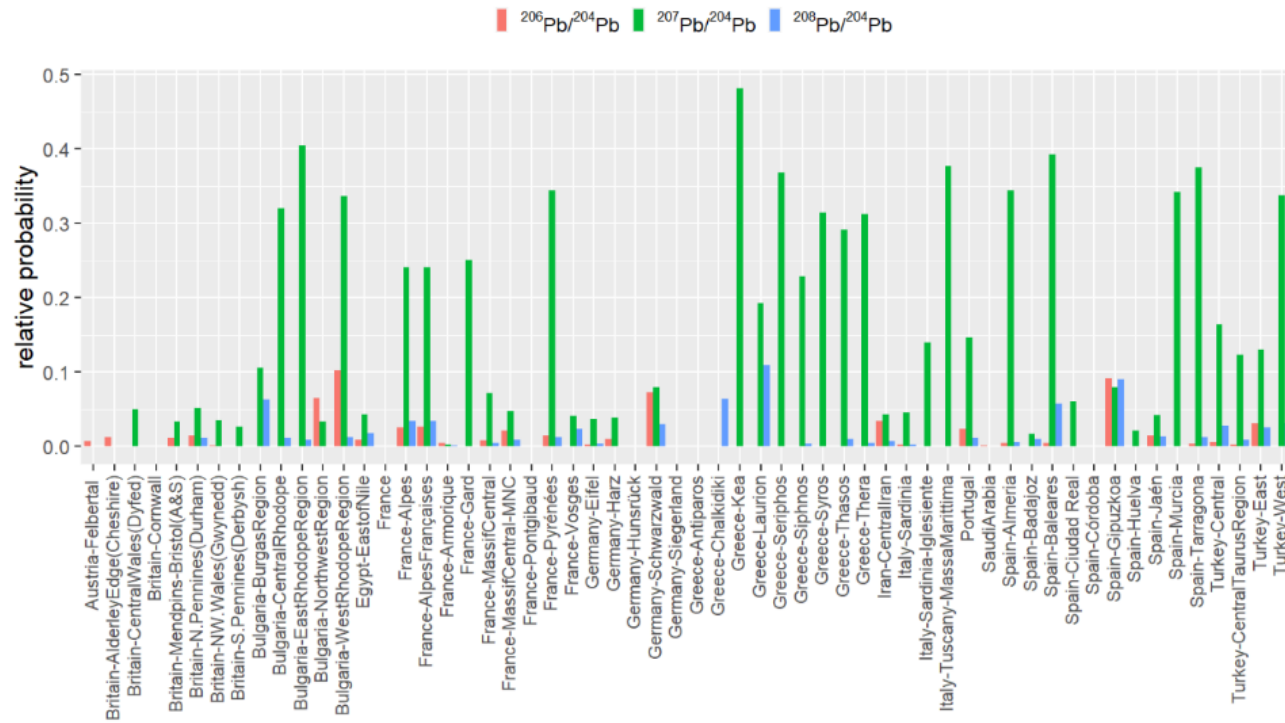

| Mining_Region                  | prob_206 | prob_207 | prob_208 | min>5%? | min |
|--------------------------------|----------|----------|----------|---------|-----|
| Austria-Felbertal              | 1%       | 0%       | 0%       | 0       | 0%  |
| Britain-AlderleyEdge(Cheshire) | 1%       | 0%       | 0%       | 0       | 0%  |
| Britain-CentralWales(Dyfed)    | 0%       | 5%       | 0%       | 0       | 0%  |
| Britain-Cornwall               | 0%       | 0%       | 0%       | 0       | 0%  |
| Britain-Mendips-Bristol(A&S)   | 1%       | 3%       | 0%       | 0       | 0%  |
| Britain-N.Pennines(Durham)     | 1%       | 5%       | 1%       | 0       | 1%  |
| Britain-NW.Wales(Gwynedd)      | 0%       | 4%       | 0%       | 0       | 0%  |
| Britain-S.Pennines(Derbysh)    | 0%       | 3%       | 0%       | 0       | 0%  |
| Bulgaria-BurgasRegion          | 0%       | 11%      | 6%       | 0       | 0%  |
| Bulgaria-CentralRhodope        | 0%       | 32%      | 1%       | 0       | 0%  |
| Bulgaria-EastRhodopeRegion     | 0%       | 40%      | 1%       | 0       | 0%  |
| Bulgaria-NorthwestRegion       | 6%       | 3%       | 0%       | 0       | 0%  |
| Bulgaria-WestRhodopeRegion     | 10%      | 34%      | 1%       | 0       | 1%  |
| Egypt-EastofNile               | 1%       | 4%       | 2%       | 0       | 1%  |
| France                         | 0%       | 0%       | 0%       | 0       | 0%  |
| France-Alpes                   | 3%       | 24%      | 3%       | 0       | 3%  |
| France-AlpesFrançaises         | 3%       | 24%      | 3%       | 0       | 3%  |
| France-Armorique               | 0%       | 0%       | 0%       | 0       | 0%  |
| France-Gard                    | 0%       | 25%      | 0%       | 0       | 0%  |
| France-MassifCentral           | 1%       | 7%       | 0%       | 0       | 0%  |
| France-MassifCentral-MNC       | 2%       | 5%       | 1%       | 0       | 1%  |
| France-Pontgibaud              | 0%       | 0%       | 0%       | 0       | 0%  |
| France-Pyrénées                | 1%       | 34%      | 1%       | 0       | 1%  |
| France-Vosges                  | 0%       | 4%       | 2%       | 0       | 0%  |
| Germany-Eifel                  | 0%       | 4%       | 0%       | 0       | 0%  |
| Germany-Harz                   | 1%       | 4%       | 0%       | 0       | 0%  |
| Germany-Hunsrück               | 0%       | 0%       | 0%       | 0       | 0%  |
| Germany-Schwarzwald            | 7%       | 8%       | 3%       | 0       | 3%  |
| Germany-Siegerland             | 0%       | 0%       | 0%       | 0       | 0%  |
| Greece-Antiparos               | 0%       | 0%       | 0%       | 0       | 0%  |
| Greece-Chalkidiki              | 0%       | 0%       | 6%       | 0       | 0%  |
| Greece-Kea                     | 0%       | 48%      | 0%       | 0       | 0%  |
| Greece-Laurion                 | 0%       | 19%      | 11%      | 0       | 0%  |
| Greece-Seriphos                | 0%       | 37%      | 0%       | 0       | 0%  |
| Greece-Siphnos                 | 0%       | 23%      | 0%       | 0       | 0%  |
| Greece-Syros                   | 0%       | 31%      | 0%       | 0       | 0%  |
| Greece-Thasos                  | 0%       | 29%      | 1%       | 0       | 0%  |
| Greece-Thera                   | 0%       | 31%      | 0%       | 0       | 0%  |
| Iran-Centrallran               | 0%       | 31%      | 0%       | 0       | 0%  |
| Italy-Sardinia-Iglesiente      | 3%       | 4%       | 1%       | 0       | 1%  |
| Italy-Tuscany-MassaMarittima   | 0%       | 5%       | 0%       | 0       | 0%  |
| Italy-Sardinia-Iglesiente      | 0%       | 14%      | 0%       | 0       | 0%  |
| Italy-Tuscany-MassaMarittima   | 0%       | 38%      | 0%       | 0       | 0%  |
| Portugal                       | 2%       | 15%      | 1%       | 0       | 1%  |
| SaudiArabia                    | 0%       | 0%       | 0%       | 0       | 0%  |
| Spain-Almeria                  | 0%       | 34%      | 1%       | 0       | 0%  |
| Spain-Badajoz                  | 0%       | 2%       | 1%       | 0       | 0%  |
| Spain-Baleares                 | 0%       | 39%      | 6%       | 0       | 0%  |
| Spain-Ciudad Real              | 0%       | 6%       | 0%       | 0       | 0%  |
| Spain-Córdoba                  | 0%       | 0%       | 0%       | 0       | 0%  |
| Spain-Gipuzkoa                 | 9%       | 8%       | 9%       | 1       | 8%  |
| Spain-Huelva                   | 0%       | 2%       | 0%       | 0       | 0%  |
| Spain-Jaén                     | 1%       | 4%       | 1%       | 0       | 1%  |
| Spain-Murcia                   | 0%       | 34%      | 0%       | 0       | 0%  |
| Spain-Tarragona                | 0%       | 37%      | 1%       | 0       | 0%  |
| Turkey-Central                 | 1%       | 16%      | 3%       | 0       | 1%  |
| Turkey-CentralTaurusRegion     | 0%       | 12%      | 1%       | 0       | 0%  |
| Turkey-East                    | 3%       | 13%      | 3%       | 0       | 3%  |
| Turkey-West                    | 0%       | 34%      | 3%       | 0       | 0%  |

MS025

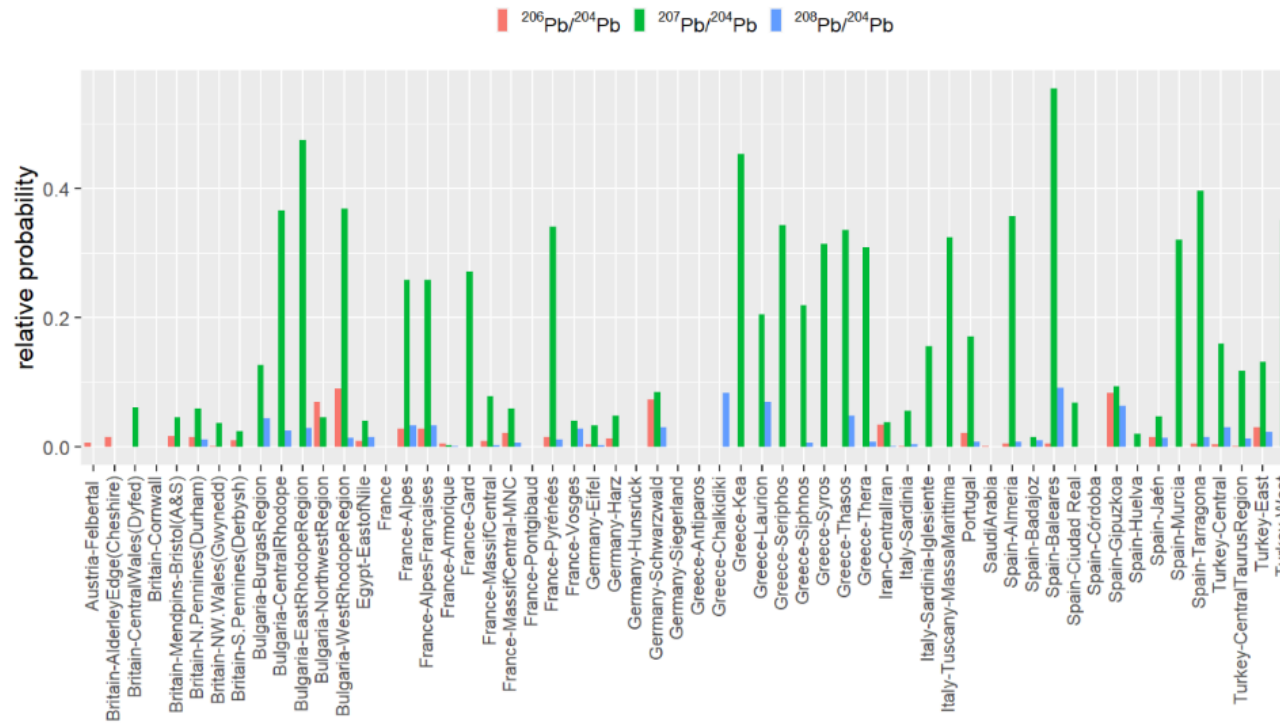

| Mining_Region                  | prob_206 | prob_207 | prob_208 | min>5%? | min |
|--------------------------------|----------|----------|----------|---------|-----|
| Austria-Felbertal              | 1%       | 0%       | 0%       | 0       | 0%  |
| Britain-AlderleyEdge(Cheshire) | 2%       | 0%       | 0%       | 0       | 0%  |
| Britain-CentralWales(Dyfed)    | 0%       | 6%       | 0%       | 0       | 0%  |
| Britain-Cornwall               | 0%       | 0%       | 0%       | 0       | 0%  |
| Britain-Mendpins-Bristol(A&S)  | 2%       | 5%       | 0%       | 0       | 0%  |
| Britain-N.Pennines(Durham)     | 2%       | 6%       | 1%       | 0       | 1%  |
| Britain-NW.Wales(Gwynedd)      | 0%       | 4%       | 0%       | 0       | 0%  |
| Britain-S.Pennines(Derbysh)    | 1%       | 2%       | 0%       | 0       | 0%  |
| Bulgaria-BurgasRegion          | 0%       | 13%      | 4%       | 0       | 0%  |
| Bulgaria-CentralRhodope        | 0%       | 37%      | 3%       | 0       | 0%  |
| Bulgaria-EastRhodopeRegion     | 0%       | 48%      | 3%       | 0       | 0%  |
| Bulgaria-NorthwestRegion       | 7%       | 5%       | 0%       | 0       | 0%  |
| Bulgaria-WestRhodopeRegion     | 9%       | 37%      | 1%       | 0       | 1%  |
| Egypt-EastofNile               | 1%       | 4%       | 1%       | 0       | 1%  |
| France                         | 0%       | 0%       | 0%       | 0       | 0%  |
| France-Alpes                   | 3%       | 26%      | 3%       | 0       | 3%  |
| France-AlpesFrançaises         | 3%       | 26%      | 3%       | 0       | 3%  |
| France-Armorique               | 0%       | 0%       | 0%       | 0       | 0%  |
| France-Gard                    | 0%       | 27%      | 0%       | 0       | 0%  |
| France-MassifCentral           | 1%       | 8%       | 0%       | 0       | 0%  |
| France-MassifCentral-MNC       | 2%       | 6%       | 1%       | 0       | 1%  |
| France-Pontgibaud              | 0%       | 0%       | 0%       | 0       | 0%  |
| France-Pyrénées                | 1%       | 34%      | 1%       | 0       | 1%  |
| France-Vosges                  | 0%       | 4%       | 3%       | 0       | 0%  |
| Germany-Eifel                  | 0%       | 3%       | 0%       | 0       | 0%  |
| Germany-Harz                   | 1%       | 5%       | 0%       | 0       | 0%  |
| Germany-Hunsrück               | 0%       | 0%       | 0%       | 0       | 0%  |
| Germany-Schwarzwald            | 7%       | 8%       | 3%       | 0       | 3%  |
| Germany-Siegerland             | 0%       | 0%       | 0%       | 0       | 0%  |
| Greece-Antiparos               | 0%       | 0%       | 0%       | 0       | 0%  |
| Greece-Chalkidiki              | 0%       | 0%       | 8%       | 0       | 0%  |
| Greece-Kea                     | 0%       | 45%      | 0%       | 0       | 0%  |
| Greece-Laurion                 | 0%       | 21%      | 7%       | 0       | 0%  |
| Greece-Seriphos                | 0%       | 34%      | 0%       | 0       | 0%  |
| Greece-Siphnos                 | 0%       | 22%      | 1%       | 0       | 0%  |
| Greece-Syros                   | 0%       | 31%      | 0%       | 0       | 0%  |
| Greece-Thasos                  | 0%       | 34%      | 5%       | 0       | 0%  |
| Greece-Thera                   | 0%       | 31%      | 1%       | 0       | 0%  |
| Iran-Centrallran               | 3%       | 4%       | 0%       | 0       | 0%  |
| Italy-Sardinia                 | 0%       | 6%       | 0%       | 0       | 0%  |
| Italy-Sardinia-Iglesiente      | 0%       | 16%      | 0%       | 0       | 0%  |
| Italy-Tuscany-MassaMarittima   | 0%       | 32%      | 0%       | 0       | 0%  |
| Portugal                       | 2%       | 17%      | 1%       | 0       | 1%  |
| SaudiArabia                    | 0%       | 0%       | 0%       | 0       | 0%  |
| Spain-Almeria                  | 0%       | 36%      | 1%       | 0       | 0%  |
| Spain-Badajoz                  | 0%       | 2%       | 1%       | 0       | 0%  |
| Spain-Baleares                 | 1%       | 55%      | 9%       | 0       | 1%  |
| Spain-Ciudad Real              | 0%       | 7%       | 0%       | 0       | 0%  |
| Spain-Córdoba                  | 0%       | 0%       | 0%       | 0       | 0%  |
| Spain-Gipuzkoa                 | 8%       | 9%       | 6%       | 1       | 6%  |
| Spain-Huelva                   | 0%       | 2%       | 0%       | 0       | 0%  |
| Spain-Jaén                     | 2%       | 5%       | 1%       | 0       | 1%  |
| Spain-Murcia                   | 0%       | 32%      | 0%       | 0       | 0%  |
| Spain-Tarragona                | 0%       | 40%      | 2%       | 0       | 0%  |
| Turkey-Central                 | 0%       | 16%      | 3%       | 0       | 0%  |
| Turkey-CentralTaurusRegion     | 0%       | 12%      | 1%       | 0       | 0%  |
| Turkey-East                    | 3%       | 13%      | 2%       | 0       | 2%  |
| Turkey-West                    | 0%       | 35%      | 4%       | 0       | 0%  |

MS026

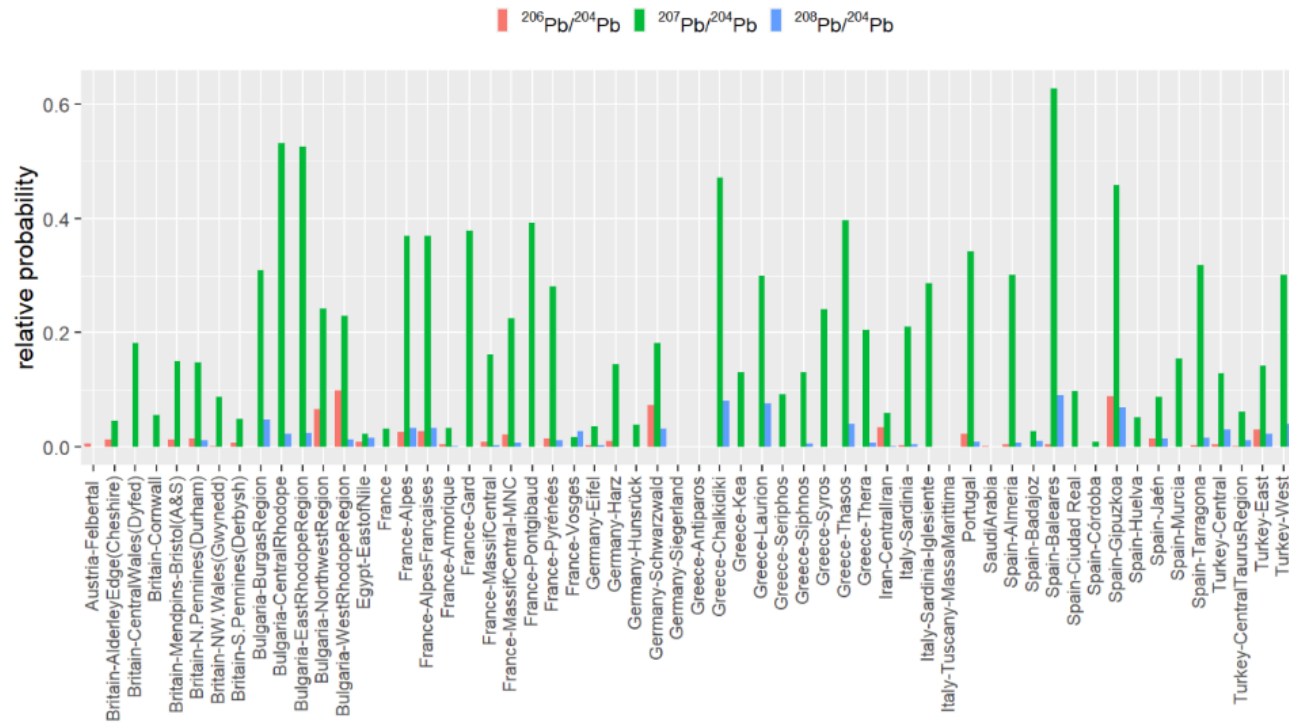

| Mining_Region                  | prob_206 | prob_207 | prob_208 | min>5%? | min |
|--------------------------------|----------|----------|----------|---------|-----|
| Austria-Felbertal              | 1%       | 0%       | 0%       | 0       | 0%  |
| Britain-AlderleyEdge(Cheshire) | 1%       | 5%       | 0%       | 0       | 0%  |
| Britain-CentralWales(Dyfed)    | 0%       | 18%      | 0%       | 0       | 0%  |
| Britain-Cornwall               | 0%       | 6%       | 0%       | 0       | 0%  |
| Britain-Mendpins-Bristol(A&S)  | 1%       | 15%      | 0%       | 0       | 0%  |
| Britain-N. Pennines(Durham)    | 1%       | 15%      | 1%       | 0       | 1%  |
| Britain-NW. Wales(Gwynedd)     | 0%       | 9%       | 0%       | 0       | 0%  |
| Britain-S. Pennines(Derbysh)   | 1%       | 5%       | 0%       | 0       | 0%  |
| Bulgaria-BurgasRegion          | 0%       | 31%      | 5%       | 0       | 0%  |
| Bulgaria-CentralRhodope        | 0%       | 53%      | 2%       | 0       | 0%  |
| Bulgaria-EastRhodopeRegion     | 0%       | 53%      | 2%       | 0       | 0%  |
| Bulgaria-NorthwestRegion       | 7%       | 24%      | 0%       | 0       | 0%  |
| Bulgaria-WestRhodopeRegion     | 10%      | 23%      | 1%       | 0       | 1%  |
| Egypt-EastofNile               | 1%       | 2%       | 2%       | 0       | 1%  |
| France                         | 0%       | 3%       | 0%       | 0       | 0%  |
| France-Alpes                   | 3%       | 37%      | 3%       | 0       | 3%  |
| France-AlpesFrançaises         | 3%       | 37%      | 3%       | 0       | 3%  |
| France-Armorique               | 0%       | 3%       | 0%       | 0       | 0%  |
| France-Gard                    | 0%       | 38%      | 0%       | 0       | 0%  |
| France-MassifCentral           | 1%       | 16%      | 0%       | 0       | 0%  |
| France-MassifCentral-MNC       | 2%       | 23%      | 1%       | 0       | 1%  |
| France-Pontgibaud              | 0%       | 39%      | 0%       | 0       | 0%  |
| France-Pyrénées                | 1%       | 28%      | 1%       | 0       | 1%  |
| France-Vosges                  | 0%       | 2%       | 3%       | 0       | 0%  |
| Germany-Eifel                  | 0%       | 4%       | 0%       | 0       | 0%  |
| Germany-Harz                   | 1%       | 14%      | 0%       | 0       | 0%  |
| Germany-Hunsrück               | 0%       | 4%       | 0%       | 0       | 0%  |
| Germany-Schwarzwald            | 7%       | 18%      | 3%       | 0       | 3%  |
| Germany-Siegerland             | 0%       | 0%       | 0%       | 0       | 0%  |
| Greece-Antiparos               | 0%       | 0%       | 0%       | 0       | 0%  |
| Greece-Chalkidiki              | 0%       | 47%      | 8%       | 0       | 0%  |
| Greece-Kea                     | 0%       | 13%      | 0%       | 0       | 0%  |
| Greece-Laurion                 | 0%       | 30%      | 8%       | 0       | 0%  |
| Greece-Seriphos                | 0%       | 9%       | 0%       | 0       | 0%  |
| Greece-Siphnos                 | 0%       | 13%      | 1%       | 0       | 0%  |
| Greece-Syros                   | 0%       | 24%      | 0%       | 0       | 0%  |
| Greece-Thasos                  | 0%       | 40%      | 4%       | 0       | 0%  |
| Greece-Thera                   | 0%       | 21%      | 1%       | 0       | 0%  |
| Iran-Centrallran               | 3%       | 6%       | 0%       | 0       | 0%  |
| Italy-Sardinia                 | 0%       | 21%      | 0%       | 0       | 0%  |
| Italy-Sardinia-Iglesiente      | 0%       | 29%      | 0%       | 0       | 0%  |
| Italy-Tuscany-MassaMarittima   | 0%       | 0%       | 0%       | 0       | 0%  |
| Portugal                       | 2%       | 34%      | 1%       | 0       | 1%  |
| SaudiArabia                    | 0%       | 0%       | 0%       | 0       | 0%  |
| Spain-Almeria                  | 0%       | 30%      | 1%       | 0       | 0%  |
| Spain-Badajoz                  | 0%       | 3%       | 1%       | 0       | 0%  |
| Spain-Baleares                 | 0%       | 63%      | 9%       | 0       | 0%  |
| Spain-Ciudad Real              | 0%       | 10%      | 0%       | 0       | 0%  |
| Spain-Córdoba                  | 0%       | 1%       | 0%       | 0       | 0%  |
| Spain-Gipuzkoa                 | 9%       | 46%      | 7%       | 1       | 7%  |
| Spain-Huelva                   | 0%       | 5%       | 0%       | 0       | 0%  |
| Spain-Jaén                     | 1%       | 9%       | 1%       | 0       | 1%  |
| Spain-Murcia                   | 0%       | 16%      | 0%       | 0       | 0%  |
| Spain-Tarragona                | 0%       | 32%      | 2%       | 0       | 0%  |
| Turkey-Central                 | 0%       | 13%      | 3%       | 0       | 0%  |
| Turkey-CentralTaurusRegion     | 0%       | 6%       | 1%       | 0       | 0%  |
| Turkey-East                    | 3%       | 14%      | 2%       | 0       | 2%  |
| Turkey-West                    | 0%       | 30%      | 4%       | 0       | 0%  |



MS029

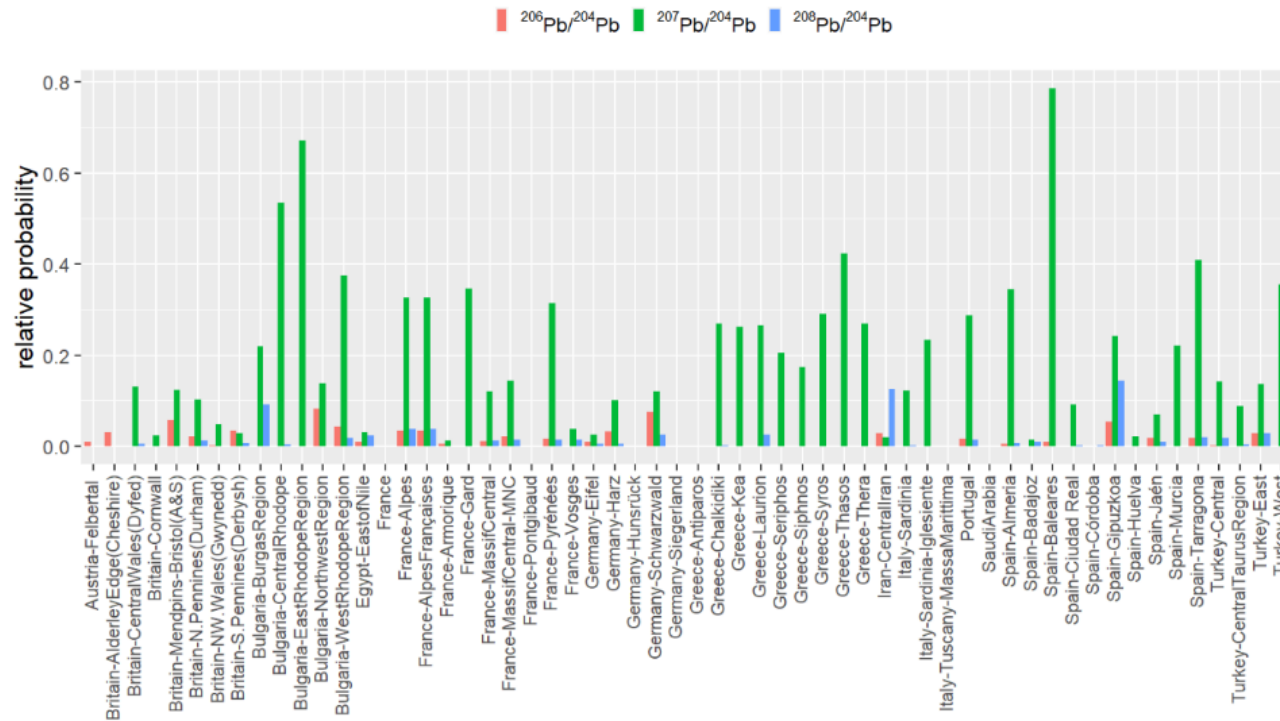

| Mining_Region                  | prob_206 | prob_207 | prob_208 | min>5%? | min |
|--------------------------------|----------|----------|----------|---------|-----|
| Austria-Felbertal              | 1%       | 0%       | 0%       | 0       | 0%  |
| Britain-AlderleyEdge(Cheshire) | 3%       | 0%       | 0%       | 0       | 0%  |
| Britain-CentralWales(Dyfed)    | 0%       | 13%      | 1%       | 0       | 0%  |
| Britain-Cornwall               | 0%       | 2%       | 0%       | 0       | 0%  |
| Britain-Mendpms-Bristol(A&S)   | 6%       | 12%      | 0%       | 0       | 0%  |
| Britain-N.Pennines(Durham)     | 2%       | 10%      | 1%       | 0       | 1%  |
| Britain-NW.Wales(Gwynedd)      | 0%       | 5%       | 0%       | 0       | 0%  |
| Britain-S.Pennines(Derbysh)    | 3%       | 3%       | 1%       | 0       | 1%  |
| Bulgaria-BurgasRegion          | 0%       | 22%      | 9%       | 0       | 0%  |
| Bulgaria-CentralRhodope        | 0%       | 53%      | 0%       | 0       | 0%  |
| Bulgaria-EastRhodopeRegion     | 0%       | 67%      | 0%       | 0       | 0%  |
| Bulgaria-NorthwestRegion       | 8%       | 14%      | 0%       | 0       | 0%  |
| Bulgaria-WestRhodopeRegion     | 4%       | 37%      | 2%       | 0       | 2%  |
| Egypt-EastofNile               | 1%       | 3%       | 2%       | 0       | 1%  |
| France                         | 0%       | 0%       | 0%       | 0       | 0%  |
| France-Alpes                   | 3%       | 33%      | 4%       | 0       | 3%  |
| France-AlpesFrançaises         | 3%       | 33%      | 4%       | 0       | 3%  |
| France-Armorique               | 0%       | 1%       | 0%       | 0       | 0%  |
| France-Gard                    | 0%       | 35%      | 0%       | 0       | 0%  |
| France-MassifCentral           | 1%       | 12%      | 1%       | 0       | 1%  |
| France-MassifCentral-MNC       | 2%       | 14%      | 2%       | 0       | 2%  |
| France-Pontgibaud              | 0%       | 0%       | 0%       | 0       | 0%  |
| France-Pyrénées                | 2%       | 31%      | 1%       | 0       | 1%  |
| France-Vosges                  | 0%       | 4%       | 1%       | 0       | 0%  |
| Germany-Eifel                  | 1%       | 3%       | 1%       | 0       | 1%  |
| Germany-Harz                   | 3%       | 10%      | 1%       | 0       | 1%  |
| Germany-Hunsrück               | 0%       | 0%       | 0%       | 0       | 0%  |
| Germany-Schwarzwald            | 8%       | 12%      | 2%       | 0       | 2%  |
| Germany-Siegerland             | 0%       | 0%       | 0%       | 0       | 0%  |
| Greece-Antiparos               | 0%       | 0%       | 0%       | 0       | 0%  |
| Greece-Chalkidiki              | 0%       | 27%      | 0%       | 0       | 0%  |
| Greece-Kea                     | 0%       | 26%      | 0%       | 0       | 0%  |
| Greece-Laurion                 | 0%       | 27%      | 3%       | 0       | 0%  |
| Greece-Seriphos                | 0%       | 20%      | 0%       | 0       | 0%  |
| Greece-Siphnos                 | 0%       | 17%      | 0%       | 0       | 0%  |
| Greece-Syros                   | 0%       | 29%      | 0%       | 0       | 0%  |
| Greece-Thasos                  | 0%       | 42%      | 0%       | 0       | 0%  |
| Greece-Thera                   | 0%       | 27%      | 0%       | 0       | 0%  |
| Iran-CentrallIran              | 3%       | 2%       | 13%      | 0       | 2%  |
| Italy-Sardinia                 | 0%       | 12%      | 0%       | 0       | 0%  |
| Italy-Sardinia-Iglesiente      | 0%       | 23%      | 0%       | 0       | 0%  |
| Italy-Tuscany-MassaMarittima   | 0%       | 0%       | 0%       | 0       | 0%  |
| Portugal                       | 2%       | 29%      | 1%       | 0       | 1%  |
| SaudiArabia                    | 0%       | 0%       | 0%       | 0       | 0%  |
| Spain-Almeria                  | 1%       | 35%      | 1%       | 0       | 1%  |
| Spain-Badajoz                  | 0%       | 1%       | 1%       | 0       | 0%  |
| Spain-Baleares                 | 1%       | 79%      | 0%       | 0       | 0%  |
| Spain-Ciudad Real              | 0%       | 9%       | 0%       | 0       | 0%  |
| Spain-Córdoba                  | 0%       | 0%       | 0%       | 0       | 0%  |
| Spain-Gipuzkoa                 | 5%       | 24%      | 14%      | 1       | 5%  |
| Spain-Huelva                   | 0%       | 2%       | 0%       | 0       | 0%  |
| Spain-Jaén                     | 2%       | 7%       | 1%       | 0       | 1%  |
| Spain-Murcia                   | 0%       | 22%      | 0%       | 0       | 0%  |
| Spain-Tarragona                | 2%       | 41%      | 2%       | 0       | 2%  |
| Turkey-Central                 | 0%       | 14%      | 2%       | 0       | 0%  |
| Turkey-CentralTaurusRegion     | 0%       | 9%       | 0%       | 0       | 0%  |
| Turkey-East                    | 3%       | 14%      | 3%       | 0       | 3%  |
| Turkey-West                    | 0%       | 35%      | 1%       | 0       | 0%  |

Lower probability

24-Quinarius-44-6

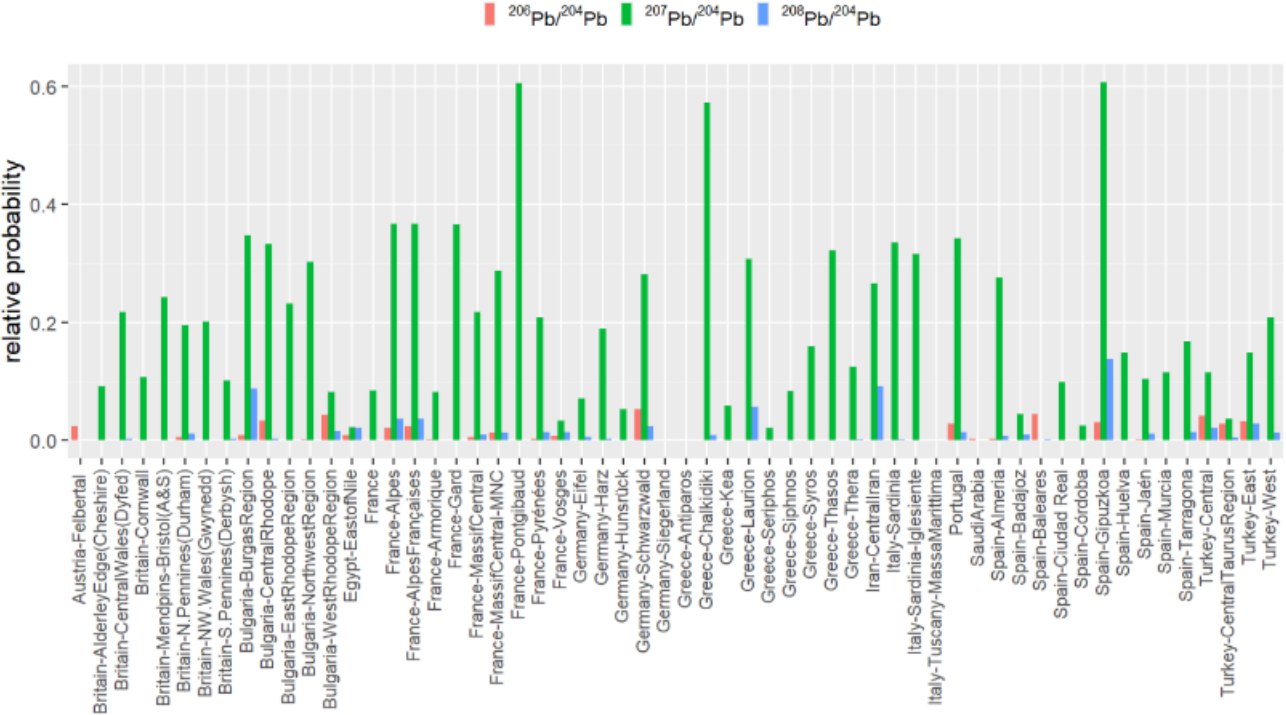

| Mining_Region                  | prob_206 | prob_207 | prob_208 | min>5%? | min |
|--------------------------------|----------|----------|----------|---------|-----|
| Austria-Felbertal              | 2%       | 0%       | 0%       | 0       | 0%  |
| Britain-AlderleyEdge(Cheshire) | 0%       | 9%       | 0%       | 0       | 0%  |
| Britain-CentralWales(Dyfed)    | 0%       | 22%      | 0%       | 0       | 0%  |
| Britain-Cornwall               | 0%       | 11%      | 0%       | 0       | 0%  |
| Britain-Mendpines-Bristol(A&S) | 0%       | 24%      | 0%       | 0       | 0%  |
| Britain-N.Pennines(Durham)     | 1%       | 20%      | 1%       | 0       | 1%  |
| Britain-NW.Wales(Gwynedd)      | 0%       | 20%      | 0%       | 0       | 0%  |
| Britain-S.Pennines(Derbysh)    | 0%       | 10%      | 0%       | 0       | 0%  |
| Bulgaria-BurgasRegion          | 1%       | 35%      | 9%       | 0       | 1%  |
| Bulgaria-CentralRhodope        | 3%       | 33%      | 0%       | 0       | 0%  |
| Bulgaria-EastRhodopeRegion     | 0%       | 23%      | 0%       | 0       | 0%  |
| Bulgaria-NorthwestRegion       | 0%       | 30%      | 0%       | 0       | 0%  |
| Bulgaria-WestRhodopeRegion     | 4%       | 8%       | 2%       | 0       | 2%  |
| Egypt-EastofNile               | 1%       | 2%       | 2%       | 0       | 1%  |
| France                         | 0%       | 9%       | 0%       | 0       | 0%  |
| France-Alpes                   | 2%       | 37%      | 4%       | 0       | 2%  |
| France-AlpesFrançaises         | 2%       | 37%      | 4%       | 0       | 2%  |
| France-Armorique               | 0%       | 8%       | 0%       | 0       | 0%  |
| France-Gard                    | 0%       | 37%      | 0%       | 0       | 0%  |
| France-MassifCentral           | 1%       | 22%      | 1%       | 0       | 1%  |
| France-MassifCentral-MNC       | 1%       | 29%      | 1%       | 0       | 1%  |
| France-Pontgibaud              | 0%       | 61%      | 0%       | 0       | 0%  |
| France-Pyrénées                | 0%       | 21%      | 1%       | 0       | 0%  |
| France-Vosges                  | 1%       | 3%       | 1%       | 0       | 1%  |
| Germany-Eifel                  | 0%       | 7%       | 1%       | 0       | 0%  |
| Germany-Harz                   | 0%       | 19%      | 0%       | 0       | 0%  |
| Germany-Hunsrück               | 0%       | 5%       | 0%       | 0       | 0%  |
| Germany-Schwarzwald            | 5%       | 28%      | 2%       | 0       | 2%  |
| Germany-Siegerland             | 0%       | 0%       | 0%       | 0       | 0%  |
| Greece-Antiparos               | 0%       | 0%       | 0%       | 0       | 0%  |
| Greece-Chalkidiki              | 0%       | 57%      | 1%       | 0       | 0%  |
| Greece-Kea                     | 0%       | 6%       | 0%       | 0       | 0%  |
| Greece-Laurion                 | 0%       | 31%      | 6%       | 0       | 0%  |
| Greece-Seriphos                | 0%       | 2%       | 0%       | 0       | 0%  |
| Greece-Siphnos                 | 0%       | 8%       | 0%       | 0       | 0%  |
| Greece-Syros                   | 0%       | 16%      | 0%       | 0       | 0%  |
| Greece-Thasos                  | 0%       | 32%      | 0%       | 0       | 0%  |
| Greece-Thera                   | 0%       | 12%      | 0%       | 0       | 0%  |
| Iran-CentralIran               | 0%       | 27%      | 9%       | 0       | 0%  |
| Italy-Sardinia-Iglesiente      | 0%       | 34%      | 0%       | 0       | 0%  |
| Italy-Tuscany-MassaMarittima   | 0%       | 0%       | 0%       | 0       | 0%  |
| Portugal                       | 3%       | 34%      | 1%       | 0       | 1%  |
| SaudiArabia                    | 0%       | 0%       | 0%       | 0       | 0%  |
| Spain-Almeria                  | 0%       | 28%      | 1%       | 0       | 0%  |
| Spain-Badajoz                  | 0%       | 4%       | 1%       | 0       | 0%  |
| Spain-Baleares                 | 4%       | 0%       | 0%       | 0       | 0%  |
| Spain-Ciudad Real              | 0%       | 10%      | 0%       | 0       | 0%  |
| Spain-Córdoba                  | 0%       | 3%       | 0%       | 0       | 0%  |
| Spain-Gipuzkoa                 | 3%       | 61%      | 14%      | 0       | 3%  |
| Spain-Huelva                   | 0%       | 15%      | 0%       | 0       | 0%  |
| Spain-Jaén                     | 0%       | 10%      | 1%       | 0       | 0%  |
| Spain-Murcia                   | 0%       | 11%      | 0%       | 0       | 0%  |
| Spain-Tarragona                | 0%       | 17%      | 1%       | 0       | 0%  |
| Turkey-Central                 | 4%       | 12%      | 2%       | 0       | 2%  |
| Turkey-CentralTaurusRegion     | 3%       | 4%       | 0%       | 0       | 0%  |
| Turkey-East                    | 3%       | 15%      | 3%       | 0       | 3%  |
| Turkey-West                    | 0%       | 21%      | 1%       | 0       | 0%  |

MS013

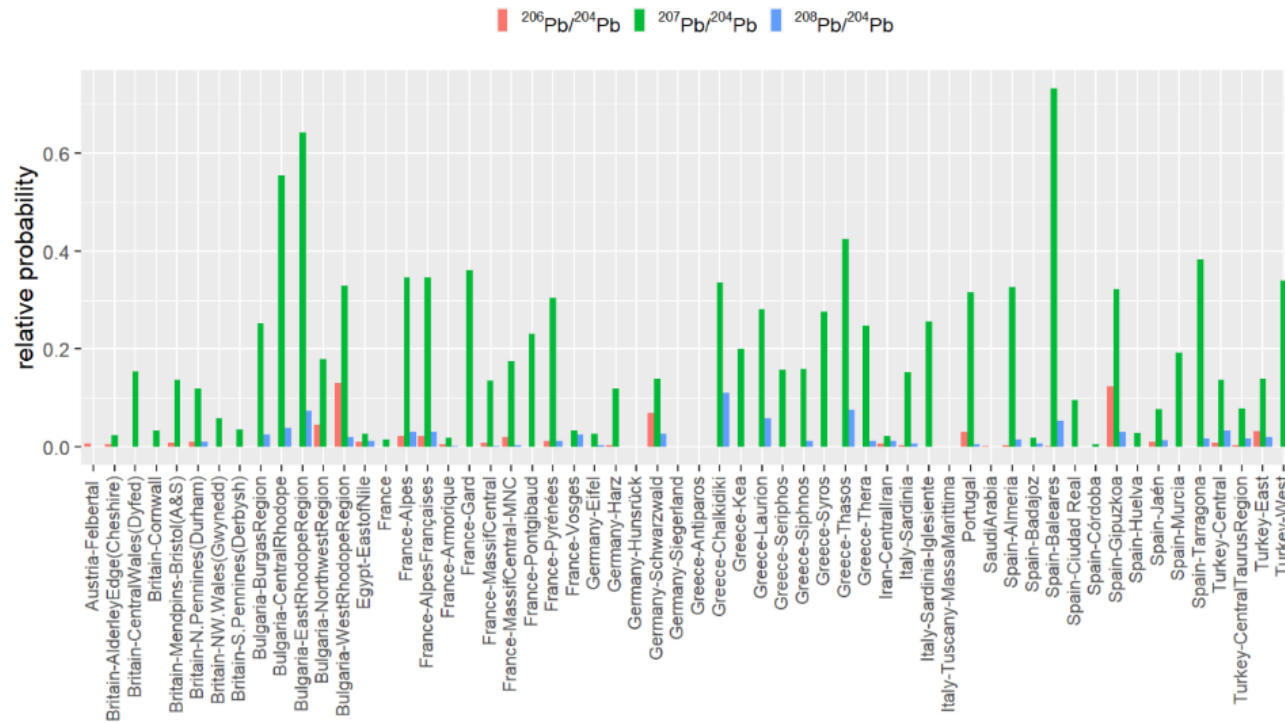

| Mining_Region                  | prob_206 | prob_207 | prob_208 | min>5%? | min |
|--------------------------------|----------|----------|----------|---------|-----|
| Austria-Felbertal              | 1%       | 0%       | 0%       | 0       | 0%  |
| Britain-AlderleyEdge(Cheshire) | 0%       | 2%       | 0%       | 0       | 0%  |
| Britain-CentralWales(Dyfed)    | 0%       | 15%      | 0%       | 0       | 0%  |
| Britain-Cornwall               | 0%       | 3%       | 0%       | 0       | 0%  |
| Britain-Mendips-Bristol(A&S)   | 1%       | 14%      | 0%       | 0       | 0%  |
| Britain-N.Pennines(Durham)     | 1%       | 12%      | 1%       | 0       | 1%  |
| Britain-NW.Wales(Gwynedd)      | 0%       | 6%       | 0%       | 0       | 0%  |
| Britain-S.Pennines(Derbysh)    | 0%       | 3%       | 0%       | 0       | 0%  |
| Bulgaria-BurgasRegion          | 0%       | 25%      | 3%       | 0       | 0%  |
| Bulgaria-CentralRhodope        | 0%       | 56%      | 4%       | 0       | 0%  |
| Bulgaria-EastRhodopeRegion     | 0%       | 64%      | 7%       | 0       | 0%  |
| Bulgaria-NorthwestRegion       | 5%       | 18%      | 0%       | 0       | 0%  |
| Bulgaria-WestRhodopeRegion     | 13%      | 33%      | 2%       | 0       | 2%  |
| Egypt-EastofNile               | 1%       | 3%       | 1%       | 0       | 1%  |
| France                         | 0%       | 2%       | 0%       | 0       | 0%  |
| France-Alpes                   | 2%       | 35%      | 3%       | 0       | 2%  |
| France-AlpesFrançaises         | 2%       | 35%      | 3%       | 0       | 2%  |
| France-Armorique               | 0%       | 2%       | 0%       | 0       | 0%  |
| France-Gard                    | 0%       | 36%      | 0%       | 0       | 0%  |
| France-MassifCentral           | 1%       | 14%      | 0%       | 0       | 0%  |
| France-MassifCentral-MNC       | 2%       | 18%      | 0%       | 0       | 0%  |
| France-Pontgibaud              | 0%       | 23%      | 0%       | 0       | 0%  |
| France-Pyrénées                | 1%       | 30%      | 1%       | 0       | 1%  |
| France-Vosges                  | 0%       | 3%       | 3%       | 0       | 0%  |
| Germany-Eifel                  | 0%       | 3%       | 0%       | 0       | 0%  |
| Germany-Harz                   | 0%       | 12%      | 0%       | 0       | 0%  |
| Germany-Hunsrück               | 0%       | 0%       | 0%       | 0       | 0%  |
| Germany-Schwarzwald            | 7%       | 14%      | 3%       | 0       | 3%  |
| Germany-Siegerland             | 0%       | 0%       | 0%       | 0       | 0%  |
| Greece-Antiparos               | 0%       | 0%       | 0%       | 0       | 0%  |
| Greece-Chalkidiki              | 0%       | 34%      | 11%      | 0       | 0%  |
| Greece-Kea                     | 0%       | 20%      | 0%       | 0       | 0%  |
| Greece-Laurion                 | 0%       | 28%      | 6%       | 0       | 0%  |
| Greece-Seriphos                | 0%       | 16%      | 0%       | 0       | 0%  |
| Greece-Siphos                  | 0%       | 16%      | 1%       | 0       | 0%  |
| Greece-Syros                   | 0%       | 28%      | 0%       | 0       | 0%  |
| Greece-Thasos                  | 0%       | 43%      | 8%       | 0       | 0%  |
| Greece-Thera                   | 0%       | 25%      | 1%       | 0       | 0%  |
| Iran-CentralIran               | 1%       | 2%       | 1%       | 0       | 1%  |
| Italy-Sardinia                 | 0%       | 15%      | 1%       | 0       | 0%  |
| Italy-Sardinia-Iglesiente      | 0%       | 26%      | 0%       | 0       | 0%  |
| Italy-Tuscany-MassaMarittima   | 0%       | 0%       | 0%       | 0       | 0%  |
| Portugal                       | 3%       | 32%      | 1%       | 0       | 1%  |
| SaudiArabia                    | 0%       | 0%       | 0%       | 0       | 0%  |
| Spain-Almeria                  | 0%       | 33%      | 2%       | 0       | 0%  |
| Spain-Badajoz                  | 0%       | 2%       | 1%       | 0       | 0%  |
| Spain-Baleares                 | 0%       | 73%      | 5%       | 0       | 0%  |
| Spain-Ciudad Real              | 0%       | 10%      | 0%       | 0       | 0%  |
| Spain-Córdoba                  | 0%       | 0%       | 0%       | 0       | 0%  |
| Spain-Gipuzkoa                 | 12%      | 32%      | 3%       | 0       | 3%  |
| Spain-Huelva                   | 0%       | 3%       | 0%       | 0       | 0%  |
| Spain-Jaén                     | 1%       | 8%       | 1%       | 0       | 1%  |
| Spain-Murcia                   | 0%       | 19%      | 0%       | 0       | 0%  |
| Spain-Tarragona                | 0%       | 38%      | 2%       | 0       | 0%  |
| Turkey-Central                 | 1%       | 14%      | 3%       | 0       | 1%  |
| Turkey-CentralTaurusRegion     | 0%       | 8%       | 2%       | 0       | 0%  |
| Turkey-East                    | 3%       | 14%      | 2%       | 0       | 2%  |
| Turkey-West                    | 0%       | 34%      | 5%       | 0       | 0%  |

MS016

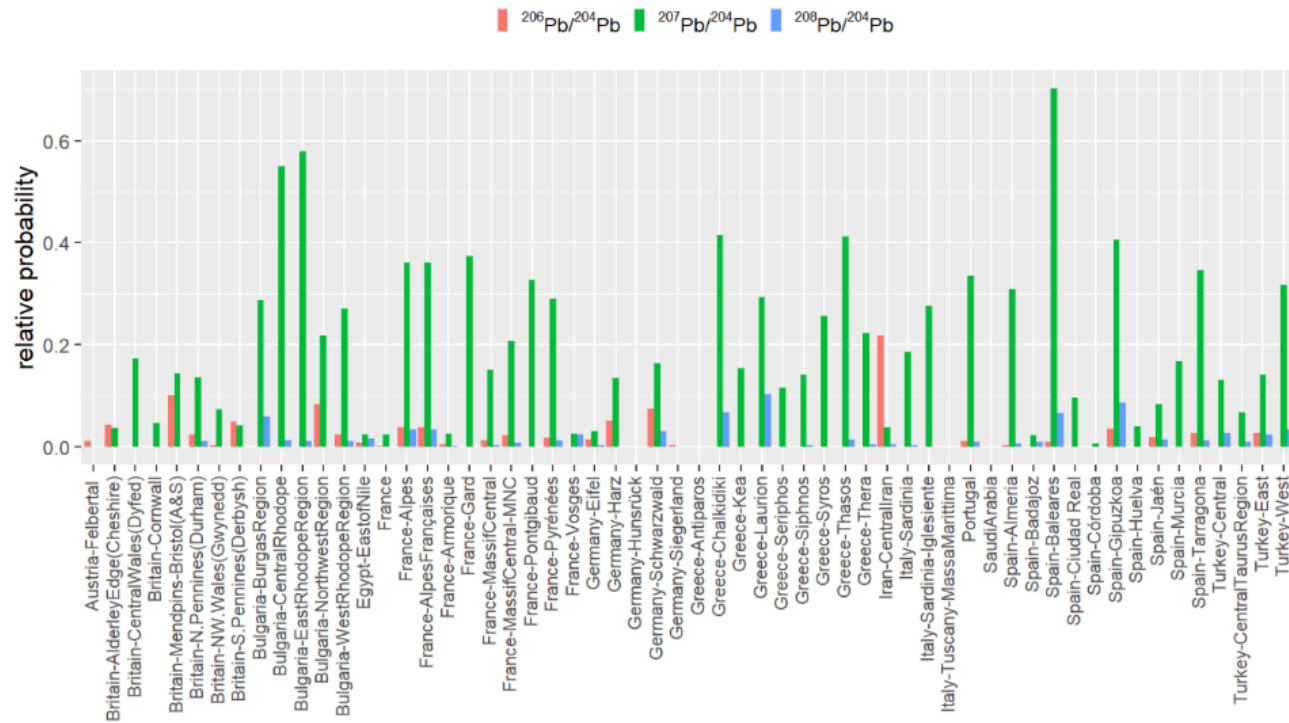

| Mining_Region                  | prob_206 | prob_207 | prob_208 | min>5%? | min |
|--------------------------------|----------|----------|----------|---------|-----|
| Austria-Felbertal              | 1%       | 0%       | 0%       | 0       | 0%  |
| Britain-AlderleyEdge(Cheshire) | 4%       | 4%       | 0%       | 0       | 0%  |
| Britain-CentralWales(Dyfed)    | 0%       | 17%      | 0%       | 0       | 0%  |
| Britain-Cornwall               | 0%       | 5%       | 0%       | 0       | 0%  |
| Britain-Mendips-Bristol(A&S)   | 10%      | 14%      | 0%       | 0       | 0%  |
| Britain-N.Pennines(Durham)     | 2%       | 14%      | 1%       | 0       | 1%  |
| Britain-NW.Wales(Gwynedd)      | 0%       | 7%       | 0%       | 0       | 0%  |
| Britain-S.Pennines(Derbysh)    | 5%       | 4%       | 0%       | 0       | 0%  |
| Bulgaria-BurgasRegion          | 0%       | 29%      | 6%       | 0       | 0%  |
| Bulgaria-CentralRhodope        | 0%       | 55%      | 1%       | 0       | 0%  |
| Bulgaria-EastRhodopeRegion     | 0%       | 58%      | 1%       | 0       | 0%  |
| Bulgaria-NorthwestRegion       | 8%       | 22%      | 0%       | 0       | 0%  |
| Bulgaria-WestRhodopeRegion     | 2%       | 27%      | 1%       | 0       | 1%  |
| Egypt-EastofNile               | 1%       | 2%       | 2%       | 0       | 1%  |
| France                         | 0%       | 2%       | 0%       | 0       | 0%  |
| France-Alpes                   | 4%       | 36%      | 3%       | 0       | 3%  |
| France-AlpesFrançaises         | 4%       | 36%      | 3%       | 0       | 3%  |
| France-Armorique               | 0%       | 3%       | 0%       | 0       | 0%  |
| France-Gard                    | 0%       | 37%      | 0%       | 0       | 0%  |
| France-MassifCentral           | 1%       | 15%      | 0%       | 0       | 0%  |
| France-MassifCentral-MNC       | 2%       | 21%      | 1%       | 0       | 1%  |
| France-Pontgibaud              | 0%       | 33%      | 0%       | 0       | 0%  |
| France-Pyrénées                | 2%       | 29%      | 1%       | 0       | 1%  |
| France-Vosges                  | 0%       | 3%       | 2%       | 0       | 0%  |
| Germany-Eifel                  | 1%       | 3%       | 0%       | 0       | 0%  |
| Germany-Harz                   | 5%       | 13%      | 0%       | 0       | 0%  |
| Germany-Hunsrück               | 0%       | 0%       | 0%       | 0       | 0%  |
| Germany-Schwarzwald            | 7%       | 16%      | 3%       | 0       | 3%  |
| Germany-Siegerland             | 0%       | 0%       | 0%       | 0       | 0%  |
| Greece-Antiparos               | 0%       | 0%       | 0%       | 0       | 0%  |
| Greece-Chalkidiki              | 0%       | 41%      | 7%       | 0       | 0%  |
| Greece-Kea                     | 0%       | 15%      | 0%       | 0       | 0%  |
| Greece-Laurion                 | 0%       | 29%      | 10%      | 0       | 0%  |
| Greece-Seriphos                | 0%       | 12%      | 0%       | 0       | 0%  |
| Greece-Siphnos                 | 0%       | 14%      | 0%       | 0       | 0%  |
| Greece-Syros                   | 0%       | 26%      | 0%       | 0       | 0%  |
| Greece-Thasos                  | 0%       | 41%      | 1%       | 0       | 0%  |
| Greece-Thera                   | 0%       | 22%      | 0%       | 0       | 0%  |
| Iran-CentrallIran              | 22%      | 4%       | 0%       | 0       | 0%  |
| Italy-Sardinia                 | 0%       | 19%      | 0%       | 0       | 0%  |
| Italy-Sardinia-Iglesiente      | 0%       | 28%      | 0%       | 0       | 0%  |
| Italy-Tuscany-MassaMarittima   | 0%       | 0%       | 0%       | 0       | 0%  |
| Portugal                       | 1%       | 34%      | 1%       | 0       | 1%  |
| SaudiArabia                    | 0%       | 0%       | 0%       | 0       | 0%  |
| Spain-Almeria                  | 0%       | 31%      | 1%       | 0       | 0%  |
| Spain-Badajoz                  | 0%       | 2%       | 1%       | 0       | 0%  |
| Spain-Baleares                 | 1%       | 70%      | 7%       | 0       | 1%  |
| Spain-Ciudad Real              | 0%       | 10%      | 0%       | 0       | 0%  |
| Spain-Córdoba                  | 0%       | 1%       | 0%       | 0       | 0%  |
| Spain-Gipuzkoa                 | 4%       | 41%      | 9%       | 0       | 4%  |
| Spain-Huelva                   | 0%       | 4%       | 0%       | 0       | 0%  |
| Spain-Jaén                     | 2%       | 8%       | 1%       | 0       | 1%  |
| Spain-Murcia                   | 0%       | 17%      | 0%       | 0       | 0%  |
| Spain-Tarragona                | 3%       | 35%      | 1%       | 0       | 1%  |
| Turkey-Central                 | 0%       | 13%      | 3%       | 0       | 0%  |
| Turkey-CentralTaurusRegion     | 0%       | 7%       | 1%       | 0       | 0%  |
| Turkey-East                    | 3%       | 14%      | 2%       | 0       | 2%  |
| Turkey-West                    | 0%       | 32%      | 3%       | 0       | 0%  |

MS019

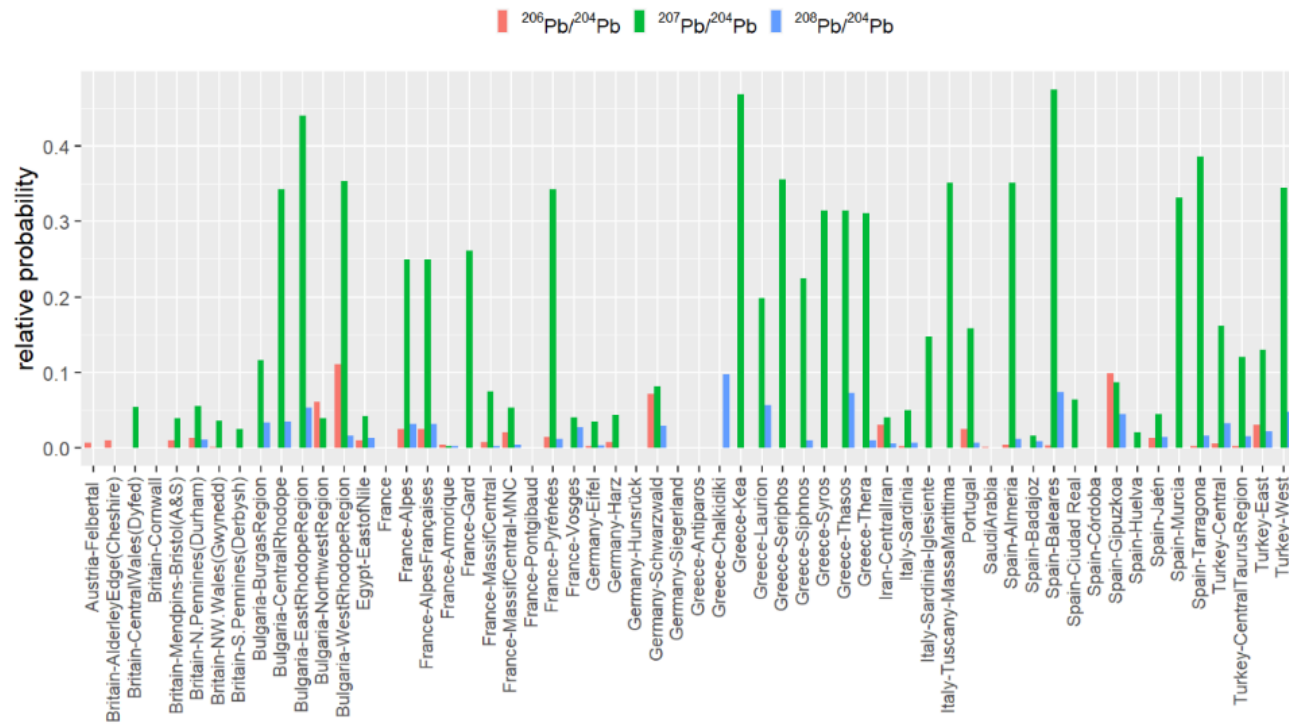

| Mining_Region                  | prob_206 | prob_207 | prob_208 | min>5%? | min |
|--------------------------------|----------|----------|----------|---------|-----|
| Austria-Felbertal              | 1%       | 0%       | 0%       | 0       | 0%  |
| Britain-AlderleyEdge(Cheshire) | 1%       | 0%       | 0%       | 0       | 0%  |
| Britain-CentralWales(Dyfed)    | 0%       | 5%       | 0%       | 0       | 0%  |
| Britain-Cornwall               | 0%       | 0%       | 0%       | 0       | 0%  |
| Britain-Mendpms-Bristol(A&S)   | 1%       | 4%       | 0%       | 0       | 0%  |
| Britain-N.Pennines(Durham)     | 1%       | 6%       | 1%       | 0       | 1%  |
| Britain-NW.Wales(Gwynedd)      | 0%       | 4%       | 0%       | 0       | 0%  |
| Britain-S.Pennines(Derbysh)    | 0%       | 2%       | 0%       | 0       | 0%  |
| Bulgaria-BurgasRegion          | 0%       | 12%      | 3%       | 0       | 0%  |
| Bulgaria-CentralRhodope        | 0%       | 34%      | 3%       | 0       | 0%  |
| Bulgaria-EastRhodopeRegion     | 0%       | 44%      | 5%       | 0       | 0%  |
| Bulgaria-NorthwestRegion       | 6%       | 4%       | 0%       | 0       | 0%  |
| Bulgaria-WestRhodopeRegion     | 11%      | 35%      | 2%       | 0       | 2%  |
| Egypt-EastofNile               | 1%       | 4%       | 1%       | 0       | 1%  |
| France                         | 0%       | 0%       | 0%       | 0       | 0%  |
| France-Alpes                   | 2%       | 25%      | 3%       | 0       | 2%  |
| France-AlpesFrançaises         | 3%       | 25%      | 3%       | 0       | 3%  |
| France-Armorique               | 0%       | 0%       | 0%       | 0       | 0%  |
| France-Gard                    | 0%       | 26%      | 0%       | 0       | 0%  |
| France-MassifCentral           | 1%       | 8%       | 0%       | 0       | 0%  |
| France-MassifCentral-MNC       | 2%       | 5%       | 0%       | 0       | 0%  |
| France-Pontgibaud              | 0%       | 0%       | 0%       | 0       | 0%  |
| France-Pyrénées                | 1%       | 34%      | 1%       | 0       | 1%  |
| France-Vosges                  | 0%       | 4%       | 3%       | 0       | 0%  |
| Germany-Eifel                  | 0%       | 3%       | 0%       | 0       | 0%  |
| Germany-Harz                   | 1%       | 4%       | 0%       | 0       | 0%  |
| Germany-Hunsrück               | 0%       | 0%       | 0%       | 0       | 0%  |
| Germany-Schwarzwald            | 7%       | 8%       | 3%       | 0       | 3%  |
| Germany-Siegerland             | 0%       | 0%       | 0%       | 0       | 0%  |
| Greece-Antiparos               | 0%       | 0%       | 0%       | 0       | 0%  |
| Greece-Chalkidiki              | 0%       | 0%       | 10%      | 0       | 0%  |
| Greece-Kea                     | 0%       | 47%      | 0%       | 0       | 0%  |
| Greece-Laurion                 | 0%       | 20%      | 6%       | 0       | 0%  |
| Greece-Seriphos                | 0%       | 36%      | 0%       | 0       | 0%  |
| Greece-Siphnos                 | 0%       | 22%      | 1%       | 0       | 0%  |
| Greece-Syros                   | 0%       | 31%      | 0%       | 0       | 0%  |
| Greece-Thasos                  | 0%       | 31%      | 7%       | 0       | 0%  |
| Greece-Thera                   | 0%       | 31%      | 1%       | 0       | 0%  |
| Iran-Centrallran               | 3%       | 4%       | 1%       | 0       | 1%  |
| Italy-Sardinia                 | 0%       | 5%       | 1%       | 0       | 0%  |
| Italy-Sardinia-Iglesiente      | 0%       | 15%      | 0%       | 0       | 0%  |
| Italy-Tuscany-MassaMarittima   | 0%       | 35%      | 0%       | 0       | 0%  |
| Portugal                       | 2%       | 16%      | 1%       | 0       | 1%  |
| SaudiArabia                    | 0%       | 0%       | 0%       | 0       | 0%  |
| Spain-Almeria                  | 0%       | 35%      | 1%       | 0       | 0%  |
| Spain-Badajoz                  | 0%       | 2%       | 1%       | 0       | 0%  |
| Spain-Baleares                 | 0%       | 47%      | 7%       | 0       | 0%  |
| Spain-Ciudad Real              | 0%       | 6%       | 0%       | 0       | 0%  |
| Spain-Córdoba                  | 0%       | 0%       | 0%       | 0       | 0%  |
| Spain-Gipuzkoa                 | 10%      | 9%       | 4%       | 0       | 4%  |
| Spain-Huelva                   | 0%       | 2%       | 0%       | 0       | 0%  |
| Spain-Jaén                     | 1%       | 4%       | 1%       | 0       | 1%  |
| Spain-Murcia                   | 0%       | 33%      | 0%       | 0       | 0%  |
| Spain-Tarragona                | 0%       | 39%      | 2%       | 0       | 0%  |
| Turkey-Central                 | 1%       | 16%      | 3%       | 0       | 1%  |
| Turkey-CentralTaurusRegion     | 0%       | 12%      | 2%       | 0       | 0%  |
| Turkey-East                    | 3%       | 13%      | 2%       | 0       | 2%  |
| Turkey-West                    | 0%       | 35%      | 5%       | 0       | 0%  |



MS024

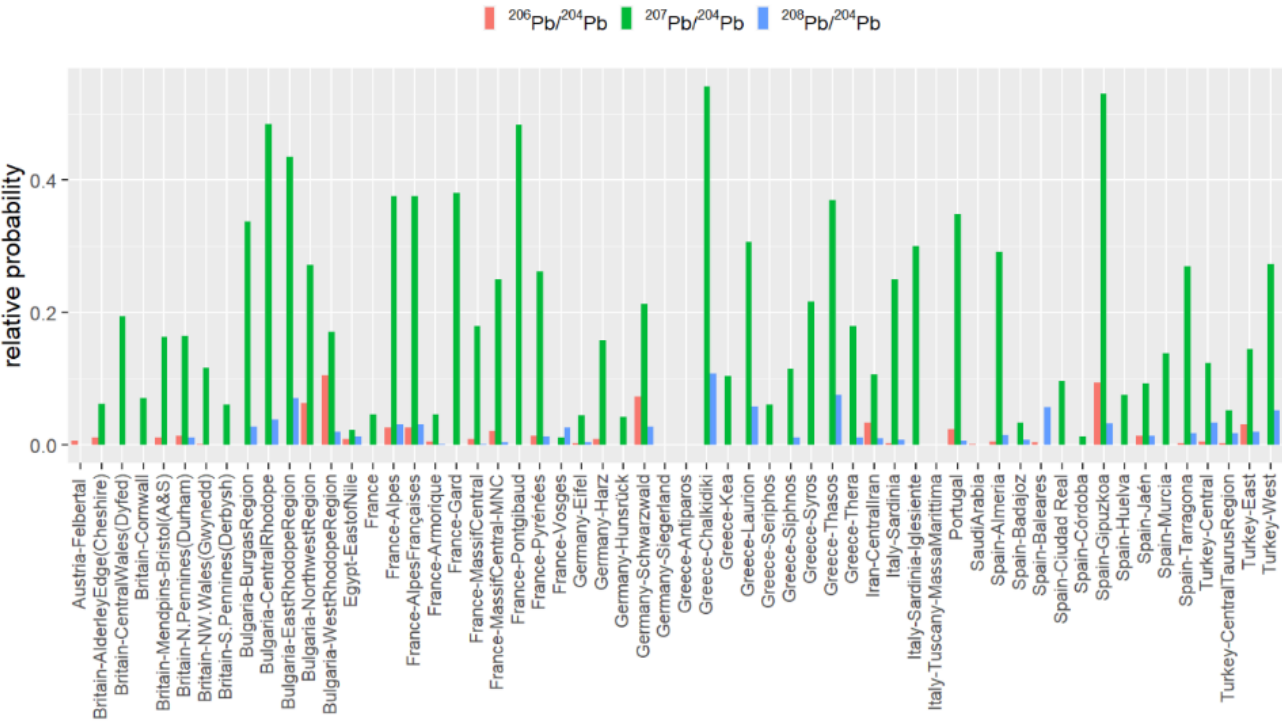

| Mining_Region                  | prob_206 | prob_207 | prob_208 | min>5%? | min |
|--------------------------------|----------|----------|----------|---------|-----|
| Austria-Felbertal              | 1%       | 0%       | 0%       | 0       | 0%  |
| Britain-AlderleyEdge(Cheshire) | 1%       | 6%       | 0%       | 0       | 0%  |
| Britain-CentralWales(Dyfed)    | 0%       | 19%      | 0%       | 0       | 0%  |
| Britain-Cornwall               | 0%       | 7%       | 0%       | 0       | 0%  |
| Britain-Mendips-Bristol(A&S)   | 1%       | 16%      | 0%       | 0       | 0%  |
| Britain-N.Pennines(Durham)     | 1%       | 16%      | 1%       | 0       | 1%  |
| Britain-NW.Wales(Gwynedd)      | 0%       | 12%      | 0%       | 0       | 0%  |
| Britain-S.Pennines(Derbysh)    | 0%       | 6%       | 0%       | 0       | 0%  |
| Bulgaria-BurgasRegion          | 0%       | 34%      | 3%       | 0       | 0%  |
| Bulgaria-CentralRhodope        | 0%       | 48%      | 4%       | 0       | 0%  |
| Bulgaria-EastRhodopeRegion     | 0%       | 44%      | 7%       | 0       | 0%  |
| Bulgaria-NorthwestRegion       | 6%       | 27%      | 0%       | 0       | 0%  |
| Bulgaria-WestRhodopeRegion     | 10%      | 17%      | 2%       | 0       | 2%  |
| Egypt-EastofNile               | 1%       | 2%       | 1%       | 0       | 1%  |
| France                         | 0%       | 5%       | 0%       | 0       | 0%  |
| France-Alpes                   | 3%       | 38%      | 3%       | 0       | 3%  |
| France-AlpesFrançaises         | 3%       | 38%      | 3%       | 0       | 3%  |
| France-Armorique               | 0%       | 5%       | 0%       | 0       | 0%  |
| France-Gard                    | 0%       | 38%      | 0%       | 0       | 0%  |
| France-MassifCentral           | 1%       | 18%      | 0%       | 0       | 0%  |
| France-MassifCentral-MNC       | 2%       | 25%      | 0%       | 0       | 0%  |
| France-Pontgibaud              | 0%       | 48%      | 0%       | 0       | 0%  |
| France-Pyrénées                | 1%       | 26%      | 1%       | 0       | 1%  |
| France-Vosges                  | 0%       | 1%       | 3%       | 0       | 0%  |
| Germany-Eifel                  | 0%       | 4%       | 0%       | 0       | 0%  |
| Germany-Harz                   | 1%       | 16%      | 0%       | 0       | 0%  |
| Germany-Hunsrück               | 0%       | 4%       | 0%       | 0       | 0%  |
| Germany-Schwarzwald            | 7%       | 21%      | 3%       | 0       | 3%  |
| Germany-Siegerland             | 0%       | 0%       | 0%       | 0       | 0%  |
| Greece-Antiparos               | 0%       | 0%       | 0%       | 0       | 0%  |
| Greece-Chalkidiki              | 0%       | 54%      | 11%      | 0       | 0%  |
| Greece-Kea                     | 0%       | 10%      | 0%       | 0       | 0%  |
| Greece-Laurion                 | 0%       | 31%      | 6%       | 0       | 0%  |
| Greece-Seriphos                | 0%       | 6%       | 0%       | 0       | 0%  |
| Greece-Siphnos                 | 0%       | 11%      | 1%       | 0       | 0%  |
| Greece-Syros                   | 0%       | 22%      | 0%       | 0       | 0%  |
| Greece-Thasos                  | 0%       | 37%      | 8%       | 0       | 0%  |
| Greece-Thera                   | 0%       | 18%      | 1%       | 0       | 0%  |
| Iran-Centrallran               | 3%       | 11%      | 1%       | 0       | 1%  |
| Italy-Sardinia                 | 0%       | 25%      | 1%       | 0       | 0%  |
| Italy-Sardinia-Iglesiente      | 0%       | 30%      | 0%       | 0       | 0%  |
| Italy-Tuscany-MassaMarittima   | 0%       | 0%       | 0%       | 0       | 0%  |
| Portugal                       | 2%       | 35%      | 1%       | 0       | 1%  |
| SaudiArabia                    | 0%       | 0%       | 0%       | 0       | 0%  |
| Spain-Almeria                  | 0%       | 29%      | 1%       | 0       | 0%  |
| Spain-Badajoz                  | 0%       | 3%       | 1%       | 0       | 0%  |
| Spain-Baleares                 | 0%       | 0%       | 6%       | 0       | 0%  |
| Spain-Ciudad Real              | 0%       | 10%      | 0%       | 0       | 0%  |
| Spain-Córdoba                  | 0%       | 1%       | 0%       | 0       | 0%  |
| Spain-Gipuzkoa                 | 9%       | 53%      | 3%       | 0       | 3%  |
| Spain-Huelva                   | 0%       | 8%       | 0%       | 0       | 0%  |
| Spain-Jaén                     | 1%       | 9%       | 1%       | 0       | 1%  |
| Spain-Murcia                   | 0%       | 14%      | 0%       | 0       | 0%  |
| Spain-Tarragona                | 0%       | 27%      | 2%       | 0       | 0%  |
| Turkey-Central                 | 1%       | 12%      | 3%       | 0       | 1%  |
| Turkey-CentralTaurusRegion     | 0%       | 5%       | 2%       | 0       | 0%  |
| Turkey-East                    | 3%       | 14%      | 2%       | 0       | 2%  |
| Turkey-West                    | 0%       | 27%      | 5%       | 0       | 0%  |

MS033

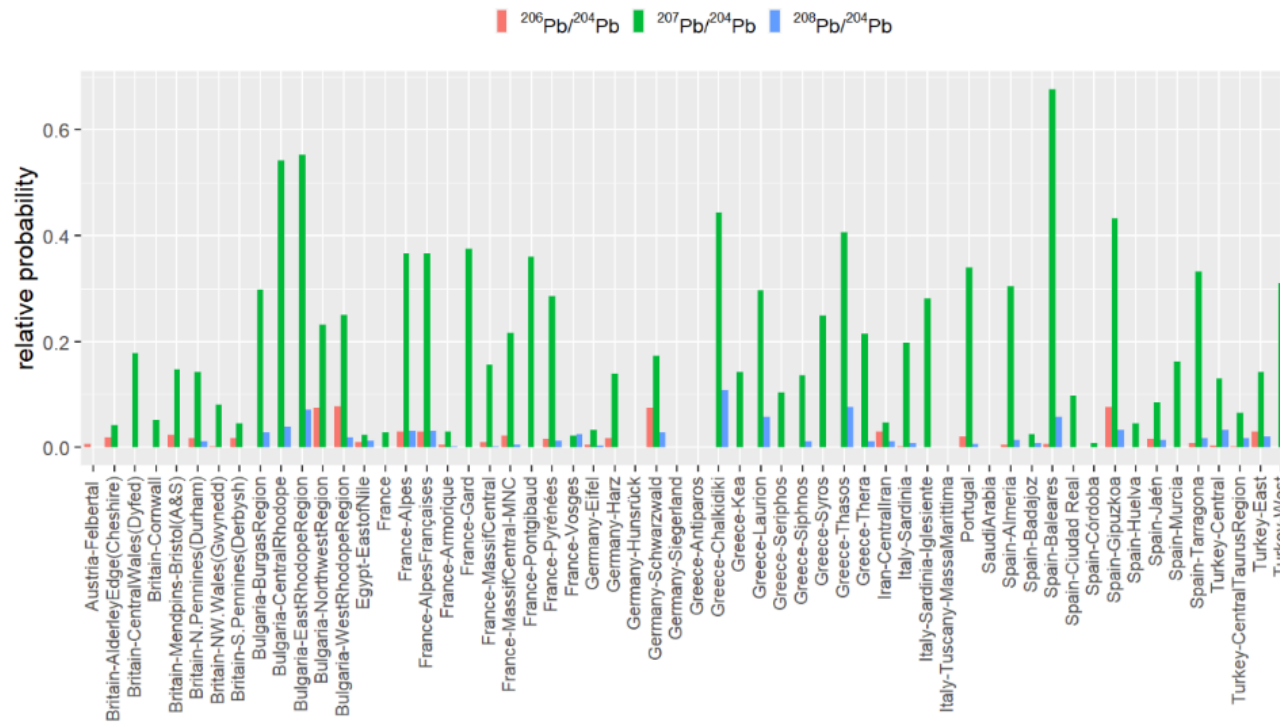

| Mining_Region                  | prob_206 | prob_207 | prob_208 | min>5%? | min |
|--------------------------------|----------|----------|----------|---------|-----|
| Austria-Felbertal              | 1%       | 0%       | 0%       | 0       | 0%  |
| Britain-AlderleyEdge(Cheshire) | 2%       | 4%       | 0%       | 0       | 0%  |
| Britain-CentralWales(Dyfed)    | 0%       | 18%      | 0%       | 0       | 0%  |
| Britain-Cornwall               | 0%       | 5%       | 0%       | 0       | 0%  |
| Britain-Mendips-Bristol(A&S)   | 2%       | 15%      | 0%       | 0       | 0%  |
| Britain-N.Pennines(Durham)     | 2%       | 14%      | 1%       | 0       | 1%  |
| Britain-NW.Wales(Gwynedd)      | 0%       | 8%       | 0%       | 0       | 0%  |
| Britain-S.Pennines(Derbysh)    | 2%       | 5%       | 0%       | 0       | 0%  |
| Bulgaria-BurgasRegion          | 0%       | 30%      | 3%       | 0       | 0%  |
| Bulgaria-CentralRhodope        | 0%       | 54%      | 4%       | 0       | 0%  |
| Bulgaria-EastRhodopeRegion     | 0%       | 55%      | 7%       | 0       | 0%  |
| Bulgaria-NorthwestRegion       | 7%       | 23%      | 0%       | 0       | 0%  |
| Bulgaria-WestRhodopeRegion     | 8%       | 25%      | 2%       | 0       | 2%  |
| Egypt-EastofNile               | 1%       | 2%       | 1%       | 0       | 1%  |
| France                         | 0%       | 3%       | 0%       | 0       | 0%  |
| France-Alpes                   | 3%       | 37%      | 3%       | 0       | 3%  |
| France-AlpesFrançaises         | 3%       | 37%      | 3%       | 0       | 3%  |
| France-Armorique               | 0%       | 3%       | 0%       | 0       | 0%  |
| France-Gard                    | 0%       | 38%      | 0%       | 0       | 0%  |
| France-MassifCentral           | 1%       | 16%      | 0%       | 0       | 0%  |
| France-MassifCentral-MNC       | 2%       | 22%      | 0%       | 0       | 0%  |
| France-Pontgibaud              | 0%       | 36%      | 0%       | 0       | 0%  |
| France-Pyrénées                | 2%       | 29%      | 1%       | 0       | 1%  |
| France-Vosges                  | 0%       | 2%       | 3%       | 0       | 0%  |
| Germany-Eifel                  | 0%       | 3%       | 0%       | 0       | 0%  |
| Germany-Harz                   | 2%       | 14%      | 0%       | 0       | 0%  |
| Germany-Hunsrück               | 0%       | 0%       | 0%       | 0       | 0%  |
| Germany-Schwarzwald            | 7%       | 17%      | 3%       | 0       | 3%  |
| Germany-Siegerland             | 0%       | 0%       | 0%       | 0       | 0%  |
| Greece-Aniparos                | 0%       | 0%       | 0%       | 0       | 0%  |
| Greece-Chalkidiki              | 0%       | 44%      | 11%      | 0       | 0%  |
| Greece-Kea                     | 0%       | 14%      | 0%       | 0       | 0%  |
| Greece-Laurion                 | 0%       | 30%      | 6%       | 0       | 0%  |
| Greece-Seriphos                | 0%       | 10%      | 0%       | 0       | 0%  |
| Greece-Siphnos                 | 0%       | 14%      | 1%       | 0       | 0%  |
| Greece-Syros                   | 0%       | 25%      | 0%       | 0       | 0%  |
| Greece-Thasos                  | 0%       | 41%      | 8%       | 0       | 0%  |
| Greece-Thera                   | 0%       | 21%      | 1%       | 0       | 0%  |
| Iran-Centrallran               | 3%       | 5%       | 1%       | 0       | 1%  |
| Italy-Sardinia                 | 0%       | 20%      | 1%       | 0       | 0%  |
| Italy-Sardinia-Iglesiente      | 0%       | 28%      | 0%       | 0       | 0%  |
| Italy-Tuscany-MassaMarittima   | 0%       | 0%       | 0%       | 0       | 0%  |
| Portugal                       | 2%       | 34%      | 1%       | 0       | 1%  |
| SaudiArabia                    | 0%       | 0%       | 0%       | 0       | 0%  |
| Spain-Almeria                  | 1%       | 30%      | 1%       | 0       | 1%  |
| Spain-Badajoz                  | 0%       | 2%       | 1%       | 0       | 0%  |
| Spain-Baleares                 | 1%       | 68%      | 6%       | 0       | 1%  |
| Spain-Ciudad Real              | 0%       | 10%      | 0%       | 0       | 0%  |
| Spain-Córdoba                  | 0%       | 1%       | 0%       | 0       | 0%  |
| Spain-Gipuzkoa                 | 8%       | 43%      | 3%       | 0       | 3%  |
| Spain-Huelva                   | 0%       | 5%       | 0%       | 0       | 0%  |
| Spain-Jaén                     | 2%       | 8%       | 1%       | 0       | 1%  |
| Spain-Murcia                   | 0%       | 16%      | 0%       | 0       | 0%  |
| Spain-Tarragona                | 1%       | 33%      | 2%       | 0       | 1%  |
| Turkey-Central                 | 0%       | 13%      | 3%       | 0       | 0%  |
| Turkey-CentralTaurusRegion     | 0%       | 6%       | 2%       | 0       | 0%  |
| Turkey-East                    | 3%       | 14%      | 2%       | 0       | 2%  |
| Turkey-West                    | 0%       | 31%      | 5%       | 0       | 0%  |

MS045

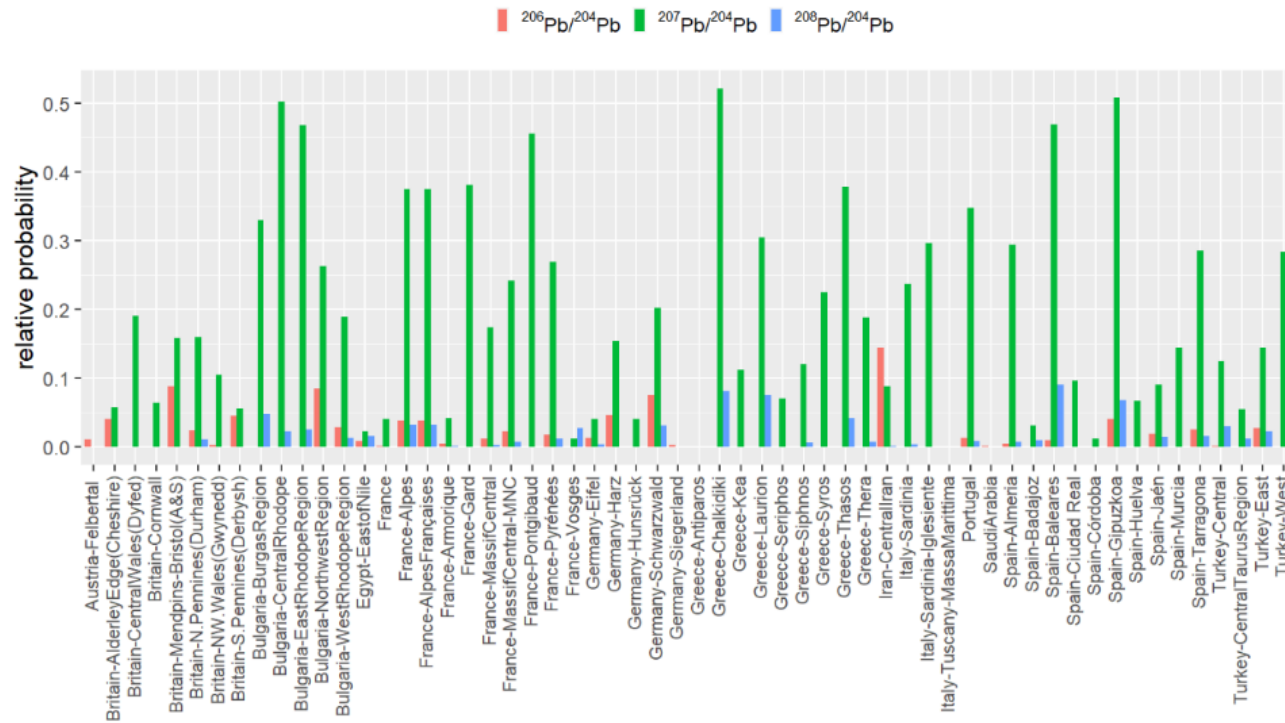

| Mining_Region                  | prob_206 | prob_207 | prob_208 | min>5%? | min |
|--------------------------------|----------|----------|----------|---------|-----|
| Austria-Felbertal              | 1%       | 0%       | 0%       | 0       | 0%  |
| Britain-AlderleyEdge(Cheshire) | 4%       | 6%       | 0%       | 0       | 0%  |
| Britain-CentralWales(Dyfed)    | 0%       | 19%      | 0%       | 0       | 0%  |
| Britain-Cornwall               | 0%       | 6%       | 0%       | 0       | 0%  |
| Britain-Mendips-Bristol(A&S)   | 9%       | 16%      | 0%       | 0       | 0%  |
| Britain-N.Pennines(Durham)     | 2%       | 16%      | 1%       | 0       | 1%  |
| Britain-NW.Wales(Gwynedd)      | 0%       | 11%      | 0%       | 0       | 0%  |
| Britain-S.Pennines(Derbysh)    | 4%       | 6%       | 0%       | 0       | 0%  |
| Bulgaria-BurgasRegion          | 0%       | 33%      | 5%       | 0       | 0%  |
| Bulgaria-CentralRhodope        | 0%       | 50%      | 2%       | 0       | 0%  |
| Bulgaria-EastRhodopeRegion     | 0%       | 47%      | 3%       | 0       | 0%  |
| Bulgaria-NorthwestRegion       | 8%       | 26%      | 0%       | 0       | 0%  |
| Bulgaria-WestRhodopeRegion     | 3%       | 19%      | 1%       | 0       | 1%  |
| Egypt-EastofNile               | 1%       | 2%       | 2%       | 0       | 1%  |
| France                         | 0%       | 4%       | 0%       | 0       | 0%  |
| France-Alpes                   | 4%       | 37%      | 3%       | 0       | 3%  |
| France-AlpesFrançaises         | 4%       | 37%      | 3%       | 0       | 3%  |
| France-Armorique               | 0%       | 4%       | 0%       | 0       | 0%  |
| France-Gard                    | 0%       | 38%      | 0%       | 0       | 0%  |
| France-MassifCentral           | 1%       | 17%      | 0%       | 0       | 0%  |
| France-MassifCentral-MNC       | 2%       | 24%      | 1%       | 0       | 1%  |
| France-Pontgibaud              | 0%       | 46%      | 0%       | 0       | 0%  |
| France-Pyrénées                | 2%       | 27%      | 1%       | 0       | 1%  |
| France-Vosges                  | 0%       | 1%       | 3%       | 0       | 0%  |
| Germany-Eifel                  | 1%       | 4%       | 0%       | 0       | 0%  |
| Germany-Harz                   | 5%       | 15%      | 0%       | 0       | 0%  |
| Germany-Hunsrück               | 0%       | 4%       | 0%       | 0       | 0%  |
| Germany-Schwarzwald            | 8%       | 20%      | 3%       | 0       | 3%  |
| Germany-Siegerland             | 0%       | 0%       | 0%       | 0       | 0%  |
| Greece-Antiparos               | 0%       | 0%       | 0%       | 0       | 0%  |
| Greece-Chalkidiki              | 0%       | 52%      | 8%       | 0       | 0%  |
| Greece-Kea                     | 0%       | 11%      | 0%       | 0       | 0%  |
| Greece-Laurion                 | 0%       | 30%      | 7%       | 0       | 0%  |
| Greece-Seriphos                | 0%       | 7%       | 0%       | 0       | 0%  |
| Greece-Siphnos                 | 0%       | 12%      | 1%       | 0       | 0%  |
| Greece-Syros                   | 0%       | 22%      | 0%       | 0       | 0%  |
| Greece-Thasos                  | 0%       | 38%      | 4%       | 0       | 0%  |
| Greece-Thera                   | 0%       | 19%      | 1%       | 0       | 0%  |
| Iran-Centrallran               | 14%      | 9%       | 0%       | 0       | 0%  |
| Italy-Sardinia-Iglesiente      | 0%       | 24%      | 0%       | 0       | 0%  |
| Italy-Sardinia-MassaMarittima  | 0%       | 30%      | 0%       | 0       | 0%  |
| Italy-Tuscany-MassaMarittima   | 0%       | 0%       | 0%       | 0       | 0%  |
| Portugal                       | 1%       | 35%      | 1%       | 0       | 1%  |
| SaudiArabia                    | 0%       | 0%       | 0%       | 0       | 0%  |
| Spain-Almeria                  | 0%       | 29%      | 1%       | 0       | 0%  |
| Spain-Badajoz                  | 0%       | 3%       | 1%       | 0       | 0%  |
| Spain-Baleares                 | 1%       | 47%      | 9%       | 0       | 1%  |
| Spain-Ciudad Real              | 0%       | 10%      | 0%       | 0       | 0%  |
| Spain-Córdoba                  | 0%       | 1%       | 0%       | 0       | 0%  |
| Spain-Gipuzkoa                 | 4%       | 51%      | 7%       | 0       | 4%  |
| Spain-Huelva                   | 0%       | 7%       | 0%       | 0       | 0%  |
| Spain-Jaén                     | 2%       | 9%       | 1%       | 0       | 1%  |
| Spain-Murcia                   | 0%       | 14%      | 0%       | 0       | 0%  |
| Spain-Tarragona                | 3%       | 29%      | 2%       | 0       | 2%  |
| Turkey-Central                 | 0%       | 13%      | 3%       | 0       | 0%  |
| Turkey-CentralTaurusRegion     | 0%       | 6%       | 1%       | 0       | 0%  |
| Turkey-East                    | 3%       | 14%      | 2%       | 0       | 2%  |
| Turkey-West                    | 0%       | 28%      | 4%       | 0       | 0%  |

Group2: Northwestern Europe

10-Denarius-53-2

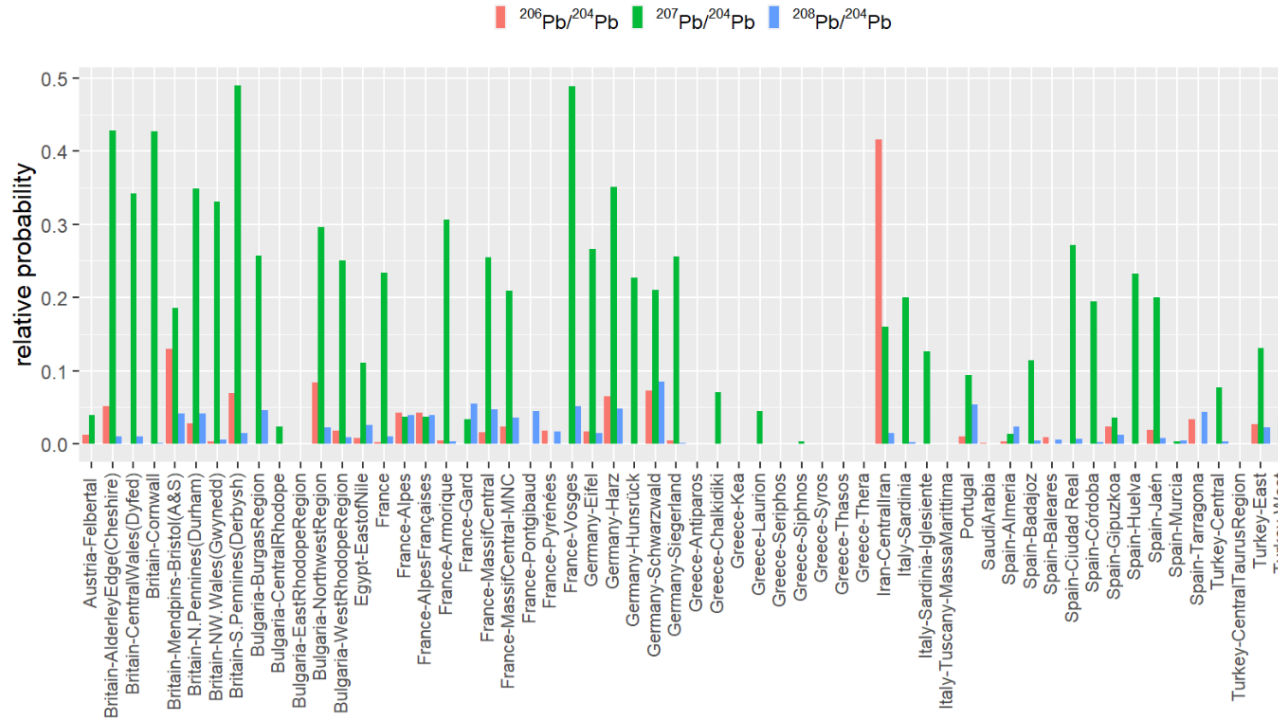

| Mining_Region                  | prob_206 | prob_207 | prob_208 | min>5%? | min |
|--------------------------------|----------|----------|----------|---------|-----|
| Austria-Felbertal              | 1%       | 4%       | 0%       | 0       | 0%  |
| Britain-AlderleyEdge(Cheshire) | 5%       | 43%      | 1%       | 0       | 1%  |
| Britain-CentralWales(Dyfed)    | 0%       | 34%      | 1%       | 0       | 0%  |
| Britain-Cornwall               | 0%       | 43%      | 0%       | 0       | 0%  |
| Britain-Mendpins-Bristol(A&S)  | 13%      | 19%      | 4%       | 0       | 4%  |
| Britain-N.Pennines(Durham)     | 3%       | 35%      | 4%       | 0       | 3%  |
| Britain-NW.Wales(Gwynedd)      | 0%       | 33%      | 1%       | 0       | 0%  |
| Britain-S.Pennines(Derbysh)    | 7%       | 49%      | 1%       | 0       | 1%  |
| Bulgaria-BurgasRegion          | 0%       | 26%      | 5%       | 0       | 0%  |
| Bulgaria-CentralRhodope        | 0%       | 2%       | 0%       | 0       | 0%  |
| Bulgaria-EastRhodopeRegion     | 0%       | 0%       | 0%       | 0       | 0%  |
| Bulgaria-NorthwestRegion       | 8%       | 30%      | 2%       | 0       | 2%  |
| Bulgaria-WestRhodopeRegion     | 2%       | 25%      | 1%       | 0       | 1%  |
| Egypt-EastofNile               | 1%       | 11%      | 3%       | 0       | 1%  |
| France                         | 0%       | 23%      | 1%       | 0       | 0%  |
| France-Alpes                   | 4%       | 4%       | 4%       | 0       | 4%  |
| France-AlpesFrançaises         | 4%       | 4%       | 4%       | 0       | 4%  |
| France-Armorique               | 1%       | 31%      | 0%       | 0       | 0%  |
| France-Gard                    | 0%       | 3%       | 6%       | 0       | 0%  |
| France-MassifCentral           | 2%       | 25%      | 5%       | 0       | 2%  |
| France-MassifCentral-MNC       | 2%       | 21%      | 4%       | 0       | 2%  |
| France-Pontgibaud              | 0%       | 0%       | 5%       | 0       | 0%  |
| France-Pyrénées                | 2%       | 0%       | 2%       | 0       | 0%  |
| France-Vosges                  | 0%       | 49%      | 5%       | 0       | 0%  |
| Germany-Eifel                  | 2%       | 27%      | 1%       | 0       | 1%  |
| Germany-Harz                   | 7%       | 35%      | 5%       | 0       | 5%  |
| Germany-Hunsrück               | 0%       | 23%      | 0%       | 0       | 0%  |
| Germany-Schwarzwald            | 7%       | 21%      | 8%       | 1       | 7%  |
| Germany-Siegerland             | 0%       | 26%      | 0%       | 0       | 0%  |
| Greece-Antiparos               | 0%       | 0%       | 0%       | 0       | 0%  |
| Greece-Chalkidiki              | 0%       | 7%       | 0%       | 0       | 0%  |
| Greece-Kea                     | 0%       | 0%       | 0%       | 0       | 0%  |
| Greece-Laurion                 | 0%       | 4%       | 0%       | 0       | 0%  |
| Greece-Seriphos                | 0%       | 0%       | 0%       | 0       | 0%  |
| Greece-Siphnos                 | 0%       | 0%       | 0%       | 0       | 0%  |
| Greece-Syros                   | 0%       | 0%       | 0%       | 0       | 0%  |
| Greece-Thasos                  | 0%       | 0%       | 0%       | 0       | 0%  |
| Greece-Thera                   | 0%       | 0%       | 0%       | 0       | 0%  |
| Iran-CentralIran               | 42%      | 16%      | 1%       | 0       | 1%  |
| Italy-Sardinia                 | 0%       | 20%      | 0%       | 0       | 0%  |
| Italy-Sardinia-Iglesiente      | 0%       | 13%      | 0%       | 0       | 0%  |
| Italy-Tuscany-MassaMarittima   | 0%       | 0%       | 0%       | 0       | 0%  |
| Portugal                       | 1%       | 9%       | 5%       | 0       | 1%  |
| SaudiArabia                    | 0%       | 0%       | 0%       | 0       | 0%  |
| Spain-Almeria                  | 0%       | 1%       | 2%       | 0       | 0%  |
| Spain-Badajoz                  | 0%       | 11%      | 0%       | 0       | 0%  |
| Spain-Baleares                 | 1%       | 0%       | 1%       | 0       | 0%  |
| Spain-Ciudad Real              | 0%       | 27%      | 1%       | 0       | 0%  |
| Spain-Córdoba                  | 0%       | 20%      | 0%       | 0       | 0%  |
| Spain-Gipuzkoa                 | 2%       | 4%       | 1%       | 0       | 1%  |
| Spain-Huelva                   | 0%       | 23%      | 0%       | 0       | 0%  |
| Spain-Jaén                     | 2%       | 20%      | 1%       | 0       | 1%  |
| Spain-Murcia                   | 0%       | 0%       | 1%       | 0       | 0%  |
| Spain-Tarragona                | 3%       | 0%       | 4%       | 0       | 0%  |
| Turkey-Central                 | 0%       | 8%       | 0%       | 0       | 0%  |
| Turkey-CentralTaurusRegion     | 0%       | 0%       | 0%       | 0       | 0%  |
| Turkey-East                    | 3%       | 13%      | 2%       | 0       | 2%  |
| Turkey-West                    | 0%       | 3%       | 0%       | 0       | 0%  |

# 19-Denarius-112-2a

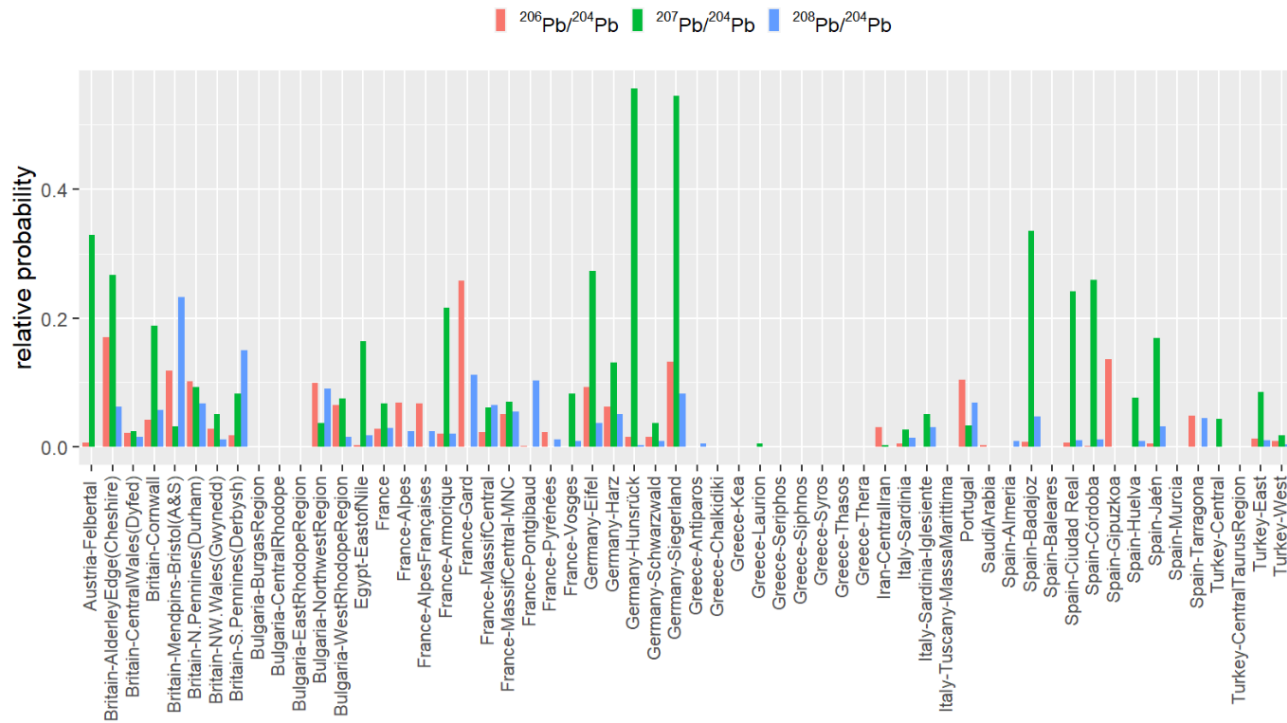

| Mining_Region                  | prob_206 | prob_207 | prob_208 | min>5%? | min |
|--------------------------------|----------|----------|----------|---------|-----|
| Austria-Felbertal              | 1%       | 33%      | 0%       | 0       | 0%  |
| Britain-AlderleyEdge(Cheshire) | 17%      | 27%      | 6%       | 1       | 5%  |
| Britain-CentralWales(Dyfed)    | 2%       | 2%       | 2%       | 0       | 2%  |
| Britain-Cornwall               | 4%       | 19%      | 6%       | 0       | 4%  |
| Britain-Mendpms-Bristol(A&S)   | 12%      | 3%       | 23%      | 0       | 3%  |
| Britain-N.Pennines(Durham)     | 10%      | 9%       | 7%       | 1       | 7%  |
| Britain-NW.Wales(Gwynedd)      | 3%       | 5%       | 1%       | 0       | 1%  |
| Britain-S.Pennines(Derbysh)    | 2%       | 8%       | 15%      | 0       | 2%  |
| Bulgaria-BurgasRegion          | 0%       | 0%       | 0%       | 0       | 0%  |
| Bulgaria-CentralRhodope        | 0%       | 0%       | 0%       | 0       | 0%  |
| Bulgaria-EastRhodopeRegion     | 0%       | 0%       | 0%       | 0       | 0%  |
| Bulgaria-NorthwestRegion       | 10%      | 4%       | 9%       | 0       | 4%  |
| Bulgaria-WestRhodopeRegion     | 7%       | 8%       | 2%       | 0       | 2%  |
| Egypt-EastofNile               | 0%       | 16%      | 2%       | 0       | 0%  |
| France                         | 3%       | 7%       | 3%       | 0       | 3%  |
| France-Alpes                   | 7%       | 0%       | 2%       | 0       | 0%  |
| France-AlpesFrançaises         | 7%       | 0%       | 2%       | 0       | 0%  |
| France-Armorique               | 2%       | 22%      | 2%       | 0       | 2%  |
| France-Gard                    | 26%      | 0%       | 11%      | 0       | 0%  |
| France-MassifCentral           | 2%       | 6%       | 7%       | 0       | 2%  |
| France-MassifCentral-MNC       | 5%       | 7%       | 5%       | 1       | 5%  |
| France-Pontgibaud              | 0%       | 0%       | 10%      | 0       | 0%  |
| France-Pyrénées                | 2%       | 0%       | 1%       | 0       | 0%  |
| France-Vosges                  | 0%       | 8%       | 1%       | 0       | 0%  |
| Germany-Eifel                  | 9%       | 27%      | 4%       | 0       | 4%  |
| Germany-Harz                   | 6%       | 13%      | 5%       | 1       | 5%  |
| Germany-Hunsrück               | 1%       | 56%      | 0%       | 0       | 0%  |
| Germany-Schwarzwald            | 2%       | 4%       | 1%       | 0       | 1%  |
| Germany-Siegerland             | 13%      | 54%      | 8%       | 1       | 8%  |
| Greece-Antiparos               | 0%       | 0%       | 1%       | 0       | 0%  |
| Greece-Chalkidiki              | 0%       | 0%       | 0%       | 0       | 0%  |
| Greece-Kea                     | 0%       | 0%       | 0%       | 0       | 0%  |
| Greece-Laurion                 | 0%       | 1%       | 0%       | 0       | 0%  |
| Greece-Seriphos                | 0%       | 0%       | 0%       | 0       | 0%  |
| Greece-Siphnos                 | 0%       | 0%       | 0%       | 0       | 0%  |
| Greece-Syros                   | 0%       | 0%       | 0%       | 0       | 0%  |
| Greece-Thasos                  | 0%       | 0%       | 0%       | 0       | 0%  |
| Greece-Thera                   | 0%       | 0%       | 0%       | 0       | 0%  |
| Iran-CentralIran               | 3%       | 0%       | 0%       | 0       | 0%  |
| Italy-Sardinia                 | 0%       | 3%       | 1%       | 0       | 0%  |
| Italy-Sardinia-Iglesiente      | 0%       | 5%       | 3%       | 0       | 0%  |
| Italy-Tuscany-MassaMarittima   | 0%       | 0%       | 0%       | 0       | 0%  |
| Portugal                       | 10%      | 3%       | 7%       | 0       | 3%  |
| SaudiArabia                    | 0%       | 0%       | 0%       | 0       | 0%  |
| Spain-Almeria                  | 0%       | 0%       | 1%       | 0       | 0%  |
| Spain-Badajoz                  | 1%       | 33%      | 5%       | 0       | 1%  |
| Spain-Baleares                 | 0%       | 0%       | 0%       | 0       | 0%  |
| Spain-Ciudad Real              | 1%       | 24%      | 1%       | 0       | 1%  |
| Spain-Córdoba                  | 0%       | 26%      | 1%       | 0       | 0%  |
| Spain-Gipuzkoa                 | 14%      | 0%       | 0%       | 0       | 0%  |
| Spain-Huelva                   | 0%       | 8%       | 1%       | 0       | 0%  |
| Spain-Jaén                     | 1%       | 17%      | 3%       | 0       | 1%  |
| Spain-Murcia                   | 0%       | 0%       | 0%       | 0       | 0%  |
| Spain-Tarragona                | 5%       | 0%       | 5%       | 0       | 0%  |
| Turkey-Central                 | 0%       | 4%       | 0%       | 0       | 0%  |
| Turkey-CentralTaurusRegion     | 0%       | 0%       | 0%       | 0       | 0%  |
| Turkey-East                    | 1%       | 9%       | 1%       | 0       | 1%  |
| Turkey-West                    | 1%       | 2%       | 0%       | 0       | 0%  |



MS042

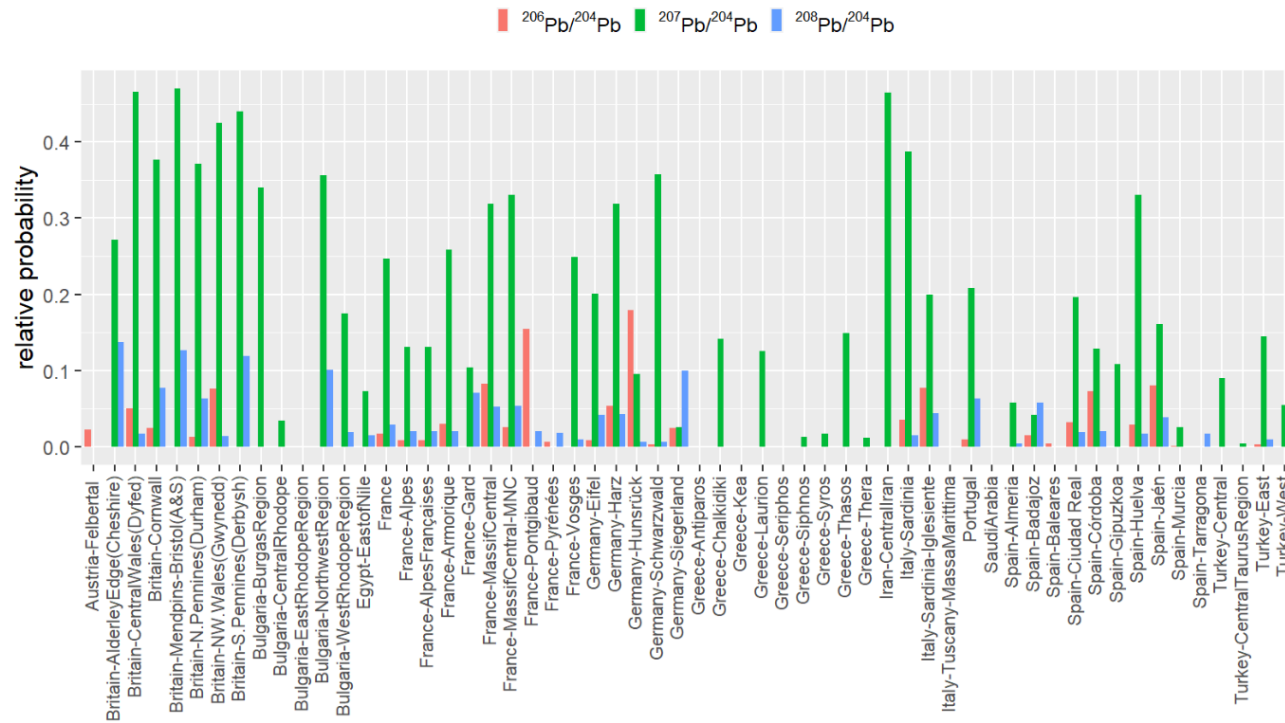

| Mining_Region                  | prob_206 | prob_207 | prob_208 | min>5%? | min |
|--------------------------------|----------|----------|----------|---------|-----|
| Austria-Felbertal              | 2%       | 0%       | 0%       | 0       | 0%  |
| Britain-AlderleyEdge(Cheshire) | 0%       | 27%      | 14%      | 0       | 0%  |
| Britain-CentralWales(Dyfed)    | 5%       | 47%      | 2%       | 0       | 2%  |
| Britain-Cornwall               | 2%       | 38%      | 8%       | 0       | 2%  |
| Britain-Mendips-Bristol(A&S)   | 0%       | 47%      | 13%      | 0       | 0%  |
| Britain-N.Pennines(Durham)     | 1%       | 37%      | 6%       | 0       | 1%  |
| Britain-NW.Wales(Gwynedd)      | 8%       | 43%      | 1%       | 0       | 1%  |
| Britain-S.Pennines(Derbysh)    | 0%       | 44%      | 12%      | 0       | 0%  |
| Bulgaria-BurgasRegion          | 0%       | 34%      | 0%       | 0       | 0%  |
| Bulgaria-CentralRhodope        | 0%       | 3%       | 0%       | 0       | 0%  |
| Bulgaria-EastRhodopeRegion     | 0%       | 0%       | 0%       | 0       | 0%  |
| Bulgaria-NorthwestRegion       | 0%       | 36%      | 10%      | 0       | 0%  |
| Bulgaria-WestRhodopeRegion     | 0%       | 18%      | 2%       | 0       | 0%  |
| Egypt-EastofNile               | 0%       | 7%       | 2%       | 0       | 0%  |
| France                         | 2%       | 25%      | 3%       | 0       | 2%  |
| France-Alpes                   | 1%       | 13%      | 2%       | 0       | 1%  |
| France-AlpesFrançaises         | 1%       | 13%      | 2%       | 0       | 1%  |
| France-Armorique               | 3%       | 26%      | 2%       | 0       | 2%  |
| France-Gard                    | 0%       | 10%      | 7%       | 0       | 0%  |
| France-MassifCentral           | 8%       | 32%      | 5%       | 1       | 5%  |
| France-MassifCentral-MNC       | 3%       | 33%      | 5%       | 0       | 3%  |
| France-Pontgibaud              | 15%      | 0%       | 2%       | 0       | 0%  |
| France-Pyrénées                | 1%       | 0%       | 2%       | 0       | 0%  |
| France-Vosges                  | 0%       | 25%      | 1%       | 0       | 0%  |
| Germany-Eifel                  | 1%       | 20%      | 4%       | 0       | 1%  |
| Germany-Harz                   | 5%       | 32%      | 4%       | 0       | 4%  |
| Germany-Hunsrück               | 18%      | 10%      | 1%       | 0       | 1%  |
| Germany-Schwarzwald            | 0%       | 36%      | 1%       | 0       | 0%  |
| Germany-Siegerland             | 2%       | 3%       | 10%      | 0       | 2%  |
| Greece-Antiparos               | 0%       | 0%       | 0%       | 0       | 0%  |
| Greece-Chalkidiki              | 0%       | 14%      | 0%       | 0       | 0%  |
| Greece-Kea                     | 0%       | 0%       | 0%       | 0       | 0%  |
| Greece-Laurion                 | 0%       | 13%      | 0%       | 0       | 0%  |
| Greece-Seriphos                | 0%       | 0%       | 0%       | 0       | 0%  |
| Greece-Siphos                  | 0%       | 1%       | 0%       | 0       | 0%  |
| Greece-Syros                   | 0%       | 2%       | 0%       | 0       | 0%  |
| Greece-Thasos                  | 0%       | 15%      | 0%       | 0       | 0%  |
| Greece-Thera                   | 0%       | 1%       | 0%       | 0       | 0%  |
| Iran-Centrallran               | 0%       | 46%      | 0%       | 0       | 0%  |
| Italy-Sardinia                 | 4%       | 39%      | 2%       | 0       | 2%  |
| Italy-Sardinia-Iglesiente      | 8%       | 20%      | 4%       | 0       | 4%  |
| Italy-Tuscany-MassaMarittima   | 0%       | 0%       | 0%       | 0       | 0%  |
| Portugal                       | 1%       | 21%      | 6%       | 0       | 1%  |
| SaudiArabia                    | 0%       | 0%       | 0%       | 0       | 0%  |
| Spain-Almeria                  | 0%       | 6%       | 0%       | 0       | 0%  |
| Spain-Badajoz                  | 2%       | 4%       | 6%       | 0       | 2%  |
| Spain-Baleares                 | 0%       | 0%       | 0%       | 0       | 0%  |
| Spain-Ciudad Real              | 3%       | 20%      | 2%       | 0       | 2%  |
| Spain-Córdoba                  | 7%       | 13%      | 2%       | 0       | 2%  |
| Spain-Gipuzkoa                 | 0%       | 11%      | 0%       | 0       | 0%  |
| Spain-Huelva                   | 3%       | 33%      | 2%       | 0       | 2%  |
| Spain-Jaén                     | 8%       | 16%      | 4%       | 0       | 4%  |
| Spain-Murcia                   | 0%       | 3%       | 0%       | 0       | 0%  |
| Spain-Tarragona                | 0%       | 0%       | 2%       | 0       | 0%  |
| Turkey-Central                 | 0%       | 9%       | 0%       | 0       | 0%  |
| Turkey-CentralTaurusRegion     | 0%       | 0%       | 0%       | 0       | 0%  |
| Turkey-East                    | 0%       | 15%      | 1%       | 0       | 0%  |
| Turkey-West                    | 0%       | 5%       | 0%       | 0       | 0%  |

a. France

MS056

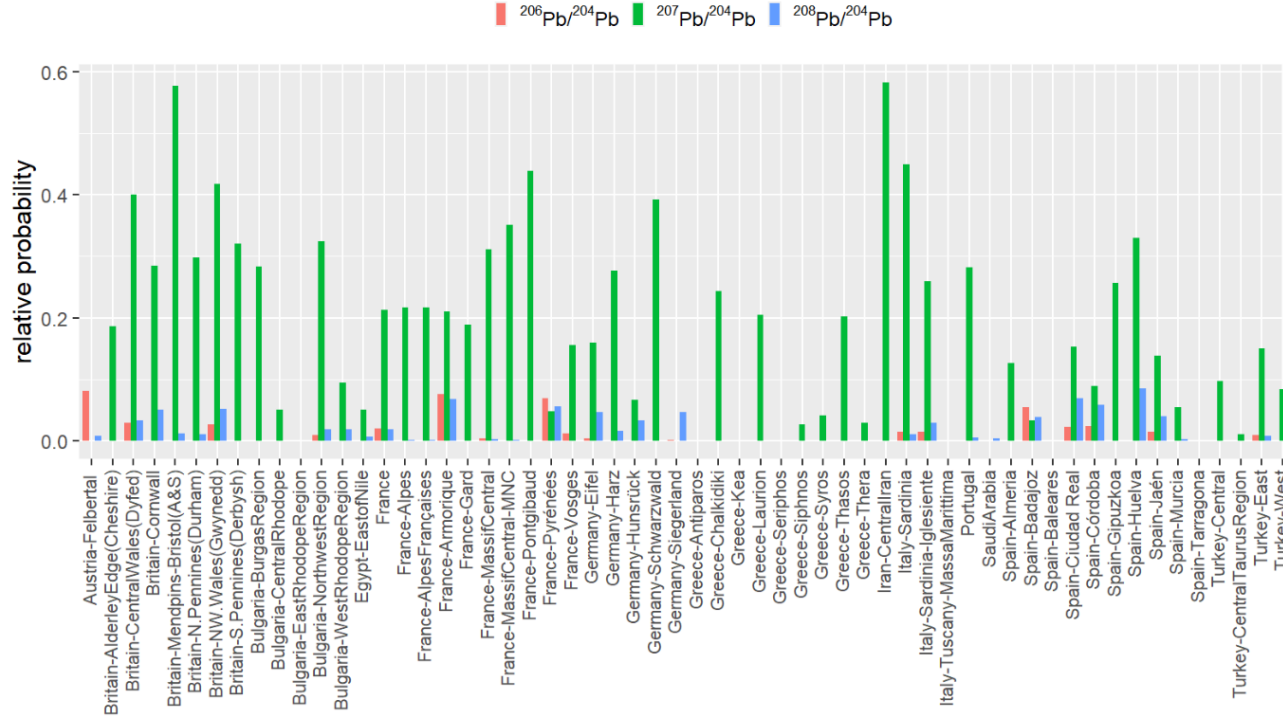

| Mining_Region                  | prob_206 | prob_207 | prob_208 | min>5%? | min |
|--------------------------------|----------|----------|----------|---------|-----|
| Austria-Felbertal              | 8%       | 0%       | 1%       | 0       | 0%  |
| Britain-AlderleyEdge(Cheshire) | 0%       | 19%      | 0%       | 0       | 0%  |
| Britain-CentralWales(Dyfed)    | 3%       | 40%      | 3%       | 0       | 3%  |
| Britain-Cornwall               | 0%       | 28%      | 5%       | 0       | 0%  |
| Britain-Mendips-Bristol(A&S)   | 0%       | 58%      | 1%       | 0       | 0%  |
| Britain-N.Pennines(Durham)     | 0%       | 30%      | 1%       | 0       | 0%  |
| Britain-NW.Wales(Gwynedd)      | 3%       | 42%      | 5%       | 0       | 3%  |
| Britain-S.Pennines(Derbysh)    | 0%       | 32%      | 0%       | 0       | 0%  |
| Bulgaria-BurgasRegion          | 0%       | 28%      | 0%       | 0       | 0%  |
| Bulgaria-CentralRhodope        | 0%       | 5%       | 0%       | 0       | 0%  |
| Bulgaria-EastRhodopeRegion     | 0%       | 0%       | 0%       | 0       | 0%  |
| Bulgaria-NorthwestRegion       | 1%       | 32%      | 2%       | 0       | 1%  |
| Bulgaria-WestRhodopeRegion     | 0%       | 10%      | 2%       | 0       | 0%  |
| Egypt-EastofNile               | 0%       | 5%       | 1%       | 0       | 0%  |
| France                         | 2%       | 21%      | 2%       | 0       | 2%  |
| France-Alpes                   | 0%       | 22%      | 0%       | 0       | 0%  |
| France-AlpesFrançaises         | 0%       | 22%      | 0%       | 1       | 7%  |
| France-Armorique               | 8%       | 21%      | 7%       | 0       | 0%  |
| France-Gard                    | 0%       | 19%      | 0%       | 0       | 0%  |
| France-MassifCentral           | 0%       | 31%      | 0%       | 0       | 0%  |
| France-MassifCentral-MNC       | 0%       | 35%      | 0%       | 0       | 0%  |
| France-Pontgibaud              | 0%       | 44%      | 0%       | 0       | 0%  |
| France-Pyrénées                | 7%       | 5%       | 6%       | 0       | 5%  |
| France-Vosges                  | 1%       | 16%      | 0%       | 0       | 0%  |
| Germany-Elifel                 | 0%       | 16%      | 5%       | 0       | 0%  |
| Germany-Harz                   | 0%       | 28%      | 2%       | 0       | 0%  |
| Germany-Hunsrück               | 0%       | 7%       | 3%       | 0       | 0%  |
| Germany-Schwarzwald            | 0%       | 39%      | 0%       | 0       | 0%  |
| Germany-Siegerland             | 0%       | 0%       | 5%       | 0       | 0%  |
| Greece-Antiparos               | 0%       | 0%       | 0%       | 0       | 0%  |
| Greece-Chalkidiki              | 0%       | 24%      | 0%       | 0       | 0%  |
| Greece-Kea                     | 0%       | 0%       | 0%       | 0       | 0%  |
| Greece-Laurion                 | 0%       | 21%      | 0%       | 0       | 0%  |
| Greece-Seriphos                | 0%       | 0%       | 0%       | 0       | 0%  |
| Greece-Siphnos                 | 0%       | 3%       | 0%       | 0       | 0%  |
| Greece-Syros                   | 0%       | 4%       | 0%       | 0       | 0%  |
| Greece-Thasos                  | 0%       | 20%      | 0%       | 0       | 0%  |
| Greece-Thera                   | 0%       | 3%       | 0%       | 0       | 0%  |
| Iran-CentralIran               | 0%       | 58%      | 0%       | 0       | 0%  |
| Italy-Sardinia                 | 2%       | 45%      | 1%       | 0       | 1%  |
| Italy-Sardinia-Iglesiente      | 1%       | 26%      | 3%       | 0       | 1%  |
| Italy-Tuscany-MassaMarittima   | 0%       | 0%       | 0%       | 0       | 0%  |
| Portugal                       | 0%       | 28%      | 1%       | 0       | 0%  |
| SaudiArabia                    | 0%       | 0%       | 0%       | 0       | 0%  |
| Spain-Almeria                  | 0%       | 13%      | 0%       | 0       | 0%  |
| Spain-Badajoz                  | 5%       | 3%       | 4%       | 0       | 3%  |
| Spain-Baleares                 | 0%       | 0%       | 0%       | 0       | 0%  |
| Spain-Ciudad Real              | 2%       | 15%      | 7%       | 0       | 2%  |
| Spain-Córdoba                  | 2%       | 9%       | 6%       | 0       | 2%  |
| Spain-Gipuzkoa                 | 0%       | 26%      | 0%       | 0       | 0%  |
| Spain-Huelva                   | 0%       | 33%      | 9%       | 0       | 0%  |
| Spain-Jaén                     | 1%       | 14%      | 4%       | 0       | 1%  |
| Spain-Murcia                   | 0%       | 6%       | 0%       | 0       | 0%  |
| Spain-Tarragona                | 0%       | 0%       | 0%       | 0       | 0%  |
| Turkey-Central                 | 0%       | 10%      | 0%       | 0       | 0%  |
| Turkey-CentralTaurusRegion     | 0%       | 1%       | 0%       | 0       | 0%  |
| Turkey-East                    | 1%       | 15%      | 1%       | 0       | 1%  |
| Turkey-West                    | 0%       | 8%       | 0%       | 0       | 0%  |

b. Portugal – NW Europe

7-Denarius-Marcia

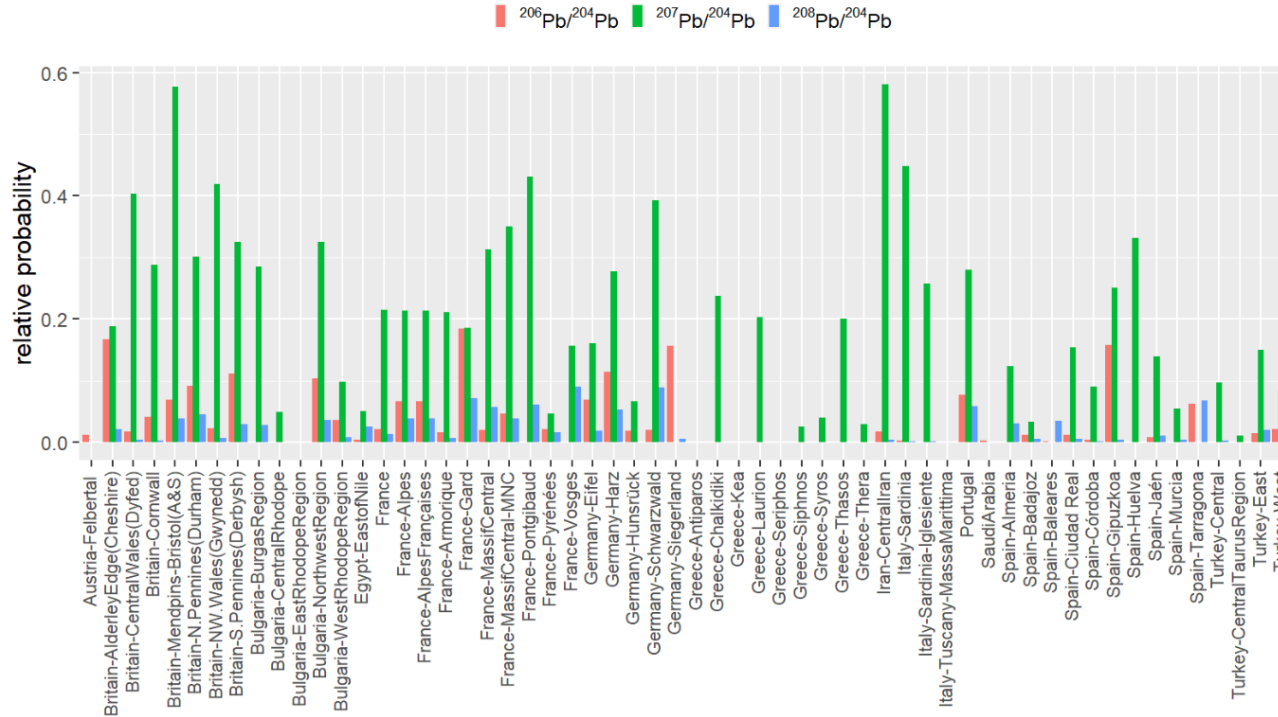

| Mining_Region                  | prob_206 | prob_207 | prob_208 | min>5%? | min |
|--------------------------------|----------|----------|----------|---------|-----|
| Austria-Felbertal              | 1%       | 0%       | 0%       |         | 0   |
| Britain-AlderleyEdge(Cheshire) | 17%      | 19%      | 2%       |         | 0   |
| Britain-CentralWales(Dyfed)    | 2%       | 40%      | 0%       |         | 0   |
| Britain-Cornwall               | 4%       | 29%      | 0%       |         | 0   |
| Britain-Mendpins-Bristol(A&S)  | 7%       | 58%      | 4%       |         | 0   |
| Britain-N.Pennines(Durham)     | 9%       | 30%      | 5%       |         | 0   |
| Britain-NW.Wales(Gwynedd)      | 2%       | 42%      | 1%       |         | 0   |
| Britain-S.Pennines(Derbysh)    | 11%      | 33%      | 3%       |         | 0   |
| Bulgaria-BurgasRegion          | 0%       | 29%      | 3%       |         | 0   |
| Bulgaria-CentralRhodope        | 0%       | 5%       | 0%       |         | 0   |
| Bulgaria-EastRhodopeRegion     | 0%       | 0%       | 0%       |         | 0   |
| Bulgaria-NorthwestRegion       | 10%      | 33%      | 4%       |         | 0   |
| Bulgaria-WestRhodopeRegion     | 4%       | 10%      | 1%       |         | 0   |
| Egypt-EastofNile               | 0%       | 5%       | 2%       |         | 0   |
| France                         | 2%       | 21%      | 1%       |         | 0   |
| France-Alpes                   | 7%       | 21%      | 4%       |         | 0   |
| France-AlpesFrançaises         | 7%       | 21%      | 4%       |         | 0   |
| France-Armorique               | 2%       | 21%      | 1%       |         | 0   |
| France-Gard                    | 18%      | 19%      | 7%       |         | 1   |
| France-MassifCentral           | 2%       | 31%      | 6%       |         | 0   |
| France-MassifCentral-MNC       | 5%       | 35%      | 4%       |         | 0   |
| France-Pontgibaud              | 0%       | 43%      | 6%       |         | 0   |
| France-Pyrénées                | 2%       | 5%       | 2%       |         | 0   |
| France-Vosges                  | 0%       | 16%      | 9%       |         | 0   |
| Germany-Eifel                  | 7%       | 16%      | 2%       |         | 0   |
| Germany-Harz                   | 11%      | 28%      | 5%       |         | 1   |
| Germany-Hunsrück               | 2%       | 7%       | 0%       |         | 0   |
| Germany-Schwarzwald            | 2%       | 39%      | 9%       |         | 0   |
| Germany-Siegerland             | 16%      | 0%       | 0%       |         | 0   |
| Greece-Antiparos               | 0%       | 0%       | 0%       |         | 0   |
| Greece-Chalkidiki              | 0%       | 24%      | 0%       |         | 0   |
| Greece-Kea                     | 0%       | 0%       | 0%       |         | 0   |
| Greece-Laurion                 | 0%       | 20%      | 0%       |         | 0   |
| Greece-Seriphos                | 0%       | 0%       | 0%       |         | 0   |
| Greece-Siphnos                 | 0%       | 3%       | 0%       |         | 0   |
| Greece-Syros                   | 0%       | 4%       | 0%       |         | 0   |
| Greece-Thasos                  | 0%       | 20%      | 0%       |         | 0   |
| Greece-Thera                   | 0%       | 3%       | 0%       |         | 0   |
| Iran-CentralIran               | 2%       | 58%      | 0%       |         | 0   |
| Italy-Sardinia                 | 0%       | 45%      | 0%       |         | 0   |
| Italy-Sardinia-Iglesiente      | 0%       | 26%      | 0%       |         | 0   |
| Italy-Tuscany-MassaMarittima   | 0%       | 0%       | 0%       |         | 0   |
| Portugal                       | 8%       | 28%      | 6%       |         | 1   |
| SaudiArabia                    | 0%       | 0%       | 0%       |         | 0   |
| Spain-Almeria                  | 0%       | 12%      | 3%       |         | 0   |
| Spain-Badajoz                  | 1%       | 3%       | 1%       |         | 0   |
| Spain-Baleares                 | 0%       | 0%       | 3%       |         | 0   |
| Spain-Ciudad Real              | 1%       | 15%      | 1%       |         | 0   |
| Spain-Córdoba                  | 0%       | 9%       | 0%       |         | 0   |
| Spain-Gipuzkoa                 | 16%      | 25%      | 0%       |         | 0   |
| Spain-Huelva                   | 0%       | 33%      | 0%       |         | 0   |
| Spain-Jaén                     | 1%       | 14%      | 1%       |         | 0   |
| Spain-Murcia                   | 0%       | 5%       | 0%       |         | 0   |
| Spain-Tarragona                | 6%       | 0%       | 7%       |         | 0   |
| Turkey-Central                 | 0%       | 10%      | 0%       |         | 0   |
| Turkey-CentralTaurusRegion     | 0%       | 1%       | 0%       |         | 0   |
| Turkey-East                    | 1%       | 15%      | 2%       |         | 0   |
| Turkey-West                    | 2%       | 8%       | 0%       |         | 0   |

# 17-Quadrigatus-28-3

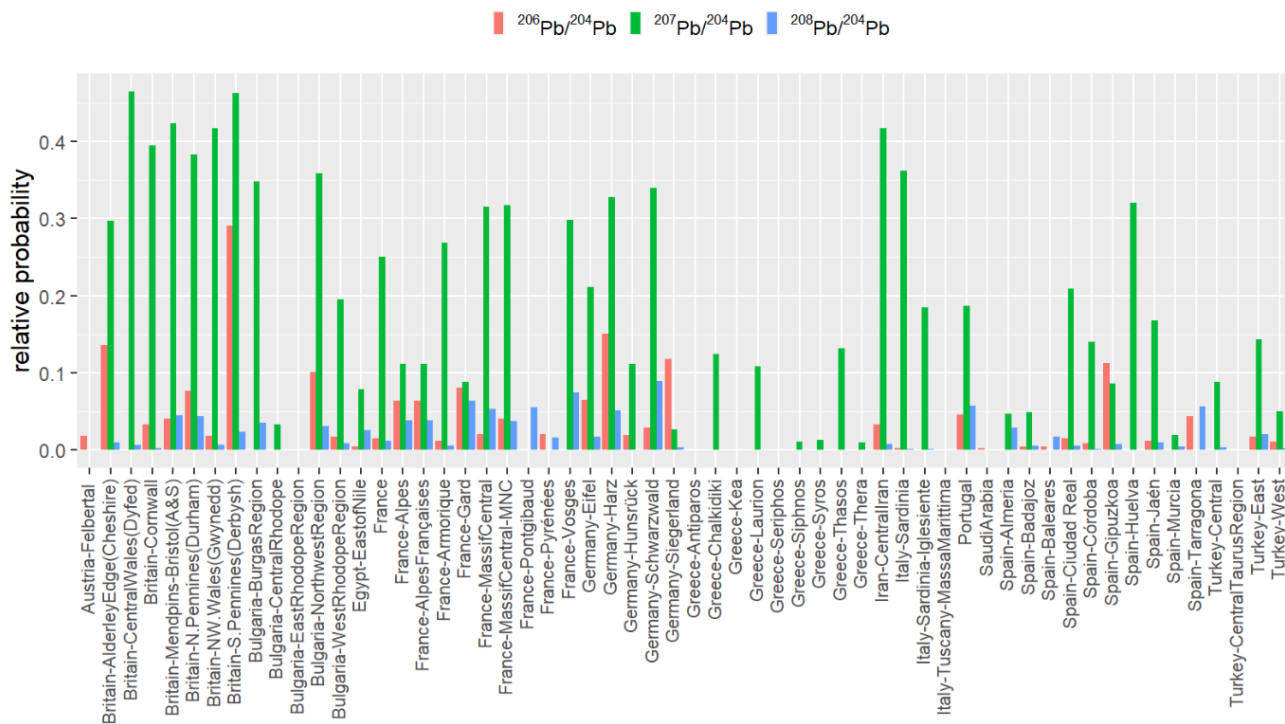

| Mining_Region                  | prob_206 | prob_207 | prob_208 | min>5%? | min |
|--------------------------------|----------|----------|----------|---------|-----|
| Austria-Felbertal              | 2%       | 0%       | 0%       | 0       | 0%  |
| Britain-AlderleyEdge(Cheshire) | 14%      | 30%      | 1%       | 0       | 1%  |
| Britain-CentralWales(Dyfed)    | 0%       | 46%      | 1%       | 0       | 0%  |
| Britain-Cornwall               | 3%       | 39%      | 0%       | 0       | 0%  |
| Britain-Mendpms-Bristol(A&S)   | 4%       | 42%      | 4%       | 0       | 4%  |
| Britain-N.Pennines(Durham)     | 8%       | 38%      | 4%       | 0       | 4%  |
| Britain-NW.Wales(Gwynedd)      | 2%       | 42%      | 1%       | 0       | 1%  |
| Britain-S.Pennines(Derbysh)    | 29%      | 46%      | 2%       | 0       | 2%  |
| Bulgaria-BurgasRegion          | 0%       | 35%      | 4%       | 0       | 0%  |
| Bulgaria-CentralRhodope        | 0%       | 3%       | 0%       | 0       | 0%  |
| Bulgaria-EastRhodopeRegion     | 0%       | 0%       | 0%       | 0       | 0%  |
| Bulgaria-NorthwestRegion       | 10%      | 36%      | 3%       | 0       | 3%  |
| Bulgaria-WestRhodopeRegion     | 2%       | 20%      | 1%       | 0       | 1%  |
| Egypt-EastofNile               | 0%       | 8%       | 3%       | 0       | 0%  |
| France                         | 1%       | 25%      | 1%       | 0       | 1%  |
| France-Alpes                   | 6%       | 11%      | 4%       | 0       | 4%  |
| France-AlpesFrançaises         | 6%       | 11%      | 4%       | 0       | 4%  |
| France-Armorique               | 1%       | 27%      | 0%       | 0       | 0%  |
| France-Gard                    | 8%       | 9%       | 6%       | 1       | 6%  |
| France-MassifCentral           | 2%       | 31%      | 5%       | 0       | 2%  |
| France-MassifCentral-MNC       | 4%       | 32%      | 4%       | 0       | 4%  |
| France-Pontgibaud              | 0%       | 0%       | 6%       | 0       | 0%  |
| France-Pyrénées                | 2%       | 0%       | 2%       | 0       | 0%  |
| France-Vosges                  | 0%       | 30%      | 7%       | 0       | 0%  |
| Germany-Eifel                  | 6%       | 21%      | 2%       | 0       | 2%  |
| Germany-Harz                   | 15%      | 33%      | 5%       | 1       | 5%  |
| Germany-Hunsrück               | 2%       | 11%      | 0%       | 0       | 0%  |
| Germany-Schwarzwald            | 3%       | 34%      | 9%       | 0       | 3%  |
| Germany-Siegerland             | 12%      | 3%       | 0%       | 0       | 0%  |
| Greece-Antiparos               | 0%       | 0%       | 0%       | 0       | 0%  |
| Greece-Chalkidiki              | 0%       | 12%      | 0%       | 0       | 0%  |
| Greece-Kea                     | 0%       | 0%       | 0%       | 0       | 0%  |
| Greece-Laurion                 | 0%       | 11%      | 0%       | 0       | 0%  |
| Greece-Seriphos                | 0%       | 0%       | 0%       | 0       | 0%  |
| Greece-Siphos                  | 0%       | 1%       | 0%       | 0       | 0%  |
| Greece-Syros                   | 0%       | 1%       | 0%       | 0       | 0%  |
| Greece-Thasos                  | 0%       | 13%      | 0%       | 0       | 0%  |
| Greece-Thera                   | 0%       | 1%       | 0%       | 0       | 0%  |
| Iran-CentralIran               | 3%       | 42%      | 1%       | 0       | 1%  |
| Italy-Sardinia                 | 0%       | 36%      | 0%       | 0       | 0%  |
| Italy-Sardinia-Iglesiente      | 0%       | 19%      | 0%       | 0       | 0%  |
| Italy-Tuscany-MassaMarittima   | 0%       | 0%       | 0%       | 0       | 0%  |
| Portugal                       | 5%       | 19%      | 6%       | 0       | 5%  |
| SaudiArabia                    | 0%       | 0%       | 0%       | 0       | 0%  |
| Spain-Almeria                  | 0%       | 5%       | 3%       | 0       | 0%  |
| Spain-Badajoz                  | 0%       | 5%       | 1%       | 0       | 0%  |
| Spain-Baleares                 | 0%       | 0%       | 2%       | 0       | 0%  |
| Spain-Ciudad Real              | 1%       | 21%      | 1%       | 0       | 1%  |
| Spain-Córdoba                  | 1%       | 14%      | 0%       | 0       | 0%  |
| Spain-Gipuzkoa                 | 11%      | 9%       | 1%       | 0       | 0%  |
| Spain-Huelva                   | 0%       | 32%      | 0%       | 0       | 0%  |
| Spain-Jaén                     | 1%       | 17%      | 1%       | 0       | 1%  |
| Spain-Murcia                   | 0%       | 2%       | 0%       | 0       | 0%  |
| Spain-Tarragona                | 4%       | 0%       | 6%       | 0       | 0%  |
| Turkey-Central                 | 0%       | 9%       | 0%       | 0       | 0%  |
| Turkey-CentralTaurusRegion     | 0%       | 0%       | 0%       | 0       | 0%  |
| Turkey-East                    | 2%       | 14%      | 2%       | 0       | 2%  |
| Turkey-West                    | 1%       | 5%       | 0%       | 0       | 0%  |

DE003

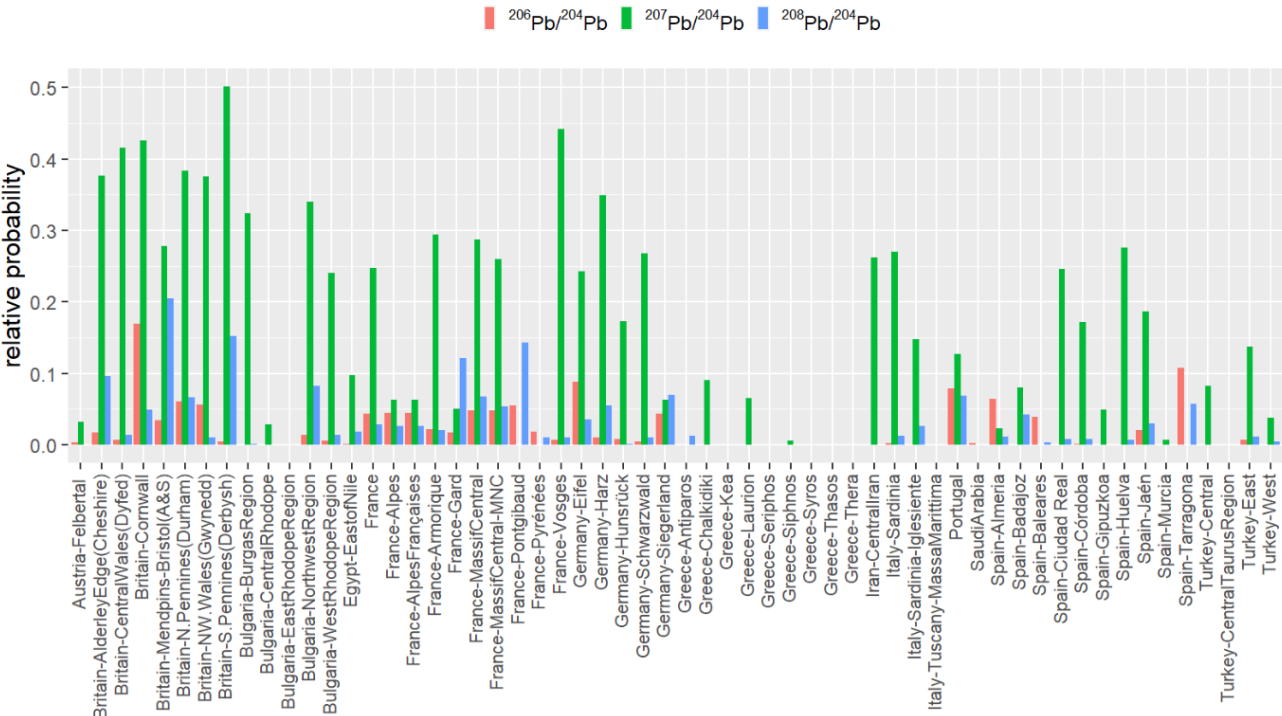

| Mining_Region                  | prob_206 | prob_207 | prob_208 | min>5%? | min |
|--------------------------------|----------|----------|----------|---------|-----|
| Austria-Felbertal              | 0%       | 3%       | 0%       | 0       | 0%  |
| Britain-AlderleyEdge(Cheshire) | 2%       | 38%      | 10%      | 0       | 2%  |
| Britain-CentralWales(Dyfed)    | 1%       | 42%      | 1%       | 0       | 1%  |
| Britain-Cornwall               | 17%      | 43%      | 5%       | 0       | 5%  |
| Britain-Mendpins-Bristol(A&S)  | 3%       | 28%      | 21%      | 0       | 3%  |
| Britain-N.Pennines(Durham)     | 6%       | 38%      | 7%       | 1       | 6%  |
| Britain-NW.Wales(Gwynedd)      | 6%       | 38%      | 1%       | 0       | 1%  |
| Britain-S.Pennines(Derbysh)    | 0%       | 50%      | 15%      | 0       | 0%  |
| Bulgaria-BurgasRegion          | 0%       | 32%      | 0%       | 0       | 0%  |
| Bulgaria-CentralRhodope        | 0%       | 3%       | 0%       | 0       | 0%  |
| Bulgaria-EastRhodopeRegion     | 0%       | 0%       | 0%       | 0       | 0%  |
| Bulgaria-NorthwestRegion       | 1%       | 34%      | 8%       | 0       | 1%  |
| Bulgaria-WestRhodopeRegion     | 1%       | 24%      | 1%       | 0       | 1%  |
| Egypt-EastofNile               | 0%       | 10%      | 2%       | 0       | 0%  |
| France                         | 4%       | 25%      | 3%       | 0       | 3%  |
| France-Alpes                   | 4%       | 6%       | 3%       | 0       | 3%  |
| France-AlpesFrançaises         | 4%       | 6%       | 3%       | 0       | 3%  |
| France-Armorique               | 2%       | 29%      | 2%       | 0       | 2%  |
| France-Gard                    | 2%       | 5%       | 12%      | 0       | 2%  |
| France-MassifCentral           | 5%       | 29%      | 7%       | 0       | 5%  |
| France-MassifCentral-MNC       | 5%       | 26%      | 5%       | 0       | 5%  |
| France-Pontgibaud              | 5%       | 0%       | 14%      | 0       | 0%  |
| France-Pyrénées                | 2%       | 0%       | 1%       | 0       | 0%  |
| France-Vosges                  | 1%       | 44%      | 1%       | 0       | 1%  |
| Germany-Eifel                  | 9%       | 24%      | 4%       | 0       | 4%  |
| Germany-Harz                   | 1%       | 35%      | 5%       | 0       | 1%  |
| Germany-Hunsrück               | 1%       | 17%      | 0%       | 0       | 0%  |
| Germany-Schwarzwald            | 0%       | 27%      | 1%       | 0       | 0%  |
| Germany-Siegerland             | 4%       | 6%       | 7%       | 0       | 4%  |
| Greece-Antiparos               | 0%       | 0%       | 1%       | 0       | 0%  |
| Greece-Chalkidiki              | 0%       | 9%       | 0%       | 0       | 0%  |
| Greece-Kea                     | 0%       | 0%       | 0%       | 0       | 0%  |
| Greece-Laurion                 | 0%       | 7%       | 0%       | 0       | 0%  |
| Greece-Seriphos                | 0%       | 0%       | 0%       | 0       | 0%  |
| Greece-Siphnos                 | 0%       | 1%       | 0%       | 0       | 0%  |
| Greece-Syros                   | 0%       | 0%       | 0%       | 0       | 0%  |
| Greece-Thasos                  | 0%       | 0%       | 0%       | 0       | 0%  |
| Greece-Thera                   | 0%       | 0%       | 0%       | 0       | 0%  |
| Iran-Centrallran               | 0%       | 26%      | 0%       | 0       | 0%  |
| Italy-Sardinia                 | 0%       | 27%      | 1%       | 0       | 0%  |
| Italy-Sardinia-Iglesiente      | 0%       | 15%      | 3%       | 0       | 0%  |
| Italy-Tuscany-MassaMarittima   | 0%       | 0%       | 0%       | 0       | 0%  |
| Portugal                       | 8%       | 13%      | 7%       | 1       | 7%  |
| SaudiArabia                    | 0%       | 0%       | 0%       | 0       | 0%  |
| Spain-Almeria                  | 6%       | 2%       | 1%       | 0       | 1%  |
| Spain-Badajoz                  | 0%       | 8%       | 4%       | 0       | 0%  |
| Spain-Baleares                 | 4%       | 0%       | 0%       | 0       | 0%  |
| Spain-Ciudad Real              | 0%       | 25%      | 1%       | 0       | 0%  |
| Spain-Córdoba                  | 0%       | 17%      | 1%       | 0       | 0%  |
| Spain-Gipuzkoa                 | 0%       | 5%       | 0%       | 0       | 0%  |
| Spain-Huelva                   | 0%       | 28%      | 1%       | 0       | 0%  |
| Spain-Jaén                     | 2%       | 19%      | 3%       | 0       | 2%  |
| Spain-Murcia                   | 0%       | 1%       | 0%       | 0       | 0%  |
| Spain-Tarragona                | 11%      | 0%       | 6%       | 0       | 0%  |
| Turkey-Central                 | 0%       | 8%       | 0%       | 0       | 0%  |
| Turkey-CentralTaurusRegion     | 0%       | 0%       | 0%       | 0       | 0%  |
| Turkey-East                    | 1%       | 14%      | 1%       | 0       | 1%  |
| Turkey-West                    | 0%       | 4%       | 0%       | 0       | 0%  |



MS027

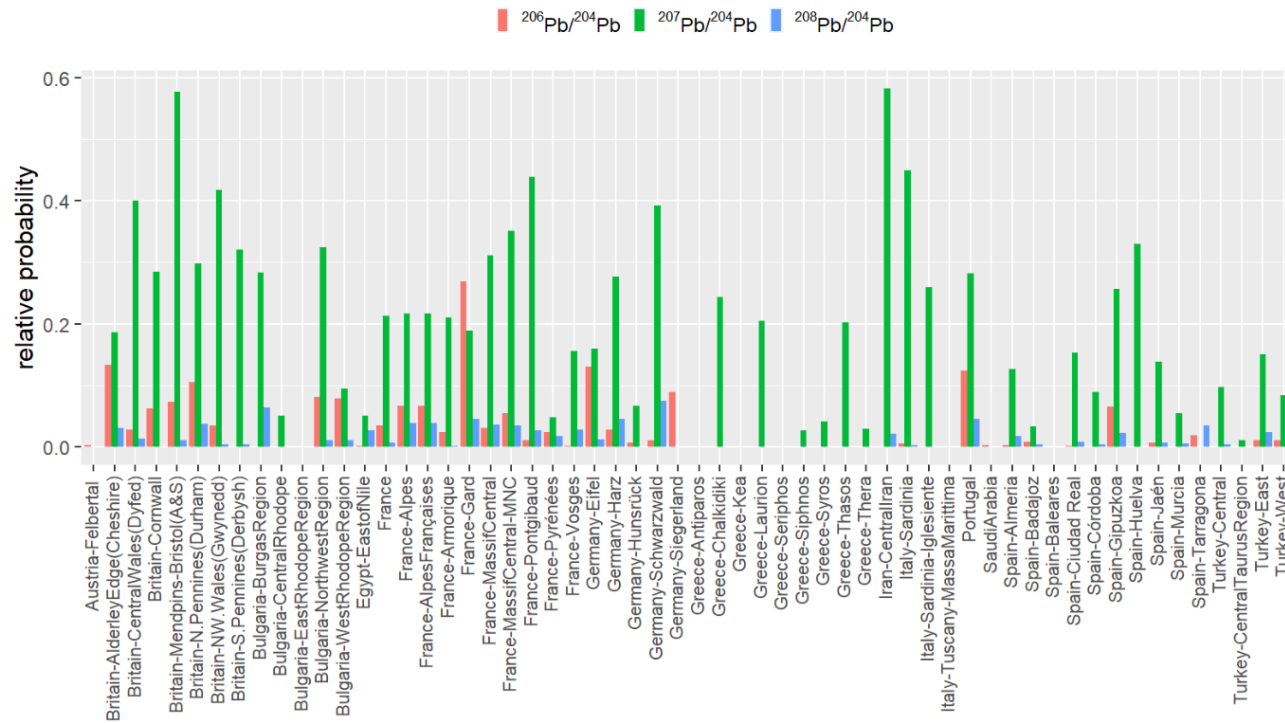

| Mining_Region                  | prob_206 | prob_207 | prob_208 | min>5%? | min |
|--------------------------------|----------|----------|----------|---------|-----|
| Austria-Felbertal              | 0%       | 0%       | 0%       | 0       | 0%  |
| Britain-AlderleyEdge(Cheshire) | 13%      | 19%      | 3%       | 0       | 3%  |
| Britain-CentralWales(Dyfed)    | 3%       | 40%      | 1%       | 0       | 1%  |
| Britain-Cornwall               | 6%       | 28%      | 0%       | 0       | 0%  |
| Britain-Mendips-Bristol(A&S)   | 7%       | 58%      | 1%       | 0       | 1%  |
| Britain-N. Pennines(Durham)    | 10%      | 30%      | 4%       | 0       | 4%  |
| Britain-NW. Wales(Gwynedd)     | 3%       | 42%      | 0%       | 0       | 0%  |
| Britain-S. Pennines(Derbysh)   | 0%       | 32%      | 0%       | 0       | 0%  |
| Bulgaria-BurgasRegion          | 0%       | 28%      | 6%       | 0       | 0%  |
| Bulgaria-CentralRhodope        | 0%       | 5%       | 0%       | 0       | 0%  |
| Bulgaria-EastRhodopeRegion     | 0%       | 0%       | 0%       | 0       | 0%  |
| Bulgaria-NorthwestRegion       | 8%       | 32%      | 1%       | 0       | 1%  |
| Bulgaria-WestRhodopeRegion     | 8%       | 10%      | 1%       | 0       | 1%  |
| Egypt-EastofNile               | 0%       | 5%       | 3%       | 0       | 0%  |
| France                         | 4%       | 21%      | 1%       | 0       | 1%  |
| France-Alpes                   | 7%       | 22%      | 4%       | 0       | 4%  |
| France-AlpesFrançaises         | 7%       | 22%      | 4%       | 0       | 4%  |
| France-Armorique               | 2%       | 21%      | 0%       | 0       | 0%  |
| France-Gard                    | 27%      | 19%      | 4%       | 0       | 4%  |
| France-MassifCentral           | 3%       | 31%      | 4%       | 0       | 3%  |
| France-MassifCentral-MNC       | 5%       | 35%      | 3%       | 0       | 3%  |
| France-Pontgibaud              | 1%       | 44%      | 3%       | 0       | 1%  |
| France-Pyrénées                | 2%       | 5%       | 2%       | 0       | 2%  |
| France-Vosges                  | 0%       | 16%      | 3%       | 0       | 0%  |
| Germany-Eifel                  | 13%      | 16%      | 1%       | 0       | 1%  |
| Germany-Harz                   | 3%       | 28%      | 5%       | 0       | 3%  |
| Germany-Hunsrück               | 1%       | 7%       | 0%       | 0       | 0%  |
| Germany-Schwarzwald            | 1%       | 39%      | 7%       | 0       | 1%  |
| Germany-Siegerland             | 9%       | 0%       | 0%       | 0       | 0%  |
| Greece-Antiparos               | 0%       | 0%       | 0%       | 0       | 0%  |
| Greece-Chalkidiki              | 0%       | 24%      | 0%       | 0       | 0%  |
| Greece-Kea                     | 0%       | 0%       | 0%       | 0       | 0%  |
| Greece-Laurion                 | 0%       | 21%      | 0%       | 0       | 0%  |
| Greece-Seriphos                | 0%       | 0%       | 0%       | 0       | 0%  |
| Greece-Siphnos                 | 0%       | 3%       | 0%       | 0       | 0%  |
| Greece-Syros                   | 0%       | 4%       | 0%       | 0       | 0%  |
| Greece-Thasos                  | 0%       | 20%      | 0%       | 0       | 0%  |
| Greece-Thera                   | 0%       | 3%       | 0%       | 0       | 0%  |
| Iran-CentrallIran              | 0%       | 58%      | 2%       | 0       | 0%  |
| Italy-Sardinia                 | 1%       | 45%      | 0%       | 0       | 0%  |
| Italy-Sardinia-Iglesiente      | 0%       | 26%      | 0%       | 0       | 0%  |
| Italy-Tuscany-MassaMarittima   | 0%       | 0%       | 0%       | 0       | 0%  |
| Portugal                       | 12%      | 28%      | 5%       | 0       | 5%  |
| SaudiArabia                    | 0%       | 0%       | 0%       | 0       | 0%  |
| Spain-Almeria                  | 0%       | 13%      | 2%       | 0       | 0%  |
| Spain-Badajoz                  | 1%       | 3%       | 0%       | 0       | 0%  |
| Spain-Baleares                 | 0%       | 0%       | 0%       | 0       | 0%  |
| Spain-Ciudad Real              | 0%       | 15%      | 1%       | 0       | 0%  |
| Spain-Córdoba                  | 0%       | 9%       | 0%       | 0       | 0%  |
| Spain-Gipuzkoa                 | 7%       | 26%      | 2%       | 0       | 2%  |
| Spain-Huelva                   | 0%       | 33%      | 0%       | 0       | 0%  |
| Spain-Jaén                     | 1%       | 14%      | 1%       | 0       | 1%  |
| Spain-Murcia                   | 0%       | 6%       | 0%       | 0       | 0%  |
| Spain-Tarragona                | 2%       | 0%       | 3%       | 0       | 0%  |
| Turkey-Central                 | 0%       | 10%      | 0%       | 0       | 0%  |
| Turkey-CentralTaurusRegion     | 0%       | 1%       | 0%       | 0       | 0%  |
| Turkey-East                    | 1%       | 15%      | 2%       | 0       | 1%  |
| Turkey-West                    | 1%       | 8%       | 0%       | 0       | 0%  |

MS039

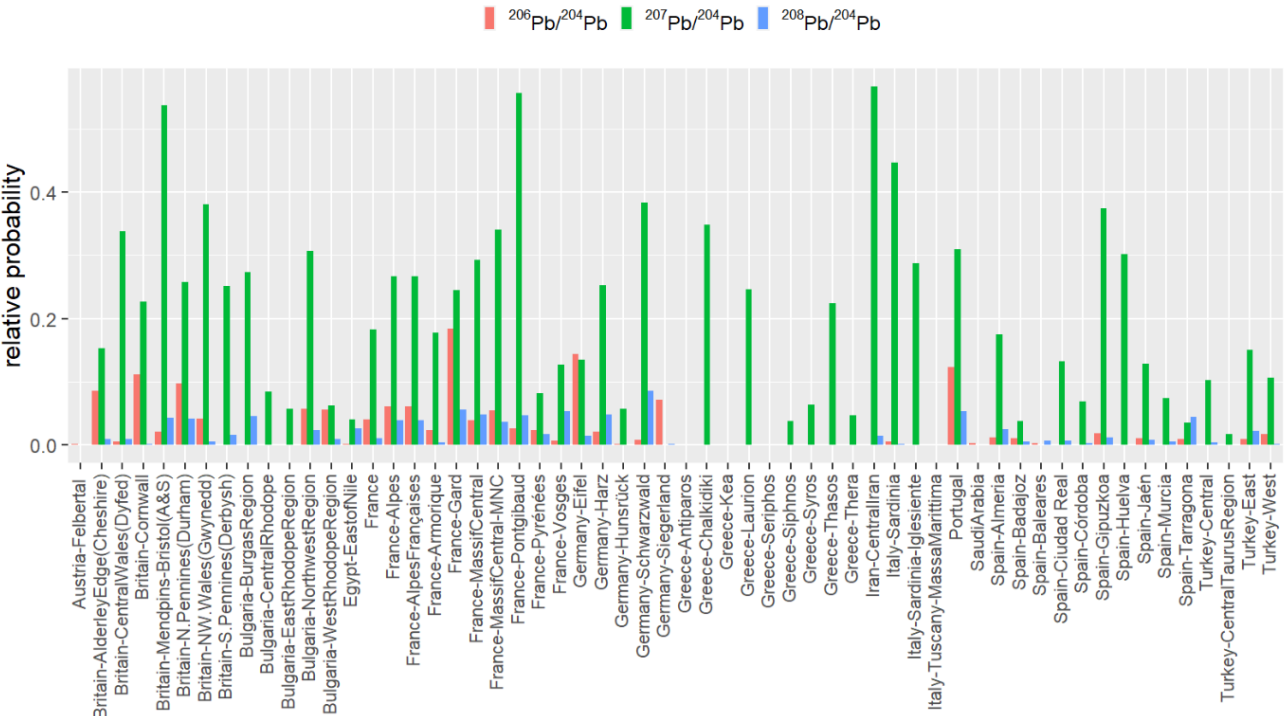

| Mining_Region                  | prob_206 | prob_207 | prob_208 | min>5%? | min |
|--------------------------------|----------|----------|----------|---------|-----|
| Austria-Felbertal              | 0%       | 0%       | 0%       | 0       | 0%  |
| Britain-AlderleyEdge(Cheshire) | 8%       | 15%      | 1%       | 0       | 1%  |
| Britain-CentralWales(Dyfed)    | 0%       | 34%      | 1%       | 0       | 0%  |
| Britain-Cornwall               | 11%      | 23%      | 0%       | 0       | 0%  |
| Britain-Mendpins-Bristol(A&S)  | 2%       | 54%      | 4%       | 0       | 2%  |
| Britain-N.Pennines(Durham)     | 10%      | 26%      | 4%       | 0       | 4%  |
| Britain-NW.Wales(Gwynedd)      | 4%       | 38%      | 1%       | 0       | 1%  |
| Britain-S.Pennines(Derbysh)    | 0%       | 25%      | 2%       | 0       | 0%  |
| Bulgaria-BurgasRegion          | 0%       | 27%      | 5%       | 0       | 0%  |
| Bulgaria-CentralRhodope        | 0%       | 8%       | 0%       | 0       | 0%  |
| Bulgaria-EastRhodopeRegion     | 0%       | 6%       | 0%       | 0       | 0%  |
| Bulgaria-NorthwestRegion       | 6%       | 31%      | 2%       | 0       | 2%  |
| Bulgaria-WestRhodopeRegion     | 6%       | 6%       | 1%       | 0       | 1%  |
| Egypt-EastofNile               | 0%       | 4%       | 3%       | 0       | 0%  |
| France                         | 4%       | 18%      | 1%       | 0       | 1%  |
| France-Alpes                   | 6%       | 27%      | 4%       | 0       | 4%  |
| France-AlpesFrançaises         | 6%       | 27%      | 4%       | 0       | 4%  |
| France-Armorique               | 2%       | 18%      | 0%       | 0       | 0%  |
| France-Gard                    | 18%      | 24%      | 6%       | 1       | 6%  |
| France-MassifCentral           | 4%       | 29%      | 5%       | 0       | 4%  |
| France-MassifCentral-MNC       | 5%       | 34%      | 4%       | 0       | 4%  |
| France-Pontgibaud              | 3%       | 56%      | 5%       | 0       | 3%  |
| France-Pyrénées                | 2%       | 8%       | 2%       | 0       | 2%  |
| France-Vosges                  | 1%       | 13%      | 5%       | 0       | 1%  |
| Germany-Eifel                  | 14%      | 14%      | 1%       | 0       | 1%  |
| Germany-Harz                   | 2%       | 25%      | 5%       | 0       | 2%  |
| Germany-Hunsrück               | 0%       | 6%       | 0%       | 0       | 0%  |
| Germany-Schwarzwald            | 1%       | 38%      | 9%       | 0       | 1%  |
| Germany-Siegerland             | 7%       | 0%       | 0%       | 0       | 0%  |
| Greece-Antiparos               | 0%       | 0%       | 0%       | 0       | 0%  |
| Greece-Chalkidiki              | 0%       | 35%      | 0%       | 0       | 0%  |
| Greece-Kea                     | 0%       | 0%       | 0%       | 0       | 0%  |
| Greece-Laurion                 | 0%       | 25%      | 0%       | 0       | 0%  |
| Greece-Seriphos                | 0%       | 0%       | 0%       | 0       | 0%  |
| Greece-Siphnos                 | 0%       | 4%       | 0%       | 0       | 0%  |
| Greece-Syros                   | 0%       | 6%       | 0%       | 0       | 0%  |
| Greece-Thasos                  | 0%       | 22%      | 0%       | 0       | 0%  |
| Greece-Thera                   | 0%       | 5%       | 0%       | 0       | 0%  |
| Iran-CentrallIran              | 0%       | 57%      | 1%       | 0       | 0%  |
| Italy-Sardinia-Iglesiente      | 0%       | 45%      | 0%       | 0       | 0%  |
| Italy-Sardinia-Iglesiente      | 0%       | 29%      | 0%       | 0       | 0%  |
| Italy-Tuscany-MassaMarittima   | 0%       | 0%       | 0%       | 0       | 0%  |
| Portugal                       | 12%      | 31%      | 5%       | 1       | 5%  |
| SaudiArabia                    | 0%       | 0%       | 0%       | 0       | 0%  |
| Spain-Almeria                  | 1%       | 17%      | 2%       | 0       | 1%  |
| Spain-Badajoz                  | 1%       | 4%       | 0%       | 0       | 0%  |
| Spain-Baleares                 | 0%       | 0%       | 1%       | 0       | 0%  |
| Spain-Ciudad Real              | 0%       | 13%      | 1%       | 0       | 0%  |
| Spain-Córdoba                  | 0%       | 7%       | 0%       | 0       | 0%  |
| Spain-Gipuzkoa                 | 2%       | 37%      | 1%       | 0       | 1%  |
| Spain-Huelva                   | 0%       | 30%      | 0%       | 0       | 0%  |
| Spain-Jaén                     | 1%       | 13%      | 1%       | 0       | 1%  |
| Spain-Murcia                   | 0%       | 7%       | 1%       | 0       | 0%  |
| Spain-Tarragona                | 1%       | 4%       | 4%       | 0       | 1%  |
| Turkey-Central                 | 0%       | 10%      | 0%       | 0       | 0%  |
| Turkey-CentralTaurusRegion     | 0%       | 2%       | 0%       | 0       | 0%  |
| Turkey-East                    | 1%       | 15%      | 2%       | 0       | 1%  |
| Turkey-West                    | 2%       | 11%      | 0%       | 0       | 0%  |

MS046

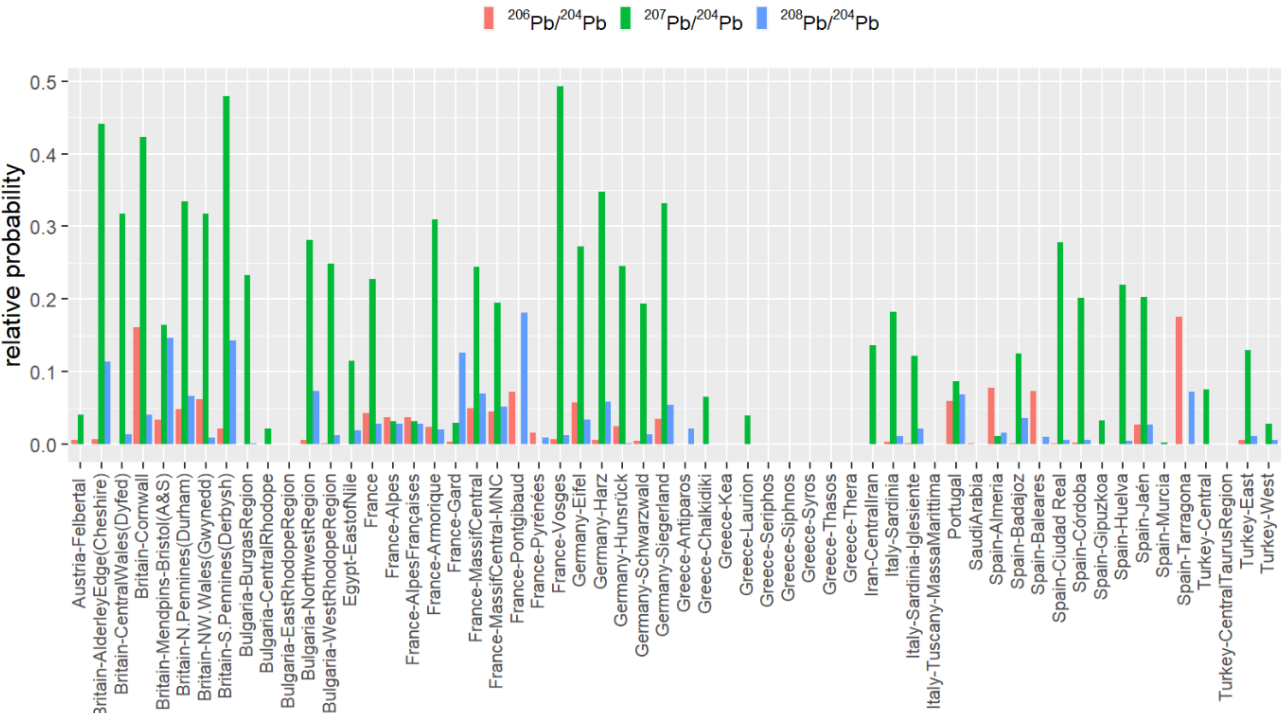

| Mining_Region                  | prob_206 | prob_207 | prob_208 | min>5%? | min |
|--------------------------------|----------|----------|----------|---------|-----|
| Austria-Felbertal              | 1%       | 4%       | 0%       | 0       | 0%  |
| Britain-AlderleyEdge(Cheshire) | 1%       | 44%      | 11%      | 0       | 1%  |
| Britain-CentralWales(Dyfed)    | 0%       | 32%      | 1%       | 0       | 0%  |
| Britain-Cornwall               | 16%      | 42%      | 4%       | 0       | 4%  |
| Britain-Mendpins-Bristol(A&S)  | 3%       | 16%      | 15%      | 0       | 3%  |
| Britain-N.Pennines(Durham)     | 5%       | 33%      | 7%       | 0       | 5%  |
| Britain-NW.Wales(Gwynedd)      | 6%       | 32%      | 1%       | 0       | 1%  |
| Britain-S.Pennines(Derbys)     | 2%       | 48%      | 14%      | 0       | 2%  |
| Bulgaria-BurgasRegion          | 0%       | 23%      | 0%       | 0       | 0%  |
| Bulgaria-CentralRhodope        | 0%       | 2%       | 0%       | 0       | 0%  |
| Bulgaria-EastRhodopeRegion     | 0%       | 0%       | 0%       | 0       | 0%  |
| Bulgaria-NorthwestRegion       | 1%       | 28%      | 7%       | 0       | 1%  |
| Bulgaria-WestRhodopeRegion     | 0%       | 25%      | 1%       | 0       | 0%  |
| Egypt-EastofNile               | 0%       | 12%      | 2%       | 0       | 0%  |
| France                         | 4%       | 23%      | 3%       | 0       | 3%  |
| France-Alpes                   | 4%       | 3%       | 3%       | 0       | 3%  |
| France-AlpesFrançaises         | 4%       | 3%       | 3%       | 0       | 3%  |
| France-Armorique               | 2%       | 31%      | 2%       | 0       | 2%  |
| France-Gard                    | 0%       | 3%       | 13%      | 0       | 0%  |
| France-MassifCentral           | 5%       | 24%      | 7%       | 0       | 5%  |
| France-MassifCentral-MNC       | 5%       | 20%      | 5%       | 0       | 5%  |
| France-Pontgibaud              | 7%       | 0%       | 18%      | 0       | 0%  |
| France-Pyrénées                | 2%       | 0%       | 1%       | 0       | 0%  |
| France-Vosges                  | 1%       | 49%      | 1%       | 0       | 1%  |
| Germany-Eifel                  | 6%       | 27%      | 3%       | 0       | 3%  |
| Germany-Harz                   | 1%       | 35%      | 6%       | 0       | 1%  |
| Germany-Hunsrück               | 3%       | 25%      | 0%       | 0       | 0%  |
| Germany-Schwarzwald            | 0%       | 19%      | 1%       | 0       | 0%  |
| Germany-Siegerland             | 4%       | 33%      | 5%       | 0       | 4%  |
| Greece-Antiparos               | 0%       | 0%       | 2%       | 0       | 0%  |
| Greece-Chalkidiki              | 0%       | 7%       | 0%       | 0       | 0%  |
| Greece-Kea                     | 0%       | 0%       | 0%       | 0       | 0%  |
| Greece-Laurion                 | 0%       | 4%       | 0%       | 0       | 0%  |
| Greece-Seriphos                | 0%       | 0%       | 0%       | 0       | 0%  |
| Greece-Siphnos                 | 0%       | 0%       | 0%       | 0       | 0%  |
| Greece-Syros                   | 0%       | 0%       | 0%       | 0       | 0%  |
| Greece-Thasos                  | 0%       | 0%       | 0%       | 0       | 0%  |
| Greece-Thera                   | 0%       | 0%       | 0%       | 0       | 0%  |
| Iran-Centrallran               | 0%       | 14%      | 0%       | 0       | 0%  |
| Italy-Sardinia                 | 0%       | 18%      | 1%       | 0       | 0%  |
| Italy-Sardinia-Iglesiente      | 0%       | 12%      | 2%       | 0       | 0%  |
| Italy-Tuscany-MassaMarittima   | 0%       | 0%       | 0%       | 0       | 0%  |
| Portugal                       | 6%       | 9%       | 7%       | 1       | 6%  |
| SaudiArabia                    | 0%       | 0%       | 0%       | 0       | 0%  |
| Spain-Almeria                  | 8%       | 1%       | 2%       | 0       | 1%  |
| Spain-Badajoz                  | 0%       | 13%      | 4%       | 0       | 0%  |
| Spain-Baleares                 | 7%       | 0%       | 1%       | 0       | 0%  |
| Spain-Ciudad Real              | 0%       | 28%      | 1%       | 0       | 0%  |
| Spain-Córdoba                  | 0%       | 20%      | 1%       | 0       | 0%  |
| Spain-Gipuzkoa                 | 0%       | 3%       | 0%       | 0       | 0%  |
| Spain-Huelva                   | 0%       | 22%      | 0%       | 0       | 0%  |
| Spain-Jaén                     | 3%       | 20%      | 3%       | 0       | 3%  |
| Spain-Murcia                   | 0%       | 0%       | 0%       | 0       | 0%  |
| Spain-Tarragona                | 18%      | 0%       | 7%       | 0       | 0%  |
| Turkey-Central                 | 0%       | 8%       | 0%       | 0       | 0%  |
| Turkey-CentralTaurusRegion     | 0%       | 0%       | 0%       | 0       | 0%  |
| Turkey-East                    | 1%       | 13%      | 1%       | 0       | 1%  |
| Turkey-West                    | 0%       | 3%       | 1%       | 0       | 0%  |

MS050

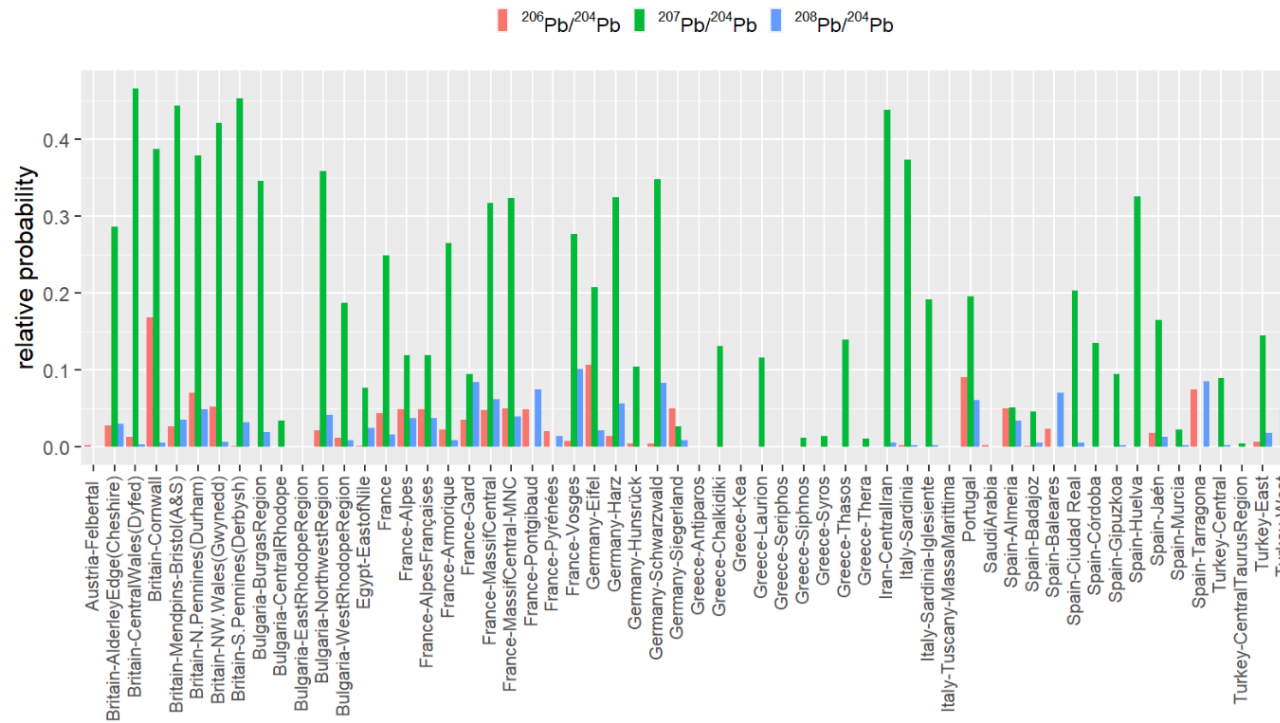

| Mining_Region                  | prob_206 | prob_207 | prob_208 | min>5%? | min |
|--------------------------------|----------|----------|----------|---------|-----|
| Austria-Felbertal              | 0%       | 0%       | 0%       | 0       | 0%  |
| Britain-AlderleyEdge(Cheshire) | 3%       | 29%      | 3%       | 0       | 3%  |
| Britain-CentralWales(Dyfed)    | 1%       | 47%      | 0%       | 0       | 0%  |
| Britain-Cornwall               | 17%      | 39%      | 1%       | 0       | 1%  |
| Britain-Mendips-Bristol(A&S)   | 3%       | 44%      | 3%       | 0       | 3%  |
| Britain-N.Pennines(Durham)     | 7%       | 38%      | 5%       | 0       | 5%  |
| Britain-NW.Wales(Gwynedd)      | 5%       | 42%      | 1%       | 0       | 1%  |
| Britain-S.Pennines(Derbysh)    | 0%       | 45%      | 3%       | 0       | 0%  |
| Bulgaria-BurgasRegion          | 0%       | 35%      | 2%       | 0       | 0%  |
| Bulgaria-CentralRhodope        | 0%       | 3%       | 0%       | 0       | 0%  |
| Bulgaria-EastRhodopeRegion     | 0%       | 0%       | 0%       | 0       | 0%  |
| Bulgaria-NorthwestRegion       | 2%       | 36%      | 4%       | 0       | 2%  |
| Bulgaria-WestRhodopeRegion     | 1%       | 19%      | 1%       | 0       | 1%  |
| Egypt-EastofNile               | 0%       | 8%       | 2%       | 0       | 0%  |
| France                         | 4%       | 25%      | 2%       | 0       | 2%  |
| France-Alpes                   | 5%       | 12%      | 4%       | 0       | 4%  |
| France-AlpesFrançaises         | 5%       | 12%      | 4%       | 0       | 4%  |
| France-Armorique               | 2%       | 26%      | 1%       | 0       | 1%  |
| France-Gard                    | 4%       | 9%       | 8%       | 0       | 4%  |
| France-MassifCentral           | 5%       | 32%      | 6%       | 0       | 5%  |
| France-MassifCentral-MNC       | 5%       | 32%      | 4%       | 0       | 4%  |
| France-Pontgibaud              | 5%       | 0%       | 7%       | 0       | 0%  |
| France-Pyrénées                | 2%       | 0%       | 1%       | 0       | 0%  |
| France-Vosges                  | 1%       | 28%      | 10%      | 0       | 1%  |
| Germany-Eifel                  | 11%      | 21%      | 2%       | 0       | 2%  |
| Germany-Harz                   | 1%       | 32%      | 6%       | 0       | 1%  |
| Germany-Hunsrück               | 0%       | 10%      | 0%       | 0       | 0%  |
| Germany-Schwarzwald            | 0%       | 35%      | 8%       | 0       | 0%  |
| Germany-Siegerland             | 5%       | 3%       | 1%       | 0       | 1%  |
| Greece-Antiparos               | 0%       | 0%       | 0%       | 0       | 0%  |
| Greece-Chalkidiki              | 0%       | 13%      | 0%       | 0       | 0%  |
| Greece-Kea                     | 0%       | 0%       | 0%       | 0       | 0%  |
| Greece-Laurion                 | 0%       | 12%      | 0%       | 0       | 0%  |
| Greece-Seriphos                | 0%       | 0%       | 0%       | 0       | 0%  |
| Greece-Siphnos                 | 0%       | 1%       | 0%       | 0       | 0%  |
| Greece-Syros                   | 0%       | 1%       | 0%       | 0       | 0%  |
| Greece-Thasos                  | 0%       | 14%      | 0%       | 0       | 0%  |
| Greece-Thera                   | 0%       | 1%       | 0%       | 0       | 0%  |
| Iran-CentrallIran              | 0%       | 44%      | 1%       | 0       | 0%  |
| Italy-Sardinia-Iglesiente      | 0%       | 37%      | 0%       | 0       | 0%  |
| Italy-Sardinia-Iglesiente      | 0%       | 19%      | 0%       | 0       | 0%  |
| Italy-Tuscany-MassaMarittima   | 9%       | 20%      | 6%       | 1       | 6%  |
| Portugal                       | 0%       | 0%       | 0%       | 0       | 0%  |
| SaudiArabia                    | 0%       | 0%       | 0%       | 0       | 0%  |
| Spain-Almeria                  | 5%       | 5%       | 3%       | 0       | 3%  |
| Spain-Badajoz                  | 0%       | 5%       | 1%       | 0       | 0%  |
| Spain-Baleares                 | 2%       | 0%       | 7%       | 0       | 0%  |
| Spain-Ciudad Real              | 0%       | 20%      | 1%       | 0       | 0%  |
| Spain-Córdoba                  | 0%       | 14%      | 0%       | 0       | 0%  |
| Spain-Gipuzkoa                 | 0%       | 9%       | 0%       | 0       | 0%  |
| Spain-Huelva                   | 0%       | 33%      | 0%       | 0       | 0%  |
| Spain-Jaén                     | 2%       | 17%      | 1%       | 0       | 1%  |
| Spain-Murcia                   | 0%       | 2%       | 0%       | 0       | 0%  |
| Spain-Tarragona                | 7%       | 0%       | 9%       | 0       | 0%  |
| Turkey-Central                 | 0%       | 9%       | 0%       | 0       | 0%  |
| Turkey-CentralTaurusRegion     | 0%       | 0%       | 0%       | 0       | 0%  |
| Turkey-East                    | 1%       | 14%      | 2%       | 0       | 1%  |
| Turkey-West                    | 0%       | 5%       | 0%       | 0       | 0%  |

MS053

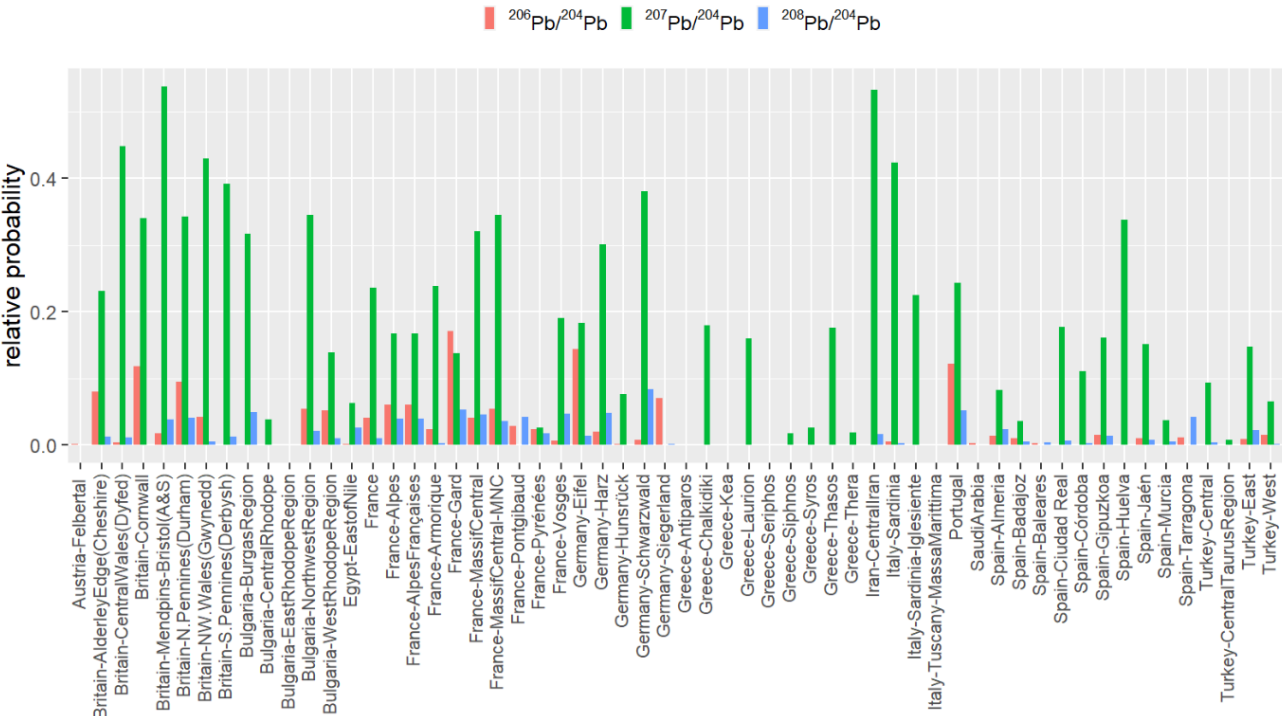

| Mining_Region                  | prob_206 | prob_207 | prob_208 | min>5%? | min |
|--------------------------------|----------|----------|----------|---------|-----|
| Austria-Felbertal              | 0%       | 0%       | 0%       | 0       | 0%  |
| Britain-AlderleyEdge(Cheshire) | 8%       | 23%      | 1%       | 0       | 1%  |
| Britain-CentralWales(Dyfed)    | 0%       | 45%      | 1%       | 0       | 0%  |
| Britain-Cornwall               | 12%      | 34%      | 0%       | 0       | 0%  |
| Britain-Mendpins-Bristol(A&S)  | 2%       | 54%      | 4%       | 0       | 2%  |
| Britain-N.Pennines(Durham)     | 10%      | 34%      | 4%       | 0       | 4%  |
| Britain-NW.Wales(Gwynedd)      | 4%       | 43%      | 0%       | 0       | 0%  |
| Britain-S.Pennines(Derbysh)    | 0%       | 39%      | 1%       | 0       | 0%  |
| Bulgaria-BurgasRegion          | 0%       | 32%      | 5%       | 0       | 0%  |
| Bulgaria-CentralRhodope        | 0%       | 4%       | 0%       | 0       | 0%  |
| Bulgaria-EastRhodopeRegion     | 0%       | 0%       | 0%       | 0       | 0%  |
| Bulgaria-NorthwestRegion       | 5%       | 35%      | 2%       | 0       | 2%  |
| Bulgaria-WestRhodopeRegion     | 5%       | 14%      | 1%       | 0       | 1%  |
| Egypt-EastofNile               | 0%       | 6%       | 3%       | 0       | 0%  |
| France                         | 4%       | 24%      | 1%       | 0       | 1%  |
| France-Alpes                   | 6%       | 17%      | 4%       | 0       | 4%  |
| France-AlpesFrançaises         | 6%       | 17%      | 4%       | 0       | 4%  |
| France-Armorique               | 2%       | 24%      | 0%       | 0       | 0%  |
| France-Gard                    | 17%      | 14%      | 5%       | 1       | 5%  |
| France-MassifCentral           | 4%       | 32%      | 5%       | 0       | 4%  |
| France-MassifCentral-MNC       | 5%       | 35%      | 4%       | 0       | 4%  |
| France-Pontgibaud              | 3%       | 0%       | 4%       | 0       | 0%  |
| France-Pyrénées                | 2%       | 3%       | 2%       | 0       | 2%  |
| France-Vosges                  | 1%       | 19%      | 5%       | 0       | 1%  |
| Germany-Eifel                  | 14%      | 18%      | 1%       | 0       | 1%  |
| Germany-Harz                   | 2%       | 30%      | 5%       | 0       | 2%  |
| Germany-Hunsrück               | 0%       | 8%       | 0%       | 0       | 0%  |
| Germany-Schwarzwald            | 1%       | 38%      | 8%       | 0       | 1%  |
| Germany-Siegerland             | 7%       | 0%       | 0%       | 0       | 0%  |
| Greece-Antiparos               | 0%       | 0%       | 0%       | 0       | 0%  |
| Greece-Chalkidiki              | 0%       | 18%      | 0%       | 0       | 0%  |
| Greece-Kea                     | 0%       | 0%       | 0%       | 0       | 0%  |
| Greece-Laurion                 | 0%       | 16%      | 0%       | 0       | 0%  |
| Greece-Seriphos                | 0%       | 0%       | 0%       | 0       | 0%  |
| Greece-Siphnos                 | 0%       | 2%       | 0%       | 0       | 0%  |
| Greece-Syros                   | 0%       | 3%       | 0%       | 0       | 0%  |
| Greece-Thasos                  | 0%       | 18%      | 0%       | 0       | 0%  |
| Greece-Thera                   | 0%       | 2%       | 0%       | 0       | 0%  |
| Iran-Centrallran               | 0%       | 53%      | 2%       | 0       | 0%  |
| Italy-Sardinia                 | 0%       | 42%      | 0%       | 0       | 0%  |
| Italy-Sardinia-Iglesiente      | 0%       | 23%      | 0%       | 0       | 0%  |
| Italy-Tuscany-MassaMarittima   | 0%       | 0%       | 0%       | 0       | 0%  |
| Portugal                       | 12%      | 24%      | 5%       | 1       | 5%  |
| SaudiArabia                    | 0%       | 0%       | 0%       | 0       | 0%  |
| Spain-Almeria                  | 1%       | 8%       | 2%       | 0       | 1%  |
| Spain-Badajoz                  | 1%       | 4%       | 0%       | 0       | 0%  |
| Spain-Baleares                 | 0%       | 0%       | 0%       | 0       | 0%  |
| Spain-Ciudad Real              | 0%       | 18%      | 1%       | 0       | 0%  |
| Spain-Córdoba                  | 0%       | 11%      | 0%       | 0       | 0%  |
| Spain-Gipuzkoa                 | 2%       | 16%      | 1%       | 0       | 1%  |
| Spain-Huelva                   | 0%       | 34%      | 0%       | 0       | 0%  |
| Spain-Jaén                     | 1%       | 15%      | 1%       | 0       | 1%  |
| Spain-Murcia                   | 0%       | 4%       | 1%       | 0       | 0%  |
| Spain-Tarragona                | 1%       | 0%       | 4%       | 0       | 0%  |
| Turkey-Central                 | 0%       | 9%       | 0%       | 0       | 0%  |
| Turkey-CentralTaurusRegion     | 0%       | 1%       | 0%       | 0       | 0%  |
| Turkey-East                    | 1%       | 15%      | 2%       | 0       | 1%  |
| Turkey-West                    | 1%       | 7%       | 0%       | 0       | 0%  |



MS060

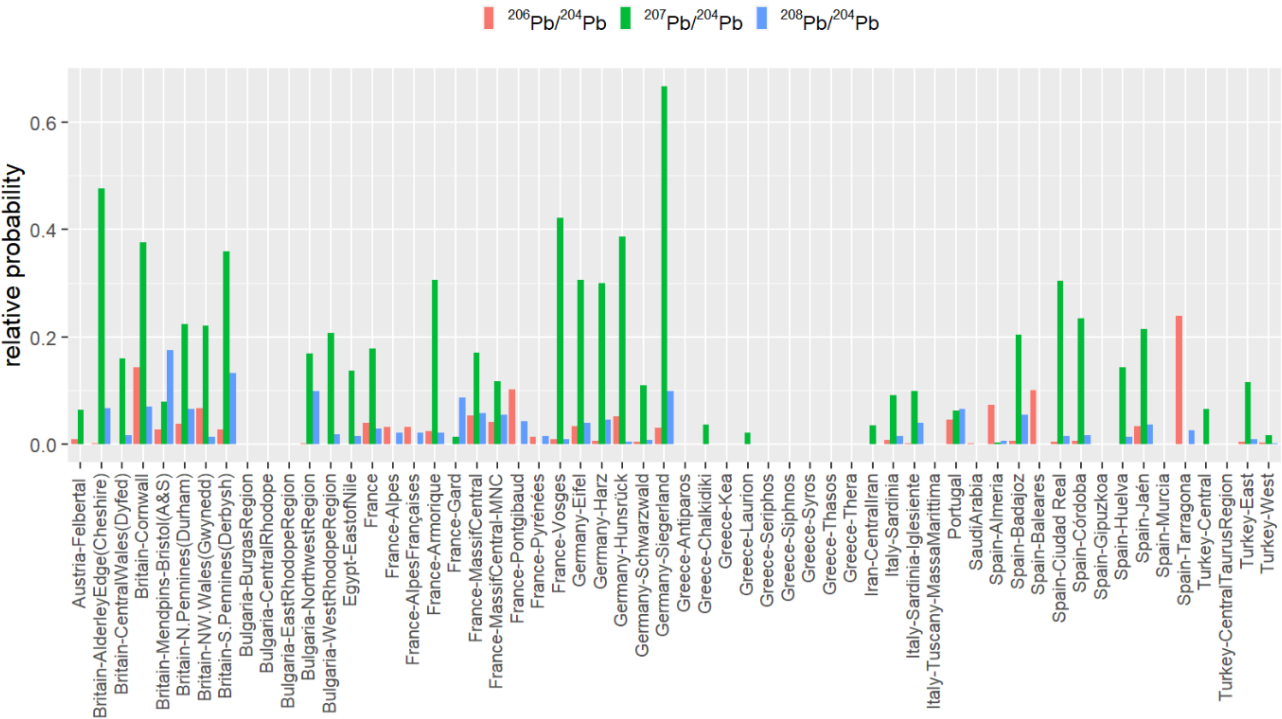

| Mining_Region                  | prob_206 | prob_207 | prob_208 | min>5%? | min |
|--------------------------------|----------|----------|----------|---------|-----|
| Austria-Felbertal              | 1%       | 6%       | 0%       | 0       | 0%  |
| Britain-AlderleyEdge(Cheshire) | 0%       | 48%      | 7%       | 0       | 0%  |
| Britain-CentralWales(Dyfed)    | 0%       | 16%      | 2%       | 0       | 0%  |
| Britain-Cornwall               | 14%      | 38%      | 7%       | 1       | 7%  |
| Britain-Mendpins-Bristol(A&S)  | 3%       | 8%       | 18%      | 0       | 3%  |
| Britain-N.Pennines(Durham)     | 4%       | 22%      | 7%       | 0       | 4%  |
| Britain-NW.Wales(Gwynedd)      | 7%       | 22%      | 1%       | 0       | 1%  |
| Britain-S.Pennines(Derbysh)    | 3%       | 36%      | 13%      | 0       | 3%  |
| Bulgaria-BurgasRegion          | 0%       | 0%       | 0%       | 0       | 0%  |
| Bulgaria-CentralRhodope        | 0%       | 0%       | 0%       | 0       | 0%  |
| Bulgaria-EastRhodopeRegion     | 0%       | 0%       | 0%       | 0       | 0%  |
| Bulgaria-NorthwestRegion       | 0%       | 17%      | 10%      | 0       | 0%  |
| Bulgaria-WestRhodopeRegion     | 0%       | 21%      | 2%       | 0       | 0%  |
| Egypt-EastofNile               | 0%       | 14%      | 2%       | 0       | 0%  |
| France                         | 4%       | 18%      | 3%       | 0       | 3%  |
| France-Alpes                   | 3%       | 0%       | 2%       | 0       | 0%  |
| France-AlpesFrançaises         | 3%       | 0%       | 2%       | 0       | 0%  |
| France-Armorique               | 2%       | 31%      | 2%       | 0       | 2%  |
| France-Gard                    | 0%       | 1%       | 9%       | 0       | 0%  |
| France-MassifCentral           | 5%       | 17%      | 6%       | 1       | 5%  |
| France-MassifCentral-MNC       | 4%       | 12%      | 6%       | 0       | 4%  |
| France-Pontgibaud              | 10%      | 0%       | 4%       | 0       | 0%  |
| France-Pyrénées                | 1%       | 0%       | 2%       | 0       | 0%  |
| France-Vosges                  | 1%       | 42%      | 1%       | 0       | 1%  |
| Germany-Eifel                  | 3%       | 31%      | 4%       | 0       | 3%  |
| Germany-Harz                   | 1%       | 30%      | 5%       | 0       | 1%  |
| Germany-Hunsrück               | 5%       | 39%      | 1%       | 0       | 1%  |
| Germany-Schwarzwald            | 0%       | 11%      | 1%       | 0       | 0%  |
| Germany-Siegerland             | 3%       | 67%      | 10%      | 0       | 3%  |
| Greece-Antiparos               | 0%       | 0%       | 0%       | 0       | 0%  |
| Greece-Chalkidiki              | 0%       | 4%       | 0%       | 0       | 0%  |
| Greece-Kea                     | 0%       | 0%       | 0%       | 0       | 0%  |
| Greece-Laurion                 | 0%       | 2%       | 0%       | 0       | 0%  |
| Greece-Seriphos                | 0%       | 0%       | 0%       | 0       | 0%  |
| Greece-Siphnos                 | 0%       | 0%       | 0%       | 0       | 0%  |
| Greece-Thasos                  | 0%       | 0%       | 0%       | 0       | 0%  |
| Greece-Thera                   | 0%       | 0%       | 0%       | 0       | 0%  |
| Iran-Centrallran               | 0%       | 4%       | 0%       | 0       | 0%  |
| Italy-Sardinia                 | 1%       | 9%       | 1%       | 0       | 1%  |
| Italy-Sardinia-Iglesiente      | 0%       | 10%      | 4%       | 0       | 0%  |
| Italy-Tuscany-MassaMarittima   | 0%       | 0%       | 0%       | 0       | 0%  |
| Portugal                       | 5%       | 6%       | 7%       | 0       | 5%  |
| SaudiArabia                    | 0%       | 0%       | 0%       | 0       | 0%  |
| Spain-Almeria                  | 7%       | 0%       | 1%       | 0       | 0%  |
| Spain-Badajoz                  | 1%       | 20%      | 5%       | 0       | 1%  |
| Spain-Baleares                 | 10%      | 0%       | 0%       | 0       | 0%  |
| Spain-Ciudad Real              | 1%       | 30%      | 2%       | 0       | 1%  |
| Spain-Córdoba                  | 1%       | 23%      | 2%       | 0       | 1%  |
| Spain-Gipuzkoa                 | 0%       | 0%       | 0%       | 0       | 0%  |
| Spain-Huelva                   | 0%       | 14%      | 1%       | 0       | 0%  |
| Spain-Jaén                     | 3%       | 21%      | 4%       | 0       | 3%  |
| Spain-Murcia                   | 0%       | 0%       | 0%       | 0       | 0%  |
| Spain-Tarragona                | 24%      | 0%       | 3%       | 0       | 0%  |
| Turkey-Central                 | 0%       | 7%       | 0%       | 0       | 0%  |
| Turkey-CentralTaurusRegion     | 0%       | 0%       | 0%       | 0       | 0%  |
| Turkey-East                    | 0%       | 12%      | 1%       | 0       | 0%  |
| Turkey-West                    | 0%       | 2%       | 0%       | 0       | 0%  |

MS061

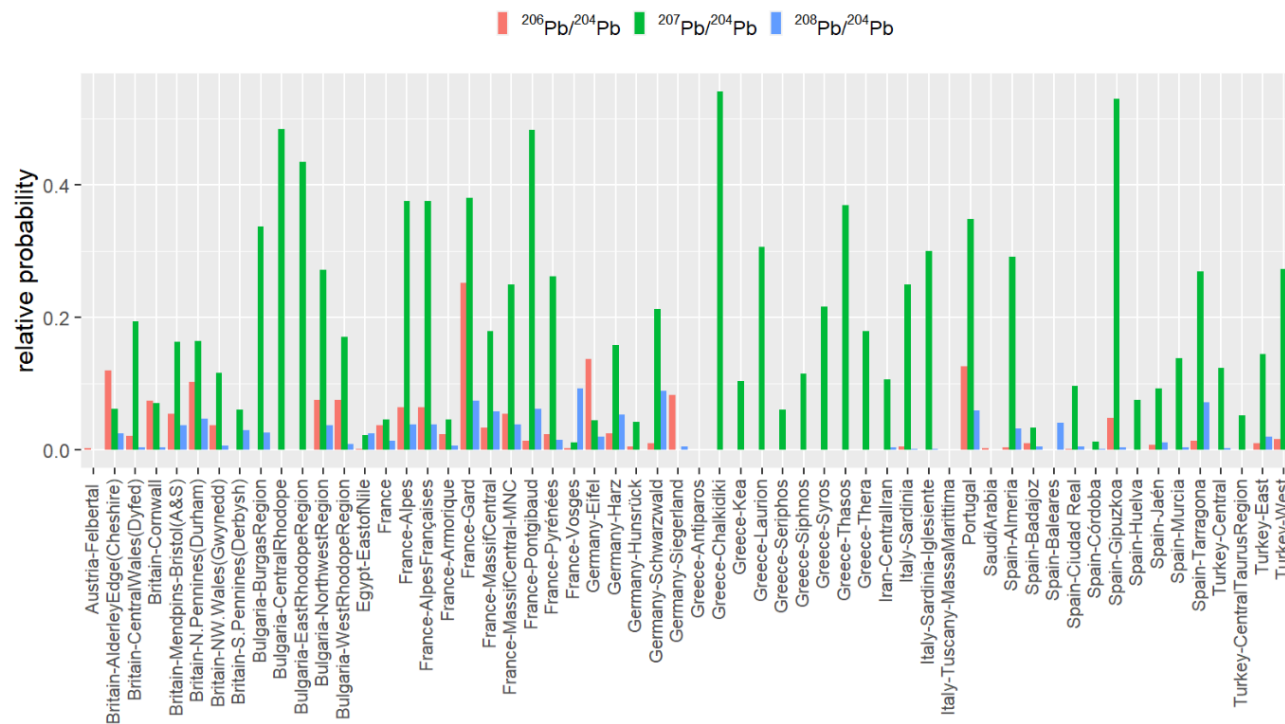

| Mining_Region                  | prob_206 | prob_207 | prob_208 | min>5%? | min |
|--------------------------------|----------|----------|----------|---------|-----|
| Austria-Felbertal              | 0%       | 0%       | 0%       | 0       | 0%  |
| Britain-AlderleyEdge(Cheshire) | 12%      | 6%       | 2%       | 0       | 2%  |
| Britain-CentralWales(Dyfed)    | 2%       | 19%      | 0%       | 0       | 0%  |
| Britain-Cornwall               | 7%       | 7%       | 0%       | 0       | 0%  |
| Britain-Mendips-Bristol(A&S)   | 5%       | 16%      | 4%       | 0       | 4%  |
| Britain-N.Pennines(Durham)     | 10%      | 16%      | 5%       | 0       | 5%  |
| Britain-NW.Wales(Gwynedd)      | 4%       | 12%      | 1%       | 0       | 1%  |
| Britain-S.Pennines(Derbysh)    | 0%       | 6%       | 3%       | 0       | 0%  |
| Bulgaria-BurgasRegion          | 0%       | 34%      | 3%       | 0       | 0%  |
| Bulgaria-CentralRhodope        | 0%       | 48%      | 0%       | 0       | 0%  |
| Bulgaria-EastRhodopeRegion     | 0%       | 44%      | 0%       | 0       | 0%  |
| Bulgaria-NorthwestRegion       | 7%       | 27%      | 4%       | 0       | 4%  |
| Bulgaria-WestRhodopeRegion     | 8%       | 17%      | 1%       | 0       | 1%  |
| Egypt-EastofNile               | 0%       | 2%       | 2%       | 0       | 0%  |
| France                         | 4%       | 5%       | 1%       | 0       | 1%  |
| France-Alpes                   | 6%       | 38%      | 4%       | 0       | 4%  |
| France-AlpesFrançaises         | 6%       | 38%      | 4%       | 0       | 4%  |
| France-Armorique               | 2%       | 5%       | 1%       | 0       | 1%  |
| France-Gard                    | 25%      | 38%      | 7%       | 1       | 7%  |
| France-MassifCentral           | 3%       | 18%      | 6%       | 0       | 3%  |
| France-MassifCentral-MNC       | 5%       | 25%      | 4%       | 0       | 4%  |
| France-Pontgibaud              | 1%       | 48%      | 6%       | 0       | 1%  |
| France-Pyrénées                | 2%       | 26%      | 2%       | 0       | 2%  |
| France-Vosges                  | 0%       | 1%       | 9%       | 0       | 0%  |
| Germany-Eifel                  | 14%      | 4%       | 2%       | 0       | 2%  |
| Germany-Harz                   | 2%       | 16%      | 5%       | 0       | 2%  |
| Germany-Hunsrück               | 0%       | 4%       | 0%       | 0       | 0%  |
| Germany-Schwarzwald            | 1%       | 21%      | 9%       | 0       | 1%  |
| Germany-Siegerland             | 8%       | 0%       | 1%       | 0       | 0%  |
| Greece-Antiparos               | 0%       | 0%       | 0%       | 0       | 0%  |
| Greece-Chalkidiki              | 0%       | 54%      | 0%       | 0       | 0%  |
| Greece-Kea                     | 0%       | 10%      | 0%       | 0       | 0%  |
| Greece-Laurion                 | 0%       | 31%      | 0%       | 0       | 0%  |
| Greece-Seriphos                | 0%       | 6%       | 0%       | 0       | 0%  |
| Greece-Siphos                  | 0%       | 11%      | 0%       | 0       | 0%  |
| Greece-Syros                   | 0%       | 22%      | 0%       | 0       | 0%  |
| Greece-Thasos                  | 0%       | 37%      | 0%       | 0       | 0%  |
| Greece-Thera                   | 0%       | 18%      | 0%       | 0       | 0%  |
| Iran-Centrallran               | 0%       | 11%      | 0%       | 0       | 0%  |
| Italy-Sardinia                 | 1%       | 25%      | 0%       | 0       | 0%  |
| Italy-Sardinia-Iglesiente      | 0%       | 30%      | 0%       | 0       | 0%  |
| Italy-Tuscany-MassaMarittima   | 0%       | 0%       | 0%       | 0       | 0%  |
| Portugal                       | 13%      | 35%      | 6%       | 1       | 6%  |
| SaudiArabia                    | 0%       | 0%       | 0%       | 0       | 0%  |
| Spain-Almeria                  | 0%       | 29%      | 3%       | 0       | 0%  |
| Spain-Badajoz                  | 1%       | 3%       | 1%       | 0       | 1%  |
| Spain-Baleares                 | 0%       | 0%       | 4%       | 0       | 0%  |
| Spain-Ciudad Real              | 0%       | 10%      | 1%       | 0       | 0%  |
| Spain-Córdoba                  | 0%       | 1%       | 0%       | 0       | 0%  |
| Spain-Gipuzkoa                 | 5%       | 53%      | 0%       | 0       | 0%  |
| Spain-Huelva                   | 0%       | 8%       | 0%       | 0       | 0%  |
| Spain-Jaén                     | 1%       | 9%       | 1%       | 0       | 1%  |
| Spain-Murcia                   | 0%       | 14%      | 0%       | 0       | 0%  |
| Spain-Tarragona                | 1%       | 27%      | 7%       | 0       | 1%  |
| Turkey-Central                 | 0%       | 12%      | 0%       | 0       | 0%  |
| Turkey-CentralTaurusRegion     | 0%       | 5%       | 0%       | 0       | 0%  |
| Turkey-East                    | 1%       | 14%      | 2%       | 0       | 1%  |
| Turkey-West                    | 2%       | 27%      | 0%       | 0       | 0%  |

Group3: Greece

23-Denarius-30-1

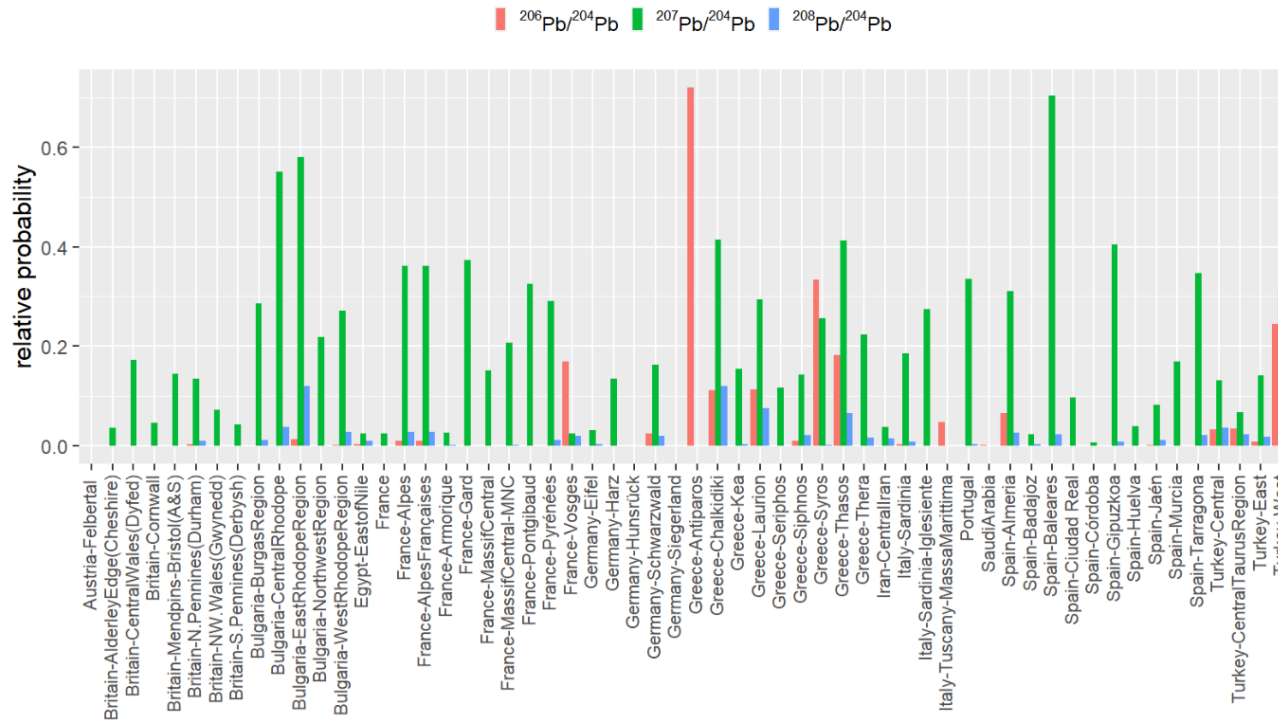

| Mining_Region                  | prob_206 | prob_207 | prob_208 | min>5%? | min |
|--------------------------------|----------|----------|----------|---------|-----|
| Austria-Felbertal              | 0%       | 0%       | 0%       |         | 0   |
| Britain-AlderleyEdge(Cheshire) | 0%       | 4%       | 0%       |         | 0   |
| Britain-CentralWales(Dyfed)    | 0%       | 17%      | 0%       |         | 0   |
| Britain-Cornwall               | 0%       | 5%       | 0%       |         | 0   |
| Britain-Mendpins-Bristol(A&S)  | 0%       | 14%      | 0%       |         | 0   |
| Britain-N.Pennines(Durham)     | 0%       | 14%      | 1%       |         | 0   |
| Britain-NW.Wales(Gwynedd)      | 0%       | 7%       | 0%       |         | 0   |
| Britain-S.Pennines(Derbysh)    | 0%       | 4%       | 0%       |         | 0   |
| Bulgaria-BurgasRegion          | 0%       | 29%      | 1%       |         | 0   |
| Bulgaria-CentralRhodope        | 0%       | 55%      | 4%       |         | 0   |
| Bulgaria-EastRhodopeRegion     | 1%       | 58%      | 12%      |         | 0   |
| Bulgaria-NorthwestRegion       | 0%       | 22%      | 0%       |         | 0   |
| Bulgaria-WestRhodopeRegion     | 0%       | 27%      | 3%       |         | 0   |
| Egypt-EastofNile               | 0%       | 2%       | 1%       |         | 0   |
| France                         | 0%       | 2%       | 0%       |         | 0   |
| France-Alpes                   | 1%       | 36%      | 3%       |         | 0   |
| France-AlpesFrançaises         | 1%       | 36%      | 3%       |         | 0   |
| France-Armorique               | 0%       | 3%       | 0%       |         | 0   |
| France-Gard                    | 0%       | 37%      | 0%       |         | 0   |
| France-MassifCentral           | 0%       | 15%      | 0%       |         | 0   |
| France-MassifCentral-MNC       | 0%       | 21%      | 0%       |         | 0   |
| France-Pontgibaud              | 0%       | 33%      | 0%       |         | 0   |
| France-Pyrénées                | 0%       | 29%      | 1%       |         | 0   |
| France-Vosges                  | 17%      | 3%       | 2%       |         | 0   |
| Germany-Eifel                  | 0%       | 3%       | 0%       |         | 0   |
| Germany-Harz                   | 0%       | 13%      | 0%       |         | 0   |
| Germany-Hunsrück               | 0%       | 0%       | 0%       |         | 0   |
| Germany-Schwarzwald            | 3%       | 16%      | 2%       |         | 0   |
| Germany-Siegerland             | 0%       | 0%       | 0%       |         | 0   |
| Greece-Antiparos               | 72%      | 0%       | 0%       |         | 0   |
| Greece-Chalkidiki              | 11%      | 41%      | 12%      |         | 1   |
| Greece-Kea                     | 0%       | 15%      | 0%       |         | 0   |
| Greece-Laurion                 | 11%      | 29%      | 8%       |         | 1   |
| Greece-Seriphos                | 0%       | 12%      | 0%       |         | 0   |
| Greece-Siphnos                 | 1%       | 14%      | 2%       |         | 0   |
| Greece-Syros                   | 33%      | 26%      | 0%       |         | 0   |
| Greece-Thasos                  | 18%      | 41%      | 7%       |         | 1   |
| Greece-Thera                   | 0%       | 22%      | 2%       |         | 0   |
| Iran-CentralIran               | 0%       | 4%       | 2%       |         | 0   |
| Italy-Sardinia                 | 0%       | 19%      | 1%       |         | 0   |
| Italy-Sardinia-Iglesiente      | 0%       | 28%      | 0%       |         | 0   |
| Italy-Tuscany-MassaMarittima   | 5%       | 0%       | 0%       |         | 0   |
| Portugal                       | 0%       | 33%      | 0%       |         | 0   |
| SaudiArabia                    | 0%       | 0%       | 0%       |         | 0   |
| Spain-Almería                  | 7%       | 31%      | 3%       |         | 0   |
| Spain-Badajoz                  | 0%       | 2%       | 0%       |         | 0   |
| Spain-Baleares                 | 0%       | 70%      | 2%       |         | 0   |
| Spain-Ciudad Real              | 0%       | 10%      | 0%       |         | 0   |
| Spain-Córdoba                  | 0%       | 1%       | 0%       |         | 0   |
| Spain-Gipuzkoa                 | 0%       | 40%      | 1%       |         | 0   |
| Spain-Huelva                   | 0%       | 4%       | 0%       |         | 0   |
| Spain-Jaén                     | 0%       | 8%       | 1%       |         | 0   |
| Spain-Murcia                   | 0%       | 17%      | 0%       |         | 0   |
| Spain-Tarragona                | 0%       | 35%      | 2%       |         | 0   |
| Turkey-Central                 | 3%       | 13%      | 4%       |         | 0   |
| Turkey-CentralTaurusRegion     | 3%       | 7%       | 2%       |         | 0   |
| Turkey-East                    | 1%       | 14%      | 2%       |         | 0   |
| Turkey-West                    | 24%      | 32%      | 6%       |         | 1   |

MS002

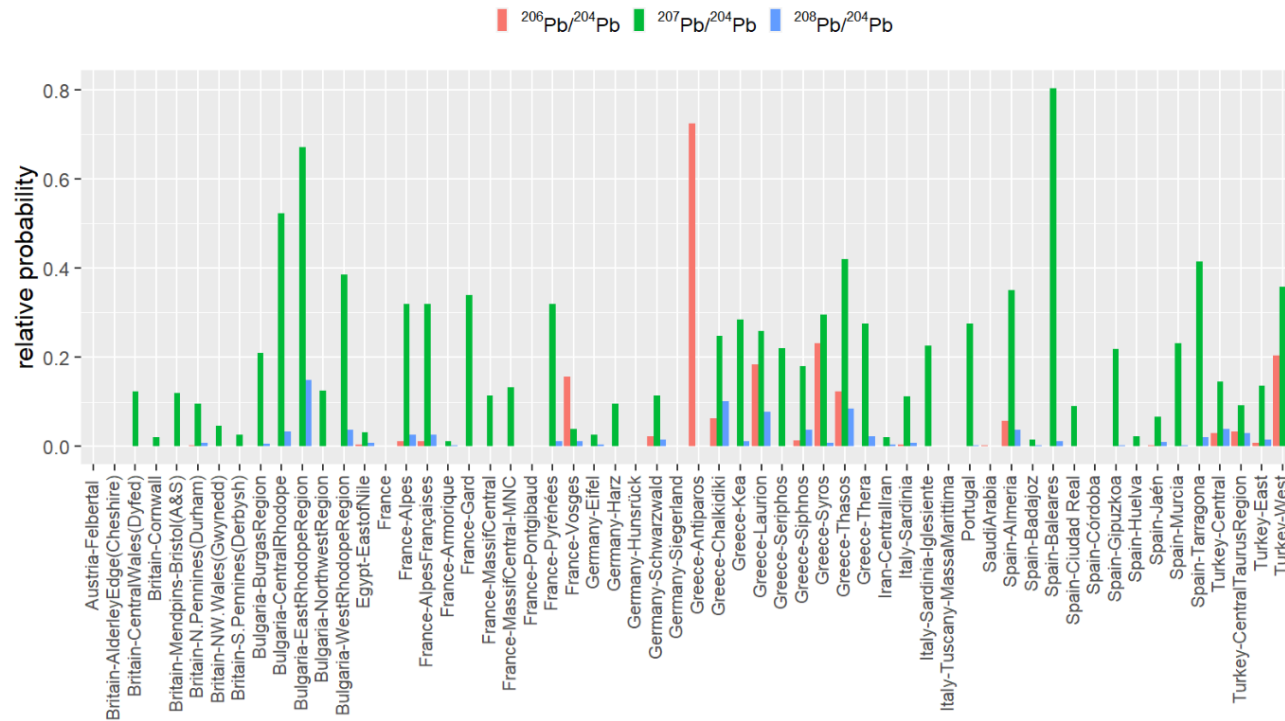

| Mining_Region                  | prob_206 | prob_207 | prob_208 | min>5%? | min |
|--------------------------------|----------|----------|----------|---------|-----|
| Austria-Felbertal              | 0%       | 0%       | 0%       | 0       | 0%  |
| Britain-AlderleyEdge(Cheshire) | 0%       | 0%       | 0%       | 0       | 0%  |
| Britain-CentralWales(Dyfed)    | 0%       | 12%      | 0%       | 0       | 0%  |
| Britain-Cornwall               | 0%       | 2%       | 0%       | 0       | 0%  |
| Britain-Mendips-Bristol(A&S)   | 0%       | 12%      | 0%       | 0       | 0%  |
| Britain-N.Pennines(Durham)     | 0%       | 10%      | 1%       | 0       | 0%  |
| Britain-NW.Wales(Gwynedd)      | 0%       | 5%       | 0%       | 0       | 0%  |
| Britain-S.Pennines(Derbysh)    | 0%       | 3%       | 0%       | 0       | 0%  |
| Bulgaria-BurgasRegion          | 0%       | 21%      | 1%       | 0       | 0%  |
| Bulgaria-CentralRhodope        | 0%       | 52%      | 3%       | 0       | 0%  |
| Bulgaria-EastRhodopeRegion     | 0%       | 67%      | 15%      | 0       | 0%  |
| Bulgaria-NorthwestRegion       | 0%       | 13%      | 0%       | 0       | 0%  |
| Bulgaria-WestRhodopeRegion     | 0%       | 39%      | 4%       | 0       | 0%  |
| Egypt-EastofNile               | 0%       | 3%       | 1%       | 0       | 0%  |
| France                         | 0%       | 0%       | 0%       | 0       | 0%  |
| France-Alpes                   | 1%       | 32%      | 3%       | 0       | 1%  |
| France-AlpesFrançaises         | 1%       | 32%      | 3%       | 0       | 1%  |
| France-Armorique               | 0%       | 1%       | 0%       | 0       | 0%  |
| France-Gard                    | 0%       | 34%      | 0%       | 0       | 0%  |
| France-MassifCentral           | 0%       | 11%      | 0%       | 0       | 0%  |
| France-MassifCentral-MNC       | 0%       | 13%      | 0%       | 0       | 0%  |
| France-Pontgibaud              | 0%       | 0%       | 0%       | 0       | 0%  |
| France-Pyrénées                | 0%       | 32%      | 1%       | 0       | 0%  |
| France-Vosges                  | 16%      | 4%       | 1%       | 0       | 1%  |
| Germany-Eifel                  | 0%       | 3%       | 0%       | 0       | 0%  |
| Germany-Harz                   | 0%       | 10%      | 0%       | 0       | 0%  |
| Germany-Hunsrück               | 0%       | 0%       | 0%       | 0       | 0%  |
| Germany-Schwarzwald            | 2%       | 11%      | 1%       | 0       | 1%  |
| Germany-Siegerland             | 0%       | 0%       | 0%       | 0       | 0%  |
| Greece-Antiparos               | 72%      | 0%       | 0%       | 0       | 0%  |
| Greece-Chalkidiki              | 6%       | 25%      | 10%      | 1       | 6%  |
| Greece-Kea                     | 0%       | 28%      | 1%       | 0       | 0%  |
| Greece-Laurion                 | 18%      | 26%      | 8%       | 1       | 8%  |
| Greece-Seriphos                | 0%       | 22%      | 0%       | 0       | 0%  |
| Greece-Siphnos                 | 1%       | 18%      | 4%       | 0       | 1%  |
| Greece-Syros                   | 23%      | 30%      | 1%       | 0       | 1%  |
| Greece-Thasos                  | 12%      | 42%      | 8%       | 1       | 8%  |
| Greece-Thera                   | 0%       | 27%      | 2%       | 0       | 0%  |
| Iran-Centrallran               | 0%       | 2%       | 0%       | 0       | 0%  |
| Italy-Sardinia                 | 0%       | 11%      | 1%       | 0       | 0%  |
| Italy-Sardinia-Iglesiente      | 0%       | 22%      | 0%       | 0       | 0%  |
| Italy-Tuscany-MassaMarittima   | 0%       | 0%       | 0%       | 0       | 0%  |
| Portugal                       | 0%       | 28%      | 0%       | 0       | 0%  |
| SaudiArabia                    | 0%       | 0%       | 0%       | 0       | 0%  |
| Spain-Almeria                  | 6%       | 35%      | 4%       | 0       | 4%  |
| Spain-Badajoz                  | 0%       | 1%       | 0%       | 0       | 0%  |
| Spain-Baleares                 | 0%       | 80%      | 1%       | 0       | 0%  |
| Spain-Ciudad Real              | 0%       | 9%       | 0%       | 0       | 0%  |
| Spain-Córdoba                  | 0%       | 0%       | 0%       | 0       | 0%  |
| Spain-Gipuzkoa                 | 0%       | 22%      | 0%       | 0       | 0%  |
| Spain-Huelva                   | 0%       | 2%       | 0%       | 0       | 0%  |
| Spain-Jaén                     | 0%       | 7%       | 1%       | 0       | 0%  |
| Spain-Murcia                   | 0%       | 23%      | 0%       | 0       | 0%  |
| Spain-Tarragona                | 0%       | 41%      | 2%       | 0       | 0%  |
| Turkey-Central                 | 3%       | 14%      | 4%       | 0       | 3%  |
| Turkey-CentralTaurusRegion     | 3%       | 9%       | 3%       | 0       | 3%  |
| Turkey-East                    | 1%       | 14%      | 2%       | 0       | 1%  |
| Turkey-West                    | 20%      | 36%      | 7%       | 1       | 7%  |

MS005

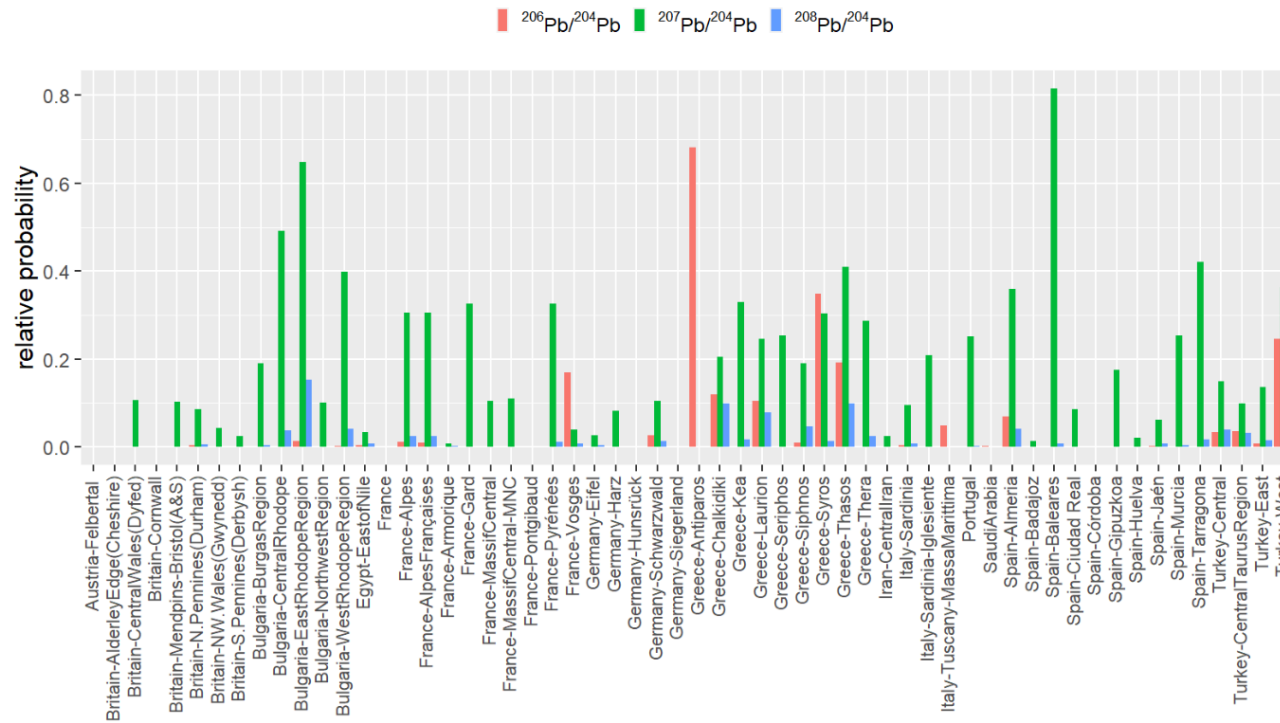

| Mining_Region                  | prob_206 | prob_207 | prob_208 | min>5%? | min |
|--------------------------------|----------|----------|----------|---------|-----|
| Austria-Felbertal              | 0%       | 0%       | 0%       | 0       | 0%  |
| Britain-AlderleyEdge(Cheshire) | 0%       | 0%       | 0%       | 0       | 0%  |
| Britain-CentralWales(Dyfed)    | 0%       | 11%      | 0%       | 0       | 0%  |
| Britain-Cornwall               | 0%       | 0%       | 0%       | 0       | 0%  |
| Britain-Mendpins-Bristol(A&S)  | 0%       | 10%      | 0%       | 0       | 0%  |
| Britain-N.Pennines(Durham)     | 0%       | 9%       | 1%       | 0       | 0%  |
| Britain-NW.Wales(Gwynedd)      | 0%       | 4%       | 0%       | 0       | 0%  |
| Britain-S.Pennines(Derbysh)    | 0%       | 2%       | 0%       | 0       | 0%  |
| Bulgaria-BurgasRegion          | 0%       | 19%      | 0%       | 0       | 0%  |
| Bulgaria-CentralRhodope        | 0%       | 49%      | 4%       | 0       | 0%  |
| Bulgaria-EastRhodopeRegion     | 1%       | 65%      | 15%      | 0       | 1%  |
| Bulgaria-NorthwestRegion       | 0%       | 10%      | 0%       | 0       | 0%  |
| Bulgaria-WestRhodopeRegion     | 0%       | 40%      | 4%       | 0       | 0%  |
| Egypt-EastofNile               | 0%       | 3%       | 1%       | 0       | 0%  |
| France                         | 0%       | 0%       | 0%       | 0       | 0%  |
| France-Alpes                   | 1%       | 30%      | 3%       | 0       | 1%  |
| France-AlpesFrançaises         | 1%       | 30%      | 3%       | 0       | 1%  |
| France-Armorique               | 0%       | 1%       | 0%       | 0       | 0%  |
| France-Gard                    | 0%       | 33%      | 0%       | 0       | 0%  |
| France-MassifCentral           | 0%       | 10%      | 0%       | 0       | 0%  |
| France-MassifCentral-MNC       | 0%       | 11%      | 0%       | 0       | 0%  |
| France-Pontgibaud              | 0%       | 0%       | 0%       | 0       | 0%  |
| France-Pyrénées                | 0%       | 33%      | 1%       | 0       | 0%  |
| France-Vosges                  | 17%      | 4%       | 1%       | 0       | 1%  |
| Germany-Eifel                  | 0%       | 3%       | 0%       | 0       | 0%  |
| Germany-Harz                   | 0%       | 8%       | 0%       | 0       | 0%  |
| Germany-Hunsrück               | 0%       | 0%       | 0%       | 0       | 0%  |
| Germany-Schwarzwald            | 3%       | 10%      | 1%       | 0       | 1%  |
| Germany-Siegerland             | 0%       | 0%       | 0%       | 0       | 0%  |
| Greece-Antiparos               | 68%      | 0%       | 0%       | 0       | 0%  |
| Greece-Chalkidiki              | 12%      | 21%      | 10%      | 1       | 10% |
| Greece-Kea                     | 0%       | 33%      | 2%       | 0       | 0%  |
| Greece-Laurion                 | 10%      | 25%      | 8%       | 1       | 8%  |
| Greece-Seriphos                | 0%       | 25%      | 0%       | 0       | 0%  |
| Greece-Siphnos                 | 1%       | 19%      | 5%       | 0       | 1%  |
| Greece-Syros                   | 35%      | 30%      | 1%       | 0       | 1%  |
| Greece-Thasos                  | 19%      | 41%      | 10%      | 1       | 10% |
| Greece-Thera                   | 0%       | 29%      | 2%       | 0       | 0%  |
| Iran-Centrallran               | 0%       | 2%       | 0%       | 0       | 0%  |
| Italy-Sardinia                 | 0%       | 10%      | 1%       | 0       | 0%  |
| Italy-Sardinia-Iglesiente      | 0%       | 21%      | 0%       | 0       | 0%  |
| Italy-Tuscany-MassaMarittima   | 5%       | 0%       | 0%       | 0       | 0%  |
| Portugal                       | 0%       | 25%      | 0%       | 0       | 0%  |
| SaudiArabia                    | 0%       | 0%       | 0%       | 0       | 0%  |
| Spain-Almeria                  | 7%       | 36%      | 4%       | 0       | 4%  |
| Spain-Badajoz                  | 0%       | 1%       | 0%       | 0       | 0%  |
| Spain-Baleares                 | 0%       | 82%      | 1%       | 0       | 0%  |
| Spain-Ciudad Real              | 0%       | 9%       | 0%       | 0       | 0%  |
| Spain-Córdoba                  | 0%       | 0%       | 0%       | 0       | 0%  |
| Spain-Gipuzkoa                 | 0%       | 18%      | 0%       | 0       | 0%  |
| Spain-Huelva                   | 0%       | 2%       | 0%       | 0       | 0%  |
| Spain-Jaén                     | 0%       | 6%       | 1%       | 0       | 0%  |
| Spain-Murcia                   | 0%       | 25%      | 0%       | 0       | 0%  |
| Spain-Tarragona                | 0%       | 42%      | 2%       | 0       | 0%  |
| Turkey-Central                 | 3%       | 15%      | 4%       | 0       | 3%  |
| Turkey-CentralTaurusRegion     | 4%       | 10%      | 3%       | 0       | 3%  |
| Turkey-East                    | 1%       | 14%      | 1%       | 0       | 1%  |
| Turkey-West                    | 25%      | 36%      | 7%       | 1       | 7%  |



MS006

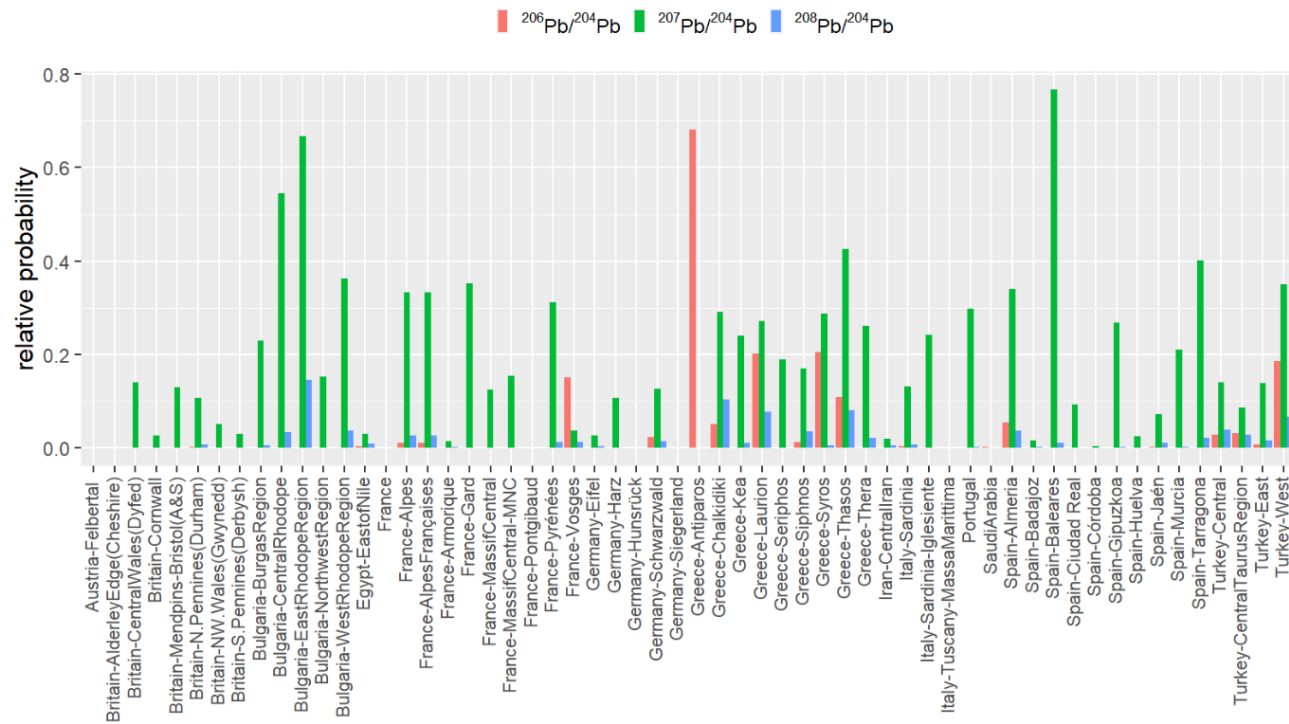

| Mining_Region                  | prob_206 | prob_207 | prob_208 | min>5%? | min |
|--------------------------------|----------|----------|----------|---------|-----|
| Austria-Felbertal              | 0%       | 0%       | 0%       |         | 0   |
| Britain-AlderleyEdge(Cheshire) | 0%       | 0%       | 0%       |         | 0   |
| Britain-CentralWales(Dyfed)    | 0%       | 14%      | 0%       |         | 0   |
| Britain-Cornwall               | 0%       | 3%       | 0%       |         | 0   |
| Britain-Mendips-Bristol(A&S)   | 0%       | 13%      | 0%       |         | 0   |
| Britain-N.Pennines(Durham)     | 0%       | 11%      | 1%       |         | 0   |
| Britain-NW.Wales(Gwynedd)      | 0%       | 5%       | 0%       |         | 0   |
| Britain-S.Pennines(Derbysh)    | 0%       | 3%       | 0%       |         | 0   |
| Bulgaria-BurgasRegion          | 0%       | 23%      | 1%       |         | 0   |
| Bulgaria-CentralRhodope        | 0%       | 54%      | 3%       |         | 0   |
| Bulgaria-EastRhodopeRegion     | 0%       | 67%      | 15%      |         | 0   |
| Bulgaria-NorthwestRegion       | 0%       | 15%      | 0%       |         | 0   |
| Bulgaria-WestRhodopeRegion     | 0%       | 36%      | 4%       |         | 0   |
| Egypt-EastofNile               | 0%       | 3%       | 1%       |         | 0   |
| France                         | 0%       | 0%       | 0%       |         | 0   |
| France-Alpes                   | 1%       | 33%      | 3%       |         | 0   |
| France-AlpesFrançaises         | 1%       | 33%      | 3%       |         | 0   |
| France-Armorique               | 0%       | 1%       | 0%       |         | 0   |
| France-Gard                    | 0%       | 35%      | 0%       |         | 0   |
| France-MassifCentral           | 0%       | 12%      | 0%       |         | 0   |
| France-MassifCentral-MNC       | 0%       | 15%      | 0%       |         | 0   |
| France-Pontgibaud              | 0%       | 0%       | 0%       |         | 0   |
| France-Pyrénées                | 0%       | 31%      | 1%       |         | 0   |
| France-Vosges                  | 15%      | 4%       | 1%       |         | 0   |
| Germany-Eifel                  | 0%       | 3%       | 0%       |         | 0   |
| Germany-Harz                   | 0%       | 11%      | 0%       |         | 0   |
| Germany-Hunsrück               | 0%       | 0%       | 0%       |         | 0   |
| Germany-Schwarzwald            | 2%       | 13%      | 1%       |         | 0   |
| Germany-Siegerland             | 0%       | 0%       | 0%       |         | 0   |
| Greece-Antiparos               | 68%      | 0%       | 0%       |         | 0   |
| Greece-Chalkidiki              | 5%       | 29%      | 10%      |         | 0   |
| Greece-Kea                     | 0%       | 24%      | 1%       |         | 0   |
| Greece-Laurion                 | 20%      | 27%      | 8%       |         | 0   |
| Greece-Seriphos                | 0%       | 19%      | 0%       |         | 0   |
| Greece-Siphos                  | 1%       | 17%      | 3%       |         | 0   |
| Greece-Syros                   | 20%      | 29%      | 1%       |         | 0   |
| Greece-Thasos                  | 11%      | 43%      | 8%       |         | 0   |
| Greece-Thera                   | 0%       | 26%      | 2%       |         | 0   |
| Iran-Centrallran               | 0%       | 2%       | 0%       |         | 0   |
| Italy-Sardinia                 | 0%       | 13%      | 1%       |         | 0   |
| Italy-Sardinia-Iglesiente      | 0%       | 24%      | 0%       |         | 0   |
| Italy-Tuscany-MassaMarittima   | 0%       | 0%       | 0%       |         | 0   |
| Portugal                       | 0%       | 30%      | 0%       |         | 0   |
| SaudiArabia                    | 0%       | 0%       | 0%       |         | 0   |
| Spain-Almeria                  | 5%       | 34%      | 4%       |         | 0   |
| Spain-Badajoz                  | 0%       | 2%       | 0%       |         | 0   |
| Spain-Baleares                 | 0%       | 77%      | 1%       |         | 0   |
| Spain-Ciudad Real              | 0%       | 9%       | 0%       |         | 0   |
| Spain-Córdoba                  | 0%       | 0%       | 0%       |         | 0   |
| Spain-Gipuzkoa                 | 0%       | 27%      | 0%       |         | 0   |
| Spain-Huelva                   | 0%       | 2%       | 0%       |         | 0   |
| Spain-Jaén                     | 0%       | 7%       | 1%       |         | 0   |
| Spain-Murcia                   | 0%       | 21%      | 0%       |         | 0   |
| Spain-Tarragona                | 0%       | 40%      | 2%       |         | 0   |
| Turkey-Central                 | 3%       | 14%      | 4%       |         | 0   |
| Turkey-CentralTaurusRegion     | 3%       | 9%       | 3%       |         | 0   |
| Turkey-East                    | 1%       | 14%      | 2%       |         | 0   |
| Turkey-West                    | 19%      | 35%      | 7%       |         | 0   |

MS057

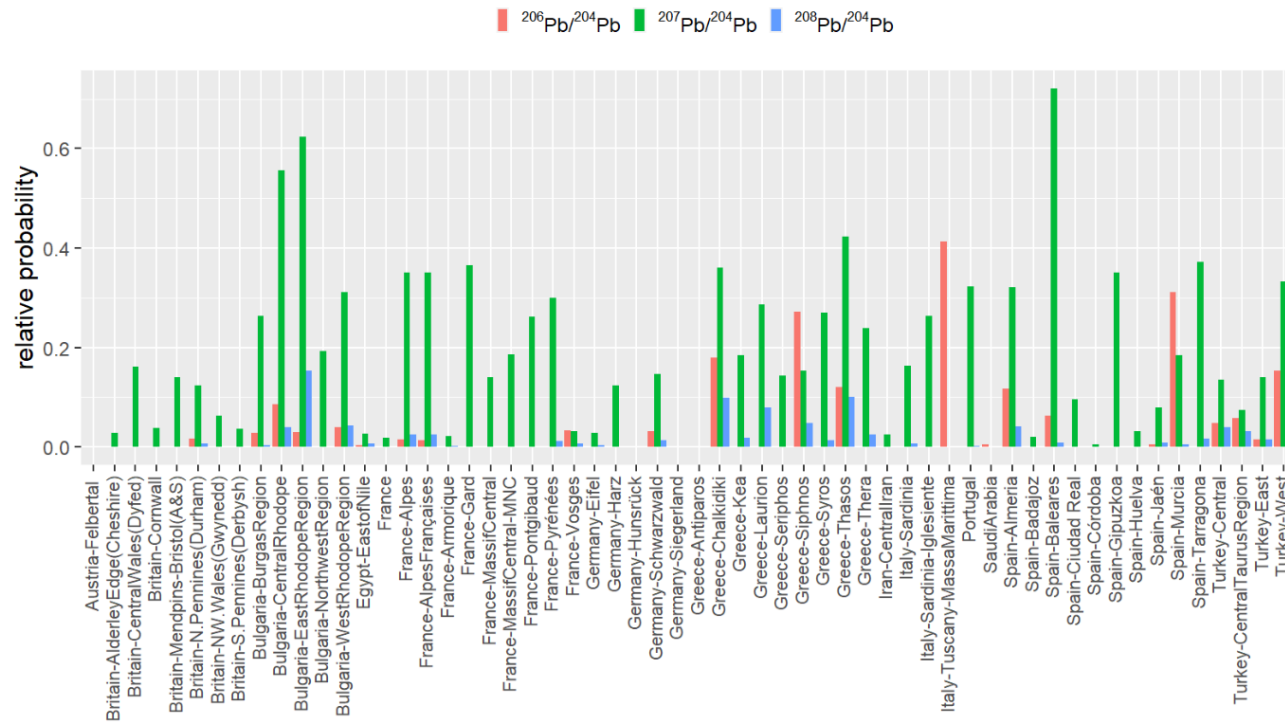

| Mining_Region                  | prob_206 | prob_207 | prob_208 | min>5%? | min |
|--------------------------------|----------|----------|----------|---------|-----|
| Austria-Felbertal              | 0%       | 0%       | 0%       | 0       | 0%  |
| Britain-AlderleyEdge(Cheshire) | 0%       | 3%       | 0%       | 0       | 0%  |
| Britain-CentralWales(Dyfed)    | 0%       | 16%      | 0%       | 0       | 0%  |
| Britain-Cornwall               | 0%       | 4%       | 0%       | 0       | 0%  |
| Britain-Mendips-Bristol(A&S)   | 0%       | 14%      | 0%       | 0       | 0%  |
| Britain-N. Pennines(Durham)    | 2%       | 12%      | 1%       | 0       | 1%  |
| Britain-NW. Wales(Gwynedd)     | 0%       | 6%       | 0%       | 0       | 0%  |
| Britain-S. Pennines(Derbysh)   | 0%       | 4%       | 0%       | 0       | 0%  |
| Bulgaria-BurgasRegion          | 3%       | 26%      | 0%       | 0       | 0%  |
| Bulgaria-CentralRhodope        | 8%       | 56%      | 4%       | 0       | 4%  |
| Bulgaria-EastRhodopeRegion     | 3%       | 62%      | 15%      | 0       | 3%  |
| Bulgaria-NorthwestRegion       | 0%       | 19%      | 0%       | 0       | 0%  |
| Bulgaria-WestRhodopeRegion     | 4%       | 31%      | 4%       | 0       | 4%  |
| Egypt-EastofNile               | 0%       | 3%       | 1%       | 0       | 0%  |
| France                         | 0%       | 2%       | 0%       | 0       | 0%  |
| France-Alpes                   | 1%       | 35%      | 2%       | 0       | 1%  |
| France-AlpesFrançaises         | 1%       | 35%      | 2%       | 0       | 1%  |
| France-Armorique               | 0%       | 2%       | 0%       | 0       | 0%  |
| France-Gard                    | 0%       | 37%      | 0%       | 0       | 0%  |
| France-MassifCentral           | 0%       | 14%      | 0%       | 0       | 0%  |
| France-MassifCentral-MNC       | 0%       | 19%      | 0%       | 0       | 0%  |
| France-Pontgibaud              | 0%       | 26%      | 0%       | 0       | 0%  |
| France-Pyrénées                | 0%       | 30%      | 1%       | 0       | 0%  |
| France-Vosges                  | 3%       | 3%       | 1%       | 0       | 1%  |
| Germany-Eifel                  | 0%       | 3%       | 0%       | 0       | 0%  |
| Germany-Harz                   | 0%       | 12%      | 0%       | 0       | 0%  |
| Germany-Hunsrück               | 0%       | 0%       | 0%       | 0       | 0%  |
| Germany-Schwarzwald            | 3%       | 15%      | 1%       | 0       | 1%  |
| Germany-Siegerland             | 0%       | 0%       | 0%       | 0       | 0%  |
| Greece-Antiparos               | 0%       | 0%       | 0%       | 0       | 0%  |
| Greece-Chalkidiki              | 18%      | 36%      | 10%      | 1       | 10% |
| Greece-Kea                     | 0%       | 18%      | 2%       | 0       | 0%  |
| Greece-Laurion                 | 0%       | 29%      | 8%       | 0       | 0%  |
| Greece-Seriphos                | 0%       | 14%      | 0%       | 0       | 0%  |
| Greece-Siphnos                 | 27%      | 15%      | 5%       | 0       | 5%  |
| Greece-Syros                   | 0%       | 27%      | 1%       | 0       | 0%  |
| Greece-Thasos                  | 12%      | 42%      | 10%      | 1       | 10% |
| Greece-Thera                   | 0%       | 24%      | 2%       | 0       | 0%  |
| Iran-CentrallIran              | 0%       | 3%       | 0%       | 0       | 0%  |
| Italy-Sardinia                 | 0%       | 16%      | 1%       | 0       | 0%  |
| Italy-Sardinia-Iglesiente      | 0%       | 26%      | 0%       | 0       | 0%  |
| Italy-Tuscany-MassaMarittima   | 41%      | 0%       | 0%       | 0       | 0%  |
| Portugal                       | 0%       | 32%      | 0%       | 0       | 0%  |
| SaudiArabia                    | 0%       | 0%       | 0%       | 0       | 0%  |
| Spain-Almeria                  | 12%      | 32%      | 4%       | 0       | 4%  |
| Spain-Badajoz                  | 0%       | 2%       | 0%       | 0       | 0%  |
| Spain-Baleares                 | 6%       | 72%      | 1%       | 0       | 1%  |
| Spain-Ciudad Real              | 0%       | 10%      | 0%       | 0       | 0%  |
| Spain-Córdoba                  | 0%       | 1%       | 0%       | 0       | 0%  |
| Spain-Gipuzkoa                 | 0%       | 35%      | 0%       | 0       | 0%  |
| Spain-Huelva                   | 0%       | 3%       | 0%       | 0       | 0%  |
| Spain-Jaén                     | 0%       | 8%       | 1%       | 0       | 0%  |
| Spain-Murcia                   | 31%      | 18%      | 0%       | 0       | 0%  |
| Spain-Tarragona                | 0%       | 37%      | 2%       | 0       | 0%  |
| Turkey-Central                 | 5%       | 14%      | 4%       | 0       | 4%  |
| Turkey-CentralTaurusRegion     | 6%       | 7%       | 3%       | 0       | 3%  |
| Turkey-East                    | 1%       | 14%      | 1%       | 0       | 1%  |
| Turkey-West                    | 15%      | 33%      | 7%       | 1       | 7%  |

TB037

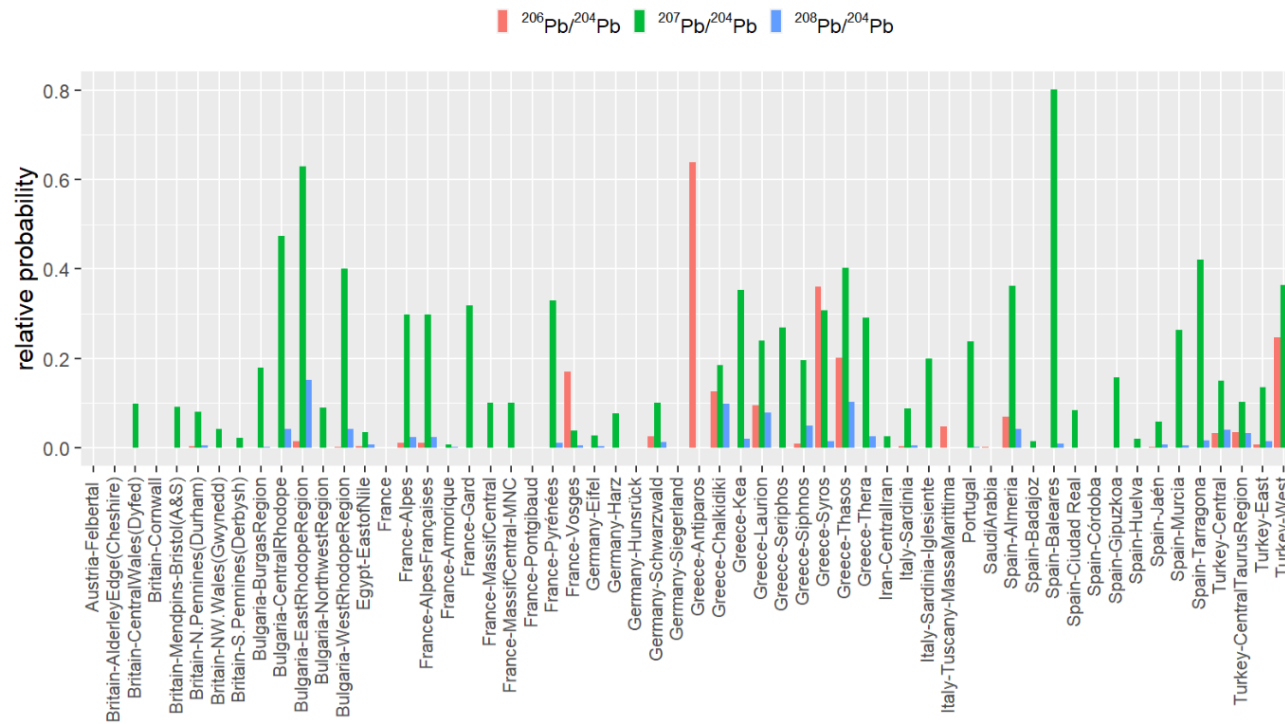

| Mining_Region                  | prob_206 | prob_207 | prob_208 | min>5%? | min |
|--------------------------------|----------|----------|----------|---------|-----|
| Austria-Felbertal              | 0%       | 0%       | 0%       | 0       | 0%  |
| Britain-AlderleyEdge(Cheshire) | 0%       | 0%       | 0%       | 0       | 0%  |
| Britain-CentralWales(Dyfed)    | 0%       | 10%      | 0%       | 0       | 0%  |
| Britain-Cornwall               | 0%       | 0%       | 0%       | 0       | 0%  |
| Britain-Mendips-Bristol(A&S)   | 0%       | 9%       | 0%       | 0       | 0%  |
| Britain-N.Pennines(Durham)     | 0%       | 8%       | 1%       | 0       | 0%  |
| Britain-NW.Wales(Gwynedd)      | 0%       | 4%       | 0%       | 0       | 0%  |
| Britain-S.Pennines(Derbysh)    | 0%       | 2%       | 0%       | 0       | 0%  |
| Bulgaria-BurgasRegion          | 0%       | 18%      | 0%       | 0       | 0%  |
| Bulgaria-CentralRhodope        | 0%       | 47%      | 4%       | 0       | 0%  |
| Bulgaria-EastRhodopeRegion     | 1%       | 63%      | 15%      | 0       | 1%  |
| Bulgaria-NorthwestRegion       | 0%       | 9%       | 0%       | 0       | 0%  |
| Bulgaria-WestRhodopeRegion     | 0%       | 40%      | 4%       | 0       | 0%  |
| Egypt-EastofNile               | 0%       | 4%       | 1%       | 0       | 0%  |
| France                         | 0%       | 0%       | 0%       | 0       | 0%  |
| France-Alpes                   | 1%       | 30%      | 2%       | 0       | 1%  |
| France-AlpesFrançaises         | 1%       | 30%      | 2%       | 0       | 1%  |
| France-Armorique               | 0%       | 1%       | 0%       | 0       | 0%  |
| France-Gard                    | 0%       | 32%      | 0%       | 0       | 0%  |
| France-MassifCentral           | 0%       | 10%      | 0%       | 0       | 0%  |
| France-MassifCentral-MNC       | 0%       | 10%      | 0%       | 0       | 0%  |
| France-Pontgibaud              | 0%       | 0%       | 0%       | 0       | 0%  |
| France-Pyrénées                | 0%       | 33%      | 1%       | 0       | 0%  |
| France-Vosges                  | 17%      | 4%       | 1%       | 0       | 1%  |
| Germany-Eifel                  | 0%       | 3%       | 0%       | 0       | 0%  |
| Germany-Harz                   | 0%       | 8%       | 0%       | 0       | 0%  |
| Germany-Hunsrück               | 0%       | 0%       | 0%       | 0       | 0%  |
| Germany-Schwarzwald            | 3%       | 10%      | 1%       | 0       | 1%  |
| Germany-Siegerland             | 0%       | 0%       | 0%       | 0       | 0%  |
| Greece-Antiparos               | 64%      | 0%       | 0%       | 0       | 0%  |
| Greece-Chalkidiki              | 13%      | 19%      | 10%      | 1       | 10% |
| Greece-Kea                     | 0%       | 35%      | 2%       | 0       | 0%  |
| Greece-Laurion                 | 9%       | 24%      | 8%       | 1       | 8%  |
| Greece-Seriphos                | 0%       | 27%      | 0%       | 0       | 0%  |
| Greece-Siphnos                 | 1%       | 20%      | 5%       | 0       | 1%  |
| Greece-Syros                   | 36%      | 31%      | 1%       | 0       | 1%  |
| Greece-Thasos                  | 20%      | 40%      | 10%      | 1       | 10% |
| Greece-Thera                   | 0%       | 29%      | 3%       | 0       | 0%  |
| Iran-Centrallran               | 0%       | 3%       | 0%       | 0       | 0%  |
| Italy-Sardinia                 | 0%       | 9%       | 1%       | 0       | 0%  |
| Italy-Sardinia-Iglesiente      | 0%       | 20%      | 0%       | 0       | 0%  |
| Italy-Tuscany-MassaMarittima   | 5%       | 0%       | 0%       | 0       | 0%  |
| Portugal                       | 0%       | 24%      | 0%       | 0       | 0%  |
| SaudiArabia                    | 0%       | 0%       | 0%       | 0       | 0%  |
| Spain-Almeria                  | 7%       | 36%      | 4%       | 0       | 4%  |
| Spain-Badajoz                  | 0%       | 1%       | 0%       | 0       | 0%  |
| Spain-Baleares                 | 0%       | 80%      | 1%       | 0       | 0%  |
| Spain-Ciudad Real              | 0%       | 8%       | 0%       | 0       | 0%  |
| Spain-Córdoba                  | 0%       | 0%       | 0%       | 0       | 0%  |
| Spain-Gipuzkoa                 | 0%       | 16%      | 0%       | 0       | 0%  |
| Spain-Huelva                   | 0%       | 2%       | 0%       | 0       | 0%  |
| Spain-Jaén                     | 0%       | 6%       | 1%       | 0       | 0%  |
| Spain-Murcia                   | 0%       | 26%      | 1%       | 0       | 0%  |
| Spain-Tarragona                | 0%       | 42%      | 2%       | 0       | 0%  |
| Turkey-Central                 | 3%       | 15%      | 4%       | 0       | 3%  |
| Turkey-CentralTaurusRegion     | 4%       | 10%      | 3%       | 0       | 3%  |
| Turkey-East                    | 1%       | 13%      | 1%       | 0       | 1%  |
| Turkey-West                    | 25%      | 36%      | 7%       | 1       | 7%  |

TB039

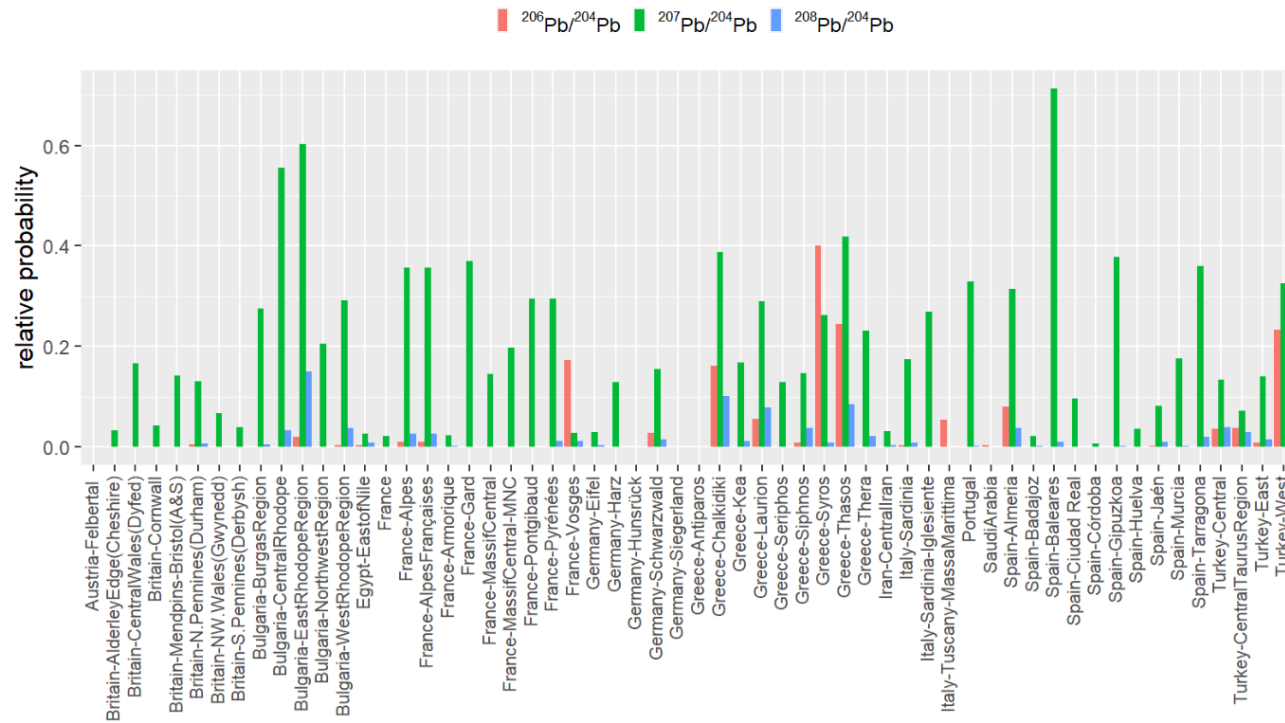

| Mining_Region                  | prob_206 | prob_207 | prob_208 | min>5%? | min |
|--------------------------------|----------|----------|----------|---------|-----|
| Austria-Felbertal              | 0%       | 0%       | 0%       | 0       | 0%  |
| Britain-AlderleyEdge(Cheshire) | 0%       | 3%       | 0%       | 0       | 0%  |
| Britain-CentralWales(Dyfed)    | 0%       | 17%      | 0%       | 0       | 0%  |
| Britain-Cornwall               | 0%       | 4%       | 0%       | 0       | 0%  |
| Britain-Mendpms-Bristol(A&S)   | 0%       | 14%      | 0%       | 0       | 0%  |
| Britain-N. Pennines(Durham)    | 0%       | 13%      | 1%       | 0       | 0%  |
| Britain-NW. Wales(Gwynedd)     | 0%       | 7%       | 0%       | 0       | 0%  |
| Britain-S. Pennines(Derbysh)   | 0%       | 4%       | 0%       | 0       | 0%  |
| Bulgaria-BurgasRegion          | 0%       | 27%      | 0%       | 0       | 0%  |
| Bulgaria-CentralRhodope        | 0%       | 55%      | 3%       | 0       | 0%  |
| Bulgaria-EastRhodopeRegion     | 2%       | 60%      | 15%      | 0       | 2%  |
| Bulgaria-NorthwestRegion       | 0%       | 21%      | 0%       | 0       | 0%  |
| Bulgaria-WestRhodopeRegion     | 0%       | 29%      | 4%       | 0       | 0%  |
| Egypt-EastofNile               | 0%       | 3%       | 1%       | 0       | 0%  |
| France                         | 0%       | 2%       | 0%       | 0       | 0%  |
| France-Alpes                   | 1%       | 36%      | 3%       | 0       | 1%  |
| France-AlpesFrançaises         | 1%       | 36%      | 3%       | 0       | 1%  |
| France-Armorique               | 0%       | 2%       | 0%       | 0       | 0%  |
| France-Gard                    | 0%       | 37%      | 0%       | 0       | 0%  |
| France-MassifCentral           | 0%       | 15%      | 0%       | 0       | 0%  |
| France-MassifCentral-MNC       | 0%       | 20%      | 0%       | 0       | 0%  |
| France-Pontgibaud              | 0%       | 29%      | 0%       | 0       | 0%  |
| France-Pyrénées                | 0%       | 30%      | 1%       | 0       | 0%  |
| France-Vosges                  | 17%      | 3%       | 1%       | 0       | 1%  |
| Germany-Eifel                  | 0%       | 3%       | 0%       | 0       | 0%  |
| Germany-Harz                   | 0%       | 13%      | 0%       | 0       | 0%  |
| Germany-Hunsrück               | 0%       | 0%       | 0%       | 0       | 0%  |
| Germany-Schwarzwald            | 3%       | 15%      | 1%       | 0       | 1%  |
| Germany-Siegerland             | 0%       | 0%       | 0%       | 0       | 0%  |
| Greece-Antiparos               | 0%       | 0%       | 0%       | 0       | 0%  |
| Greece-Chalkidiki              | 16%      | 39%      | 10%      | 1       | 10% |
| Greece-Kea                     | 0%       | 17%      | 1%       | 0       | 0%  |
| Greece-Laurion                 | 6%       | 29%      | 8%       | 1       | 6%  |
| Greece-Seriphos                | 0%       | 13%      | 0%       | 0       | 0%  |
| Greece-Siphnos                 | 1%       | 15%      | 4%       | 0       | 1%  |
| Greece-Syros                   | 40%      | 26%      | 1%       | 0       | 1%  |
| Greece-Thasos                  | 24%      | 42%      | 9%       | 1       | 9%  |
| Greece-Thera                   | 0%       | 23%      | 2%       | 0       | 0%  |
| Iran-Centrallran               | 0%       | 3%       | 0%       | 0       | 0%  |
| Italy-Sardinia                 | 0%       | 17%      | 1%       | 0       | 0%  |
| Italy-Sardinia-Iglesiente      | 0%       | 27%      | 0%       | 0       | 0%  |
| Italy-Tuscany-MassaMarittima   | 5%       | 0%       | 0%       | 0       | 0%  |
| Portugal                       | 0%       | 33%      | 0%       | 0       | 0%  |
| SaudiArabia                    | 0%       | 0%       | 0%       | 0       | 0%  |
| Spain-Almeria                  | 8%       | 31%      | 4%       | 0       | 4%  |
| Spain-Badajoz                  | 0%       | 2%       | 0%       | 0       | 0%  |
| Spain-Baleares                 | 0%       | 71%      | 1%       | 0       | 0%  |
| Spain-Ciudad Real              | 0%       | 10%      | 0%       | 0       | 0%  |
| Spain-Córdoba                  | 0%       | 1%       | 0%       | 0       | 0%  |
| Spain-Gipuzkoa                 | 0%       | 38%      | 0%       | 0       | 0%  |
| Spain-Huelva                   | 0%       | 4%       | 0%       | 0       | 0%  |
| Spain-Jaén                     | 0%       | 8%       | 1%       | 0       | 0%  |
| Spain-Murcia                   | 0%       | 18%      | 0%       | 0       | 0%  |
| Spain-Tarragona                | 0%       | 36%      | 2%       | 0       | 0%  |
| Turkey-Central                 | 4%       | 13%      | 4%       | 0       | 4%  |
| Turkey-CentralTaurusRegion     | 4%       | 7%       | 3%       | 0       | 3%  |
| Turkey-East                    | 1%       | 14%      | 2%       | 0       | 1%  |
| Turkey-West                    | 23%      | 33%      | 7%       | 1       | 7%  |

a. Chalkidiki

22-Denarius-44-5

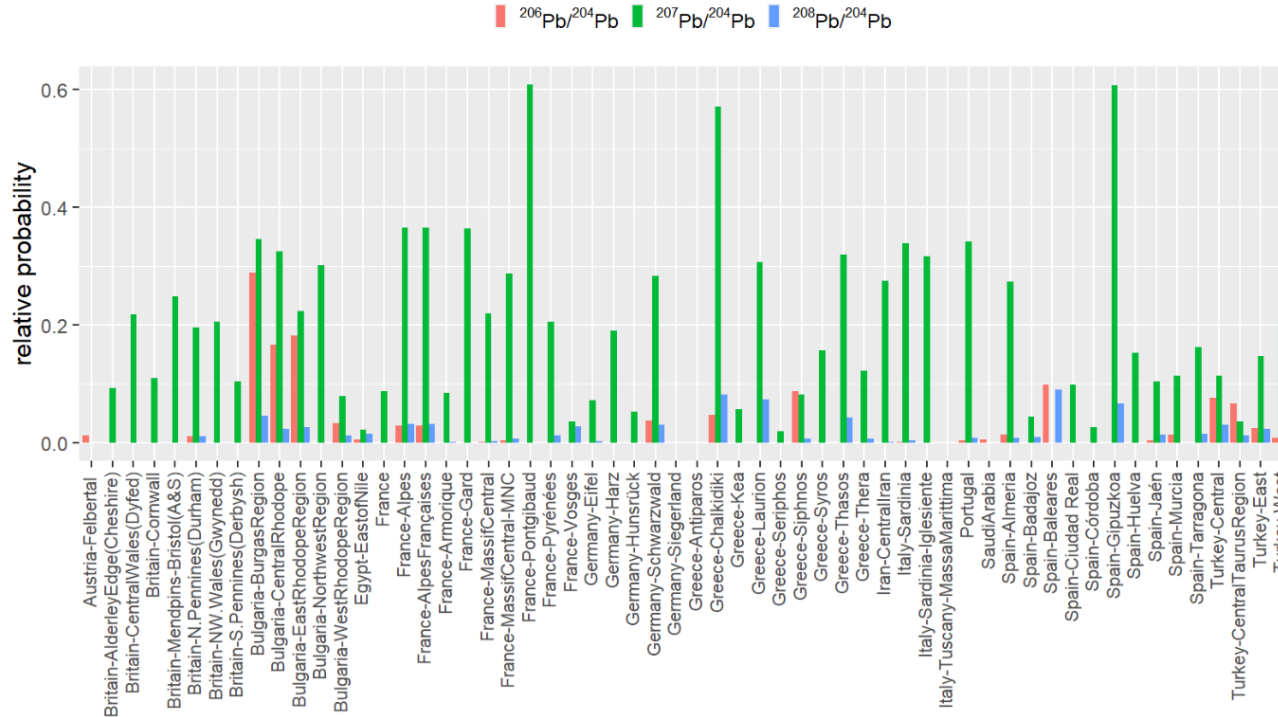

| Mining_Region                  | prob_206 | prob_207 | prob_208 | min>5%? | min |
|--------------------------------|----------|----------|----------|---------|-----|
| Austria-Felbertal              | 1%       | 0%       | 0%       | 0       | 0%  |
| Britain-AlderleyEdge(Cheshire) | 0%       | 9%       | 0%       | 0       | 0%  |
| Britain-CentralWales(Dyfed)    | 0%       | 22%      | 0%       | 0       | 0%  |
| Britain-Cornwall               | 0%       | 11%      | 0%       | 0       | 0%  |
| Britain-Mendpins-Bristol(A&S)  | 0%       | 25%      | 0%       | 0       | 0%  |
| Britain-N.Pennines(Durham)     | 1%       | 20%      | 1%       | 0       | 1%  |
| Britain-NW.Wales(Gwynedd)      | 0%       | 21%      | 0%       | 0       | 0%  |
| Britain-S.Pennines(Derbysh)    | 0%       | 10%      | 0%       | 0       | 0%  |
| Bulgaria-BurgasRegion          | 29%      | 35%      | 5%       | 0       | 5%  |
| Bulgaria-CentralRhodope        | 17%      | 33%      | 2%       | 0       | 2%  |
| Bulgaria-EastRhodopeRegion     | 18%      | 22%      | 3%       | 0       | 3%  |
| Bulgaria-NorthwestRegion       | 0%       | 30%      | 0%       | 0       | 0%  |
| Bulgaria-WestRhodopeRegion     | 3%       | 8%       | 1%       | 0       | 1%  |
| Egypt-EastofNile               | 1%       | 2%       | 2%       | 0       | 1%  |
| France                         | 0%       | 9%       | 0%       | 0       | 0%  |
| France-Alpes                   | 3%       | 37%      | 3%       | 0       | 3%  |
| France-AlpesFrançaises         | 3%       | 37%      | 3%       | 0       | 3%  |
| France-Armorique               | 0%       | 8%       | 0%       | 0       | 0%  |
| France-Gard                    | 0%       | 36%      | 0%       | 0       | 0%  |
| France-MassifCentral           | 0%       | 22%      | 0%       | 0       | 0%  |
| France-MassifCentral-MNC       | 0%       | 29%      | 1%       | 0       | 0%  |
| France-Pontgibaud              | 0%       | 61%      | 0%       | 0       | 0%  |
| France-Pyrénées                | 0%       | 21%      | 1%       | 0       | 0%  |
| France-Vosges                  | 0%       | 4%       | 3%       | 0       | 0%  |
| Germany-Eifel                  | 0%       | 7%       | 0%       | 0       | 0%  |
| Germany-Harz                   | 0%       | 19%      | 0%       | 0       | 0%  |
| Germany-Hunsrück               | 0%       | 5%       | 0%       | 0       | 0%  |
| Germany-Schwarzwald            | 4%       | 28%      | 3%       | 0       | 3%  |
| Germany-Siegerland             | 0%       | 0%       | 0%       | 0       | 0%  |
| Greece-Antiparos               | 0%       | 0%       | 0%       | 0       | 0%  |
| Greece-Chalkidiki              | 5%       | 57%      | 8%       | 0       | 5%  |
| Greece-Kea                     | 0%       | 6%       | 0%       | 0       | 0%  |
| Greece-Laurion                 | 0%       | 31%      | 7%       | 0       | 0%  |
| Greece-Seriphos                | 0%       | 2%       | 0%       | 0       | 0%  |
| Greece-Siphnos                 | 9%       | 8%       | 1%       | 0       | 1%  |
| Greece-Syros                   | 0%       | 16%      | 0%       | 0       | 0%  |
| Greece-Thasos                  | 0%       | 32%      | 4%       | 0       | 0%  |
| Greece-Thera                   | 0%       | 12%      | 1%       | 0       | 0%  |
| Iran-CentralIran               | 0%       | 27%      | 0%       | 0       | 0%  |
| Italy-Sardinia-Iglesiente      | 0%       | 34%      | 0%       | 0       | 0%  |
| Italy-Tuscany-MassaMarittima   | 0%       | 0%       | 0%       | 0       | 0%  |
| Portugal                       | 0%       | 34%      | 1%       | 0       | 0%  |
| SaudiArabia                    | 1%       | 0%       | 0%       | 0       | 0%  |
| Spain-Almeria                  | 1%       | 27%      | 1%       | 0       | 1%  |
| Spain-Badajoz                  | 0%       | 4%       | 1%       | 0       | 0%  |
| Spain-Baleares                 | 10%      | 0%       | 9%       | 0       | 0%  |
| Spain-Ciudad Real              | 0%       | 10%      | 0%       | 0       | 0%  |
| Spain-Córdoba                  | 0%       | 3%       | 0%       | 0       | 0%  |
| Spain-Gipuzkoa                 | 0%       | 61%      | 7%       | 0       | 0%  |
| Spain-Huelva                   | 0%       | 15%      | 0%       | 0       | 0%  |
| Spain-Jaén                     | 0%       | 10%      | 1%       | 0       | 0%  |
| Spain-Murcia                   | 1%       | 11%      | 0%       | 0       | 0%  |
| Spain-Tarragona                | 0%       | 16%      | 2%       | 0       | 0%  |
| Turkey-Central                 | 8%       | 11%      | 3%       | 0       | 3%  |
| Turkey-CentralTaurusRegion     | 7%       | 4%       | 1%       | 0       | 1%  |
| Turkey-East                    | 3%       | 15%      | 2%       | 0       | 2%  |
| Turkey-West                    | 1%       | 21%      | 4%       | 0       | 1%  |



b. Chalkidiki – Thasos

4-Quinarius-44-6

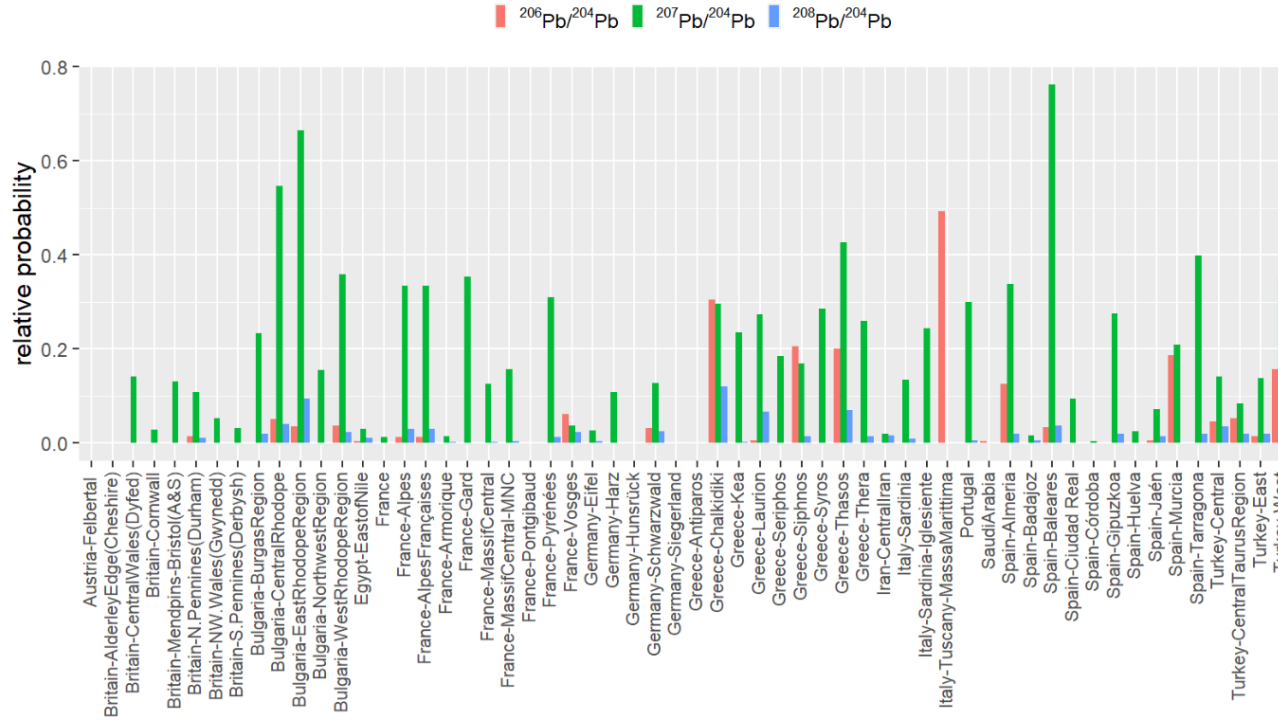

| Mining_Region                  | prob_206 | prob_207 | prob_208 | min>5%? | min |
|--------------------------------|----------|----------|----------|---------|-----|
| Austria-Felbertal              | 0%       | 0%       | 0%       | 0       | 0%  |
| Britain-AlderleyEdge(Cheshire) | 0%       | 0%       | 0%       | 0       | 0%  |
| Britain-CentralWales(Dyfed)    | 0%       | 14%      | 0%       | 0       | 0%  |
| Britain-Cornwall               | 0%       | 3%       | 0%       | 0       | 0%  |
| Britain-Mendips-Bristol(A&S)   | 0%       | 13%      | 0%       | 0       | 0%  |
| Britain-N.Pennines(Durham)     | 1%       | 11%      | 1%       | 0       | 1%  |
| Britain-NW.Wales(Gwynedd)      | 0%       | 5%       | 0%       | 0       | 0%  |
| Britain-S.Pennines(Derbysh)    | 0%       | 3%       | 0%       | 0       | 0%  |
| Bulgaria-BurgasRegion          | 0%       | 23%      | 2%       | 0       | 0%  |
| Bulgaria-CentralRhodope        | 5%       | 55%      | 4%       | 0       | 4%  |
| Bulgaria-EastRhodopeRegion     | 3%       | 66%      | 9%       | 0       | 3%  |
| Bulgaria-NorthwestRegion       | 0%       | 16%      | 0%       | 0       | 0%  |
| Bulgaria-WestRhodopeRegion     | 4%       | 36%      | 2%       | 0       | 2%  |
| Egypt-EastofNile               | 0%       | 3%       | 1%       | 0       | 0%  |
| France                         | 0%       | 1%       | 0%       | 0       | 0%  |
| France-Alpes                   | 1%       | 33%      | 3%       | 0       | 1%  |
| France-AlpesFrançaises         | 1%       | 33%      | 3%       | 0       | 1%  |
| France-Armorique               | 0%       | 1%       | 0%       | 0       | 0%  |
| France-Gard                    | 0%       | 35%      | 0%       | 0       | 0%  |
| France-MassifCentral           | 0%       | 13%      | 0%       | 0       | 0%  |
| France-MassifCentral-MNC       | 0%       | 16%      | 0%       | 0       | 0%  |
| France-Pontgibaud              | 0%       | 0%       | 0%       | 0       | 0%  |
| France-Pyrénées                | 0%       | 31%      | 1%       | 0       | 0%  |
| France-Vosges                  | 6%       | 4%       | 2%       | 0       | 2%  |
| Germany-Eifel                  | 0%       | 3%       | 0%       | 0       | 0%  |
| Germany-Harz                   | 0%       | 11%      | 0%       | 0       | 0%  |
| Germany-Hunsrück               | 0%       | 0%       | 0%       | 0       | 0%  |
| Germany-Schwarzwald            | 3%       | 13%      | 2%       | 0       | 2%  |
| Germany-Siegerland             | 0%       | 0%       | 0%       | 0       | 0%  |
| Greece-Antiparos               | 0%       | 0%       | 0%       | 0       | 0%  |
| Greece-Chalkidiki              | 30%      | 30%      | 12%      | 1       | 12% |
| Greece-Kea                     | 0%       | 23%      | 0%       | 0       | 0%  |
| Greece-Laurion                 | 0%       | 27%      | 7%       | 0       | 0%  |
| Greece-Seriphos                | 0%       | 18%      | 0%       | 0       | 0%  |
| Greece-Siphnos                 | 21%      | 17%      | 1%       | 0       | 1%  |
| Greece-Syros                   | 0%       | 29%      | 0%       | 0       | 0%  |
| Greece-Thasos                  | 20%      | 43%      | 7%       | 1       | 7%  |
| Greece-Thera                   | 0%       | 26%      | 1%       | 0       | 0%  |
| Iran-CentralIran               | 0%       | 2%       | 2%       | 0       | 0%  |
| Italy-Sardinia-Iglesiente      | 0%       | 13%      | 1%       | 0       | 0%  |
| Italy-Tuscany-MassaMarittima   | 49%      | 0%       | 0%       | 0       | 0%  |
| Portugal                       | 0%       | 30%      | 0%       | 0       | 0%  |
| SaudiArabia                    | 0%       | 0%       | 0%       | 0       | 0%  |
| Spain-Almeria                  | 13%      | 34%      | 2%       | 0       | 2%  |
| Spain-Badajoz                  | 0%       | 2%       | 1%       | 0       | 0%  |
| Spain-Baleares                 | 3%       | 76%      | 4%       | 0       | 3%  |
| Spain-Ciudad Real              | 0%       | 9%       | 0%       | 0       | 0%  |
| Spain-Córdoba                  | 0%       | 0%       | 0%       | 0       | 0%  |
| Spain-Gipuzkoa                 | 0%       | 27%      | 2%       | 0       | 0%  |
| Spain-Huelva                   | 0%       | 2%       | 0%       | 0       | 0%  |
| Spain-Jaén                     | 0%       | 7%       | 1%       | 0       | 0%  |
| Spain-Murcia                   | 19%      | 21%      | 0%       | 0       | 0%  |
| Spain-Tarragona                | 0%       | 40%      | 2%       | 0       | 0%  |
| Turkey-Central                 | 5%       | 14%      | 3%       | 0       | 3%  |
| Turkey-CentralTaurusRegion     | 5%       | 8%       | 2%       | 0       | 2%  |
| Turkey-East                    | 1%       | 14%      | 2%       | 0       | 1%  |
| Turkey-West                    | 16%      | 35%      | 6%       | 1       | 6%  |

12-Denarius-113-1

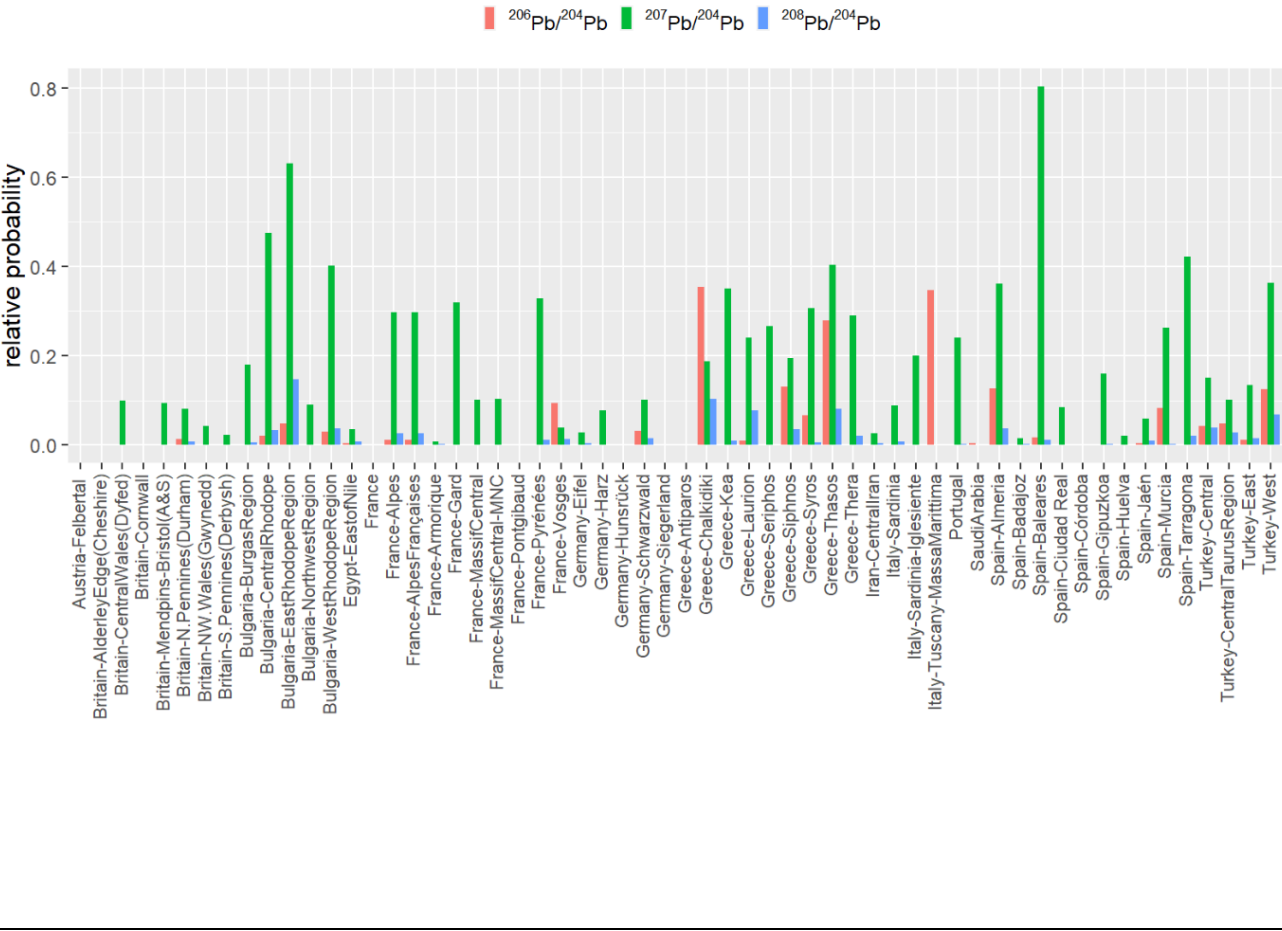

| Mining_Region                  | prob_206 | prob_207 | prob_208 | min>5%? | min |
|--------------------------------|----------|----------|----------|---------|-----|
| Austria-Felbertal              | 0%       | 0%       | 0%       | 0       | 0%  |
| Britain-AlderleyEdge(Cheshire) | 0%       | 0%       | 0%       | 0       | 0%  |
| Britain-CentralWales(Dyfed)    | 0%       | 10%      | 0%       | 0       | 0%  |
| Britain-Cornwall               | 0%       | 0%       | 0%       | 0       | 0%  |
| Britain-Mendips-Bristol(A&S)   | 0%       | 9%       | 0%       | 0       | 0%  |
| Britain-N.Pennines(Durham)     | 1%       | 8%       | 1%       | 0       | 1%  |
| Britain-NW.Wales(Gwynedd)      | 0%       | 4%       | 0%       | 0       | 0%  |
| Britain-S.Pennines(Derbysh)    | 0%       | 2%       | 0%       | 0       | 0%  |
| Bulgaria-BurgasRegion          | 0%       | 18%      | 1%       | 0       | 0%  |
| Bulgaria-CentralRhodope        | 2%       | 48%      | 3%       | 0       | 2%  |
| Bulgaria-EastRhodopeRegion     | 5%       | 63%      | 15%      | 0       | 5%  |
| Bulgaria-NorthwestRegion       | 0%       | 9%       | 0%       | 0       | 0%  |
| Bulgaria-WestRhodopeRegion     | 3%       | 40%      | 4%       | 0       | 3%  |
| Egypt-EastofNile               | 0%       | 4%       | 1%       | 0       | 0%  |
| France                         | 0%       | 0%       | 0%       | 0       | 0%  |
| France-Alpes                   | 1%       | 30%      | 3%       | 0       | 1%  |
| France-AlpesFrançaises         | 1%       | 30%      | 3%       | 0       | 1%  |
| France-Armorique               | 0%       | 1%       | 0%       | 0       | 0%  |
| France-Gard                    | 0%       | 32%      | 0%       | 0       | 0%  |
| France-MassifCentral           | 0%       | 10%      | 0%       | 0       | 0%  |
| France-MassifCentral-MNC       | 0%       | 10%      | 0%       | 0       | 0%  |
| France-Pontgibaud              | 0%       | 0%       | 0%       | 0       | 0%  |
| France-Pyrénées                | 0%       | 33%      | 1%       | 0       | 0%  |
| France-Vosges                  | 9%       | 4%       | 1%       | 0       | 1%  |
| Germany-Eifel                  | 0%       | 3%       | 0%       | 0       | 0%  |
| Germany-Harz                   | 0%       | 8%       | 0%       | 0       | 0%  |
| Germany-Hunsrück               | 0%       | 0%       | 0%       | 0       | 0%  |
| Germany-Schwarzwald            | 3%       | 10%      | 1%       | 0       | 1%  |
| Germany-Siegerland             | 0%       | 0%       | 0%       | 0       | 0%  |
| Greece-Antiparos               | 0%       | 0%       | 0%       | 0       | 0%  |
| Greece-Chalkidiki              | 35%      | 19%      | 10%      | 1       | 10% |
| Greece-Kea                     | 0%       | 35%      | 1%       | 0       | 0%  |
| Greece-Laurion                 | 1%       | 24%      | 8%       | 0       | 1%  |
| Greece-Seriphos                | 0%       | 27%      | 0%       | 0       | 0%  |
| Greece-Siphnos                 | 13%      | 20%      | 3%       | 0       | 3%  |
| Greece-Syros                   | 7%       | 31%      | 1%       | 0       | 1%  |
| Greece-Thasos                  | 28%      | 40%      | 8%       | 1       | 8%  |
| Greece-Thera                   | 0%       | 29%      | 2%       | 0       | 0%  |
| Iran-Centrallran               | 0%       | 3%       | 0%       | 0       | 0%  |
| Italy-Sardinia-Iglesiente      | 0%       | 9%       | 1%       | 0       | 0%  |
| Italy-Tuscany-MassaMarittima   | 35%      | 0%       | 0%       | 0       | 0%  |
| Portugal                       | 0%       | 24%      | 0%       | 0       | 0%  |
| SaudiArabia                    | 0%       | 0%       | 0%       | 0       | 0%  |
| Spain-Almeria                  | 13%      | 36%      | 4%       | 0       | 4%  |
| Spain-Badajoz                  | 0%       | 1%       | 0%       | 0       | 0%  |
| Spain-Baleares                 | 2%       | 80%      | 1%       | 0       | 1%  |
| Spain-Ciudad Real              | 0%       | 8%       | 0%       | 0       | 0%  |
| Spain-Córdoba                  | 0%       | 0%       | 0%       | 0       | 0%  |
| Spain-Gipuzkoa                 | 0%       | 16%      | 0%       | 0       | 0%  |
| Spain-Huelva                   | 0%       | 2%       | 0%       | 0       | 0%  |
| Spain-Jaén                     | 0%       | 6%       | 1%       | 0       | 0%  |
| Spain-Murcia                   | 8%       | 26%      | 0%       | 0       | 0%  |
| Spain-Tarragona                | 0%       | 42%      | 2%       | 0       | 0%  |
| Turkey-Central                 | 4%       | 15%      | 4%       | 0       | 4%  |
| Turkey-CentralTaurusRegion     | 5%       | 10%      | 3%       | 0       | 3%  |
| Turkey-East                    | 1%       | 13%      | 2%       | 0       | 1%  |
| Turkey-West                    | 12%      | 36%      | 7%       | 1       | 7%  |

MS003

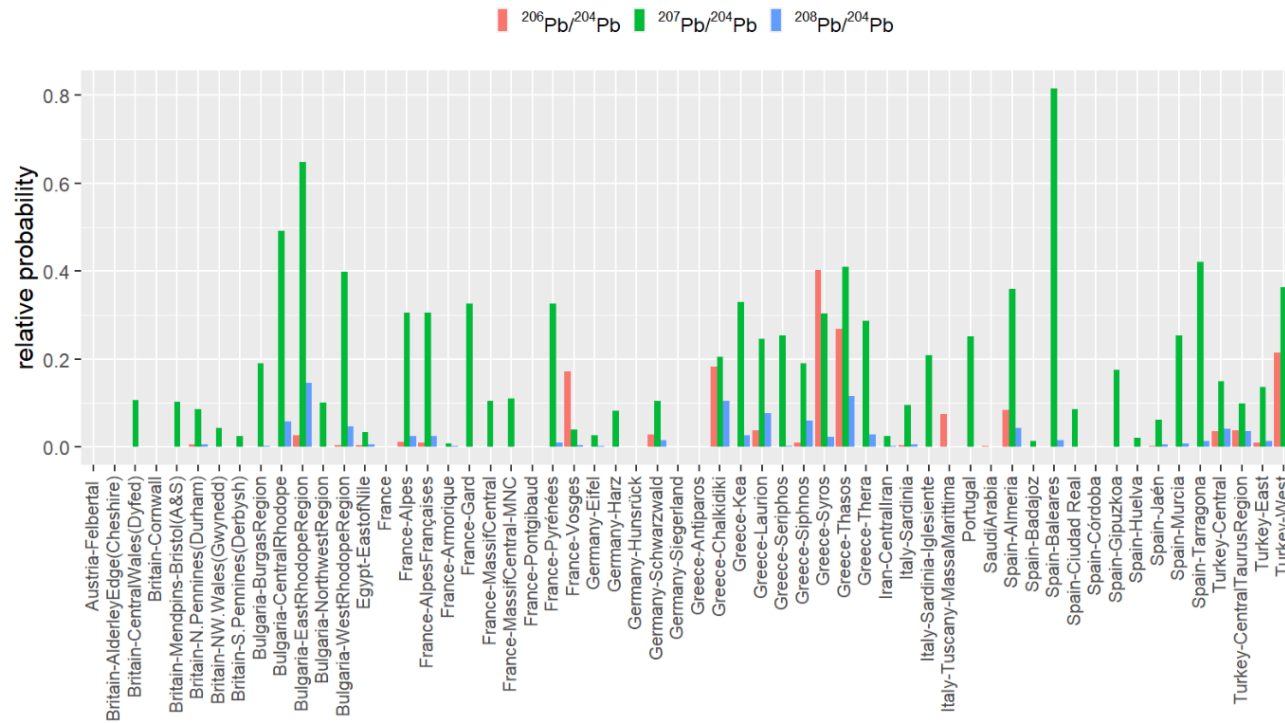

| Mining_Region                  | prob_206 | prob_207 | prob_208 | min>5%? | min |
|--------------------------------|----------|----------|----------|---------|-----|
| Austria-Felbertal              | 0%       | 0%       | 0%       | 0       | 0%  |
| Britain-AlderleyEdge(Cheshire) | 0%       | 0%       | 0%       | 0       | 0%  |
| Britain-CentralWales(Dyfed)    | 0%       | 11%      | 0%       | 0       | 0%  |
| Britain-Cornwall               | 0%       | 0%       | 0%       | 0       | 0%  |
| Britain-Mendpins-Bristol(A&S)  | 0%       | 10%      | 0%       | 0       | 0%  |
| Britain-N.Pennines(Durham)     | 1%       | 9%       | 1%       | 0       | 1%  |
| Britain-NW.Wales(Gwynedd)      | 0%       | 4%       | 0%       | 0       | 0%  |
| Britain-S.Pennines(Derbysh)    | 0%       | 2%       | 0%       | 0       | 0%  |
| Bulgaria-BurgasRegion          | 0%       | 19%      | 0%       | 0       | 0%  |
| Bulgaria-CentralRhodope        | 0%       | 49%      | 6%       | 0       | 0%  |
| Bulgaria-EastRhodopeRegion     | 3%       | 65%      | 15%      | 0       | 3%  |
| Bulgaria-NorthwestRegion       | 0%       | 10%      | 0%       | 0       | 0%  |
| Bulgaria-WestRhodopeRegion     | 0%       | 40%      | 5%       | 0       | 0%  |
| Egypt-EastofNile               | 0%       | 3%       | 1%       | 0       | 0%  |
| France                         | 0%       | 0%       | 0%       | 0       | 0%  |
| France-Alpes                   | 1%       | 30%      | 2%       | 0       | 1%  |
| France-AlpesFrançaises         | 1%       | 30%      | 2%       | 0       | 1%  |
| France-Armorique               | 0%       | 1%       | 0%       | 0       | 0%  |
| France-Gard                    | 0%       | 33%      | 0%       | 0       | 0%  |
| France-MassifCentral           | 0%       | 10%      | 0%       | 0       | 0%  |
| France-MassifCentral-MNC       | 0%       | 11%      | 0%       | 0       | 0%  |
| France-Pontgibaud              | 0%       | 0%       | 0%       | 0       | 0%  |
| France-Pyrénées                | 0%       | 33%      | 1%       | 0       | 0%  |
| France-Vosges                  | 17%      | 4%       | 0%       | 0       | 0%  |
| Germany-Eifel                  | 0%       | 3%       | 0%       | 0       | 0%  |
| Germany-Harz                   | 0%       | 8%       | 0%       | 0       | 0%  |
| Germany-Hunsrück               | 0%       | 0%       | 0%       | 0       | 0%  |
| Germany-Schwarzwald            | 3%       | 10%      | 1%       | 0       | 1%  |
| Germany-Siegerland             | 0%       | 0%       | 0%       | 0       | 0%  |
| Greece-Antiparos               | 0%       | 0%       | 0%       | 0       | 0%  |
| Greece-Chalkidiki              | 18%      | 21%      | 10%      | 1       | 10% |
| Greece-Kea                     | 0%       | 33%      | 3%       | 0       | 0%  |
| Greece-Laurion                 | 4%       | 25%      | 8%       | 0       | 4%  |
| Greece-Seriphos                | 0%       | 25%      | 0%       | 0       | 0%  |
| Greece-Siphnos                 | 1%       | 19%      | 6%       | 0       | 1%  |
| Greece-Syros                   | 40%      | 30%      | 2%       | 0       | 2%  |
| Greece-Thasos                  | 27%      | 41%      | 12%      | 1       | 12% |
| Greece-Thera                   | 0%       | 29%      | 3%       | 0       | 0%  |
| Iran-Centrallran               | 0%       | 2%       | 0%       | 0       | 0%  |
| Italy-Sardinia                 | 0%       | 10%      | 0%       | 0       | 0%  |
| Italy-Sardinia-Iglesiente      | 0%       | 21%      | 0%       | 0       | 0%  |
| Italy-Tuscany-MassaMarittima   | 7%       | 0%       | 0%       | 0       | 0%  |
| Portugal                       | 0%       | 25%      | 0%       | 0       | 0%  |
| SaudiArabia                    | 0%       | 0%       | 0%       | 0       | 0%  |
| Spain-Almeria                  | 8%       | 36%      | 4%       | 0       | 4%  |
| Spain-Badajoz                  | 0%       | 1%       | 0%       | 0       | 0%  |
| Spain-Balears                  | 0%       | 82%      | 2%       | 0       | 0%  |
| Spain-Ciudad Real              | 0%       | 9%       | 0%       | 0       | 0%  |
| Spain-Córdoba                  | 0%       | 0%       | 0%       | 0       | 0%  |
| Spain-Gipuzkoa                 | 0%       | 18%      | 0%       | 0       | 0%  |
| Spain-Huelva                   | 0%       | 2%       | 0%       | 0       | 0%  |
| Spain-Jaén                     | 0%       | 6%       | 1%       | 0       | 0%  |
| Spain-Murcia                   | 0%       | 25%      | 1%       | 0       | 0%  |
| Spain-Tarragona                | 0%       | 42%      | 1%       | 0       | 0%  |
| Turkey-Central                 | 4%       | 15%      | 4%       | 0       | 4%  |
| Turkey-CentralTaurusRegion     | 4%       | 10%      | 3%       | 0       | 3%  |
| Turkey-East                    | 1%       | 14%      | 1%       | 0       | 1%  |
| Turkey-West                    | 21%      | 36%      | 8%       | 1       | 8%  |

MS007

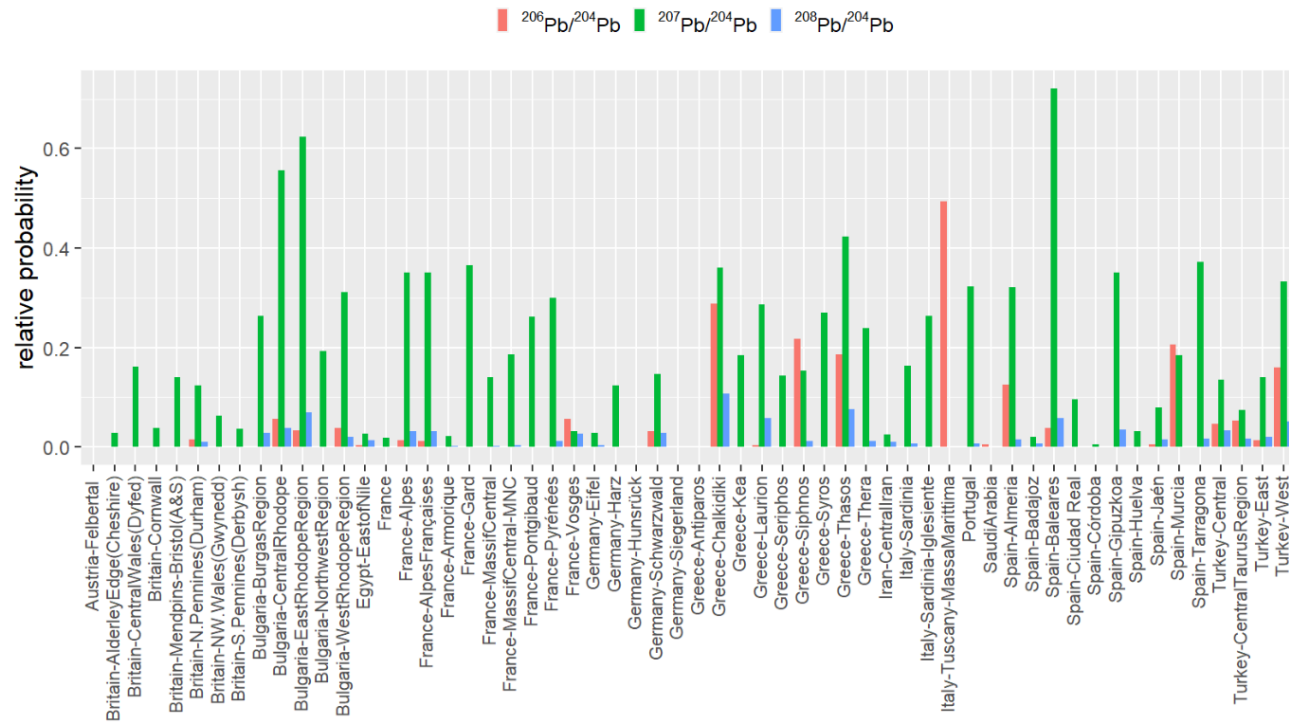

| Mining_Region                  | prob_206 | prob_207 | prob_208 | min>5%? | min |
|--------------------------------|----------|----------|----------|---------|-----|
| Austria-Felbertal              | 0%       | 0%       | 0%       | 0       | 0%  |
| Britain-AlderleyEdge(Cheshire) | 0%       | 3%       | 0%       | 0       | 0%  |
| Britain-CentralWales(Dyfed)    | 0%       | 16%      | 0%       | 0       | 0%  |
| Britain-Cornwall               | 0%       | 4%       | 0%       | 0       | 0%  |
| Britain-Mendpms-Bristol(A&S)   | 0%       | 14%      | 0%       | 0       | 0%  |
| Britain-N. Pennines(Durham)    | 2%       | 12%      | 1%       | 0       | 1%  |
| Britain-NW. Wales(Gwynedd)     | 0%       | 6%       | 0%       | 0       | 0%  |
| Britain-S. Pennines(Derbysh)   | 0%       | 4%       | 0%       | 0       | 0%  |
| Bulgaria-BurgasRegion          | 0%       | 26%      | 3%       | 0       | 0%  |
| Bulgaria-CentralRhodope        | 6%       | 56%      | 4%       | 0       | 4%  |
| Bulgaria-EastRhodopeRegion     | 3%       | 62%      | 7%       | 0       | 3%  |
| Bulgaria-NorthwestRegion       | 0%       | 19%      | 0%       | 0       | 0%  |
| Bulgaria-WestRhodopeRegion     | 4%       | 31%      | 2%       | 0       | 2%  |
| Egypt-EastofNile               | 0%       | 3%       | 1%       | 0       | 0%  |
| France                         | 0%       | 2%       | 0%       | 0       | 0%  |
| France-Alpes                   | 1%       | 35%      | 3%       | 0       | 1%  |
| France-AlpesFrançaises         | 1%       | 35%      | 3%       | 0       | 1%  |
| France-Armorique               | 0%       | 2%       | 0%       | 0       | 0%  |
| France-Gard                    | 0%       | 37%      | 0%       | 0       | 0%  |
| France-MassifCentral           | 0%       | 14%      | 0%       | 0       | 0%  |
| France-MassifCentral-MNC       | 0%       | 19%      | 0%       | 0       | 0%  |
| France-Pontgibaud              | 0%       | 26%      | 0%       | 0       | 0%  |
| France-Pyrénées                | 0%       | 30%      | 1%       | 0       | 0%  |
| France-Vosges                  | 6%       | 3%       | 3%       | 0       | 3%  |
| Germany-Eifel                  | 0%       | 3%       | 0%       | 0       | 0%  |
| Germany-Harz                   | 0%       | 12%      | 0%       | 0       | 0%  |
| Germany-Hunsrück               | 0%       | 0%       | 0%       | 0       | 0%  |
| Germany-Schwarzwald            | 3%       | 15%      | 3%       | 0       | 3%  |
| Germany-Siegerland             | 0%       | 0%       | 0%       | 0       | 0%  |
| Greece-Antiparos               | 0%       | 0%       | 0%       | 0       | 0%  |
| Greece-Chalkidiki              | 29%      | 36%      | 11%      | 1       | 11% |
| Greece-Kea                     | 0%       | 18%      | 0%       | 0       | 0%  |
| Greece-Laurion                 | 0%       | 29%      | 6%       | 0       | 0%  |
| Greece-Seriphos                | 0%       | 14%      | 0%       | 0       | 0%  |
| Greece-Siphnos                 | 22%      | 15%      | 1%       | 0       | 1%  |
| Greece-Syros                   | 0%       | 27%      | 0%       | 0       | 0%  |
| Greece-Thasos                  | 19%      | 42%      | 8%       | 1       | 8%  |
| Greece-Thera                   | 0%       | 24%      | 1%       | 0       | 0%  |
| Iran-Centrallran               | 0%       | 3%       | 1%       | 0       | 0%  |
| Italy-Sardinia                 | 0%       | 16%      | 1%       | 0       | 0%  |
| Italy-Sardinia-Iglesiente      | 0%       | 26%      | 0%       | 0       | 0%  |
| Italy-Tuscany-MassaMarittima   | 49%      | 0%       | 0%       | 0       | 0%  |
| Portugal                       | 0%       | 32%      | 1%       | 0       | 0%  |
| SaudiArabia                    | 0%       | 0%       | 0%       | 0       | 0%  |
| Spain-Almeria                  | 13%      | 32%      | 1%       | 0       | 1%  |
| Spain-Badajoz                  | 0%       | 2%       | 1%       | 0       | 0%  |
| Spain-Baleares                 | 4%       | 72%      | 6%       | 0       | 4%  |
| Spain-Ciudad Real              | 0%       | 10%      | 0%       | 0       | 0%  |
| Spain-Córdoba                  | 0%       | 1%       | 0%       | 0       | 0%  |
| Spain-Gipuzkoa                 | 0%       | 35%      | 3%       | 0       | 0%  |
| Spain-Huelva                   | 0%       | 3%       | 0%       | 0       | 0%  |
| Spain-Jaén                     | 0%       | 8%       | 1%       | 0       | 0%  |
| Spain-Murcia                   | 21%      | 18%      | 0%       | 0       | 0%  |
| Spain-Tarragona                | 0%       | 37%      | 2%       | 0       | 0%  |
| Turkey-Central                 | 5%       | 14%      | 3%       | 0       | 3%  |
| Turkey-CentralTaurusRegion     | 5%       | 7%       | 2%       | 0       | 2%  |
| Turkey-East                    | 1%       | 14%      | 2%       | 0       | 1%  |
| Turkey-West                    | 16%      | 33%      | 5%       | 1       | 5%  |

MS011

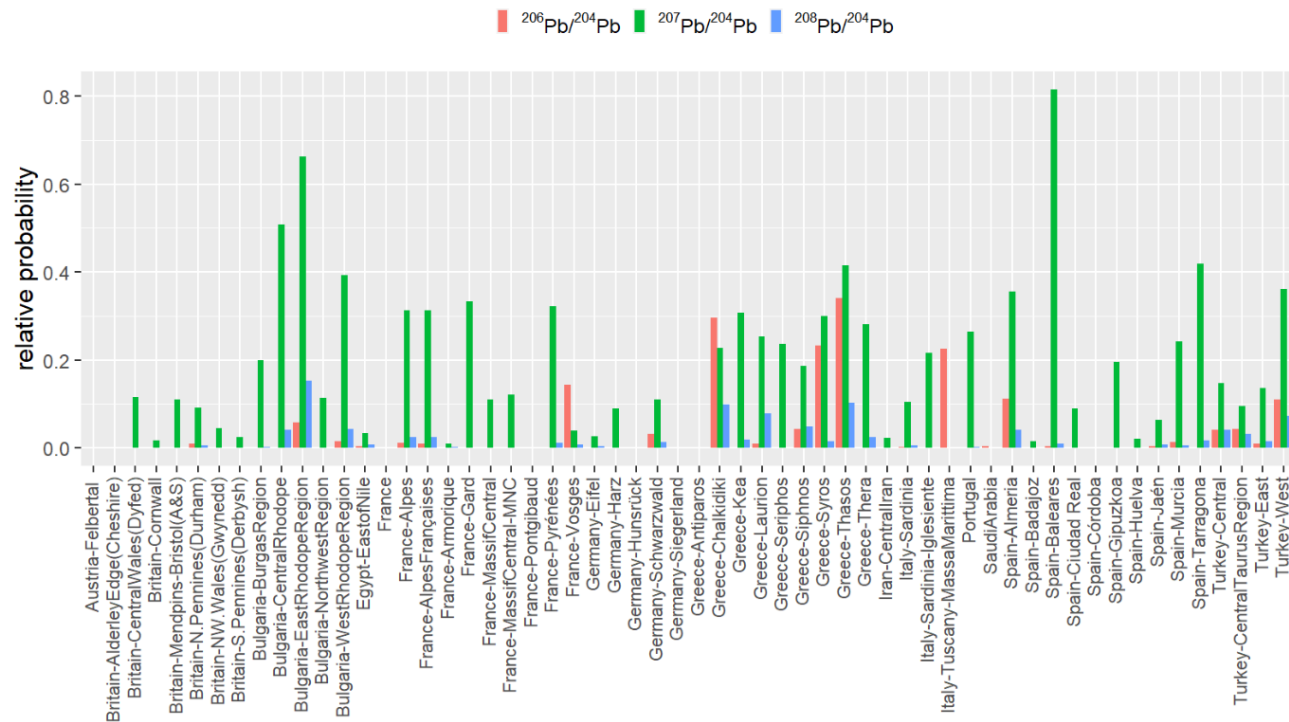

| Mining_Region                  | prob_206 | prob_207 | prob_208 | min>5%? | min |
|--------------------------------|----------|----------|----------|---------|-----|
| Austria-Felbertal              | 0%       | 0%       | 0%       | 0       | 0%  |
| Britain-AlderleyEdge(Cheshire) | 0%       | 0%       | 0%       | 0       | 0%  |
| Britain-CentralWales(Dyfed)    | 0%       | 11%      | 0%       | 0       | 0%  |
| Britain-Cornwall               | 0%       | 2%       | 0%       | 0       | 0%  |
| Britain-Mendpins-Bristol(A&S)  | 0%       | 11%      | 0%       | 0       | 0%  |
| Britain-N.Pennines(Durham)     | 1%       | 9%       | 1%       | 0       | 1%  |
| Britain-NW.Wales(Gwynedd)      | 0%       | 4%       | 0%       | 0       | 0%  |
| Britain-S.Pennines(Derbysh)    | 0%       | 2%       | 0%       | 0       | 0%  |
| Bulgaria-BurgasRegion          | 0%       | 20%      | 0%       | 0       | 0%  |
| Bulgaria-CentralRhodope        | 0%       | 51%      | 4%       | 0       | 0%  |
| Bulgaria-EastRhodopeRegion     | 6%       | 66%      | 15%      | 1       | 6%  |
| Bulgaria-NorthwestRegion       | 0%       | 11%      | 0%       | 0       | 0%  |
| Bulgaria-WestRhodopeRegion     | 1%       | 39%      | 4%       | 0       | 1%  |
| Egypt-EastofNile               | 0%       | 3%       | 1%       | 0       | 0%  |
| France                         | 0%       | 0%       | 0%       | 0       | 0%  |
| France-Alpes                   | 1%       | 31%      | 2%       | 0       | 1%  |
| France-AlpesFrançaises         | 1%       | 31%      | 2%       | 0       | 1%  |
| France-Armorique               | 0%       | 1%       | 0%       | 0       | 0%  |
| France-Gard                    | 0%       | 33%      | 0%       | 0       | 0%  |
| France-MassifCentral           | 0%       | 11%      | 0%       | 0       | 0%  |
| France-MassifCentral-MNC       | 0%       | 12%      | 0%       | 0       | 0%  |
| France-Pontgibaud              | 0%       | 0%       | 0%       | 0       | 0%  |
| France-Pyrénées                | 0%       | 32%      | 1%       | 0       | 0%  |
| France-Vosges                  | 14%      | 4%       | 1%       | 0       | 1%  |
| Germany-Eifel                  | 0%       | 3%       | 0%       | 0       | 0%  |
| Germany-Harz                   | 0%       | 9%       | 0%       | 0       | 0%  |
| Germany-Hunsrück               | 0%       | 0%       | 0%       | 0       | 0%  |
| Germany-Schwarzwald            | 3%       | 11%      | 1%       | 0       | 1%  |
| Germany-Siegerland             | 0%       | 0%       | 0%       | 0       | 0%  |
| Greece-Antiparos               | 0%       | 0%       | 0%       | 0       | 0%  |
| Greece-Chalkidiki              | 30%      | 23%      | 10%      | 1       | 10% |
| Greece-Kea                     | 0%       | 31%      | 2%       | 0       | 0%  |
| Greece-Laurion                 | 1%       | 25%      | 8%       | 0       | 1%  |
| Greece-Seriphos                | 0%       | 24%      | 0%       | 0       | 0%  |
| Greece-Siphnos                 | 4%       | 19%      | 5%       | 0       | 4%  |
| Greece-Syros                   | 23%      | 30%      | 1%       | 0       | 1%  |
| Greece-Thasos                  | 34%      | 42%      | 10%      | 1       | 10% |
| Greece-Thera                   | 0%       | 28%      | 3%       | 0       | 0%  |
| Iran-Centrallran               | 0%       | 2%       | 0%       | 0       | 0%  |
| Italy-Sardinia                 | 0%       | 10%      | 1%       | 0       | 0%  |
| Italy-Sardinia-Iglesiente      | 0%       | 22%      | 0%       | 0       | 0%  |
| Italy-Tuscany-MassaMarittima   | 23%      | 0%       | 0%       | 0       | 0%  |
| Portugal                       | 0%       | 26%      | 0%       | 0       | 0%  |
| SaudiArabia                    | 0%       | 0%       | 0%       | 0       | 0%  |
| Spain-Almeria                  | 11%      | 36%      | 4%       | 0       | 4%  |
| Spain-Badajoz                  | 0%       | 1%       | 0%       | 0       | 0%  |
| Spain-Baleares                 | 0%       | 82%      | 1%       | 0       | 0%  |
| Spain-Ciudad Real              | 0%       | 9%       | 0%       | 0       | 0%  |
| Spain-Córdoba                  | 0%       | 0%       | 0%       | 0       | 0%  |
| Spain-Gipuzkoa                 | 0%       | 20%      | 0%       | 0       | 0%  |
| Spain-Huelva                   | 0%       | 2%       | 0%       | 0       | 0%  |
| Spain-Jaén                     | 0%       | 6%       | 1%       | 0       | 0%  |
| Spain-Murcia                   | 1%       | 24%      | 0%       | 0       | 0%  |
| Spain-Tarragona                | 0%       | 42%      | 2%       | 0       | 0%  |
| Turkey-Central                 | 4%       | 15%      | 4%       | 0       | 4%  |
| Turkey-CentralTaurusRegion     | 4%       | 10%      | 3%       | 0       | 3%  |
| Turkey-East                    | 1%       | 14%      | 1%       | 0       | 1%  |
| Turkey-West                    | 11%      | 36%      | 7%       | 1       | 7%  |



MS015

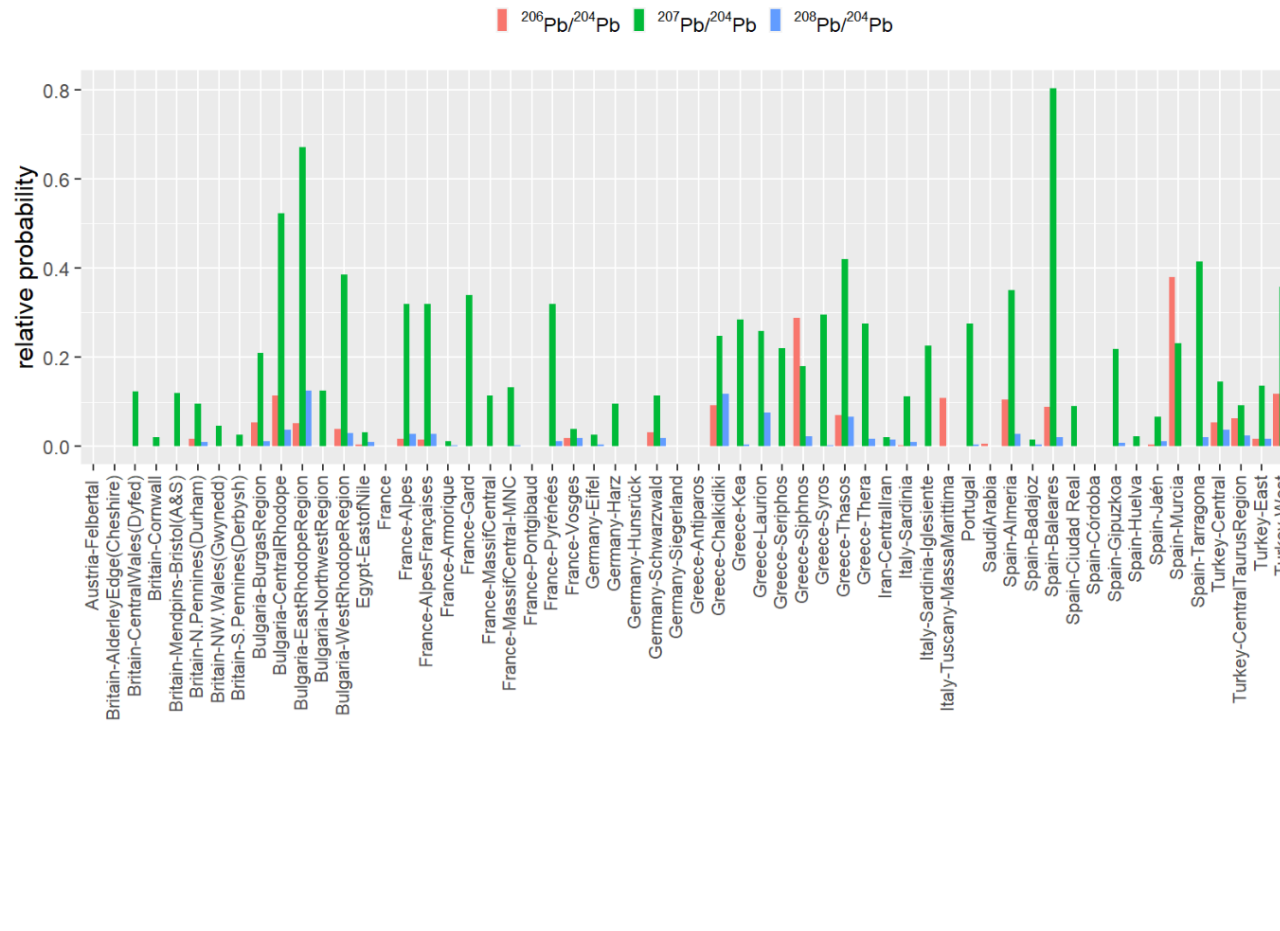

| Mining_Region                  | prob_206 | prob_207 | prob_208 | min>5%? | min |
|--------------------------------|----------|----------|----------|---------|-----|
| Austria-Felbertal              | 0%       | 0%       | 0%       | 0       | 0%  |
| Britain-AlderleyEdge(Cheshire) | 0%       | 0%       | 0%       | 0       | 0%  |
| Britain-CentralWales(Dyfed)    | 0%       | 12%      | 0%       | 0       | 0%  |
| Britain-Cornwall               | 0%       | 2%       | 0%       | 0       | 0%  |
| Britain-Mendpins-Bristol(A&S)  | 0%       | 12%      | 0%       | 0       | 0%  |
| Britain-N.Pennines(Durham)     | 2%       | 10%      | 1%       | 0       | 1%  |
| Britain-NW.Wales(Gwynedd)      | 0%       | 5%       | 0%       | 0       | 0%  |
| Britain-S.Pennines(Derbysh)    | 0%       | 3%       | 0%       | 0       | 0%  |
| Bulgaria-BurgasRegion          | 5%       | 21%      | 1%       | 0       | 1%  |
| Bulgaria-CentralRhodope        | 11%      | 52%      | 4%       | 0       | 4%  |
| Bulgaria-EastRhodopeRegion     | 5%       | 67%      | 12%      | 1       | 5%  |
| Bulgaria-NorthwestRegion       | 0%       | 13%      | 0%       | 0       | 0%  |
| Bulgaria-WestRhodopeRegion     | 4%       | 39%      | 3%       | 0       | 3%  |
| Egypt-EastofNile               | 0%       | 3%       | 1%       | 0       | 0%  |
| France                         | 0%       | 0%       | 0%       | 0       | 0%  |
| France-Alpes                   | 2%       | 32%      | 3%       | 0       | 2%  |
| France-AlpesFrançaises         | 1%       | 32%      | 3%       | 0       | 1%  |
| France-Armorique               | 0%       | 1%       | 0%       | 0       | 0%  |
| France-Gard                    | 0%       | 34%      | 0%       | 0       | 0%  |
| France-MassifCentral           | 0%       | 11%      | 0%       | 0       | 0%  |
| France-MassifCentral-MNC       | 0%       | 13%      | 0%       | 0       | 0%  |
| France-Pontgibaud              | 0%       | 0%       | 0%       | 0       | 0%  |
| France-Pyrénées                | 0%       | 32%      | 1%       | 0       | 0%  |
| France-Vosges                  | 2%       | 4%       | 2%       | 0       | 2%  |
| Germany-Eifel                  | 0%       | 3%       | 0%       | 0       | 0%  |
| Germany-Harz                   | 0%       | 10%      | 0%       | 0       | 0%  |
| Germany-Hunsrück               | 0%       | 0%       | 0%       | 0       | 0%  |
| Germany-Schwarzwald            | 3%       | 11%      | 2%       | 0       | 2%  |
| Germany-Siegerland             | 0%       | 0%       | 0%       | 0       | 0%  |
| Greece-Antiparos               | 0%       | 0%       | 0%       | 0       | 0%  |
| Greece-Chalkidiki              | 9%       | 25%      | 12%      | 1       | 9%  |
| Greece-Kea                     | 0%       | 28%      | 0%       | 0       | 0%  |
| Greece-Laurion                 | 0%       | 26%      | 8%       | 0       | 0%  |
| Greece-Seriphos                | 0%       | 22%      | 0%       | 0       | 0%  |
| Greece-Siphnos                 | 29%      | 18%      | 2%       | 0       | 2%  |
| Greece-Syros                   | 0%       | 30%      | 0%       | 0       | 0%  |
| Greece-Thasos                  | 7%       | 42%      | 7%       | 1       | 7%  |
| Greece-Thera                   | 0%       | 27%      | 2%       | 0       | 0%  |
| Iran-Centrallran               | 0%       | 2%       | 1%       | 0       | 0%  |
| Italy-Sardinia                 | 0%       | 11%      | 1%       | 0       | 0%  |
| Italy-Sardinia-Iglesiente      | 0%       | 22%      | 0%       | 0       | 0%  |
| Italy-Tuscany-MassaMarittima   | 11%      | 0%       | 0%       | 0       | 0%  |
| Portugal                       | 0%       | 28%      | 0%       | 0       | 0%  |
| SaudiArabia                    | 1%       | 0%       | 0%       | 0       | 0%  |
| Spain-Almeria                  | 10%      | 35%      | 3%       | 0       | 3%  |
| Spain-Badajoz                  | 0%       | 1%       | 0%       | 0       | 0%  |
| Spain-Baleares                 | 9%       | 80%      | 2%       | 0       | 2%  |
| Spain-Ciudad Real              | 0%       | 9%       | 0%       | 0       | 0%  |
| Spain-Córdoba                  | 0%       | 0%       | 0%       | 0       | 0%  |
| Spain-Gipuzkoa                 | 0%       | 22%      | 1%       | 0       | 0%  |
| Spain-Huelva                   | 0%       | 2%       | 0%       | 0       | 0%  |
| Spain-Jaén                     | 0%       | 7%       | 1%       | 0       | 0%  |
| Spain-Murcia                   | 38%      | 23%      | 0%       | 0       | 0%  |
| Spain-Tarragona                | 0%       | 41%      | 2%       | 0       | 0%  |
| Turkey-Central                 | 5%       | 14%      | 4%       | 0       | 4%  |
| Turkey-CentralTaurusRegion     | 6%       | 9%       | 2%       | 0       | 2%  |
| Turkey-East                    | 2%       | 14%      | 2%       | 0       | 2%  |
| Turkey-West                    | 12%      | 36%      | 6%       | 1       | 6%  |

c. Laurion

GE056

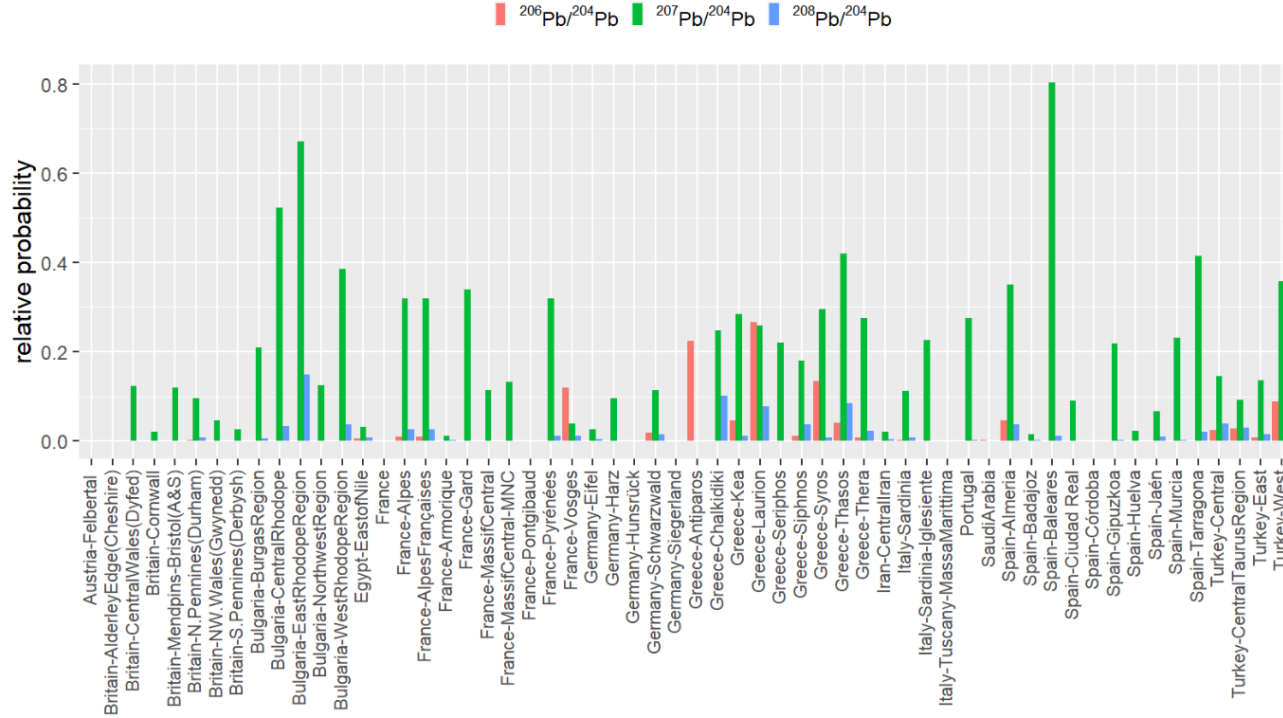

| Mining_Region                  | prob_206 | prob_207 | prob_208 | min>5%? | min |
|--------------------------------|----------|----------|----------|---------|-----|
| Austria-Felbertal              | 0%       | 0%       | 0%       | 0       | 0%  |
| Britain-AlderleyEdge(Cheshire) | 0%       | 0%       | 0%       | 0       | 0%  |
| Britain-CentralWales(Dyfed)    | 0%       | 12%      | 0%       | 0       | 0%  |
| Britain-Cornwall               | 0%       | 2%       | 0%       | 0       | 0%  |
| Britain-Mendpins-Bristol(A&S)  | 0%       | 12%      | 0%       | 0       | 0%  |
| Britain-N.Pennines(Durham)     | 0%       | 10%      | 1%       | 0       | 0%  |
| Britain-NW.Wales(Gwynedd)      | 0%       | 5%       | 0%       | 0       | 0%  |
| Britain-S.Pennines(Derbysh)    | 0%       | 3%       | 0%       | 0       | 0%  |
| Bulgaria-BurgasRegion          | 0%       | 21%      | 1%       | 0       | 0%  |
| Bulgaria-CentralRhodope        | 0%       | 52%      | 3%       | 0       | 0%  |
| Bulgaria-EastRhodopeRegion     | 0%       | 67%      | 15%      | 0       | 0%  |
| Bulgaria-NorthwestRegion       | 0%       | 13%      | 0%       | 0       | 0%  |
| Bulgaria-WestRhodopeRegion     | 0%       | 39%      | 4%       | 0       | 0%  |
| Egypt-EastofNile               | 0%       | 3%       | 1%       | 0       | 0%  |
| France                         | 0%       | 0%       | 0%       | 0       | 0%  |
| France-Alpes                   | 1%       | 32%      | 3%       | 0       | 1%  |
| France-AlpesFrançaises         | 1%       | 32%      | 3%       | 0       | 1%  |
| France-Armorique               | 0%       | 1%       | 0%       | 0       | 0%  |
| France-Gard                    | 0%       | 34%      | 0%       | 0       | 0%  |
| France-MassifCentral           | 0%       | 11%      | 0%       | 0       | 0%  |
| France-MassifCentral-MNC       | 0%       | 13%      | 0%       | 0       | 0%  |
| France-Pontgibaud              | 0%       | 0%       | 0%       | 0       | 0%  |
| France-Pyrénées                | 0%       | 32%      | 1%       | 0       | 0%  |
| France-Vosges                  | 12%      | 4%       | 1%       | 0       | 1%  |
| Germany-Eifel                  | 0%       | 3%       | 0%       | 0       | 0%  |
| Germany-Harz                   | 0%       | 10%      | 0%       | 0       | 0%  |
| Germany-Hunsrück               | 0%       | 0%       | 0%       | 0       | 0%  |
| Germany-Schwarzwald            | 2%       | 11%      | 1%       | 0       | 1%  |
| Germany-Siegerland             | 0%       | 0%       | 0%       | 0       | 0%  |
| Greece-Antiparos               | 22%      | 0%       | 0%       | 0       | 0%  |
| Greece-Chalkidiki              | 0%       | 25%      | 10%      | 0       | 0%  |
| Greece-Kea                     | 5%       | 28%      | 1%       | 0       | 1%  |
| Greece-Laurion                 | 27%      | 26%      | 8%       | 1       | 8%  |
| Greece-Seriphos                | 0%       | 22%      | 0%       | 0       | 0%  |
| Greece-Siphnos                 | 1%       | 18%      | 4%       | 0       | 1%  |
| Greece-Syros                   | 13%      | 30%      | 1%       | 0       | 1%  |
| Greece-Thasos                  | 4%       | 42%      | 8%       | 0       | 4%  |
| Greece-Thera                   | 1%       | 27%      | 2%       | 0       | 1%  |
| Iran-CentralIran               | 0%       | 2%       | 0%       | 0       | 0%  |
| Italy-Sardinia-Iglesiente      | 0%       | 11%      | 1%       | 0       | 0%  |
| Italy-Tuscany-MassaMarittima   | 0%       | 22%      | 0%       | 0       | 0%  |
| Portugal                       | 0%       | 0%       | 0%       | 0       | 0%  |
| SaudiArabia                    | 0%       | 28%      | 0%       | 0       | 0%  |
| Spain-Almeria                  | 0%       | 0%       | 0%       | 0       | 0%  |
| Spain-Badajoz                  | 5%       | 35%      | 4%       | 0       | 4%  |
| Spain-Baleares                 | 0%       | 1%       | 0%       | 0       | 0%  |
| Spain-Ciudad Real              | 0%       | 80%      | 1%       | 0       | 0%  |
| Spain-Córdoba                  | 0%       | 9%       | 0%       | 0       | 0%  |
| Spain-Gipuzkoa                 | 0%       | 0%       | 0%       | 0       | 0%  |
| Spain-Huelva                   | 0%       | 22%      | 0%       | 0       | 0%  |
| Spain-Jaén                     | 0%       | 2%       | 0%       | 0       | 0%  |
| Spain-Murcia                   | 0%       | 7%       | 1%       | 0       | 0%  |
| Spain-Tarragona                | 0%       | 23%      | 0%       | 0       | 0%  |
| Turkey-Central                 | 0%       | 41%      | 2%       | 0       | 0%  |
| Turkey-CentralTaurusRegion     | 2%       | 14%      | 4%       | 0       | 2%  |
| Turkey-East                    | 3%       | 9%       | 3%       | 0       | 3%  |
| Turkey-West                    | 1%       | 14%      | 2%       | 0       | 1%  |
| Turkey-West                    | 9%       | 36%      | 7%       | 1       | 7%  |

GE057

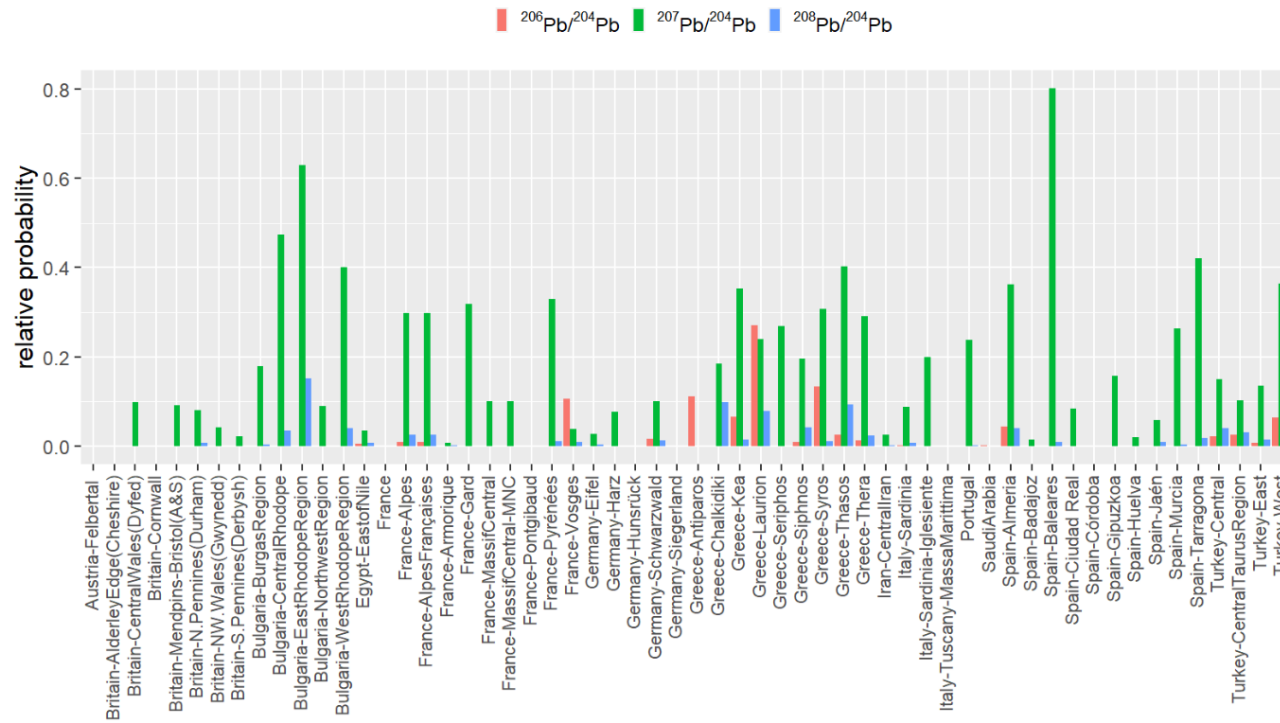

| Mining_Region                  | prob_206 | prob_207 | prob_208 | min>5%? | min |
|--------------------------------|----------|----------|----------|---------|-----|
| Austria-Felbertal              | 0%       | 0%       | 0%       | 0       | 0%  |
| Britain-AlderleyEdge(Cheshire) | 0%       | 0%       | 0%       | 0       | 0%  |
| Britain-CentralWales(Dyfed)    | 0%       | 10%      | 0%       | 0       | 0%  |
| Britain-Cornwall               | 0%       | 0%       | 0%       | 0       | 0%  |
| Britain-Mendpins-Bristol(A&S)  | 0%       | 9%       | 0%       | 0       | 0%  |
| Britain-N.Pennines(Durham)     | 0%       | 8%       | 1%       | 0       | 0%  |
| Britain-NW.Wales(Gwynedd)      | 0%       | 4%       | 0%       | 0       | 0%  |
| Britain-S.Pennines(Derbysh)    | 0%       | 2%       | 0%       | 0       | 0%  |
| Bulgaria-BurgasRegion          | 0%       | 18%      | 0%       | 0       | 0%  |
| Bulgaria-CentralRhodope        | 0%       | 47%      | 4%       | 0       | 0%  |
| Bulgaria-EastRhodopeRegion     | 0%       | 63%      | 15%      | 0       | 0%  |
| Bulgaria-NorthwestRegion       | 0%       | 9%       | 0%       | 0       | 0%  |
| Bulgaria-WestRhodopeRegion     | 0%       | 40%      | 4%       | 0       | 0%  |
| Egypt-EastofNile               | 1%       | 4%       | 1%       | 0       | 1%  |
| France                         | 0%       | 0%       | 0%       | 0       | 0%  |
| France-Alpes                   | 1%       | 30%      | 3%       | 0       | 1%  |
| France-AlpesFrançaises         | 1%       | 30%      | 3%       | 0       | 1%  |
| France-Armorique               | 0%       | 1%       | 0%       | 0       | 0%  |
| France-Gard                    | 0%       | 32%      | 0%       | 0       | 0%  |
| France-MassifCentral           | 0%       | 10%      | 0%       | 0       | 0%  |
| France-MassifCentral-MNC       | 0%       | 10%      | 0%       | 0       | 0%  |
| France-Pontgibaud              | 0%       | 0%       | 0%       | 0       | 0%  |
| France-Pyrénées                | 0%       | 33%      | 1%       | 0       | 0%  |
| France-Vosges                  | 11%      | 4%       | 1%       | 0       | 1%  |
| Germany-Eifel                  | 0%       | 3%       | 0%       | 0       | 0%  |
| Germany-Harz                   | 0%       | 8%       | 0%       | 0       | 0%  |
| Germany-Hunsrück               | 0%       | 0%       | 0%       | 0       | 0%  |
| Germany-Schwarzwald            | 2%       | 10%      | 1%       | 0       | 1%  |
| Germany-Siegerland             | 0%       | 0%       | 0%       | 0       | 0%  |
| Greece-Antiparos               | 11%      | 0%       | 0%       | 0       | 0%  |
| Greece-Chalkidiki              | 0%       | 19%      | 10%      | 0       | 0%  |
| Greece-Kea                     | 7%       | 35%      | 1%       | 0       | 1%  |
| Greece-Laurion                 | 27%      | 24%      | 8%       | 1       | 8%  |
| Greece-Seriphos                | 0%       | 27%      | 0%       | 0       | 0%  |
| Greece-Siphnos                 | 1%       | 20%      | 4%       | 0       | 1%  |
| Greece-Syros                   | 13%      | 31%      | 1%       | 0       | 1%  |
| Greece-Thasos                  | 3%       | 40%      | 9%       | 0       | 3%  |
| Greece-Thera                   | 1%       | 29%      | 2%       | 0       | 1%  |
| Iran-Centrallran               | 0%       | 3%       | 0%       | 0       | 0%  |
| Italy-Sardinia                 | 0%       | 9%       | 1%       | 0       | 0%  |
| Italy-Sardinia-Iglesiente      | 0%       | 20%      | 0%       | 0       | 0%  |
| Italy-Tuscany-MassaMarittima   | 0%       | 0%       | 0%       | 0       | 0%  |
| Portugal                       | 0%       | 24%      | 0%       | 0       | 0%  |
| SaudiArabia                    | 0%       | 0%       | 0%       | 0       | 0%  |
| Spain-Almeria                  | 4%       | 36%      | 4%       | 0       | 4%  |
| Spain-Badajoz                  | 0%       | 1%       | 0%       | 0       | 0%  |
| Spain-Baleares                 | 0%       | 80%      | 1%       | 0       | 0%  |
| Spain-Ciudad Real              | 0%       | 8%       | 0%       | 0       | 0%  |
| Spain-Córdoba                  | 0%       | 0%       | 0%       | 0       | 0%  |
| Spain-Gipuzkoa                 | 0%       | 16%      | 0%       | 0       | 0%  |
| Spain-Huelva                   | 0%       | 2%       | 0%       | 0       | 0%  |
| Spain-Jaén                     | 0%       | 6%       | 1%       | 0       | 0%  |
| Spain-Murcia                   | 0%       | 26%      | 0%       | 0       | 0%  |
| Spain-Tarragona                | 0%       | 42%      | 2%       | 0       | 0%  |
| Turkey-Central                 | 2%       | 15%      | 4%       | 0       | 2%  |
| Turkey-CentralTaurusRegion     | 3%       | 10%      | 3%       | 0       | 3%  |
| Turkey-East                    | 1%       | 13%      | 1%       | 0       | 1%  |
| Turkey-West                    | 6%       | 36%      | 7%       | 1       | 6%  |

MS004

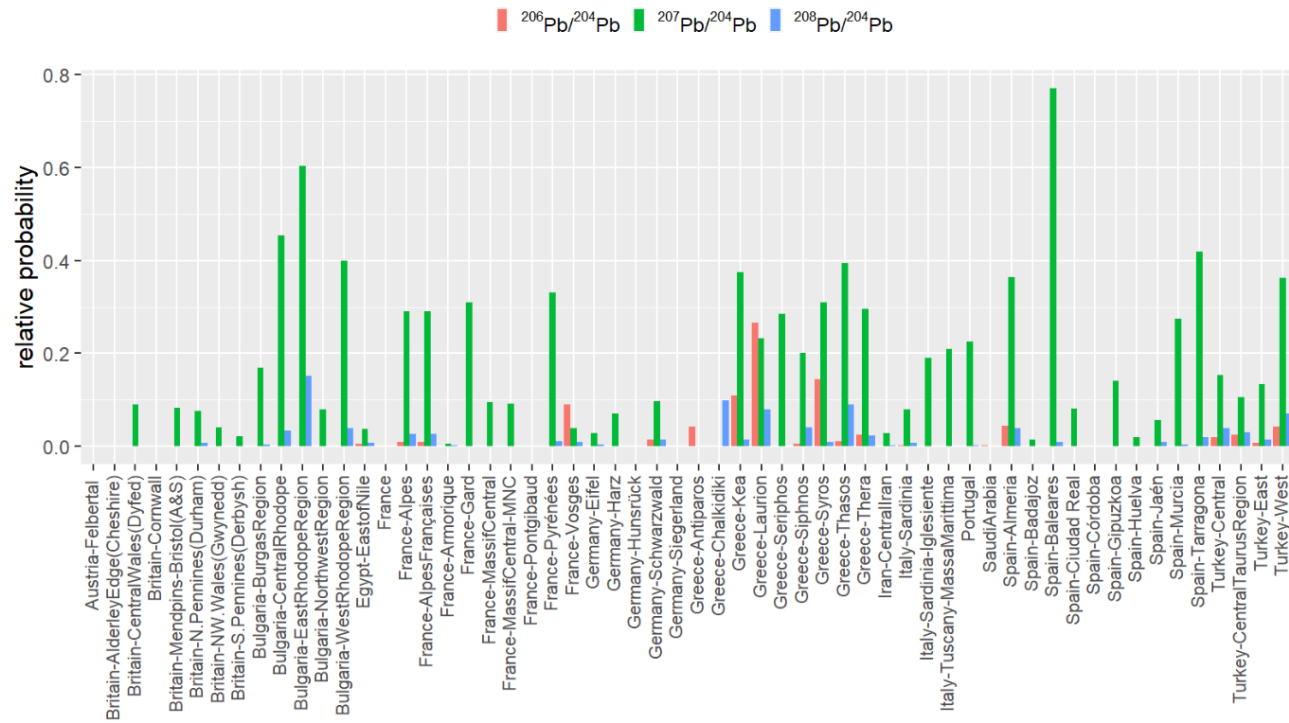

| Mining_Region                  | prob_206 | prob_207 | prob_208 | min>5%? | min |
|--------------------------------|----------|----------|----------|---------|-----|
| Austria-Felbertal              | 0%       | 0%       | 0%       | 0       | 0%  |
| Britain-AlderleyEdge(Cheshire) | 0%       | 0%       | 0%       | 0       | 0%  |
| Britain-CentralWales(Dyfed)    | 0%       | 9%       | 0%       | 0       | 0%  |
| Britain-Cornwall               | 0%       | 0%       | 0%       | 0       | 0%  |
| Britain-Mendips-Bristol(A&S)   | 0%       | 8%       | 0%       | 0       | 0%  |
| Britain-N.Pennines(Durham)     | 0%       | 8%       | 1%       | 0       | 0%  |
| Britain-NW.Wales(Gwynedd)      | 0%       | 4%       | 0%       | 0       | 0%  |
| Britain-S.Pennines(Derbysh)    | 0%       | 2%       | 0%       | 0       | 0%  |
| Bulgaria-BurgasRegion          | 0%       | 17%      | 0%       | 0       | 0%  |
| Bulgaria-CentralRhodope        | 0%       | 45%      | 3%       | 0       | 0%  |
| Bulgaria-EastRhodopeRegion     | 0%       | 60%      | 15%      | 0       | 0%  |
| Bulgaria-NorthwestRegion       | 0%       | 8%       | 0%       | 0       | 0%  |
| Bulgaria-WestRhodopeRegion     | 0%       | 40%      | 4%       | 0       | 0%  |
| Egypt-EastofNile               | 1%       | 4%       | 1%       | 0       | 1%  |
| France                         | 0%       | 0%       | 0%       | 0       | 0%  |
| France-Alpes                   | 1%       | 29%      | 3%       | 0       | 1%  |
| France-AlpesFrançaises         | 1%       | 29%      | 3%       | 0       | 1%  |
| France-Armorique               | 0%       | 1%       | 0%       | 0       | 0%  |
| France-Gard                    | 0%       | 31%      | 0%       | 0       | 0%  |
| France-MassifCentral           | 0%       | 10%      | 0%       | 0       | 0%  |
| France-MassifCentral-MNC       | 0%       | 9%       | 0%       | 0       | 0%  |
| France-Pontgibaud              | 0%       | 0%       | 0%       | 0       | 0%  |
| France-Pyrénées                | 0%       | 33%      | 1%       | 0       | 0%  |
| France-Vosges                  | 9%       | 4%       | 1%       | 0       | 1%  |
| Germany-Eifel                  | 0%       | 3%       | 0%       | 0       | 0%  |
| Germany-Harz                   | 0%       | 7%       | 0%       | 0       | 0%  |
| Germany-Hunsrück               | 0%       | 0%       | 0%       | 0       | 0%  |
| Germany-Schwarzwald            | 1%       | 10%      | 1%       | 0       | 1%  |
| Germany-Siegerland             | 0%       | 0%       | 0%       | 0       | 0%  |
| Greece-Antiparos               | 4%       | 0%       | 0%       | 0       | 0%  |
| Greece-Chalkidiki              | 0%       | 0%       | 10%      | 0       | 0%  |
| Greece-Kea                     | 11%      | 37%      | 1%       | 0       | 1%  |
| Greece-Laurion                 | 26%      | 23%      | 8%       | 1       | 8%  |
| Greece-Seriphos                | 0%       | 28%      | 0%       | 0       | 0%  |
| Greece-Siphos                  | 1%       | 20%      | 4%       | 0       | 1%  |
| Greece-Syros                   | 14%      | 31%      | 1%       | 0       | 1%  |
| Greece-Thasos                  | 1%       | 39%      | 9%       | 0       | 1%  |
| Greece-Thera                   | 2%       | 30%      | 2%       | 0       | 2%  |
| Iran-Centrallran               | 0%       | 3%       | 0%       | 0       | 0%  |
| Italy-Sardinia                 | 0%       | 8%       | 1%       | 0       | 0%  |
| Italy-Sardinia-Iglesiente      | 0%       | 19%      | 0%       | 0       | 0%  |
| Italy-Tuscany-MassaMarittima   | 0%       | 21%      | 0%       | 0       | 0%  |
| Portugal                       | 0%       | 22%      | 0%       | 0       | 0%  |
| SaudiArabia                    | 0%       | 0%       | 0%       | 0       | 0%  |
| Spain-Almeria                  | 4%       | 36%      | 4%       | 0       | 4%  |
| Spain-Badajoz                  | 0%       | 1%       | 0%       | 0       | 0%  |
| Spain-Baleares                 | 0%       | 77%      | 1%       | 0       | 0%  |
| Spain-Ciudad Real              | 0%       | 8%       | 0%       | 0       | 0%  |
| Spain-Córdoba                  | 0%       | 0%       | 0%       | 0       | 0%  |
| Spain-Gipuzkoa                 | 0%       | 14%      | 0%       | 0       | 0%  |
| Spain-Huelva                   | 0%       | 2%       | 0%       | 0       | 0%  |
| Spain-Jaén                     | 0%       | 6%       | 1%       | 0       | 0%  |
| Spain-Murcia                   | 0%       | 28%      | 0%       | 0       | 0%  |
| Spain-Tarragona                | 0%       | 42%      | 2%       | 0       | 0%  |
| Turkey-Central                 | 2%       | 15%      | 4%       | 0       | 2%  |
| Turkey-CentralTaurusRegion     | 2%       | 11%      | 3%       | 0       | 2%  |
| Turkey-East                    | 1%       | 13%      | 2%       | 0       | 1%  |
| Turkey-West                    | 4%       | 36%      | 7%       | 0       | 4%  |

MS008

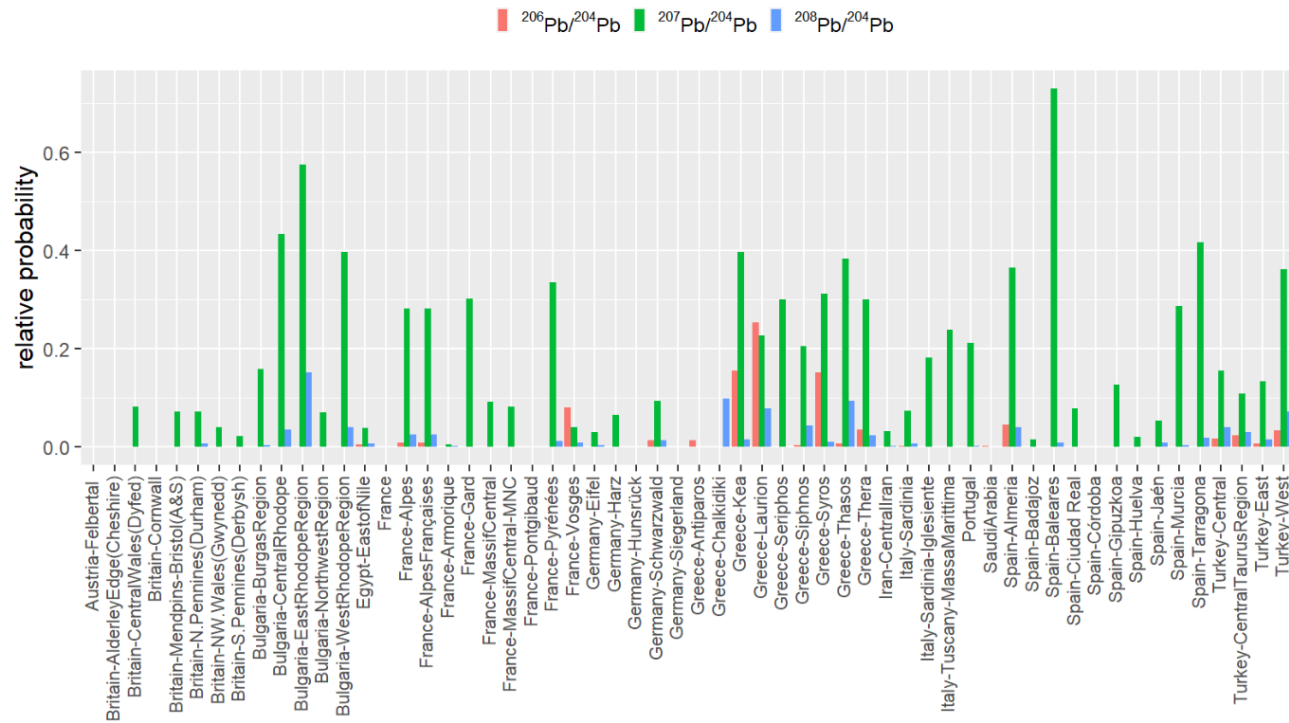

| Mining_Region                  | prob_206 | prob_207 | prob_208 | min>5%? | min |
|--------------------------------|----------|----------|----------|---------|-----|
| Austria-Felbertal              | 0%       | 0%       | 0%       | 0       | 0%  |
| Britain-AlderleyEdge(Cheshire) | 0%       | 0%       | 0%       | 0       | 0%  |
| Britain-CentralWales(Dyfed)    | 0%       | 8%       | 0%       | 0       | 0%  |
| Britain-Cornwall               | 0%       | 0%       | 0%       | 0       | 0%  |
| Britain-Mendpins-Bristol(A&S)  | 0%       | 7%       | 0%       | 0       | 0%  |
| Britain-N.Pennines(Durham)     | 0%       | 7%       | 1%       | 0       | 0%  |
| Britain-NW.Wales(Gwynedd)      | 0%       | 4%       | 0%       | 0       | 0%  |
| Britain-S.Pennines(Derbysh)    | 0%       | 2%       | 0%       | 0       | 0%  |
| Bulgaria-BurgasRegion          | 0%       | 16%      | 0%       | 0       | 0%  |
| Bulgaria-CentralRhodope        | 0%       | 43%      | 4%       | 0       | 0%  |
| Bulgaria-EastRhodopeRegion     | 0%       | 58%      | 15%      | 0       | 0%  |
| Bulgaria-NorthwestRegion       | 0%       | 7%       | 0%       | 0       | 0%  |
| Bulgaria-WestRhodopeRegion     | 0%       | 40%      | 4%       | 0       | 0%  |
| Egypt-EastofNile               | 1%       | 4%       | 1%       | 0       | 1%  |
| France                         | 0%       | 0%       | 0%       | 0       | 0%  |
| France-Alpes                   | 1%       | 28%      | 3%       | 0       | 1%  |
| France-AlpesFrançaises         | 1%       | 28%      | 3%       | 0       | 1%  |
| France-Armorique               | 0%       | 0%       | 0%       | 0       | 0%  |
| France-Gard                    | 0%       | 30%      | 0%       | 0       | 0%  |
| France-MassifCentral           | 0%       | 9%       | 0%       | 0       | 0%  |
| France-MassifCentral-MNC       | 0%       | 8%       | 0%       | 0       | 0%  |
| France-Pontgibaud              | 0%       | 0%       | 0%       | 0       | 0%  |
| France-Pyrénées                | 0%       | 33%      | 1%       | 0       | 0%  |
| France-Vosges                  | 8%       | 4%       | 1%       | 0       | 1%  |
| Germany-Eifel                  | 0%       | 3%       | 0%       | 0       | 0%  |
| Germany-Harz                   | 0%       | 6%       | 0%       | 0       | 0%  |
| Germany-Hunsrück               | 0%       | 0%       | 0%       | 0       | 0%  |
| Germany-Schwarzwald            | 1%       | 9%       | 1%       | 0       | 1%  |
| Germany-Siegerland             | 0%       | 0%       | 0%       | 0       | 0%  |
| Greece-Antiparos               | 1%       | 0%       | 0%       | 0       | 0%  |
| Greece-Chalkidiki              | 0%       | 0%       | 10%      | 0       | 0%  |
| Greece-Kea                     | 15%      | 40%      | 1%       | 0       | 1%  |
| Greece-Laurion                 | 25%      | 23%      | 8%       | 1       | 8%  |
| Greece-Seriphos                | 0%       | 30%      | 0%       | 0       | 0%  |
| Greece-Siphnos                 | 0%       | 21%      | 4%       | 0       | 0%  |
| Greece-Syros                   | 15%      | 31%      | 1%       | 0       | 1%  |
| Greece-Thasos                  | 1%       | 38%      | 9%       | 0       | 1%  |
| Greece-Thera                   | 4%       | 30%      | 2%       | 0       | 2%  |
| Iran-CentralIran               | 0%       | 3%       | 0%       | 0       | 0%  |
| Italy-Sardinia                 | 0%       | 7%       | 1%       | 0       | 0%  |
| Italy-Sardinia-Iglesiente      | 0%       | 18%      | 0%       | 0       | 0%  |
| Italy-Tuscany-MassaMarittima   | 0%       | 24%      | 0%       | 0       | 0%  |
| Portugal                       | 0%       | 21%      | 0%       | 0       | 0%  |
| SaudiArabia                    | 0%       | 0%       | 0%       | 0       | 0%  |
| Spain-Almeria                  | 4%       | 36%      | 4%       | 0       | 4%  |
| Spain-Badajoz                  | 0%       | 1%       | 0%       | 0       | 0%  |
| Spain-Baleares                 | 0%       | 73%      | 1%       | 0       | 0%  |
| Spain-Ciudad Real              | 0%       | 8%       | 0%       | 0       | 0%  |
| Spain-Córdoba                  | 0%       | 0%       | 0%       | 0       | 0%  |
| Spain-Gipuzkoa                 | 0%       | 13%      | 0%       | 0       | 0%  |
| Spain-Huelva                   | 0%       | 2%       | 0%       | 0       | 0%  |
| Spain-Jaén                     | 0%       | 5%       | 1%       | 0       | 0%  |
| Spain-Murcia                   | 0%       | 29%      | 0%       | 0       | 0%  |
| Spain-Tarragona                | 0%       | 42%      | 2%       | 0       | 0%  |
| Turkey-Central                 | 2%       | 15%      | 4%       | 0       | 2%  |
| Turkey-CentralTaurusRegion     | 2%       | 11%      | 3%       | 0       | 2%  |
| Turkey-East                    | 1%       | 13%      | 1%       | 0       | 1%  |
| Turkey-West                    | 3%       | 36%      | 7%       | 0       | 3%  |



TB038

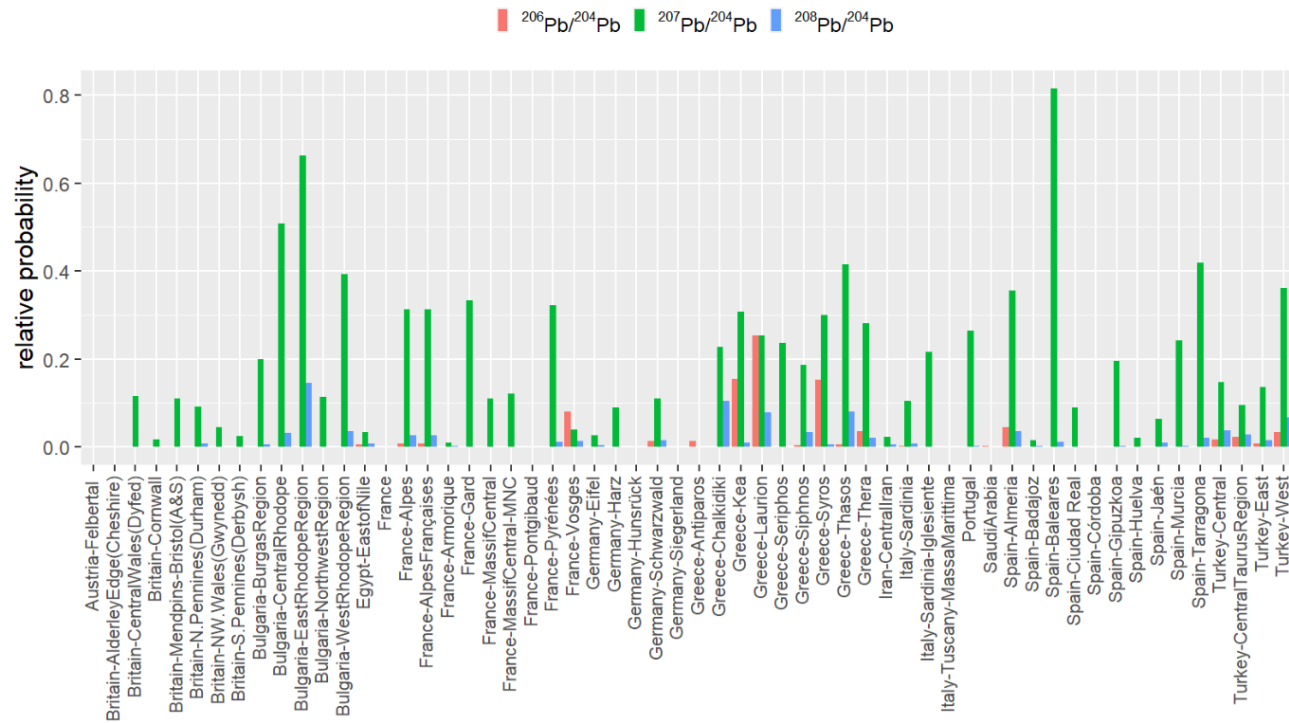

| Mining_Region                  | prob_206 | prob_207 | prob_208 | min>5%? | min |
|--------------------------------|----------|----------|----------|---------|-----|
| Austria-Felbertal              | 0%       | 0%       | 0%       | 0       | 0%  |
| Britain-AlderleyEdge(Cheshire) | 0%       | 0%       | 0%       | 0       | 0%  |
| Britain-CentralWales(Dyfed)    | 0%       | 11%      | 0%       | 0       | 0%  |
| Britain-Cornwall               | 0%       | 2%       | 0%       | 0       | 0%  |
| Britain-Mendips-Bristol(A&S)   | 0%       | 11%      | 0%       | 0       | 0%  |
| Britain-N.Pennines(Durham)     | 0%       | 9%       | 1%       | 0       | 0%  |
| Britain-NW.Wales(Gwynedd)      | 0%       | 4%       | 0%       | 0       | 0%  |
| Britain-S.Pennines(Derbysh)    | 0%       | 2%       | 0%       | 0       | 0%  |
| Bulgaria-BurgasRegion          | 0%       | 20%      | 1%       | 0       | 0%  |
| Bulgaria-CentralRhodope        | 0%       | 51%      | 3%       | 0       | 0%  |
| Bulgaria-EastRhodopeRegion     | 0%       | 66%      | 15%      | 0       | 0%  |
| Bulgaria-NorthwestRegion       | 0%       | 11%      | 0%       | 0       | 0%  |
| Bulgaria-WestRhodopeRegion     | 0%       | 39%      | 4%       | 0       | 0%  |
| Egypt-EastofNile               | 1%       | 3%       | 1%       | 0       | 1%  |
| France                         | 0%       | 0%       | 0%       | 0       | 0%  |
| France-Alpes                   | 1%       | 31%      | 3%       | 0       | 1%  |
| France-AlpesFrançaises         | 1%       | 31%      | 3%       | 0       | 1%  |
| France-Armorique               | 0%       | 1%       | 0%       | 0       | 0%  |
| France-Gard                    | 0%       | 33%      | 0%       | 0       | 0%  |
| France-MassifCentral           | 0%       | 11%      | 0%       | 0       | 0%  |
| France-MassifCentral-MNC       | 0%       | 12%      | 0%       | 0       | 0%  |
| France-Pontgibaud              | 0%       | 0%       | 0%       | 0       | 0%  |
| France-Pyrénées                | 0%       | 32%      | 1%       | 0       | 0%  |
| France-Vosges                  | 8%       | 4%       | 1%       | 0       | 1%  |
| Germany-Eifel                  | 0%       | 3%       | 0%       | 0       | 0%  |
| Germany-Harz                   | 0%       | 9%       | 0%       | 0       | 0%  |
| Germany-Hunsrück               | 0%       | 0%       | 0%       | 0       | 0%  |
| Germany-Schwarzwald            | 1%       | 11%      | 1%       | 0       | 1%  |
| Germany-Siegerland             | 0%       | 0%       | 0%       | 0       | 0%  |
| Greece-Antiparos               | 1%       | 0%       | 0%       | 0       | 0%  |
| Greece-Chalkidiki              | 0%       | 23%      | 10%      | 0       | 0%  |
| Greece-Kea                     | 15%      | 31%      | 1%       | 0       | 1%  |
| Greece-Laurion                 | 25%      | 25%      | 8%       | 1       | 8%  |
| Greece-Seriphos                | 0%       | 24%      | 0%       | 0       | 0%  |
| Greece-Siphnos                 | 0%       | 19%      | 3%       | 0       | 0%  |
| Greece-Syros                   | 15%      | 30%      | 1%       | 0       | 1%  |
| Greece-Thasos                  | 1%       | 42%      | 8%       | 0       | 1%  |
| Greece-Thera                   | 4%       | 28%      | 2%       | 0       | 2%  |
| Iran-Centrallran               | 0%       | 2%       | 0%       | 0       | 0%  |
| Italy-Sardinia                 | 0%       | 10%      | 1%       | 0       | 0%  |
| Italy-Sardinia-Iglesiente      | 0%       | 22%      | 0%       | 0       | 0%  |
| Italy-Tuscany-MassaMarittima   | 0%       | 0%       | 0%       | 0       | 0%  |
| Portugal                       | 0%       | 26%      | 0%       | 0       | 0%  |
| SaudiArabia                    | 0%       | 0%       | 0%       | 0       | 0%  |
| Spain-Almeria                  | 4%       | 36%      | 4%       | 0       | 4%  |
| Spain-Badajoz                  | 0%       | 1%       | 0%       | 0       | 0%  |
| Spain-Baleares                 | 0%       | 82%      | 1%       | 0       | 0%  |
| Spain-Ciudad Real              | 0%       | 9%       | 0%       | 0       | 0%  |
| Spain-Córdoba                  | 0%       | 0%       | 0%       | 0       | 0%  |
| Spain-Gipuzkoa                 | 0%       | 20%      | 0%       | 0       | 0%  |
| Spain-Huelva                   | 0%       | 2%       | 0%       | 0       | 0%  |
| Spain-Jaén                     | 0%       | 6%       | 1%       | 0       | 0%  |
| Spain-Murcia                   | 0%       | 24%      | 0%       | 0       | 0%  |
| Spain-Tarragona                | 0%       | 42%      | 2%       | 0       | 0%  |
| Turkey-Central                 | 2%       | 15%      | 4%       | 0       | 2%  |
| Turkey-CentralTaurusRegion     | 2%       | 10%      | 3%       | 0       | 2%  |
| Turkey-East                    | 1%       | 14%      | 2%       | 0       | 1%  |
| Turkey-West                    | 3%       | 36%      | 7%       | 0       | 3%  |

Group4: Bulgaria

a. Burgas

6-Victoriatu-98A-1a

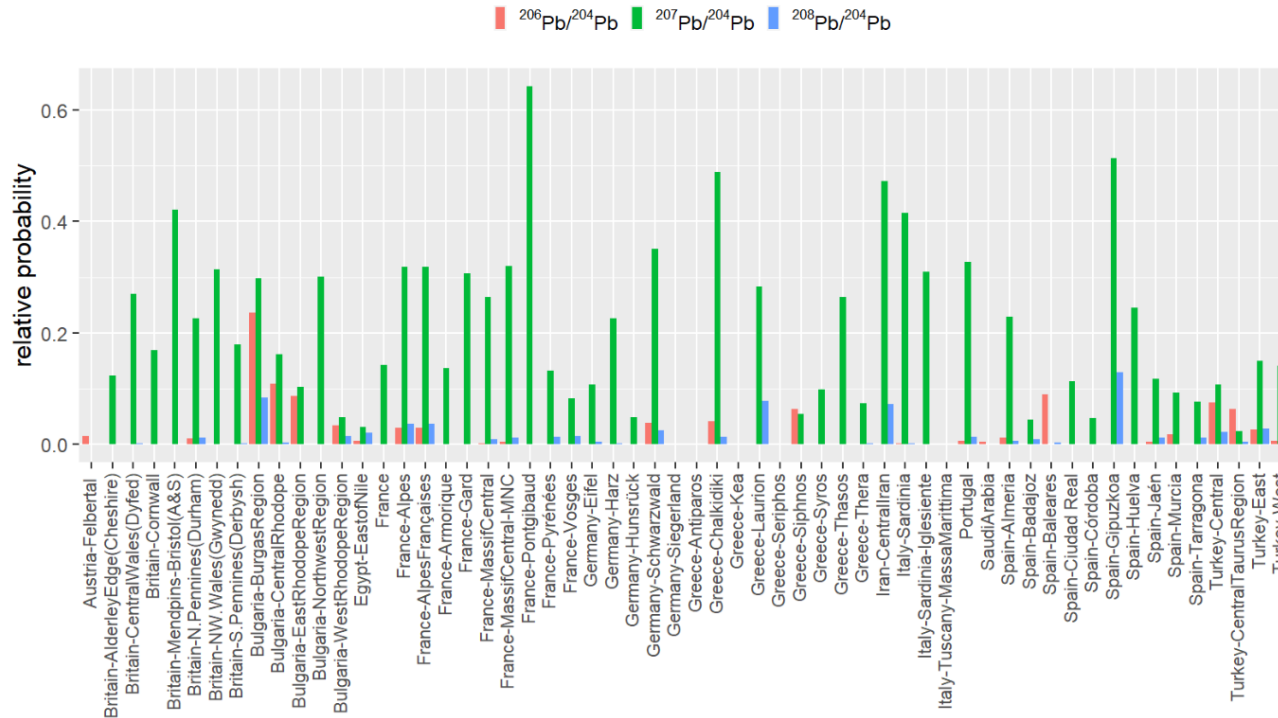

| Mining_Region                  | prob_206 | prob_207 | prob_208 | min>5%? | min |
|--------------------------------|----------|----------|----------|---------|-----|
| Austria-Felbertal              | 1%       | 0%       | 0%       | 0       | 0%  |
| Britain-AlderleyEdge(Cheshire) | 0%       | 12%      | 0%       | 0       | 0%  |
| Britain-CentralWales(Dyfed)    | 0%       | 27%      | 0%       | 0       | 0%  |
| Britain-Cornwall               | 0%       | 17%      | 0%       | 0       | 0%  |
| Britain-Mendpins-Bristol(A&S)  | 0%       | 42%      | 0%       | 0       | 0%  |
| Britain-N.Pennines(Durham)     | 1%       | 23%      | 1%       | 0       | 1%  |
| Britain-NW.Wales(Gwynedd)      | 0%       | 31%      | 0%       | 0       | 0%  |
| Britain-S.Pennines(Derbysh)    | 0%       | 18%      | 0%       | 0       | 0%  |
| Bulgaria-BurgasRegion          | 24%      | 30%      | 8%       | 1       | 8%  |
| Bulgaria-CentralRhodope        | 11%      | 16%      | 0%       | 0       | 0%  |
| Bulgaria-EastRhodopeRegion     | 9%       | 10%      | 0%       | 0       | 0%  |
| Bulgaria-NorthwestRegion       | 0%       | 30%      | 0%       | 0       | 0%  |
| Bulgaria-WestRhodopeRegion     | 3%       | 5%       | 1%       | 0       | 1%  |
| Egypt-EastofNile               | 1%       | 3%       | 2%       | 0       | 1%  |
| France                         | 0%       | 14%      | 0%       | 0       | 0%  |
| France-Alpes                   | 3%       | 32%      | 4%       | 0       | 3%  |
| France-AlpesFrançaises         | 3%       | 32%      | 4%       | 0       | 3%  |
| France-Armorique               | 0%       | 14%      | 0%       | 0       | 0%  |
| France-Gard                    | 0%       | 31%      | 0%       | 0       | 0%  |
| France-MassifCentral           | 0%       | 26%      | 1%       | 0       | 0%  |
| France-MassifCentral-MNC       | 1%       | 32%      | 1%       | 0       | 1%  |
| France-Pontgibaud              | 0%       | 64%      | 0%       | 0       | 0%  |
| France-Pyrénées                | 0%       | 13%      | 1%       | 0       | 0%  |
| France-Vosges                  | 0%       | 8%       | 1%       | 0       | 0%  |
| Germany-Eifel                  | 0%       | 11%      | 0%       | 0       | 0%  |
| Germany-Harz                   | 0%       | 23%      | 0%       | 0       | 0%  |
| Germany-Hunsrück               | 0%       | 5%       | 0%       | 0       | 0%  |
| Germany-Schwarzwald            | 4%       | 35%      | 2%       | 0       | 2%  |
| Germany-Siegerland             | 0%       | 0%       | 0%       | 0       | 0%  |
| Greece-Antiparos               | 0%       | 0%       | 0%       | 0       | 0%  |
| Greece-Chalkidiki              | 4%       | 49%      | 1%       | 0       | 1%  |
| Greece-Kea                     | 0%       | 0%       | 0%       | 0       | 0%  |
| Greece-Laurion                 | 0%       | 28%      | 8%       | 0       | 0%  |
| Greece-Seriphos                | 0%       | 0%       | 0%       | 0       | 0%  |
| Greece-Siphnos                 | 6%       | 5%       | 0%       | 0       | 0%  |
| Greece-Syros                   | 0%       | 10%      | 0%       | 0       | 0%  |
| Greece-Thasos                  | 0%       | 26%      | 0%       | 0       | 0%  |
| Greece-Thera                   | 0%       | 7%       | 0%       | 0       | 0%  |
| Iran-Centrallran               | 0%       | 47%      | 7%       | 0       | 0%  |
| Italy-Sardinia-Iglesiente      | 0%       | 41%      | 0%       | 0       | 0%  |
| Italy-Sardinia-Iglesiente      | 0%       | 31%      | 0%       | 0       | 0%  |
| Italy-Tuscany-MassaMarittima   | 0%       | 0%       | 0%       | 0       | 0%  |
| Portugal                       | 1%       | 33%      | 1%       | 0       | 1%  |
| SaudiArabia                    | 0%       | 0%       | 0%       | 0       | 0%  |
| Spain-Almeria                  | 1%       | 23%      | 1%       | 0       | 1%  |
| Spain-Badajoz                  | 0%       | 4%       | 1%       | 0       | 0%  |
| Spain-Baleares                 | 9%       | 0%       | 0%       | 0       | 0%  |
| Spain-Ciudad Real              | 0%       | 11%      | 0%       | 0       | 0%  |
| Spain-Córdoba                  | 0%       | 5%       | 0%       | 0       | 0%  |
| Spain-Gipuzkoa                 | 0%       | 51%      | 13%      | 0       | 0%  |
| Spain-Huelva                   | 0%       | 25%      | 0%       | 0       | 0%  |
| Spain-Jaén                     | 0%       | 12%      | 1%       | 0       | 0%  |
| Spain-Murcia                   | 2%       | 9%       | 0%       | 0       | 0%  |
| Spain-Tarragona                | 0%       | 8%       | 1%       | 0       | 0%  |
| Turkey-Central                 | 8%       | 11%      | 2%       | 0       | 2%  |
| Turkey-CentralTaurusRegion     | 6%       | 2%       | 0%       | 0       | 0%  |
| Turkey-East                    | 3%       | 15%      | 3%       | 0       | 3%  |
| Turkey-West                    | 1%       | 14%      | 2%       | 0       | 1%  |

# 14-Quinarius-97-2

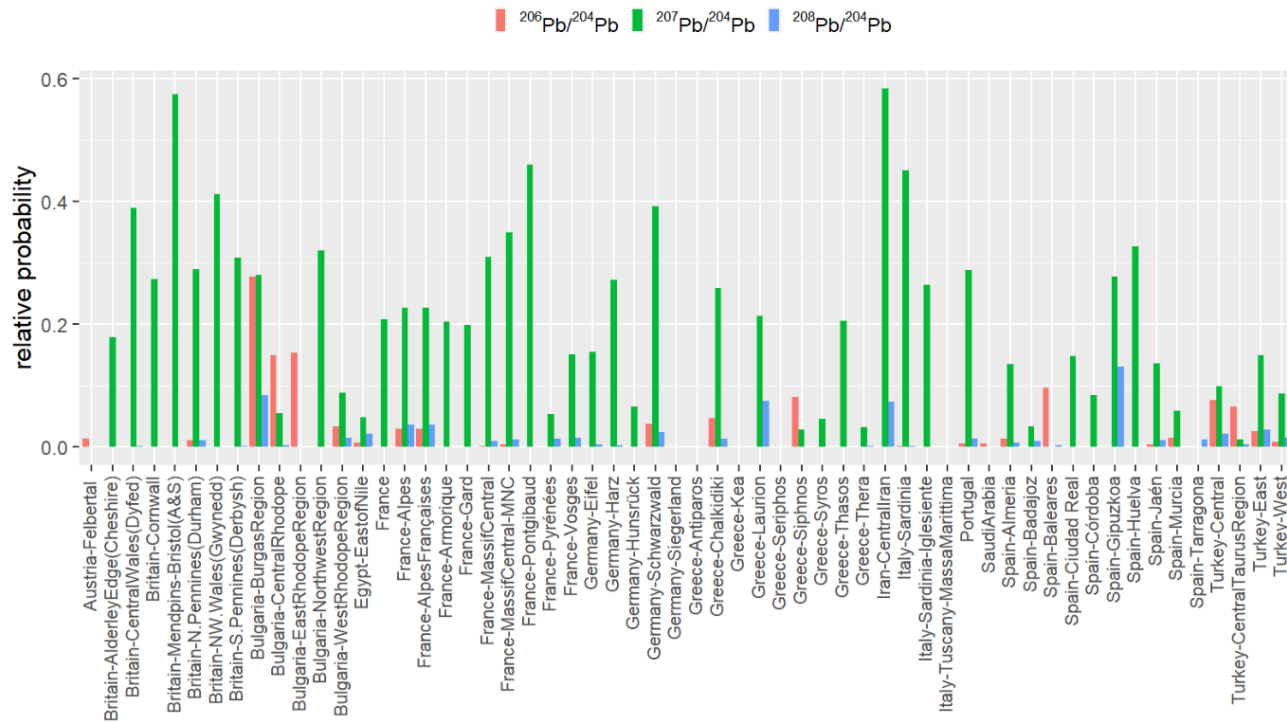

| Mining_Region                  | prob_206 | prob_207 | prob_208 | min>5%? | min |
|--------------------------------|----------|----------|----------|---------|-----|
| Austria-Felbertal              | 1%       | 0%       | 0%       | 0       | 0%  |
| Britain-AlderleyEdge(Cheshire) | 0%       | 18%      | 0%       | 0       | 0%  |
| Britain-CentralWales(Dyfed)    | 0%       | 39%      | 0%       | 0       | 0%  |
| Britain-Cornwall               | 0%       | 27%      | 0%       | 0       | 0%  |
| Britain-Mendips-Bristol(A&S)   | 0%       | 58%      | 0%       | 0       | 0%  |
| Britain-N.Pennines(Durham)     | 1%       | 29%      | 1%       | 0       | 1%  |
| Britain-NW.Wales(Gwynedd)      | 0%       | 41%      | 0%       | 0       | 0%  |
| Britain-S.Pennines(Derbysh)    | 0%       | 31%      | 0%       | 0       | 0%  |
| Bulgaria-BurgasRegion          | 28%      | 28%      | 8%       | 1       | 8%  |
| Bulgaria-CentralRhodope        | 15%      | 6%       | 0%       | 0       | 0%  |
| Bulgaria-EastRhodopeRegion     | 15%      | 0%       | 0%       | 0       | 0%  |
| Bulgaria-NorthwestRegion       | 0%       | 32%      | 0%       | 0       | 0%  |
| Bulgaria-WestRhodopeRegion     | 3%       | 9%       | 1%       | 0       | 1%  |
| Egypt-EastofNile               | 1%       | 5%       | 2%       | 0       | 1%  |
| France                         | 0%       | 21%      | 0%       | 0       | 0%  |
| France-Alpes                   | 3%       | 23%      | 4%       | 0       | 3%  |
| France-AlpesFrançaises         | 3%       | 23%      | 4%       | 0       | 3%  |
| France-Armorique               | 0%       | 20%      | 0%       | 0       | 0%  |
| France-Gard                    | 0%       | 20%      | 0%       | 0       | 0%  |
| France-MassifCentral           | 0%       | 31%      | 1%       | 0       | 0%  |
| France-MassifCentral-MNC       | 0%       | 35%      | 1%       | 0       | 0%  |
| France-Pontgibaud              | 0%       | 46%      | 0%       | 0       | 0%  |
| France-Pyrénées                | 0%       | 5%       | 1%       | 0       | 0%  |
| France-Vosges                  | 0%       | 15%      | 1%       | 0       | 0%  |
| Germany-Eifel                  | 0%       | 15%      | 0%       | 0       | 0%  |
| Germany-Harz                   | 0%       | 27%      | 0%       | 0       | 0%  |
| Germany-Hunsrück               | 0%       | 7%       | 0%       | 0       | 0%  |
| Germany-Schwarzwald            | 4%       | 39%      | 2%       | 0       | 2%  |
| Germany-Siegerland             | 0%       | 0%       | 0%       | 0       | 0%  |
| Greece-Antiparos               | 0%       | 0%       | 0%       | 0       | 0%  |
| Greece-Chalkidiki              | 5%       | 26%      | 1%       | 0       | 1%  |
| Greece-Kea                     | 0%       | 0%       | 0%       | 0       | 0%  |
| Greece-Laurion                 | 0%       | 21%      | 7%       | 0       | 0%  |
| Greece-Seriphos                | 0%       | 0%       | 0%       | 0       | 0%  |
| Greece-Siphnos                 | 8%       | 3%       | 0%       | 0       | 0%  |
| Greece-Syros                   | 0%       | 5%       | 0%       | 0       | 0%  |
| Greece-Thasos                  | 0%       | 21%      | 0%       | 0       | 0%  |
| Greece-Thera                   | 0%       | 3%       | 0%       | 0       | 0%  |
| Iran-CentralIran               | 0%       | 58%      | 7%       | 0       | 0%  |
| Italy-Sardinia                 | 0%       | 45%      | 0%       | 0       | 0%  |
| Italy-Sardinia-Iglesiente      | 0%       | 26%      | 0%       | 0       | 0%  |
| Italy-Tuscany-MassaMarittima   | 0%       | 0%       | 0%       | 0       | 0%  |
| Portugal                       | 1%       | 29%      | 1%       | 0       | 1%  |
| SaudiArabia                    | 1%       | 0%       | 0%       | 0       | 0%  |
| Spain-Almeria                  | 1%       | 13%      | 1%       | 0       | 1%  |
| Spain-Badajoz                  | 0%       | 3%       | 1%       | 0       | 0%  |
| Spain-Baleares                 | 10%      | 0%       | 0%       | 0       | 0%  |
| Spain-Ciudad Real              | 0%       | 15%      | 0%       | 0       | 0%  |
| Spain-Córdoba                  | 0%       | 8%       | 0%       | 0       | 0%  |
| Spain-Gipuzkoa                 | 0%       | 28%      | 13%      | 0       | 0%  |
| Spain-Huelva                   | 0%       | 33%      | 0%       | 0       | 0%  |
| Spain-Jaén                     | 0%       | 14%      | 1%       | 0       | 0%  |
| Spain-Murcia                   | 1%       | 6%       | 0%       | 0       | 0%  |
| Spain-Tarragona                | 0%       | 0%       | 1%       | 0       | 0%  |
| Turkey-Central                 | 8%       | 10%      | 2%       | 0       | 2%  |
| Turkey-CentralTaurusRegion     | 7%       | 1%       | 0%       | 0       | 0%  |
| Turkey-East                    | 3%       | 15%      | 3%       | 0       | 3%  |
| Turkey-West                    | 1%       | 9%       | 1%       | 0       | 1%  |

# 26-Victoriatius-102-1

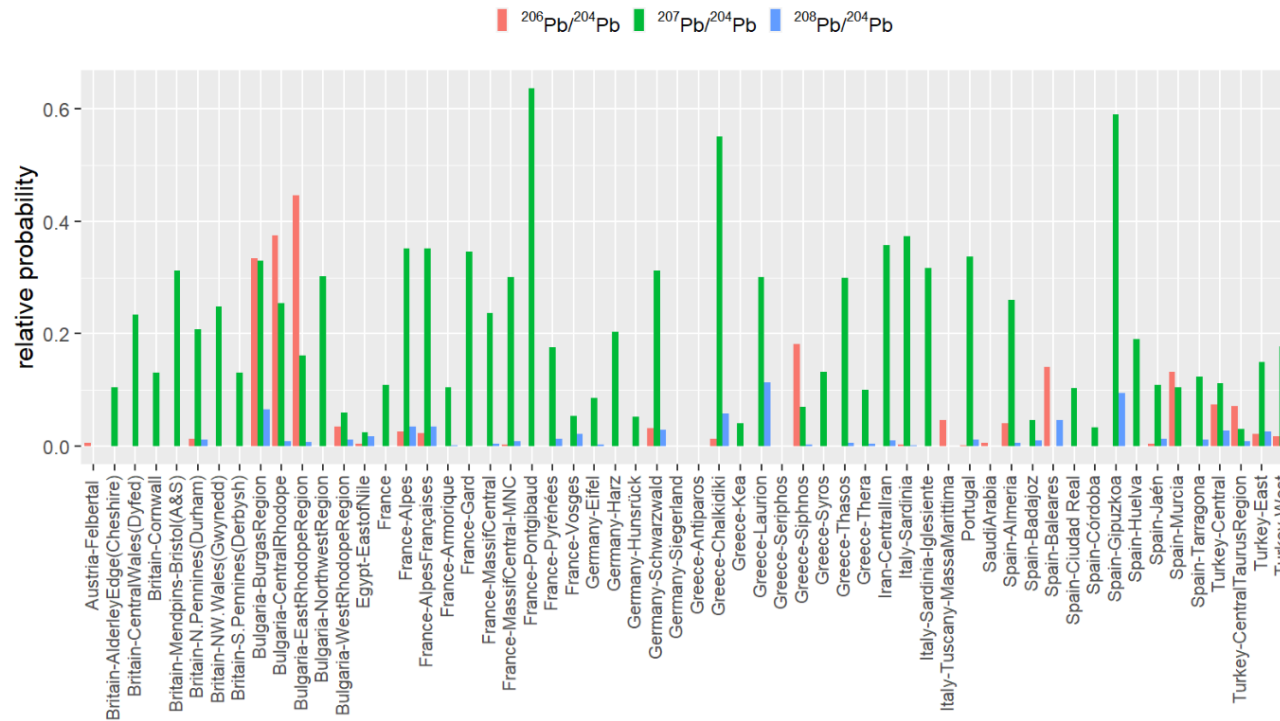

| Mining_Region                  | prob_206 | prob_207 | prob_208 | min>5%? | min |
|--------------------------------|----------|----------|----------|---------|-----|
| Austria-Felbertal              | 1%       | 0%       | 0%       | 0       | 0%  |
| Britain-AlderleyEdge(Cheshire) | 0%       | 11%      | 0%       | 0       | 0%  |
| Britain-CentralWales(Dyfed)    | 0%       | 23%      | 0%       | 0       | 0%  |
| Britain-Cornwall               | 0%       | 13%      | 0%       | 0       | 0%  |
| Britain-Mendpins-Bristol(A&S)  | 0%       | 31%      | 0%       | 0       | 0%  |
| Britain-N.Pennines(Durham)     | 1%       | 21%      | 1%       | 0       | 1%  |
| Britain-NW.Wales(Gwynedd)      | 0%       | 25%      | 0%       | 0       | 0%  |
| Britain-S.Pennines(Derbysb)    | 0%       | 13%      | 0%       | 0       | 0%  |
| Bulgaria-BurgasRegion          | 33%      | 33%      | 7%       | 1       | 7%  |
| Bulgaria-CentralRhodope        | 38%      | 25%      | 1%       | 0       | 1%  |
| Bulgaria-EastRhodopeRegion     | 45%      | 16%      | 1%       | 0       | 1%  |
| Bulgaria-NorthwestRegion       | 0%       | 30%      | 0%       | 0       | 0%  |
| Bulgaria-WestRhodopeRegion     | 4%       | 6%       | 1%       | 0       | 1%  |
| Egypt-EastofNile               | 1%       | 2%       | 2%       | 0       | 1%  |
| France                         | 0%       | 11%      | 0%       | 0       | 0%  |
| France-Alpes                   | 3%       | 35%      | 3%       | 0       | 3%  |
| France-AlpesFrançaises         | 2%       | 35%      | 3%       | 0       | 2%  |
| France-Armorique               | 0%       | 10%      | 0%       | 0       | 0%  |
| France-Gard                    | 0%       | 35%      | 0%       | 0       | 0%  |
| France-MassifCentral           | 0%       | 24%      | 0%       | 0       | 0%  |
| France-MassifCentral-MNC       | 0%       | 30%      | 1%       | 0       | 0%  |
| France-Pontgibaud              | 0%       | 64%      | 0%       | 0       | 0%  |
| France-Pyrénées                | 0%       | 18%      | 1%       | 0       | 0%  |
| France-Vosges                  | 0%       | 5%       | 2%       | 0       | 0%  |
| Germany-Eifel                  | 0%       | 9%       | 0%       | 0       | 0%  |
| Germany-Harz                   | 0%       | 20%      | 0%       | 0       | 0%  |
| Germany-Hunsrück               | 0%       | 5%       | 0%       | 0       | 0%  |
| Germany-Schwarzwald            | 3%       | 31%      | 3%       | 0       | 3%  |
| Germany-Siegerland             | 0%       | 0%       | 0%       | 0       | 0%  |
| Greece-Antiparos               | 0%       | 0%       | 0%       | 0       | 0%  |
| Greece-Chalkidiki              | 1%       | 55%      | 6%       | 0       | 1%  |
| Greece-Kea                     | 0%       | 4%       | 0%       | 0       | 0%  |
| Greece-Laurion                 | 0%       | 30%      | 11%      | 0       | 0%  |
| Greece-Seriphos                | 0%       | 0%       | 0%       | 0       | 0%  |
| Greece-Siphnos                 | 18%      | 7%       | 0%       | 0       | 0%  |
| Greece-Syros                   | 0%       | 13%      | 0%       | 0       | 0%  |
| Greece-Thasos                  | 0%       | 30%      | 1%       | 0       | 0%  |
| Greece-Thera                   | 0%       | 10%      | 0%       | 0       | 0%  |
| Iran-Centrallran               | 0%       | 36%      | 1%       | 0       | 0%  |
| Italy-Sardinia-Iglesiente      | 0%       | 37%      | 0%       | 0       | 0%  |
| Italy-Sardinia-Iglesiente      | 0%       | 32%      | 0%       | 0       | 0%  |
| Italy-Tuscany-MassaMarittima   | 5%       | 0%       | 0%       | 0       | 0%  |
| Portugal                       | 0%       | 34%      | 1%       | 0       | 0%  |
| SaudiArabia                    | 1%       | 0%       | 0%       | 0       | 0%  |
| Spain-Almeria                  | 4%       | 26%      | 1%       | 0       | 1%  |
| Spain-Badajoz                  | 0%       | 5%       | 1%       | 0       | 0%  |
| Spain-Baleares                 | 14%      | 0%       | 5%       | 0       | 0%  |
| Spain-Ciudad Real              | 0%       | 10%      | 0%       | 0       | 0%  |
| Spain-Córdoba                  | 0%       | 3%       | 0%       | 0       | 0%  |
| Spain-Gipuzkoa                 | 0%       | 59%      | 9%       | 0       | 0%  |
| Spain-Huelva                   | 0%       | 19%      | 0%       | 0       | 0%  |
| Spain-Jaén                     | 0%       | 11%      | 1%       | 0       | 0%  |
| Spain-Murcia                   | 13%      | 11%      | 0%       | 0       | 0%  |
| Spain-Tarragona                | 0%       | 12%      | 1%       | 0       | 0%  |
| Turkey-Central                 | 7%       | 11%      | 3%       | 0       | 3%  |
| Turkey-CentralTaurusRegion     | 7%       | 3%       | 1%       | 0       | 1%  |
| Turkey-East                    | 2%       | 15%      | 3%       | 0       | 2%  |
| Turkey-West                    | 2%       | 18%      | 3%       | 0       | 2%  |

b. Central Rhodope Region

MS031

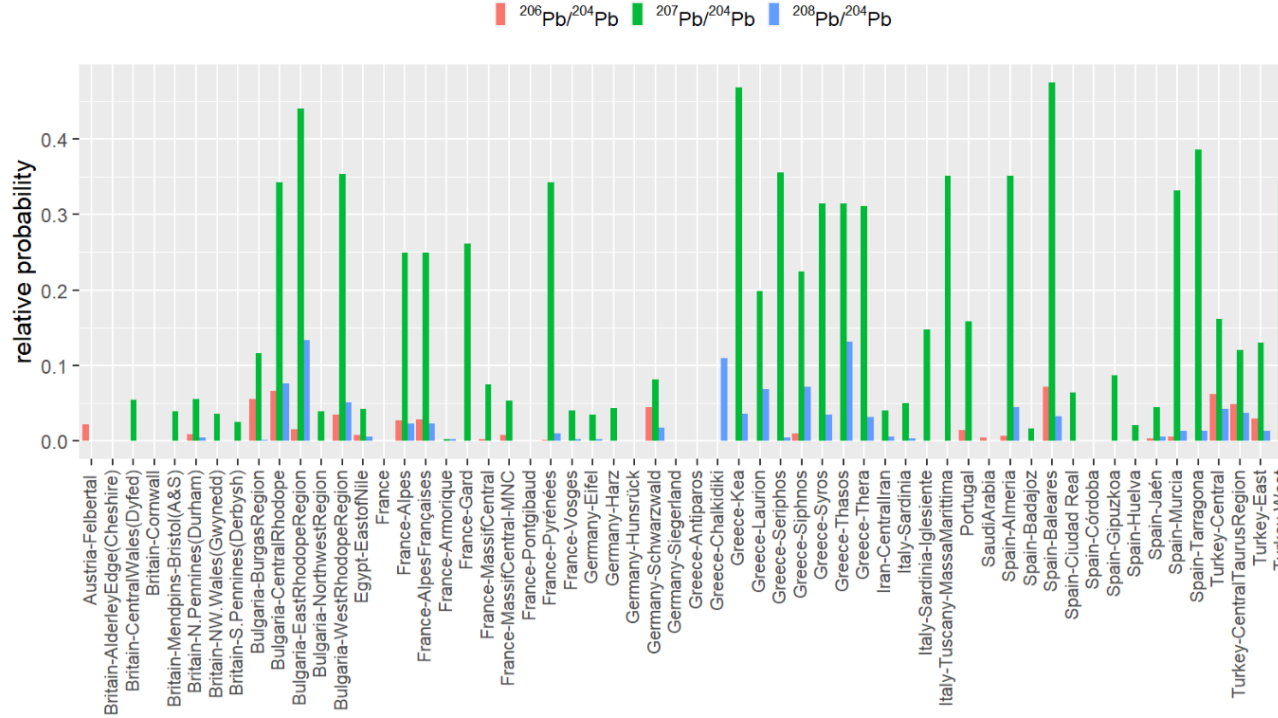

| Mining_Region                  | prob_206 | prob_207 | prob_208 | min>5%? | min |
|--------------------------------|----------|----------|----------|---------|-----|
| Austria-Felbertal              | 2%       | 0%       | 0%       | 0       | 0%  |
| Britain-AlderleyEdge(Cheshire) | 0%       | 0%       | 0%       | 0       | 0%  |
| Britain-CentralWales(Dyfed)    | 0%       | 5%       | 0%       | 0       | 0%  |
| Britain-Cornwall               | 0%       | 0%       | 0%       | 0       | 0%  |
| Britain-Mendpins-Bristol(A&S)  | 0%       | 4%       | 0%       | 0       | 0%  |
| Britain-N.Pennines(Durham)     | 1%       | 6%       | 0%       | 0       | 0%  |
| Britain-NW.Wales(Gwynedd)      | 0%       | 4%       | 0%       | 0       | 0%  |
| Britain-S.Pennines(Derbysh)    | 0%       | 2%       | 0%       | 0       | 0%  |
| Bulgaria-BurgasRegion          | 6%       | 12%      | 0%       | 0       | 0%  |
| Bulgaria-CentralRhodope        | 7%       | 34%      | 8%       | 1       | 7%  |
| Bulgaria-EastRhodopeRegion     | 1%       | 44%      | 13%      | 0       | 1%  |
| Bulgaria-NorthwestRegion       | 0%       | 4%       | 0%       | 0       | 0%  |
| Bulgaria-WestRhodopeRegion     | 4%       | 35%      | 5%       | 0       | 4%  |
| Egypt-EastofNile               | 1%       | 4%       | 1%       | 0       | 1%  |
| France                         | 0%       | 0%       | 0%       | 0       | 0%  |
| France-Alpes                   | 3%       | 25%      | 2%       | 0       | 2%  |
| France-AlpesFrançaises         | 3%       | 25%      | 2%       | 0       | 2%  |
| France-Armorique               | 0%       | 0%       | 0%       | 0       | 0%  |
| France-Gard                    | 0%       | 26%      | 0%       | 0       | 0%  |
| France-MassifCentral           | 0%       | 8%       | 0%       | 0       | 0%  |
| France-MassifCentral-MNC       | 1%       | 5%       | 0%       | 0       | 0%  |
| France-Pontgibaud              | 0%       | 0%       | 0%       | 0       | 0%  |
| France-Pyrénées                | 0%       | 34%      | 1%       | 0       | 0%  |
| France-Vosges                  | 0%       | 4%       | 0%       | 0       | 0%  |
| Germany-Eifel                  | 0%       | 3%       | 0%       | 0       | 0%  |
| Germany-Harz                   | 0%       | 4%       | 0%       | 0       | 0%  |
| Germany-Hunsrück               | 0%       | 0%       | 0%       | 0       | 0%  |
| Germany-Schwarzwald            | 4%       | 8%       | 2%       | 0       | 2%  |
| Germany-Siegerland             | 0%       | 0%       | 0%       | 0       | 0%  |
| Greece-Antiparos               | 0%       | 0%       | 11%      | 0       | 0%  |
| Greece-Chalkidiki              | 0%       | 0%       | 0%       | 0       | 0%  |
| Greece-Kea                     | 0%       | 47%      | 4%       | 0       | 0%  |
| Greece-Laurion                 | 0%       | 20%      | 7%       | 0       | 0%  |
| Greece-Seriphos                | 0%       | 36%      | 0%       | 0       | 0%  |
| Greece-Siphnos                 | 1%       | 22%      | 7%       | 0       | 1%  |
| Greece-Syros                   | 0%       | 31%      | 3%       | 0       | 0%  |
| Greece-Thasos                  | 0%       | 31%      | 13%      | 0       | 0%  |
| Greece-Thera                   | 0%       | 31%      | 3%       | 0       | 0%  |
| Iran-CentralIran               | 0%       | 4%       | 1%       | 0       | 0%  |
| Italy-Sardinia                 | 0%       | 5%       | 0%       | 0       | 0%  |
| Italy-Sardinia-Iglesiente      | 0%       | 15%      | 0%       | 0       | 0%  |
| Italy-Tuscany-MassaMarittima   | 0%       | 35%      | 0%       | 0       | 0%  |
| Portugal                       | 1%       | 16%      | 0%       | 0       | 0%  |
| SaudiArabia                    | 0%       | 0%       | 0%       | 0       | 0%  |
| Spain-Almeria                  | 1%       | 35%      | 4%       | 0       | 1%  |
| Spain-Badajoz                  | 0%       | 2%       | 0%       | 0       | 0%  |
| Spain-Baleares                 | 7%       | 47%      | 3%       | 0       | 3%  |
| Spain-Ciudad Real              | 0%       | 6%       | 0%       | 0       | 0%  |
| Spain-Córdoba                  | 0%       | 0%       | 0%       | 0       | 0%  |
| Spain-Gipuzkoa                 | 0%       | 9%       | 0%       | 0       | 0%  |
| Spain-Huelva                   | 0%       | 2%       | 0%       | 0       | 0%  |
| Spain-Jaén                     | 0%       | 4%       | 1%       | 0       | 0%  |
| Spain-Murcia                   | 1%       | 33%      | 1%       | 0       | 1%  |
| Spain-Tarragona                | 0%       | 39%      | 1%       | 0       | 0%  |
| Turkey-Central                 | 6%       | 16%      | 4%       | 0       | 4%  |
| Turkey-CentralTaurusRegion     | 5%       | 12%      | 4%       | 0       | 4%  |
| Turkey-East                    | 3%       | 13%      | 1%       | 0       | 1%  |
| Turkey-West                    | 0%       | 35%      | 8%       | 0       | 0%  |



MS044

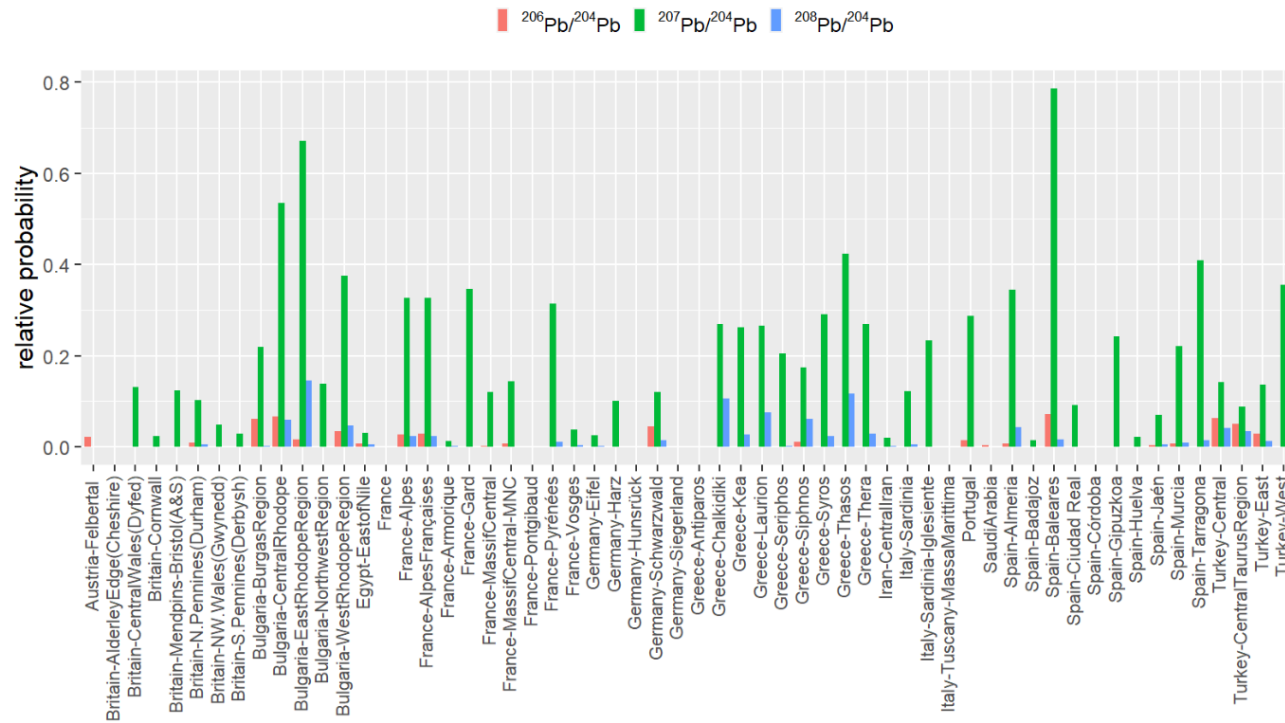

| Mining_Region                  | prob_206 | prob_207 | prob_208 | min>5%? | min |
|--------------------------------|----------|----------|----------|---------|-----|
| Austria-Felbertal              | 2%       | 0%       | 0%       | 0       | 0%  |
| Britain-AlderleyEdge(Cheshire) | 0%       | 0%       | 0%       | 0       | 0%  |
| Britain-CentralWales(Dyfed)    | 0%       | 13%      | 0%       | 0       | 0%  |
| Britain-Cornwall               | 0%       | 2%       | 0%       | 0       | 0%  |
| Britain-Mendips-Bristol(A&S)   | 0%       | 12%      | 0%       | 0       | 0%  |
| Britain-N.Pennines(Durham)     | 1%       | 10%      | 1%       | 0       | 1%  |
| Britain-NW.Wales(Gwynedd)      | 0%       | 5%       | 0%       | 0       | 0%  |
| Britain-S.Pennines(Derbysh)    | 0%       | 3%       | 0%       | 0       | 0%  |
| Bulgaria-BurgasRegion          | 6%       | 22%      | 0%       | 0       | 0%  |
| Bulgaria-CentralRhodope        | 7%       | 53%      | 6%       | 1       | 6%  |
| Bulgaria-EastRhodopeRegion     | 2%       | 67%      | 14%      | 0       | 2%  |
| Bulgaria-NorthwestRegion       | 0%       | 14%      | 0%       | 0       | 0%  |
| Bulgaria-WestRhodopeRegion     | 4%       | 37%      | 5%       | 0       | 4%  |
| Egypt-EastofNile               | 1%       | 3%       | 1%       | 0       | 1%  |
| France                         | 0%       | 0%       | 0%       | 0       | 0%  |
| France-Alpes                   | 3%       | 33%      | 2%       | 0       | 2%  |
| France-AlpesFrançaises         | 3%       | 33%      | 2%       | 0       | 2%  |
| France-Armorique               | 0%       | 1%       | 0%       | 0       | 0%  |
| France-Gard                    | 0%       | 35%      | 0%       | 0       | 0%  |
| France-MassifCentral           | 0%       | 12%      | 0%       | 0       | 0%  |
| France-MassifCentral-MNC       | 1%       | 14%      | 0%       | 0       | 0%  |
| France-Pontgibaud              | 0%       | 0%       | 0%       | 0       | 0%  |
| France-Pyrénées                | 0%       | 31%      | 1%       | 0       | 0%  |
| France-Vosges                  | 0%       | 4%       | 0%       | 0       | 0%  |
| Germany-Eifel                  | 0%       | 3%       | 0%       | 0       | 0%  |
| Germany-Harz                   | 0%       | 10%      | 0%       | 0       | 0%  |
| Germany-Hunsrück               | 0%       | 0%       | 0%       | 0       | 0%  |
| Germany-Schwarzwald            | 4%       | 12%      | 1%       | 0       | 1%  |
| Germany-Siegerland             | 0%       | 0%       | 0%       | 0       | 0%  |
| Greece-Antiparos               | 0%       | 0%       | 0%       | 0       | 0%  |
| Greece-Chalkidiki              | 0%       | 27%      | 11%      | 0       | 0%  |
| Greece-Kea                     | 0%       | 26%      | 3%       | 0       | 0%  |
| Greece-Laurion                 | 0%       | 27%      | 8%       | 0       | 0%  |
| Greece-Seriphos                | 0%       | 20%      | 0%       | 0       | 0%  |
| Greece-Siphos                  | 1%       | 17%      | 6%       | 0       | 1%  |
| Greece-Syros                   | 0%       | 29%      | 2%       | 0       | 0%  |
| Greece-Thasos                  | 0%       | 42%      | 12%      | 0       | 0%  |
| Greece-Thera                   | 0%       | 27%      | 3%       | 0       | 0%  |
| Iran-Centrallran               | 0%       | 2%       | 0%       | 0       | 0%  |
| Italy-Sardinia                 | 0%       | 12%      | 0%       | 0       | 0%  |
| Italy-Sardinia-Iglesiente      | 0%       | 23%      | 0%       | 0       | 0%  |
| Italy-Tuscany-MassaMarittima   | 0%       | 0%       | 0%       | 0       | 0%  |
| Portugal                       | 1%       | 29%      | 0%       | 0       | 0%  |
| SaudiArabia                    | 0%       | 0%       | 0%       | 0       | 0%  |
| Spain-Almeria                  | 1%       | 35%      | 4%       | 0       | 1%  |
| Spain-Badajoz                  | 0%       | 1%       | 0%       | 0       | 0%  |
| Spain-Baleares                 | 7%       | 79%      | 2%       | 0       | 2%  |
| Spain-Ciudad Real              | 0%       | 9%       | 0%       | 0       | 0%  |
| Spain-Córdoba                  | 0%       | 0%       | 0%       | 0       | 0%  |
| Spain-Gipuzkoa                 | 0%       | 24%      | 0%       | 0       | 0%  |
| Spain-Huelva                   | 0%       | 2%       | 0%       | 0       | 0%  |
| Spain-Jaén                     | 0%       | 7%       | 1%       | 0       | 0%  |
| Spain-Murcia                   | 1%       | 22%      | 1%       | 0       | 1%  |
| Spain-Tarragona                | 0%       | 41%      | 1%       | 0       | 0%  |
| Turkey-Central                 | 6%       | 14%      | 4%       | 0       | 4%  |
| Turkey-CentralTaurusRegion     | 5%       | 9%       | 3%       | 0       | 3%  |
| Turkey-East                    | 3%       | 14%      | 1%       | 0       | 1%  |
| Turkey-West                    | 0%       | 35%      | 8%       | 0       | 0%  |

c. East Rhodope Region

### 5-Denarius-53-2

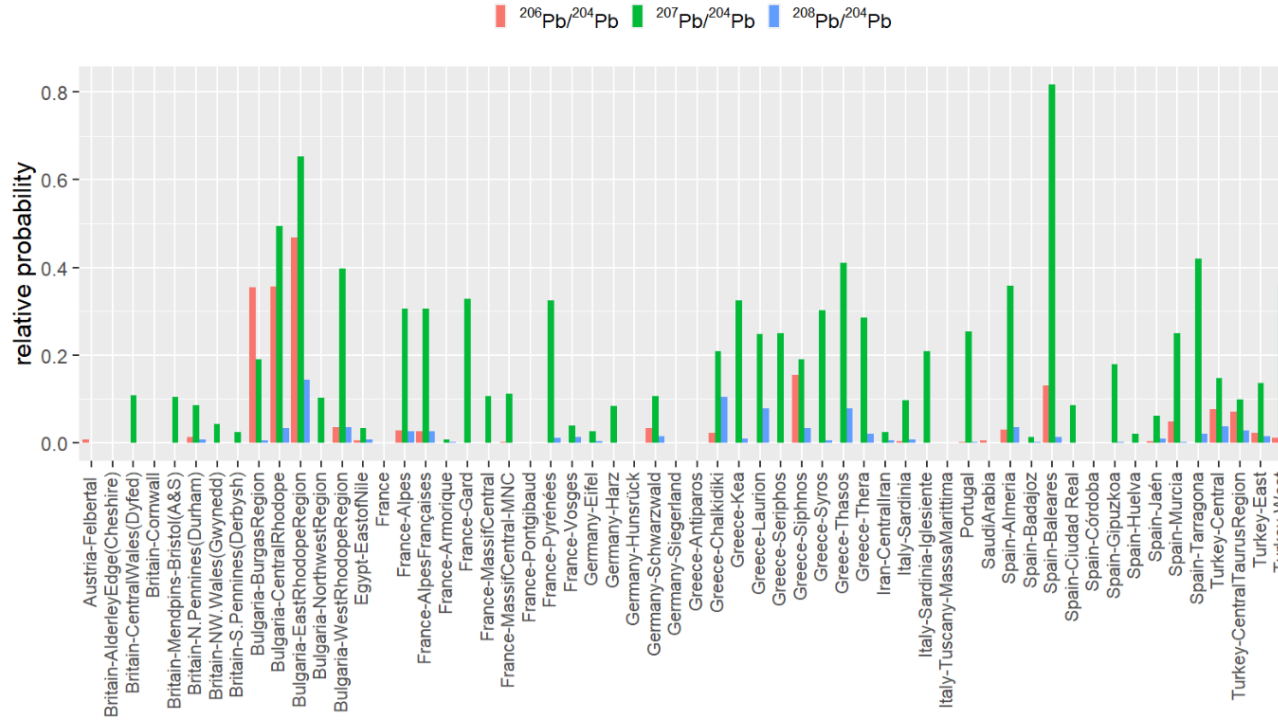

| Mining_Region                  | prob_206 | prob_207 | prob_208 | min>5%? | min |
|--------------------------------|----------|----------|----------|---------|-----|
| Austria-Felbertal              | 1%       | 0%       | 0%       | 0       | 0%  |
| Britain-AlderleyEdge(Cheshire) | 0%       | 0%       | 0%       | 0       | 0%  |
| Britain-CentralWales(Dyfed)    | 0%       | 11%      | 0%       | 0       | 0%  |
| Britain-Cornwall               | 0%       | 0%       | 0%       | 0       | 0%  |
| Britain-Mendpins-Bristol(A&S)  | 0%       | 10%      | 0%       | 0       | 0%  |
| Britain-N.Pennines(Durham)     | 1%       | 9%       | 1%       | 0       | 1%  |
| Britain-NW.Wales(Gwynedd)      | 0%       | 4%       | 0%       | 0       | 0%  |
| Britain-S.Pennines(Derbysh)    | 0%       | 2%       | 0%       | 0       | 0%  |
| Bulgaria-BurgasRegion          | 35%      | 19%      | 1%       | 0       | 1%  |
| Bulgaria-CentralRhodope        | 36%      | 49%      | 3%       | 0       | 3%  |
| Bulgaria-EastRhodopeRegion     | 47%      | 65%      | 14%      | 1       | 14% |
| Bulgaria-NorthwestRegion       | 0%       | 10%      | 0%       | 0       | 0%  |
| Bulgaria-WestRhodopeRegion     | 3%       | 40%      | 4%       | 0       | 3%  |
| Egypt-EastofNile               | 1%       | 3%       | 1%       | 0       | 1%  |
| France                         | 0%       | 0%       | 0%       | 0       | 0%  |
| France-Alpes                   | 3%       | 31%      | 3%       | 0       | 3%  |
| France-AlpesFrançaises         | 3%       | 31%      | 3%       | 0       | 3%  |
| France-Armorique               | 0%       | 1%       | 0%       | 0       | 0%  |
| France-Gard                    | 0%       | 33%      | 0%       | 0       | 0%  |
| France-MassifCentral           | 0%       | 11%      | 0%       | 0       | 0%  |
| France-MassifCentral-MNC       | 0%       | 11%      | 0%       | 0       | 0%  |
| France-Pontgibaud              | 0%       | 0%       | 0%       | 0       | 0%  |
| France-Pyrénées                | 0%       | 32%      | 1%       | 0       | 0%  |
| France-Vosges                  | 0%       | 4%       | 1%       | 0       | 0%  |
| Germany-Eifel                  | 0%       | 3%       | 0%       | 0       | 0%  |
| Germany-Harz                   | 0%       | 8%       | 0%       | 0       | 0%  |
| Germany-Hunsrück               | 0%       | 0%       | 0%       | 0       | 0%  |
| Germany-Schwarzwald            | 3%       | 11%      | 2%       | 0       | 2%  |
| Germany-Siegerland             | 0%       | 0%       | 0%       | 0       | 0%  |
| Greece-Antiparos               | 0%       | 0%       | 0%       | 0       | 0%  |
| Greece-Chalkidiki              | 2%       | 21%      | 10%      | 0       | 2%  |
| Greece-Kea                     | 0%       | 32%      | 1%       | 0       | 0%  |
| Greece-Laurion                 | 0%       | 25%      | 8%       | 0       | 0%  |
| Greece-Seriphos                | 0%       | 25%      | 0%       | 0       | 0%  |
| Greece-Siphnos                 | 16%      | 19%      | 3%       | 0       | 3%  |
| Greece-Syros                   | 0%       | 30%      | 1%       | 0       | 0%  |
| Greece-Thasos                  | 0%       | 41%      | 8%       | 0       | 0%  |
| Greece-Thera                   | 0%       | 29%      | 2%       | 0       | 0%  |
| Iran-CentralIran               | 0%       | 2%       | 1%       | 0       | 0%  |
| Italy-Sardinia                 | 0%       | 10%      | 1%       | 0       | 0%  |
| Italy-Sardinia-Iglesiente      | 0%       | 21%      | 0%       | 0       | 0%  |
| Italy-Tuscany-MassaMarittima   | 0%       | 0%       | 0%       | 0       | 0%  |
| Portugal                       | 0%       | 25%      | 0%       | 0       | 0%  |
| SaudiArabia                    | 1%       | 0%       | 0%       | 0       | 0%  |
| Spain-Almeria                  | 3%       | 36%      | 4%       | 0       | 3%  |
| Spain-Badajoz                  | 0%       | 1%       | 0%       | 0       | 0%  |
| Spain-Baleares                 | 13%      | 82%      | 1%       | 0       | 1%  |
| Spain-Ciudad Real              | 0%       | 9%       | 0%       | 0       | 0%  |
| Spain-Córdoba                  | 0%       | 0%       | 0%       | 0       | 0%  |
| Spain-Gipuzkoa                 | 0%       | 18%      | 0%       | 0       | 0%  |
| Spain-Huelva                   | 0%       | 2%       | 0%       | 0       | 0%  |
| Spain-Jaén                     | 0%       | 6%       | 1%       | 0       | 0%  |
| Spain-Murcia                   | 5%       | 25%      | 0%       | 0       | 0%  |
| Spain-Tarragona                | 0%       | 42%      | 2%       | 0       | 0%  |
| Turkey-Central                 | 8%       | 15%      | 4%       | 0       | 4%  |
| Turkey-CentralTaurusRegion     | 7%       | 10%      | 3%       | 0       | 3%  |
| Turkey-East                    | 2%       | 14%      | 2%       | 0       | 2%  |
| Turkey-West                    | 1%       | 36%      | 7%       | 0       | 1%  |

d. West Rhodope Region

MS032

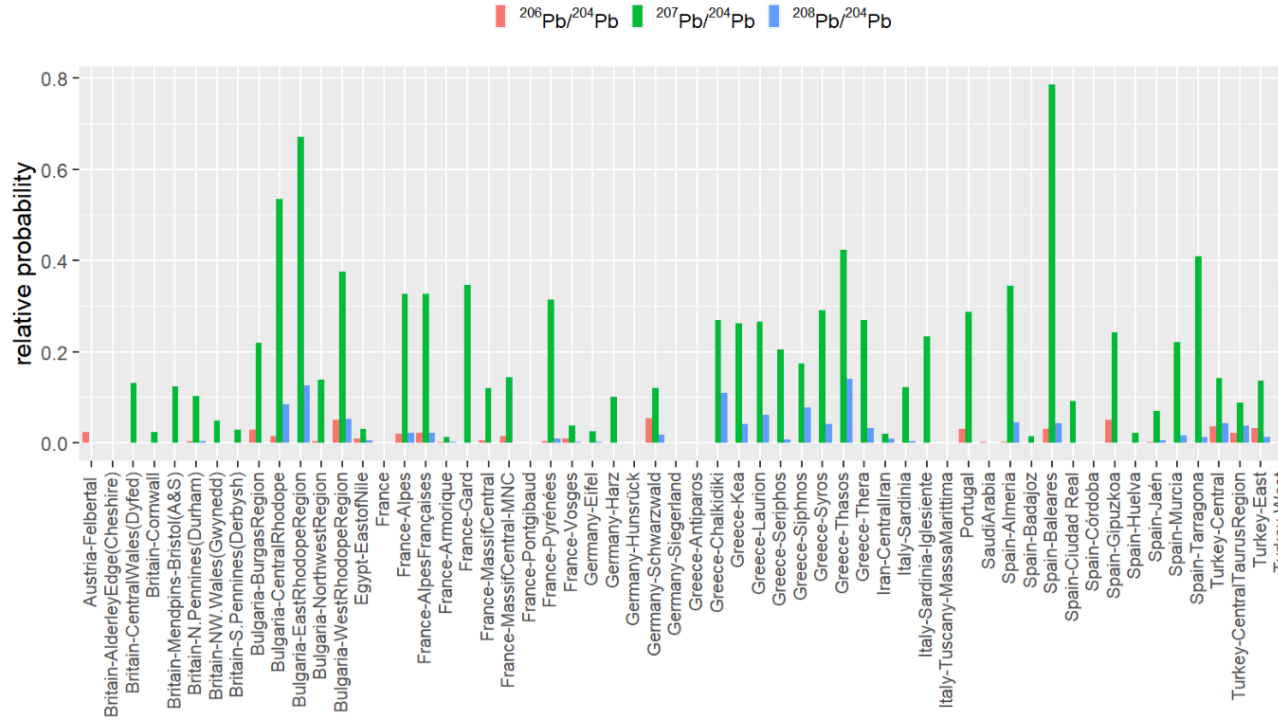

| Mining_Region                  | prob_206 | prob_207 | prob_208 | min>5%? | min |
|--------------------------------|----------|----------|----------|---------|-----|
| Austria-Felbertal              | 2%       | 0%       | 0%       | 0       | 0%  |
| Britain-AlderleyEdge(Cheshire) | 0%       | 0%       | 0%       | 0       | 0%  |
| Britain-CentralWales(Dyfed)    | 0%       | 13%      | 0%       | 0       | 0%  |
| Britain-Cornwall               | 0%       | 2%       | 0%       | 0       | 0%  |
| Britain-Mendpins-Bristol(A&S)  | 0%       | 12%      | 0%       | 0       | 0%  |
| Britain-N.Pennines(Durham)     | 0%       | 10%      | 0%       | 0       | 0%  |
| Britain-NW.Wales(Gwynedd)      | 0%       | 5%       | 0%       | 0       | 0%  |
| Britain-S.Pennines(Derbysh)    | 0%       | 3%       | 0%       | 0       | 0%  |
| Bulgaria-BurgasRegion          | 3%       | 22%      | 0%       | 0       | 0%  |
| Bulgaria-CentralRhodope        | 1%       | 53%      | 8%       | 0       | 1%  |
| Bulgaria-EastRhodopeRegion     | 0%       | 67%      | 13%      | 0       | 0%  |
| Bulgaria-NorthwestRegion       | 0%       | 14%      | 0%       | 0       | 0%  |
| Bulgaria-WestRhodopeRegion     | 5%       | 37%      | 5%       | 0       | 5%  |
| Egypt-EastofNile               | 1%       | 3%       | 0%       | 0       | 0%  |
| France                         | 0%       | 0%       | 0%       | 0       | 0%  |
| France-Alpes                   | 2%       | 33%      | 2%       | 0       | 2%  |
| France-AlpesFrançaises         | 2%       | 33%      | 2%       | 0       | 2%  |
| France-Armorique               | 0%       | 1%       | 0%       | 0       | 0%  |
| France-Gard                    | 0%       | 35%      | 0%       | 0       | 0%  |
| France-MassifCentral           | 1%       | 12%      | 0%       | 0       | 0%  |
| France-MassifCentral-MNC       | 1%       | 14%      | 0%       | 0       | 0%  |
| France-Pontgibaud              | 0%       | 0%       | 0%       | 0       | 0%  |
| France-Pyrénées                | 0%       | 31%      | 1%       | 0       | 0%  |
| France-Vosges                  | 1%       | 4%       | 0%       | 0       | 0%  |
| Germany-Eifel                  | 0%       | 3%       | 0%       | 0       | 0%  |
| Germany-Harz                   | 0%       | 10%      | 0%       | 0       | 0%  |
| Germany-Hunsrück               | 0%       | 0%       | 0%       | 0       | 0%  |
| Germany-Schwarzwald            | 5%       | 12%      | 2%       | 0       | 2%  |
| Germany-Siegerland             | 0%       | 0%       | 0%       | 0       | 0%  |
| Greece-Antiparos               | 0%       | 0%       | 0%       | 0       | 0%  |
| Greece-Chalkidiki              | 0%       | 27%      | 11%      | 0       | 0%  |
| Greece-Kea                     | 0%       | 26%      | 4%       | 0       | 0%  |
| Greece-Laurion                 | 0%       | 27%      | 6%       | 0       | 0%  |
| Greece-Seriphos                | 0%       | 20%      | 1%       | 0       | 0%  |
| Greece-Siphnos                 | 0%       | 17%      | 8%       | 0       | 0%  |
| Greece-Syros                   | 0%       | 29%      | 4%       | 0       | 0%  |
| Greece-Thasos                  | 0%       | 42%      | 14%      | 0       | 0%  |
| Greece-Thera                   | 0%       | 27%      | 3%       | 0       | 0%  |
| Iran-Centrallran               | 0%       | 2%       | 1%       | 0       | 0%  |
| Italy-Sardinia-Iglesiente      | 0%       | 12%      | 0%       | 0       | 0%  |
| Italy-Sardinia-Iglesiente      | 0%       | 23%      | 0%       | 0       | 0%  |
| Italy-Tuscany-MassaMarittima   | 0%       | 0%       | 0%       | 0       | 0%  |
| Portugal                       | 3%       | 29%      | 0%       | 0       | 0%  |
| SaudiArabia                    | 0%       | 0%       | 0%       | 0       | 0%  |
| Spain-Almeria                  | 0%       | 35%      | 5%       | 0       | 0%  |
| Spain-Badajoz                  | 0%       | 1%       | 0%       | 0       | 0%  |
| Spain-Baleares                 | 3%       | 79%      | 4%       | 0       | 3%  |
| Spain-Ciudad Real              | 0%       | 9%       | 0%       | 0       | 0%  |
| Spain-Córdoba                  | 0%       | 0%       | 0%       | 0       | 0%  |
| Spain-Gipuzkoa                 | 5%       | 24%      | 0%       | 0       | 0%  |
| Spain-Huelva                   | 0%       | 2%       | 0%       | 0       | 0%  |
| Spain-Jaén                     | 0%       | 7%       | 0%       | 0       | 0%  |
| Spain-Murcia                   | 0%       | 22%      | 2%       | 0       | 0%  |
| Spain-Tarragona                | 0%       | 41%      | 1%       | 0       | 0%  |
| Turkey-Central                 | 4%       | 14%      | 4%       | 0       | 4%  |
| Turkey-CentralTaurusRegion     | 2%       | 9%       | 4%       | 0       | 2%  |
| Turkey-East                    | 3%       | 14%      | 1%       | 0       | 1%  |
| Turkey-West                    | 0%       | 35%      | 8%       | 0       | 0%  |

MS048

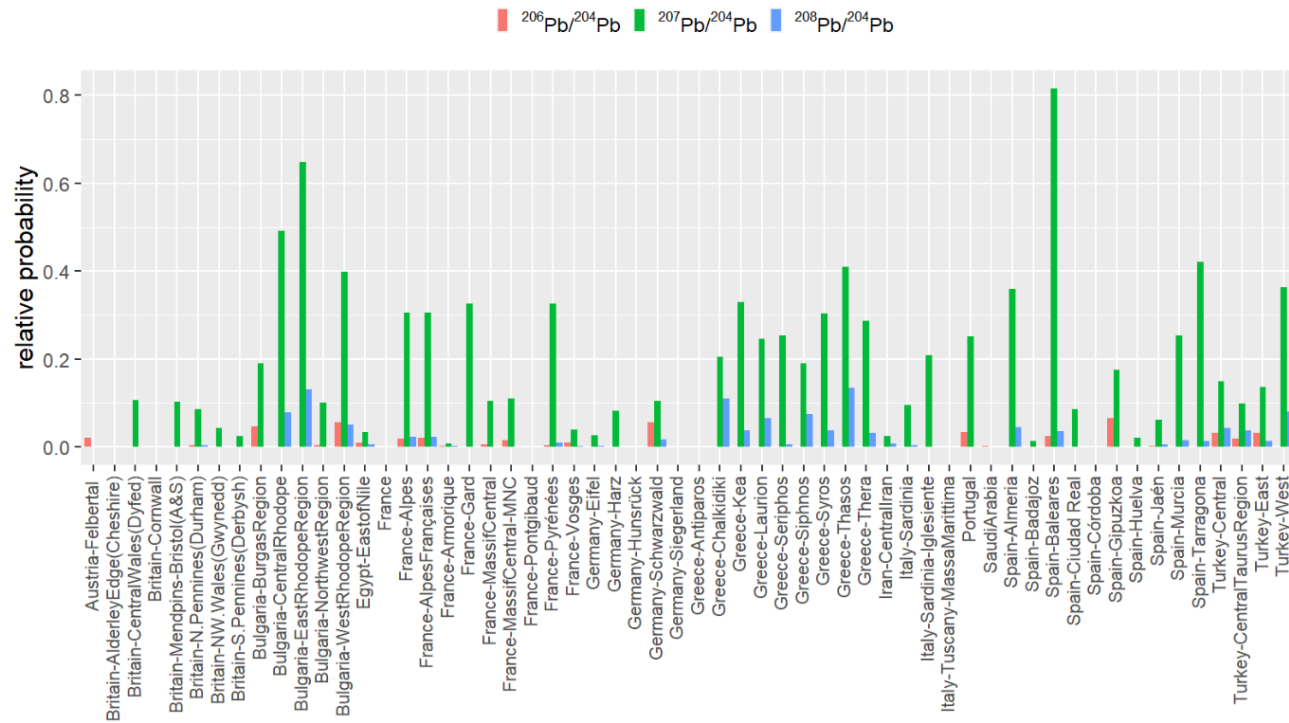

| Mining_Region                  | prob_206 | prob_207 | prob_208 | min>5%? | min |
|--------------------------------|----------|----------|----------|---------|-----|
| Austria-Felbertal              | 2%       | 0%       | 0%       | 0       | 0%  |
| Britain-AlderleyEdge(Cheshire) | 0%       | 0%       | 0%       | 0       | 0%  |
| Britain-CentralWales(Dyfed)    | 0%       | 11%      | 0%       | 0       | 0%  |
| Britain-Cornwall               | 0%       | 0%       | 0%       | 0       | 0%  |
| Britain-Mendips-Bristol(A&S)   | 0%       | 10%      | 0%       | 0       | 0%  |
| Britain-N.Pennines(Durham)     | 0%       | 9%       | 0%       | 0       | 0%  |
| Britain-NW.Wales(Gwynedd)      | 0%       | 4%       | 0%       | 0       | 0%  |
| Britain-S.Pennines(Derbysh)    | 0%       | 2%       | 0%       | 0       | 0%  |
| Bulgaria-BurgasRegion          | 5%       | 19%      | 0%       | 0       | 0%  |
| Bulgaria-CentralRhodope        | 0%       | 49%      | 8%       | 0       | 0%  |
| Bulgaria-EastRhodopeRegion     | 0%       | 65%      | 13%      | 0       | 0%  |
| Bulgaria-NorthwestRegion       | 0%       | 10%      | 0%       | 0       | 0%  |
| Bulgaria-WestRhodopeRegion     | 6%       | 40%      | 5%       | 1       | 5%  |
| Egypt-EastofNile               | 1%       | 3%       | 0%       | 0       | 0%  |
| France                         | 0%       | 0%       | 0%       | 0       | 0%  |
| France-Alpes                   | 2%       | 30%      | 2%       | 0       | 2%  |
| France-AlpesFrançaises         | 2%       | 30%      | 2%       | 0       | 2%  |
| France-Armorique               | 0%       | 1%       | 0%       | 0       | 0%  |
| France-Gard                    | 0%       | 33%      | 0%       | 0       | 0%  |
| France-MassifCentral           | 1%       | 10%      | 0%       | 0       | 0%  |
| France-MassifCentral-MNC       | 1%       | 11%      | 0%       | 0       | 0%  |
| France-Pontgibaud              | 0%       | 0%       | 0%       | 0       | 0%  |
| France-Pyrénées                | 0%       | 33%      | 1%       | 0       | 0%  |
| France-Vosges                  | 1%       | 4%       | 0%       | 0       | 0%  |
| Germany-Eifel                  | 0%       | 3%       | 0%       | 0       | 0%  |
| Germany-Harz                   | 0%       | 8%       | 0%       | 0       | 0%  |
| Germany-Hunsrück               | 0%       | 0%       | 0%       | 0       | 0%  |
| Germany-Schwarzwald            | 6%       | 10%      | 2%       | 0       | 2%  |
| Germany-Siegerland             | 0%       | 0%       | 0%       | 0       | 0%  |
| Greece-Antiparos               | 0%       | 0%       | 0%       | 0       | 0%  |
| Greece-Chalkidiki              | 0%       | 21%      | 11%      | 0       | 0%  |
| Greece-Kea                     | 0%       | 33%      | 4%       | 0       | 0%  |
| Greece-Laurion                 | 0%       | 25%      | 7%       | 0       | 0%  |
| Greece-Seriphos                | 0%       | 25%      | 1%       | 0       | 0%  |
| Greece-Siphnos                 | 0%       | 19%      | 7%       | 0       | 0%  |
| Greece-Syros                   | 0%       | 30%      | 4%       | 0       | 0%  |
| Greece-Thasos                  | 0%       | 41%      | 13%      | 0       | 0%  |
| Greece-Thera                   | 0%       | 29%      | 3%       | 0       | 0%  |
| Iran-Centrallran               | 0%       | 2%       | 1%       | 0       | 0%  |
| Italy-Sardinia                 | 0%       | 10%      | 0%       | 0       | 0%  |
| Italy-Sardinia-Iglesiente      | 0%       | 21%      | 0%       | 0       | 0%  |
| Italy-Tuscany-MassaMarittima   | 0%       | 0%       | 0%       | 0       | 0%  |
| Portugal                       | 3%       | 25%      | 0%       | 0       | 0%  |
| SaudiArabia                    | 0%       | 0%       | 0%       | 0       | 0%  |
| Spain-Almeria                  | 0%       | 36%      | 4%       | 0       | 0%  |
| Spain-Badajoz                  | 0%       | 1%       | 0%       | 0       | 0%  |
| Spain-Baleares                 | 2%       | 82%      | 4%       | 0       | 2%  |
| Spain-Ciudad Real              | 0%       | 9%       | 0%       | 0       | 0%  |
| Spain-Córdoba                  | 0%       | 0%       | 0%       | 0       | 0%  |
| Spain-Gipuzkoa                 | 7%       | 18%      | 0%       | 0       | 0%  |
| Spain-Huelva                   | 0%       | 2%       | 0%       | 0       | 0%  |
| Spain-Jaén                     | 0%       | 6%       | 1%       | 0       | 0%  |
| Spain-Murcia                   | 0%       | 25%      | 1%       | 0       | 0%  |
| Spain-Tarragona                | 0%       | 42%      | 1%       | 0       | 0%  |
| Turkey-Central                 | 3%       | 15%      | 4%       | 0       | 3%  |
| Turkey-CentralTaurusRegion     | 2%       | 10%      | 4%       | 0       | 2%  |
| Turkey-East                    | 3%       | 14%      | 1%       | 0       | 1%  |
| Turkey-West                    | 0%       | 36%      | 8%       | 0       | 0%  |

Group5: Bulgaria-Siphnos-Spain-Turkey

1-Denarius-44-5

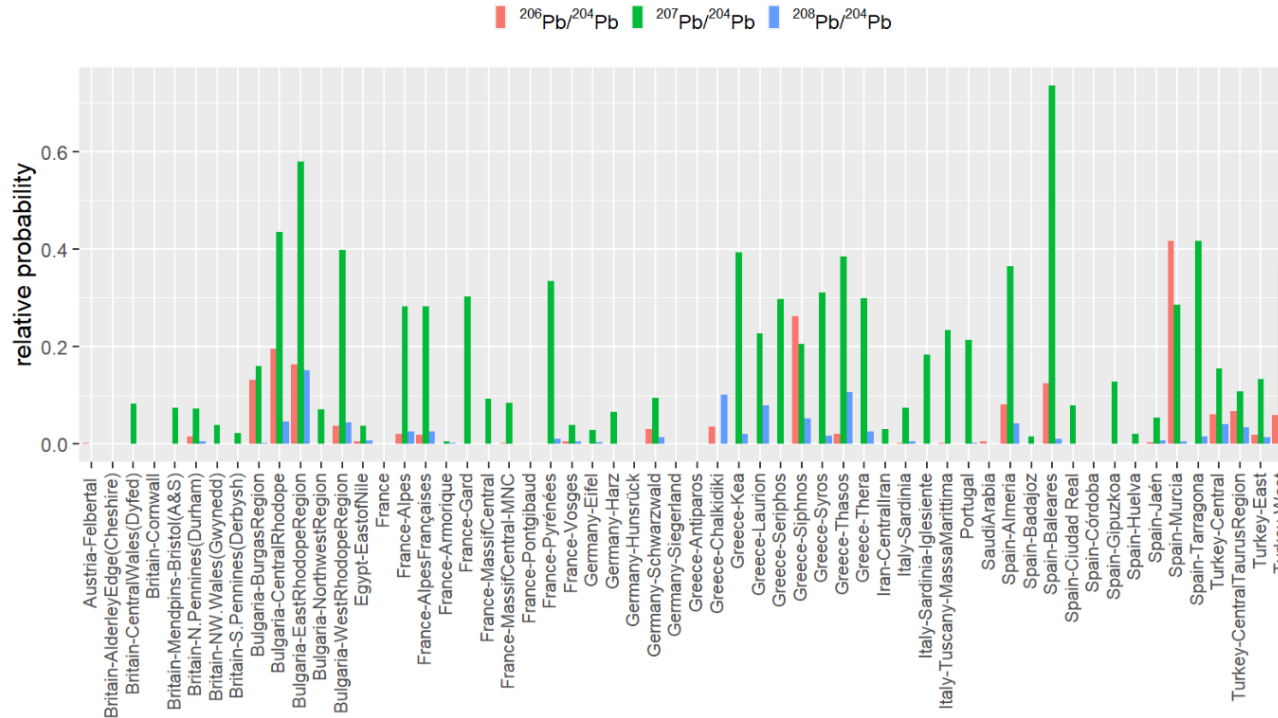

| Mining_Region                  | prob_206 | prob_207 | prob_208 | min>5%? | min |
|--------------------------------|----------|----------|----------|---------|-----|
| Austria-Felbertal              | 0%       | 0%       | 0%       |         | 0   |
| Britain-AlderleyEdge(Cheshire) | 0%       | 0%       | 0%       |         | 0   |
| Britain-CentralWales(Dyfed)    | 0%       | 8%       | 0%       |         | 0   |
| Britain-Cornwall               | 0%       | 0%       | 0%       |         | 0   |
| Britain-Mendpins-Bristol(A&S)  | 0%       | 7%       | 0%       |         | 0   |
| Britain-N.Pennines(Durham)     | 2%       | 7%       | 1%       |         | 0   |
| Britain-NW.Wales(Gwynedd)      | 0%       | 4%       | 0%       |         | 0   |
| Britain-S.Pennines(Derbysh)    | 0%       | 2%       | 0%       |         | 0   |
| Bulgaria-BurgasRegion          | 13%      | 16%      | 0%       |         | 0   |
| Bulgaria-CentralRhodope        | 19%      | 44%      | 5%       |         | 5%  |
| Bulgaria-EastRhodopeRegion     | 16%      | 58%      | 15%      | 1       | 15% |
| Bulgaria-NorthwestRegion       | 0%       | 7%       | 0%       |         | 0   |
| Bulgaria-WestRhodopeRegion     | 4%       | 40%      | 4%       |         | 4%  |
| Egypt-EastofNile               | 0%       | 4%       | 1%       |         | 0   |
| France                         | 0%       | 0%       | 0%       |         | 0   |
| France-Alpes                   | 2%       | 28%      | 2%       |         | 2%  |
| France-AlpesFrançaises         | 2%       | 28%      | 2%       |         | 2%  |
| France-Armorique               | 0%       | 0%       | 0%       |         | 0   |
| France-Gard                    | 0%       | 30%      | 0%       |         | 0   |
| France-MassifCentral           | 0%       | 9%       | 0%       |         | 0   |
| France-MassifCentral-MNC       | 0%       | 8%       | 0%       |         | 0   |
| France-Pontgibaud              | 0%       | 0%       | 0%       |         | 0   |
| France-Pyrénées                | 0%       | 33%      | 1%       |         | 0   |
| France-Vosges                  | 1%       | 4%       | 1%       |         | 1%  |
| Germany-Eifel                  | 0%       | 3%       | 0%       |         | 0   |
| Germany-Harz                   | 0%       | 7%       | 0%       |         | 0   |
| Germany-Hunsrück               | 0%       | 0%       | 0%       |         | 0   |
| Germany-Schwarzwald            | 3%       | 9%       | 1%       |         | 1%  |
| Germany-Siegerland             | 0%       | 0%       | 0%       |         | 0   |
| Greece-Antiparos               | 0%       | 0%       | 0%       |         | 0   |
| Greece-Chalkidiki              | 4%       | 0%       | 10%      |         | 0   |
| Greece-Kea                     | 0%       | 39%      | 2%       |         | 0   |
| Greece-Laurion                 | 0%       | 23%      | 8%       |         | 0   |
| Greece-Seriphos                | 0%       | 30%      | 0%       |         | 0   |
| Greece-Siphnos                 | 26%      | 21%      | 5%       | 1       | 5%  |
| Greece-Syros                   | 0%       | 31%      | 2%       |         | 0   |
| Greece-Thasos                  | 2%       | 38%      | 11%      |         | 2%  |
| Greece-Thera                   | 0%       | 30%      | 3%       |         | 0   |
| Iran-CentrallIran              | 0%       | 3%       | 0%       |         | 0   |
| Italy-Sardinia                 | 0%       | 7%       | 1%       |         | 0   |
| Italy-Sardinia-Iglesiente      | 0%       | 18%      | 0%       |         | 0   |
| Italy-Tuscany-MassaMarittima   | 0%       | 23%      | 0%       |         | 0   |
| Portugal                       | 0%       | 21%      | 0%       |         | 0   |
| SaudiArabia                    | 1%       | 0%       | 0%       |         | 0   |
| Spain-Almeria                  | 8%       | 36%      | 4%       |         | 4%  |
| Spain-Badajoz                  | 0%       | 1%       | 0%       |         | 0   |
| Spain-Baleares                 | 12%      | 74%      | 1%       |         | 1%  |
| Spain-Ciudad Real              | 0%       | 8%       | 0%       |         | 0   |
| Spain-Córdoba                  | 0%       | 0%       | 0%       |         | 0   |
| Spain-Gipuzkoa                 | 0%       | 13%      | 0%       |         | 0   |
| Spain-Huelva                   | 0%       | 2%       | 0%       |         | 0   |
| Spain-Jaén                     | 0%       | 5%       | 1%       |         | 0   |
| Spain-Murcia                   | 42%      | 29%      | 1%       |         | 1%  |
| Spain-Tarragona                | 0%       | 42%      | 2%       |         | 0   |
| Turkey-Central                 | 6%       | 15%      | 4%       |         | 4%  |
| Turkey-CentralTaurusRegion     | 7%       | 11%      | 3%       |         | 3%  |
| Turkey-East                    | 2%       | 13%      | 1%       |         | 1%  |
| Turkey-West                    | 6%       | 36%      | 7%       | 1       | 6%  |



### 3-Victoriatus-44-1

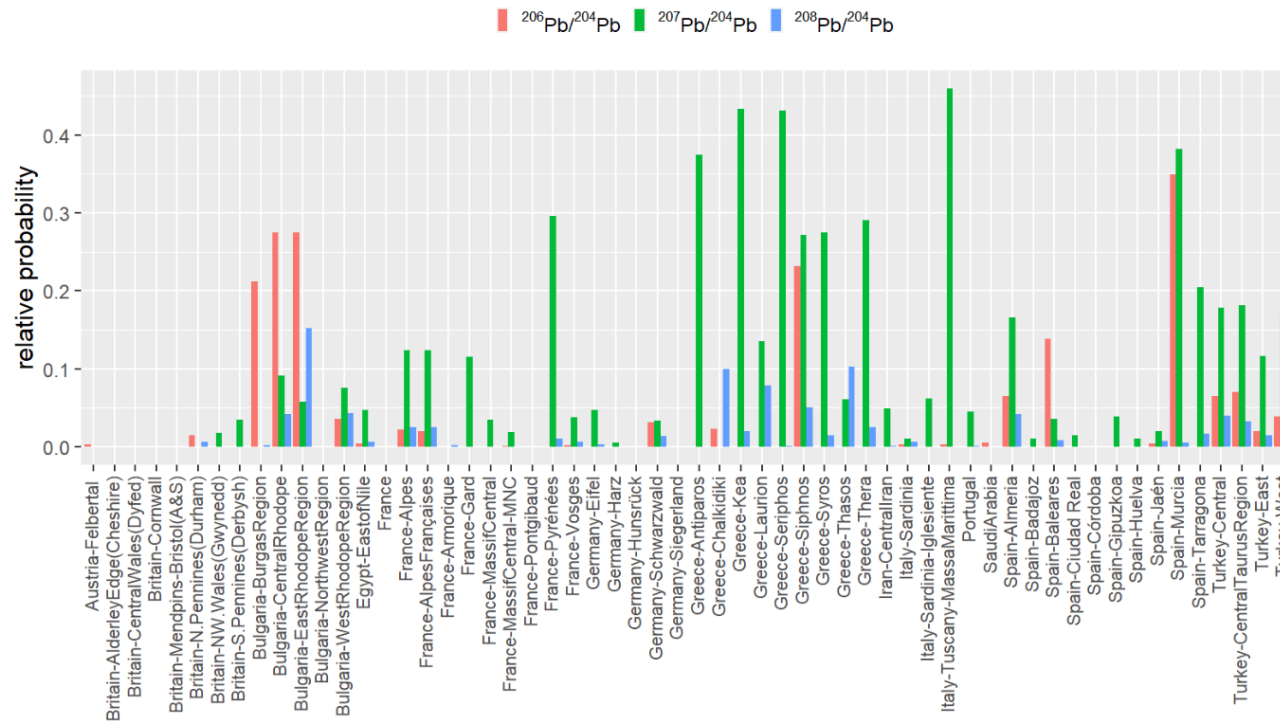

| Mining_Region                  | prob_206 | prob_207 | prob_208 | min>5%? | min |
|--------------------------------|----------|----------|----------|---------|-----|
| Austria-Felbertal              | 0%       | 0%       | 0%       | 0       | 0%  |
| Britain-AlderleyEdge(Cheshire) | 0%       | 0%       | 0%       | 0       | 0%  |
| Britain-CentralWales(Dyfed)    | 0%       | 0%       | 0%       | 0       | 0%  |
| Britain-Cornwall               | 0%       | 0%       | 0%       | 0       | 0%  |
| Britain-Mendips-Bristol(A&S)   | 0%       | 0%       | 0%       | 0       | 0%  |
| Britain-N. Pennines(Durham)    | 2%       | 0%       | 1%       | 0       | 0%  |
| Britain-NW. Wales(Gwynedd)     | 0%       | 2%       | 0%       | 0       | 0%  |
| Britain-S. Pennines(Derbysh)   | 0%       | 3%       | 0%       | 0       | 0%  |
| Bulgaria-BurgasRegion          | 21%      | 0%       | 0%       | 0       | 0%  |
| Bulgaria-CentralRhodope        | 27%      | 9%       | 4%       | 0       | 4%  |
| Bulgaria-EastRhodopeRegion     | 27%      | 6%       | 15%      | 1       | 6%  |
| Bulgaria-NorthwestRegion       | 0%       | 0%       | 0%       | 0       | 0%  |
| Bulgaria-WestRhodopeRegion     | 4%       | 8%       | 4%       | 0       | 4%  |
| Egypt-EastofNile               | 0%       | 5%       | 1%       | 0       | 0%  |
| France                         | 0%       | 0%       | 0%       | 0       | 0%  |
| France-Alpes                   | 2%       | 12%      | 2%       | 0       | 2%  |
| France-AlpesFrançaises         | 2%       | 12%      | 2%       | 0       | 2%  |
| France-Armorique               | 0%       | 0%       | 0%       | 0       | 0%  |
| France-Gard                    | 0%       | 12%      | 0%       | 0       | 0%  |
| France-MassifCentral           | 0%       | 3%       | 0%       | 0       | 0%  |
| France-MassifCentral-MNC       | 0%       | 2%       | 0%       | 0       | 0%  |
| France-Pontgibaud              | 0%       | 0%       | 0%       | 0       | 0%  |
| France-Pyrénées                | 0%       | 30%      | 1%       | 0       | 0%  |
| France-Vosges                  | 0%       | 4%       | 1%       | 0       | 0%  |
| Germany-Eifel                  | 0%       | 5%       | 0%       | 0       | 0%  |
| Germany-Harz                   | 0%       | 1%       | 0%       | 0       | 0%  |
| Germany-Hunsrück               | 0%       | 0%       | 0%       | 0       | 0%  |
| Germany-Schwarzwald            | 3%       | 3%       | 1%       | 0       | 1%  |
| Germany-Siegerland             | 0%       | 0%       | 0%       | 0       | 0%  |
| Greece-Antiparos               | 0%       | 37%      | 0%       | 0       | 0%  |
| Greece-Chalkidiki              | 2%       | 0%       | 10%      | 0       | 0%  |
| Greece-Kea                     | 0%       | 43%      | 2%       | 0       | 0%  |
| Greece-Laurion                 | 0%       | 14%      | 8%       | 0       | 0%  |
| Greece-Seriphos                | 0%       | 43%      | 0%       | 0       | 0%  |
| Greece-Siphnos                 | 23%      | 27%      | 5%       | 1       | 5%  |
| Greece-Syros                   | 0%       | 28%      | 1%       | 0       | 0%  |
| Greece-Thasos                  | 0%       | 6%       | 10%      | 0       | 0%  |
| Greece-Thera                   | 0%       | 29%      | 3%       | 0       | 0%  |
| Iran-Centrallran               | 0%       | 5%       | 0%       | 0       | 0%  |
| Italy-Sardinia                 | 0%       | 1%       | 1%       | 0       | 0%  |
| Italy-Sardinia-Iglesiente      | 0%       | 6%       | 0%       | 0       | 0%  |
| Italy-Tuscany-MassaMarittima   | 0%       | 46%      | 0%       | 0       | 0%  |
| Portugal                       | 0%       | 5%       | 0%       | 0       | 0%  |
| SaudiArabia                    | 1%       | 0%       | 0%       | 0       | 0%  |
| Spain-Almeria                  | 6%       | 17%      | 4%       | 0       | 4%  |
| Spain-Badajoz                  | 0%       | 1%       | 0%       | 0       | 0%  |
| Spain-Baleares                 | 14%      | 4%       | 1%       | 0       | 1%  |
| Spain-Ciudad Real              | 0%       | 1%       | 0%       | 0       | 0%  |
| Spain-Córdoba                  | 0%       | 0%       | 0%       | 0       | 0%  |
| Spain-Gipuzkoa                 | 0%       | 4%       | 0%       | 0       | 0%  |
| Spain-Huelva                   | 0%       | 1%       | 0%       | 0       | 0%  |
| Spain-Jaén                     | 0%       | 2%       | 1%       | 0       | 0%  |
| Spain-Murcia                   | 35%      | 38%      | 1%       | 0       | 1%  |
| Spain-Tarragona                | 0%       | 20%      | 2%       | 0       | 0%  |
| Turkey-Central                 | 7%       | 18%      | 4%       | 0       | 4%  |
| Turkey-CentralTaurusRegion     | 7%       | 18%      | 3%       | 0       | 3%  |
| Turkey-East                    | 2%       | 12%      | 1%       | 0       | 1%  |
| Turkey-West                    | 4%       | 17%      | 7%       | 0       | 4%  |

MS010

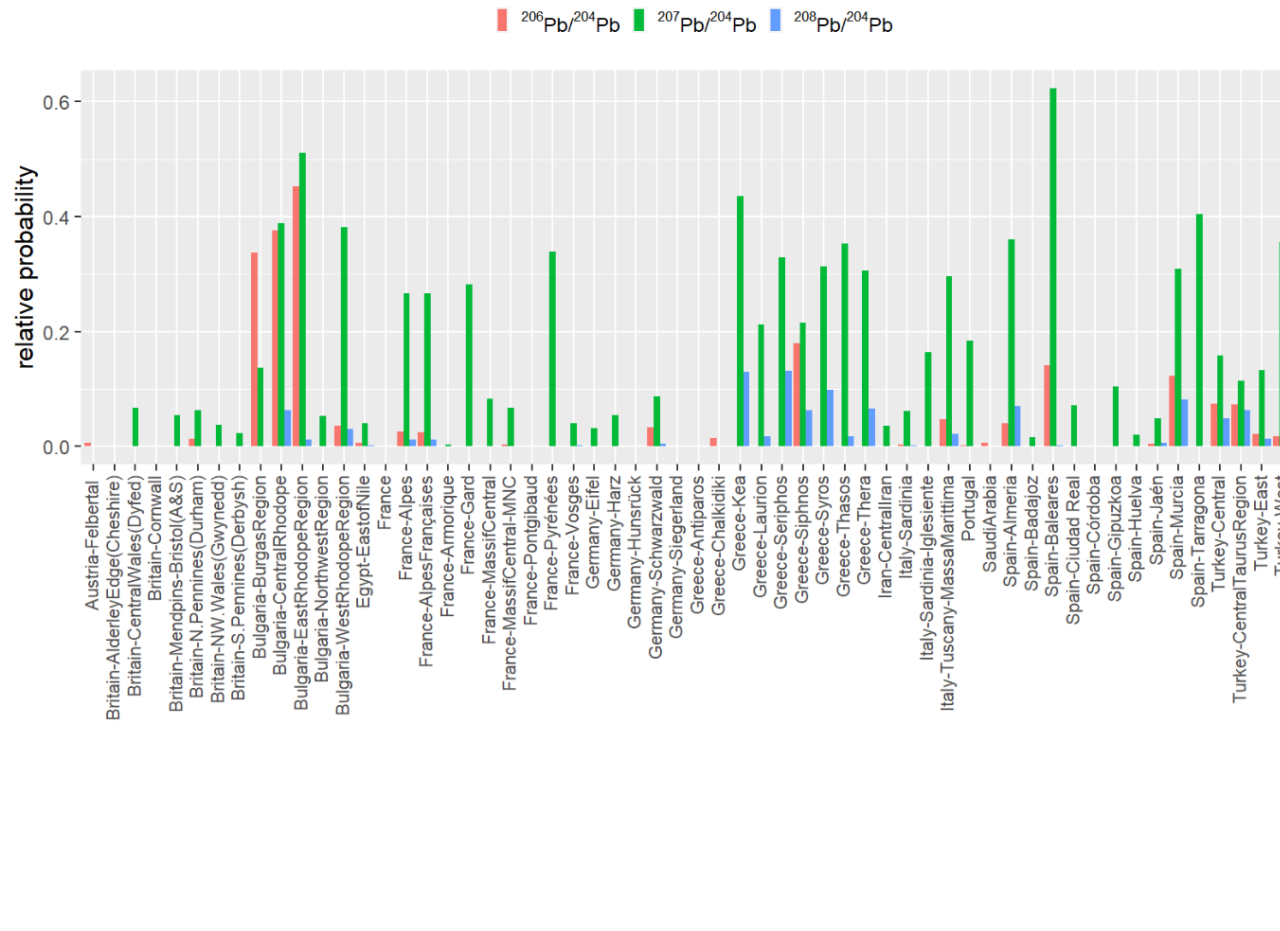

| Mining_Region                  | prob_206 | prob_207 | prob_208 | min>5%? | min |
|--------------------------------|----------|----------|----------|---------|-----|
| Austria-Felbertal              | 1%       | 0%       | 0%       | 0       | 0%  |
| Britain-AlderleyEdge(Cheshire) | 0%       | 0%       | 0%       | 0       | 0%  |
| Britain-CentralWales(Dyfed)    | 0%       | 7%       | 0%       | 0       | 0%  |
| Britain-Cornwall               | 0%       | 0%       | 0%       | 0       | 0%  |
| Britain-Mendpms-Bristol(A&S)   | 0%       | 5%       | 0%       | 0       | 0%  |
| Britain-N.Pennines(Durham)     | 1%       | 6%       | 0%       | 0       | 0%  |
| Britain-NW.Wales(Gwynedd)      | 0%       | 4%       | 0%       | 0       | 0%  |
| Britain-S.Pennines(Derbysh)    | 0%       | 2%       | 0%       | 0       | 0%  |
| Bulgaria-BurgasRegion          | 34%      | 14%      | 0%       | 0       | 0%  |
| Bulgaria-CentralRhodope        | 38%      | 39%      | 6%       | 1       | 6%  |
| Bulgaria-EastRhodopeRegion     | 45%      | 51%      | 1%       | 0       | 1%  |
| Bulgaria-NorthwestRegion       | 0%       | 5%       | 0%       | 0       | 0%  |
| Bulgaria-WestRhodopeRegion     | 4%       | 38%      | 3%       | 0       | 3%  |
| Egypt-EastofNile               | 1%       | 4%       | 0%       | 0       | 0%  |
| France                         | 0%       | 0%       | 0%       | 0       | 0%  |
| France-Alpes                   | 3%       | 27%      | 1%       | 0       | 1%  |
| France-AlpesFrançaises         | 2%       | 27%      | 1%       | 0       | 1%  |
| France-Armorique               | 0%       | 0%       | 0%       | 0       | 0%  |
| France-Gard                    | 0%       | 28%      | 0%       | 0       | 0%  |
| France-MassifCentral           | 0%       | 8%       | 0%       | 0       | 0%  |
| France-MassifCentral-MNC       | 0%       | 7%       | 0%       | 0       | 0%  |
| France-Pontgibaud              | 0%       | 0%       | 0%       | 0       | 0%  |
| France-Pyrénées                | 0%       | 34%      | 0%       | 0       | 0%  |
| France-Vosges                  | 0%       | 4%       | 0%       | 0       | 0%  |
| Germany-Eifel                  | 0%       | 3%       | 0%       | 0       | 0%  |
| Germany-Harz                   | 0%       | 5%       | 0%       | 0       | 0%  |
| Germany-Hunsrück               | 0%       | 0%       | 0%       | 0       | 0%  |
| Germany-Schwarzwald            | 3%       | 9%       | 0%       | 0       | 0%  |
| Germany-Siegerland             | 0%       | 0%       | 0%       | 0       | 0%  |
| Greece-Antiparos               | 0%       | 0%       | 0%       | 0       | 0%  |
| Greece-Chalkidiki              | 1%       | 0%       | 0%       | 0       | 0%  |
| Greece-Kea                     | 0%       | 44%      | 13%      | 0       | 0%  |
| Greece-Laurion                 | 0%       | 21%      | 2%       | 0       | 0%  |
| Greece-Seriphos                | 0%       | 33%      | 13%      | 0       | 0%  |
| Greece-Siphnos                 | 18%      | 22%      | 6%       | 1       | 6%  |
| Greece-Syros                   | 0%       | 31%      | 10%      | 0       | 0%  |
| Greece-Thasos                  | 0%       | 35%      | 2%       | 0       | 0%  |
| Greece-Thera                   | 0%       | 31%      | 7%       | 0       | 0%  |
| Iran-Centrallran               | 0%       | 4%       | 0%       | 0       | 0%  |
| Italy-Sardinia                 | 0%       | 6%       | 0%       | 0       | 0%  |
| Italy-Sardinia-Iglesiente      | 0%       | 16%      | 0%       | 0       | 0%  |
| Italy-Tuscany-MassaMarittima   | 5%       | 30%      | 2%       | 0       | 2%  |
| Portugal                       | 0%       | 18%      | 0%       | 0       | 0%  |
| SaudiArabia                    | 1%       | 0%       | 0%       | 0       | 0%  |
| Spain-Almeria                  | 4%       | 36%      | 7%       | 0       | 4%  |
| Spain-Badajoz                  | 0%       | 2%       | 0%       | 0       | 0%  |
| Spain-Baleares                 | 14%      | 62%      | 0%       | 0       | 0%  |
| Spain-Ciudad Real              | 0%       | 7%       | 0%       | 0       | 0%  |
| Spain-Córdoba                  | 0%       | 0%       | 0%       | 0       | 0%  |
| Spain-Gipuzkoa                 | 0%       | 10%      | 0%       | 0       | 0%  |
| Spain-Huelva                   | 0%       | 2%       | 0%       | 0       | 0%  |
| Spain-Jaén                     | 0%       | 5%       | 1%       | 0       | 0%  |
| Spain-Murcia                   | 12%      | 31%      | 8%       | 1       | 8%  |
| Spain-Tarragona                | 0%       | 40%      | 0%       | 0       | 0%  |
| Turkey-Central                 | 7%       | 16%      | 5%       | 0       | 5%  |
| Turkey-CentralTaurusRegion     | 7%       | 11%      | 6%       | 1       | 6%  |
| Turkey-East                    | 2%       | 13%      | 1%       | 0       | 1%  |
| Turkey-West                    | 2%       | 36%      | 3%       | 0       | 2%  |

MS014

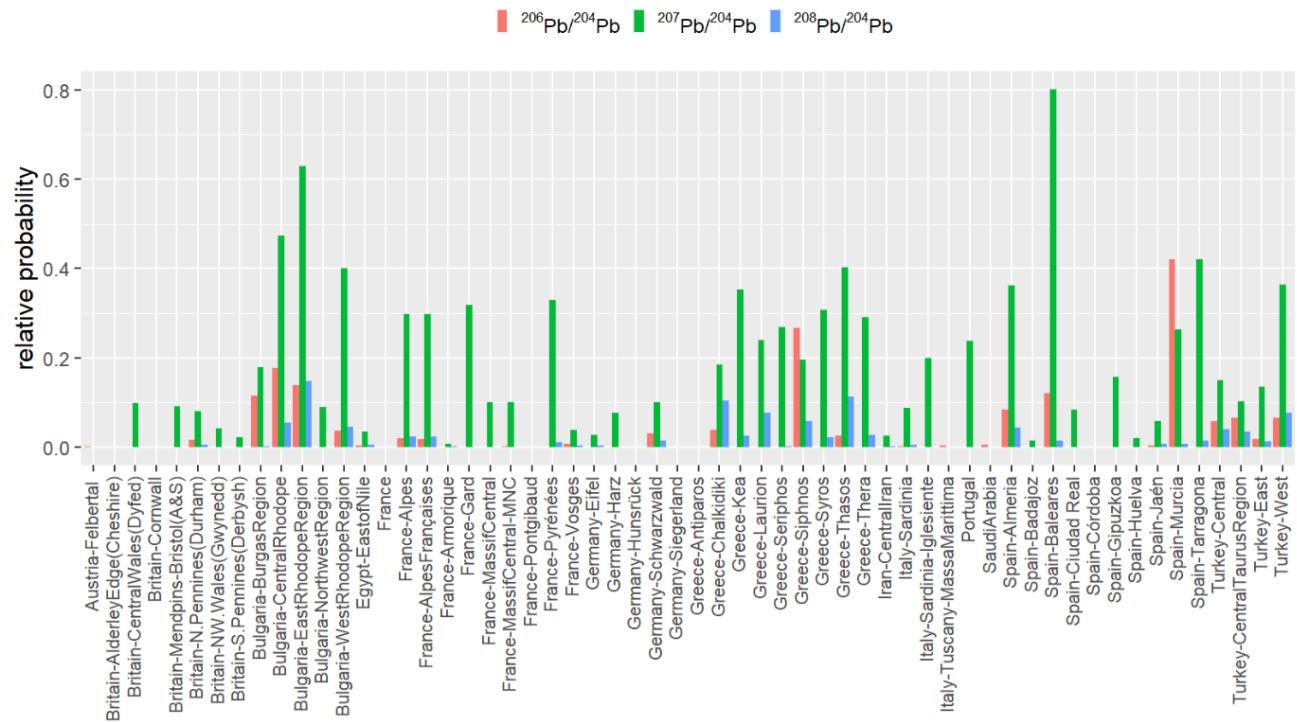

| Mining_Region                  | prob_206 | prob_207 | prob_208 | min>5%? | min |
|--------------------------------|----------|----------|----------|---------|-----|
| Austria-Felbertal              | 0%       | 0%       | 0%       | 0       | 0%  |
| Britain-AlderleyEdge(Cheshire) | 0%       | 0%       | 0%       | 0       | 0%  |
| Britain-CentralWales(Dyfed)    | 0%       | 10%      | 0%       | 0       | 0%  |
| Britain-Cornwall               | 0%       | 0%       | 0%       | 0       | 0%  |
| Britain-Mendpms-Bristol(A&S)   | 0%       | 9%       | 0%       | 0       | 0%  |
| Britain-N.Pennines(Durham)     | 2%       | 8%       | 1%       | 0       | 1%  |
| Britain-NW.Wales(Gwynedd)      | 0%       | 4%       | 0%       | 0       | 0%  |
| Britain-S.Pennines(Derbysh)    | 0%       | 2%       | 0%       | 0       | 0%  |
| Bulgaria-BurgasRegion          | 12%      | 18%      | 0%       | 0       | 0%  |
| Bulgaria-CentralRhodope        | 18%      | 47%      | 5%       | 1       | 5%  |
| Bulgaria-EastRhodopeRegion     | 14%      | 63%      | 15%      | 1       | 14% |
| Bulgaria-NorthwestRegion       | 0%       | 9%       | 0%       | 0       | 0%  |
| Bulgaria-WestRhodopeRegion     | 4%       | 40%      | 5%       | 0       | 4%  |
| Egypt-EastofNile               | 0%       | 4%       | 1%       | 0       | 0%  |
| France                         | 0%       | 0%       | 0%       | 0       | 0%  |
| France-Alpes                   | 2%       | 30%      | 2%       | 0       | 2%  |
| France-AlpesFrançaises         | 2%       | 30%      | 2%       | 0       | 2%  |
| France-Armorique               | 0%       | 1%       | 0%       | 0       | 0%  |
| France-Gard                    | 0%       | 32%      | 0%       | 0       | 0%  |
| France-MassifCentral           | 0%       | 10%      | 0%       | 0       | 0%  |
| France-MassifCentral-MNC       | 0%       | 10%      | 0%       | 0       | 0%  |
| France-Pontgibaud              | 0%       | 0%       | 0%       | 0       | 0%  |
| France-Pyrénées                | 0%       | 33%      | 1%       | 0       | 0%  |
| France-Vosges                  | 1%       | 4%       | 0%       | 0       | 0%  |
| Germany-Eifel                  | 0%       | 3%       | 0%       | 0       | 0%  |
| Germany-Harz                   | 0%       | 8%       | 0%       | 0       | 0%  |
| Germany-Hunsrück               | 0%       | 0%       | 0%       | 0       | 0%  |
| Germany-Schwarzwald            | 3%       | 10%      | 1%       | 0       | 1%  |
| Germany-Siegerland             | 0%       | 0%       | 0%       | 0       | 0%  |
| Greece-Antiparos               | 0%       | 0%       | 0%       | 0       | 0%  |
| Greece-Chalkidiki              | 4%       | 19%      | 10%      | 0       | 4%  |
| Greece-Kea                     | 0%       | 35%      | 3%       | 0       | 0%  |
| Greece-Laurion                 | 0%       | 24%      | 8%       | 0       | 0%  |
| Greece-Seriphos                | 0%       | 27%      | 0%       | 0       | 0%  |
| Greece-Siphnos                 | 27%      | 20%      | 6%       | 1       | 6%  |
| Greece-Syros                   | 0%       | 31%      | 2%       | 0       | 0%  |
| Greece-Thasos                  | 3%       | 40%      | 11%      | 0       | 3%  |
| Greece-Thera                   | 0%       | 29%      | 3%       | 0       | 0%  |
| Iran-Centrallran               | 0%       | 3%       | 0%       | 0       | 0%  |
| Italy-Sardinia                 | 0%       | 9%       | 1%       | 0       | 0%  |
| Italy-Sardinia-Iglesiente      | 0%       | 20%      | 0%       | 0       | 0%  |
| Italy-Tuscany-MassaMarittima   | 0%       | 0%       | 0%       | 0       | 0%  |
| Portugal                       | 0%       | 24%      | 0%       | 0       | 0%  |
| SaudiArabia                    | 1%       | 0%       | 0%       | 0       | 0%  |
| Spain-Almeria                  | 8%       | 36%      | 4%       | 0       | 4%  |
| Spain-Badajoz                  | 0%       | 1%       | 0%       | 0       | 0%  |
| Spain-Baleares                 | 12%      | 80%      | 1%       | 0       | 1%  |
| Spain-Ciudad Real              | 0%       | 8%       | 0%       | 0       | 0%  |
| Spain-Córdoba                  | 0%       | 0%       | 0%       | 0       | 0%  |
| Spain-Gipuzkoa                 | 0%       | 16%      | 0%       | 0       | 0%  |
| Spain-Huelva                   | 0%       | 2%       | 0%       | 0       | 0%  |
| Spain-Jaén                     | 0%       | 6%       | 1%       | 0       | 0%  |
| Spain-Murcia                   | 42%      | 26%      | 1%       | 0       | 1%  |
| Spain-Tarragona                | 0%       | 42%      | 1%       | 0       | 0%  |
| Turkey-Central                 | 6%       | 15%      | 4%       | 0       | 4%  |
| Turkey-CentralTaurusRegion     | 7%       | 10%      | 3%       | 0       | 3%  |
| Turkey-East                    | 2%       | 13%      | 1%       | 0       | 1%  |
| Turkey-West                    | 7%       | 36%      | 8%       | 1       | 7%  |

MS034

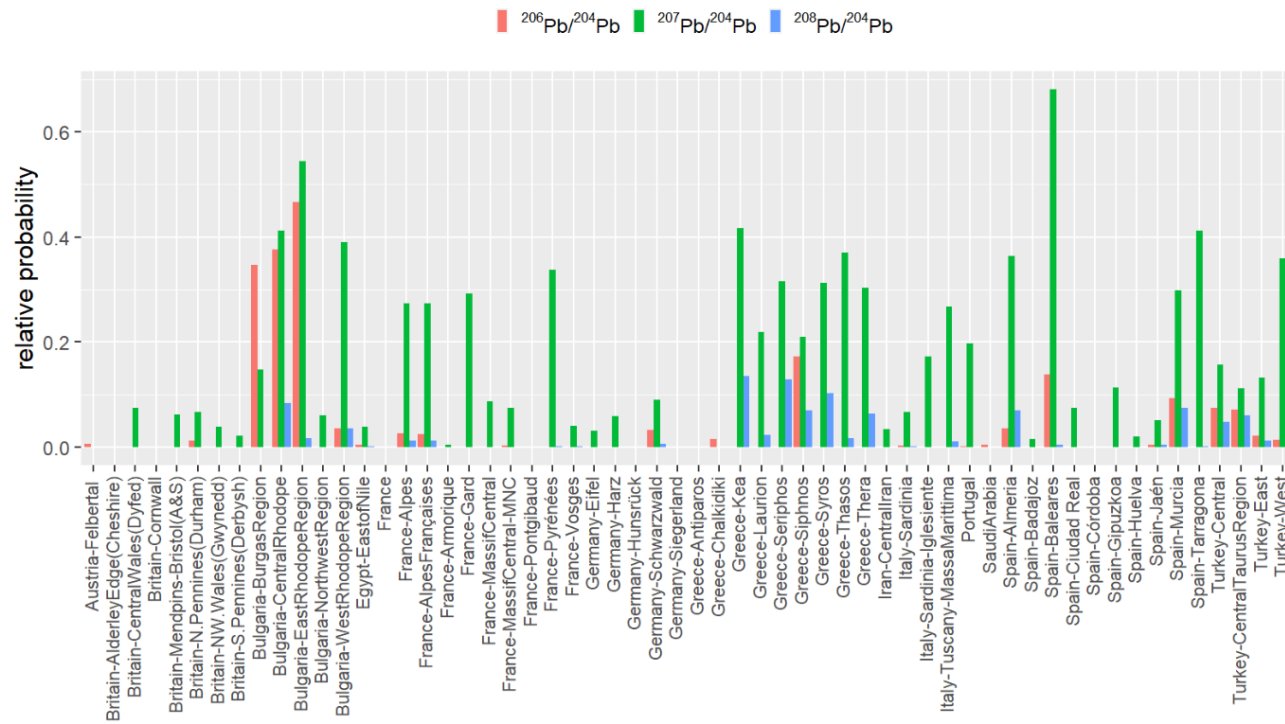

| Mining_Region                  | prob_206 | prob_207 | prob_208 | min>5%? | min |
|--------------------------------|----------|----------|----------|---------|-----|
| Austria-Felbertal              | 1%       | 0%       | 0%       | 0       | 0%  |
| Britain-AlderleyEdge(Cheshire) | 0%       | 0%       | 0%       | 0       | 0%  |
| Britain-CentralWales(Dyfed)    | 0%       | 7%       | 0%       | 0       | 0%  |
| Britain-Cornwall               | 0%       | 0%       | 0%       | 0       | 0%  |
| Britain-Mendpins-Bristol(A&S)  | 0%       | 6%       | 0%       | 0       | 0%  |
| Britain-N.Pennines(Durham)     | 1%       | 7%       | 0%       | 0       | 0%  |
| Britain-NW.Wales(Gwynedd)      | 0%       | 4%       | 0%       | 0       | 0%  |
| Britain-S.Pennines(Derbys)     | 0%       | 2%       | 0%       | 0       | 0%  |
| Bulgaria-BurgasRegion          | 35%      | 15%      | 0%       | 0       | 0%  |
| Bulgaria-CentralRhodope        | 38%      | 41%      | 8%       | 1       | 8%  |
| Bulgaria-EastRhodopeRegion     | 47%      | 54%      | 2%       | 0       | 2%  |
| Bulgaria-NorthwestRegion       | 0%       | 6%       | 0%       | 0       | 0%  |
| Bulgaria-WestRhodopeRegion     | 4%       | 39%      | 4%       | 0       | 4%  |
| Egypt-EastofNile               | 1%       | 4%       | 0%       | 0       | 0%  |
| France                         | 0%       | 0%       | 0%       | 0       | 0%  |
| France-Alpes                   | 3%       | 27%      | 1%       | 0       | 1%  |
| France-AlpesFrançaises         | 2%       | 27%      | 1%       | 0       | 1%  |
| France-Armorique               | 0%       | 0%       | 0%       | 0       | 0%  |
| France-Gard                    | 0%       | 29%      | 0%       | 0       | 0%  |
| France-MassifCentral           | 0%       | 9%       | 0%       | 0       | 0%  |
| France-MassifCentral-MNC       | 0%       | 7%       | 0%       | 0       | 0%  |
| France-Pontgibaud              | 0%       | 0%       | 0%       | 0       | 0%  |
| France-Pyrénées                | 0%       | 34%      | 0%       | 0       | 0%  |
| France-Vosges                  | 0%       | 4%       | 0%       | 0       | 0%  |
| Germany-Eifel                  | 0%       | 3%       | 0%       | 0       | 0%  |
| Germany-Harz                   | 0%       | 6%       | 0%       | 0       | 0%  |
| Germany-Hunsrück               | 0%       | 0%       | 0%       | 0       | 0%  |
| Germany-Schwarzwald            | 3%       | 9%       | 1%       | 0       | 1%  |
| Germany-Siegerland             | 0%       | 0%       | 0%       | 0       | 0%  |
| Greece-Aniiparos               | 0%       | 0%       | 0%       | 0       | 0%  |
| Greece-Chalkidiki              | 0%       | 0%       | 0%       | 0       | 0%  |
| Greece-Kea                     | 2%       | 0%       | 0%       | 0       | 0%  |
| Greece-Laurion                 | 0%       | 42%      | 14%      | 0       | 0%  |
| Greece-Seriphos                | 0%       | 22%      | 2%       | 0       | 0%  |
| Greece-Siphos                  | 0%       | 31%      | 13%      | 0       | 0%  |
| Greece-Syros                   | 17%      | 21%      | 7%       | 1       | 7%  |
| Greece-Thasos                  | 0%       | 31%      | 10%      | 0       | 0%  |
| Greece-Thera                   | 0%       | 37%      | 2%       | 0       | 0%  |
| Iran-CentralIran               | 0%       | 30%      | 6%       | 0       | 0%  |
| Italy-Sardinia                 | 0%       | 3%       | 0%       | 0       | 0%  |
| Italy-Sardinia-Iglesiente      | 0%       | 7%       | 0%       | 0       | 0%  |
| Italy-Tuscany-MassaMarittima   | 0%       | 17%      | 0%       | 0       | 0%  |
| Portugal                       | 0%       | 27%      | 1%       | 0       | 0%  |
| SaudiArabia                    | 0%       | 20%      | 0%       | 0       | 0%  |
| Spain-Almeria                  | 1%       | 0%       | 0%       | 0       | 0%  |
| Spain-Badajoz                  | 4%       | 36%      | 7%       | 0       | 4%  |
| Spain-Baleares                 | 0%       | 1%       | 0%       | 0       | 0%  |
| Spain-Ciudad Real              | 14%      | 68%      | 1%       | 0       | 1%  |
| Spain-Córdoba                  | 0%       | 7%       | 0%       | 0       | 0%  |
| Spain-Gipuzkoa                 | 0%       | 0%       | 0%       | 0       | 0%  |
| Spain-Huelva                   | 0%       | 11%      | 0%       | 0       | 0%  |
| Spain-Jaén                     | 0%       | 2%       | 0%       | 0       | 0%  |
| Spain-Murcia                   | 0%       | 5%       | 1%       | 0       | 0%  |
| Spain-Tarragona                | 9%       | 30%      | 7%       | 1       | 7%  |
| Turkey-Central                 | 0%       | 41%      | 0%       | 0       | 0%  |
| Turkey-CentralTaurusRegion     | 8%       | 16%      | 5%       | 0       | 5%  |
| Turkey-East                    | 7%       | 11%      | 6%       | 1       | 6%  |
| Turkey-West                    | 2%       | 13%      | 1%       | 0       | 1%  |
| Turkey-West                    | 1%       | 36%      | 4%       | 0       | 1%  |

MS035

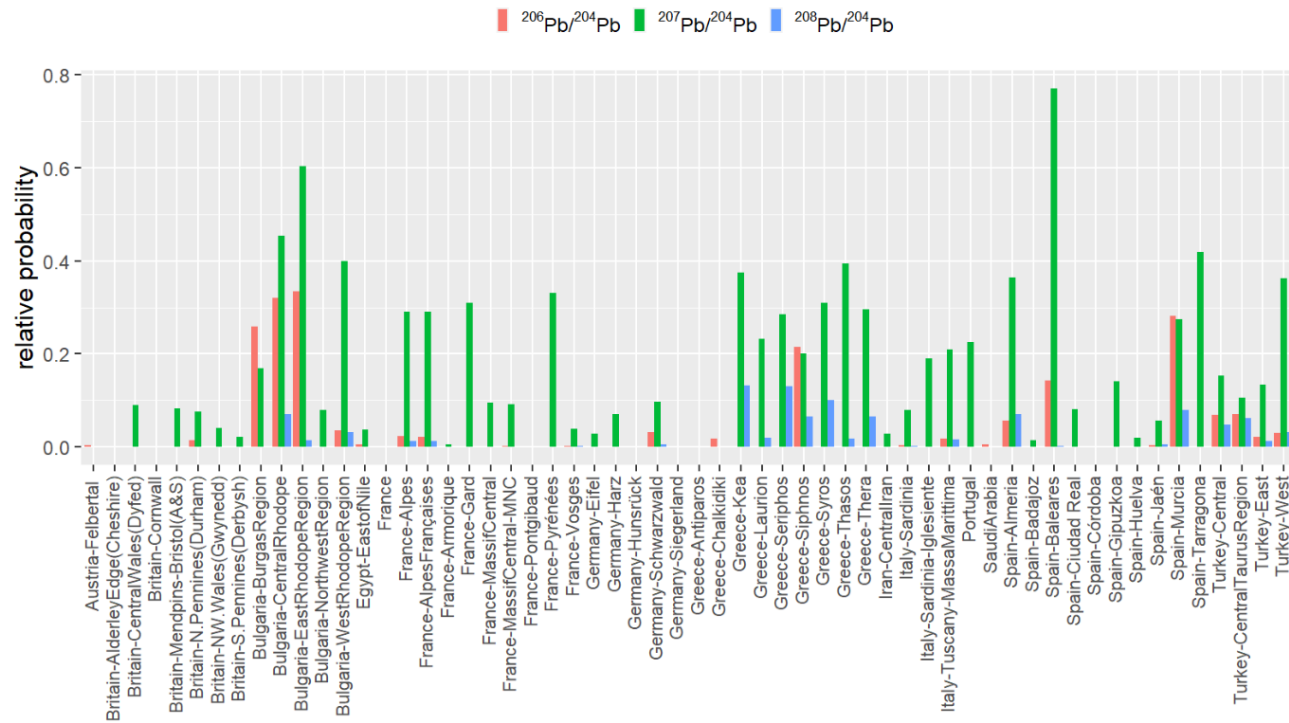

| Mining_Region                  | prob_206 | prob_207 | prob_208 | min>5%? | min |
|--------------------------------|----------|----------|----------|---------|-----|
| Austria-Felbertal              | 0%       | 0%       | 0%       | 0       | 0%  |
| Britain-AlderleyEdge(Cheshire) | 0%       | 0%       | 0%       | 0       | 0%  |
| Britain-CentralWales(Dyfed)    | 0%       | 9%       | 0%       | 0       | 0%  |
| Britain-Cornwall               | 0%       | 0%       | 0%       | 0       | 0%  |
| Britain-Mendpins-Bristol(A&S)  | 0%       | 8%       | 0%       | 0       | 0%  |
| Britain-N.Pennines(Durham)     | 1%       | 8%       | 0%       | 0       | 0%  |
| Britain-NW.Wales(Gwynedd)      | 0%       | 4%       | 0%       | 0       | 0%  |
| Britain-S.Pennines(Derbysh)    | 0%       | 2%       | 0%       | 0       | 0%  |
| Bulgaria-BurgasRegion          | 26%      | 17%      | 0%       | 0       | 0%  |
| Bulgaria-CentralRhodope        | 32%      | 45%      | 7%       | 1       | 7%  |
| Bulgaria-EastRhodopeRegion     | 33%      | 60%      | 1%       | 0       | 1%  |
| Bulgaria-NorthwestRegion       | 0%       | 8%       | 0%       | 0       | 0%  |
| Bulgaria-WestRhodopeRegion     | 4%       | 40%      | 3%       | 0       | 3%  |
| Egypt-EastofNile               | 0%       | 4%       | 0%       | 0       | 0%  |
| France                         | 0%       | 0%       | 0%       | 0       | 0%  |
| France-Alpes                   | 2%       | 29%      | 1%       | 0       | 1%  |
| France-AlpesFrançaises         | 2%       | 29%      | 1%       | 0       | 1%  |
| France-Armorique               | 0%       | 1%       | 0%       | 0       | 0%  |
| France-Gard                    | 0%       | 31%      | 0%       | 0       | 0%  |
| France-MassifCentral           | 0%       | 10%      | 0%       | 0       | 0%  |
| France-MassifCentral-MNC       | 0%       | 9%       | 0%       | 0       | 0%  |
| France-Pontgibaud              | 0%       | 0%       | 0%       | 0       | 0%  |
| France-Pyrénées                | 0%       | 33%      | 0%       | 0       | 0%  |
| France-Vosges                  | 0%       | 4%       | 0%       | 0       | 0%  |
| Germany-Eifel                  | 0%       | 3%       | 0%       | 0       | 0%  |
| Germany-Harz                   | 0%       | 7%       | 0%       | 0       | 0%  |
| Germany-Hunsrück               | 0%       | 0%       | 0%       | 0       | 0%  |
| Germany-Schwarzwald            | 3%       | 10%      | 1%       | 0       | 1%  |
| Germany-Siegerland             | 0%       | 0%       | 0%       | 0       | 0%  |
| Greece-Antiparos               | 0%       | 0%       | 0%       | 0       | 0%  |
| Greece-Chalkidiki              | 0%       | 0%       | 0%       | 0       | 0%  |
| Greece-Kea                     | 2%       | 0%       | 0%       | 0       | 0%  |
| Greece-Laurion                 | 0%       | 37%      | 13%      | 0       | 0%  |
| Greece-Seriphos                | 0%       | 23%      | 2%       | 0       | 0%  |
| Greece-Siphnos                 | 0%       | 28%      | 13%      | 0       | 0%  |
| Greece-Thera                   | 21%      | 20%      | 7%       | 1       | 7%  |
| Greece-Syros                   | 0%       | 31%      | 10%      | 0       | 0%  |
| Greece-Thasos                  | 0%       | 39%      | 2%       | 0       | 0%  |
| Greece-Tsira                   | 0%       | 30%      | 6%       | 0       | 0%  |
| Iran-CentrallIran              | 0%       | 3%       | 0%       | 0       | 0%  |
| Italy-Sardinia-Iglesiente      | 0%       | 8%       | 0%       | 0       | 0%  |
| Italy-Sardinia-Iglesiente      | 0%       | 19%      | 0%       | 0       | 0%  |
| Italy-Tuscany-MassaMarittima   | 2%       | 21%      | 2%       | 0       | 2%  |
| Portugal                       | 0%       | 22%      | 0%       | 0       | 0%  |
| SaudiArabia                    | 1%       | 0%       | 0%       | 0       | 0%  |
| Spain-Almeria                  | 6%       | 36%      | 7%       | 1       | 5%  |
| Spain-Badajoz                  | 0%       | 1%       | 0%       | 0       | 0%  |
| Spain-Baleares                 | 14%      | 77%      | 0%       | 0       | 0%  |
| Spain-Ciudad Real              | 0%       | 8%       | 0%       | 0       | 0%  |
| Spain-Córdoba                  | 0%       | 0%       | 0%       | 0       | 0%  |
| Spain-Gipuzkoa                 | 0%       | 14%      | 0%       | 0       | 0%  |
| Spain-Huelva                   | 0%       | 2%       | 0%       | 0       | 0%  |
| Spain-Jaén                     | 0%       | 6%       | 1%       | 0       | 0%  |
| Spain-Murcia                   | 28%      | 28%      | 8%       | 1       | 8%  |
| Spain-Tarragona                | 0%       | 42%      | 0%       | 0       | 0%  |
| Turkey-Central                 | 7%       | 15%      | 5%       | 0       | 5%  |
| Turkey-CentralTaurusRegion     | 7%       | 11%      | 6%       | 1       | 6%  |
| Turkey-East                    | 2%       | 13%      | 1%       | 0       | 1%  |
| Turkey-West                    | 3%       | 36%      | 3%       | 0       | 3%  |

MS055

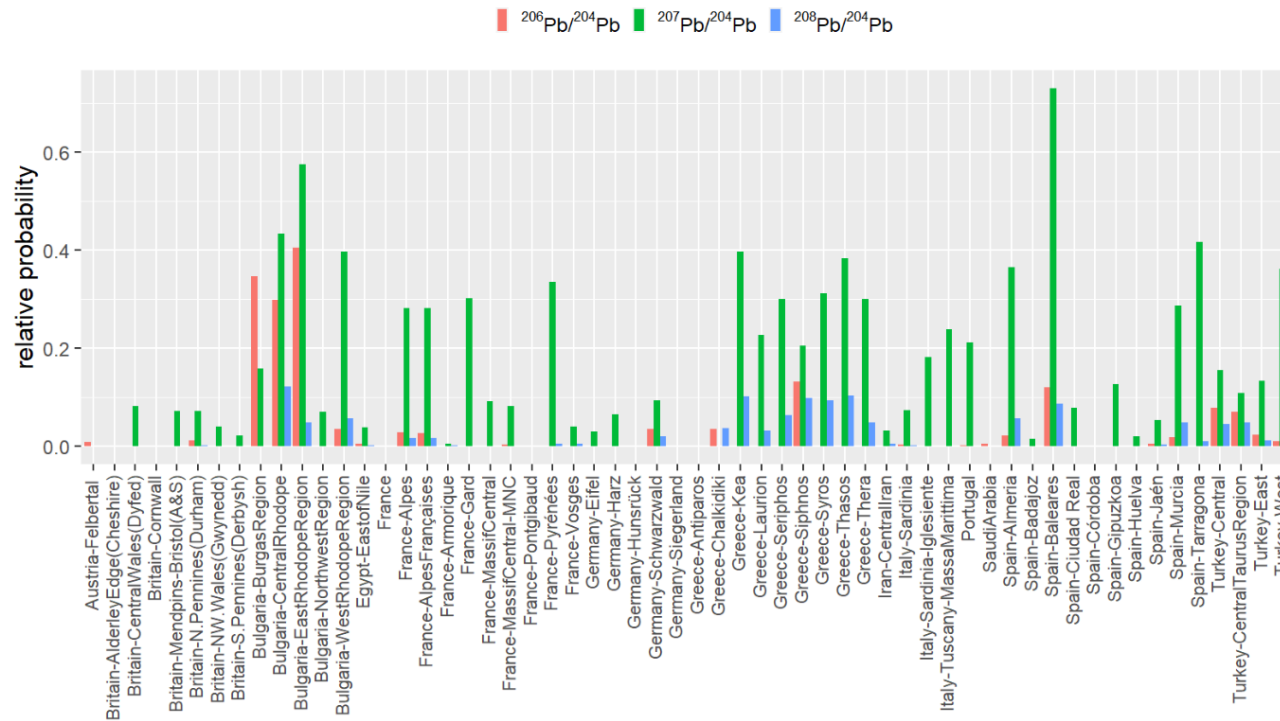

| Mining_Region                  | prob_206 | prob_207 | prob_208 | min>5%? | min |
|--------------------------------|----------|----------|----------|---------|-----|
| Austria-Felbertal              | 1%       | 0%       | 0%       | 0       | 0%  |
| Britain-AlderleyEdge(Cheshire) | 0%       | 0%       | 0%       | 0       | 0%  |
| Britain-CentralWales(Dyfed)    | 0%       | 8%       | 0%       | 0       | 0%  |
| Britain-Cornwall               | 0%       | 0%       | 0%       | 0       | 0%  |
| Britain-Mendips-Bristol(A&S)   | 0%       | 7%       | 0%       | 0       | 0%  |
| Britain-N. Pennines(Durham)    | 1%       | 7%       | 0%       | 0       | 0%  |
| Britain-NW. Wales(Gwynedd)     | 0%       | 4%       | 0%       | 0       | 0%  |
| Britain-S. Pennines(Derbysh)   | 0%       | 2%       | 0%       | 0       | 0%  |
| Bulgaria-BurgasRegion          | 35%      | 16%      | 0%       | 0       | 0%  |
| Bulgaria-CentralRhodope        | 30%      | 43%      | 12%      | 1       | 12% |
| Bulgaria-EastRhodopeRegion     | 40%      | 58%      | 5%       | 0       | 5%  |
| Bulgaria-NorthwestRegion       | 0%       | 7%       | 0%       | 0       | 0%  |
| Bulgaria-WestRhodopeRegion     | 3%       | 40%      | 6%       | 0       | 3%  |
| Egypt-EastofNile               | 1%       | 4%       | 0%       | 0       | 0%  |
| France                         | 0%       | 0%       | 0%       | 0       | 0%  |
| France-Alpes                   | 3%       | 28%      | 2%       | 0       | 2%  |
| France-AlpesFrançaises         | 3%       | 28%      | 2%       | 0       | 2%  |
| France-Armorique               | 0%       | 0%       | 0%       | 0       | 0%  |
| France-Gard                    | 0%       | 30%      | 0%       | 0       | 0%  |
| France-MassifCentral           | 0%       | 9%       | 0%       | 0       | 0%  |
| France-MassifCentral-MNC       | 0%       | 8%       | 0%       | 0       | 0%  |
| France-Pontgibaud              | 0%       | 0%       | 0%       | 0       | 0%  |
| France-Pyrénées                | 0%       | 33%      | 0%       | 0       | 0%  |
| France-Vosges                  | 0%       | 4%       | 1%       | 0       | 0%  |
| Germany-Eifel                  | 0%       | 3%       | 0%       | 0       | 0%  |
| Germany-Harz                   | 0%       | 6%       | 0%       | 0       | 0%  |
| Germany-Hunsrück               | 0%       | 0%       | 0%       | 0       | 0%  |
| Germany-Schwarzwald            | 3%       | 9%       | 2%       | 0       | 2%  |
| Germany-Siegerland             | 0%       | 0%       | 0%       | 0       | 0%  |
| Greece-Antiparos               | 0%       | 0%       | 0%       | 0       | 0%  |
| Greece-Chalkidiki              | 4%       | 0%       | 4%       | 0       | 0%  |
| Greece-Kea                     | 0%       | 40%      | 10%      | 0       | 0%  |
| Greece-Laurion                 | 0%       | 23%      | 3%       | 0       | 0%  |
| Greece-Seriphos                | 0%       | 30%      | 6%       | 0       | 0%  |
| Greece-Siphnos                 | 13%      | 21%      | 10%      | 1       | 10% |
| Greece-Syros                   | 0%       | 31%      | 9%       | 0       | 0%  |
| Greece-Thasos                  | 0%       | 38%      | 10%      | 0       | 0%  |
| Greece-Thera                   | 0%       | 30%      | 5%       | 0       | 0%  |
| Iran-Centrallran               | 0%       | 3%       | 1%       | 0       | 0%  |
| Italy-Sardinia                 | 0%       | 7%       | 0%       | 0       | 0%  |
| Italy-Sardinia-Iglesiente      | 0%       | 18%      | 0%       | 0       | 0%  |
| Italy-Tuscany-MassaMarittima   | 0%       | 24%      | 0%       | 0       | 0%  |
| Portugal                       | 0%       | 21%      | 0%       | 0       | 0%  |
| SaudiArabia                    | 1%       | 0%       | 0%       | 0       | 0%  |
| Spain-Almeria                  | 2%       | 36%      | 6%       | 0       | 2%  |
| Spain-Badajoz                  | 0%       | 1%       | 0%       | 0       | 0%  |
| Spain-Baleares                 | 12%      | 73%      | 9%       | 1       | 9%  |
| Spain-Ciudad Real              | 0%       | 8%       | 0%       | 0       | 0%  |
| Spain-Córdoba                  | 0%       | 0%       | 0%       | 0       | 0%  |
| Spain-Gipuzkoa                 | 0%       | 13%      | 0%       | 0       | 0%  |
| Spain-Huelva                   | 0%       | 2%       | 0%       | 0       | 0%  |
| Spain-Jaén                     | 0%       | 5%       | 0%       | 0       | 0%  |
| Spain-Murcia                   | 2%       | 29%      | 5%       | 0       | 2%  |
| Spain-Tarragona                | 0%       | 42%      | 1%       | 0       | 0%  |
| Turkey-Central                 | 8%       | 15%      | 5%       | 0       | 5%  |
| Turkey-CentralTaurusRegion     | 7%       | 11%      | 5%       | 0       | 5%  |
| Turkey-East                    | 2%       | 13%      | 1%       | 0       | 1%  |
| Turkey-West                    | 1%       | 36%      | 8%       | 0       | 1%  |



MS058

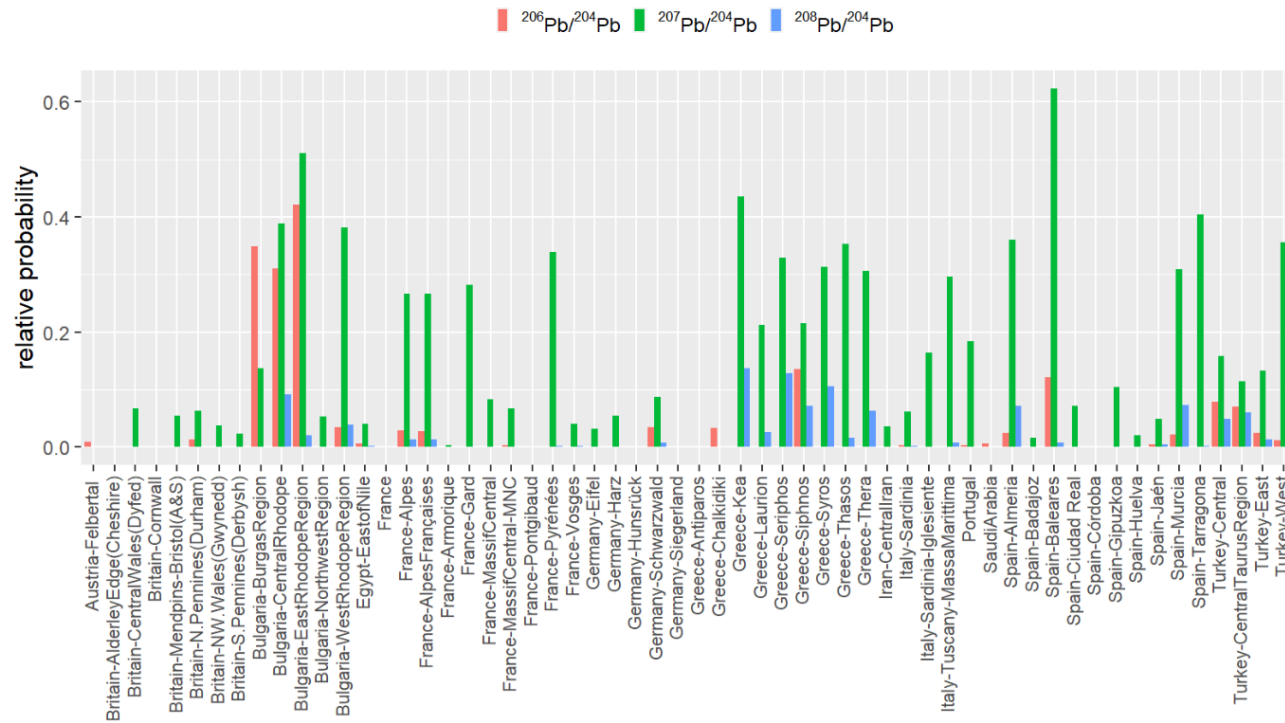

| Mining_Region                  | prob_206 | prob_207 | prob_208 | min>5%? | min |
|--------------------------------|----------|----------|----------|---------|-----|
| Austria-Felbertal              | 1%       | 0%       | 0%       | 0       | 0%  |
| Britain-AlderleyEdge(Cheshire) | 0%       | 0%       | 0%       | 0       | 0%  |
| Britain-CentralWales(Dyfed)    | 0%       | 7%       | 0%       | 0       | 0%  |
| Britain-Cornwall               | 0%       | 0%       | 0%       | 0       | 0%  |
| Britain-Mendips-Bristol(A&S)   | 0%       | 5%       | 0%       | 0       | 0%  |
| Britain-N.Pennines(Durham)     | 1%       | 6%       | 0%       | 0       | 0%  |
| Britain-NW.Wales(Gwynedd)      | 0%       | 4%       | 0%       | 0       | 0%  |
| Britain-S.Pennines(Derbysh)    | 0%       | 2%       | 0%       | 0       | 0%  |
| Bulgaria-BurgasRegion          | 35%      | 14%      | 0%       | 1       | 0%  |
| Bulgaria-CentralRhodope        | 31%      | 39%      | 9%       | 1       | 9%  |
| Bulgaria-EastRhodopeRegion     | 42%      | 51%      | 2%       | 0       | 2%  |
| Bulgaria-NorthwestRegion       | 0%       | 5%       | 0%       | 0       | 0%  |
| Bulgaria-WestRhodopeRegion     | 3%       | 38%      | 4%       | 0       | 3%  |
| Egypt-EastofNile               | 1%       | 4%       | 0%       | 0       | 0%  |
| France                         | 0%       | 0%       | 0%       | 0       | 0%  |
| France-Alpes                   | 3%       | 27%      | 1%       | 0       | 1%  |
| France-AlpesFrançaises         | 3%       | 27%      | 1%       | 0       | 1%  |
| France-Armorique               | 0%       | 0%       | 0%       | 0       | 0%  |
| France-Gard                    | 0%       | 28%      | 0%       | 0       | 0%  |
| France-MassifCentral           | 0%       | 8%       | 0%       | 0       | 0%  |
| France-MassifCentral-MNC       | 0%       | 7%       | 0%       | 0       | 0%  |
| France-Pontgibaud              | 0%       | 0%       | 0%       | 0       | 0%  |
| France-Pyrénées                | 0%       | 34%      | 0%       | 0       | 0%  |
| France-Vosges                  | 0%       | 4%       | 0%       | 0       | 0%  |
| Germany-Eifel                  | 0%       | 3%       | 0%       | 0       | 0%  |
| Germany-Harz                   | 0%       | 5%       | 0%       | 0       | 0%  |
| Germany-Hunsrück               | 0%       | 0%       | 0%       | 0       | 0%  |
| Germany-Schwarzwald            | 3%       | 9%       | 1%       | 0       | 1%  |
| Germany-Siegerland             | 0%       | 0%       | 0%       | 0       | 0%  |
| Greece-Antiparos               | 0%       | 0%       | 0%       | 0       | 0%  |
| Greece-Chalkidiki              | 3%       | 0%       | 0%       | 0       | 0%  |
| Greece-Kea                     | 0%       | 44%      | 14%      | 0       | 0%  |
| Greece-Laurion                 | 0%       | 21%      | 3%       | 0       | 0%  |
| Greece-Seriphos                | 0%       | 33%      | 13%      | 0       | 0%  |
| Greece-Siphnos                 | 14%      | 22%      | 7%       | 1       | 7%  |
| Greece-Syros                   | 0%       | 31%      | 10%      | 0       | 0%  |
| Greece-Thasos                  | 0%       | 35%      | 2%       | 0       | 0%  |
| Greece-Thera                   | 0%       | 31%      | 6%       | 0       | 0%  |
| Iran-Centrallran               | 0%       | 4%       | 0%       | 0       | 0%  |
| Italy-Sardinia                 | 0%       | 6%       | 0%       | 0       | 0%  |
| Italy-Sardinia-Iglesiente      | 0%       | 16%      | 0%       | 0       | 0%  |
| Italy-Tuscany-MassaMarittima   | 0%       | 30%      | 1%       | 0       | 0%  |
| Portugal                       | 0%       | 18%      | 0%       | 0       | 0%  |
| SaudiArabia                    | 1%       | 0%       | 0%       | 0       | 0%  |
| Spain-Almeria                  | 2%       | 36%      | 7%       | 0       | 2%  |
| Spain-Badajoz                  | 0%       | 2%       | 0%       | 0       | 0%  |
| Spain-Baleares                 | 12%      | 62%      | 1%       | 0       | 1%  |
| Spain-Ciudad Real              | 0%       | 7%       | 0%       | 0       | 0%  |
| Spain-Córdoba                  | 0%       | 0%       | 0%       | 0       | 0%  |
| Spain-Gipuzkoa                 | 0%       | 10%      | 0%       | 0       | 0%  |
| Spain-Huelva                   | 0%       | 2%       | 0%       | 0       | 0%  |
| Spain-Jaén                     | 0%       | 5%       | 0%       | 0       | 0%  |
| Spain-Murcia                   | 2%       | 31%      | 7%       | 0       | 2%  |
| Spain-Tarragona                | 0%       | 40%      | 0%       | 0       | 0%  |
| Turkey-Central                 | 8%       | 16%      | 5%       | 0       | 5%  |
| Turkey-CentralTaurusRegion     | 7%       | 11%      | 6%       | 1       | 6%  |
| Turkey-East                    | 2%       | 13%      | 1%       | 0       | 1%  |
| Turkey-West                    | 1%       | 36%      | 4%       | 0       | 1%  |

MS059

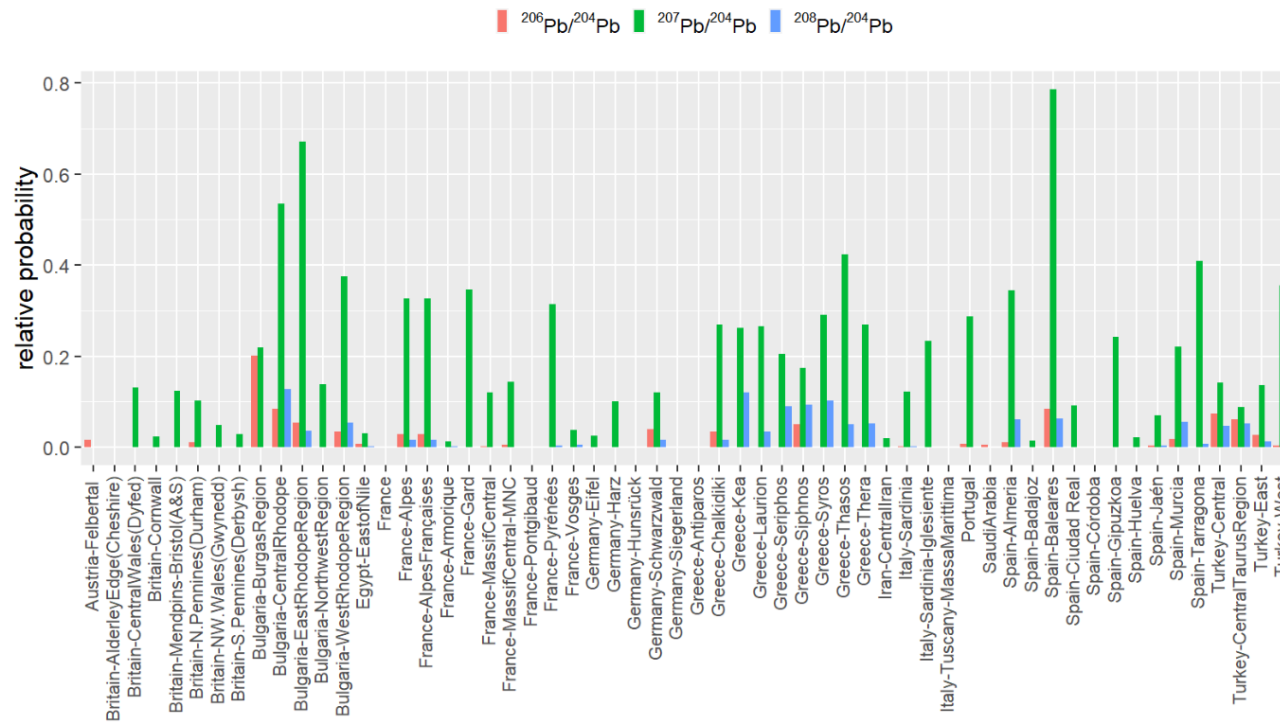

| Mining_Region                  | prob_206 | prob_207 | prob_208 | min>5%? | min |
|--------------------------------|----------|----------|----------|---------|-----|
| Austria-Felbertal              | 2%       | 0%       | 0%       | 0       | 0%  |
| Britain-AlderleyEdge(Cheshire) | 0%       | 0%       | 0%       | 0       | 0%  |
| Britain-CentralWales(Dyfed)    | 0%       | 13%      | 0%       | 0       | 0%  |
| Britain-Cornwall               | 0%       | 2%       | 0%       | 0       | 0%  |
| Britain-Mendips-Bristol(A&S)   | 0%       | 12%      | 0%       | 0       | 0%  |
| Britain-N.Pennines(Durham)     | 1%       | 10%      | 0%       | 0       | 0%  |
| Britain-NW.Wales(Gwynedd)      | 0%       | 5%       | 0%       | 0       | 0%  |
| Britain-S.Pennines(Derbysh)    | 0%       | 3%       | 0%       | 0       | 0%  |
| Bulgaria-BurgasRegion          | 20%      | 22%      | 0%       | 0       | 0%  |
| Bulgaria-CentralRhodope        | 8%       | 53%      | 13%      | 1       | 8%  |
| Bulgaria-EastRhodopeRegion     | 5%       | 67%      | 4%       | 0       | 4%  |
| Bulgaria-NorthwestRegion       | 0%       | 14%      | 0%       | 0       | 0%  |
| Bulgaria-WestRhodopeRegion     | 3%       | 37%      | 5%       | 0       | 3%  |
| Egypt-EastofNile               | 1%       | 3%       | 0%       | 0       | 0%  |
| France                         | 0%       | 0%       | 0%       | 0       | 0%  |
| France-Alpes                   | 3%       | 33%      | 2%       | 0       | 2%  |
| France-AlpesFrançaises         | 3%       | 33%      | 2%       | 0       | 2%  |
| France-Armorique               | 0%       | 1%       | 0%       | 0       | 0%  |
| France-Gard                    | 0%       | 35%      | 0%       | 0       | 0%  |
| France-MassifCentral           | 0%       | 12%      | 0%       | 0       | 0%  |
| France-MassifCentral-MNC       | 1%       | 14%      | 0%       | 0       | 0%  |
| France-Pontgibaud              | 0%       | 0%       | 0%       | 0       | 0%  |
| France-Pyrénées                | 0%       | 31%      | 0%       | 0       | 0%  |
| France-Vosges                  | 0%       | 4%       | 1%       | 0       | 0%  |
| Germany-Eifel                  | 0%       | 3%       | 0%       | 0       | 0%  |
| Germany-Harz                   | 0%       | 10%      | 0%       | 0       | 0%  |
| Germany-Hunsrück               | 0%       | 0%       | 0%       | 0       | 0%  |
| Germany-Schwarzwald            | 4%       | 12%      | 2%       | 0       | 2%  |
| Germany-Siegerland             | 0%       | 0%       | 0%       | 0       | 0%  |
| Greece-Antiparos               | 0%       | 0%       | 0%       | 0       | 0%  |
| Greece-Chalkidiki              | 3%       | 27%      | 2%       | 0       | 2%  |
| Greece-Kea                     | 0%       | 26%      | 12%      | 0       | 0%  |
| Greece-Launon                  | 0%       | 27%      | 3%       | 0       | 0%  |
| Greece-Seriphos                | 0%       | 20%      | 9%       | 0       | 0%  |
| Greece-Siphnos                 | 5%       | 17%      | 9%       | 1       | 5%  |
| Greece-Syros                   | 0%       | 29%      | 10%      | 0       | 0%  |
| Greece-Thasos                  | 0%       | 42%      | 5%       | 0       | 0%  |
| Greece-Thera                   | 0%       | 27%      | 5%       | 0       | 0%  |
| Iran-Centrallran               | 0%       | 2%       | 0%       | 0       | 0%  |
| Italy-Sardinia                 | 0%       | 12%      | 0%       | 0       | 0%  |
| Italy-Sardinia-Iglesiente      | 0%       | 23%      | 0%       | 0       | 0%  |
| Italy-Tuscany-MassaMarittima   | 0%       | 0%       | 0%       | 0       | 0%  |
| Portugal                       | 1%       | 29%      | 0%       | 0       | 0%  |
| SaudiArabia                    | 0%       | 0%       | 0%       | 0       | 0%  |
| Spain-Almeria                  | 1%       | 35%      | 6%       | 0       | 1%  |
| Spain-Badajoz                  | 0%       | 1%       | 0%       | 0       | 0%  |
| Spain-Baleares                 | 8%       | 79%      | 6%       | 1       | 6%  |
| Spain-Ciudad Real              | 0%       | 9%       | 0%       | 0       | 0%  |
| Spain-Córdoba                  | 0%       | 0%       | 0%       | 0       | 0%  |
| Spain-Gipuzkoa                 | 0%       | 24%      | 0%       | 0       | 0%  |
| Spain-Huelva                   | 0%       | 2%       | 0%       | 0       | 0%  |
| Spain-Jaén                     | 0%       | 7%       | 0%       | 0       | 0%  |
| Spain-Murcia                   | 2%       | 22%      | 6%       | 0       | 2%  |
| Spain-Tarragona                | 0%       | 41%      | 1%       | 0       | 0%  |
| Turkey-Central                 | 7%       | 14%      | 5%       | 0       | 5%  |
| Turkey-CentralTaurusRegion     | 6%       | 9%       | 5%       | 1       | 5%  |
| Turkey-East                    | 3%       | 14%      | 1%       | 0       | 1%  |
| Turkey-West                    | 0%       | 35%      | 7%       | 0       | 0%  |

MS062

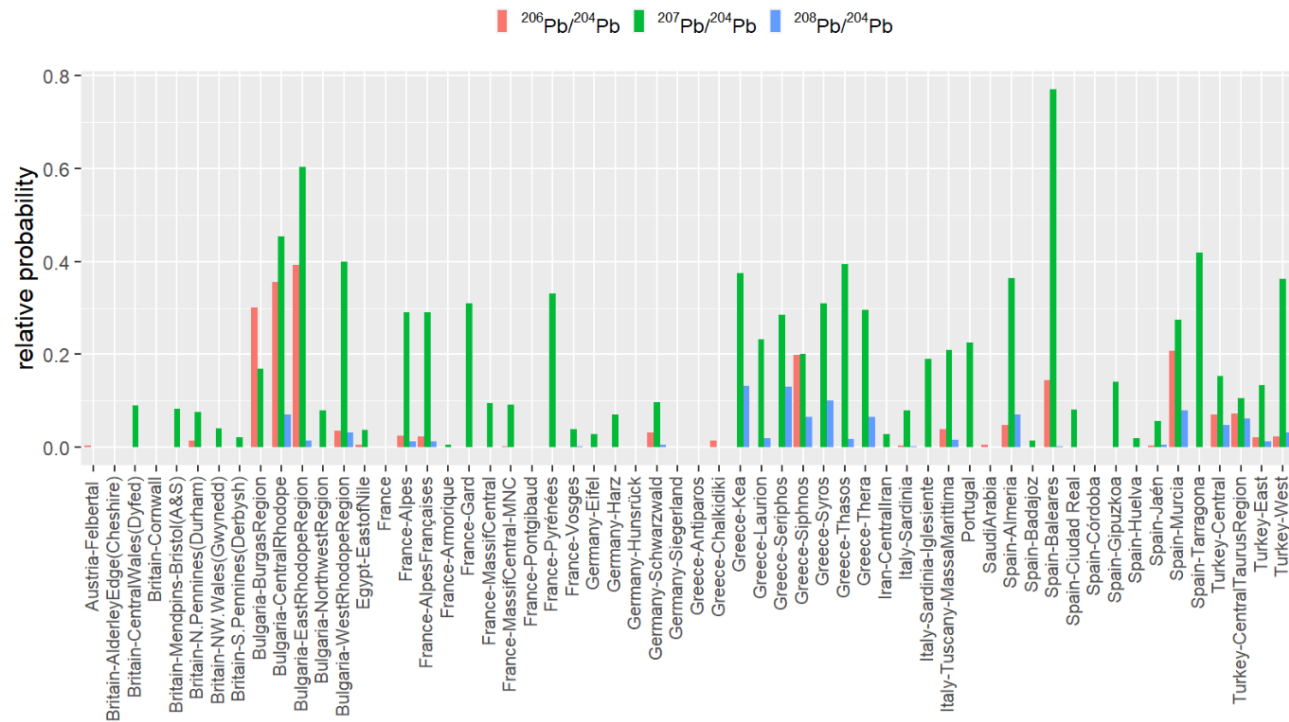

| Mining_Region                  | prob_206 | prob_207 | prob_208 | min>5%? | min |
|--------------------------------|----------|----------|----------|---------|-----|
| Austria-Felbertal              | 0%       | 0%       | 0%       | 0       | 0%  |
| Britain-AlderleyEdge(Cheshire) | 0%       | 0%       | 0%       | 0       | 0%  |
| Britain-CentralWales(Dyfed)    | 0%       | 9%       | 0%       | 0       | 0%  |
| Britain-Cornwall               | 0%       | 0%       | 0%       | 0       | 0%  |
| Britain-Mendips-Bristol(A&S)   | 0%       | 8%       | 0%       | 0       | 0%  |
| Britain-N.Pennines(Durham)     | 1%       | 8%       | 0%       | 0       | 0%  |
| Britain-NW.Wales(Gwynedd)      | 0%       | 4%       | 0%       | 0       | 0%  |
| Britain-S.Pennines(Derbysbsh)  | 0%       | 2%       | 0%       | 0       | 0%  |
| Bulgaria-BurgasRegion          | 30%      | 17%      | 0%       | 0       | 0%  |
| Bulgaria-CentralRhodope        | 36%      | 45%      | 7%       | 1       | 7%  |
| Bulgaria-EastRhodopeRegion     | 39%      | 60%      | 1%       | 0       | 1%  |
| Bulgaria-NorthwestRegion       | 0%       | 8%       | 0%       | 0       | 0%  |
| Bulgaria-WestRhodopeRegion     | 4%       | 40%      | 3%       | 0       | 3%  |
| Egypt-EastofNile               | 0%       | 4%       | 0%       | 0       | 0%  |
| France                         | 0%       | 0%       | 0%       | 0       | 0%  |
| France-Alpes                   | 2%       | 29%      | 1%       | 0       | 1%  |
| France-AlpesFrançaises         | 2%       | 29%      | 1%       | 0       | 1%  |
| France-Armorique               | 0%       | 1%       | 0%       | 0       | 0%  |
| France-Gard                    | 0%       | 31%      | 0%       | 0       | 0%  |
| France-MassifCentral           | 0%       | 10%      | 0%       | 0       | 0%  |
| France-MassifCentral-MNC       | 0%       | 9%       | 0%       | 0       | 0%  |
| France-Pontgibaud              | 0%       | 0%       | 0%       | 0       | 0%  |
| France-Pyrénées                | 0%       | 33%      | 0%       | 0       | 0%  |
| France-Vosges                  | 0%       | 4%       | 0%       | 0       | 0%  |
| Germany-Eifel                  | 0%       | 3%       | 0%       | 0       | 0%  |
| Germany-Harz                   | 0%       | 7%       | 0%       | 0       | 0%  |
| Germany-Hunsrück               | 0%       | 0%       | 0%       | 0       | 0%  |
| Germany-Schwarzwald            | 3%       | 10%      | 1%       | 0       | 1%  |
| Germany-Siegerland             | 0%       | 0%       | 0%       | 0       | 0%  |
| Greece-Antiparos               | 0%       | 0%       | 0%       | 0       | 0%  |
| Greece-Chalkidiki              | 1%       | 0%       | 0%       | 0       | 0%  |
| Greece-Kea                     | 0%       | 37%      | 13%      | 0       | 0%  |
| Greece-Laurion                 | 0%       | 23%      | 2%       | 0       | 0%  |
| Greece-Seriphos                | 0%       | 28%      | 13%      | 0       | 0%  |
| Greece-Siphos                  | 20%      | 20%      | 7%       | 1       | 7%  |
| Greece-Syros                   | 0%       | 31%      | 10%      | 0       | 0%  |
| Greece-Thasos                  | 0%       | 39%      | 2%       | 0       | 0%  |
| Greece-Thera                   | 0%       | 30%      | 6%       | 0       | 0%  |
| Iran-Centrallran               | 0%       | 3%       | 0%       | 0       | 0%  |
| Italy-Sardinia                 | 0%       | 8%       | 0%       | 0       | 0%  |
| Italy-Sardinia-Iglesiente      | 0%       | 19%      | 0%       | 0       | 0%  |
| Italy-Tuscany-MassaMarittima   | 4%       | 21%      | 2%       | 0       | 2%  |
| Portugal                       | 0%       | 22%      | 0%       | 0       | 0%  |
| SaudiArabia                    | 1%       | 0%       | 0%       | 0       | 0%  |
| Spain-Almeria                  | 5%       | 36%      | 7%       | 0       | 5%  |
| Spain-Badajoz                  | 0%       | 1%       | 0%       | 0       | 0%  |
| Spain-Baleares                 | 14%      | 77%      | 0%       | 0       | 0%  |
| Spain-Ciudad Real              | 0%       | 8%       | 0%       | 0       | 0%  |
| Spain-Córdoba                  | 0%       | 0%       | 0%       | 0       | 0%  |
| Spain-Gipuzkoa                 | 0%       | 14%      | 0%       | 0       | 0%  |
| Spain-Huelva                   | 0%       | 2%       | 0%       | 0       | 0%  |
| Spain-Jaén                     | 0%       | 6%       | 1%       | 0       | 0%  |
| Spain-Murcia                   | 21%      | 28%      | 8%       | 1       | 8%  |
| Spain-Tarragona                | 0%       | 42%      | 0%       | 0       | 0%  |
| Turkey-Central                 | 7%       | 15%      | 5%       | 0       | 5%  |
| Turkey-CentralTaurusRegion     | 7%       | 11%      | 6%       | 1       | 6%  |
| Turkey-East                    | 2%       | 13%      | 1%       | 0       | 1%  |
| Turkey-West                    | 2%       | 36%      | 3%       | 0       | 2%  |

MS063

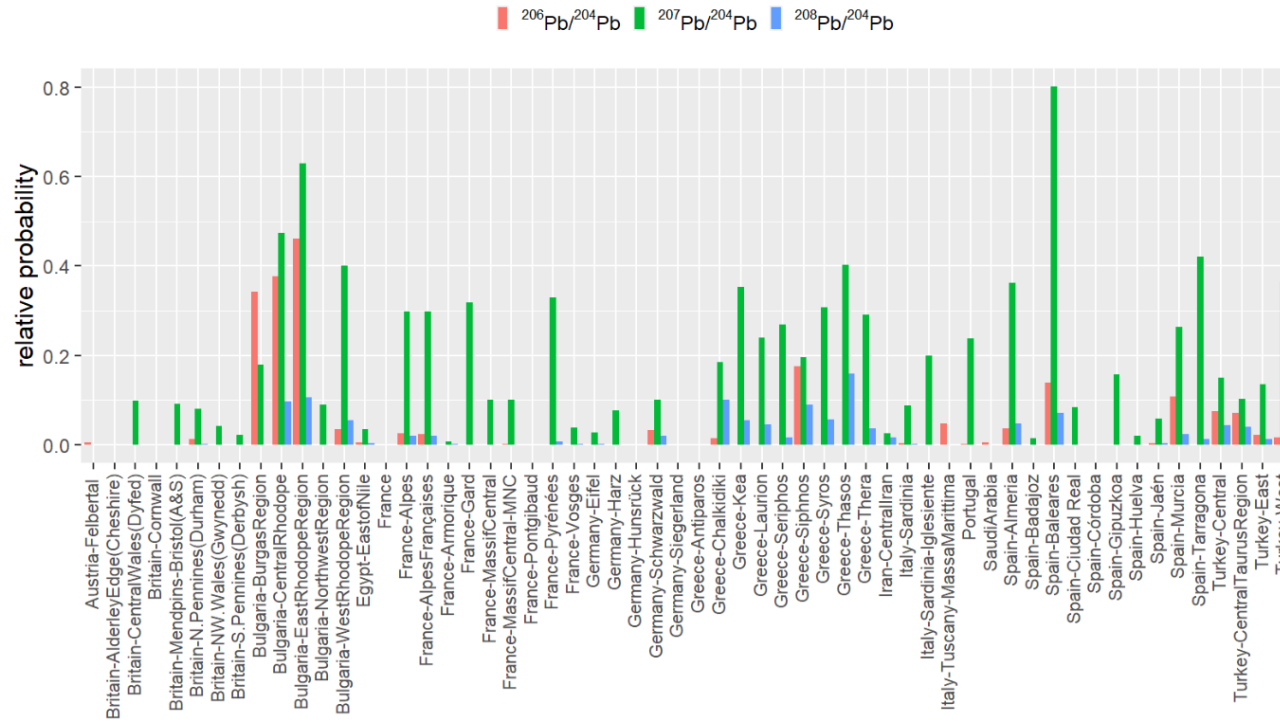

| Mining_Region                  | prob_206 | prob_207 | prob_208 | min>5%? | min |
|--------------------------------|----------|----------|----------|---------|-----|
| Austria-Felbertal              | 1%       | 0%       | 0%       | 0       | 0%  |
| Britain-AlderleyEdge(Cheshire) | 0%       | 0%       | 0%       | 0       | 0%  |
| Britain-CentralWales(Dyfed)    | 0%       | 10%      | 0%       | 0       | 0%  |
| Britain-Cornwall               | 0%       | 0%       | 0%       | 0       | 0%  |
| Britain-Mendips-Bristol(A&S)   | 0%       | 9%       | 0%       | 0       | 0%  |
| Britain-N.Pennines(Durham)     | 1%       | 8%       | 0%       | 0       | 0%  |
| Britain-NW.Wales(Gwynedd)      | 0%       | 4%       | 0%       | 0       | 0%  |
| Britain-S.Pennines(Derbys)     | 0%       | 2%       | 0%       | 0       | 0%  |
| Bulgaria-BurgasRegion          | 34%      | 18%      | 0%       | 0       | 0%  |
| Bulgaria-CentralRhodope        | 38%      | 47%      | 10%      | 1       | 10% |
| Bulgaria-EastRhodopeRegion     | 46%      | 63%      | 11%      | 1       | 11% |
| Bulgaria-NorthwestRegion       | 0%       | 9%       | 0%       | 0       | 0%  |
| Bulgaria-WestRhodopeRegion     | 4%       | 40%      | 6%       | 0       | 4%  |
| Egypt-EastofNile               | 1%       | 4%       | 0%       | 0       | 0%  |
| France                         | 0%       | 0%       | 0%       | 0       | 0%  |
| France-Alpes                   | 3%       | 30%      | 2%       | 0       | 2%  |
| France-AlpesFrançaises         | 2%       | 30%      | 2%       | 0       | 2%  |
| France-Armorique               | 0%       | 1%       | 0%       | 0       | 0%  |
| France-Gard                    | 0%       | 32%      | 0%       | 0       | 0%  |
| France-MassifCentral           | 0%       | 10%      | 0%       | 0       | 0%  |
| France-MassifCentral-MNC       | 0%       | 10%      | 0%       | 0       | 0%  |
| France-Pontgibaud              | 0%       | 0%       | 0%       | 0       | 0%  |
| France-Pyrénées                | 0%       | 33%      | 1%       | 0       | 0%  |
| France-Vosges                  | 0%       | 4%       | 0%       | 0       | 0%  |
| Germany-Eifel                  | 0%       | 3%       | 0%       | 0       | 0%  |
| Germany-Harz                   | 0%       | 8%       | 0%       | 0       | 0%  |
| Germany-Hunsrück               | 0%       | 0%       | 0%       | 0       | 0%  |
| Germany-Schwarzwald            | 3%       | 10%      | 2%       | 0       | 2%  |
| Germany-Siegerland             | 0%       | 0%       | 0%       | 0       | 0%  |
| Greece-Antiparos               | 0%       | 0%       | 0%       | 0       | 0%  |
| Greece-Chalkidiki              | 1%       | 19%      | 10%      | 0       | 1%  |
| Greece-Kea                     | 0%       | 35%      | 6%       | 0       | 0%  |
| Greece-Laurion                 | 0%       | 24%      | 5%       | 0       | 0%  |
| Greece-Seriphos                | 0%       | 27%      | 2%       | 0       | 0%  |
| Greece-Siphnos                 | 18%      | 20%      | 9%       | 1       | 9%  |
| Greece-Syros                   | 0%       | 31%      | 6%       | 0       | 0%  |
| Greece-Thasos                  | 0%       | 40%      | 16%      | 0       | 0%  |
| Greece-Thera                   | 0%       | 29%      | 4%       | 0       | 0%  |
| Iran-Centrallran               | 0%       | 3%       | 2%       | 0       | 0%  |
| Italy-Sardinia-Iglesiente      | 0%       | 9%       | 0%       | 0       | 0%  |
| Italy-Sardinia-Iglesiente      | 0%       | 20%      | 0%       | 0       | 0%  |
| Italy-Tuscany-MassaMarittima   | 5%       | 0%       | 0%       | 0       | 0%  |
| Portugal                       | 0%       | 24%      | 0%       | 0       | 0%  |
| SaudiArabia                    | 1%       | 0%       | 0%       | 0       | 0%  |
| Spain-Almeria                  | 4%       | 36%      | 5%       | 0       | 4%  |
| Spain-Badajoz                  | 0%       | 1%       | 0%       | 0       | 0%  |
| Spain-Balears                  | 14%      | 80%      | 7%       | 1       | 7%  |
| Spain-Ciudad Real              | 0%       | 8%       | 0%       | 0       | 0%  |
| Spain-Córdoba                  | 0%       | 0%       | 0%       | 0       | 0%  |
| Spain-Gipuzkoa                 | 0%       | 16%      | 0%       | 0       | 0%  |
| Spain-Huelva                   | 0%       | 2%       | 0%       | 0       | 0%  |
| Spain-Jaén                     | 0%       | 6%       | 0%       | 0       | 0%  |
| Spain-Murcia                   | 11%      | 26%      | 2%       | 0       | 2%  |
| Spain-Tarragona                | 0%       | 42%      | 1%       | 0       | 0%  |
| Turkey-Central                 | 7%       | 15%      | 4%       | 0       | 4%  |
| Turkey-CentralTaurusRegion     | 7%       | 10%      | 4%       | 0       | 4%  |
| Turkey-East                    | 2%       | 13%      | 1%       | 0       | 1%  |
| Turkey-West                    | 2%       | 36%      | 8%       | 0       | 2%  |

R82

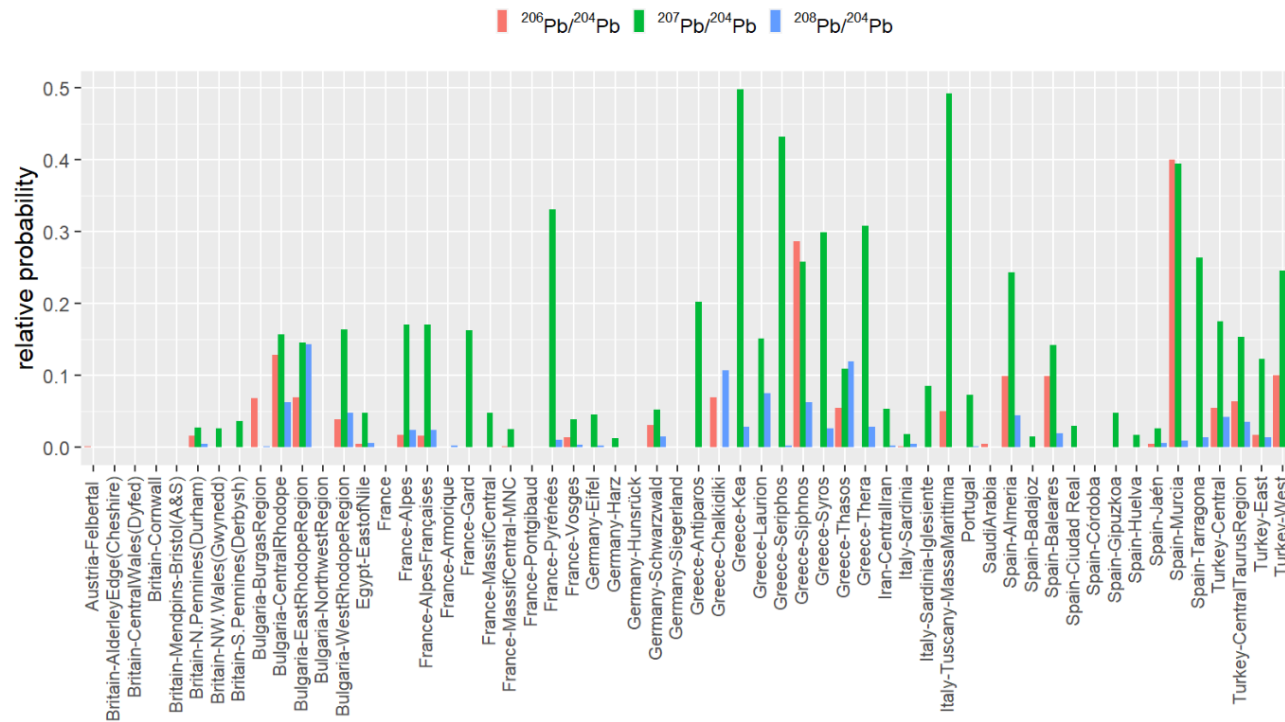

| Mining_Region                  | prob_206 | prob_207 | prob_208 | min>5%? | min |
|--------------------------------|----------|----------|----------|---------|-----|
| Austria-Felbertal              | 0%       | 0%       | 0%       | 0       | 0%  |
| Britain-AlderleyEdge(Cheshire) | 0%       | 0%       | 0%       | 0       | 0%  |
| Britain-CentralWales(Dyfed)    | 0%       | 0%       | 0%       | 0       | 0%  |
| Britain-Cornwall               | 0%       | 0%       | 0%       | 0       | 0%  |
| Britain-Mendpins-Bristol(A&S)  | 0%       | 0%       | 0%       | 0       | 0%  |
| Britain-N.Pennines(Durham)     | 2%       | 3%       | 0%       | 0       | 0%  |
| Britain-NW.Wales(Gwynedd)      | 0%       | 3%       | 0%       | 0       | 0%  |
| Britain-S.Pennines(Derbys)     | 0%       | 4%       | 0%       | 0       | 0%  |
| Bulgaria-BurgasRegion          | 7%       | 0%       | 0%       | 0       | 0%  |
| Bulgaria-CentralRhodope        | 13%      | 16%      | 6%       | 1       | 6%  |
| Bulgaria-EastRhodopeRegion     | 7%       | 15%      | 14%      | 1       | 7%  |
| Bulgaria-NorthwestRegion       | 0%       | 0%       | 0%       | 0       | 0%  |
| Bulgaria-WestRhodopeRegion     | 4%       | 16%      | 5%       | 0       | 4%  |
| Egypt-EastofNile               | 0%       | 5%       | 1%       | 0       | 0%  |
| France                         | 0%       | 0%       | 0%       | 0       | 0%  |
| France-Alpes                   | 2%       | 17%      | 2%       | 0       | 2%  |
| France-AlpesFrançaises         | 2%       | 17%      | 2%       | 0       | 2%  |
| France-Armorique               | 0%       | 0%       | 0%       | 0       | 0%  |
| France-Gard                    | 0%       | 16%      | 0%       | 0       | 0%  |
| France-MassifCentral           | 0%       | 5%       | 0%       | 0       | 0%  |
| France-MassifCentral-MNC       | 0%       | 2%       | 0%       | 0       | 0%  |
| France-Pontgibaud              | 0%       | 0%       | 0%       | 0       | 0%  |
| France-Pyrénées                | 0%       | 33%      | 1%       | 0       | 0%  |
| France-Vosges                  | 1%       | 4%       | 0%       | 0       | 0%  |
| Germany-Eifel                  | 0%       | 5%       | 0%       | 0       | 0%  |
| Germany-Harz                   | 0%       | 1%       | 0%       | 0       | 0%  |
| Germany-Hunsrück               | 0%       | 0%       | 0%       | 0       | 0%  |
| Germany-Schwarzwald            | 3%       | 5%       | 2%       | 0       | 2%  |
| Germany-Siegerland             | 0%       | 0%       | 0%       | 0       | 0%  |
| Greece-Antiparos               | 0%       | 20%      | 0%       | 0       | 0%  |
| Greece-Chalkidiki              | 7%       | 0%       | 11%      | 0       | 0%  |
| Greece-Kea                     | 0%       | 50%      | 3%       | 0       | 0%  |
| Greece-Laurion                 | 0%       | 15%      | 8%       | 0       | 0%  |
| Greece-Seriphos                | 0%       | 43%      | 0%       | 0       | 0%  |
| Greece-Siphnos                 | 29%      | 26%      | 6%       | 1       | 6%  |
| Greece-Syros                   | 0%       | 30%      | 3%       | 0       | 0%  |
| Greece-Thasos                  | 5%       | 11%      | 12%      | 1       | 5%  |
| Greece-Thera                   | 0%       | 31%      | 3%       | 0       | 0%  |
| Iran-CentralIran               | 0%       | 5%       | 0%       | 0       | 0%  |
| Italy-Sardinia                 | 0%       | 2%       | 0%       | 0       | 0%  |
| Italy-Sardinia-Iglesiente      | 0%       | 9%       | 0%       | 0       | 0%  |
| Italy-Tuscany-MassaMarittima   | 5%       | 49%      | 0%       | 0       | 0%  |
| Portugal                       | 0%       | 7%       | 0%       | 0       | 0%  |
| SaudiArabia                    | 1%       | 0%       | 0%       | 0       | 0%  |
| Spain-Almeria                  | 10%      | 24%      | 4%       | 0       | 4%  |
| Spain-Badajoz                  | 0%       | 1%       | 0%       | 0       | 0%  |
| Spain-Baleares                 | 10%      | 14%      | 2%       | 0       | 2%  |
| Spain-Ciudad Real              | 0%       | 3%       | 0%       | 0       | 0%  |
| Spain-Córdoba                  | 0%       | 0%       | 0%       | 0       | 0%  |
| Spain-Gipuzkoa                 | 0%       | 5%       | 0%       | 0       | 0%  |
| Spain-Huelva                   | 0%       | 2%       | 0%       | 0       | 0%  |
| Spain-Jaén                     | 0%       | 3%       | 1%       | 0       | 0%  |
| Spain-Murcia                   | 40%      | 39%      | 1%       | 0       | 1%  |
| Spain-Tarragona                | 0%       | 26%      | 1%       | 0       | 0%  |
| Turkey-Central                 | 5%       | 17%      | 4%       | 0       | 4%  |
| Turkey-CentralTaurusRegion     | 6%       | 15%      | 4%       | 0       | 4%  |
| Turkey-East                    | 2%       | 12%      | 1%       | 0       | 1%  |
| Turkey-West                    | 10%      | 25%      | 8%       | 1       | 8%  |

R136

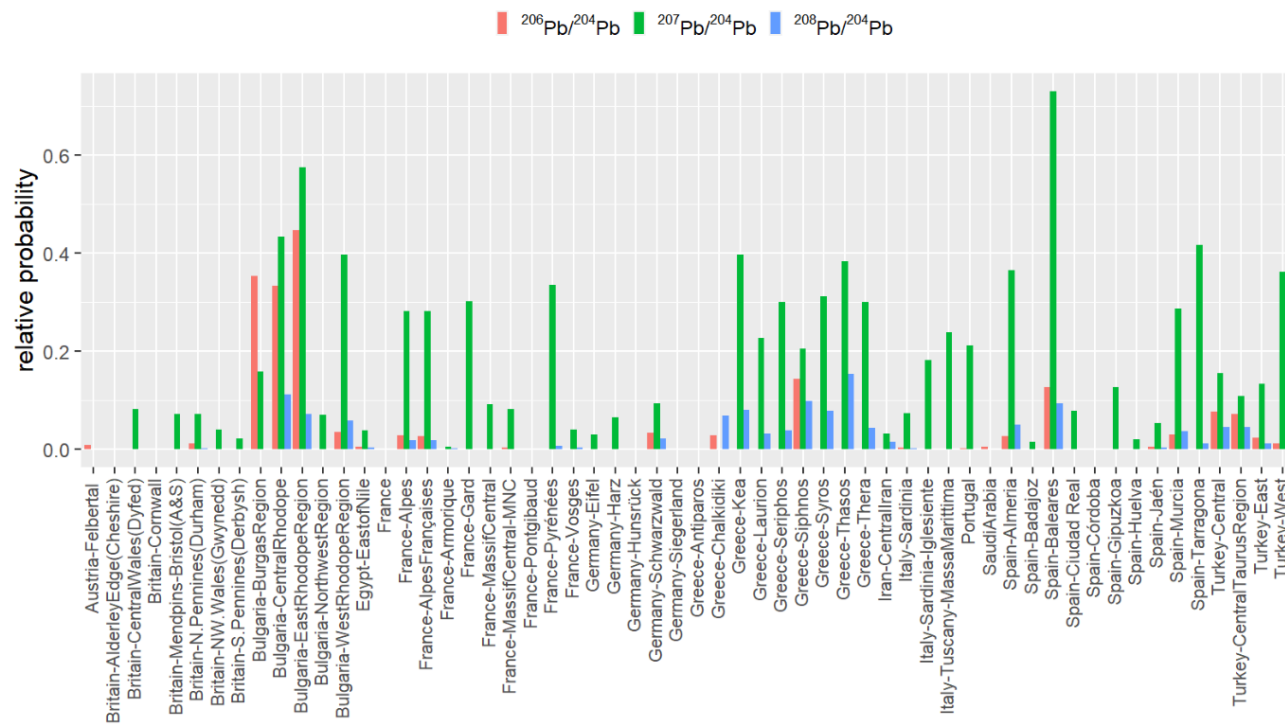

| Mining_Region                  | prob_206 | prob_207 | prob_208 | min>5%? | min |
|--------------------------------|----------|----------|----------|---------|-----|
| Austria-Felbertal              | 1%       | 0%       | 0%       | 0       | 0%  |
| Britain-AlderleyEdge(Cheshire) | 0%       | 0%       | 0%       | 0       | 0%  |
| Britain-CentralWales(Dyfed)    | 0%       | 8%       | 0%       | 0       | 0%  |
| Britain-Cornwall               | 0%       | 0%       | 0%       | 0       | 0%  |
| Britain-Mendips-Bristol(A&S)   | 0%       | 7%       | 0%       | 0       | 0%  |
| Britain-N.Pennines(Durham)     | 1%       | 7%       | 0%       | 0       | 0%  |
| Britain-NW.Wales(Gwynedd)      | 0%       | 4%       | 0%       | 0       | 0%  |
| Britain-S.Pennines(Derbysh)    | 0%       | 2%       | 0%       | 0       | 0%  |
| Bulgaria-BurgasRegion          | 35%      | 16%      | 0%       | 0       | 0%  |
| Bulgaria-CentralRhodopeRegion  | 33%      | 43%      | 11%      | 1       | 11% |
| Bulgaria-EastRhodopeRegion     | 45%      | 58%      | 7%       | 1       | 7%  |
| Bulgaria-NorthwestRegion       | 0%       | 7%       | 0%       | 0       | 0%  |
| Bulgaria-WestRhodopeRegion     | 3%       | 40%      | 6%       | 0       | 3%  |
| Egypt-EastofNile               | 1%       | 4%       | 0%       | 0       | 0%  |
| France                         | 0%       | 0%       | 0%       | 0       | 0%  |
| France-Alpes                   | 3%       | 28%      | 2%       | 0       | 2%  |
| France-AlpesFrançaises         | 3%       | 28%      | 2%       | 0       | 2%  |
| France-Armorique               | 0%       | 0%       | 0%       | 0       | 0%  |
| France-Gard                    | 0%       | 30%      | 0%       | 0       | 0%  |
| France-MassifCentral           | 0%       | 9%       | 0%       | 0       | 0%  |
| France-MassifCentral-MNC       | 0%       | 8%       | 0%       | 0       | 0%  |
| France-Pontgibaud              | 0%       | 0%       | 0%       | 0       | 0%  |
| France-Pyrénées                | 0%       | 33%      | 1%       | 0       | 0%  |
| France-Vosges                  | 0%       | 4%       | 0%       | 0       | 0%  |
| Germany-Eifel                  | 0%       | 3%       | 0%       | 0       | 0%  |
| Germany-Harz                   | 0%       | 6%       | 0%       | 0       | 0%  |
| Germany-Hunsrück               | 0%       | 0%       | 0%       | 0       | 0%  |
| Germany-Schwarzwald            | 3%       | 9%       | 2%       | 0       | 2%  |
| Germany-Siegerland             | 0%       | 0%       | 0%       | 0       | 0%  |
| Greece-Antiparos               | 0%       | 0%       | 0%       | 0       | 0%  |
| Greece-Chalkidiki              | 3%       | 0%       | 7%       | 0       | 0%  |
| Greece-Kea                     | 0%       | 40%      | 8%       | 0       | 0%  |
| Greece-Laurion                 | 0%       | 23%      | 3%       | 0       | 0%  |
| Greece-Seriphos                | 0%       | 30%      | 4%       | 0       | 0%  |
| Greece-Siphnos                 | 14%      | 21%      | 10%      | 1       | 10% |
| Greece-Syros                   | 0%       | 31%      | 8%       | 0       | 0%  |
| Greece-Thasos                  | 0%       | 38%      | 15%      | 0       | 0%  |
| Greece-Thera                   | 0%       | 30%      | 4%       | 0       | 0%  |
| Iran-Centrallran               | 0%       | 3%       | 1%       | 0       | 0%  |
| Italy-Sardinia                 | 0%       | 7%       | 0%       | 0       | 0%  |
| Italy-Sardinia-Iglesiente      | 0%       | 18%      | 0%       | 0       | 0%  |
| Italy-Tuscany-MassaMarittima   | 0%       | 24%      | 0%       | 0       | 0%  |
| Portugal                       | 0%       | 21%      | 0%       | 0       | 0%  |
| SaudiArabia                    | 1%       | 0%       | 0%       | 0       | 0%  |
| Spain-Almeria                  | 3%       | 36%      | 5%       | 0       | 3%  |
| Spain-Badajoz                  | 0%       | 1%       | 0%       | 0       | 0%  |
| Spain-Baleares                 | 13%      | 73%      | 9%       | 1       | 9%  |
| Spain-Ciudad Real              | 0%       | 8%       | 0%       | 0       | 0%  |
| Spain-Córdoba                  | 0%       | 0%       | 0%       | 0       | 0%  |
| Spain-Gipuzkoa                 | 0%       | 13%      | 0%       | 0       | 0%  |
| Spain-Huelva                   | 0%       | 2%       | 0%       | 0       | 0%  |
| Spain-Jaén                     | 0%       | 5%       | 0%       | 0       | 0%  |
| Spain-Murcia                   | 3%       | 29%      | 4%       | 0       | 3%  |
| Spain-Tarragona                | 0%       | 42%      | 1%       | 0       | 0%  |
| Turkey-Central                 | 8%       | 15%      | 5%       | 0       | 5%  |
| Turkey-CentralTaurusRegion     | 7%       | 11%      | 4%       | 0       | 4%  |
| Turkey-East                    | 2%       | 13%      | 1%       | 0       | 1%  |
| Turkey-West                    | 1%       | 36%      | 8%       | 0       | 1%  |



Group6: Outliers, mixed, recycled?

a. Iran

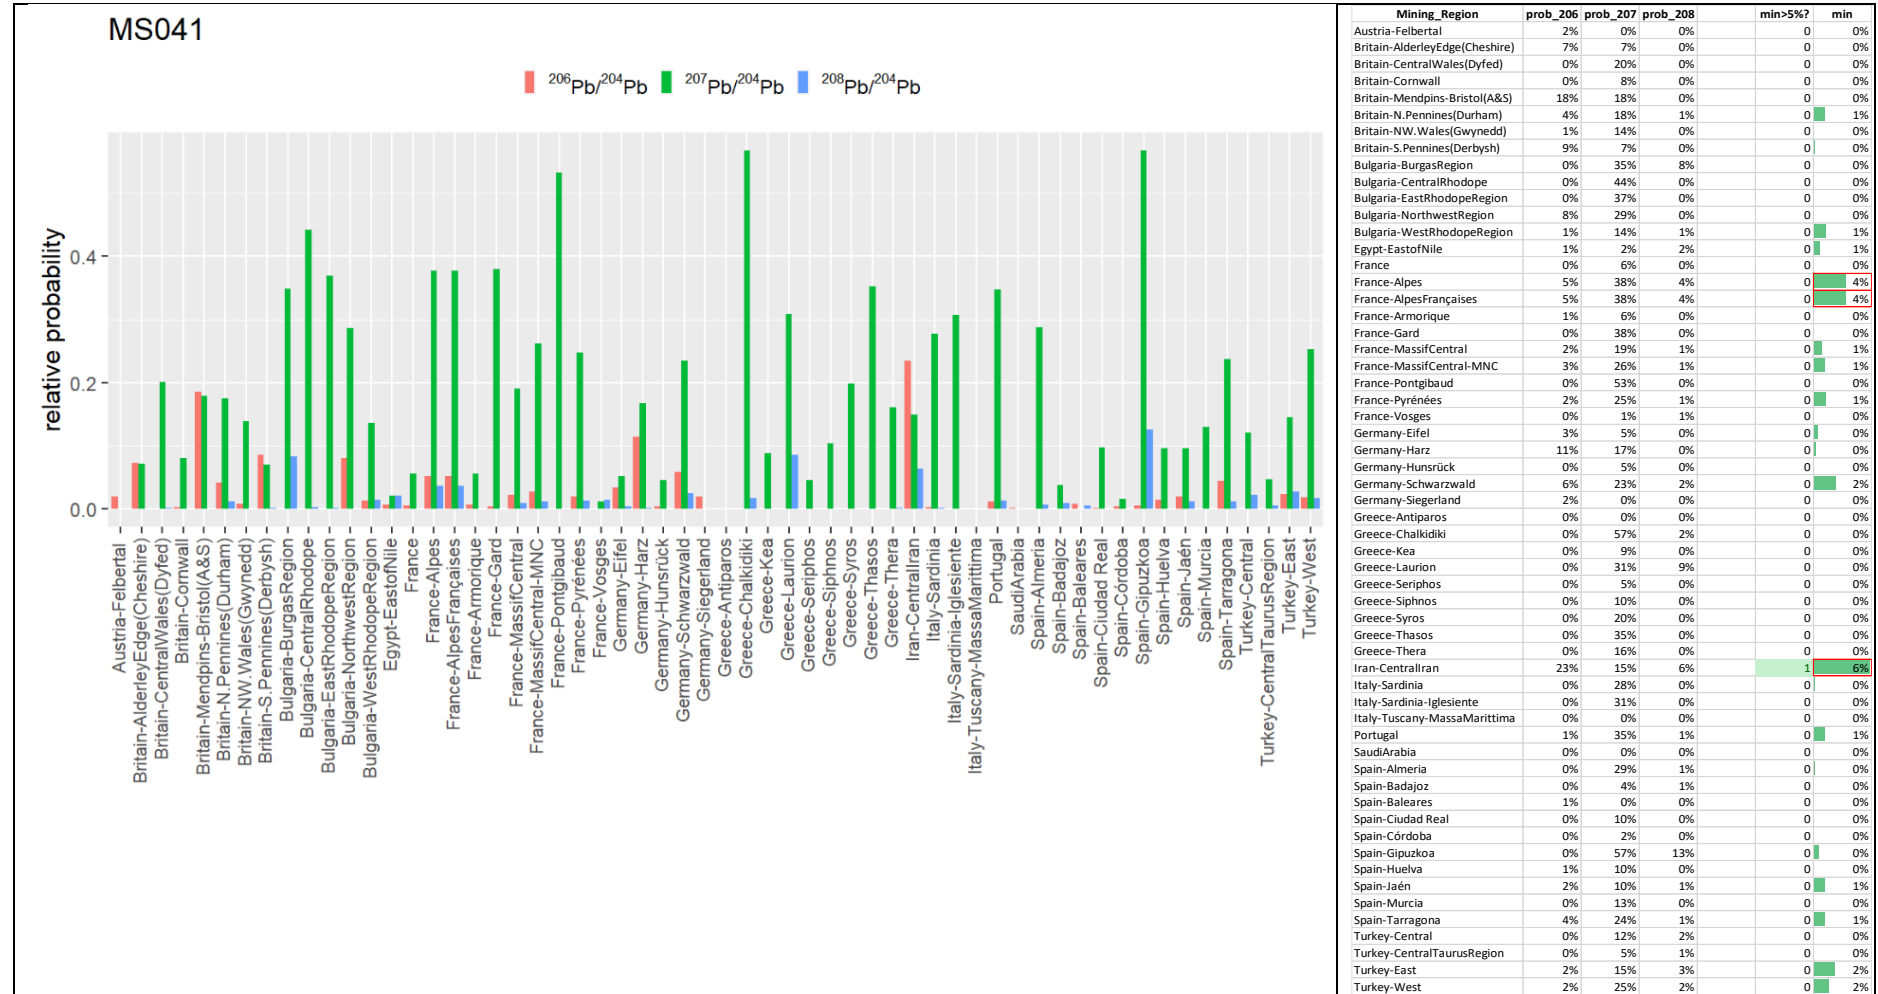

MS051

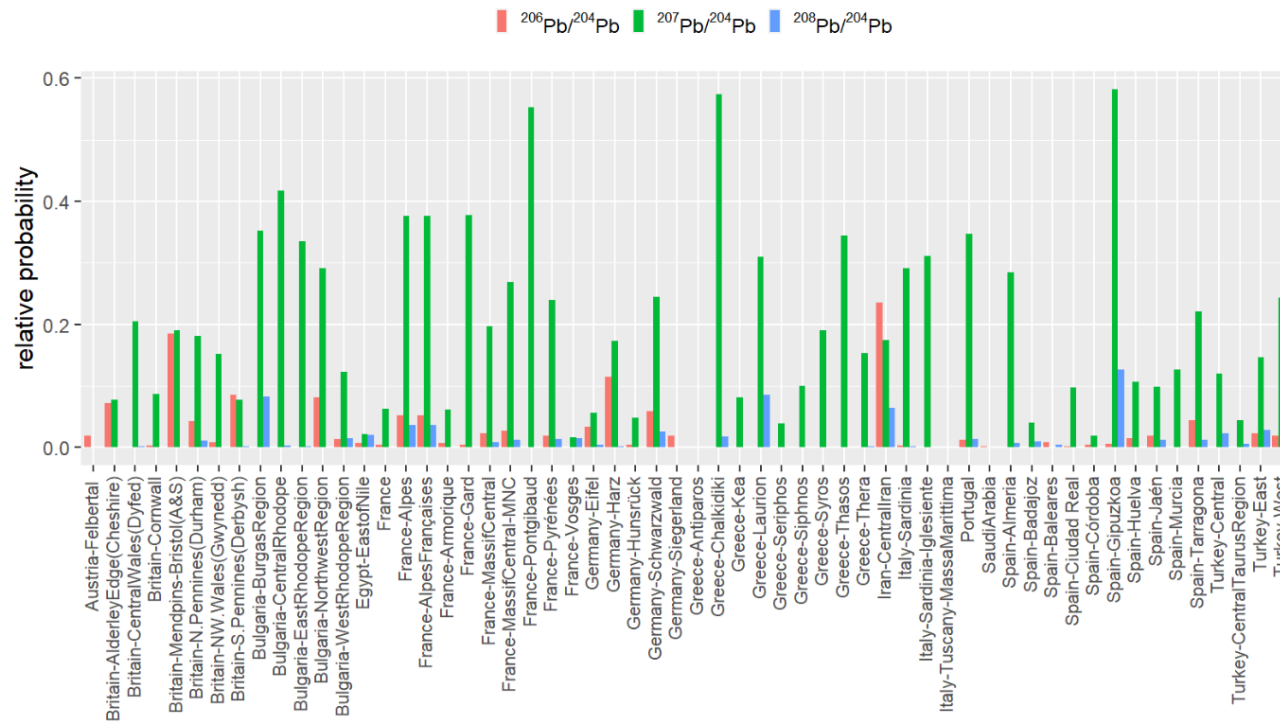

| Mining_Region                  | prob_206 | prob_207 | prob_208 | min>5%? | min |
|--------------------------------|----------|----------|----------|---------|-----|
| Austria-Felbertal              | 2%       | 0%       | 0%       | 0       | 0%  |
| Britain-AlderleyEdge(Cheshire) | 7%       | 8%       | 0%       | 0       | 0%  |
| Britain-CentralWales(Dyfed)    | 0%       | 20%      | 0%       | 0       | 0%  |
| Britain-Cornwall               | 0%       | 9%       | 0%       | 0       | 0%  |
| Britain-Mendpins-Bristol(A&S)  | 18%      | 19%      | 0%       | 0       | 0%  |
| Britain-N.Pennines(Durham)     | 4%       | 18%      | 1%       | 0       | 1%  |
| Britain-NW.Wales(Gwynedd)      | 1%       | 15%      | 0%       | 0       | 0%  |
| Britain-S.Pennines(Derbysh)    | 9%       | 8%       | 0%       | 0       | 0%  |
| Bulgaria-BurgasRegion          | 0%       | 35%      | 8%       | 0       | 0%  |
| Bulgaria-CentralRhodope        | 0%       | 42%      | 0%       | 0       | 0%  |
| Bulgaria-EastRhodopeRegion     | 0%       | 34%      | 0%       | 0       | 0%  |
| Bulgaria-NorthwestRegion       | 8%       | 29%      | 0%       | 0       | 0%  |
| Bulgaria-WestRhodopeRegion     | 1%       | 12%      | 1%       | 0       | 1%  |
| Egypt-EastofNile               | 1%       | 2%       | 2%       | 0       | 1%  |
| France                         | 0%       | 6%       | 0%       | 0       | 0%  |
| France-Alpes                   | 5%       | 38%      | 4%       | 0       | 4%  |
| France-AlpesFrançaises         | 5%       | 38%      | 4%       | 0       | 4%  |
| France-Armorique               | 1%       | 6%       | 0%       | 0       | 0%  |
| France-Gard                    | 0%       | 38%      | 0%       | 0       | 0%  |
| France-MassifCentral           | 2%       | 20%      | 1%       | 0       | 1%  |
| France-MassifCentral-MNC       | 3%       | 27%      | 1%       | 0       | 1%  |
| France-Pontgibaud              | 0%       | 55%      | 0%       | 0       | 0%  |
| France-Pyrénées                | 2%       | 24%      | 1%       | 0       | 1%  |
| France-Vosges                  | 0%       | 2%       | 1%       | 0       | 0%  |
| Germany-Eifel                  | 3%       | 6%       | 0%       | 0       | 0%  |
| Germany-Harz                   | 11%      | 17%      | 0%       | 0       | 0%  |
| Germany-Hunsrück               | 0%       | 5%       | 0%       | 0       | 0%  |
| Germany-Schwarzwald            | 6%       | 24%      | 2%       | 0       | 2%  |
| Germany-Siegerland             | 2%       | 0%       | 0%       | 0       | 0%  |
| Greece-Antiparos               | 0%       | 0%       | 0%       | 0       | 0%  |
| Greece-Chalkidiki              | 0%       | 57%      | 2%       | 0       | 0%  |
| Greece-Kea                     | 0%       | 8%       | 0%       | 0       | 0%  |
| Greece-Laurion                 | 0%       | 31%      | 9%       | 0       | 0%  |
| Greece-Seriphos                | 0%       | 4%       | 0%       | 0       | 0%  |
| Greece-Siphnos                 | 0%       | 10%      | 0%       | 0       | 0%  |
| Greece-Syros                   | 0%       | 19%      | 0%       | 0       | 0%  |
| Greece-Thasos                  | 0%       | 34%      | 0%       | 0       | 0%  |
| Greece-Thera                   | 0%       | 15%      | 0%       | 0       | 0%  |
| Iran-CentralIran               | 23%      | 17%      | 6%       | 1       | 6%  |
| Italy-Sardinia                 | 0%       | 29%      | 0%       | 0       | 0%  |
| Italy-Sardinia-Iglesiente      | 0%       | 31%      | 0%       | 0       | 0%  |
| Italy-Tuscany-MassaMarittima   | 0%       | 0%       | 0%       | 0       | 0%  |
| Portugal                       | 1%       | 35%      | 1%       | 0       | 1%  |
| SaudiArabia                    | 0%       | 0%       | 0%       | 0       | 0%  |
| Spain-Almeria                  | 0%       | 28%      | 1%       | 0       | 0%  |
| Spain-Badajoz                  | 0%       | 4%       | 1%       | 0       | 0%  |
| Spain-Baleares                 | 1%       | 0%       | 0%       | 0       | 0%  |
| Spain-Ciudad Real              | 0%       | 10%      | 0%       | 0       | 0%  |
| Spain-Córdoba                  | 0%       | 2%       | 0%       | 0       | 0%  |
| Spain-Gipuzkoa                 | 0%       | 58%      | 13%      | 0       | 0%  |
| Spain-Huelva                   | 1%       | 11%      | 0%       | 0       | 0%  |
| Spain-Jaén                     | 2%       | 10%      | 1%       | 0       | 1%  |
| Spain-Murcia                   | 0%       | 13%      | 0%       | 0       | 0%  |
| Spain-Tarragona                | 4%       | 22%      | 1%       | 0       | 1%  |
| Turkey-Central                 | 0%       | 12%      | 2%       | 0       | 0%  |
| Turkey-CentralTaurusRegion     | 0%       | 4%       | 1%       | 0       | 0%  |
| Turkey-East                    | 2%       | 15%      | 3%       | 0       | 2%  |
| Turkey-West                    | 2%       | 24%      | 2%       | 0       | 2%  |

b. Bulgaria – France

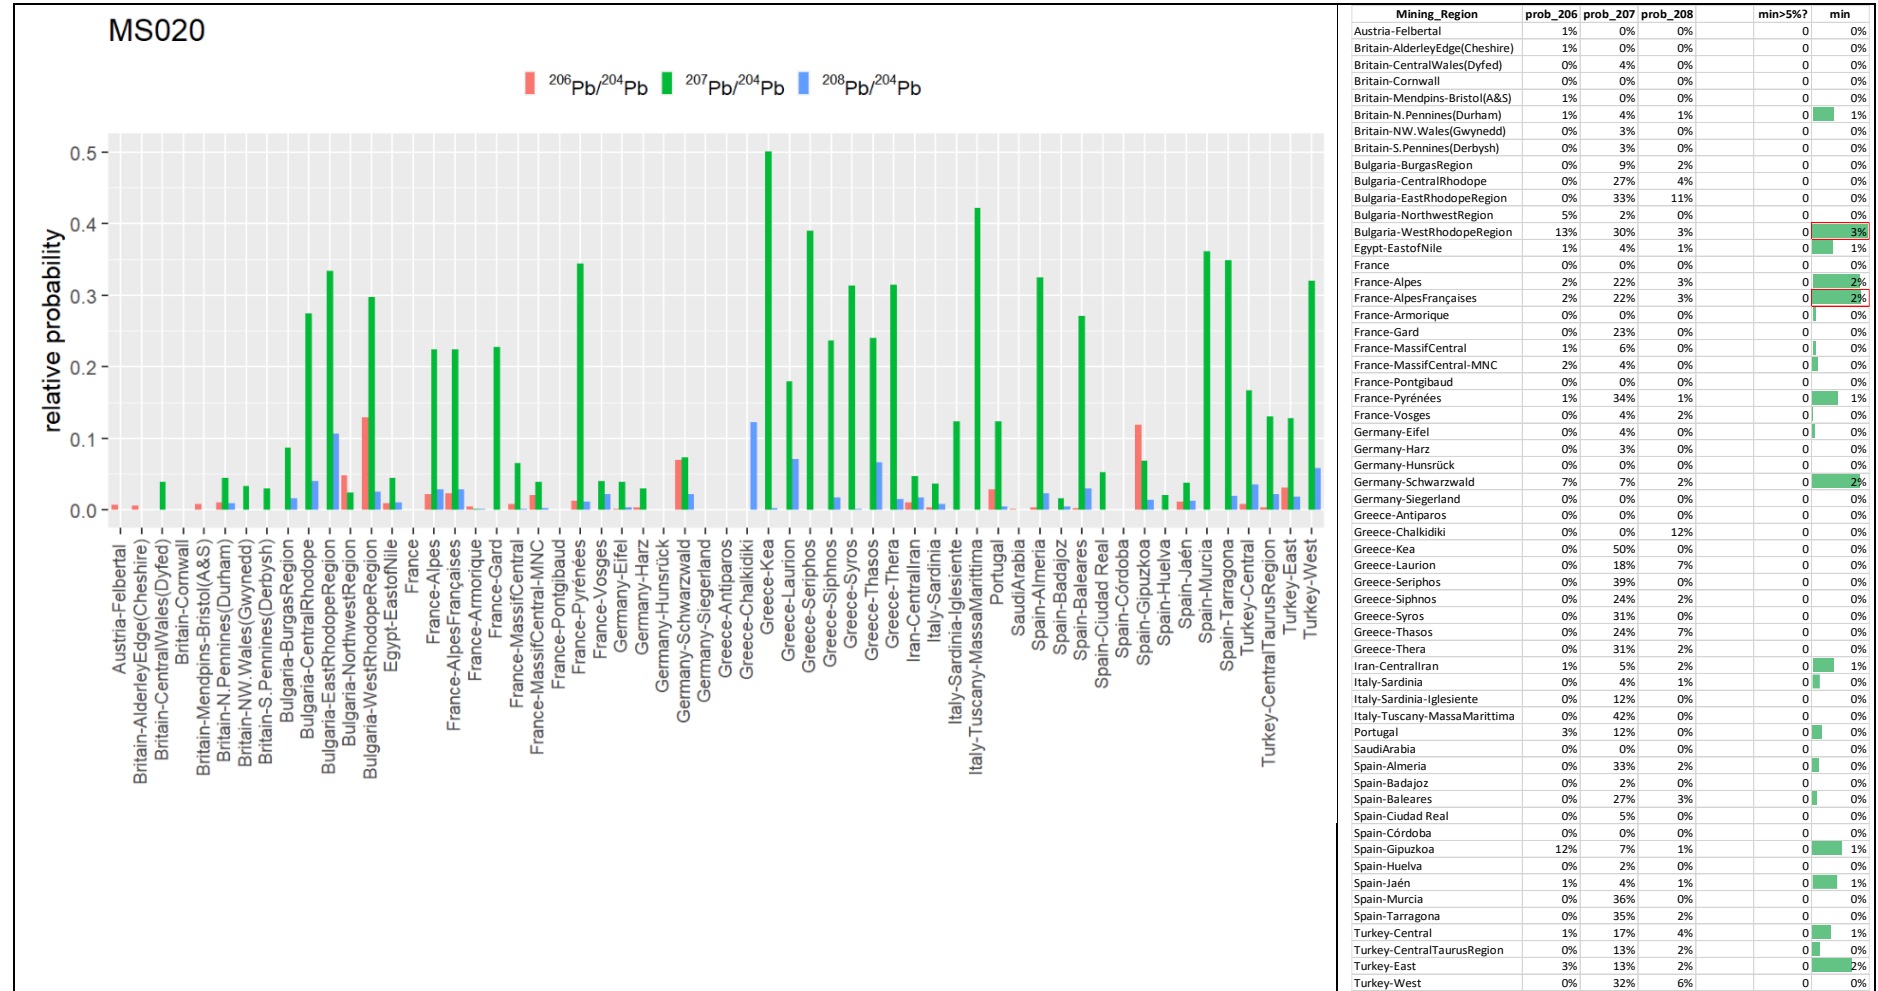

MS036

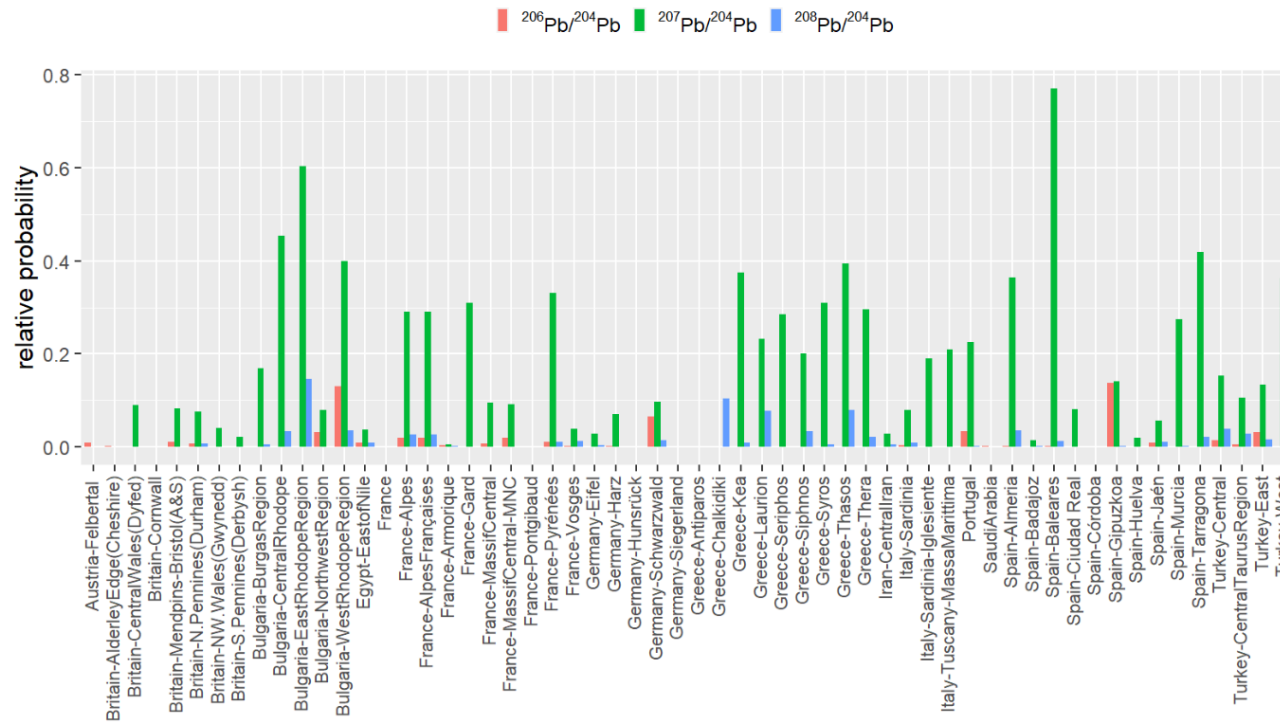

| Mining_Region                  | prob_206 | prob_207 | prob_208 | min>5%? | min |
|--------------------------------|----------|----------|----------|---------|-----|
| Austria-Felbertal              | 1%       | 0%       | 0%       | 0       | 0%  |
| Britain-AlderleyEdge(Cheshire) | 0%       | 0%       | 0%       | 0       | 0%  |
| Britain-CentralWales(Dyfed)    | 0%       | 9%       | 0%       | 0       | 0%  |
| Britain-Cornwall               | 0%       | 0%       | 0%       | 0       | 0%  |
| Britain-Mendips-Bristol(A&S)   | 1%       | 8%       | 0%       | 0       | 0%  |
| Britain-N.Pennines(Durham)     | 1%       | 8%       | 1%       | 0       | 1%  |
| Britain-NW.Wales(Gwynedd)      | 0%       | 4%       | 0%       | 0       | 0%  |
| Britain-S.Pennines(Derbysh)    | 0%       | 2%       | 0%       | 0       | 0%  |
| Bulgaria-BurgasRegion          | 0%       | 17%      | 1%       | 0       | 0%  |
| Bulgaria-CentralRhodope        | 0%       | 45%      | 3%       | 0       | 0%  |
| Bulgaria-EastRhodopeRegion     | 0%       | 60%      | 15%      | 0       | 0%  |
| Bulgaria-NorthwestRegion       | 3%       | 8%       | 0%       | 0       | 0%  |
| Bulgaria-WestRhodopeRegion     | 13%      | 40%      | 4%       | 0       | 4%  |
| Egypt-EastofNile               | 1%       | 4%       | 1%       | 0       | 1%  |
| France                         | 0%       | 0%       | 0%       | 0       | 0%  |
| France-Alpes                   | 2%       | 29%      | 3%       | 0       | 2%  |
| France-AlpesFrançaises         | 2%       | 29%      | 3%       | 0       | 2%  |
| France-Armorique               | 0%       | 1%       | 0%       | 0       | 0%  |
| France-Gard                    | 0%       | 31%      | 0%       | 0       | 0%  |
| France-MassifCentral           | 1%       | 10%      | 0%       | 0       | 0%  |
| France-MassifCentral-MNC       | 2%       | 9%       | 0%       | 0       | 0%  |
| France-Pontgibaud              | 0%       | 0%       | 0%       | 0       | 0%  |
| France-Pyrénées                | 1%       | 33%      | 1%       | 0       | 1%  |
| France-Vosges                  | 0%       | 4%       | 1%       | 0       | 0%  |
| Germany-Eifel                  | 0%       | 3%       | 0%       | 0       | 0%  |
| Germany-Harz                   | 0%       | 7%       | 0%       | 0       | 0%  |
| Germany-Hunsrück               | 0%       | 0%       | 0%       | 0       | 0%  |
| Germany-Schwarzwald            | 7%       | 10%      | 1%       | 0       | 1%  |
| Germany-Siegerland             | 0%       | 0%       | 0%       | 0       | 0%  |
| Greece-Antiparos               | 0%       | 0%       | 0%       | 0       | 0%  |
| Greece-Chalkidiki              | 0%       | 0%       | 10%      | 0       | 0%  |
| Greece-Kea                     | 0%       | 37%      | 1%       | 0       | 0%  |
| Greece-Laurion                 | 0%       | 23%      | 8%       | 0       | 0%  |
| Greece-Seriphos                | 0%       | 28%      | 0%       | 0       | 0%  |
| Greece-Siphnos                 | 0%       | 20%      | 3%       | 0       | 0%  |
| Greece-Syros                   | 0%       | 31%      | 1%       | 0       | 0%  |
| Greece-Thasos                  | 0%       | 39%      | 8%       | 0       | 0%  |
| Greece-Thera                   | 0%       | 30%      | 2%       | 0       | 0%  |
| Iran-Centrallran               | 0%       | 3%       | 0%       | 0       | 0%  |
| Italy-Sardinia                 | 0%       | 8%       | 1%       | 0       | 0%  |
| Italy-Sardinia-Iglesiente      | 0%       | 19%      | 0%       | 0       | 0%  |
| Italy-Tuscany-MassaMarittima   | 0%       | 21%      | 0%       | 0       | 0%  |
| Portugal                       | 3%       | 22%      | 0%       | 0       | 0%  |
| SaudiArabia                    | 0%       | 0%       | 0%       | 0       | 0%  |
| Spain-Almeria                  | 0%       | 36%      | 4%       | 0       | 0%  |
| Spain-Badajoz                  | 0%       | 1%       | 0%       | 0       | 0%  |
| Spain-Baleares                 | 0%       | 77%      | 1%       | 0       | 0%  |
| Spain-Ciudad Real              | 0%       | 8%       | 0%       | 0       | 0%  |
| Spain-Córdoba                  | 0%       | 0%       | 0%       | 0       | 0%  |
| Spain-Gipuzkoa                 | 14%      | 14%      | 0%       | 0       | 0%  |
| Spain-Huelva                   | 0%       | 2%       | 0%       | 0       | 0%  |
| Spain-Jaén                     | 1%       | 6%       | 1%       | 0       | 1%  |
| Spain-Murcia                   | 0%       | 28%      | 0%       | 0       | 0%  |
| Spain-Tarragona                | 0%       | 42%      | 2%       | 0       | 0%  |
| Turkey-Central                 | 1%       | 15%      | 4%       | 0       | 1%  |
| Turkey-CentralTaurusRegion     | 1%       | 11%      | 3%       | 0       | 1%  |
| Turkey-East                    | 3%       | 13%      | 2%       | 0       | 2%  |
| Turkey-West                    | 0%       | 36%      | 7%       | 0       | 0%  |

MS038

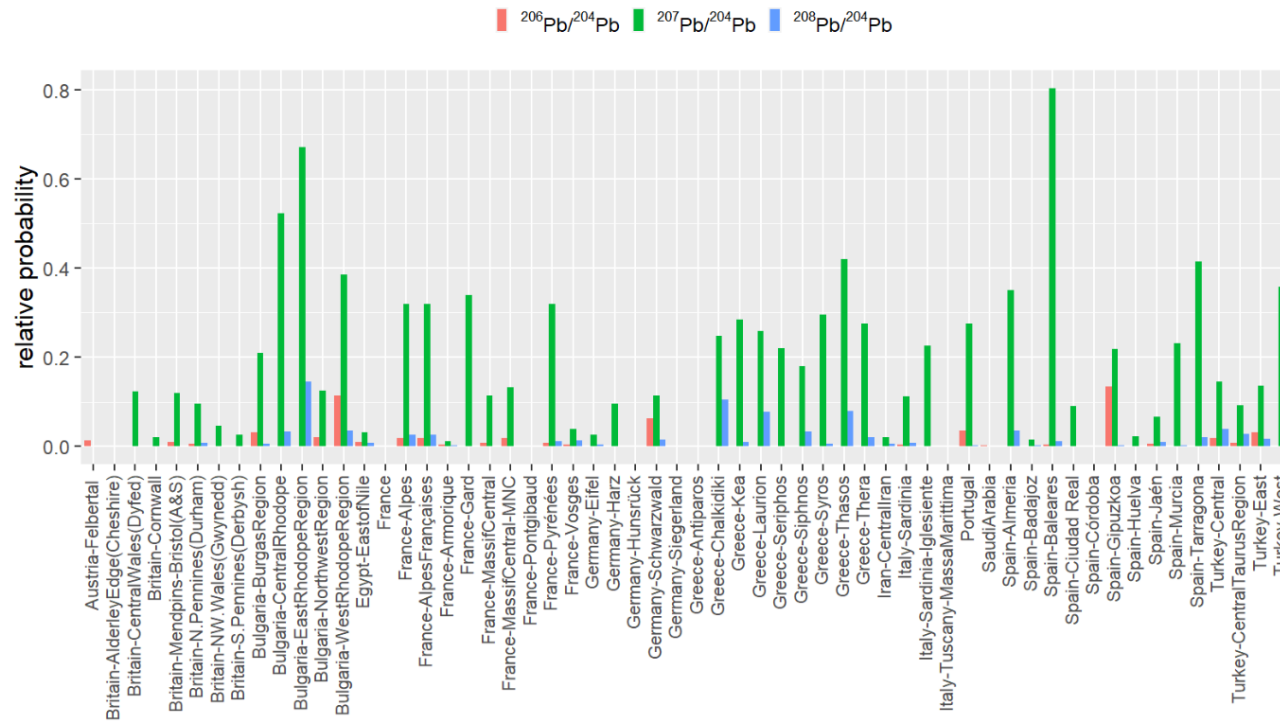

| Mining_Region                  | prob_206 | prob_207 | prob_208 | min>5%? | min |
|--------------------------------|----------|----------|----------|---------|-----|
| Austria-Felbertal              | 1%       | 0%       | 0%       | 0       | 0%  |
| Britain-AlderleyEdge(Cheshire) | 0%       | 0%       | 0%       | 0       | 0%  |
| Britain-CentralWales(Dyfed)    | 0%       | 12%      | 0%       | 0       | 0%  |
| Britain-Cornwall               | 0%       | 2%       | 0%       | 0       | 0%  |
| Britain-Mendips-Bristol(A&S)   | 1%       | 12%      | 0%       | 0       | 0%  |
| Britain-N. Pennines(Durham)    | 1%       | 10%      | 1%       | 0       | 1%  |
| Britain-NW. Wales(Gwynedd)     | 0%       | 5%       | 0%       | 0       | 0%  |
| Britain-S. Pennines(Derbysh)   | 0%       | 3%       | 0%       | 0       | 0%  |
| Bulgaria-BurgasRegion          | 3%       | 21%      | 1%       | 0       | 1%  |
| Bulgaria-CentralRhodope        | 0%       | 52%      | 3%       | 0       | 0%  |
| Bulgaria-EastRhodopeRegion     | 0%       | 67%      | 15%      | 0       | 0%  |
| Bulgaria-NorthwestRegion       | 2%       | 13%      | 0%       | 0       | 0%  |
| Bulgaria-WestRhodopeRegion     | 11%      | 39%      | 4%       | 0       | 4%  |
| Egypt-EastofNile               | 1%       | 3%       | 1%       | 0       | 1%  |
| France                         | 0%       | 0%       | 0%       | 0       | 0%  |
| France-Alpes                   | 2%       | 32%      | 3%       | 0       | 2%  |
| France-AlpesFrançaises         | 2%       | 32%      | 3%       | 0       | 2%  |
| France-Armorique               | 0%       | 1%       | 0%       | 0       | 0%  |
| France-Gard                    | 0%       | 34%      | 0%       | 0       | 0%  |
| France-MassifCentral           | 1%       | 11%      | 0%       | 0       | 0%  |
| France-MassifCentral-MNC       | 2%       | 13%      | 0%       | 0       | 0%  |
| France-Pontgibaud              | 0%       | 0%       | 0%       | 0       | 0%  |
| France-Pyrénées                | 1%       | 32%      | 1%       | 0       | 1%  |
| France-Vosges                  | 0%       | 4%       | 1%       | 0       | 0%  |
| Germany-Eifel                  | 0%       | 3%       | 0%       | 0       | 0%  |
| Germany-Harz                   | 0%       | 10%      | 0%       | 0       | 0%  |
| Germany-Hunsrück               | 0%       | 0%       | 0%       | 0       | 0%  |
| Germany-Schwarzwald            | 6%       | 11%      | 1%       | 0       | 1%  |
| Germany-Siegerland             | 0%       | 0%       | 0%       | 0       | 0%  |
| Greece-Antiparos               | 0%       | 0%       | 0%       | 0       | 0%  |
| Greece-Chalkidiki              | 0%       | 25%      | 10%      | 0       | 0%  |
| Greece-Kea                     | 0%       | 28%      | 1%       | 0       | 0%  |
| Greece-Laurion                 | 0%       | 26%      | 8%       | 0       | 0%  |
| Greece-Seriphos                | 0%       | 22%      | 0%       | 0       | 0%  |
| Greece-Siphnos                 | 0%       | 18%      | 3%       | 0       | 0%  |
| Greece-Syros                   | 0%       | 30%      | 1%       | 0       | 0%  |
| Greece-Thasos                  | 0%       | 42%      | 8%       | 0       | 0%  |
| Greece-Thera                   | 0%       | 27%      | 2%       | 0       | 0%  |
| Iran-CentrallIran              | 0%       | 2%       | 0%       | 0       | 0%  |
| Italy-Sardinia-Iglesiente      | 0%       | 11%      | 1%       | 0       | 0%  |
| Italy-Sardinia-Iglesiente      | 0%       | 22%      | 0%       | 0       | 0%  |
| Italy-Tuscany-MassaMarittima   | 0%       | 0%       | 0%       | 0       | 0%  |
| Portugal                       | 4%       | 28%      | 0%       | 0       | 0%  |
| SaudiArabia                    | 0%       | 0%       | 0%       | 0       | 0%  |
| Spain-Almeria                  | 0%       | 35%      | 4%       | 0       | 0%  |
| Spain-Badajoz                  | 0%       | 1%       | 0%       | 0       | 0%  |
| Spain-Baleares                 | 0%       | 80%      | 1%       | 0       | 0%  |
| Spain-Ciudad Real              | 0%       | 9%       | 0%       | 0       | 0%  |
| Spain-Córdoba                  | 0%       | 0%       | 0%       | 0       | 0%  |
| Spain-Gipuzkoa                 | 13%      | 22%      | 0%       | 0       | 0%  |
| Spain-Huelva                   | 0%       | 2%       | 0%       | 0       | 0%  |
| Spain-Jaén                     | 1%       | 7%       | 1%       | 0       | 1%  |
| Spain-Murcia                   | 0%       | 23%      | 0%       | 0       | 0%  |
| Spain-Tarragona                | 0%       | 41%      | 2%       | 0       | 0%  |
| Turkey-Central                 | 2%       | 14%      | 4%       | 0       | 2%  |
| Turkey-CentralTaurusRegion     | 1%       | 9%       | 3%       | 0       | 1%  |
| Turkey-East                    | 3%       | 14%      | 2%       | 0       | 2%  |
| Turkey-West                    | 0%       | 36%      | 7%       | 0       | 0%  |

MS040

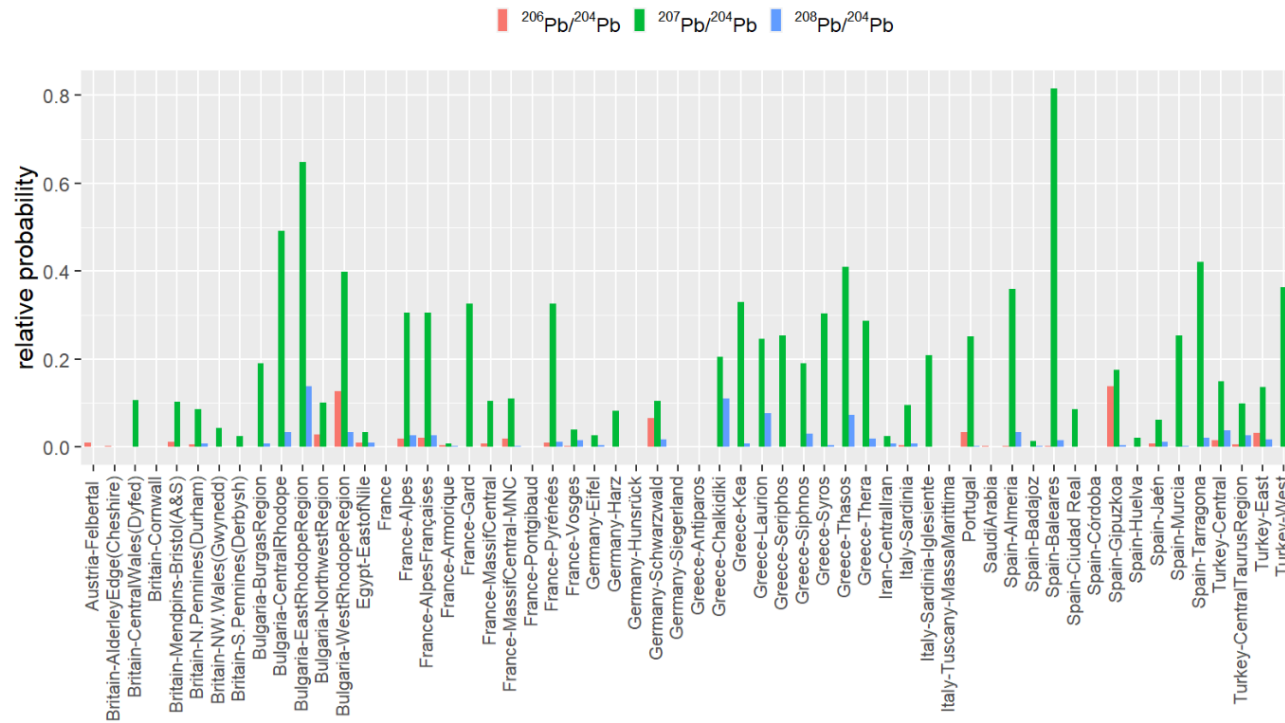

| Mining_Region                  | prob_206 | prob_207 | prob_208 | min>5%? | min |
|--------------------------------|----------|----------|----------|---------|-----|
| Austria-Felbertal              | 1%       | 0%       | 0%       | 0       | 0%  |
| Britain-AlderleyEdge(Cheshire) | 0%       | 0%       | 0%       | 0       | 0%  |
| Britain-CentralWales(Dyfed)    | 0%       | 11%      | 0%       | 0       | 0%  |
| Britain-Cornwall               | 0%       | 0%       | 0%       | 0       | 0%  |
| Britain-Mendips-Bristol(A&S)   | 1%       | 10%      | 0%       | 0       | 0%  |
| Britain-N.Pennines(Durham)     | 1%       | 9%       | 1%       | 0       | 1%  |
| Britain-NW.Wales(Gwynedd)      | 0%       | 4%       | 0%       | 0       | 0%  |
| Britain-S.Pennines(Derbysh)    | 0%       | 2%       | 0%       | 0       | 0%  |
| Bulgaria-BurgasRegion          | 0%       | 19%      | 1%       | 0       | 0%  |
| Bulgaria-CentralRhodope        | 0%       | 49%      | 3%       | 0       | 0%  |
| Bulgaria-EastRhodopeRegion     | 0%       | 65%      | 14%      | 0       | 0%  |
| Bulgaria-NorthwestRegion       | 3%       | 10%      | 0%       | 0       | 0%  |
| Bulgaria-WestRhodopeRegion     | 13%      | 40%      | 3%       | 0       | 3%  |
| Egypt-EastofNile               | 1%       | 3%       | 1%       | 0       | 1%  |
| France                         | 0%       | 0%       | 0%       | 0       | 0%  |
| France-Alpes                   | 2%       | 30%      | 3%       | 0       | 2%  |
| France-AlpesFrançaises         | 2%       | 30%      | 3%       | 0       | 2%  |
| France-Armorique               | 0%       | 1%       | 0%       | 0       | 0%  |
| France-Gard                    | 0%       | 33%      | 0%       | 0       | 0%  |
| France-MassifCentral           | 1%       | 10%      | 0%       | 0       | 0%  |
| France-MassifCentral-MNC       | 2%       | 11%      | 0%       | 0       | 0%  |
| France-Pontgibaud              | 0%       | 0%       | 0%       | 0       | 0%  |
| France-Pyrénées                | 1%       | 33%      | 1%       | 0       | 1%  |
| France-Vosges                  | 0%       | 4%       | 1%       | 0       | 0%  |
| Germany-Eifel                  | 0%       | 3%       | 0%       | 0       | 0%  |
| Germany-Harz                   | 0%       | 8%       | 0%       | 0       | 0%  |
| Germany-Hunsrück               | 0%       | 0%       | 0%       | 0       | 0%  |
| Germany-Schwarzwald            | 6%       | 10%      | 2%       | 0       | 2%  |
| Germany-Siegerland             | 0%       | 0%       | 0%       | 0       | 0%  |
| Greece-Antiparos               | 0%       | 0%       | 0%       | 0       | 0%  |
| Greece-Chalkidiki              | 0%       | 21%      | 11%      | 0       | 0%  |
| Greece-Kea                     | 0%       | 33%      | 1%       | 0       | 0%  |
| Greece-Laurion                 | 0%       | 25%      | 8%       | 0       | 0%  |
| Greece-Seriphos                | 0%       | 25%      | 0%       | 0       | 0%  |
| Greece-Siphnos                 | 0%       | 19%      | 3%       | 0       | 0%  |
| Greece-Syros                   | 0%       | 30%      | 0%       | 0       | 0%  |
| Greece-Thasos                  | 0%       | 41%      | 7%       | 0       | 0%  |
| Greece-Thera                   | 0%       | 29%      | 2%       | 0       | 0%  |
| Iran-Centrallran               | 0%       | 2%       | 1%       | 0       | 0%  |
| Italy-Sardinia                 | 0%       | 10%      | 1%       | 0       | 0%  |
| Italy-Sardinia-Iglesiente      | 0%       | 21%      | 0%       | 0       | 0%  |
| Italy-Tuscany-MassaMarittima   | 0%       | 0%       | 0%       | 0       | 0%  |
| Portugal                       | 3%       | 25%      | 0%       | 0       | 0%  |
| SaudiArabia                    | 0%       | 0%       | 0%       | 0       | 0%  |
| Spain-Almeria                  | 0%       | 36%      | 3%       | 0       | 0%  |
| Spain-Badajoz                  | 0%       | 1%       | 0%       | 0       | 0%  |
| Spain-Baleares                 | 0%       | 82%      | 1%       | 0       | 0%  |
| Spain-Ciudad Real              | 0%       | 9%       | 0%       | 0       | 0%  |
| Spain-Córdoba                  | 0%       | 0%       | 0%       | 0       | 0%  |
| Spain-Gipuzkoa                 | 14%      | 18%      | 0%       | 0       | 0%  |
| Spain-Huelva                   | 0%       | 2%       | 0%       | 0       | 0%  |
| Spain-Jaén                     | 1%       | 6%       | 1%       | 0       | 1%  |
| Spain-Murcia                   | 0%       | 25%      | 0%       | 0       | 0%  |
| Spain-Tarragona                | 0%       | 42%      | 2%       | 0       | 0%  |
| Turkey-Central                 | 1%       | 15%      | 4%       | 0       | 1%  |
| Turkey-CentralTaurusRegion     | 1%       | 10%      | 3%       | 0       | 1%  |
| Turkey-East                    | 3%       | 14%      | 2%       | 0       | 2%  |
| Turkey-West                    | 0%       | 36%      | 7%       | 0       | 0%  |



MS052

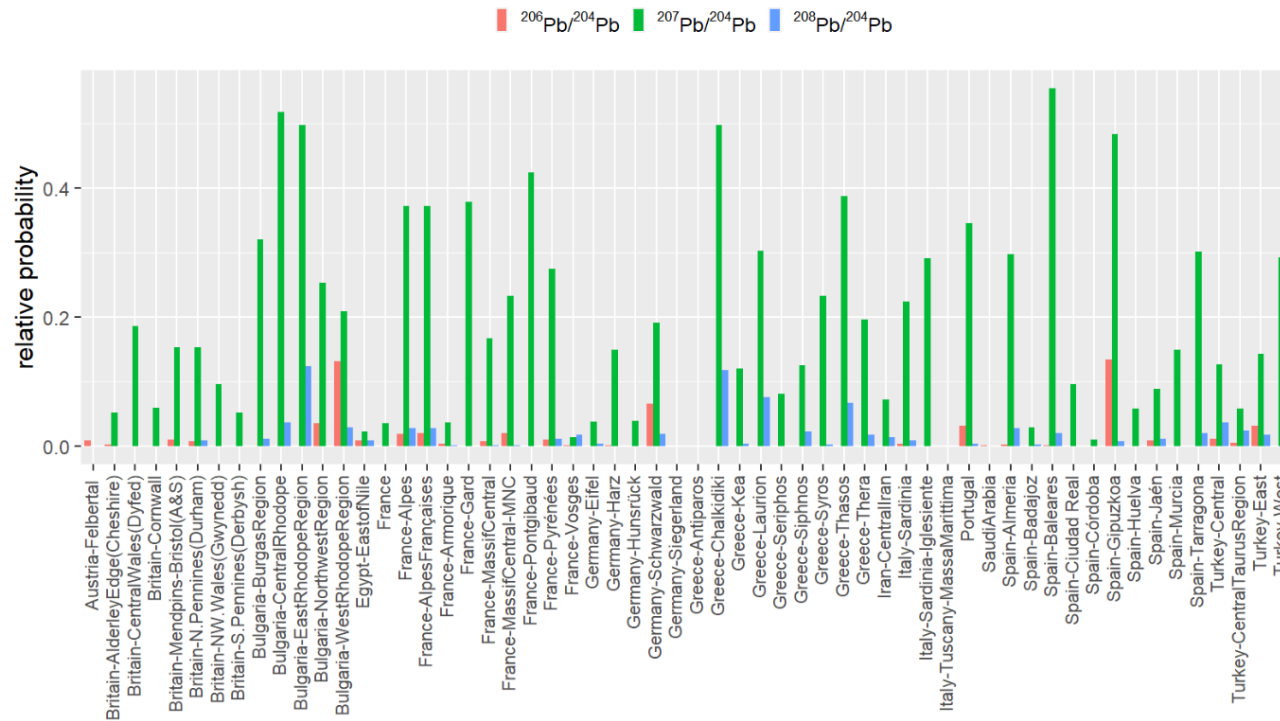

| Mining_Region                  | prob_206 | prob_207 | prob_208 | min>5%? | min |
|--------------------------------|----------|----------|----------|---------|-----|
| Austria-Felbertal              | 1%       | 0%       | 0%       | 0       | 0%  |
| Britain-AlderleyEdge(Cheshire) | 0%       | 5%       | 0%       | 0       | 0%  |
| Britain-CentralWales(Dyfed)    | 0%       | 19%      | 0%       | 0       | 0%  |
| Britain-Cornwall               | 0%       | 6%       | 0%       | 0       | 0%  |
| Britain-Mendips-Bristol(A&S)   | 1%       | 15%      | 0%       | 0       | 0%  |
| Britain-N. Pennines(Durham)    | 1%       | 15%      | 1%       | 0       | 1%  |
| Britain-NW. Wales(Gwynedd)     | 0%       | 10%      | 0%       | 0       | 0%  |
| Britain-S. Pennines(Derbysh)   | 0%       | 5%       | 0%       | 0       | 0%  |
| Bulgaria-BurgasRegion          | 0%       | 32%      | 1%       | 0       | 0%  |
| Bulgaria-CentralRhodope        | 0%       | 52%      | 4%       | 0       | 0%  |
| Bulgaria-EastRhodopeRegion     | 0%       | 50%      | 12%      | 0       | 0%  |
| Bulgaria-NorthwestRegion       | 4%       | 25%      | 0%       | 0       | 0%  |
| Bulgaria-WestRhodopeRegion     | 13%      | 21%      | 3%       | 0       | 3%  |
| Egypt-EastofNile               | 1%       | 2%       | 1%       | 0       | 1%  |
| France                         | 0%       | 4%       | 0%       | 0       | 0%  |
| France-Alpes                   | 2%       | 37%      | 3%       | 0       | 2%  |
| France-AlpesFrançaises         | 2%       | 37%      | 3%       | 0       | 2%  |
| France-Armorique               | 0%       | 4%       | 0%       | 0       | 0%  |
| France-Gard                    | 0%       | 38%      | 0%       | 0       | 0%  |
| France-MassifCentral           | 1%       | 17%      | 0%       | 0       | 0%  |
| France-MassifCentral-MNC       | 2%       | 23%      | 0%       | 0       | 0%  |
| France-Pontgibaud              | 0%       | 42%      | 0%       | 0       | 0%  |
| France-Pyrénées                | 1%       | 27%      | 1%       | 0       | 1%  |
| France-Vosges                  | 0%       | 1%       | 2%       | 0       | 0%  |
| Germany-Eifel                  | 0%       | 4%       | 0%       | 0       | 0%  |
| Germany-Harz                   | 0%       | 15%      | 0%       | 0       | 0%  |
| Germany-Hunsrück               | 0%       | 4%       | 0%       | 0       | 0%  |
| Germany-Schwarzwald            | 7%       | 19%      | 2%       | 0       | 2%  |
| Germany-Siegerland             | 0%       | 0%       | 0%       | 0       | 0%  |
| Greece-Antiparos               | 0%       | 0%       | 0%       | 0       | 0%  |
| Greece-Chalkidiki              | 0%       | 50%      | 12%      | 0       | 0%  |
| Greece-Kea                     | 0%       | 12%      | 0%       | 0       | 0%  |
| Greece-Laurion                 | 0%       | 30%      | 8%       | 0       | 0%  |
| Greece-Seriphos                | 0%       | 8%       | 0%       | 0       | 0%  |
| Greece-Siphnos                 | 0%       | 13%      | 2%       | 0       | 0%  |
| Greece-Syros                   | 0%       | 23%      | 0%       | 0       | 0%  |
| Greece-Thasos                  | 0%       | 39%      | 7%       | 0       | 0%  |
| Greece-Thera                   | 0%       | 20%      | 2%       | 0       | 0%  |
| Iran-Centrallran               | 0%       | 7%       | 1%       | 0       | 0%  |
| Italy-Sardinia-Iglesiente      | 0%       | 22%      | 1%       | 0       | 0%  |
| Italy-Sardinia-MassaMarittima  | 0%       | 29%      | 0%       | 0       | 0%  |
| Italy-Tuscany-MassaMarittima   | 0%       | 0%       | 0%       | 0       | 0%  |
| Portugal                       | 3%       | 35%      | 0%       | 0       | 0%  |
| SaudiArabia                    | 0%       | 0%       | 0%       | 0       | 0%  |
| Spain-Almeria                  | 0%       | 30%      | 3%       | 0       | 0%  |
| Spain-Badajoz                  | 0%       | 3%       | 0%       | 0       | 0%  |
| Spain-Baleares                 | 0%       | 55%      | 2%       | 0       | 0%  |
| Spain-Ciudad Real              | 0%       | 10%      | 0%       | 0       | 0%  |
| Spain-Córdoba                  | 0%       | 1%       | 0%       | 0       | 0%  |
| Spain-Gipuzkoa                 | 13%      | 48%      | 1%       | 0       | 1%  |
| Spain-Huelva                   | 0%       | 6%       | 0%       | 0       | 0%  |
| Spain-Jaén                     | 1%       | 9%       | 1%       | 0       | 1%  |
| Spain-Murcia                   | 0%       | 15%      | 0%       | 0       | 0%  |
| Spain-Tarragona                | 0%       | 30%      | 2%       | 0       | 0%  |
| Turkey-Central                 | 1%       | 13%      | 4%       | 0       | 1%  |
| Turkey-CentralTaurusRegion     | 1%       | 6%       | 2%       | 0       | 1%  |
| Turkey-East                    | 3%       | 14%      | 2%       | 0       | 2%  |
| Turkey-West                    | 0%       | 29%      | 6%       | 0       | 0%  |

c. Bulgaria – Turkey

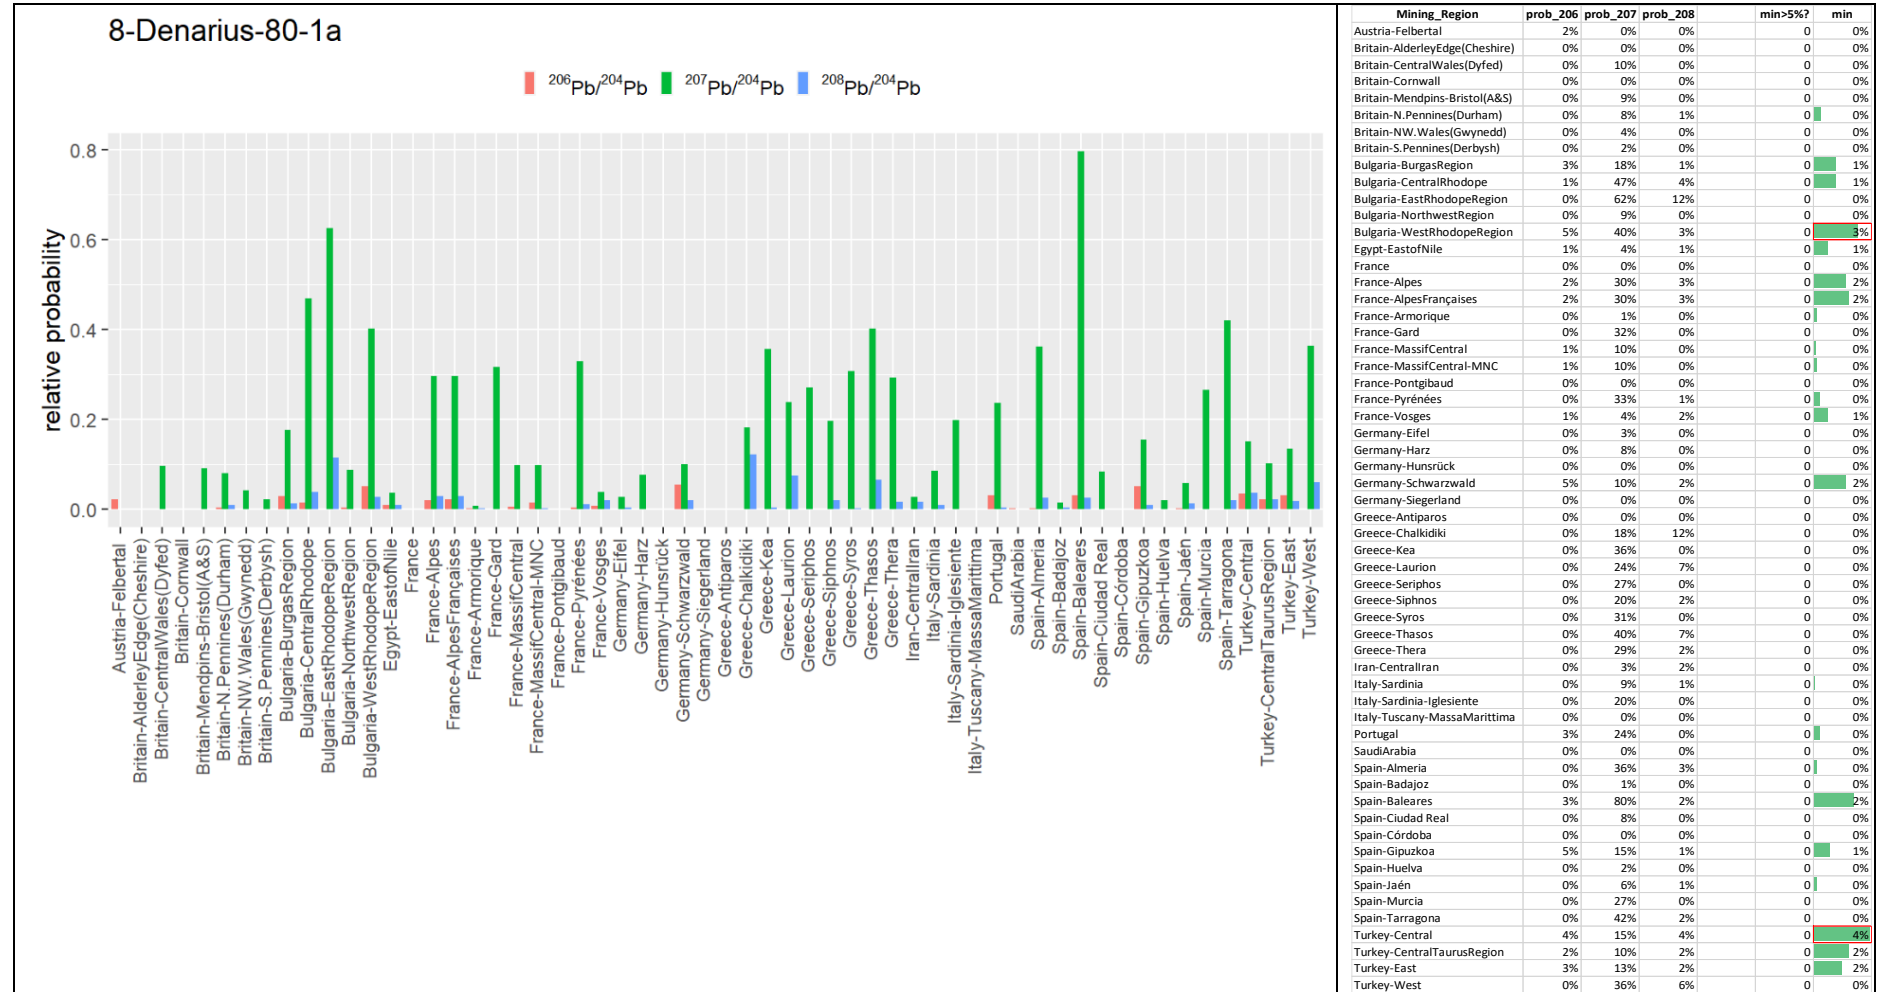

MS018

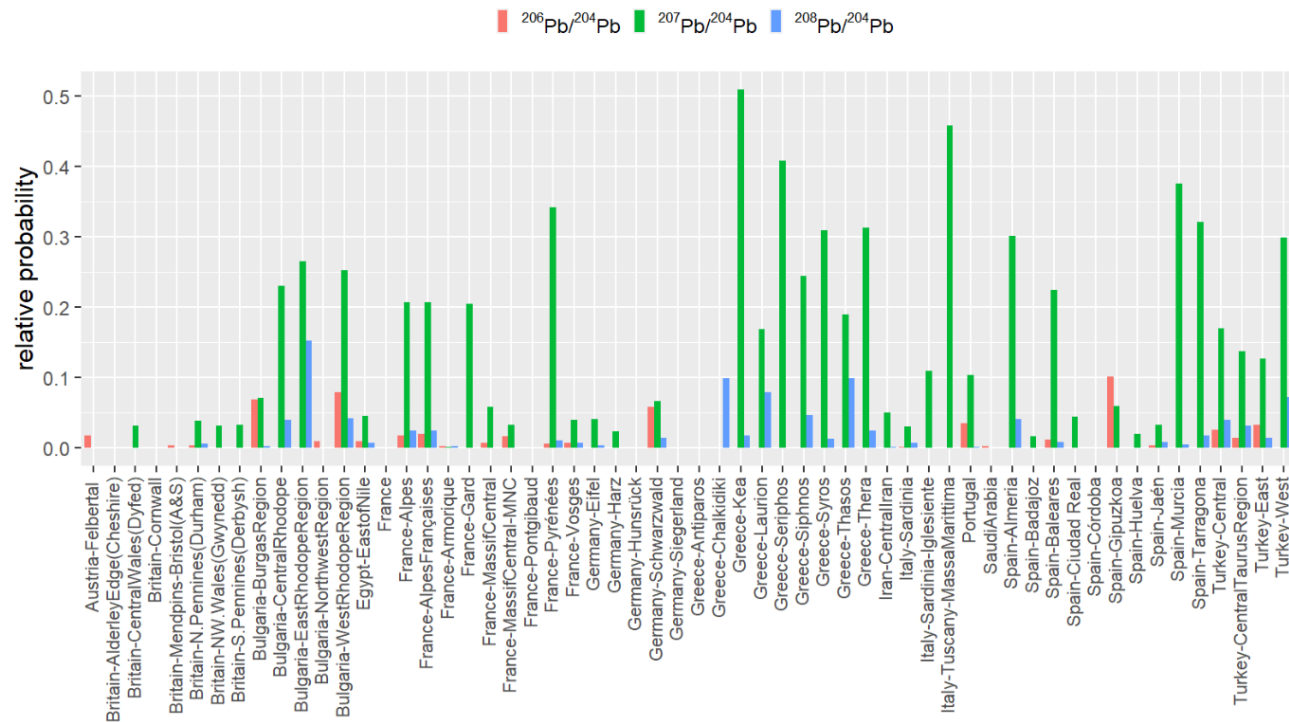

| Mining_Region                  | prob_206 | prob_207 | prob_208 | min>5%? | min |
|--------------------------------|----------|----------|----------|---------|-----|
| Austria-Felbertal              | 2%       | 0%       | 0%       | 0       | 0%  |
| Britain-AlderleyEdge(Cheshire) | 0%       | 0%       | 0%       | 0       | 0%  |
| Britain-CentralWales(Dyfed)    | 0%       | 3%       | 0%       | 0       | 0%  |
| Britain-Cornwall               | 0%       | 0%       | 0%       | 0       | 0%  |
| Britain-Mendips-Bristol(A&S)   | 0%       | 0%       | 0%       | 0       | 0%  |
| Britain-N.Pennines(Durham)     | 0%       | 4%       | 1%       | 0       | 0%  |
| Britain-NW.Wales(Gwynedd)      | 0%       | 3%       | 0%       | 0       | 0%  |
| Britain-S.Pennines(Derbys)     | 0%       | 3%       | 0%       | 0       | 0%  |
| Bulgaria-BurgasRegion          | 7%       | 7%       | 0%       | 0       | 0%  |
| Bulgaria-CentralRhodope        | 0%       | 23%      | 4%       | 0       | 0%  |
| Bulgaria-EastRhodopeRegion     | 0%       | 27%      | 15%      | 0       | 0%  |
| Bulgaria-NorthwestRegion       | 1%       | 0%       | 0%       | 0       | 0%  |
| Bulgaria-WestRhodopeRegion     | 8%       | 25%      | 4%       | 0       | 4%  |
| Egypt-EastofNile               | 1%       | 5%       | 1%       | 0       | 1%  |
| France                         | 0%       | 0%       | 0%       | 0       | 0%  |
| France-Alpes                   | 2%       | 21%      | 3%       | 0       | 2%  |
| France-AlpesFrançaises         | 2%       | 21%      | 3%       | 0       | 2%  |
| France-Armorique               | 0%       | 0%       | 0%       | 0       | 0%  |
| France-Gard                    | 0%       | 21%      | 0%       | 0       | 0%  |
| France-MassifCentral           | 1%       | 6%       | 0%       | 0       | 0%  |
| France-MassifCentral-MNC       | 2%       | 3%       | 0%       | 0       | 0%  |
| France-Pontgibaud              | 0%       | 0%       | 0%       | 0       | 0%  |
| France-Pyrénées                | 1%       | 34%      | 1%       | 0       | 1%  |
| France-Vosges                  | 1%       | 4%       | 1%       | 0       | 1%  |
| Germany-Eifel                  | 0%       | 4%       | 0%       | 0       | 0%  |
| Germany-Harz                   | 0%       | 2%       | 0%       | 0       | 0%  |
| Germany-Hunsrück               | 0%       | 0%       | 0%       | 0       | 0%  |
| Germany-Schwarzwald            | 6%       | 7%       | 1%       | 0       | 1%  |
| Germany-Siegerland             | 0%       | 0%       | 0%       | 0       | 0%  |
| Greece-Antiparos               | 0%       | 0%       | 0%       | 0       | 0%  |
| Greece-Chalkidiki              | 0%       | 0%       | 10%      | 0       | 0%  |
| Greece-Kea                     | 0%       | 51%      | 2%       | 0       | 0%  |
| Greece-Laurion                 | 0%       | 17%      | 8%       | 0       | 0%  |
| Greece-Seriphos                | 0%       | 41%      | 0%       | 0       | 0%  |
| Greece-Siphnos                 | 0%       | 24%      | 5%       | 0       | 0%  |
| Greece-Syros                   | 0%       | 31%      | 1%       | 0       | 0%  |
| Greece-Thasos                  | 0%       | 19%      | 10%      | 0       | 0%  |
| Greece-Thera                   | 0%       | 31%      | 2%       | 0       | 0%  |
| Iran-Centrallran               | 0%       | 5%       | 0%       | 0       | 0%  |
| Italy-Sardinia-Iglesiente      | 0%       | 3%       | 1%       | 0       | 0%  |
| Italy-Tuscany-MassaMarittima   | 0%       | 11%      | 0%       | 0       | 0%  |
| Portugal                       | 4%       | 10%      | 0%       | 0       | 0%  |
| SaudiArabia                    | 0%       | 0%       | 0%       | 0       | 0%  |
| Spain-Almeria                  | 0%       | 30%      | 4%       | 0       | 0%  |
| Spain-Badajoz                  | 0%       | 2%       | 0%       | 0       | 0%  |
| Spain-Baleares                 | 1%       | 22%      | 1%       | 0       | 1%  |
| Spain-Ciudad Real              | 0%       | 4%       | 0%       | 0       | 0%  |
| Spain-Córdoba                  | 0%       | 0%       | 0%       | 0       | 0%  |
| Spain-Gipuzkoa                 | 10%      | 6%       | 0%       | 0       | 0%  |
| Spain-Huelva                   | 0%       | 2%       | 0%       | 0       | 0%  |
| Spain-Jaén                     | 0%       | 3%       | 1%       | 0       | 0%  |
| Spain-Murcia                   | 0%       | 38%      | 0%       | 0       | 0%  |
| Spain-Tarragona                | 0%       | 32%      | 2%       | 0       | 0%  |
| Turkey-Central                 | 3%       | 17%      | 4%       | 0       | 3%  |
| Turkey-CentralTaurusRegion     | 1%       | 14%      | 3%       | 0       | 1%  |
| Turkey-East                    | 3%       | 13%      | 1%       | 0       | 1%  |
| Turkey-West                    | 0%       | 30%      | 7%       | 0       | 0%  |

MS021

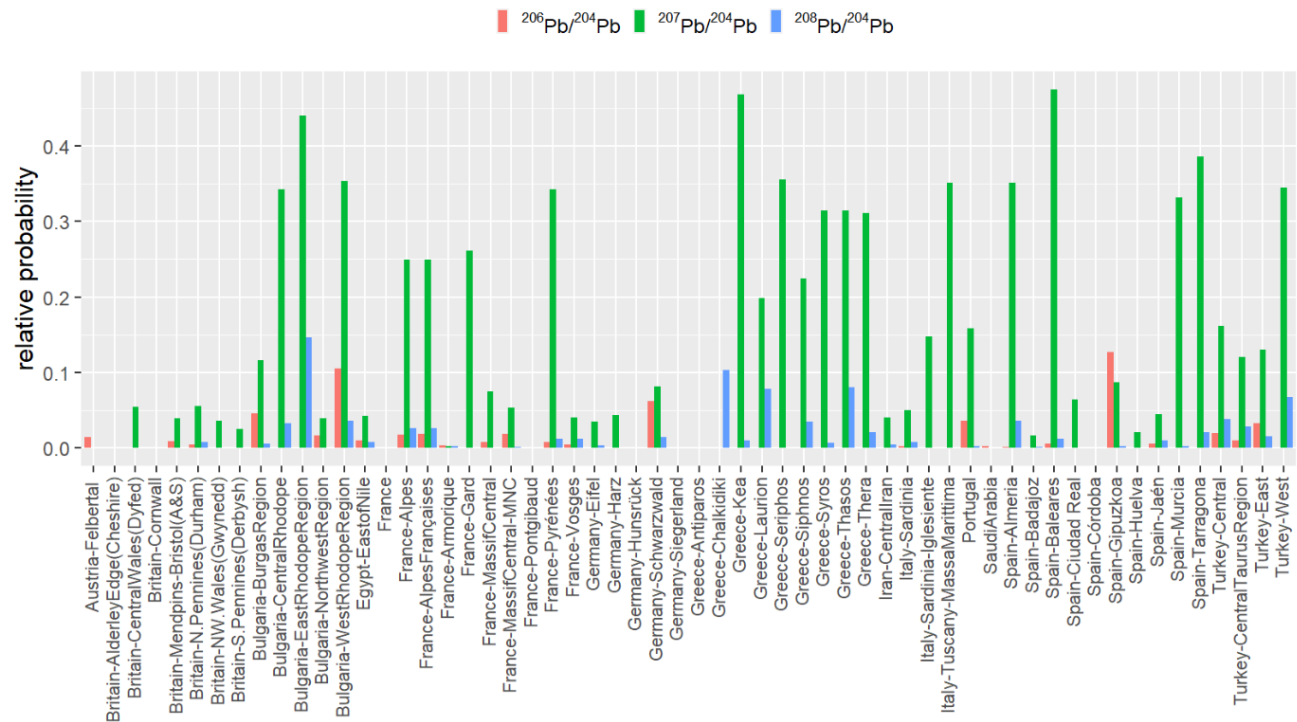

| Mining_Region                  | prob_206 | prob_207 | prob_208 | min>5%? | min |
|--------------------------------|----------|----------|----------|---------|-----|
| Austria-Felbertal              | 1%       | 0%       | 0%       | 0       | 0%  |
| Britain-AlderleyEdge(Cheshire) | 0%       | 0%       | 0%       | 0       | 0%  |
| Britain-CentralWales(Dyfed)    | 0%       | 5%       | 0%       | 0       | 0%  |
| Britain-Cornwall               | 0%       | 0%       | 0%       | 0       | 0%  |
| Britain-Mendips-Bristol(A&S)   | 1%       | 4%       | 0%       | 0       | 0%  |
| Britain-N. Pennines(Durham)    | 0%       | 6%       | 1%       | 0       | 0%  |
| Britain-NW.Wales(Gwynedd)      | 0%       | 4%       | 0%       | 0       | 0%  |
| Britain-S.Pennines(Derbysh)    | 0%       | 2%       | 0%       | 0       | 0%  |
| Bulgaria-BurgasRegion          | 5%       | 12%      | 1%       | 0       | 1%  |
| Bulgaria-CentralRhodope        | 0%       | 34%      | 3%       | 0       | 0%  |
| Bulgaria-EastRhodopeRegion     | 0%       | 44%      | 15%      | 0       | 0%  |
| Bulgaria-NorthwestRegion       | 2%       | 4%       | 0%       | 0       | 0%  |
| Bulgaria-WestRhodopeRegion     | 10%      | 35%      | 4%       | 0       | 4%  |
| Egypt-EastofNile               | 1%       | 4%       | 1%       | 0       | 1%  |
| France                         | 0%       | 0%       | 0%       | 0       | 0%  |
| France-Alpes                   | 2%       | 25%      | 3%       | 0       | 2%  |
| France-AlpesFrançaises         | 2%       | 25%      | 3%       | 0       | 2%  |
| France-Armorique               | 0%       | 0%       | 0%       | 0       | 0%  |
| France-Gard                    | 0%       | 26%      | 0%       | 0       | 0%  |
| France-MassifCentral           | 1%       | 8%       | 0%       | 0       | 0%  |
| France-MassifCentral-MNC       | 2%       | 5%       | 0%       | 0       | 0%  |
| France-Pontgibaud              | 0%       | 0%       | 0%       | 0       | 0%  |
| France-Pyrénées                | 1%       | 34%      | 1%       | 0       | 1%  |
| France-Vosges                  | 0%       | 4%       | 1%       | 0       | 0%  |
| Germany-Eifel                  | 0%       | 3%       | 0%       | 0       | 0%  |
| Germany-Harz                   | 0%       | 4%       | 0%       | 0       | 0%  |
| Germany-Hunsrück               | 0%       | 0%       | 0%       | 0       | 0%  |
| Germany-Schwarzwald            | 6%       | 8%       | 1%       | 0       | 1%  |
| Germany-Siegerland             | 0%       | 0%       | 0%       | 0       | 0%  |
| Greece-Antiparos               | 0%       | 0%       | 0%       | 0       | 0%  |
| Greece-Chalkidiki              | 0%       | 0%       | 10%      | 0       | 0%  |
| Greece-Kea                     | 0%       | 47%      | 1%       | 0       | 0%  |
| Greece-Launon                  | 0%       | 20%      | 8%       | 0       | 0%  |
| Greece-Seriphos                | 0%       | 36%      | 0%       | 0       | 0%  |
| Greece-Siphnos                 | 0%       | 22%      | 3%       | 0       | 0%  |
| Greece-Syros                   | 0%       | 31%      | 1%       | 0       | 0%  |
| Greece-Thasos                  | 0%       | 31%      | 8%       | 0       | 0%  |
| Greece-Thera                   | 0%       | 31%      | 2%       | 0       | 0%  |
| Iran-CentrallIran              | 0%       | 4%       | 0%       | 0       | 0%  |
| Italy-Sardinia                 | 0%       | 5%       | 1%       | 0       | 0%  |
| Italy-Sardinia-Iglesiente      | 0%       | 15%      | 0%       | 0       | 0%  |
| Italy-Tuscany-MassaMarittima   | 0%       | 35%      | 0%       | 0       | 0%  |
| Portugal                       | 4%       | 16%      | 0%       | 0       | 0%  |
| SaudiArabia                    | 0%       | 0%       | 0%       | 0       | 0%  |
| Spain-Almeria                  | 0%       | 35%      | 4%       | 0       | 0%  |
| Spain-Badajoz                  | 0%       | 2%       | 0%       | 0       | 0%  |
| Spain-Baleares                 | 1%       | 47%      | 1%       | 0       | 1%  |
| Spain-Ciudad Real              | 0%       | 6%       | 0%       | 0       | 0%  |
| Spain-Córdoba                  | 0%       | 0%       | 0%       | 0       | 0%  |
| Spain-Gipuzkoa                 | 13%      | 9%       | 0%       | 0       | 0%  |
| Spain-Huelva                   | 0%       | 2%       | 0%       | 0       | 0%  |
| Spain-Jaén                     | 1%       | 4%       | 1%       | 0       | 1%  |
| Spain-Murcia                   | 0%       | 33%      | 0%       | 0       | 0%  |
| Spain-Tarragona                | 0%       | 39%      | 2%       | 0       | 0%  |
| Turkey-Central                 | 2%       | 16%      | 4%       | 0       | 2%  |
| Turkey-CentralTaurusRegion     | 1%       | 12%      | 3%       | 0       | 1%  |
| Turkey-East                    | 3%       | 13%      | 2%       | 0       | 2%  |
| Turkey-West                    | 0%       | 35%      | 7%       | 0       | 0%  |

MS023

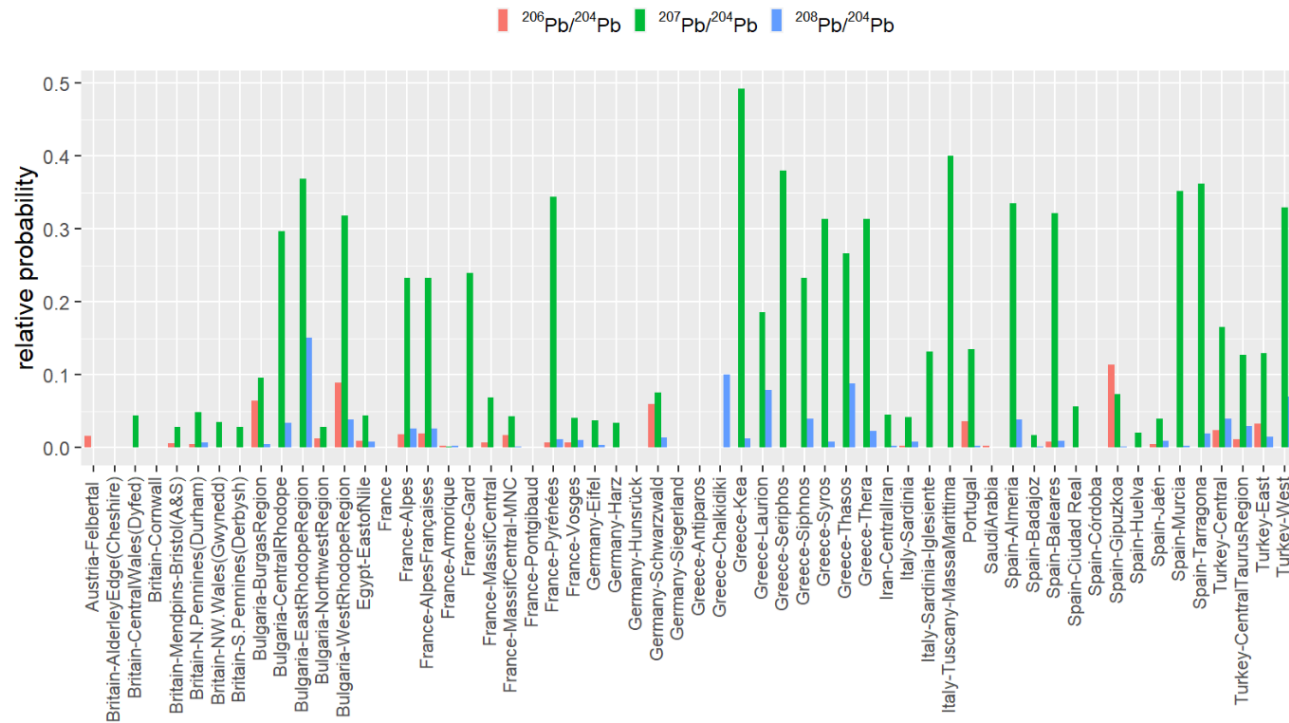

| Mining_Region                  | prob_206 | prob_207 | prob_208 | min>5%? | min |
|--------------------------------|----------|----------|----------|---------|-----|
| Austria-Felbertal              | 2%       | 0%       | 0%       | 0       | 0%  |
| Britain-AlderleyEdge(Cheshire) | 0%       | 0%       | 0%       | 0       | 0%  |
| Britain-CentralWales(Dyfed)    | 0%       | 4%       | 0%       | 0       | 0%  |
| Britain-Cornwall               | 0%       | 0%       | 0%       | 0       | 0%  |
| Britain-Mendips-Bristol(A&S)   | 1%       | 3%       | 0%       | 0       | 0%  |
| Britain-N. Pennines(Durham)    | 0%       | 5%       | 1%       | 0       | 0%  |
| Britain-NW. Wales(Gwynedd)     | 0%       | 3%       | 0%       | 0       | 0%  |
| Britain-S. Pennines(Derbysh)   | 0%       | 3%       | 0%       | 0       | 0%  |
| Bulgaria-BurgasRegion          | 6%       | 10%      | 0%       | 0       | 0%  |
| Bulgaria-CentralRhodope        | 0%       | 30%      | 3%       | 0       | 0%  |
| Bulgaria-EastRhodopeRegion     | 0%       | 37%      | 15%      | 0       | 0%  |
| Bulgaria-NorthwestRegion       | 1%       | 3%       | 0%       | 0       | 0%  |
| Bulgaria-WestRhodopeRegion     | 9%       | 32%      | 4%       | 0       | 4%  |
| Egypt-EastofNile               | 1%       | 4%       | 1%       | 0       | 1%  |
| France                         | 0%       | 0%       | 0%       | 0       | 0%  |
| France-Alpes                   | 2%       | 23%      | 3%       | 0       | 2%  |
| France-AlpesFrançaises         | 2%       | 23%      | 3%       | 0       | 2%  |
| France-Armorique               | 0%       | 0%       | 0%       | 0       | 0%  |
| France-Gard                    | 0%       | 24%      | 0%       | 0       | 0%  |
| France-MassifCentral           | 1%       | 7%       | 0%       | 0       | 0%  |
| France-MassifCentral-MNC       | 2%       | 4%       | 0%       | 0       | 0%  |
| France-Pontgibaud              | 0%       | 0%       | 0%       | 0       | 0%  |
| France-Pyrénées                | 1%       | 34%      | 1%       | 0       | 1%  |
| France-Vosges                  | 1%       | 4%       | 1%       | 0       | 1%  |
| Germany-Eifel                  | 0%       | 4%       | 0%       | 0       | 0%  |
| Germany-Harz                   | 0%       | 3%       | 0%       | 0       | 0%  |
| Germany-Hunsrück               | 0%       | 0%       | 0%       | 0       | 0%  |
| Germany-Schwarzwald            | 6%       | 8%       | 1%       | 0       | 1%  |
| Germany-Siegerland             | 0%       | 0%       | 0%       | 0       | 0%  |
| Greece-Antiparos               | 0%       | 0%       | 0%       | 0       | 0%  |
| Greece-Chalkidiki              | 0%       | 0%       | 10%      | 0       | 0%  |
| Greece-Kea                     | 0%       | 49%      | 1%       | 0       | 0%  |
| Greece-Laurion                 | 0%       | 19%      | 8%       | 0       | 0%  |
| Greece-Seriphos                | 0%       | 38%      | 0%       | 0       | 0%  |
| Greece-Siphnos                 | 0%       | 23%      | 4%       | 0       | 0%  |
| Greece-Syros                   | 0%       | 31%      | 1%       | 0       | 0%  |
| Greece-Thasos                  | 0%       | 27%      | 9%       | 0       | 0%  |
| Greece-Thera                   | 0%       | 31%      | 2%       | 0       | 0%  |
| Iran-CentrallIran              | 0%       | 4%       | 0%       | 0       | 0%  |
| Italy-Sardinia                 | 0%       | 4%       | 1%       | 0       | 0%  |
| Italy-Sardinia-Iglesiente      | 0%       | 13%      | 0%       | 0       | 0%  |
| Italy-Tuscany-MassaMarittima   | 0%       | 40%      | 0%       | 0       | 0%  |
| Portugal                       | 4%       | 13%      | 0%       | 0       | 0%  |
| SaudiArabia                    | 0%       | 0%       | 0%       | 0       | 0%  |
| Spain-Almeria                  | 0%       | 34%      | 4%       | 0       | 0%  |
| Spain-Badajoz                  | 0%       | 2%       | 0%       | 0       | 0%  |
| Spain-Baleares                 | 1%       | 32%      | 1%       | 0       | 1%  |
| Spain-Ciudad Real              | 0%       | 6%       | 0%       | 0       | 0%  |
| Spain-Córdoba                  | 0%       | 0%       | 0%       | 0       | 0%  |
| Spain-Gipuzkoa                 | 11%      | 7%       | 0%       | 0       | 0%  |
| Spain-Huelva                   | 0%       | 2%       | 0%       | 0       | 0%  |
| Spain-Jaén                     | 0%       | 4%       | 1%       | 0       | 0%  |
| Spain-Murcia                   | 0%       | 35%      | 0%       | 0       | 0%  |
| Spain-Tarragona                | 0%       | 36%      | 2%       | 0       | 0%  |
| Turkey-Central                 | 2%       | 17%      | 4%       | 0       | 2%  |
| Turkey-CentralTaurusRegion     | 1%       | 13%      | 3%       | 0       | 1%  |
| Turkey-East                    | 3%       | 13%      | 2%       | 0       | 2%  |
| Turkey-West                    | 0%       | 33%      | 7%       | 0       | 0%  |

MS028

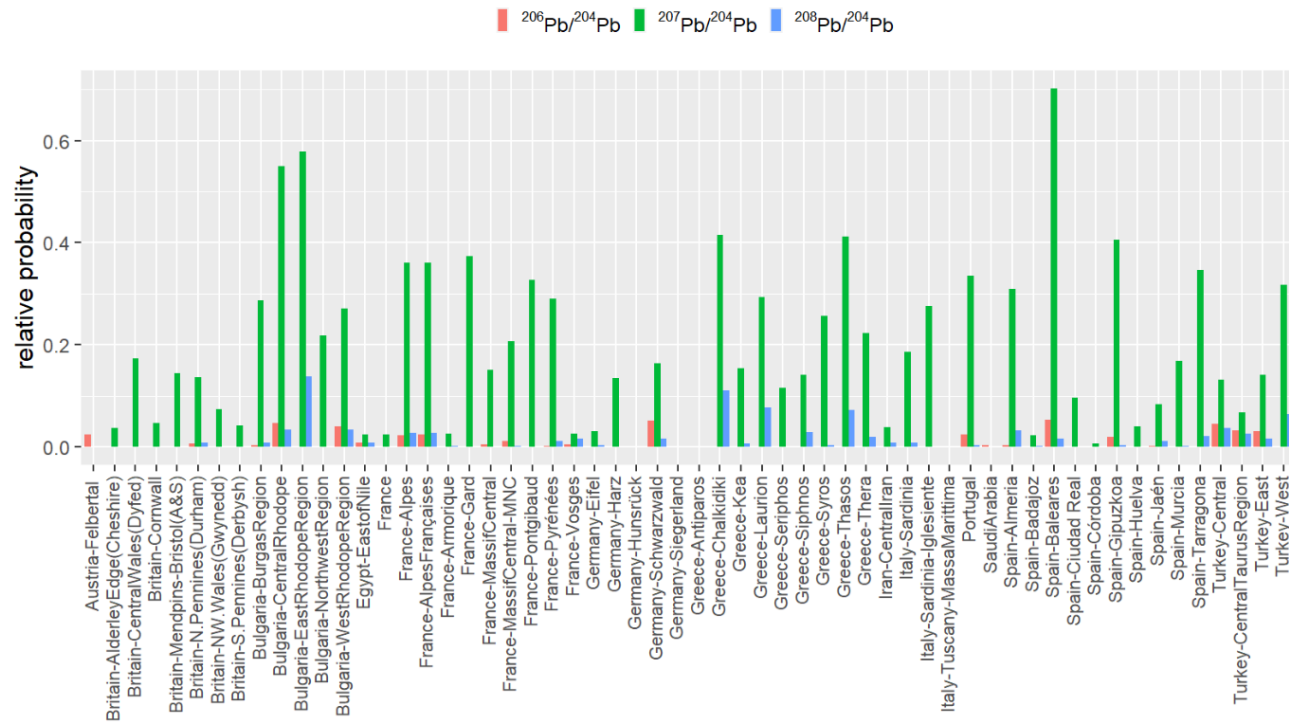

| Mining_Region                  | prob_206 | prob_207 | prob_208 | min>5%? | min |
|--------------------------------|----------|----------|----------|---------|-----|
| Austria-Felbertal              | 2%       | 0%       | 0%       | 0       | 0%  |
| Britain-AlderleyEdge(Cheshire) | 0%       | 4%       | 0%       | 0       | 0%  |
| Britain-CentralWales(Dyfed)    | 0%       | 17%      | 0%       | 0       | 0%  |
| Britain-Cornwall               | 0%       | 5%       | 0%       | 0       | 0%  |
| Britain-Mendips-Bristol(A&S)   | 0%       | 14%      | 0%       | 0       | 0%  |
| Britain-N. Pennines(Durham)    | 1%       | 14%      | 1%       | 0       | 1%  |
| Britain-NW. Wales(Gwynedd)     | 0%       | 7%       | 0%       | 0       | 0%  |
| Britain-S. Pennines(Derbysh)   | 0%       | 4%       | 0%       | 0       | 0%  |
| Bulgaria-BurgasRegion          | 0%       | 29%      | 1%       | 0       | 0%  |
| Bulgaria-CentralRhodope        | 5%       | 55%      | 3%       | 0       | 3%  |
| Bulgaria-EastRhodopeRegion     | 0%       | 58%      | 14%      | 0       | 0%  |
| Bulgaria-NorthwestRegion       | 0%       | 22%      | 0%       | 0       | 0%  |
| Bulgaria-WestRhodopeRegion     | 4%       | 27%      | 3%       | 0       | 3%  |
| Egypt-EastofNile               | 1%       | 2%       | 1%       | 0       | 1%  |
| France                         | 0%       | 2%       | 0%       | 0       | 0%  |
| France-Alpes                   | 2%       | 36%      | 3%       | 0       | 2%  |
| France-AlpesFrançaises         | 2%       | 36%      | 3%       | 0       | 2%  |
| France-Armorique               | 0%       | 3%       | 0%       | 0       | 0%  |
| France-Gard                    | 0%       | 37%      | 0%       | 0       | 0%  |
| France-MassifCentral           | 0%       | 15%      | 0%       | 0       | 0%  |
| France-MassifCentral-MNC       | 1%       | 21%      | 0%       | 0       | 0%  |
| France-Pontgibaud              | 0%       | 33%      | 0%       | 0       | 0%  |
| France-Pyrénées                | 0%       | 29%      | 1%       | 0       | 0%  |
| France-Vosges                  | 0%       | 3%       | 2%       | 0       | 0%  |
| Germany-Eifel                  | 0%       | 3%       | 0%       | 0       | 0%  |
| Germany-Harz                   | 0%       | 13%      | 0%       | 0       | 0%  |
| Germany-Hunsrück               | 0%       | 0%       | 0%       | 0       | 0%  |
| Germany-Schwarzwald            | 5%       | 16%      | 2%       | 0       | 2%  |
| Germany-Siegerland             | 0%       | 0%       | 0%       | 0       | 0%  |
| Greece-Antiparos               | 0%       | 0%       | 0%       | 0       | 0%  |
| Greece-Chalkidiki              | 0%       | 41%      | 11%      | 0       | 0%  |
| Greece-Kea                     | 0%       | 15%      | 1%       | 0       | 0%  |
| Greece-Laurion                 | 0%       | 29%      | 8%       | 0       | 0%  |
| Greece-Seriphos                | 0%       | 12%      | 0%       | 0       | 0%  |
| Greece-Siphnos                 | 0%       | 14%      | 3%       | 0       | 0%  |
| Greece-Syros                   | 0%       | 26%      | 0%       | 0       | 0%  |
| Greece-Thasos                  | 0%       | 41%      | 7%       | 0       | 0%  |
| Greece-Thera                   | 0%       | 22%      | 2%       | 0       | 0%  |
| Iran-CentrallIran              | 0%       | 4%       | 1%       | 0       | 0%  |
| Italy-Sardinia-Iglesiente      | 0%       | 19%      | 1%       | 0       | 0%  |
| Italy-Sardinia-Iglesiente      | 0%       | 28%      | 0%       | 0       | 0%  |
| Italy-Tuscany-MassaMarittima   | 0%       | 0%       | 0%       | 0       | 0%  |
| Portugal                       | 2%       | 34%      | 0%       | 0       | 0%  |
| SaudiArabia                    | 0%       | 0%       | 0%       | 0       | 0%  |
| Spain-Almeria                  | 0%       | 31%      | 3%       | 0       | 0%  |
| Spain-Badajoz                  | 0%       | 2%       | 0%       | 0       | 0%  |
| Spain-Baleares                 | 5%       | 70%      | 2%       | 0       | 2%  |
| Spain-Ciudad Real              | 0%       | 10%      | 0%       | 0       | 0%  |
| Spain-Córdoba                  | 0%       | 1%       | 0%       | 0       | 0%  |
| Spain-Gipuzkoa                 | 2%       | 41%      | 0%       | 0       | 0%  |
| Spain-Huelva                   | 0%       | 4%       | 0%       | 0       | 0%  |
| Spain-Jaén                     | 0%       | 8%       | 1%       | 0       | 0%  |
| Spain-Murcia                   | 0%       | 17%      | 0%       | 0       | 0%  |
| Spain-Tarragona                | 0%       | 35%      | 2%       | 0       | 0%  |
| Turkey-Central                 | 5%       | 13%      | 4%       | 0       | 4%  |
| Turkey-CentralTaurusRegion     | 3%       | 7%       | 3%       | 0       | 3%  |
| Turkey-East                    | 3%       | 14%      | 2%       | 0       | 2%  |
| Turkey-West                    | 0%       | 32%      | 6%       | 0       | 0%  |



MS030

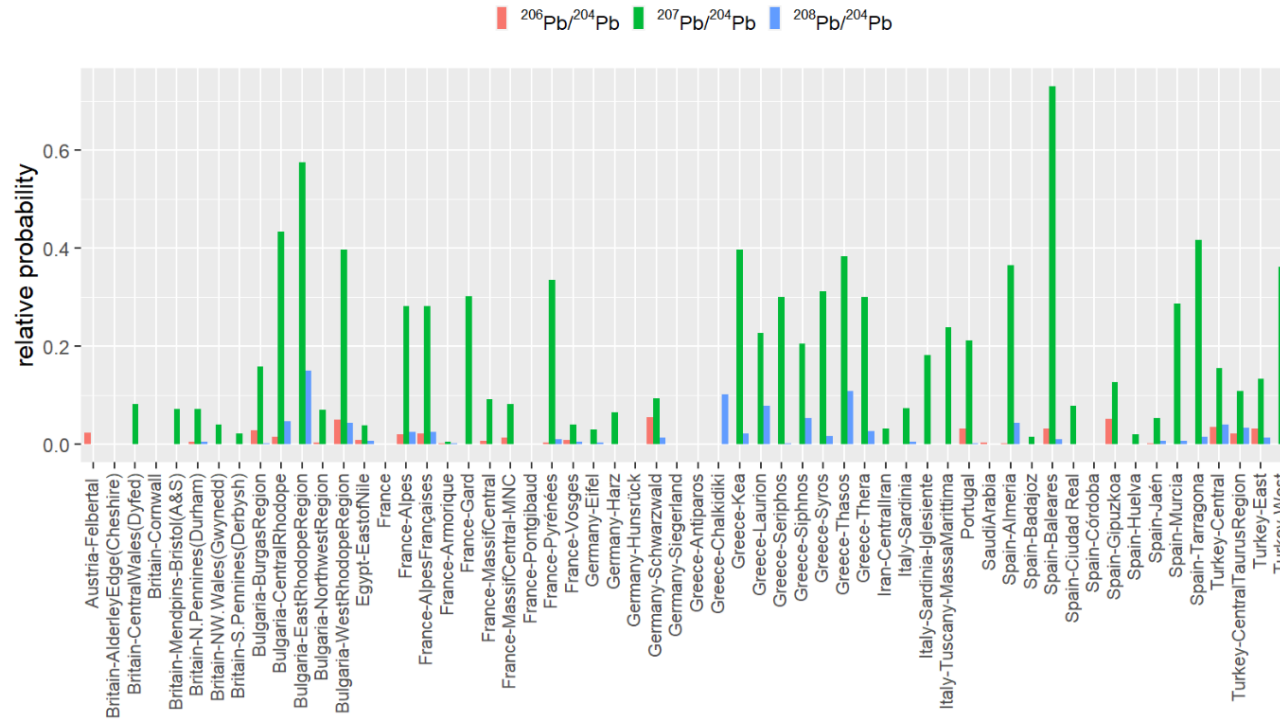

| Mining_Region                  | prob_206 | prob_207 | prob_208 | min>5%? | min |
|--------------------------------|----------|----------|----------|---------|-----|
| Austria-Felbertal              | 2%       | 0%       | 0%       | 0       | 0%  |
| Britain-AlderleyEdge(Cheshire) | 0%       | 0%       | 0%       | 0       | 0%  |
| Britain-CentralWales(Dyfed)    | 0%       | 8%       | 0%       | 0       | 0%  |
| Britain-Cornwall               | 0%       | 0%       | 0%       | 0       | 0%  |
| Britain-Mendpins-Bristol(A&S)  | 0%       | 7%       | 0%       | 0       | 0%  |
| Britain-N.Pennines(Durham)     | 0%       | 7%       | 1%       | 0       | 0%  |
| Britain-NW.Wales(Gwynedd)      | 0%       | 4%       | 0%       | 0       | 0%  |
| Britain-S.Pennines(Derbysh)    | 0%       | 2%       | 0%       | 0       | 0%  |
| Bulgaria-BurgasRegion          | 3%       | 16%      | 0%       | 0       | 0%  |
| Bulgaria-CentralRhodope        | 1%       | 43%      | 5%       | 0       | 1%  |
| Bulgaria-EastRhodopeRegion     | 0%       | 58%      | 15%      | 0       | 0%  |
| Bulgaria-NorthwestRegion       | 0%       | 7%       | 0%       | 0       | 0%  |
| Bulgaria-WestRhodopeRegion     | 5%       | 40%      | 4%       | 0       | 4%  |
| Egypt-EastofNile               | 1%       | 4%       | 1%       | 0       | 1%  |
| France                         | 0%       | 0%       | 0%       | 0       | 0%  |
| France-Alpes                   | 2%       | 28%      | 2%       | 0       | 2%  |
| France-AlpesFrançaises         | 2%       | 28%      | 2%       | 0       | 2%  |
| France-Armoriques              | 0%       | 0%       | 0%       | 0       | 0%  |
| France-Gard                    | 0%       | 30%      | 0%       | 0       | 0%  |
| France-MassifCentral           | 1%       | 9%       | 0%       | 0       | 0%  |
| France-MassifCentral-MNC       | 1%       | 8%       | 0%       | 0       | 0%  |
| France-Pontgibaud              | 0%       | 0%       | 0%       | 0       | 0%  |
| France-Pyrénées                | 0%       | 33%      | 1%       | 0       | 0%  |
| France-Vosges                  | 1%       | 4%       | 1%       | 0       | 1%  |
| Germany-Eifel                  | 0%       | 3%       | 0%       | 0       | 0%  |
| Germany-Harz                   | 0%       | 6%       | 0%       | 0       | 0%  |
| Germany-Hunsrück               | 0%       | 0%       | 0%       | 0       | 0%  |
| Germany-Schwarzwald            | 5%       | 9%       | 1%       | 0       | 1%  |
| Germany-Siegerland             | 0%       | 0%       | 0%       | 0       | 0%  |
| Greece-Antiparos               | 0%       | 0%       | 0%       | 0       | 0%  |
| Greece-Chalkidiki              | 0%       | 0%       | 10%      | 0       | 0%  |
| Greece-Kea                     | 0%       | 40%      | 2%       | 0       | 0%  |
| Greece-Laurion                 | 0%       | 23%      | 8%       | 0       | 0%  |
| Greece-Seriphos                | 0%       | 30%      | 0%       | 0       | 0%  |
| Greece-Siphnos                 | 0%       | 21%      | 5%       | 0       | 0%  |
| Greece-Syros                   | 0%       | 31%      | 2%       | 0       | 0%  |
| Greece-Thasos                  | 0%       | 38%      | 11%      | 0       | 0%  |
| Greece-Thera                   | 0%       | 30%      | 3%       | 0       | 0%  |
| Iran-Centrallran               | 0%       | 3%       | 0%       | 0       | 0%  |
| Italy-Sardinia                 | 0%       | 7%       | 1%       | 0       | 0%  |
| Italy-Sardinia-Iglesiente      | 0%       | 18%      | 0%       | 0       | 0%  |
| Italy-Tuscany-MassaMarittima   | 0%       | 24%      | 0%       | 0       | 0%  |
| Portugal                       | 3%       | 21%      | 0%       | 0       | 0%  |
| SaudiArabia                    | 0%       | 0%       | 0%       | 0       | 0%  |
| Spain-Almeria                  | 0%       | 36%      | 4%       | 0       | 0%  |
| Spain-Badajoz                  | 0%       | 1%       | 0%       | 0       | 0%  |
| Spain-Baleares                 | 3%       | 73%      | 1%       | 0       | 1%  |
| Spain-Ciudad Real              | 0%       | 8%       | 0%       | 0       | 0%  |
| Spain-Córdoba                  | 0%       | 0%       | 0%       | 0       | 0%  |
| Spain-Gipuzkoa                 | 5%       | 13%      | 0%       | 0       | 0%  |
| Spain-Huelva                   | 0%       | 2%       | 0%       | 0       | 0%  |
| Spain-Jaén                     | 0%       | 5%       | 1%       | 0       | 0%  |
| Spain-Murcia                   | 0%       | 29%      | 1%       | 0       | 0%  |
| Spain-Tarragona                | 0%       | 42%      | 2%       | 0       | 0%  |
| Turkey-Central                 | 4%       | 15%      | 4%       | 0       | 4%  |
| Turkey-CentralTaurusRegion     | 2%       | 11%      | 3%       | 0       | 2%  |
| Turkey-East                    | 3%       | 13%      | 1%       | 0       | 1%  |
| Turkey-West                    | 0%       | 36%      | 8%       | 0       | 0%  |

d. Nowhere

### 13-Denarius-197-1a-b

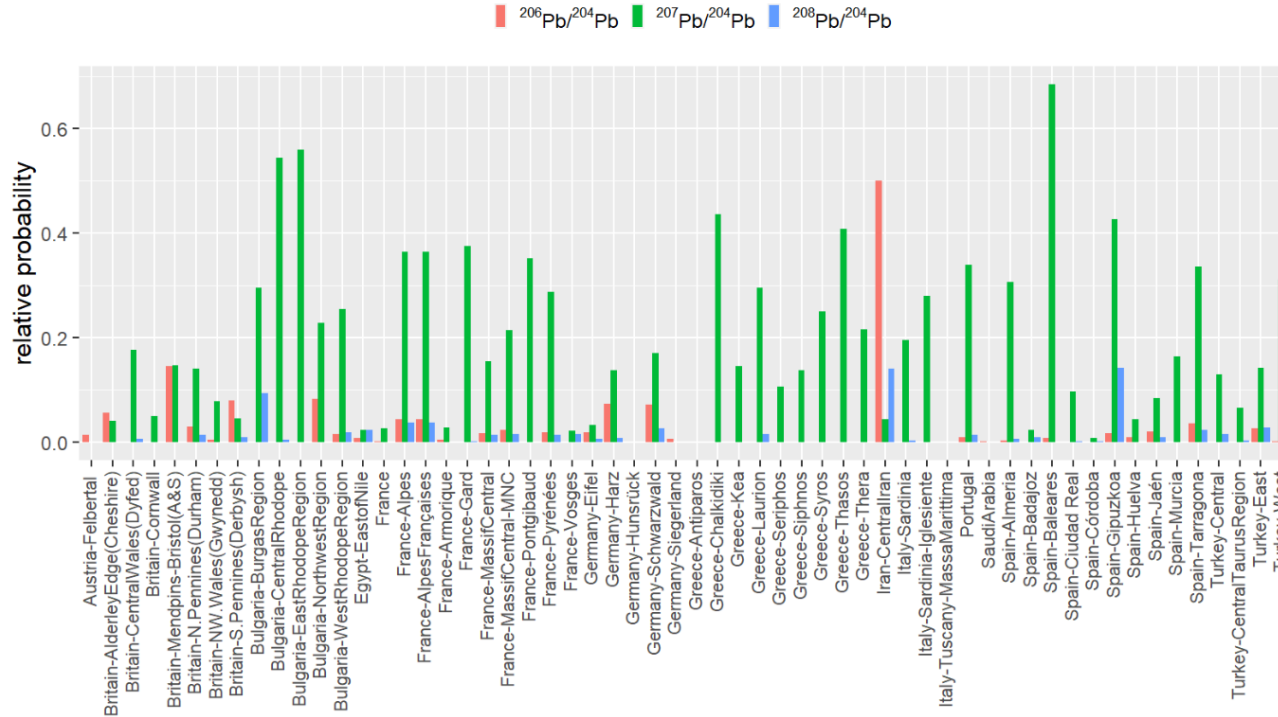

| Mining_Region                  | prob_206 | prob_207 | prob_208 | min>5%? | min |
|--------------------------------|----------|----------|----------|---------|-----|
| Austria-Felbertal              | 1%       | 0%       | 0%       | 0       | 0%  |
| Britain-AlderleyEdge(Cheshire) | 6%       | 4%       | 0%       | 0       | 0%  |
| Britain-CentralWales(Dyfed)    | 0%       | 18%      | 1%       | 0       | 0%  |
| Britain-Cornwall               | 0%       | 5%       | 0%       | 0       | 0%  |
| Britain-Mendpins-Bristol(A&S)  | 15%      | 15%      | 0%       | 0       | 0%  |
| Britain-N. Pennines(Durham)    | 3%       | 14%      | 1%       | 0       | 1%  |
| Britain-NW. Wales(Gwynedd)     | 0%       | 8%       | 0%       | 0       | 0%  |
| Britain-S. Pennines(Derbysh)   | 8%       | 4%       | 1%       | 0       | 1%  |
| Bulgaria-BurgasRegion          | 0%       | 30%      | 9%       | 0       | 0%  |
| Bulgaria-CentralRhodope        | 0%       | 54%      | 0%       | 0       | 0%  |
| Bulgaria-EastRhodopeRegion     | 0%       | 56%      | 0%       | 0       | 0%  |
| Bulgaria-NorthwestRegion       | 8%       | 23%      | 0%       | 0       | 0%  |
| Bulgaria-WestRhodopeRegion     | 2%       | 25%      | 2%       | 0       | 2%  |
| Egypt-EastofNile               | 1%       | 2%       | 2%       | 0       | 1%  |
| France                         | 0%       | 3%       | 0%       | 0       | 0%  |
| France-Alpes                   | 4%       | 36%      | 4%       | 0       | 4%  |
| France-AlpesFrançaises         | 4%       | 36%      | 4%       | 0       | 4%  |
| France-Armorique               | 1%       | 3%       | 0%       | 0       | 0%  |
| France-Gard                    | 0%       | 38%      | 0%       | 0       | 0%  |
| France-MassifCentral           | 2%       | 16%      | 1%       | 0       | 1%  |
| France-MassifCentral-MNC       | 2%       | 21%      | 2%       | 0       | 2%  |
| France-Portgibaud              | 0%       | 35%      | 0%       | 0       | 0%  |
| France-Pyrénées                | 2%       | 29%      | 1%       | 0       | 1%  |
| France-Vosges                  | 0%       | 2%       | 2%       | 0       | 0%  |
| Germany-Eifel                  | 2%       | 3%       | 1%       | 0       | 1%  |
| Germany-Harz                   | 7%       | 14%      | 1%       | 0       | 1%  |
| Germany-Hunsrück               | 0%       | 0%       | 0%       | 0       | 0%  |
| Germany-Schwarzwald            | 7%       | 17%      | 3%       | 0       | 3%  |
| Germany-Siegerland             | 1%       | 0%       | 0%       | 0       | 0%  |
| Greece-Antiparos               | 0%       | 0%       | 0%       | 0       | 0%  |
| Greece-Chalkidiki              | 0%       | 44%      | 0%       | 0       | 0%  |
| Greece-Kea                     | 0%       | 14%      | 0%       | 0       | 0%  |
| Greece-Laurion                 | 0%       | 30%      | 2%       | 0       | 0%  |
| Greece-Seriphos                | 0%       | 11%      | 0%       | 0       | 0%  |
| Greece-Siphnos                 | 0%       | 14%      | 0%       | 0       | 0%  |
| Greece-Syros                   | 0%       | 25%      | 0%       | 0       | 0%  |
| Greece-Thasos                  | 0%       | 41%      | 0%       | 0       | 0%  |
| Greece-Thera                   | 0%       | 22%      | 0%       | 0       | 0%  |
| Iran-Centrallran               | 50%      | 4%       | 14%      | 0       | 4%  |
| Italy-Sardinia                 | 0%       | 20%      | 0%       | 0       | 0%  |
| Italy-Sardinia-Iglesiente      | 0%       | 28%      | 0%       | 0       | 0%  |
| Italy-Tuscany-MassaMarittima   | 0%       | 0%       | 0%       | 0       | 0%  |
| Portugal                       | 1%       | 34%      | 1%       | 0       | 1%  |
| SaudiArabia                    | 0%       | 0%       | 0%       | 0       | 0%  |
| Spain-Almeria                  | 0%       | 31%      | 1%       | 0       | 0%  |
| Spain-Badajoz                  | 0%       | 2%       | 1%       | 0       | 0%  |
| Spain-Baleares                 | 1%       | 68%      | 0%       | 0       | 0%  |
| Spain-Ciudad Real              | 0%       | 10%      | 0%       | 0       | 0%  |
| Spain-Córdoba                  | 0%       | 1%       | 0%       | 0       | 0%  |
| Spain-Gipuzkoa                 | 2%       | 43%      | 14%      | 0       | 2%  |
| Spain-Huelva                   | 1%       | 4%       | 0%       | 0       | 0%  |
| Spain-Jaén                     | 2%       | 8%       | 1%       | 0       | 1%  |
| Spain-Murcia                   | 0%       | 16%      | 0%       | 0       | 0%  |
| Spain-Tarragona                | 4%       | 34%      | 2%       | 0       | 2%  |
| Turkey-Central                 | 0%       | 13%      | 2%       | 0       | 0%  |
| Turkey-CentralTaurusRegion     | 0%       | 7%       | 0%       | 0       | 0%  |
| Turkey-East                    | 3%       | 14%      | 3%       | 0       | 3%  |
| Turkey-West                    | 0%       | 31%      | 1%       | 0       | 0%  |

MS009

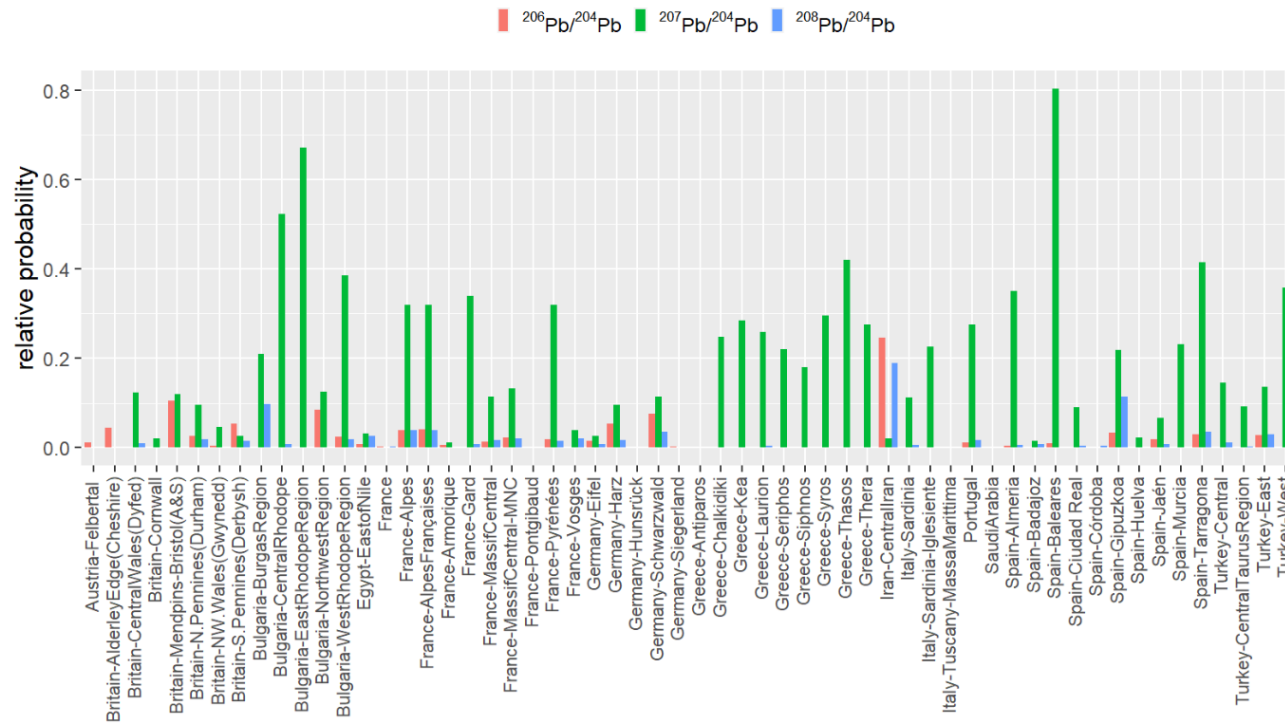

| Mining_Region                  | prob_206 | prob_207 | prob_208 | min>5%? | min |
|--------------------------------|----------|----------|----------|---------|-----|
| Austria-Felbertal              | 1%       | 0%       | 0%       | 0       | 0%  |
| Britain-AlderleyEdge(Cheshire) | 4%       | 0%       | 0%       | 0       | 0%  |
| Britain-CentralWales(Dyfed)    | 0%       | 12%      | 1%       | 0       | 0%  |
| Britain-Cornwall               | 0%       | 2%       | 0%       | 0       | 0%  |
| Britain-Mendips-Bristol(A&S)   | 11%      | 12%      | 0%       | 0       | 0%  |
| Britain-N. Pennines(Durham)    | 3%       | 10%      | 2%       | 0       | 2%  |
| Britain-NW. Wales(Gwynedd)     | 0%       | 5%       | 0%       | 0       | 0%  |
| Britain-S. Pennines(Derbysh)   | 5%       | 3%       | 1%       | 0       | 1%  |
| Bulgaria-BurgasRegion          | 0%       | 21%      | 10%      | 0       | 0%  |
| Bulgaria-CentralRhodope        | 0%       | 52%      | 1%       | 0       | 0%  |
| Bulgaria-EastRhodopeRegion     | 0%       | 67%      | 0%       | 0       | 0%  |
| Bulgaria-NorthwestRegion       | 8%       | 13%      | 0%       | 0       | 0%  |
| Bulgaria-WestRhodopeRegion     | 2%       | 39%      | 2%       | 0       | 2%  |
| Egypt-EastofNile               | 1%       | 3%       | 2%       | 0       | 1%  |
| France                         | 0%       | 0%       | 0%       | 0       | 0%  |
| France-Alpes                   | 4%       | 32%      | 4%       | 0       | 4%  |
| France-AlpesFrançaises         | 4%       | 32%      | 4%       | 0       | 4%  |
| France-Armorique               | 0%       | 1%       | 0%       | 0       | 0%  |
| France-Gard                    | 0%       | 34%      | 1%       | 0       | 0%  |
| France-MassifCentral           | 1%       | 11%      | 2%       | 0       | 1%  |
| France-MassifCentral-MNC       | 2%       | 13%      | 2%       | 0       | 2%  |
| France-Pontgibaud              | 0%       | 0%       | 0%       | 0       | 0%  |
| France-Pyrénées                | 2%       | 32%      | 1%       | 0       | 1%  |
| France-Vosges                  | 0%       | 4%       | 2%       | 0       | 0%  |
| Germany-Eifel                  | 1%       | 3%       | 1%       | 0       | 1%  |
| Germany-Harz                   | 5%       | 10%      | 2%       | 0       | 2%  |
| Germany-Hunsrück               | 0%       | 0%       | 0%       | 0       | 0%  |
| Germany-Schwarzwald            | 7%       | 11%      | 3%       | 0       | 3%  |
| Germany-Siegerland             | 0%       | 0%       | 0%       | 0       | 0%  |
| Greece-Antiparos               | 0%       | 0%       | 0%       | 0       | 0%  |
| Greece-Chalkidiki              | 0%       | 25%      | 0%       | 0       | 0%  |
| Greece-Kea                     | 0%       | 28%      | 0%       | 0       | 0%  |
| Greece-Laurion                 | 0%       | 26%      | 0%       | 0       | 0%  |
| Greece-Seriphos                | 0%       | 22%      | 0%       | 0       | 0%  |
| Greece-Siphnos                 | 0%       | 18%      | 0%       | 0       | 0%  |
| Greece-Syros                   | 0%       | 30%      | 0%       | 0       | 0%  |
| Greece-Thasos                  | 0%       | 42%      | 0%       | 0       | 0%  |
| Greece-Thera                   | 0%       | 27%      | 0%       | 0       | 0%  |
| Iran-Centrallran               | 24%      | 2%       | 19%      | 0       | 2%  |
| Italy-Sardinia                 | 0%       | 11%      | 0%       | 0       | 0%  |
| Italy-Sardinia-Iglesiente      | 0%       | 22%      | 0%       | 0       | 0%  |
| Italy-Tuscany-MassaMarittima   | 0%       | 0%       | 0%       | 0       | 0%  |
| Portugal                       | 1%       | 28%      | 2%       | 0       | 1%  |
| SaudiArabia                    | 0%       | 0%       | 0%       | 0       | 0%  |
| Spain-Almeria                  | 0%       | 35%      | 1%       | 0       | 0%  |
| Spain-Badajoz                  | 0%       | 1%       | 1%       | 0       | 0%  |
| Spain-Baleares                 | 1%       | 80%      | 0%       | 0       | 0%  |
| Spain-Ciudad Real              | 0%       | 9%       | 0%       | 0       | 0%  |
| Spain-Córdoba                  | 0%       | 0%       | 0%       | 0       | 0%  |
| Spain-Gipuzkoa                 | 3%       | 22%      | 11%      | 0       | 3%  |
| Spain-Huelva                   | 0%       | 2%       | 0%       | 0       | 0%  |
| Spain-Jaén                     | 2%       | 7%       | 1%       | 0       | 1%  |
| Spain-Murcia                   | 0%       | 23%      | 0%       | 0       | 0%  |
| Spain-Tarragona                | 3%       | 41%      | 4%       | 0       | 3%  |
| Turkey-Central                 | 0%       | 14%      | 1%       | 0       | 0%  |
| Turkey-CentralTaurusRegion     | 0%       | 9%       | 0%       | 0       | 0%  |
| Turkey-East                    | 3%       | 14%      | 3%       | 0       | 3%  |
| Turkey-West                    | 0%       | 36%      | 0%       | 0       | 0%  |

MS012

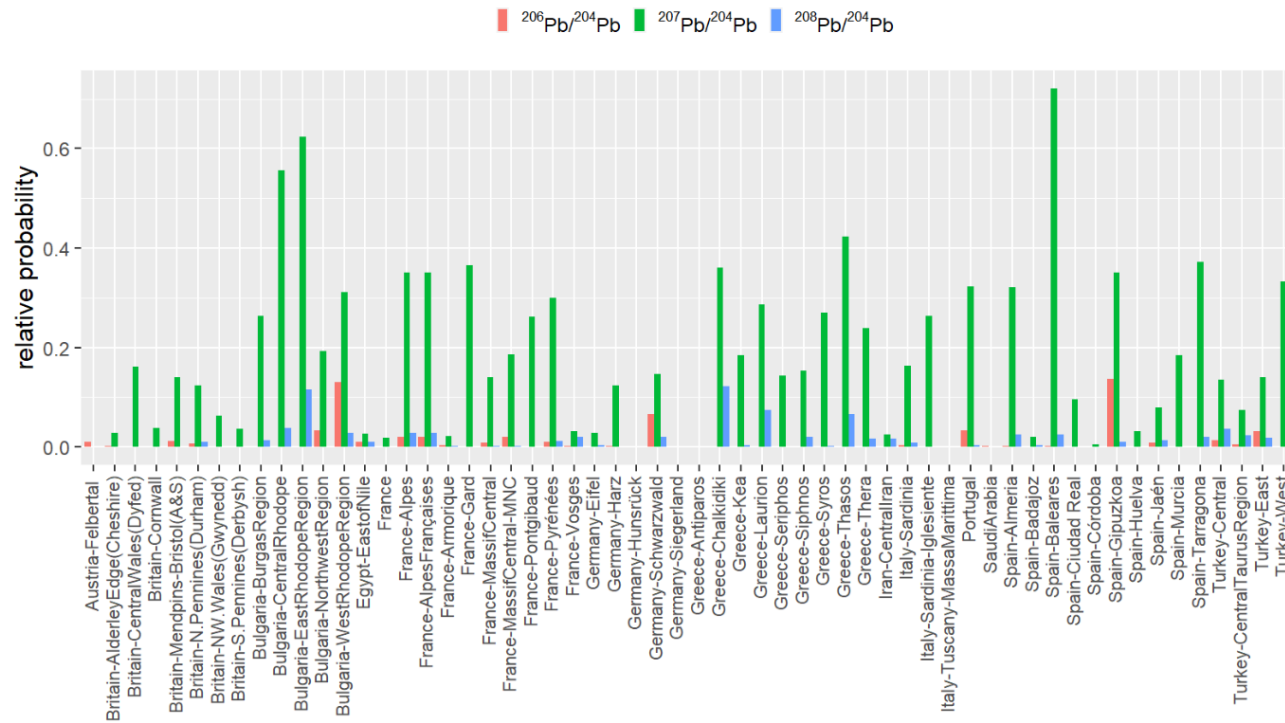

| Mining_Region                  | prob_206 | prob_207 | prob_208 | min>5%? | min |
|--------------------------------|----------|----------|----------|---------|-----|
| Austria-Felbertal              | 1%       | 0%       | 0%       | 0       | 0%  |
| Britain-AlderleyEdge(Cheshire) | 0%       | 3%       | 0%       | 0       | 0%  |
| Britain-CentralWales(Dyfed)    | 0%       | 16%      | 0%       | 0       | 0%  |
| Britain-Cornwall               | 0%       | 4%       | 0%       | 0       | 0%  |
| Britain-Mendips-Bristol(A&S)   | 1%       | 14%      | 0%       | 0       | 0%  |
| Britain-N. Pennines(Durham)    | 1%       | 12%      | 1%       | 0       | 1%  |
| Britain-NW. Wales(Gwynedd)     | 0%       | 6%       | 0%       | 0       | 0%  |
| Britain-S. Pennines(Derbysh)   | 0%       | 4%       | 0%       | 0       | 0%  |
| Bulgaria-BurgasRegion          | 0%       | 26%      | 1%       | 0       | 0%  |
| Bulgaria-CentralRhodope        | 0%       | 56%      | 4%       | 0       | 0%  |
| Bulgaria-EastRhodopeRegion     | 0%       | 62%      | 11%      | 0       | 0%  |
| Bulgaria-NorthwestRegion       | 3%       | 19%      | 0%       | 0       | 0%  |
| Bulgaria-WestRhodopeRegion     | 13%      | 31%      | 3%       | 0       | 3%  |
| Egypt-EastofNile               | 1%       | 3%       | 1%       | 0       | 1%  |
| France                         | 0%       | 2%       | 0%       | 0       | 0%  |
| France-Alpes                   | 2%       | 35%      | 3%       | 0       | 0%  |
| France-AlpesFrançaises         | 2%       | 35%      | 3%       | 0       | 2%  |
| France-Armorique               | 0%       | 2%       | 0%       | 0       | 0%  |
| France-Gard                    | 0%       | 37%      | 0%       | 0       | 0%  |
| France-MassifCentral           | 1%       | 14%      | 0%       | 0       | 0%  |
| France-MassifCentral-MNC       | 2%       | 19%      | 0%       | 0       | 0%  |
| France-Pontgibaud              | 0%       | 26%      | 0%       | 0       | 0%  |
| France-Pyrénées                | 1%       | 30%      | 1%       | 0       | 1%  |
| France-Vosges                  | 0%       | 3%       | 2%       | 0       | 0%  |
| Germany-Eifel                  | 0%       | 3%       | 0%       | 0       | 0%  |
| Germany-Harz                   | 0%       | 12%      | 0%       | 0       | 0%  |
| Germany-Hunsrück               | 0%       | 0%       | 0%       | 0       | 0%  |
| Germany-Schwarzwald            | 7%       | 15%      | 2%       | 0       | 2%  |
| Germany-Siegerland             | 0%       | 0%       | 0%       | 0       | 0%  |
| Greece-Antiparos               | 0%       | 0%       | 0%       | 0       | 0%  |
| Greece-Chalkidiki              | 0%       | 36%      | 12%      | 0       | 0%  |
| Greece-Kea                     | 0%       | 18%      | 0%       | 0       | 0%  |
| Greece-Laurion                 | 0%       | 29%      | 7%       | 0       | 0%  |
| Greece-Seriphos                | 0%       | 14%      | 0%       | 0       | 0%  |
| Greece-Siphnos                 | 0%       | 15%      | 2%       | 0       | 0%  |
| Greece-Syros                   | 0%       | 27%      | 0%       | 0       | 0%  |
| Greece-Thasos                  | 0%       | 42%      | 7%       | 0       | 0%  |
| Greece-Thera                   | 0%       | 24%      | 2%       | 0       | 0%  |
| Iran-CentrallIran              | 0%       | 3%       | 2%       | 0       | 0%  |
| Italy-Sardinia-Iglesiente      | 0%       | 16%      | 1%       | 0       | 0%  |
| Italy-Tuscany-MassaMarittima   | 0%       | 26%      | 0%       | 0       | 0%  |
| Portugal                       | 3%       | 32%      | 0%       | 0       | 0%  |
| SaudiArabia                    | 0%       | 0%       | 0%       | 0       | 0%  |
| Spain-Almeria                  | 0%       | 32%      | 3%       | 0       | 0%  |
| Spain-Badajoz                  | 0%       | 2%       | 0%       | 0       | 0%  |
| Spain-Baleares                 | 0%       | 72%      | 3%       | 0       | 0%  |
| Spain-Ciudad Real              | 0%       | 10%      | 0%       | 0       | 0%  |
| Spain-Córdoba                  | 0%       | 1%       | 0%       | 0       | 0%  |
| Spain-Gipuzkoa                 | 14%      | 35%      | 1%       | 0       | 1%  |
| Spain-Huelva                   | 0%       | 3%       | 0%       | 0       | 0%  |
| Spain-Jaén                     | 1%       | 8%       | 1%       | 0       | 1%  |
| Spain-Murcia                   | 0%       | 18%      | 0%       | 0       | 0%  |
| Spain-Tarragona                | 0%       | 37%      | 2%       | 0       | 0%  |
| Turkey-Central                 | 1%       | 14%      | 4%       | 0       | 1%  |
| Turkey-CentralTaurusRegion     | 1%       | 7%       | 2%       | 0       | 1%  |
| Turkey-East                    | 3%       | 14%      | 2%       | 0       | 2%  |
| Turkey-West                    | 0%       | 33%      | 6%       | 0       | 0%  |

MS054

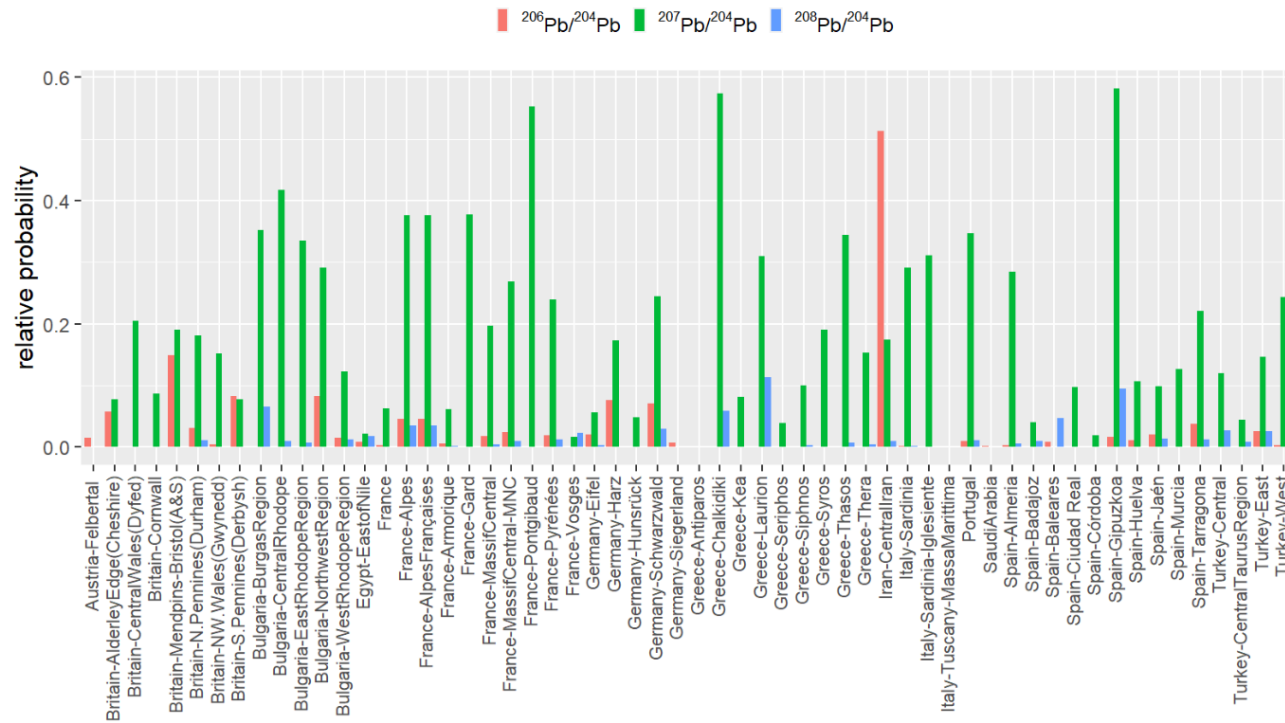

| Mining_Region                  | prob_206 | prob_207 | prob_208 | min>5%? | min |
|--------------------------------|----------|----------|----------|---------|-----|
| Austria-Felbertal              | 1%       | 0%       | 0%       | 0       | 0%  |
| Britain-AlderleyEdge(Cheshire) | 6%       | 8%       | 0%       | 0       | 0%  |
| Britain-CentralWales(Dyfed)    | 0%       | 20%      | 0%       | 0       | 0%  |
| Britain-Cornwall               | 0%       | 9%       | 0%       | 0       | 0%  |
| Britain-Mendpins-Bristol(A&S)  | 15%      | 19%      | 0%       | 0       | 0%  |
| Britain-N. Pennines(Durham)    | 3%       | 18%      | 1%       | 0       | 1%  |
| Britain-NW. Wales(Gwynedd)     | 0%       | 15%      | 0%       | 0       | 0%  |
| Britain-S. Pennines(Derbysh)   | 8%       | 8%       | 0%       | 0       | 0%  |
| Bulgaria-BurgasRegion          | 0%       | 35%      | 7%       | 0       | 0%  |
| Bulgaria-CentralRhodope        | 0%       | 42%      | 1%       | 0       | 0%  |
| Bulgaria-EastRhodopeRegion     | 0%       | 34%      | 1%       | 0       | 0%  |
| Bulgaria-NorthwestRegion       | 8%       | 29%      | 0%       | 0       | 0%  |
| Bulgaria-WestRhodopeRegion     | 2%       | 12%      | 1%       | 0       | 1%  |
| Egypt-EastofNile               | 1%       | 2%       | 2%       | 0       | 1%  |
| France                         | 0%       | 6%       | 0%       | 0       | 0%  |
| France-Alpes                   | 4%       | 38%      | 3%       | 0       | 3%  |
| France-AlpesFrançaises         | 4%       | 38%      | 3%       | 0       | 3%  |
| France-Armorique               | 1%       | 6%       | 0%       | 0       | 0%  |
| France-Gard                    | 0%       | 38%      | 0%       | 0       | 0%  |
| France-MassifCentral           | 2%       | 20%      | 0%       | 0       | 0%  |
| France-MassifCentral-MNC       | 2%       | 27%      | 1%       | 0       | 1%  |
| France-Pontgibaud              | 0%       | 55%      | 0%       | 0       | 0%  |
| France-Pyrénées                | 2%       | 24%      | 1%       | 0       | 1%  |
| France-Vosges                  | 0%       | 2%       | 2%       | 0       | 0%  |
| Germany-Eifel                  | 2%       | 6%       | 0%       | 0       | 0%  |
| Germany-Harz                   | 8%       | 17%      | 0%       | 0       | 0%  |
| Germany-Hunsrück               | 0%       | 5%       | 0%       | 0       | 0%  |
| Germany-Schwarzwald            | 7%       | 24%      | 3%       | 0       | 3%  |
| Germany-Siegerland             | 1%       | 0%       | 0%       | 0       | 0%  |
| Greece-Antiparos               | 0%       | 0%       | 0%       | 0       | 0%  |
| Greece-Chalkidiki              | 0%       | 57%      | 6%       | 0       | 0%  |
| Greece-Kea                     | 0%       | 8%       | 0%       | 0       | 0%  |
| Greece-Laurion                 | 0%       | 31%      | 11%      | 0       | 0%  |
| Greece-Seriphos                | 0%       | 4%       | 0%       | 0       | 0%  |
| Greece-Siphnos                 | 0%       | 10%      | 0%       | 0       | 0%  |
| Greece-Syros                   | 0%       | 19%      | 0%       | 0       | 0%  |
| Greece-Thasos                  | 0%       | 34%      | 1%       | 0       | 0%  |
| Greece-Thera                   | 0%       | 15%      | 0%       | 0       | 0%  |
| Iran-Centrallran               | 51%      | 17%      | 1%       | 0       | 1%  |
| Italy-Sardinia-Iglesiente      | 0%       | 31%      | 0%       | 0       | 0%  |
| Italy-Sardinia-Iglesiente      | 0%       | 29%      | 0%       | 0       | 0%  |
| Italy-Tuscany-MassaMarittima   | 1%       | 35%      | 1%       | 0       | 1%  |
| Portugal                       | 0%       | 0%       | 0%       | 0       | 0%  |
| SaudiArabia                    | 0%       | 0%       | 0%       | 0       | 0%  |
| Spain-Almeria                  | 0%       | 28%      | 1%       | 0       | 0%  |
| Spain-Badajoz                  | 0%       | 4%       | 1%       | 0       | 0%  |
| Spain-Baleares                 | 1%       | 0%       | 5%       | 0       | 0%  |
| Spain-Ciudad Real              | 0%       | 10%      | 0%       | 0       | 0%  |
| Spain-Córdoba                  | 0%       | 2%       | 0%       | 0       | 0%  |
| Spain-Gipuzkoa                 | 2%       | 58%      | 9%       | 0       | 2%  |
| Spain-Huelva                   | 1%       | 11%      | 0%       | 0       | 0%  |
| Spain-Jaén                     | 2%       | 10%      | 1%       | 0       | 1%  |
| Spain-Murcia                   | 0%       | 13%      | 0%       | 0       | 0%  |
| Spain-Tarragona                | 4%       | 22%      | 1%       | 0       | 1%  |
| Turkey-Central                 | 0%       | 12%      | 3%       | 0       | 0%  |
| Turkey-CentralTaurusRegion     | 0%       | 4%       | 1%       | 0       | 0%  |
| Turkey-East                    | 3%       | 15%      | 3%       | 0       | 3%  |
| Turkey-West                    | 0%       | 24%      | 3%       | 0       | 0%  |

R121

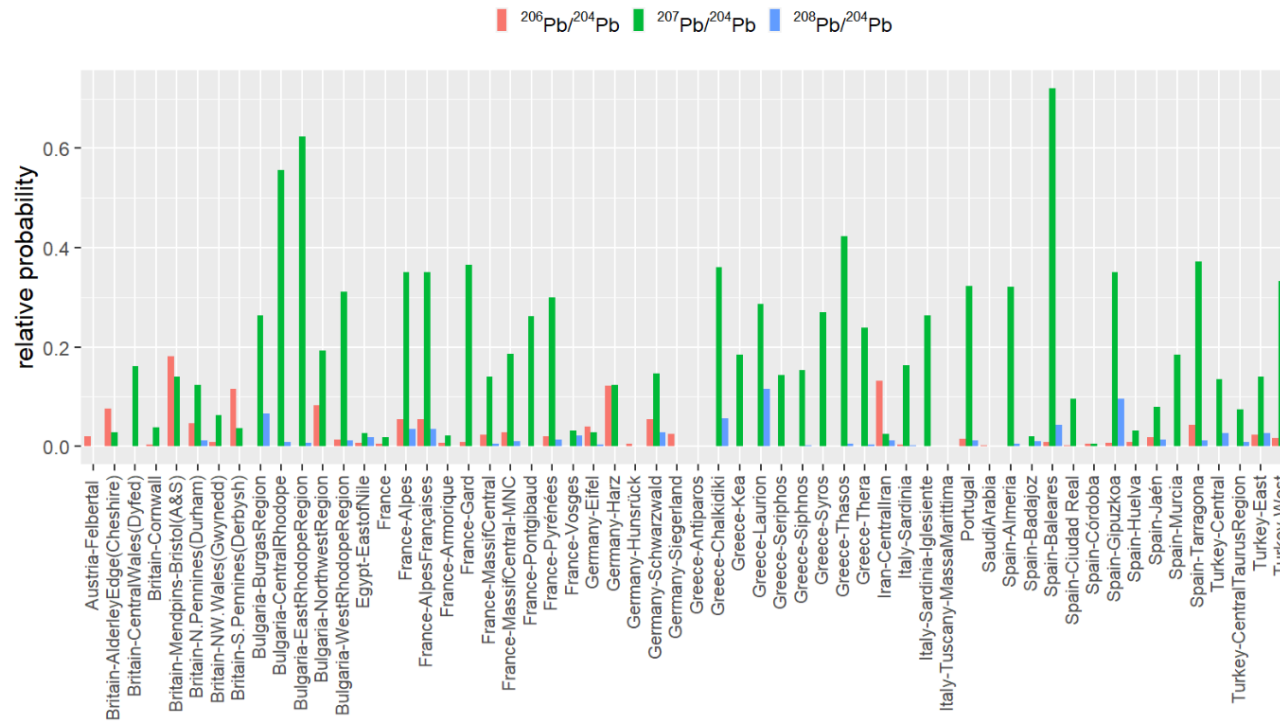

| Mining_Region                  | prob_206 | prob_207 | prob_208 | min>5%? | min |
|--------------------------------|----------|----------|----------|---------|-----|
| Austria-Felbertal              | 2%       | 0%       | 0%       | 0       | 0%  |
| Britain-AlderleyEdge(Cheshire) | 8%       | 3%       | 0%       | 0       | 0%  |
| Britain-CentralWales(Dyfed)    | 0%       | 16%      | 0%       | 0       | 0%  |
| Britain-Cornwall               | 0%       | 4%       | 0%       | 0       | 0%  |
| Britain-Mendips-Bristol(A&S)   | 18%      | 14%      | 0%       | 0       | 0%  |
| Britain-N.Pennines(Durham)     | 5%       | 12%      | 1%       | 0       | 1%  |
| Britain-NW.Wales(Gwynedd)      | 1%       | 6%       | 0%       | 0       | 0%  |
| Britain-S.Pennines(Derbysh)    | 11%      | 4%       | 0%       | 0       | 0%  |
| Bulgaria-BurgasRegion          | 0%       | 26%      | 7%       | 0       | 0%  |
| Bulgaria-CentralRhodope        | 0%       | 56%      | 1%       | 0       | 0%  |
| Bulgaria-EastRhodopeRegion     | 0%       | 62%      | 1%       | 0       | 0%  |
| Bulgaria-NorthwestRegion       | 8%       | 19%      | 0%       | 0       | 0%  |
| Bulgaria-WestRhodopeRegion     | 1%       | 31%      | 1%       | 0       | 1%  |
| Egypt-EastofNile               | 1%       | 3%       | 2%       | 0       | 1%  |
| France                         | 1%       | 2%       | 0%       | 0       | 0%  |
| France-Alpes                   | 5%       | 35%      | 3%       | 0       | 3%  |
| France-AlpesFrançaises         | 5%       | 35%      | 3%       | 0       | 3%  |
| France-Armorique               | 1%       | 2%       | 0%       | 0       | 0%  |
| France-Gard                    | 1%       | 37%      | 0%       | 0       | 0%  |
| France-MassifCentral           | 2%       | 14%      | 0%       | 0       | 0%  |
| France-MassifCentral-MNC       | 3%       | 19%      | 1%       | 0       | 1%  |
| France-Pontgibaud              | 0%       | 26%      | 0%       | 0       | 0%  |
| France-Pyrénées                | 2%       | 30%      | 1%       | 0       | 1%  |
| France-Vosges                  | 0%       | 3%       | 2%       | 0       | 0%  |
| Germany-Eifel                  | 4%       | 3%       | 0%       | 0       | 0%  |
| Germany-Harz                   | 12%      | 12%      | 0%       | 0       | 0%  |
| Germany-Hunsrück               | 1%       | 0%       | 0%       | 0       | 0%  |
| Germany-Schwarzwald            | 5%       | 15%      | 3%       | 0       | 3%  |
| Germany-Siegerland             | 2%       | 0%       | 0%       | 0       | 0%  |
| Greece-Antiparos               | 0%       | 0%       | 0%       | 0       | 0%  |
| Greece-Chalkidiki              | 0%       | 36%      | 6%       | 0       | 0%  |
| Greece-Kea                     | 0%       | 18%      | 0%       | 0       | 0%  |
| Greece-Laurion                 | 0%       | 29%      | 11%      | 0       | 0%  |
| Greece-Seriphos                | 0%       | 14%      | 0%       | 0       | 0%  |
| Greece-Siphnos                 | 0%       | 15%      | 0%       | 0       | 0%  |
| Greece-Syros                   | 0%       | 27%      | 0%       | 0       | 0%  |
| Greece-Thasos                  | 0%       | 42%      | 1%       | 0       | 0%  |
| Greece-Thera                   | 0%       | 24%      | 0%       | 0       | 0%  |
| Iran-Centrallran               | 13%      | 3%       | 1%       | 0       | 1%  |
| Italy-Sardinia-Iglesiente      | 0%       | 16%      | 0%       | 0       | 0%  |
| Italy-Sardinia-Iglesiente      | 0%       | 26%      | 0%       | 0       | 0%  |
| Italy-Tuscany-MassaMarittima   | 0%       | 0%       | 0%       | 0       | 0%  |
| Portugal                       | 1%       | 32%      | 1%       | 0       | 1%  |
| SaudiArabia                    | 0%       | 0%       | 0%       | 0       | 0%  |
| Spain-Almeria                  | 0%       | 32%      | 1%       | 0       | 0%  |
| Spain-Badajoz                  | 0%       | 2%       | 1%       | 0       | 0%  |
| Spain-Baleares                 | 1%       | 72%      | 4%       | 0       | 1%  |
| Spain-Ciudad Real              | 0%       | 10%      | 0%       | 0       | 0%  |
| Spain-Córdoba                  | 1%       | 1%       | 0%       | 0       | 0%  |
| Spain-Gipuzkoa                 | 1%       | 35%      | 10%      | 0       | 1%  |
| Spain-Huelva                   | 1%       | 3%       | 0%       | 0       | 0%  |
| Spain-Jaén                     | 2%       | 8%       | 1%       | 0       | 1%  |
| Spain-Murcia                   | 0%       | 18%      | 0%       | 0       | 0%  |
| Spain-Tarragona                | 4%       | 37%      | 1%       | 0       | 1%  |
| Turkey-Central                 | 0%       | 14%      | 3%       | 0       | 0%  |
| Turkey-CentralTaurusRegion     | 0%       | 7%       | 1%       | 0       | 0%  |
| Turkey-East                    | 2%       | 14%      | 3%       | 0       | 2%  |
| Turkey-West                    | 2%       | 33%      | 3%       | 0       | 2%  |
